# Supplementary material
Source: publisher figshare collection journal article supplement (https://acs.figshare.com/ndownloader/files/23235545)

## Supporting Information: NMR spectra

### Palladium-catalyzed *anti*-Michael reductive Heck reaction of $\alpha,\beta$ -unsaturated esters

Tao Guo,<sup>†</sup> Yalan Ding,<sup>†</sup> Lili Zhou,<sup>†</sup> Haiyan Xu,<sup>§</sup> Teck-Peng Loh<sup>†‡\*</sup> and Xiaojin Wu<sup>†\*</sup>

<sup>†</sup>Institute of Advanced Synthesis, School of Chemistry and Molecular Engineering, Nanjing Tech University, Nanjing 211816

<sup>‡</sup>Division of Chemistry and Biological Chemistry, School of Physical and Mathematical Sciences, Nanyang Technological University, Singapore 637616

<sup>§</sup>School of Environmental and Chemical Engineering, Jiangsu University of Science and Technology, Zhenjiang, Jiangsu 212003, China

*\*E-mail: iamxiaojinwu@njtech.edu.cn, teckpeng@ntu.edu.sg*

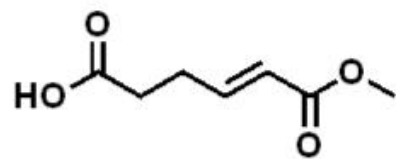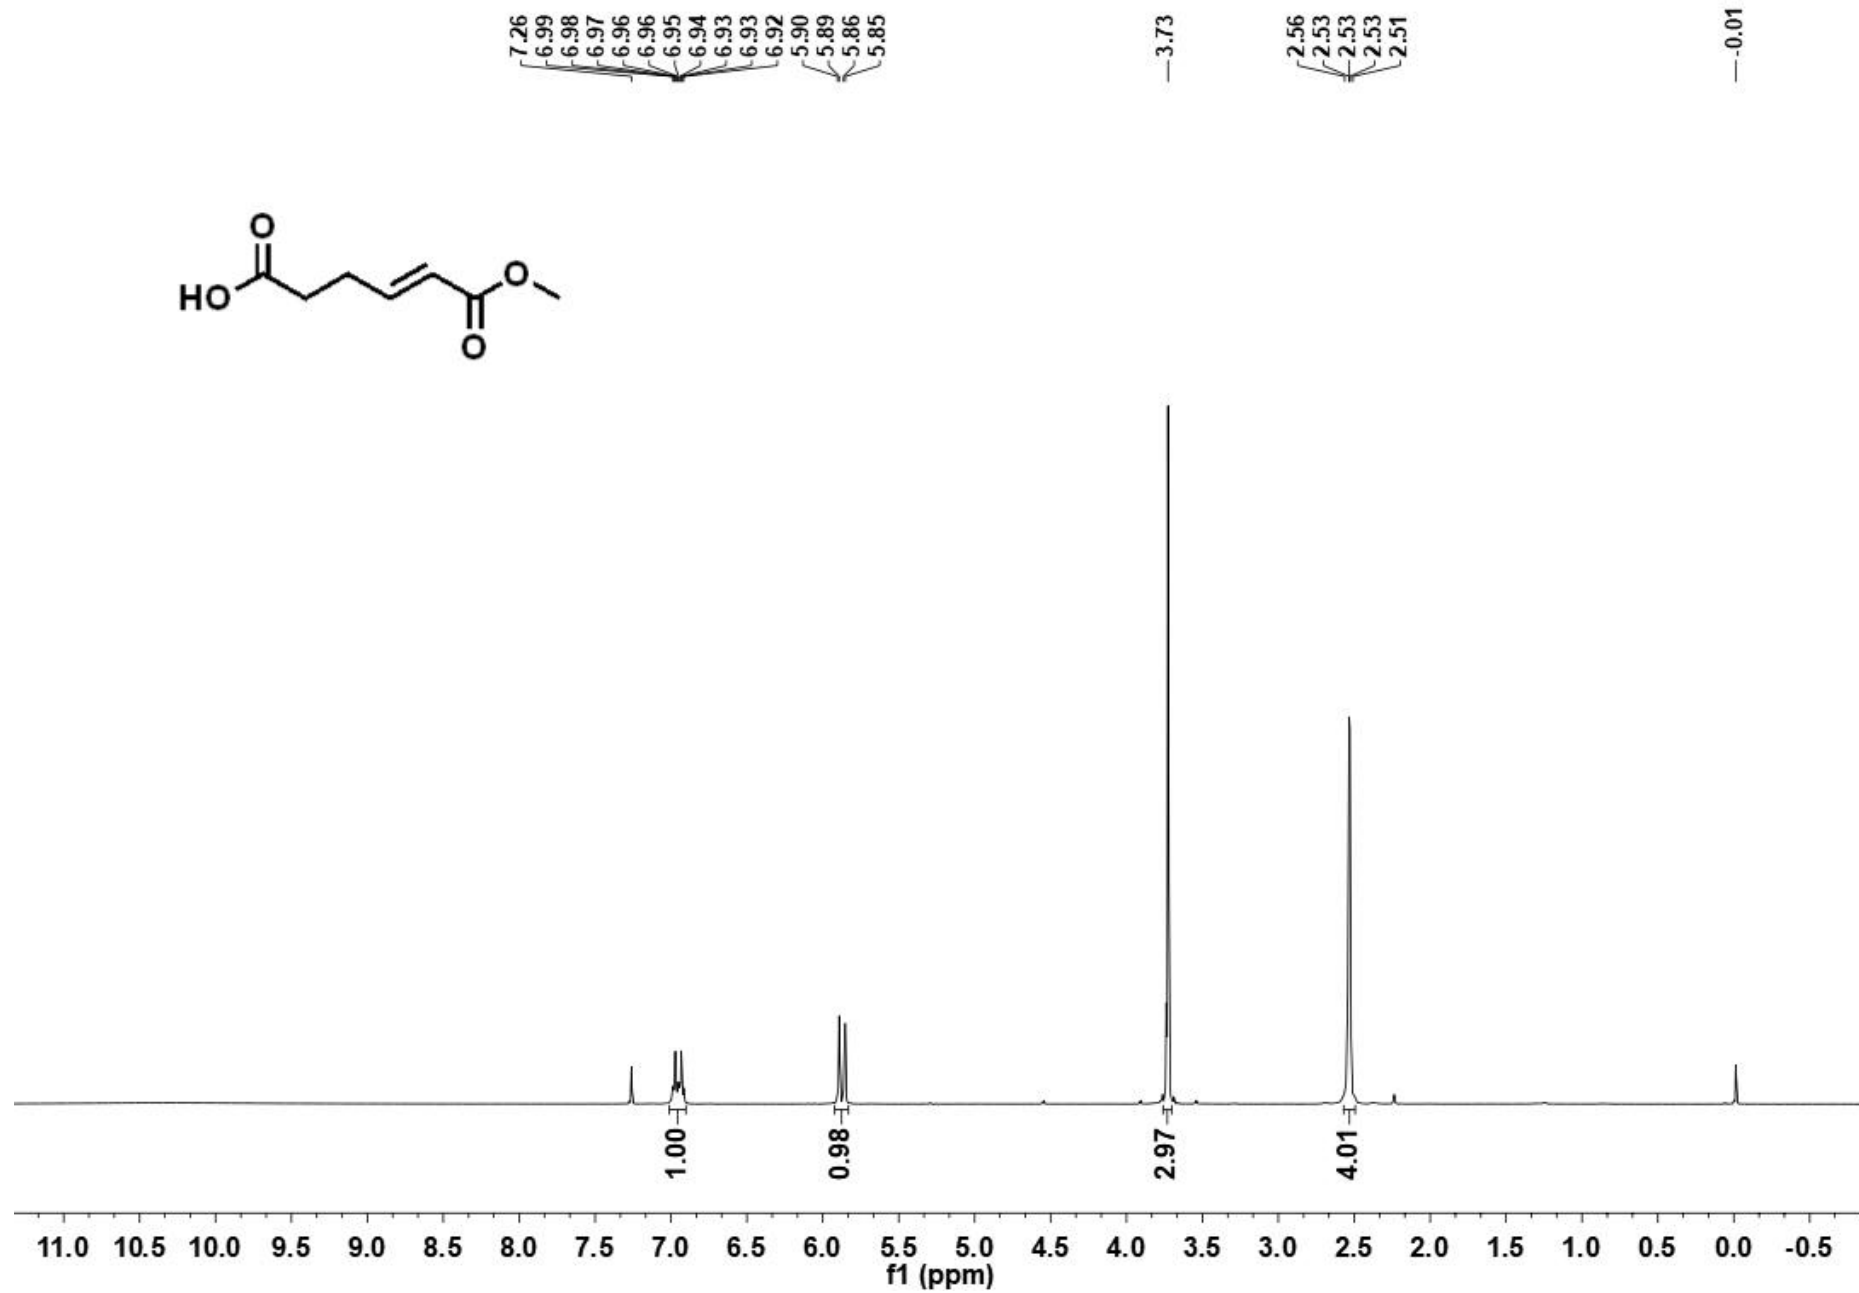

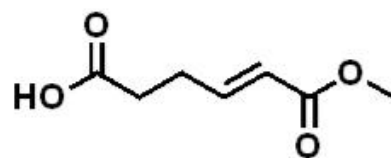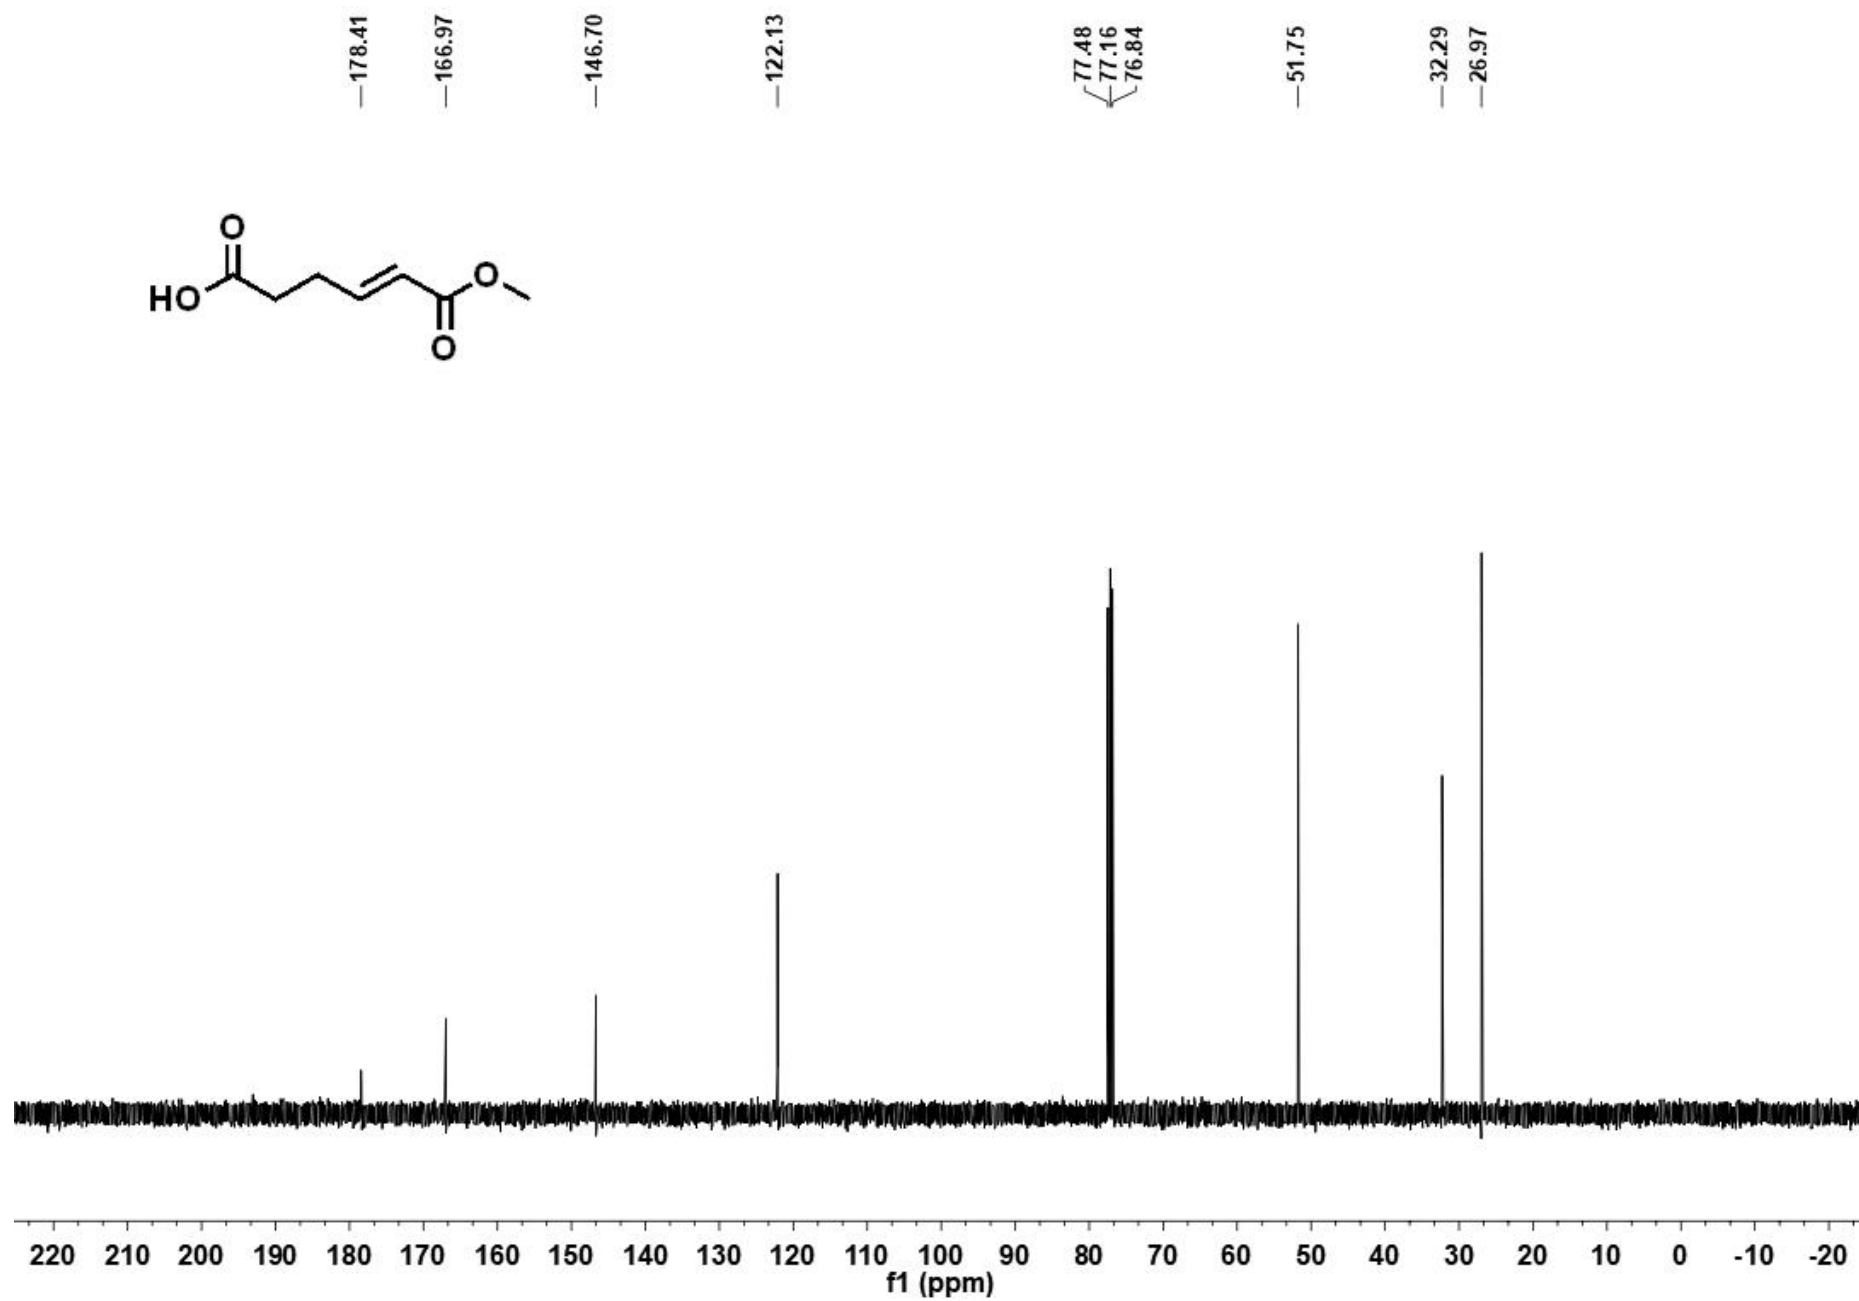

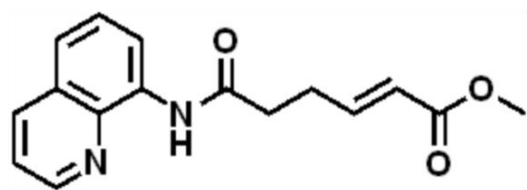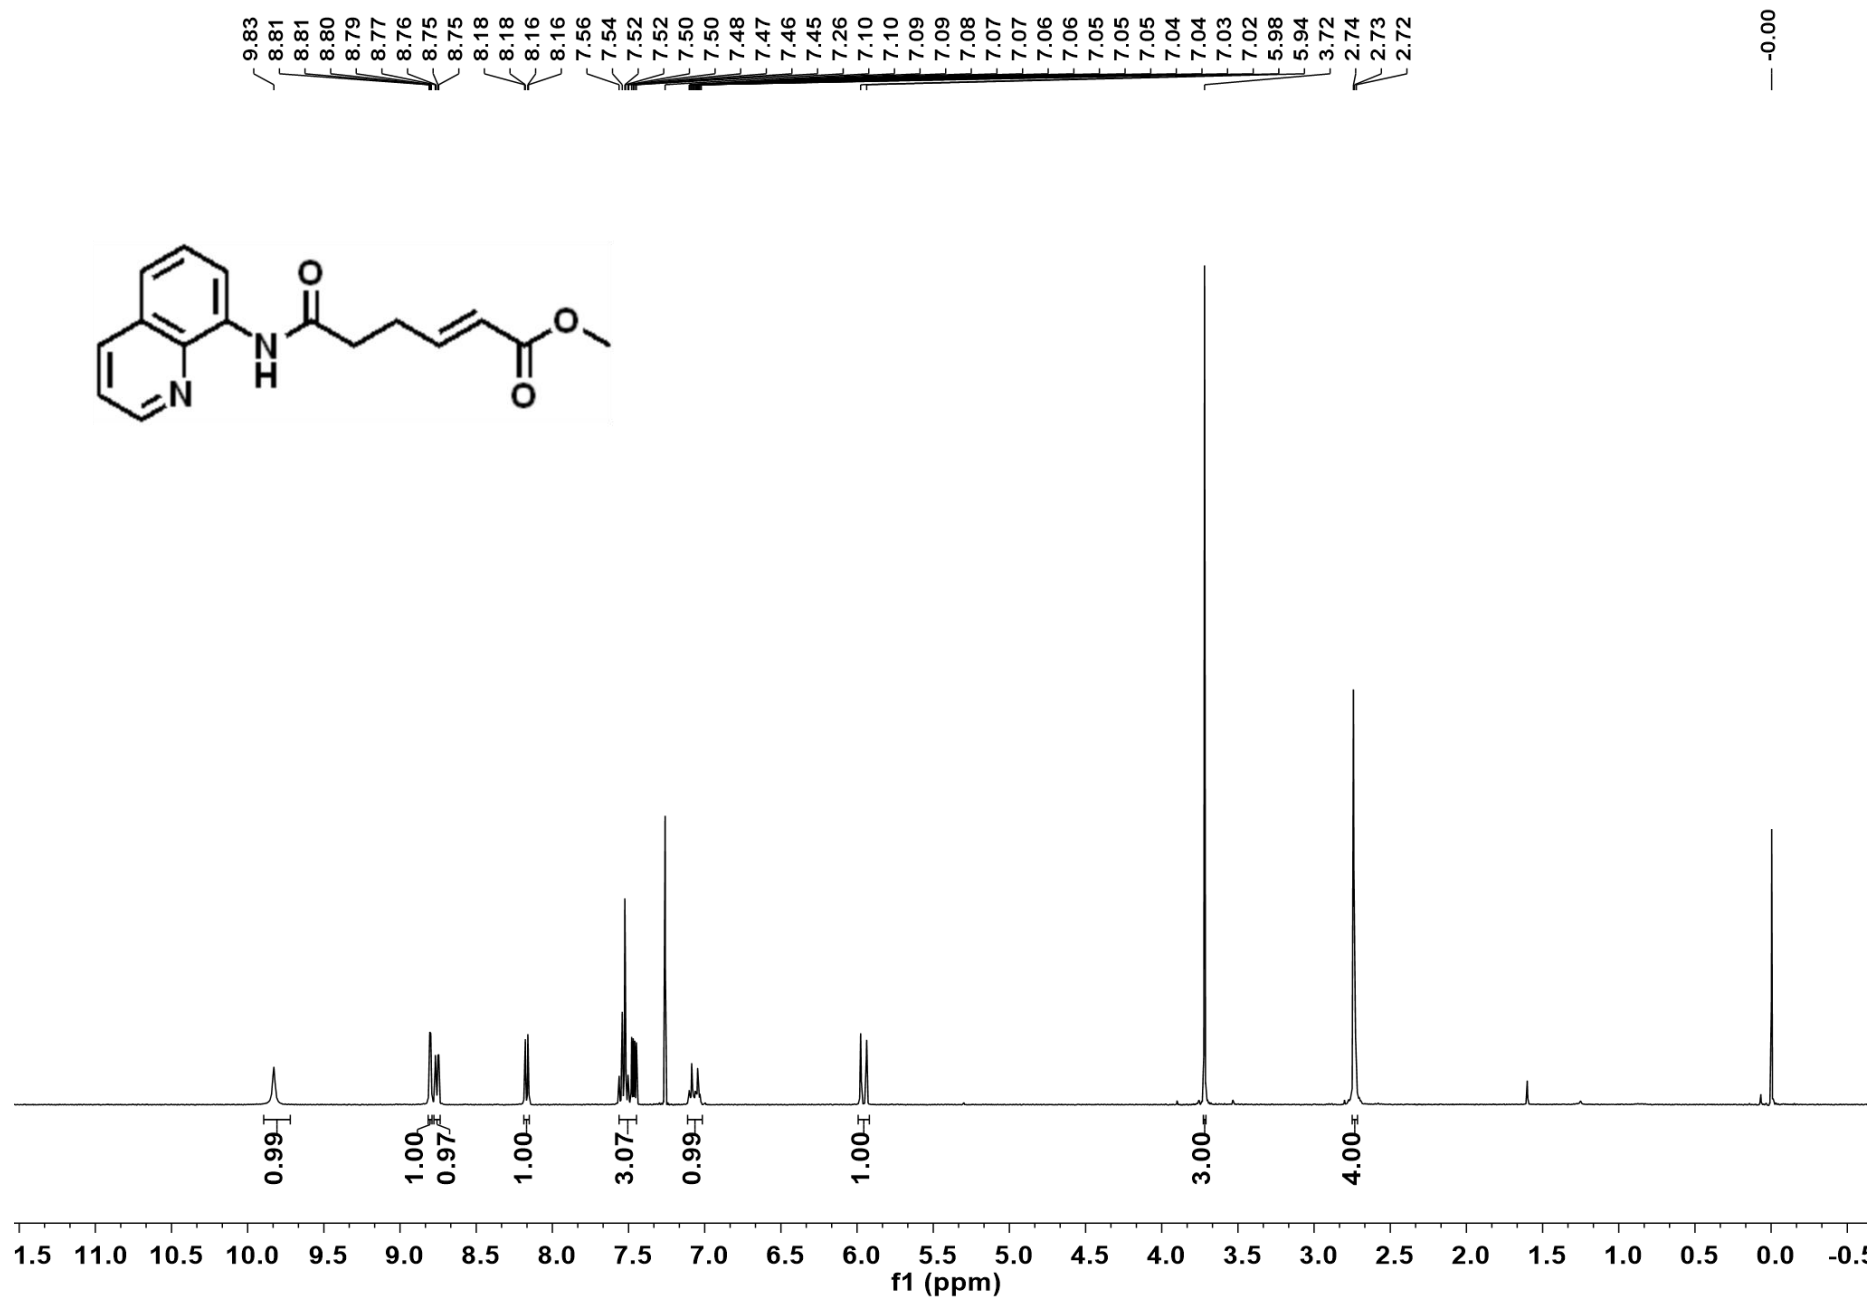



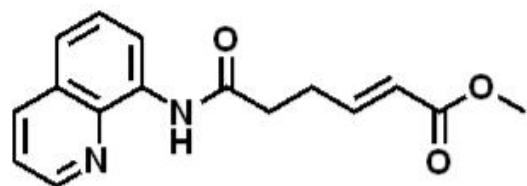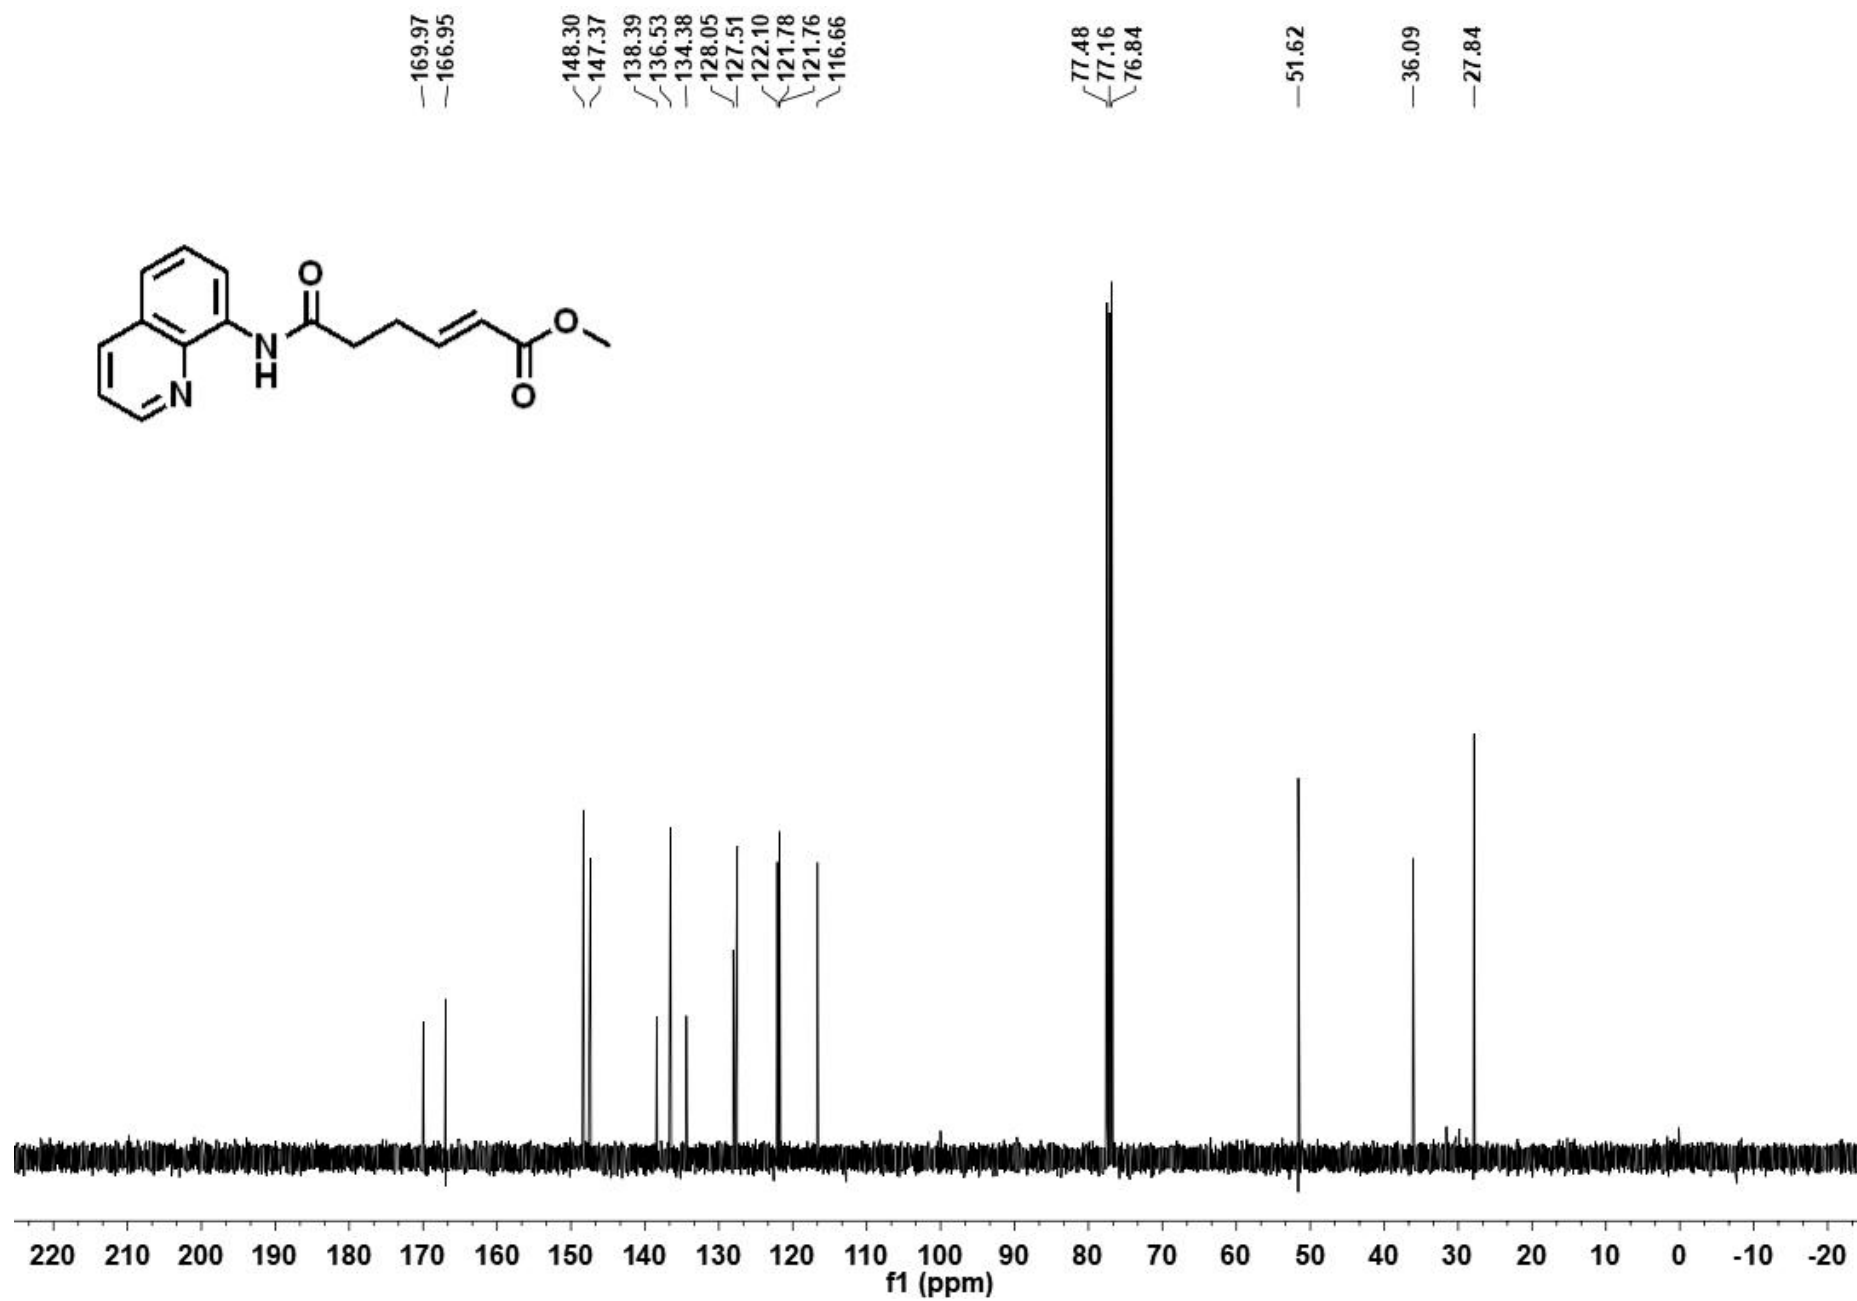

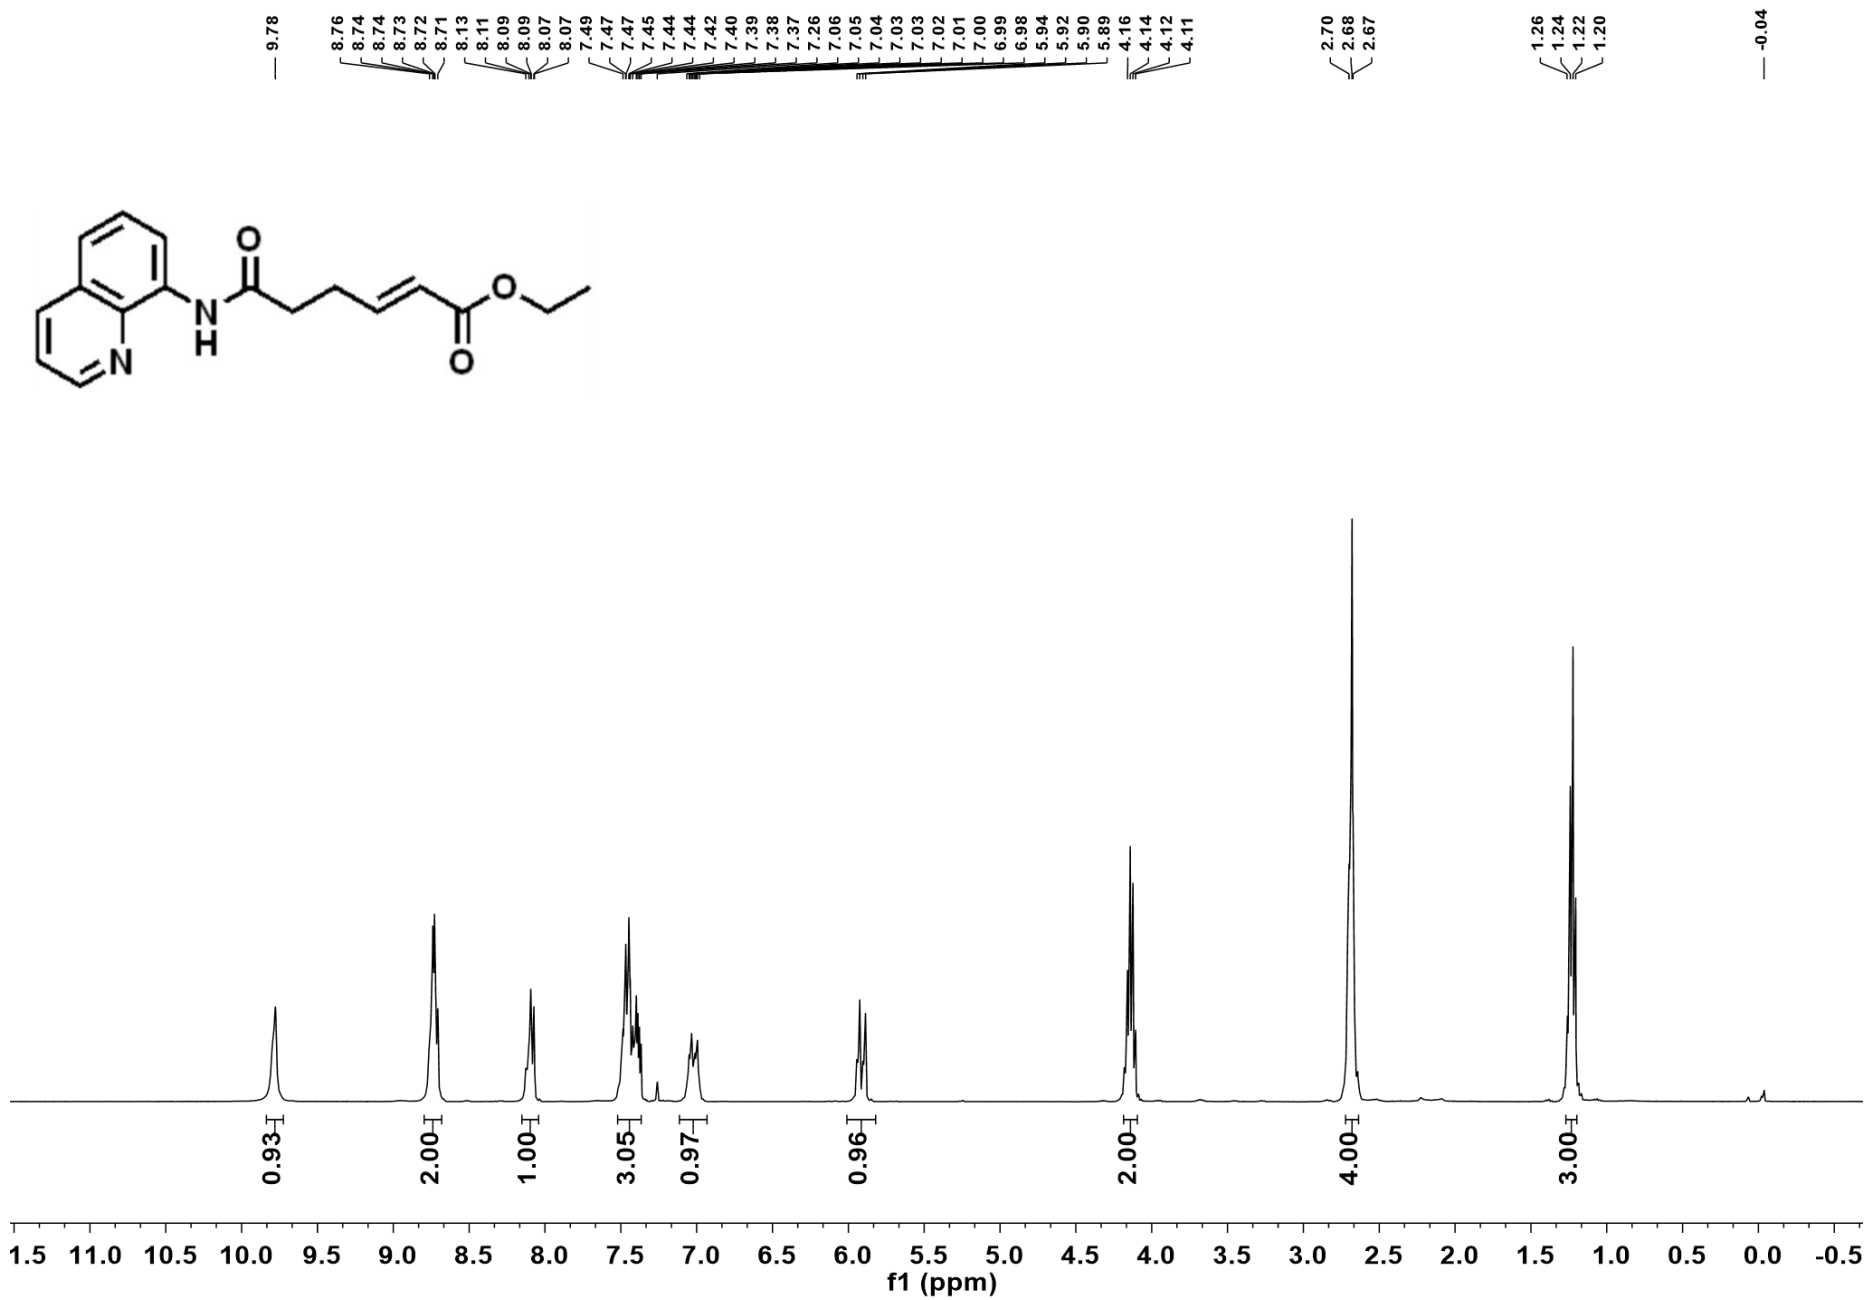

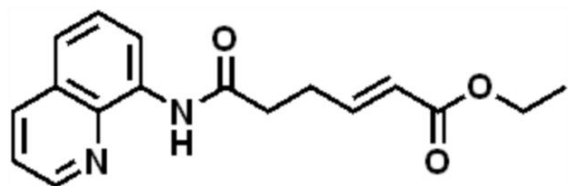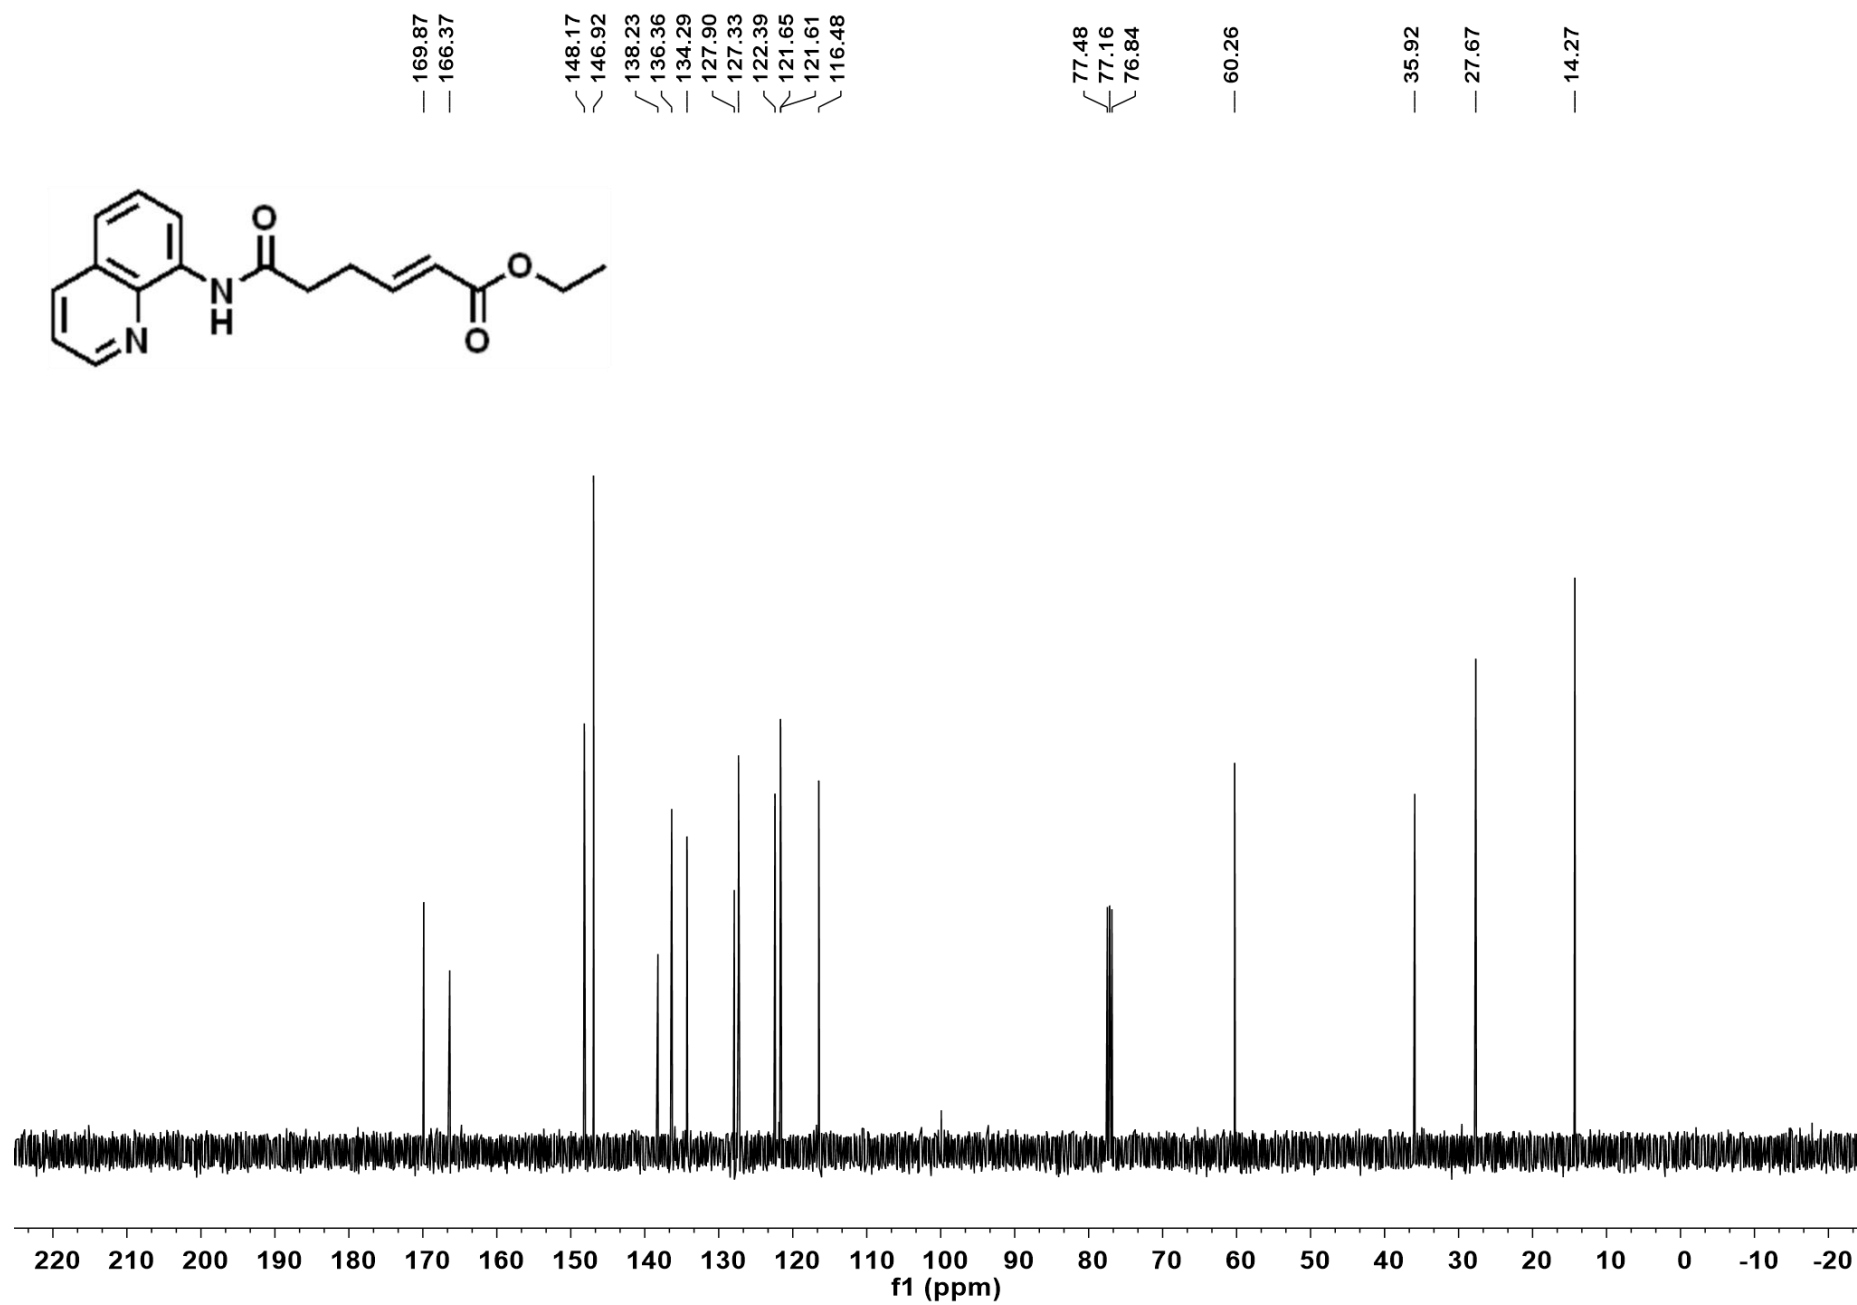

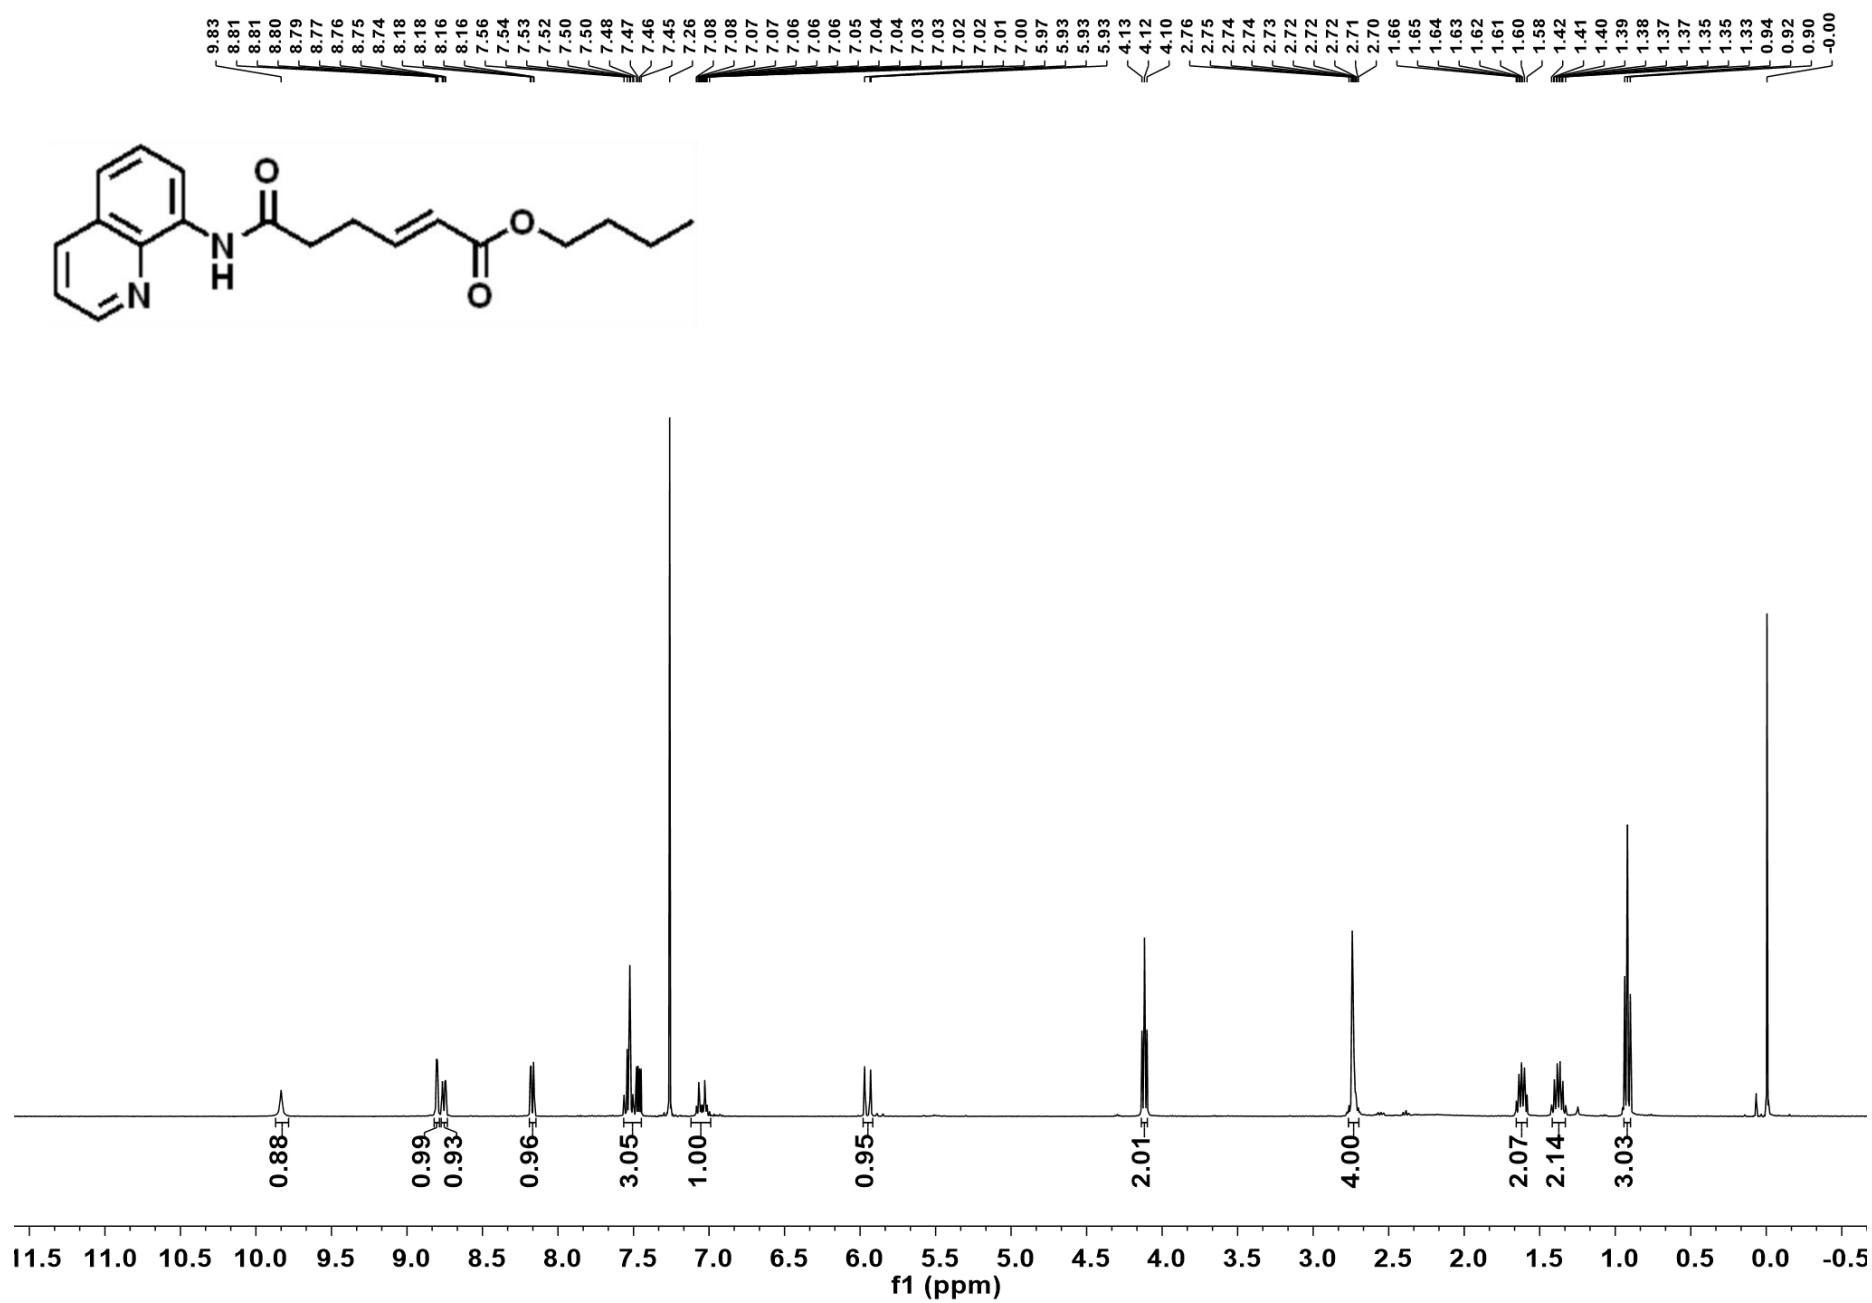

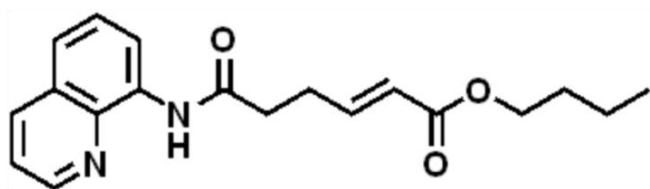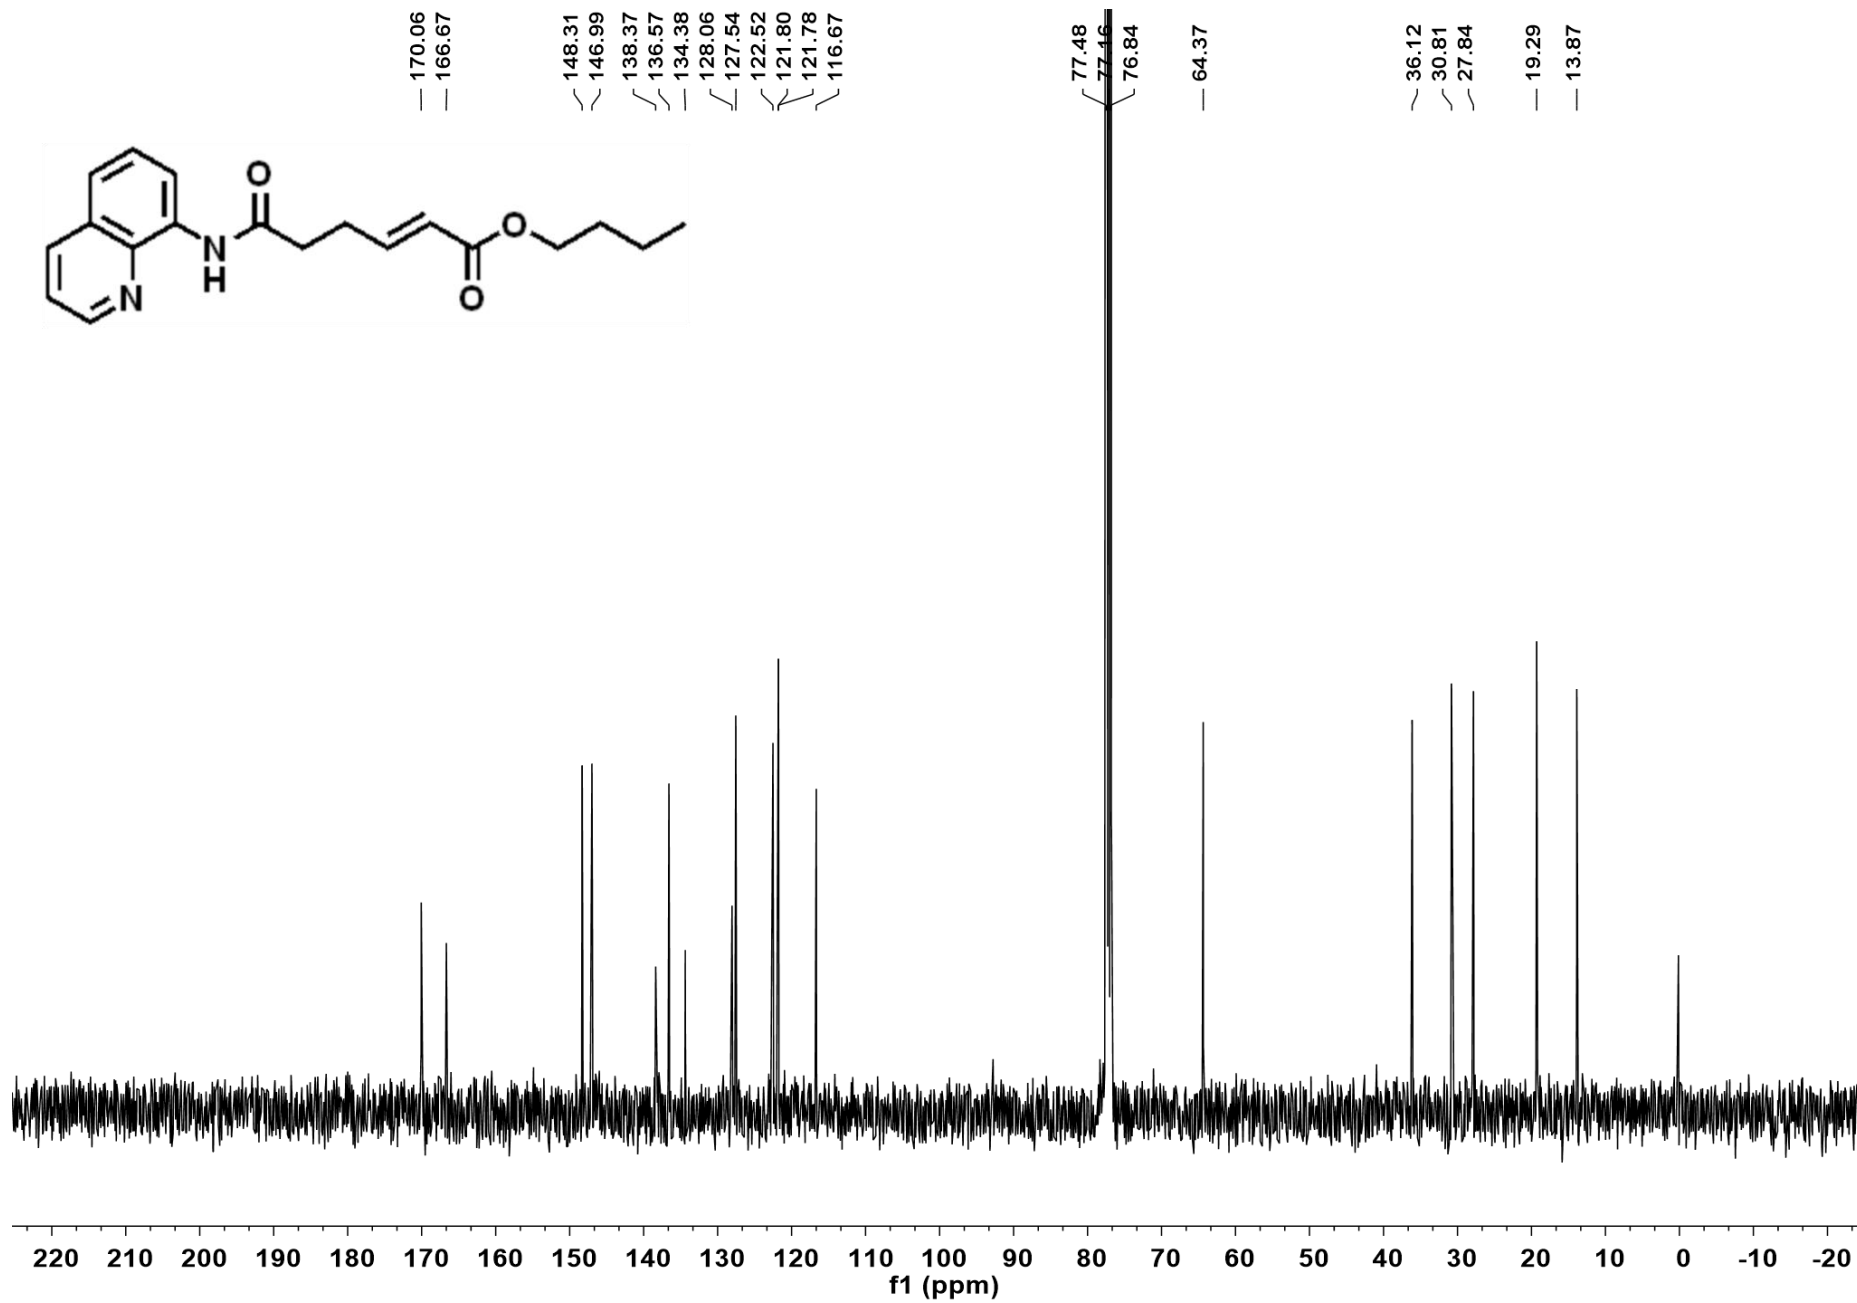

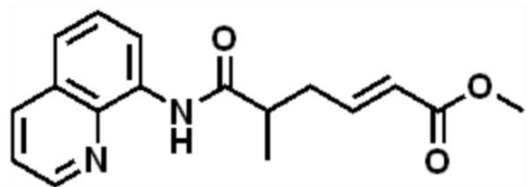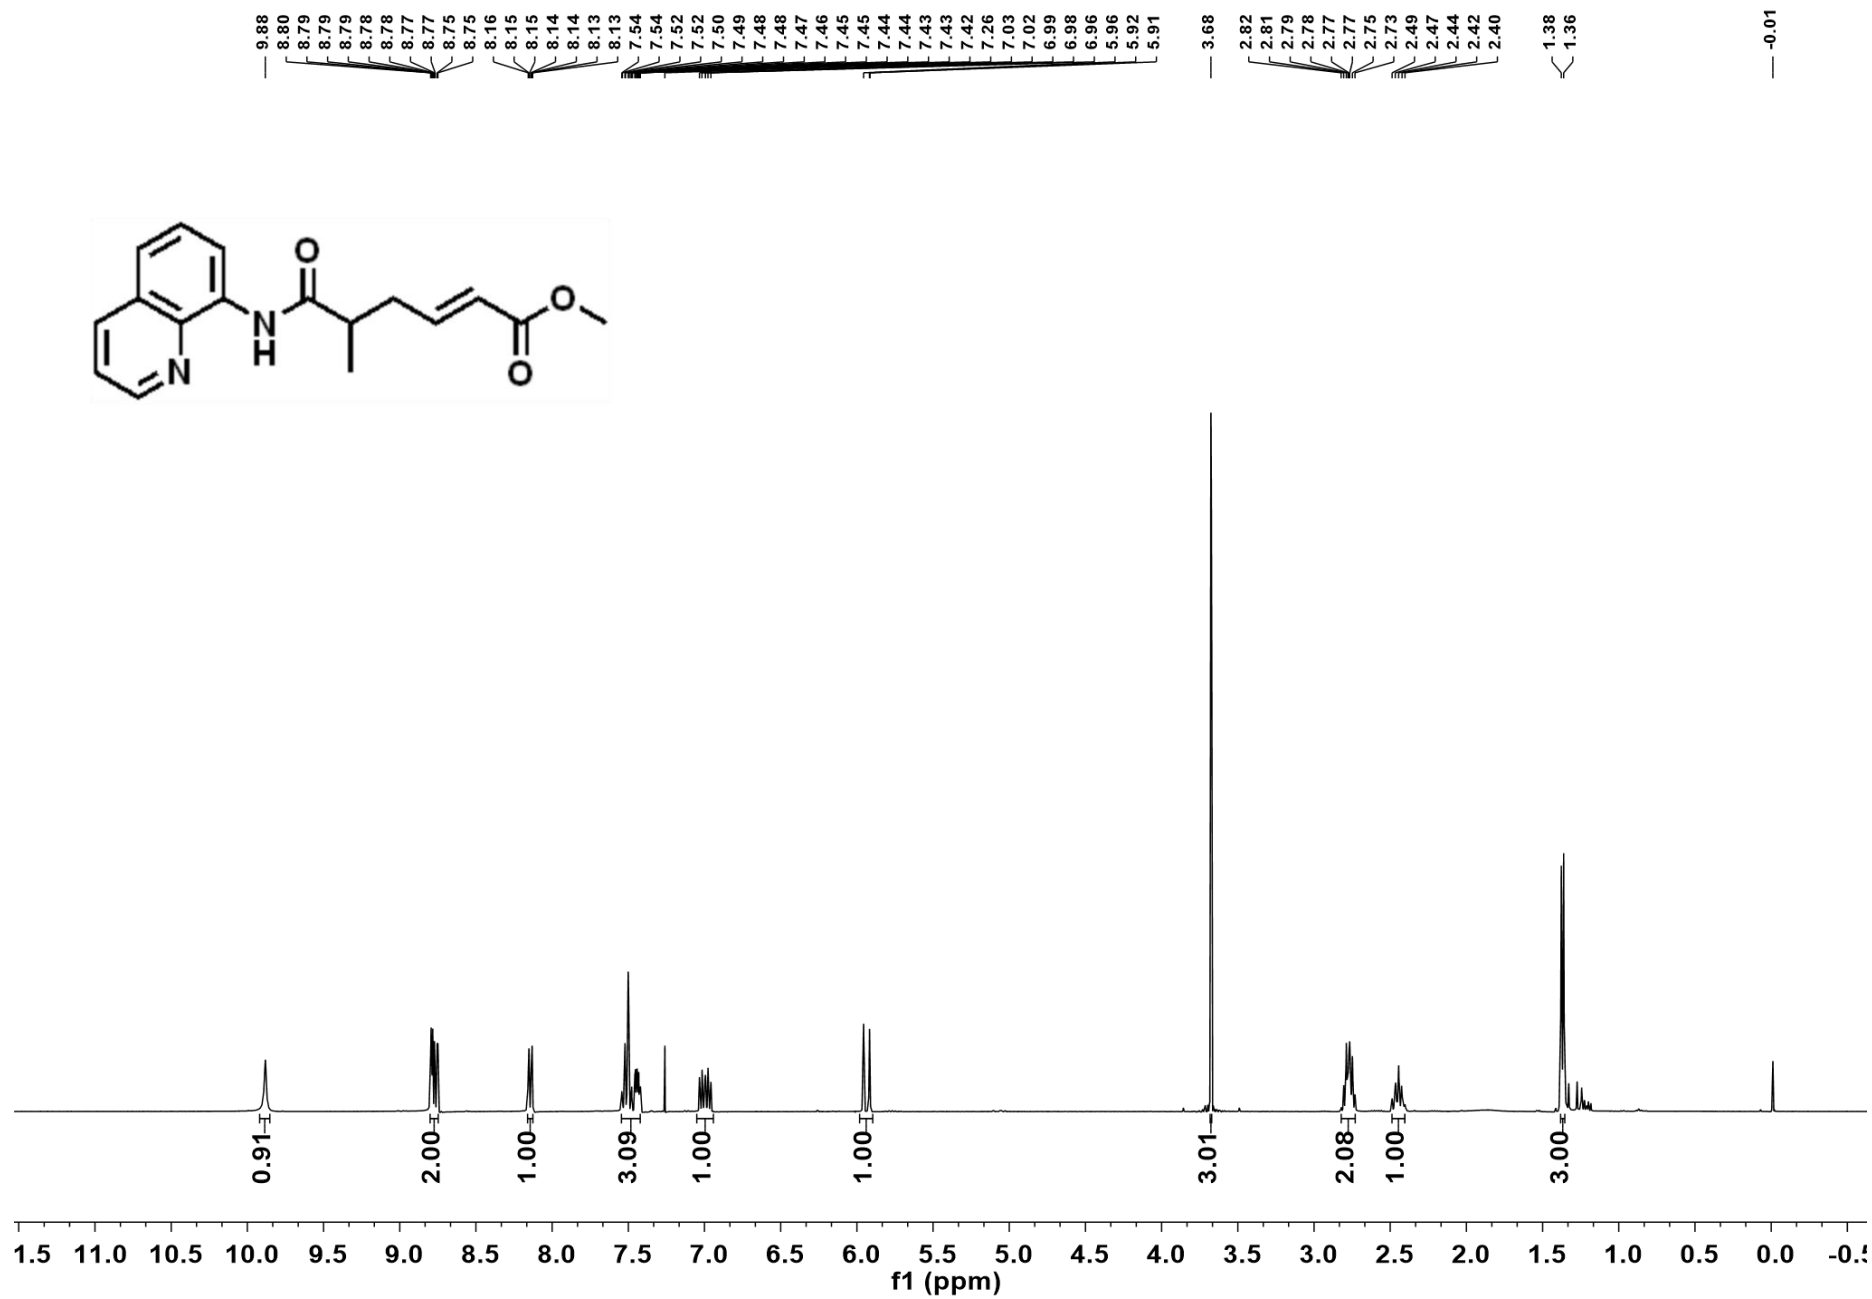

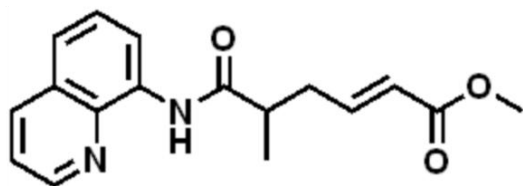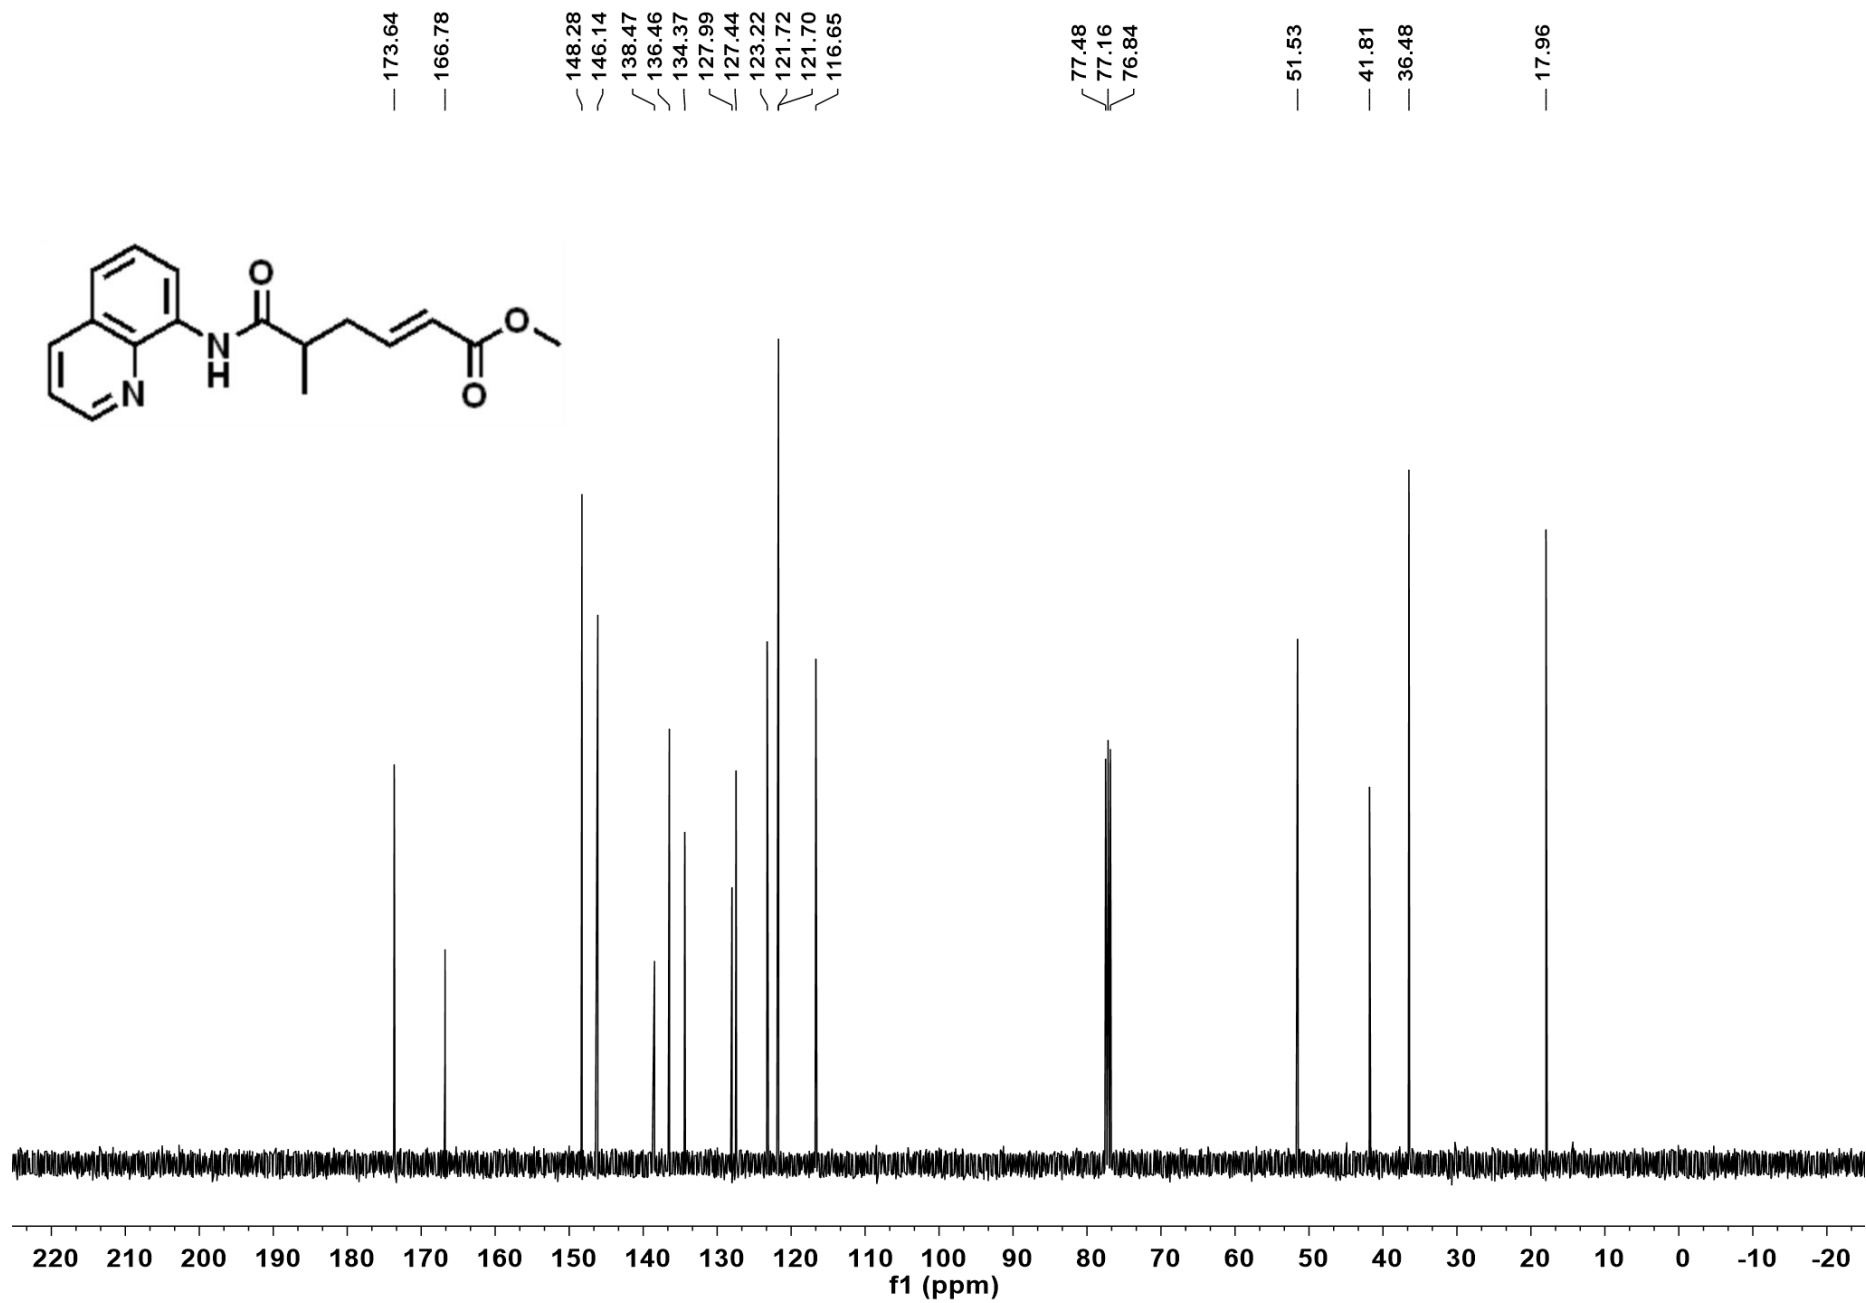

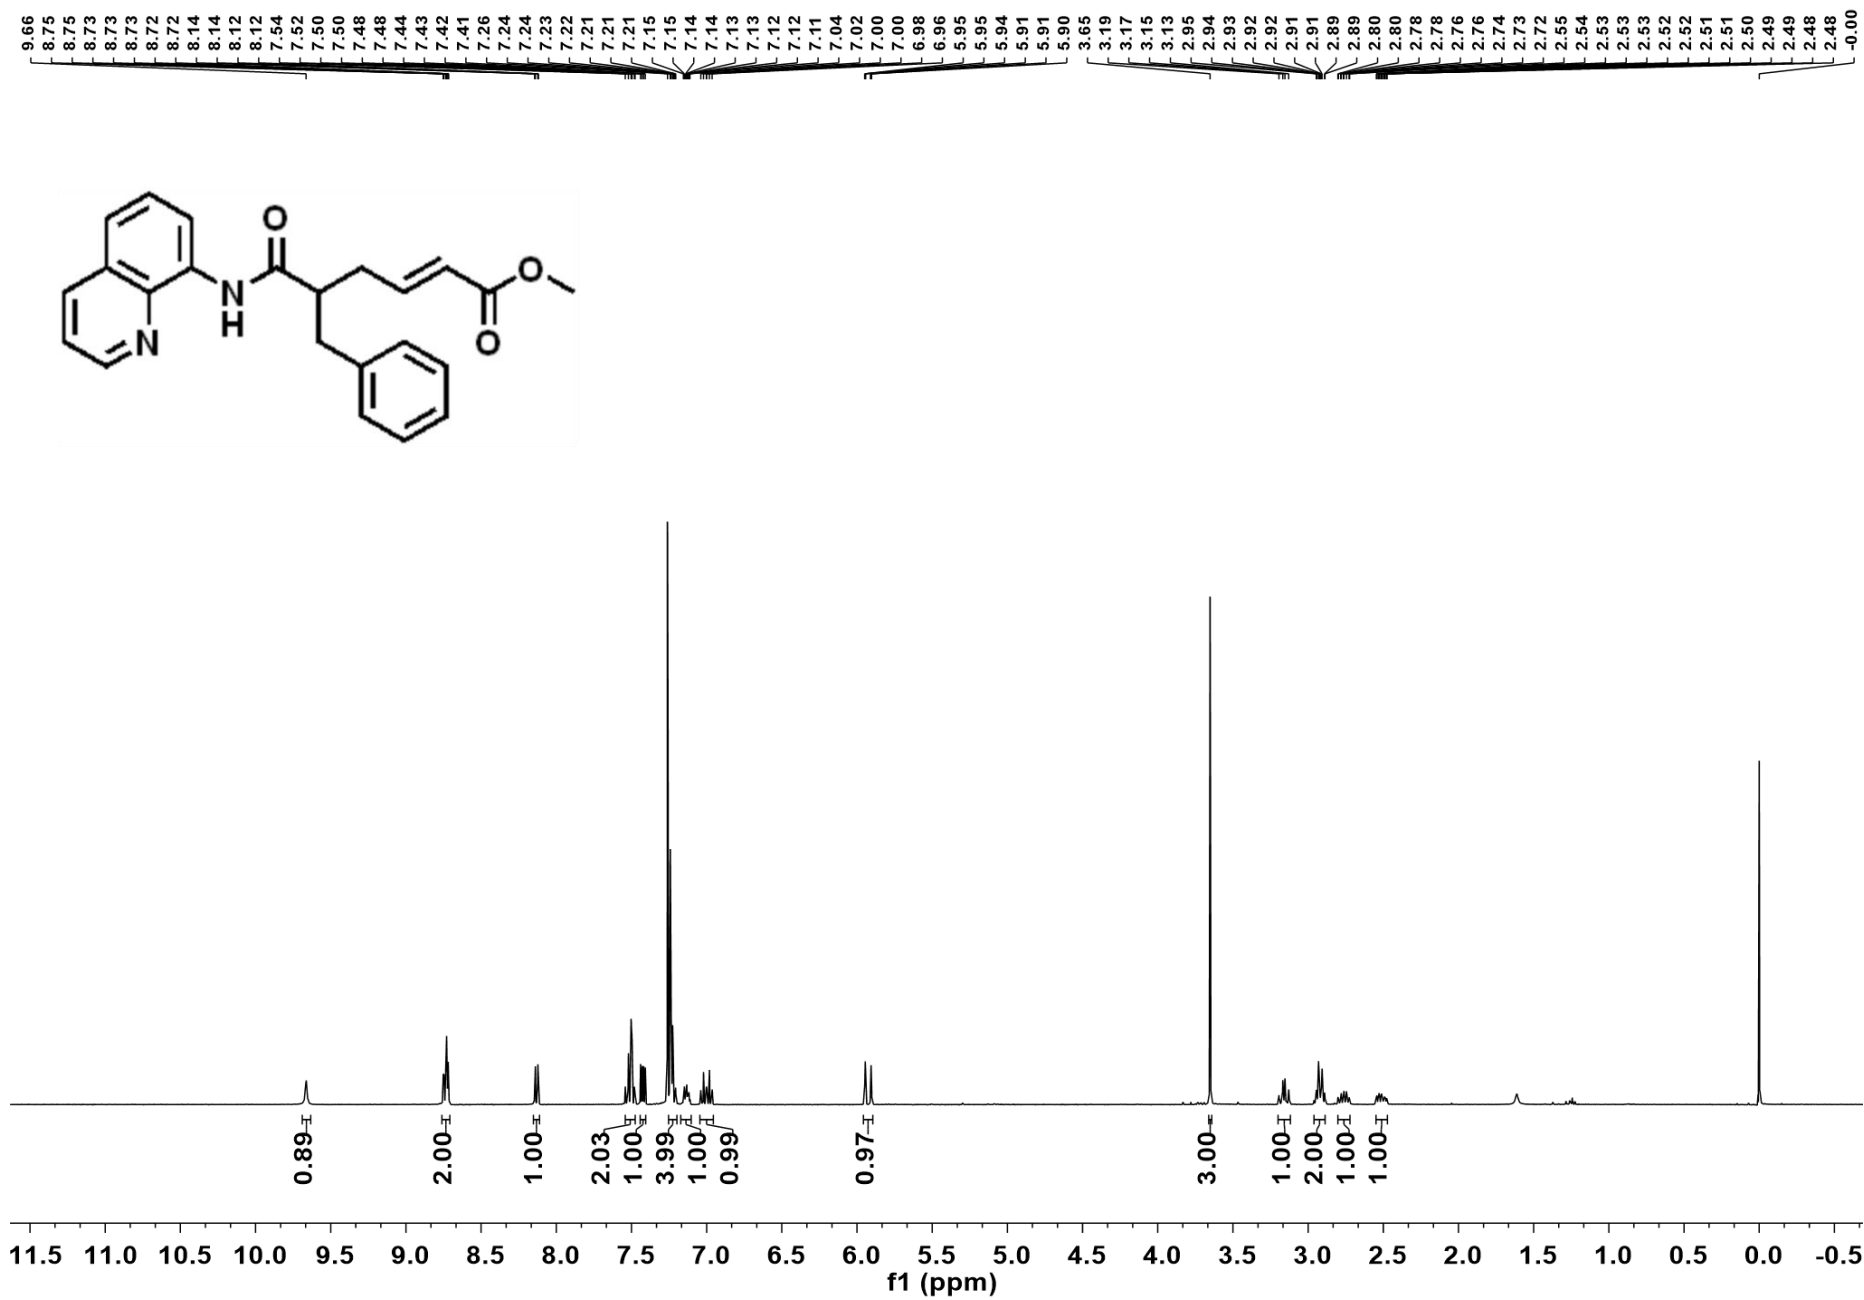



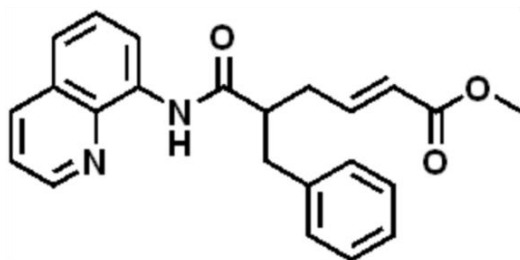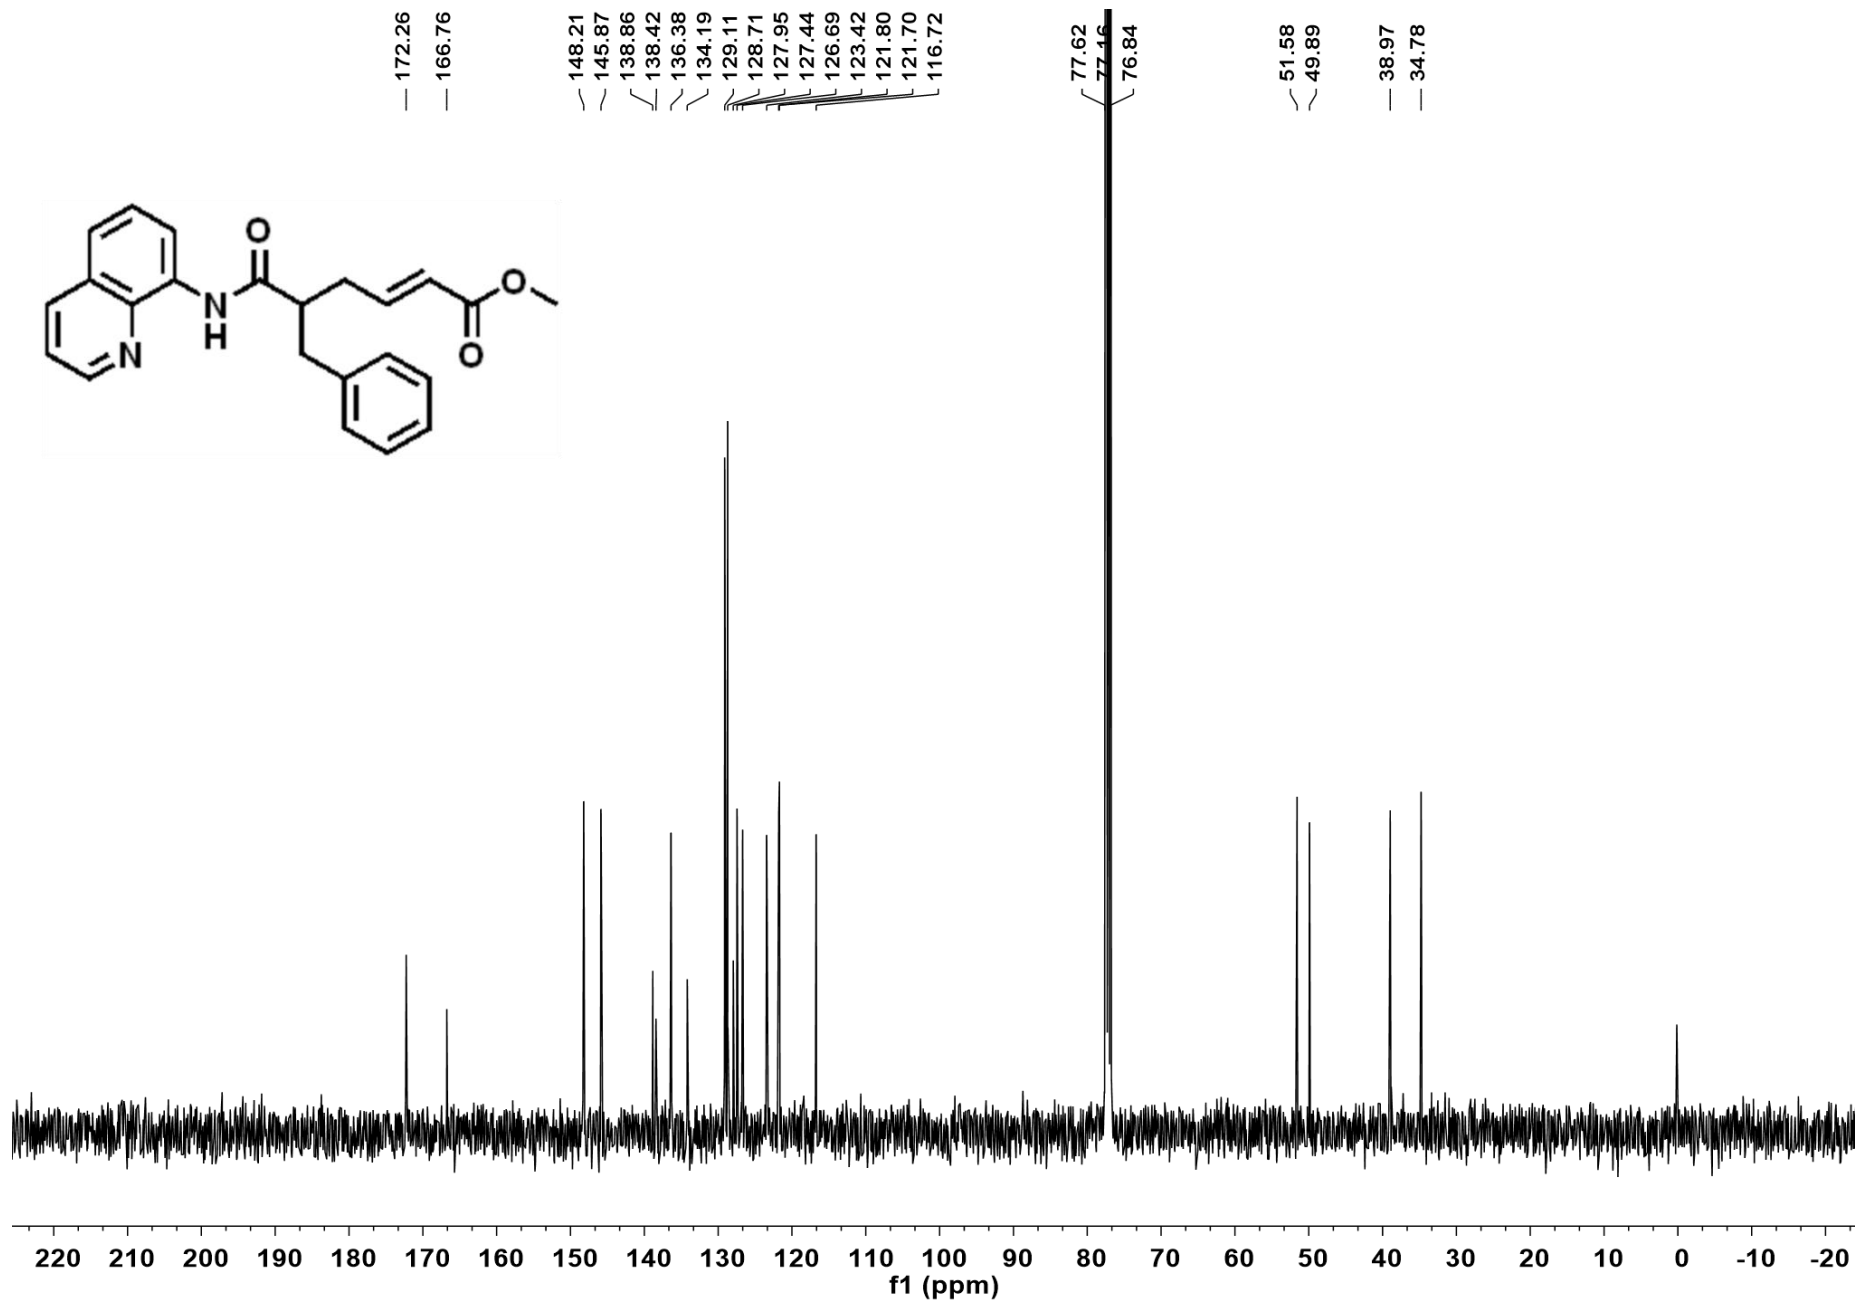

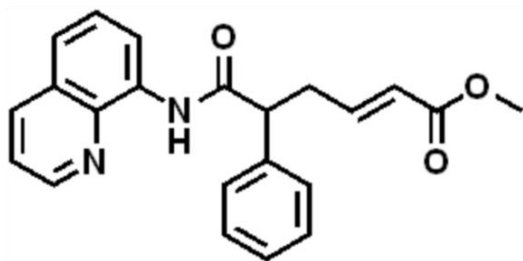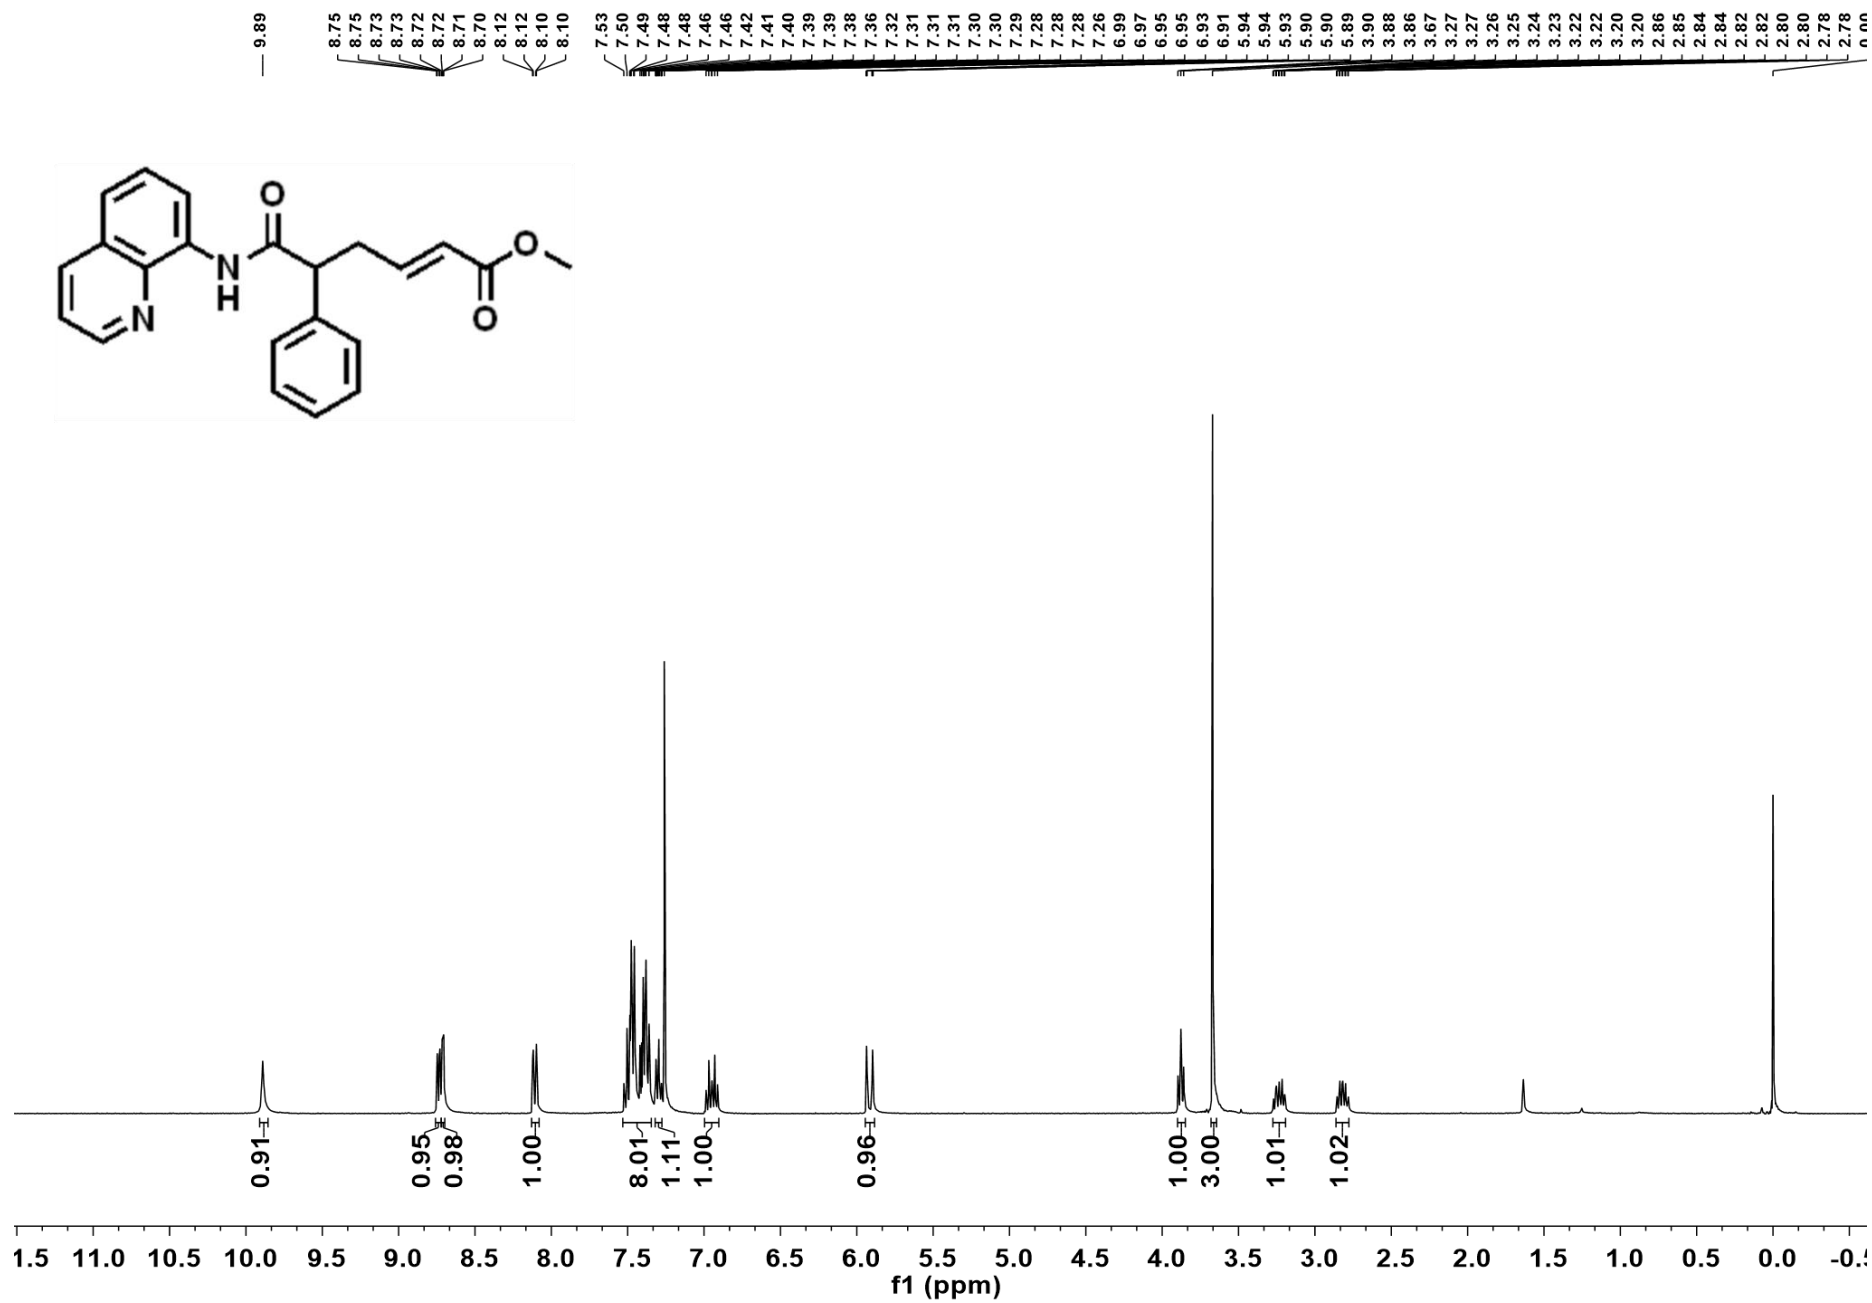

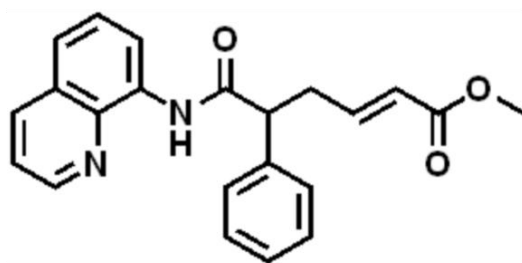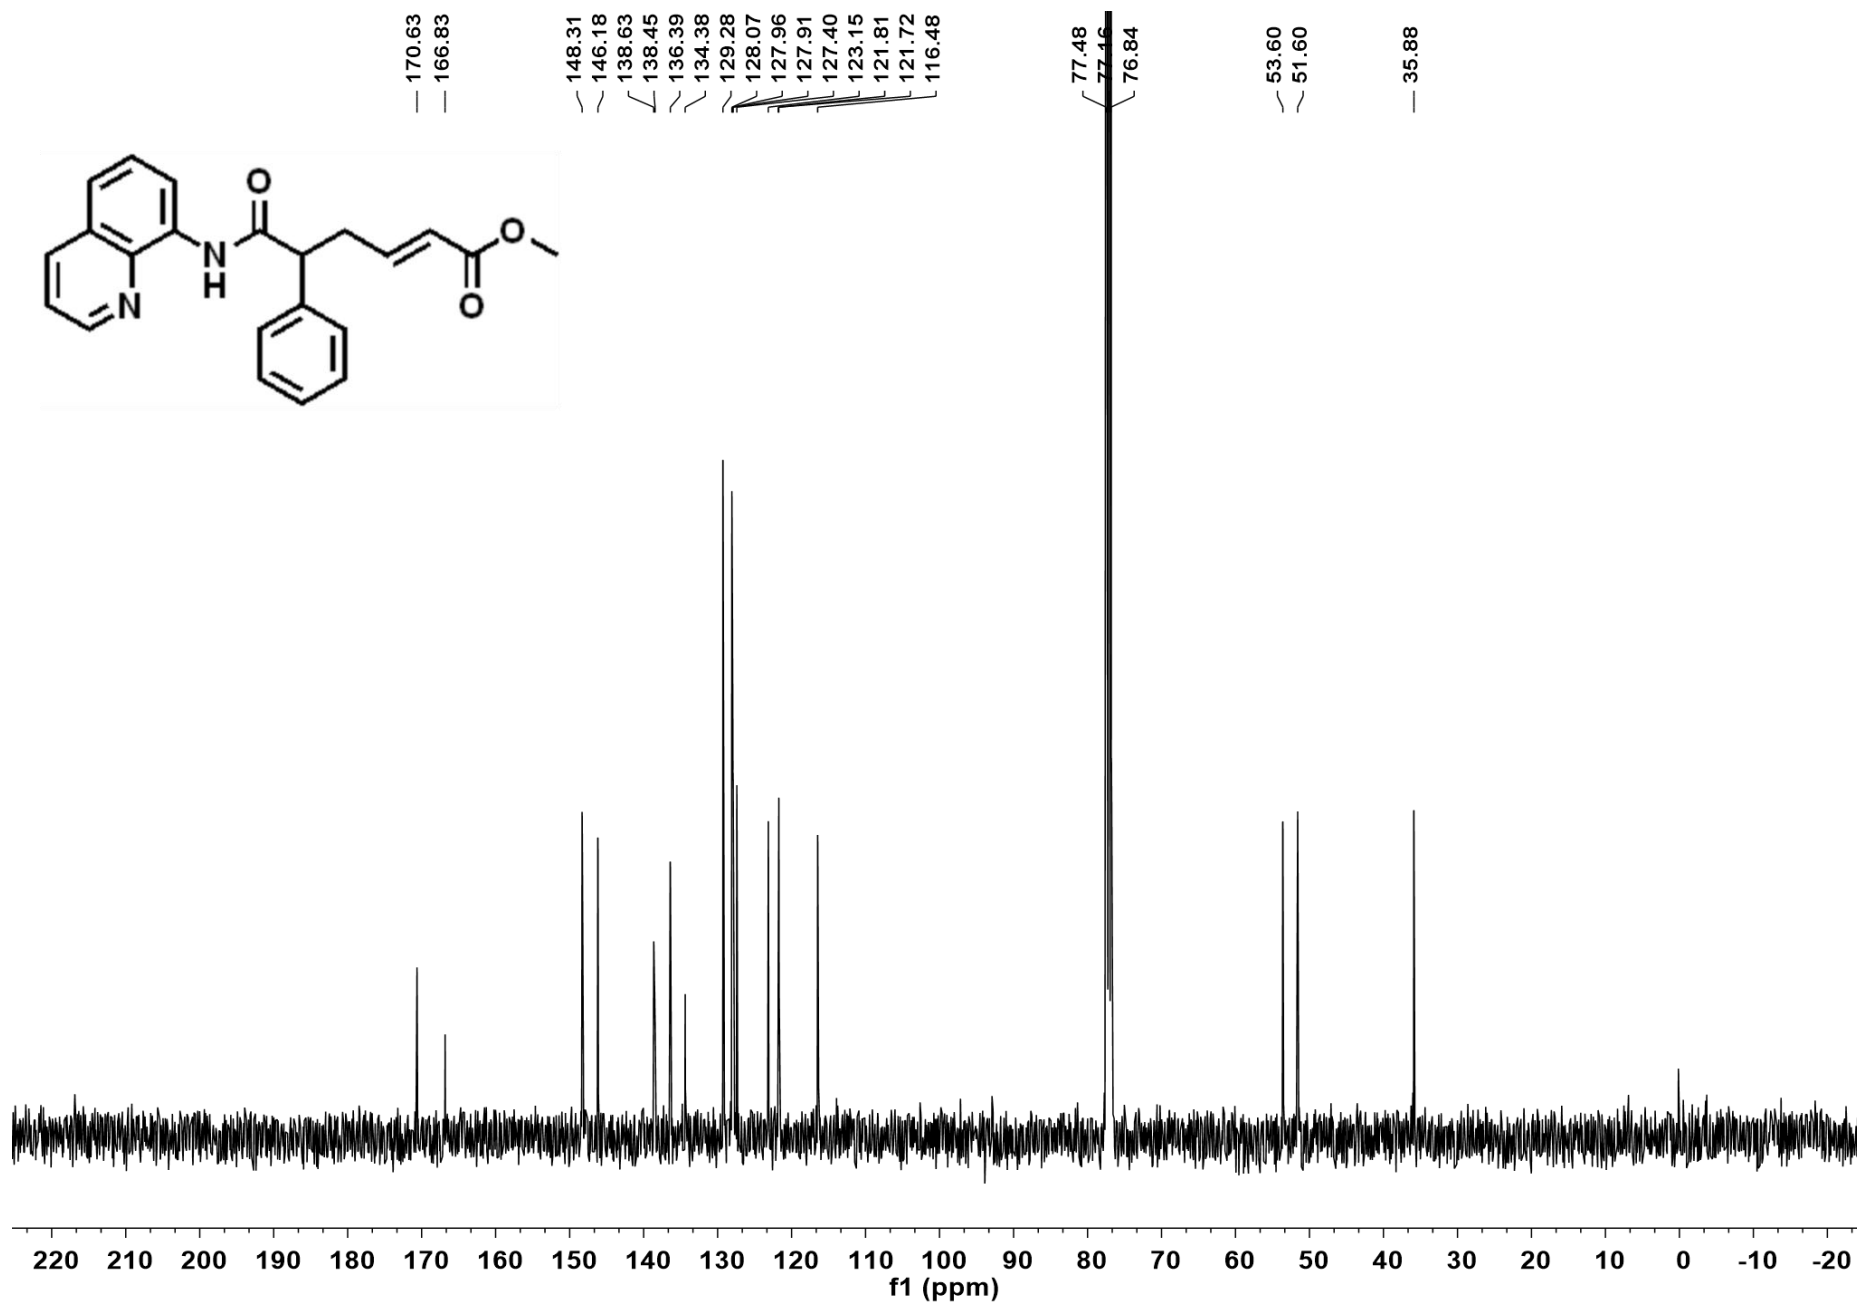

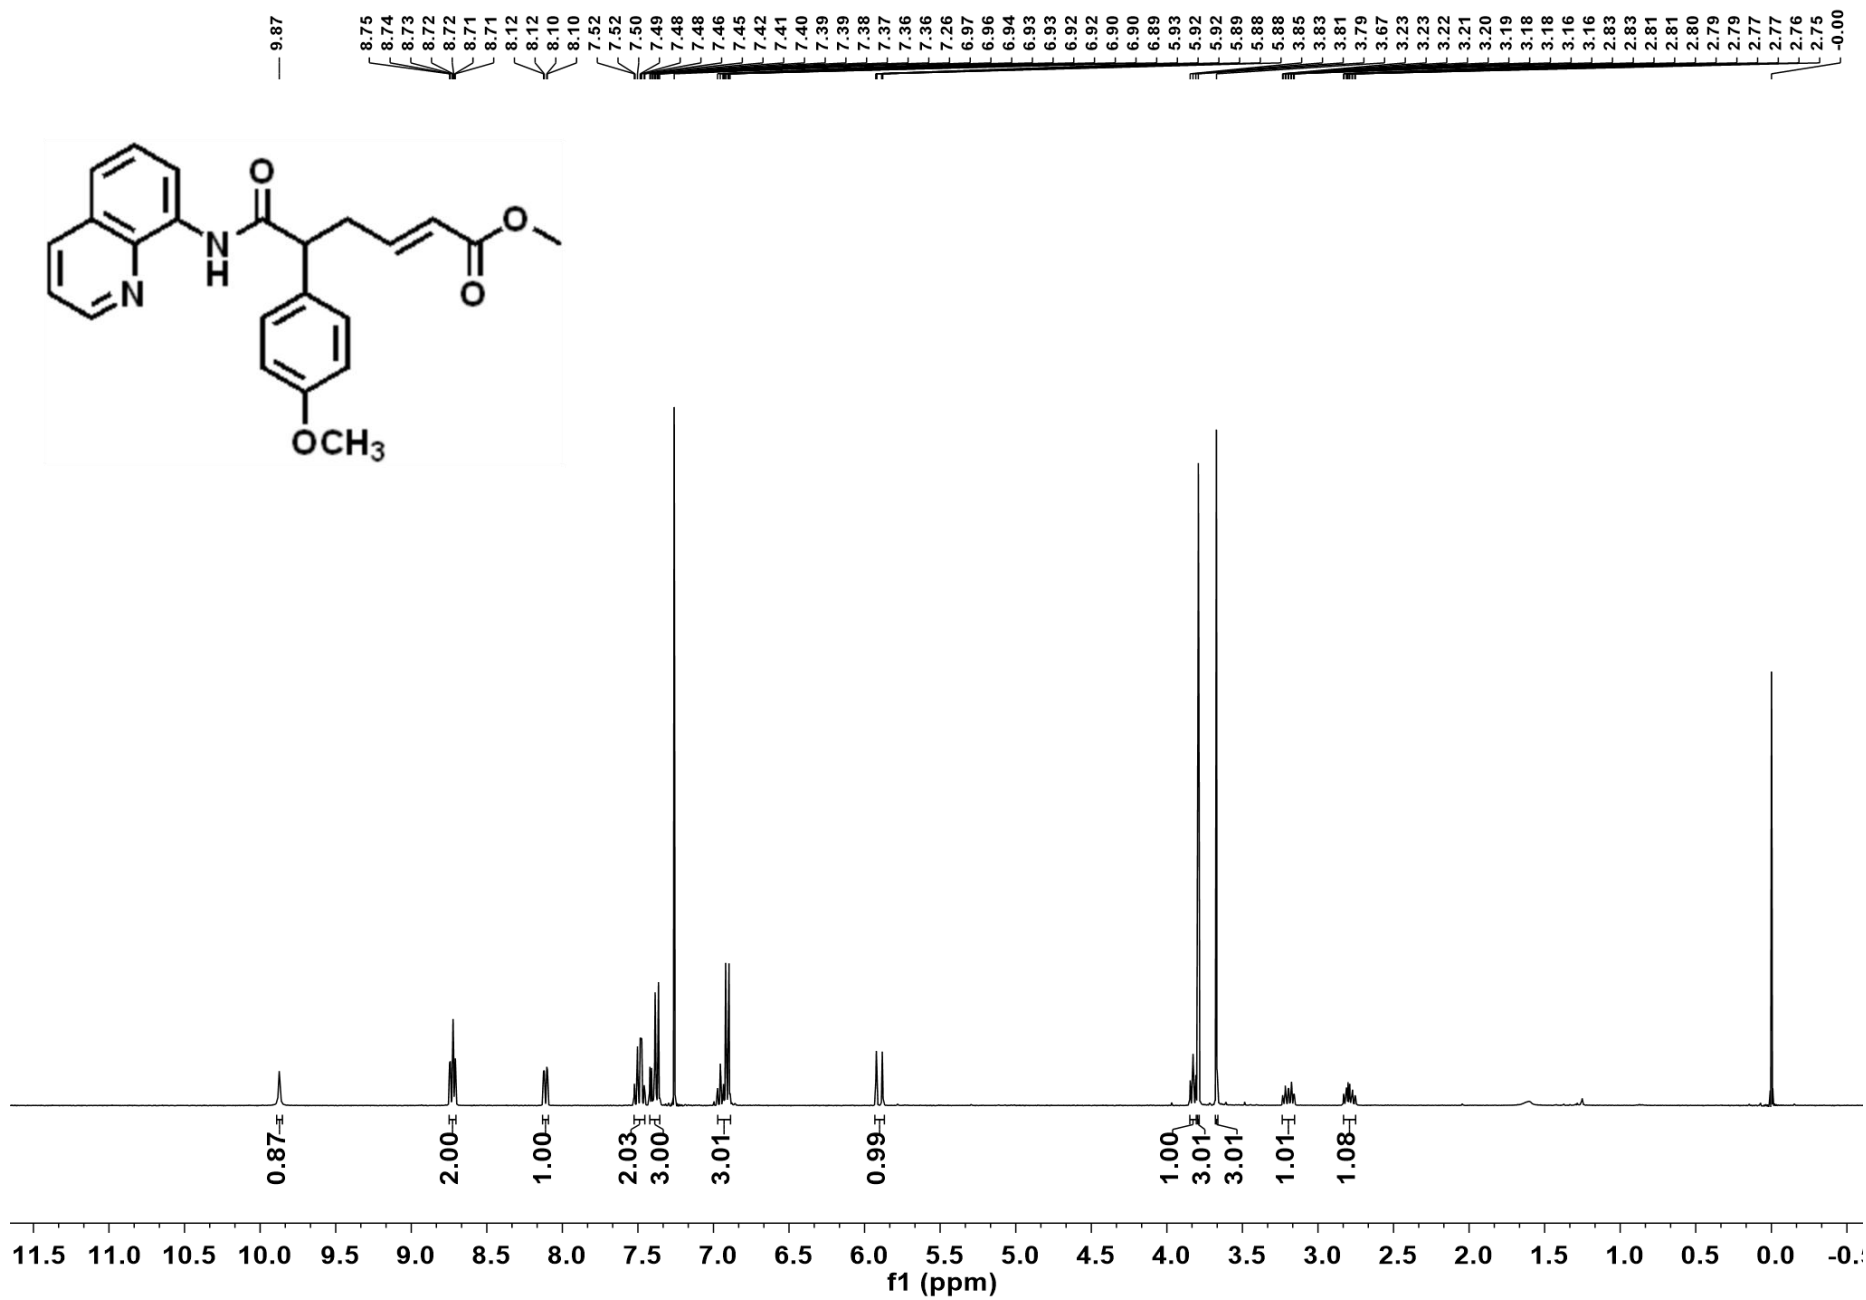

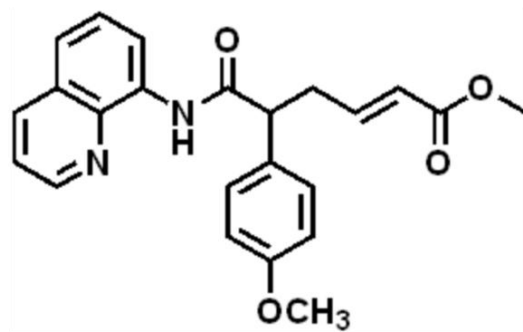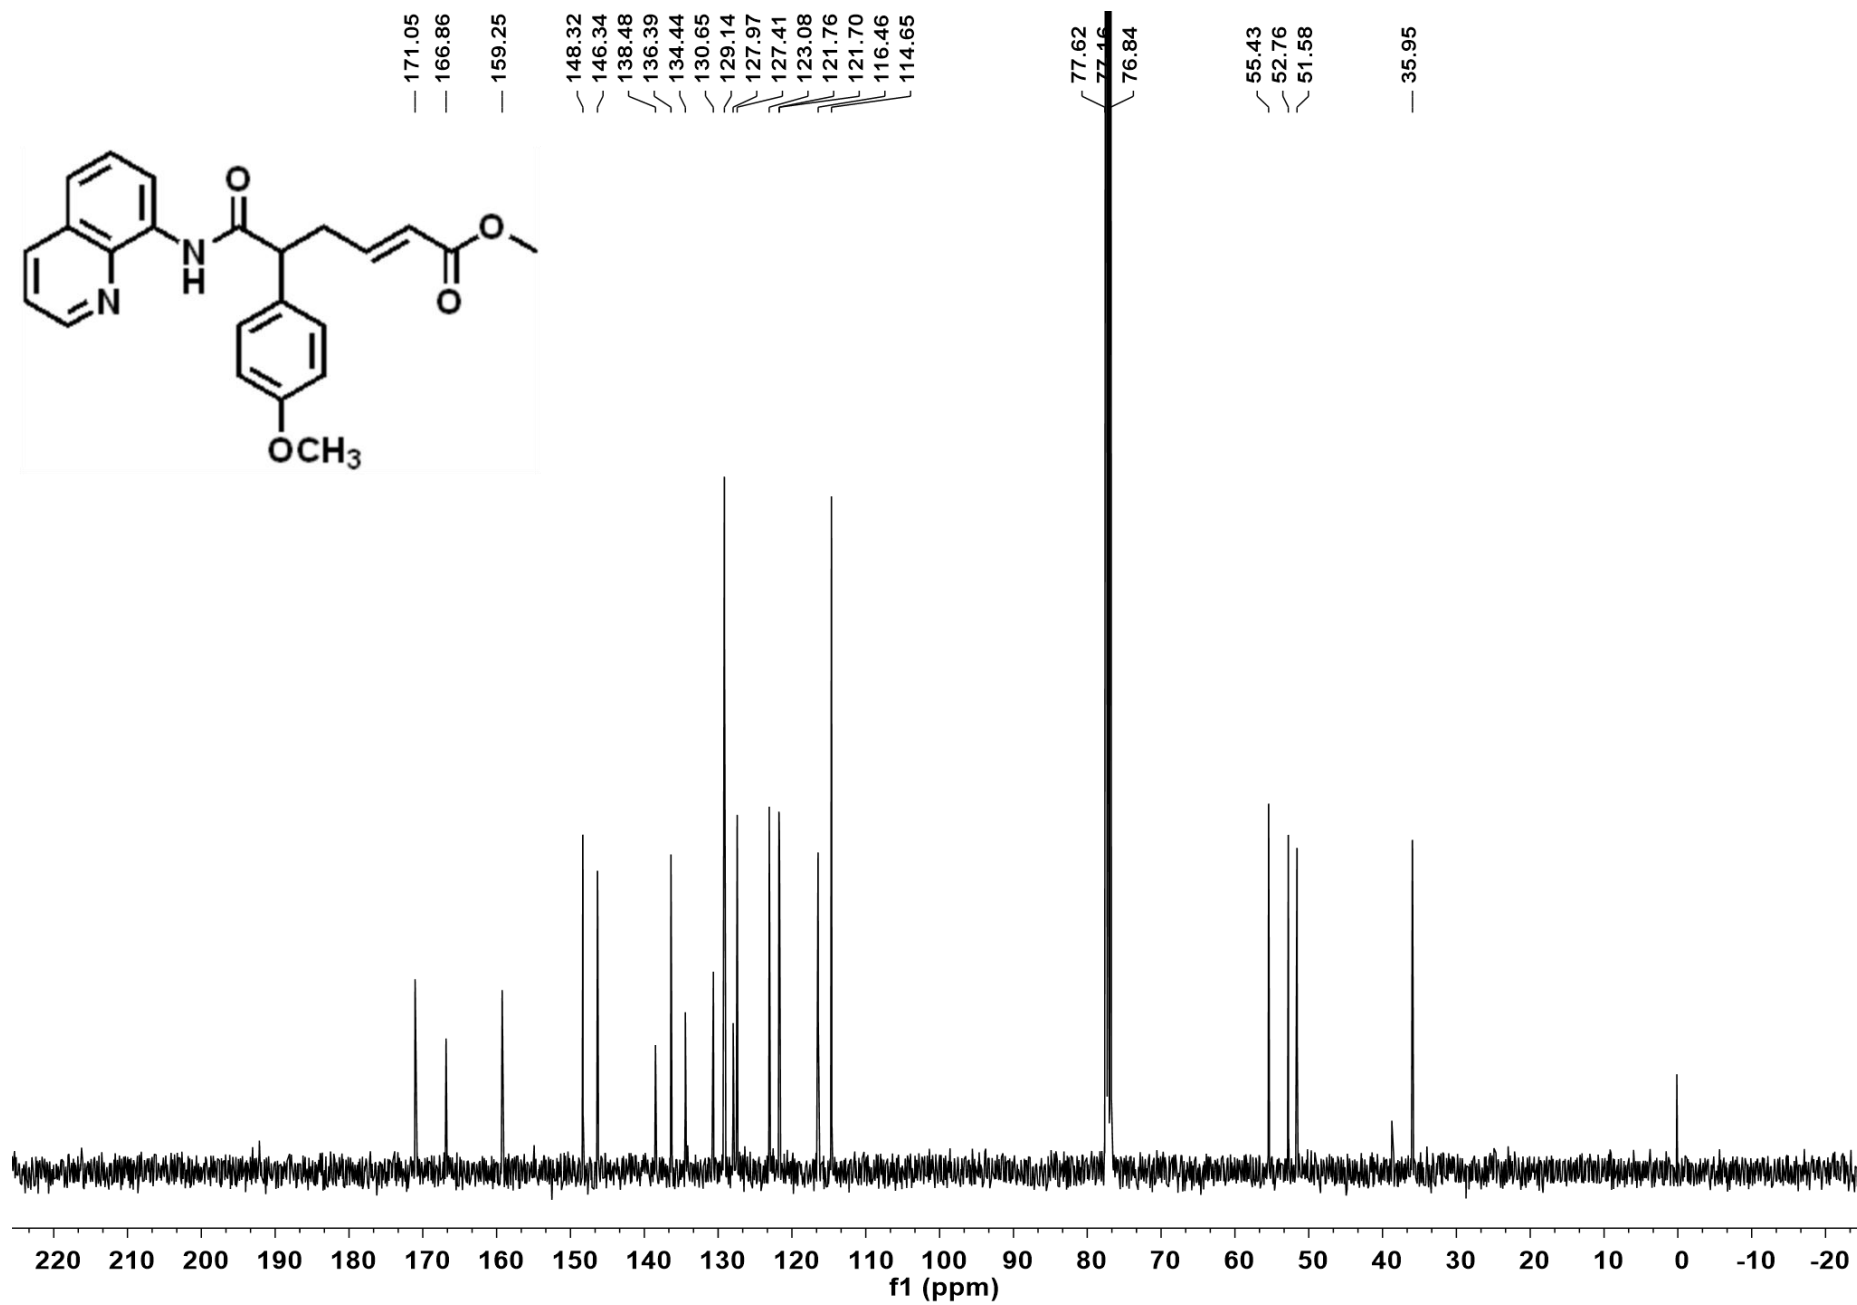

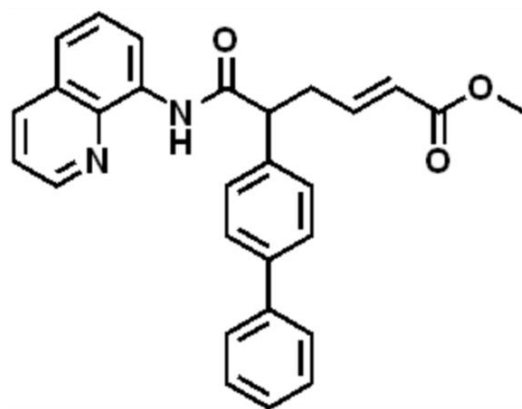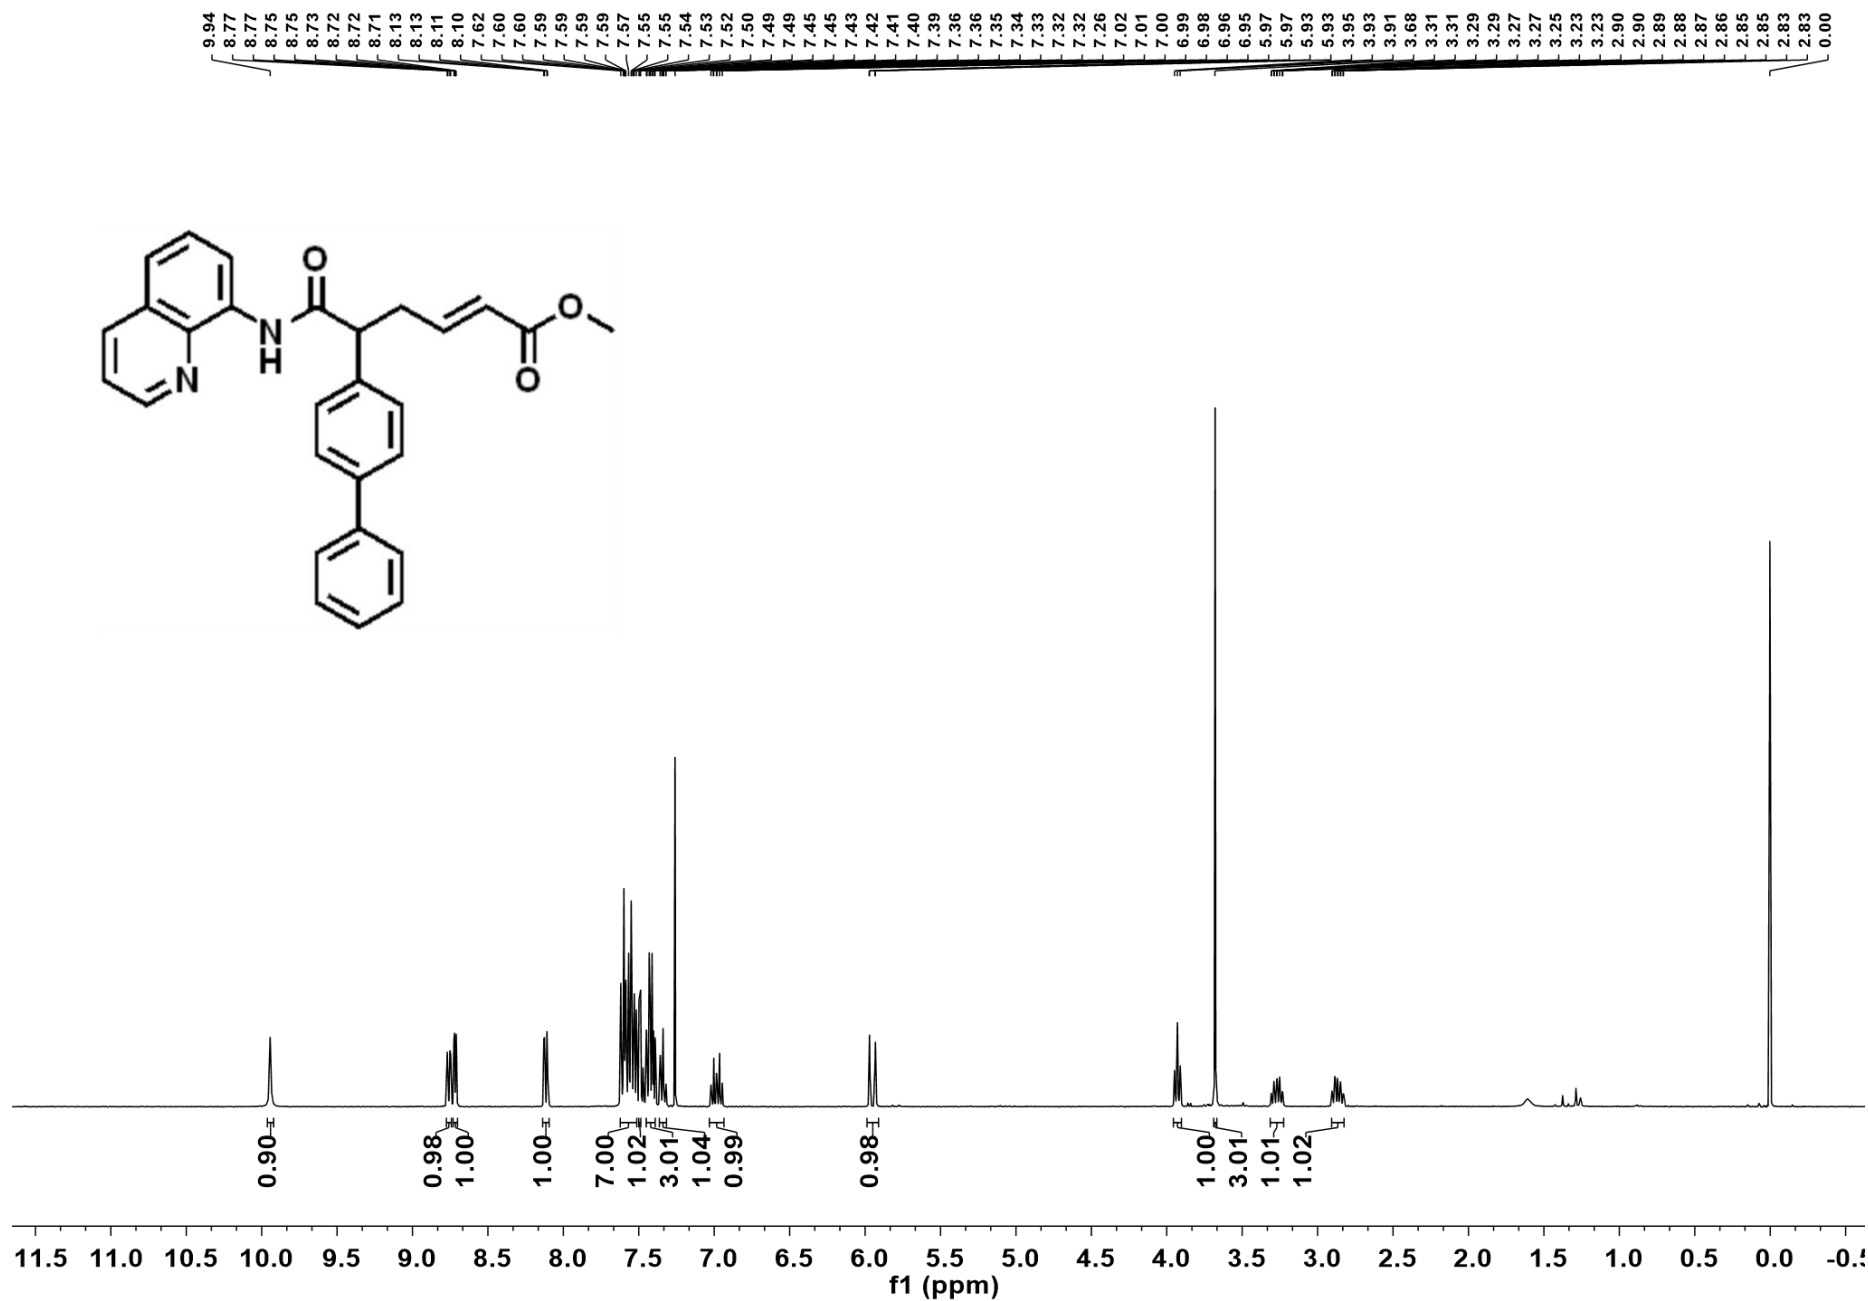

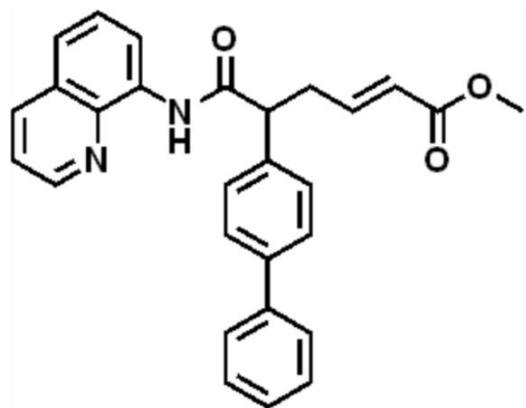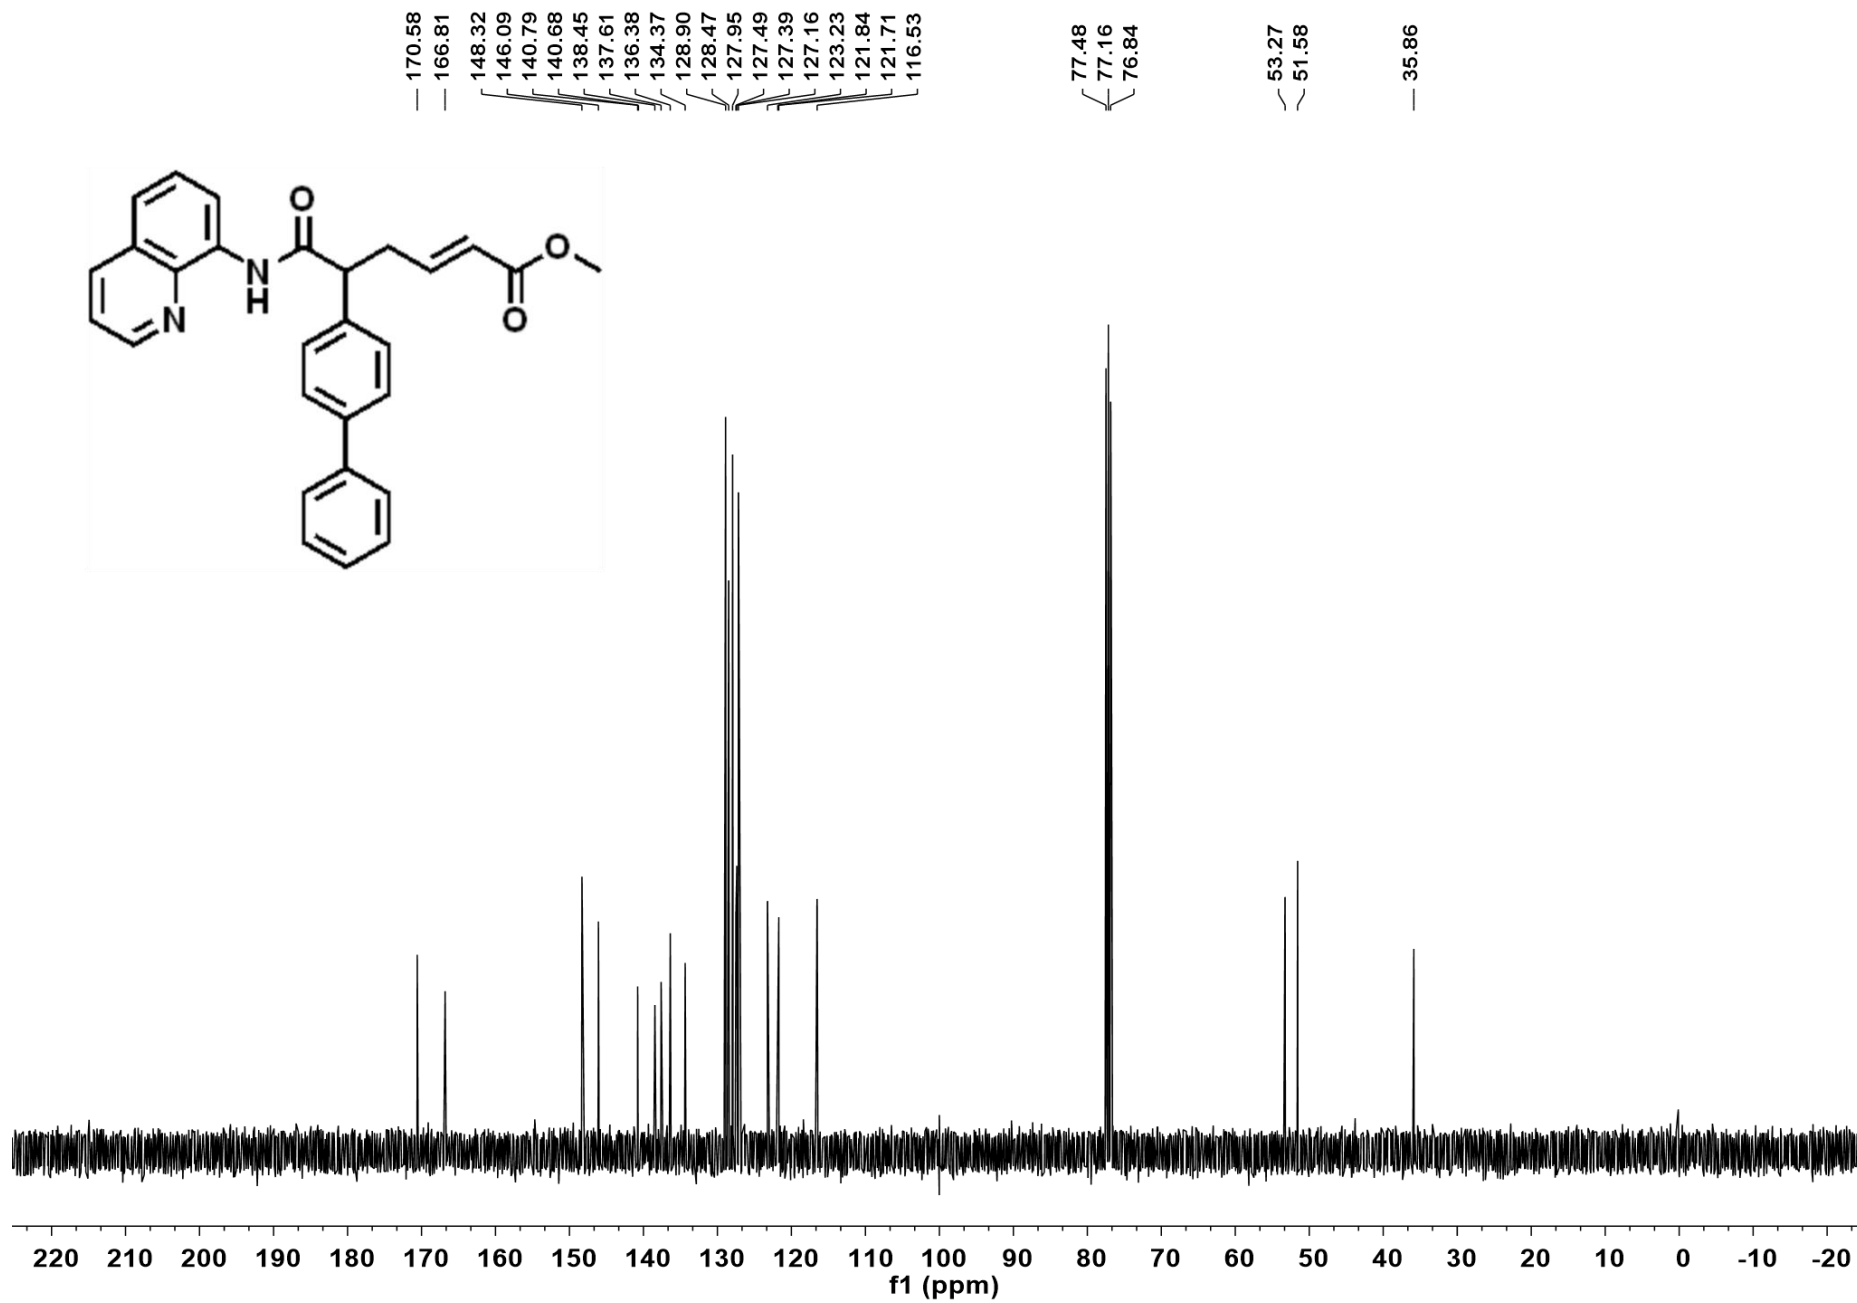

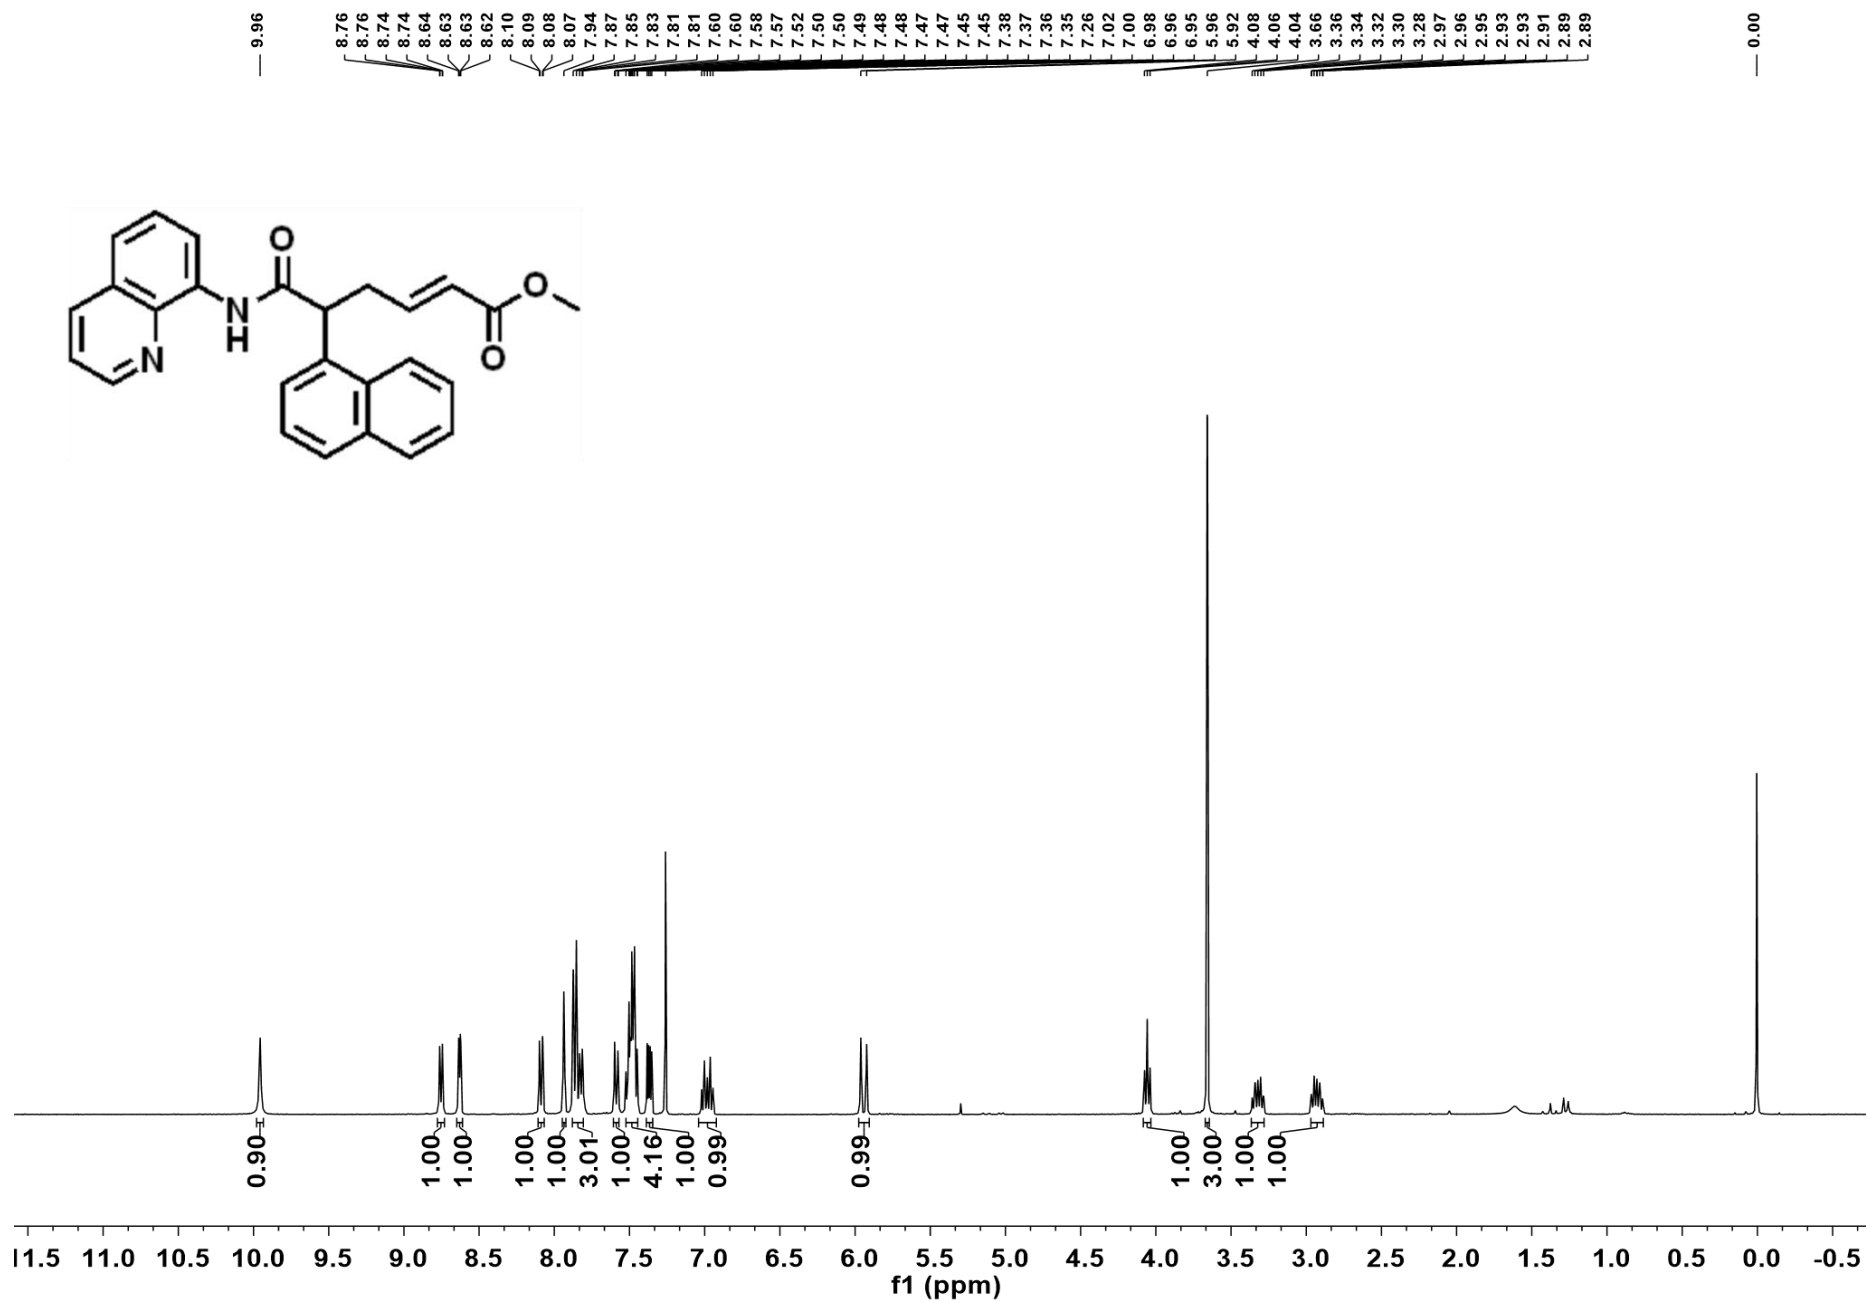



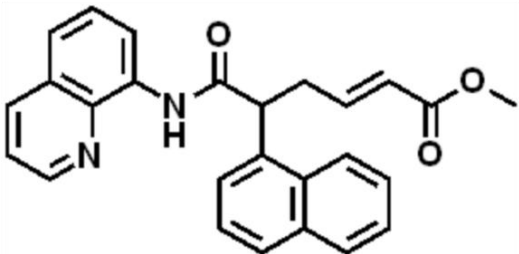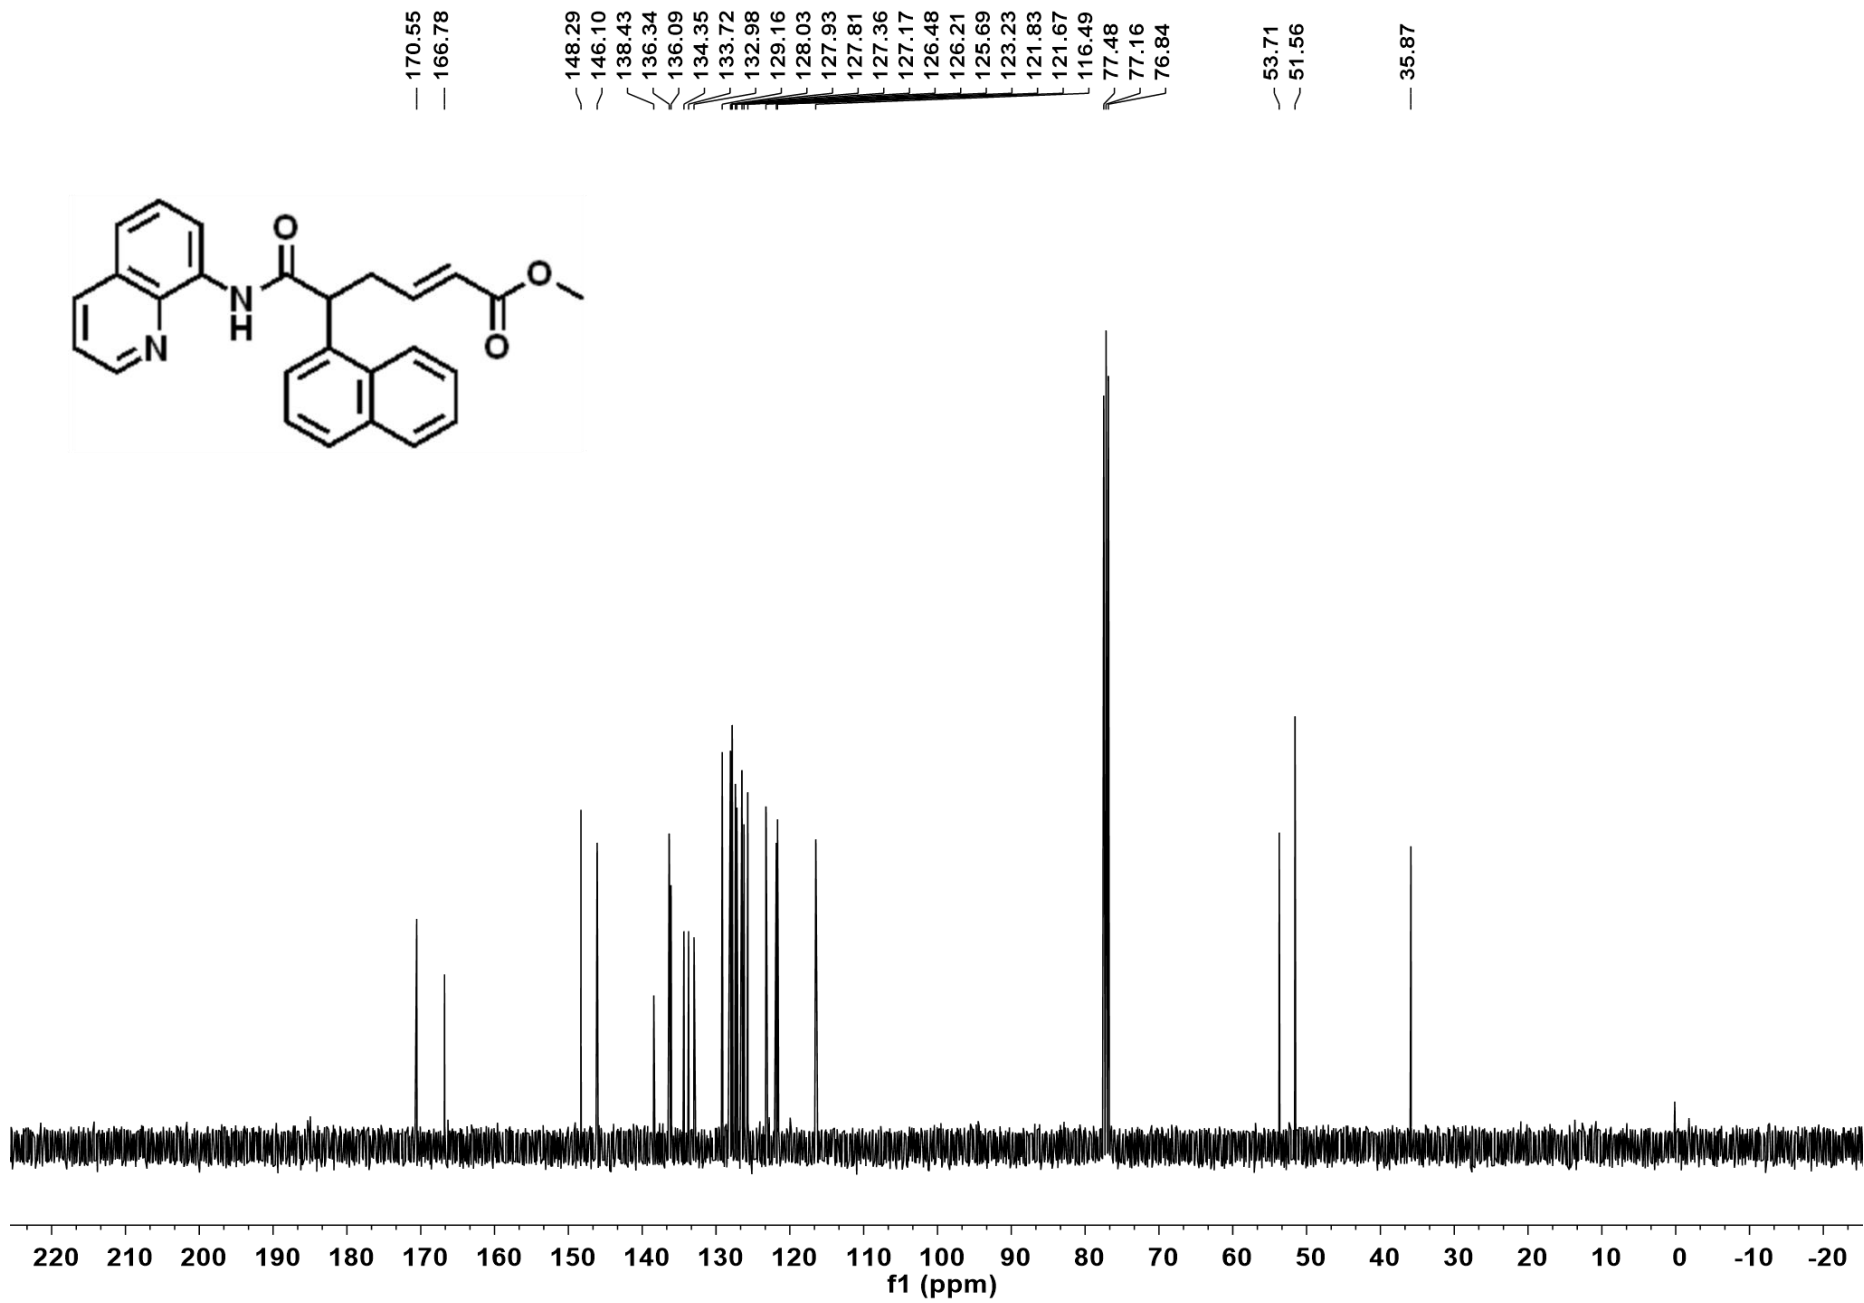

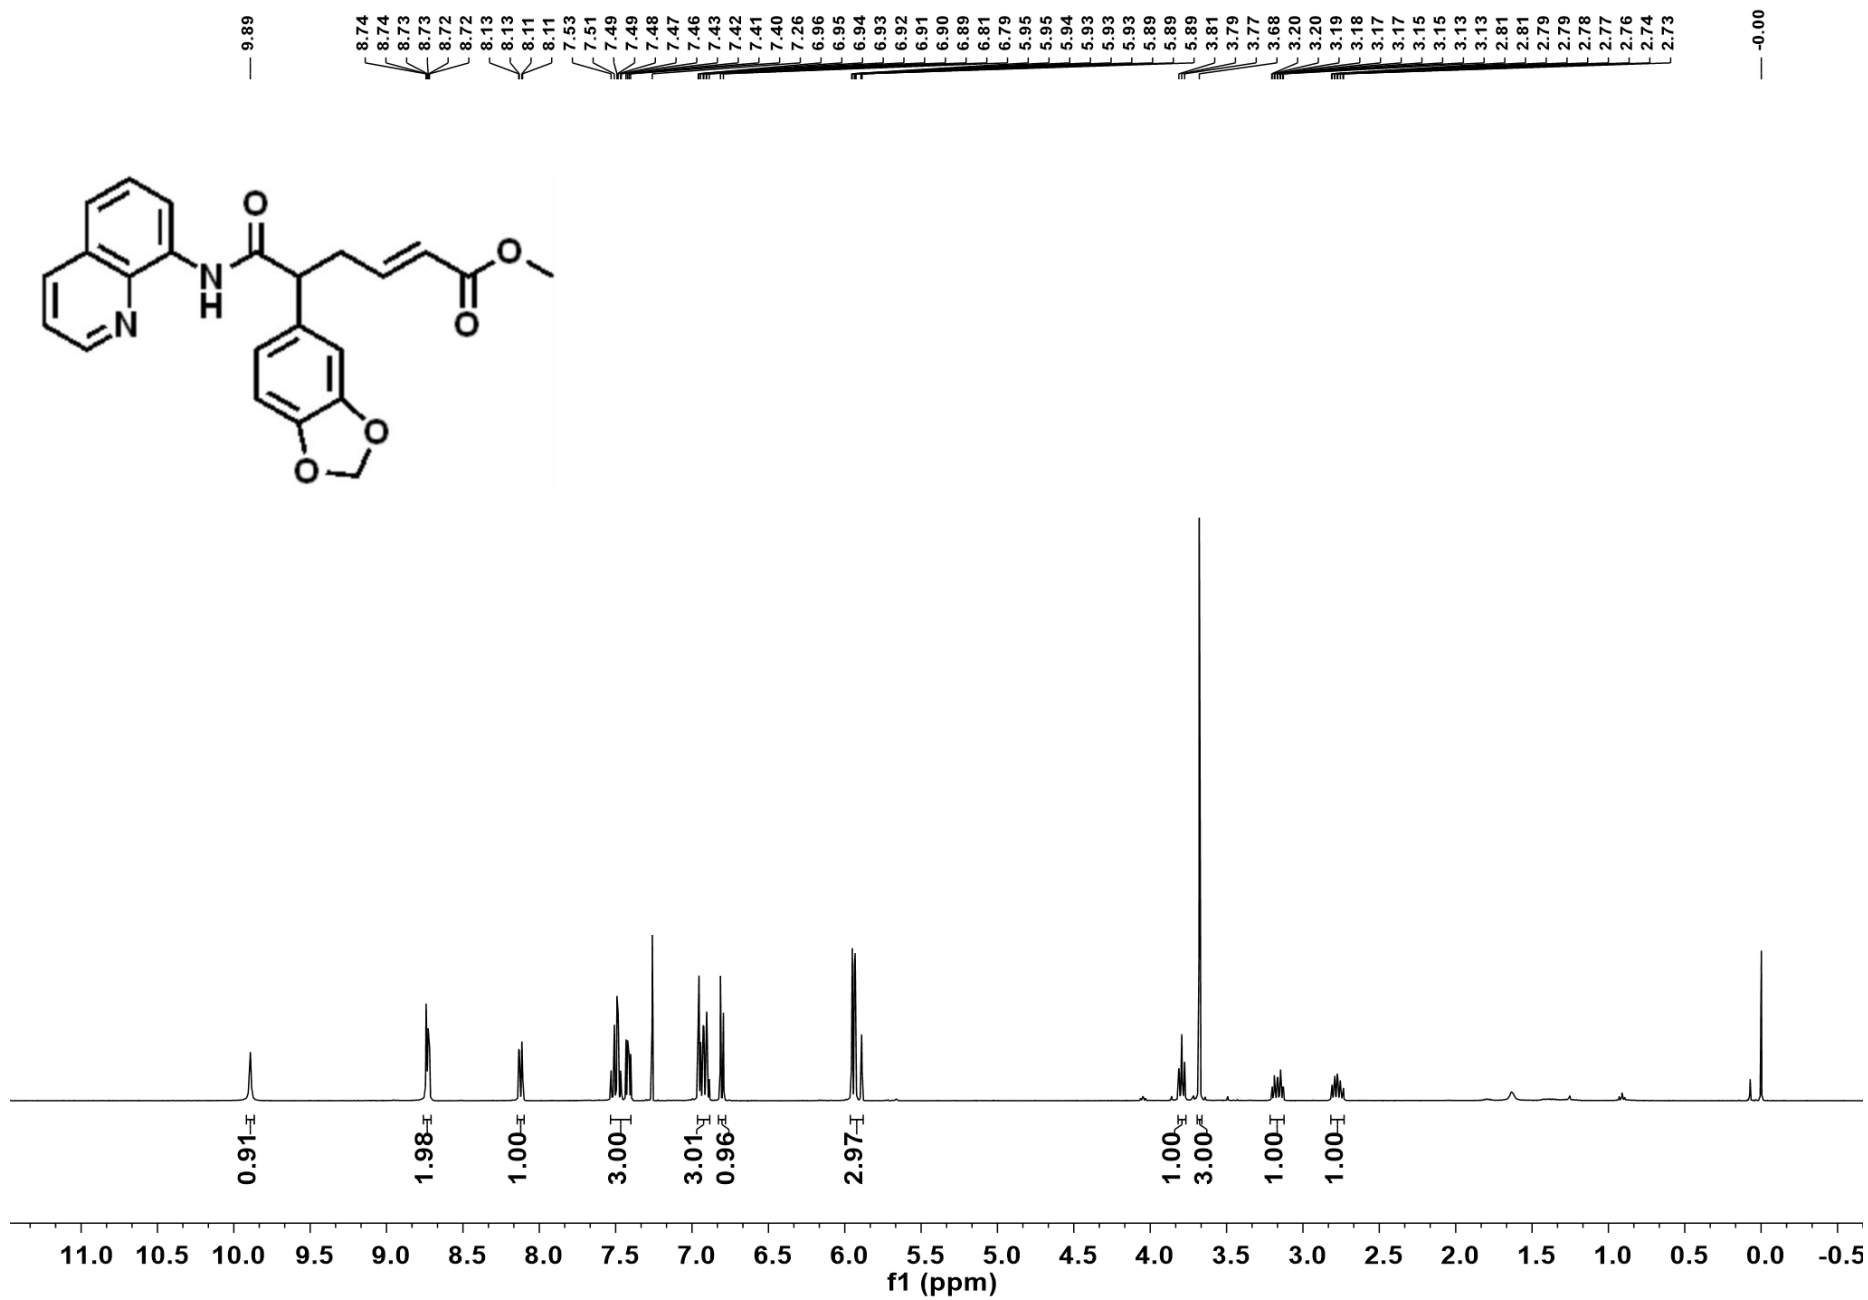

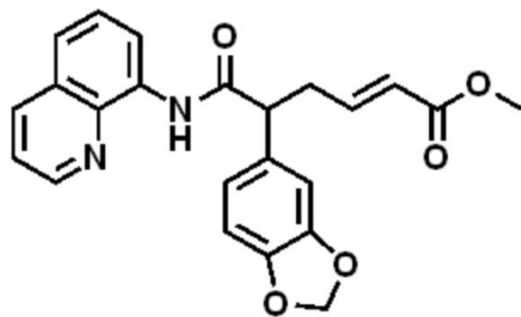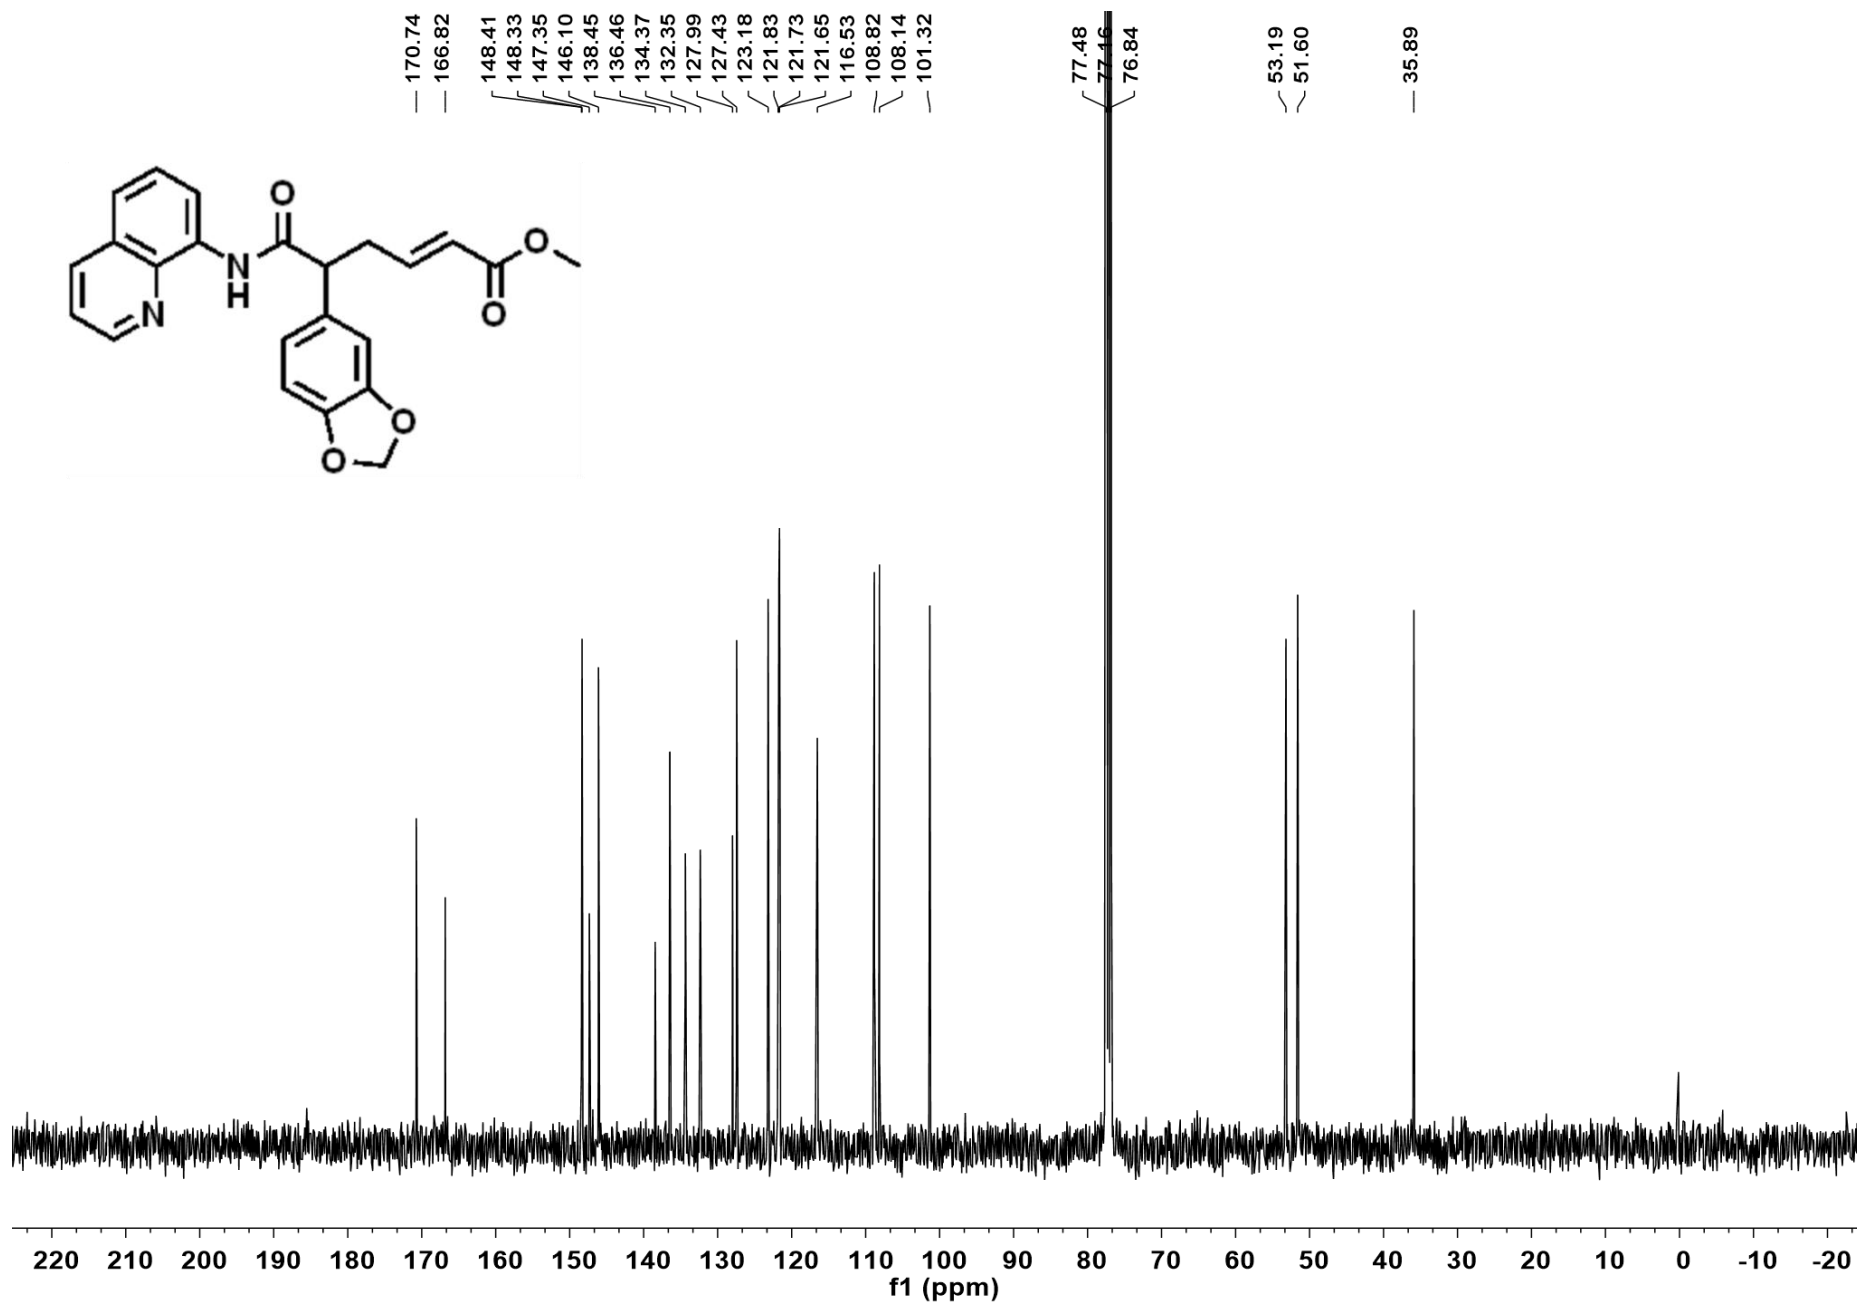

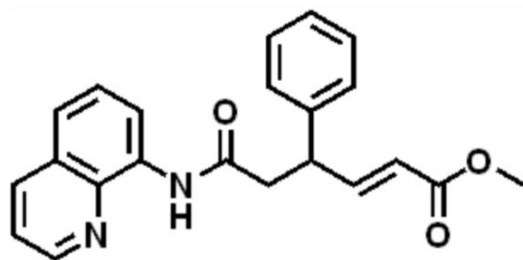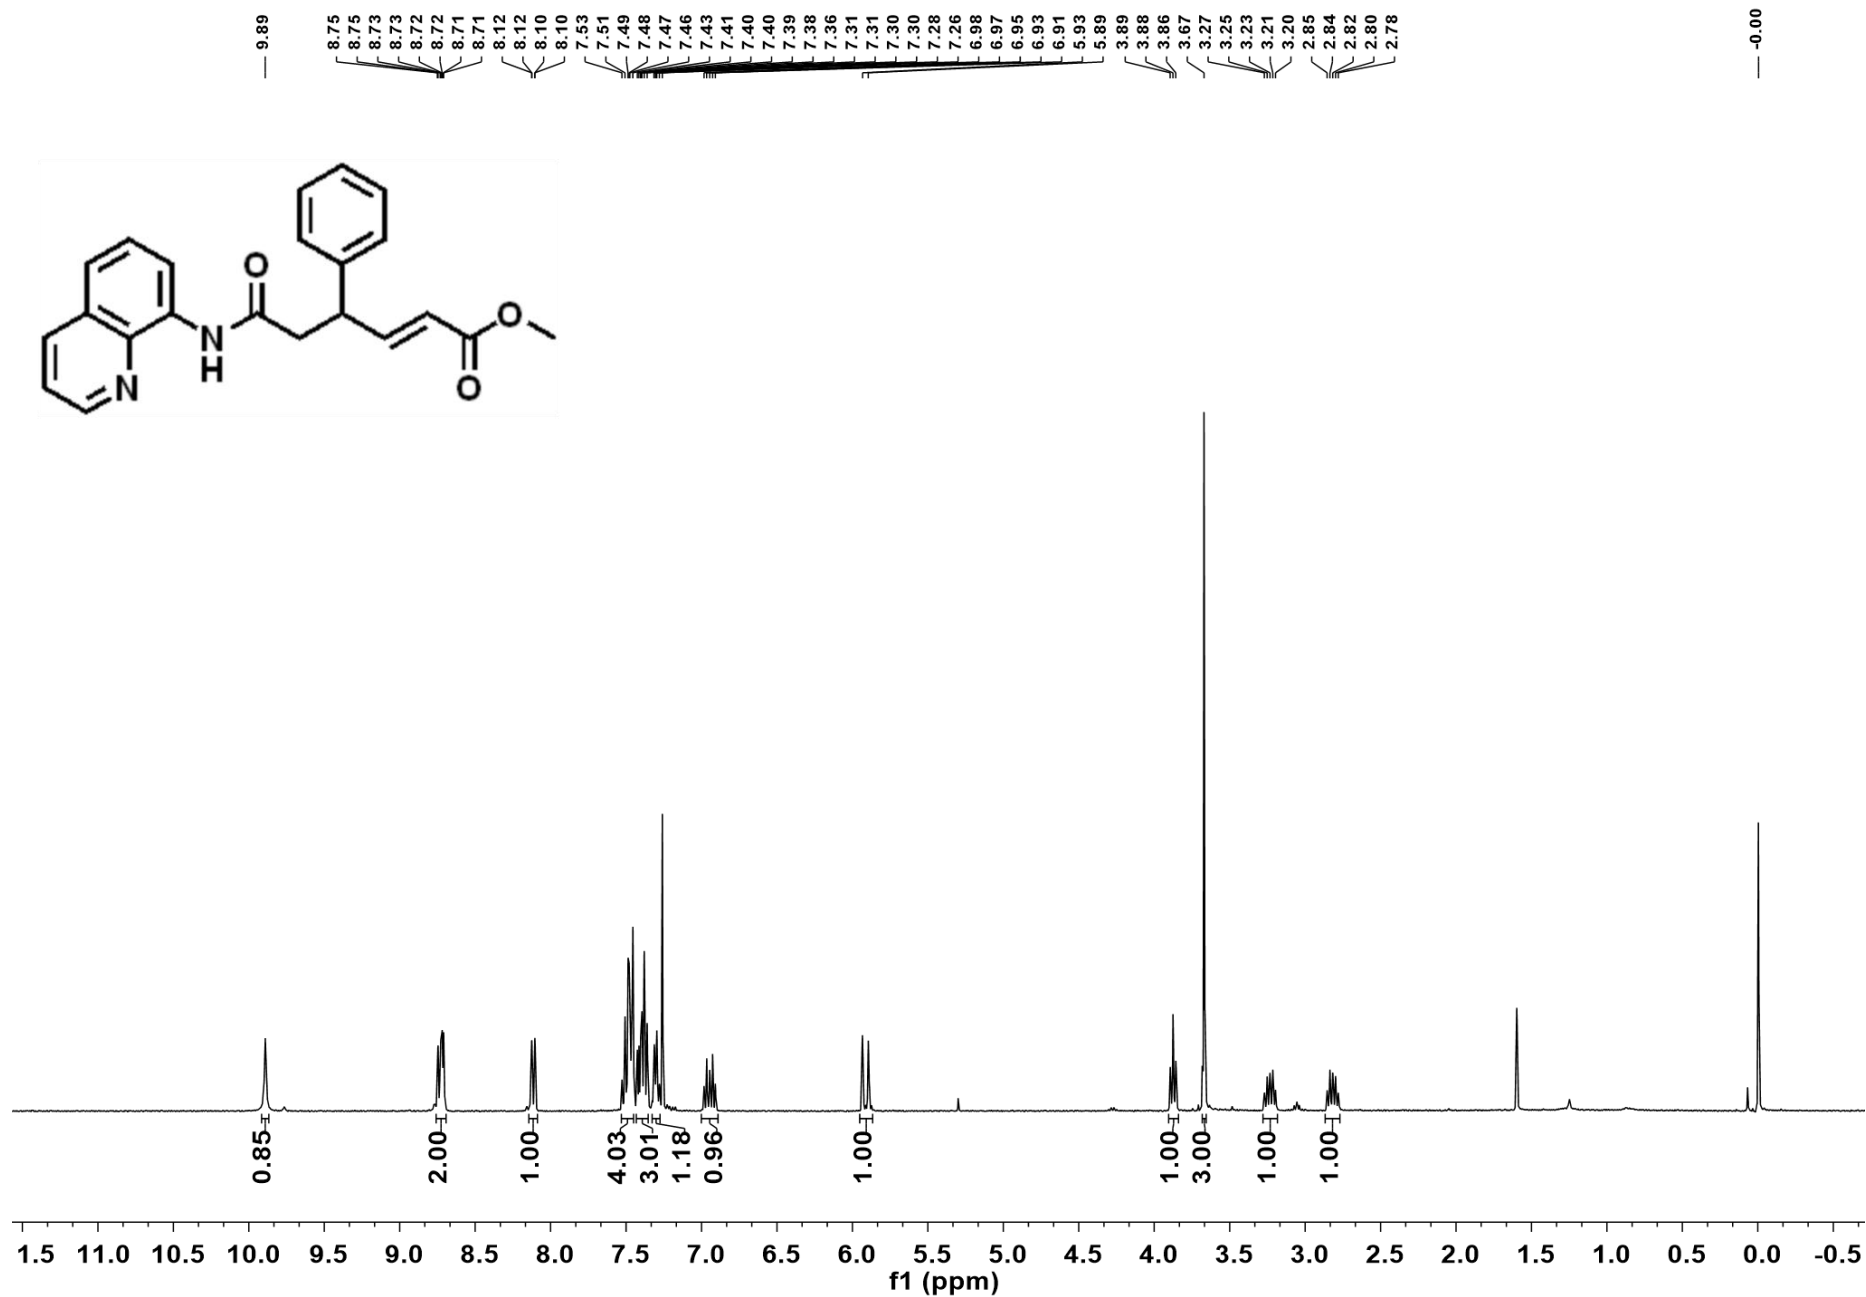

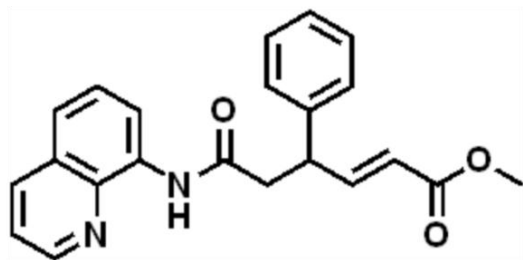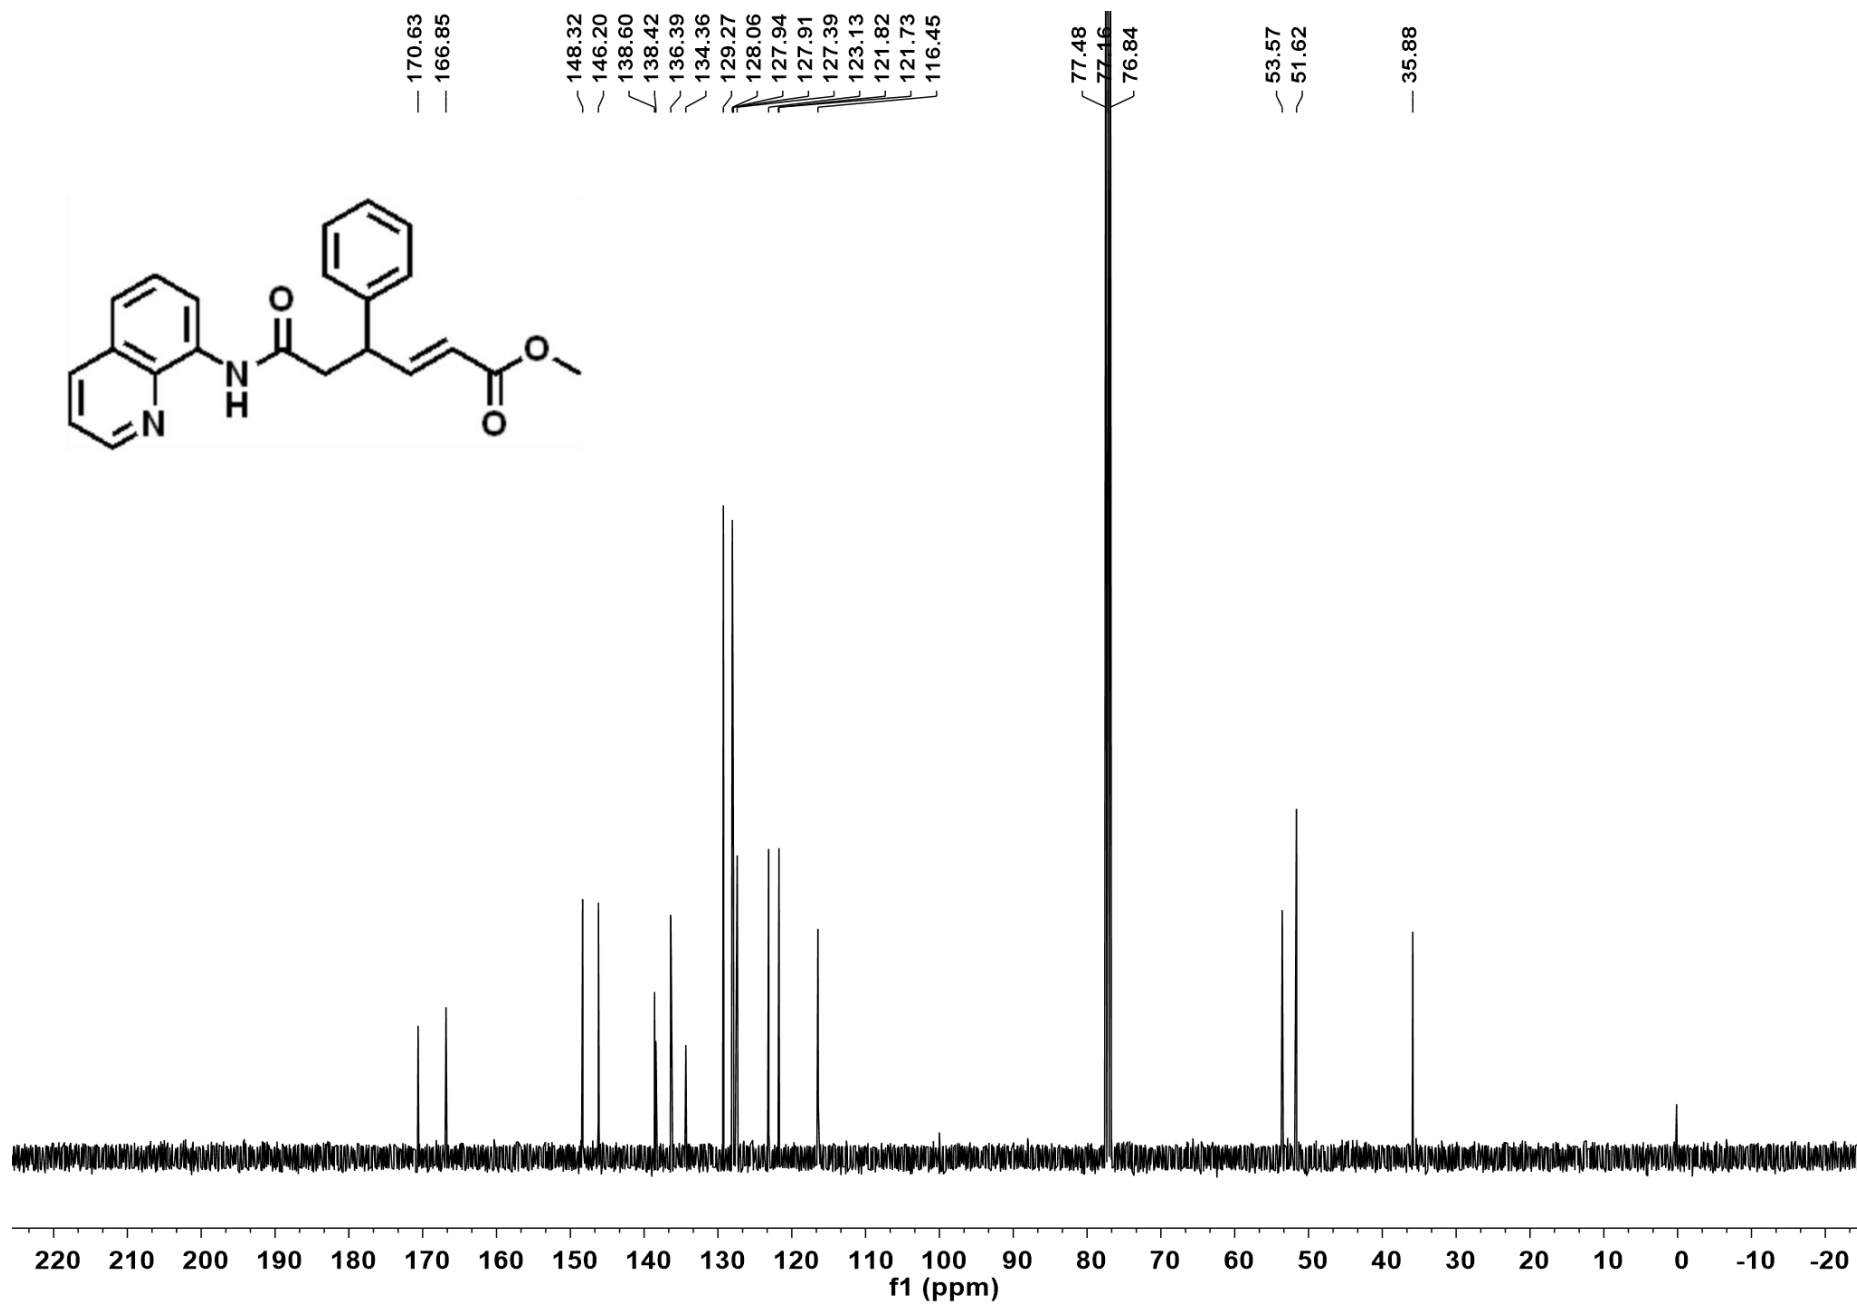

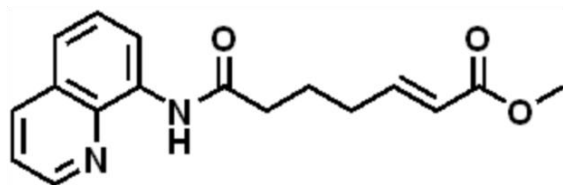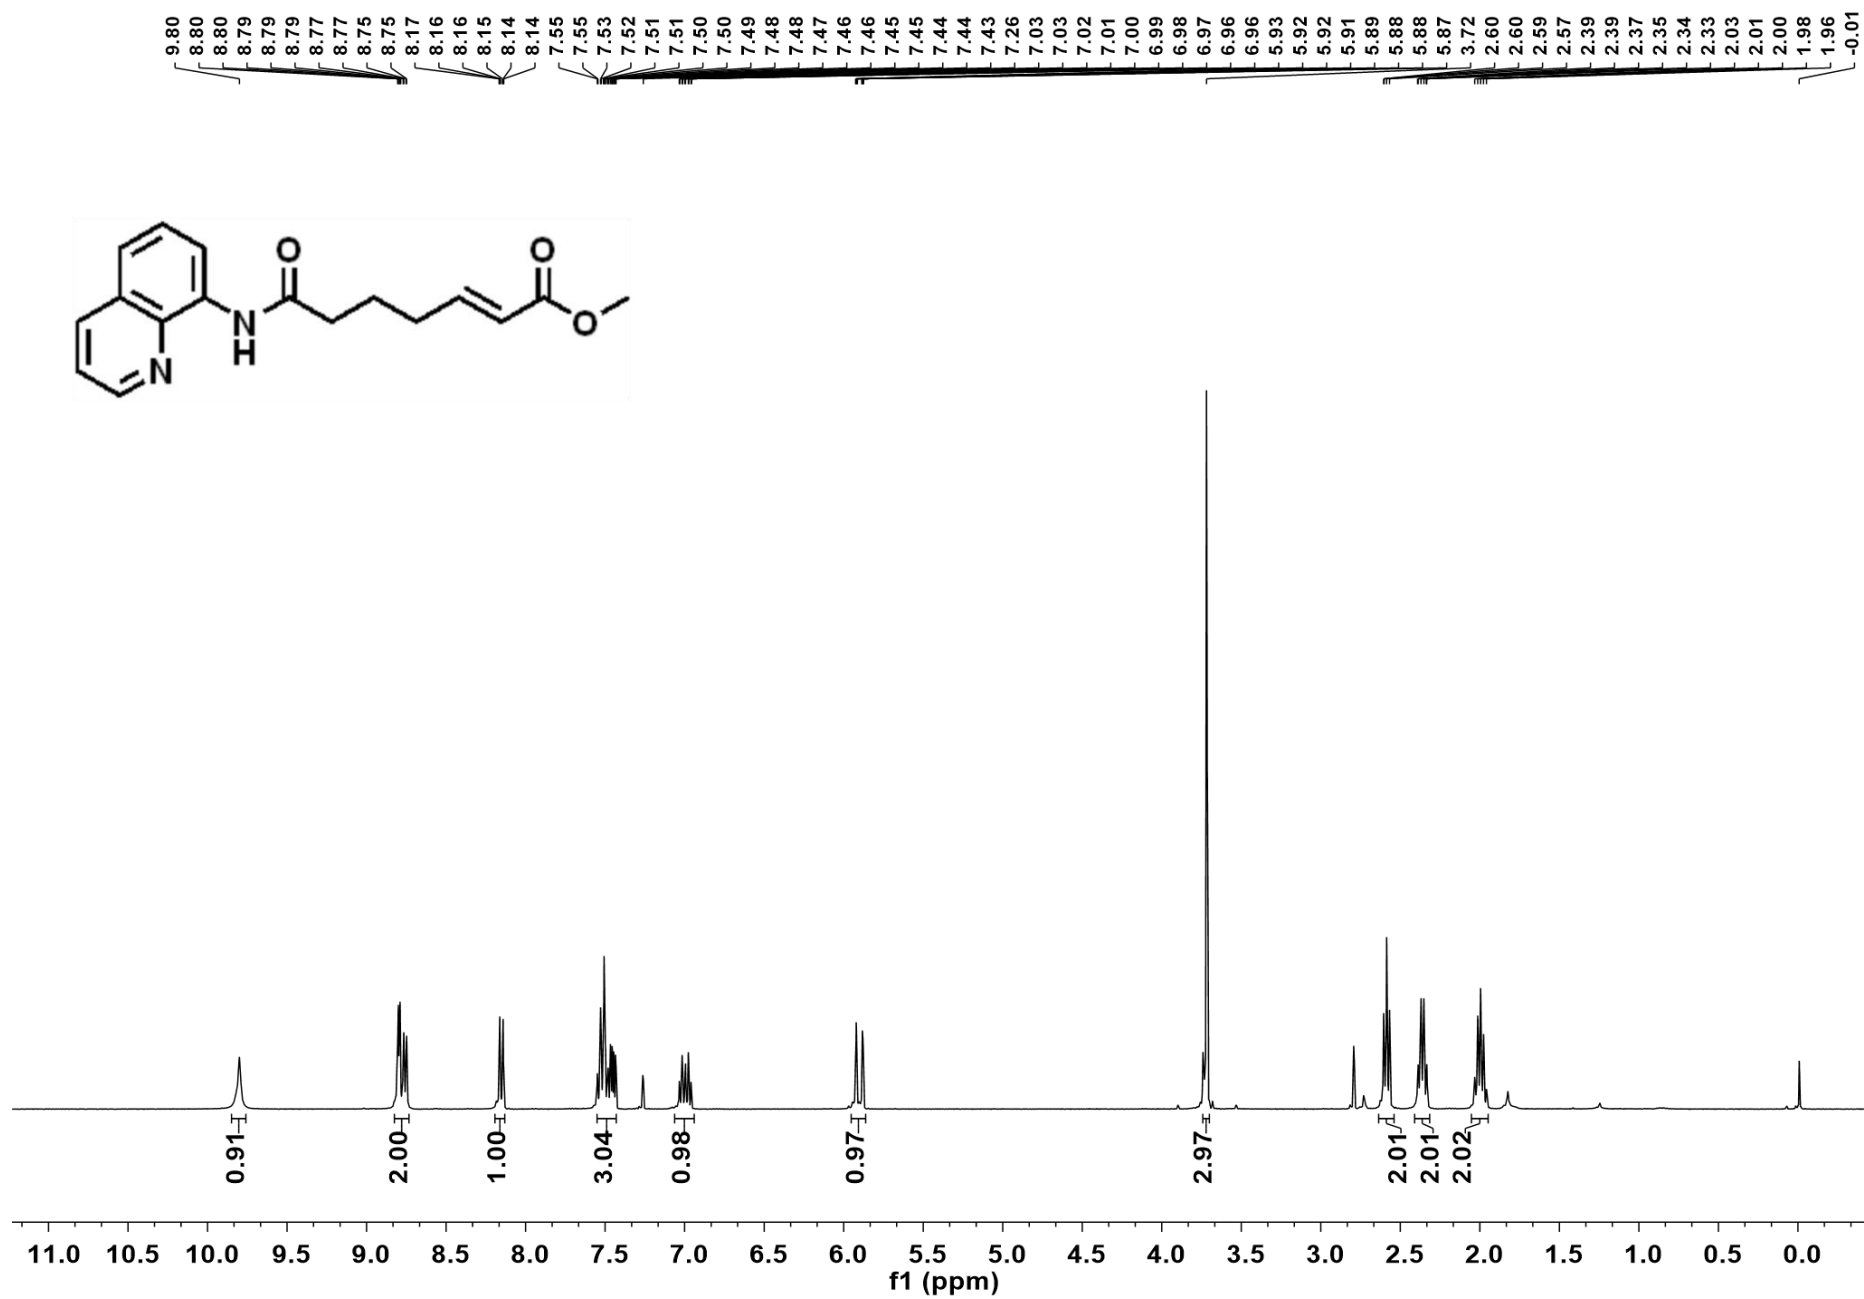

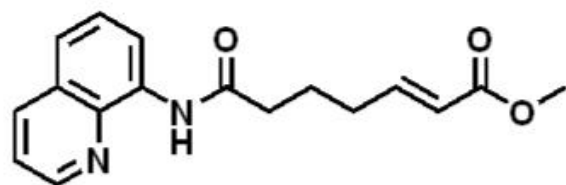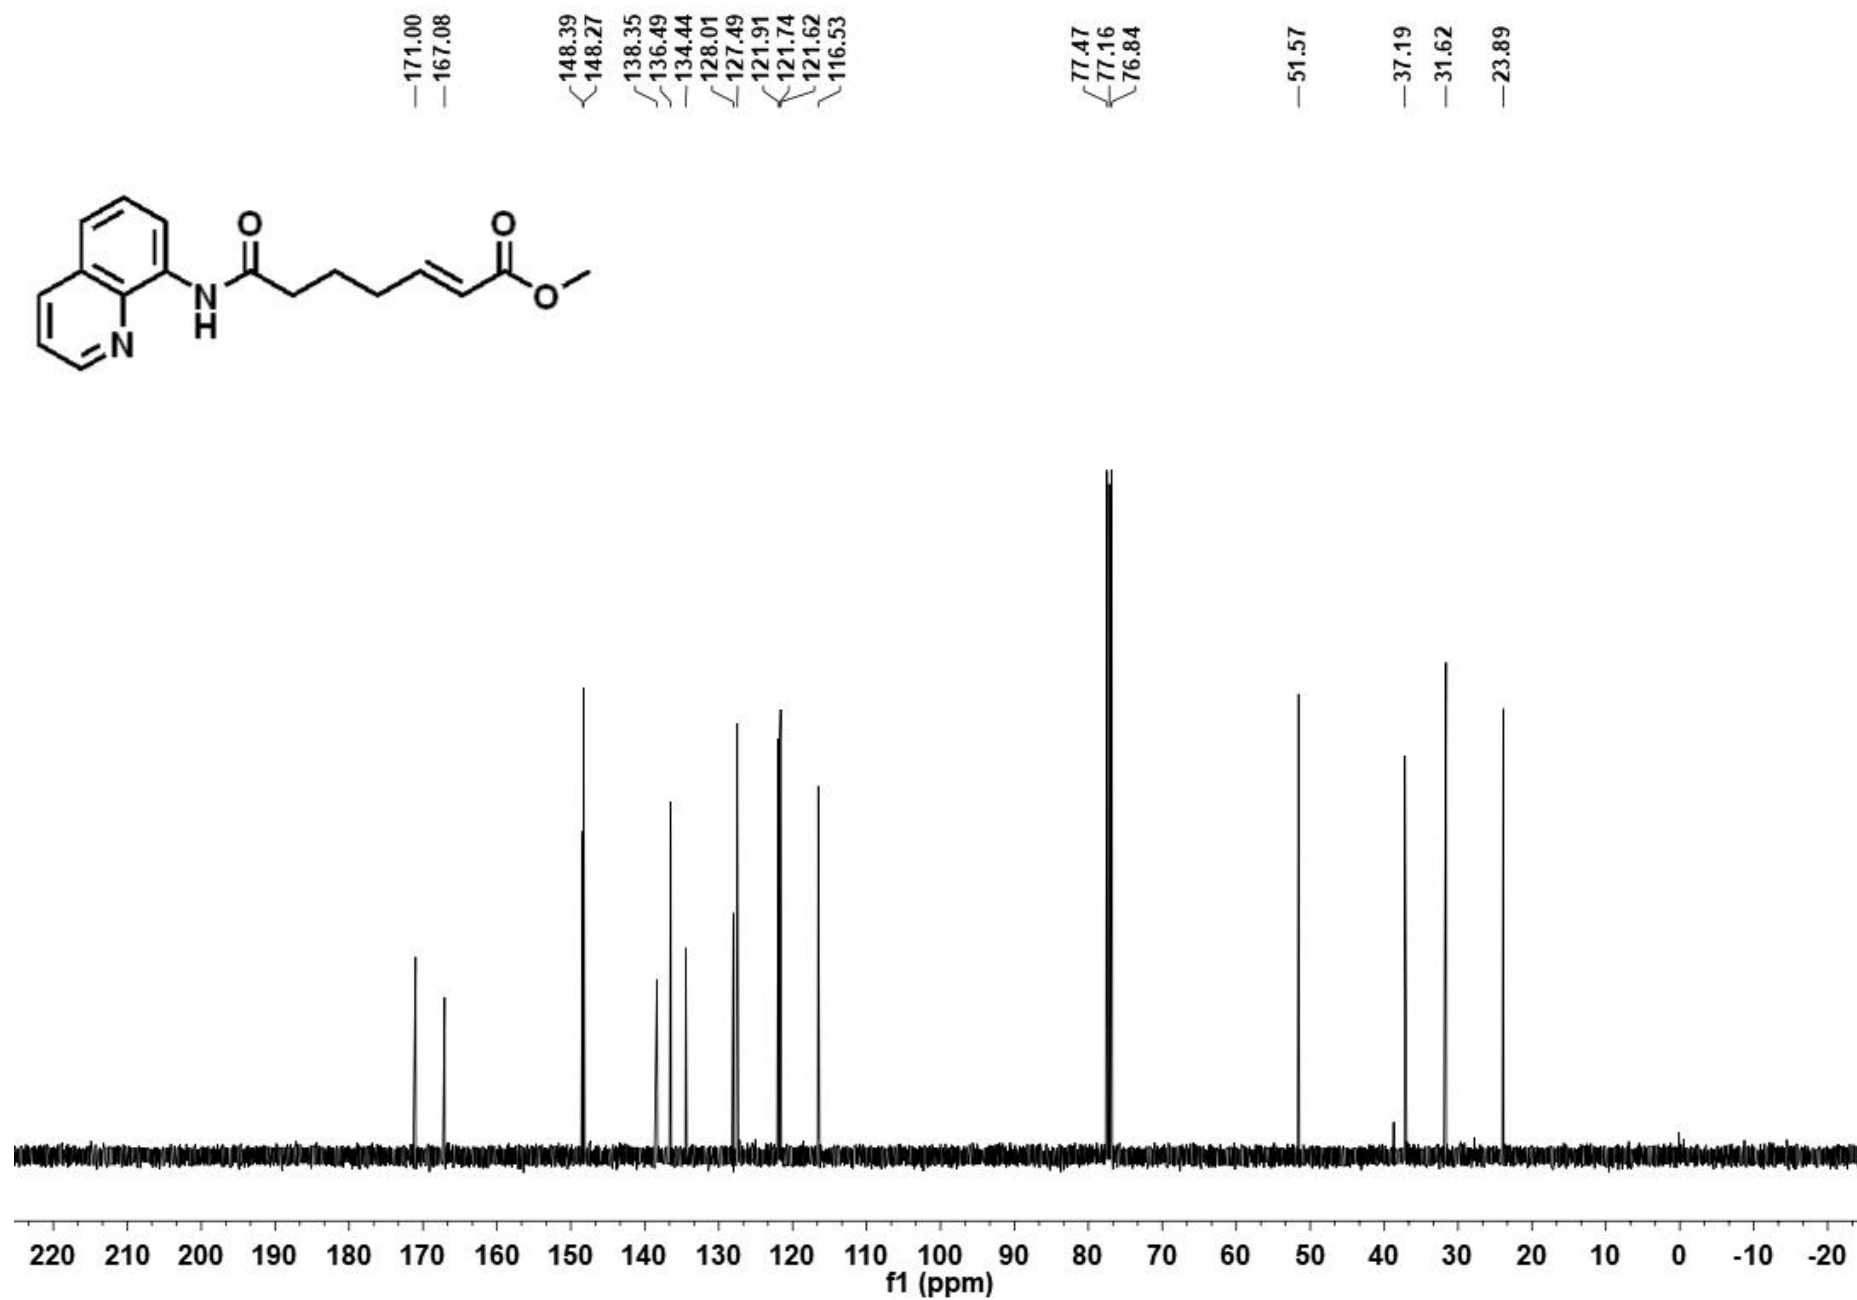

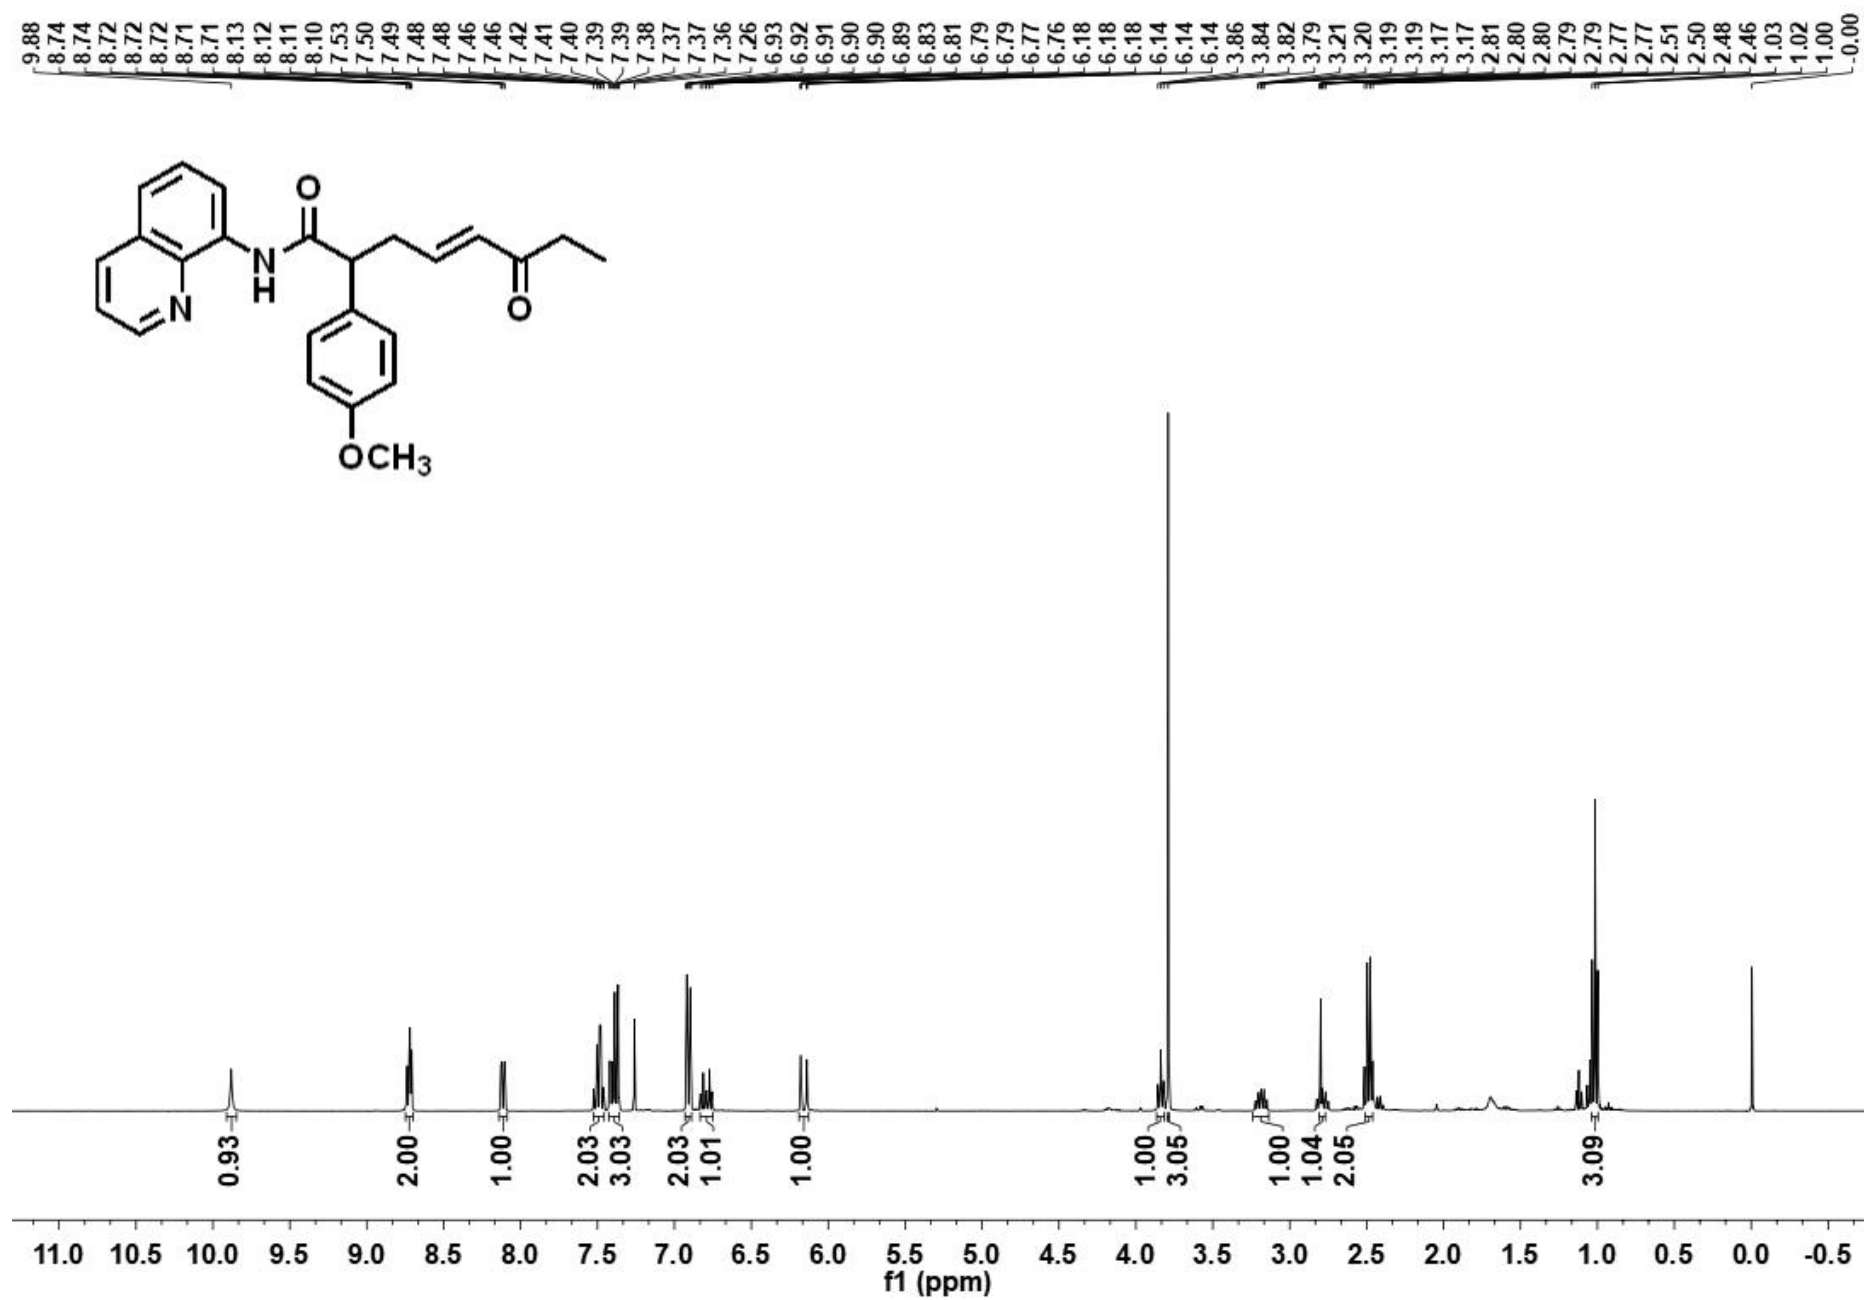



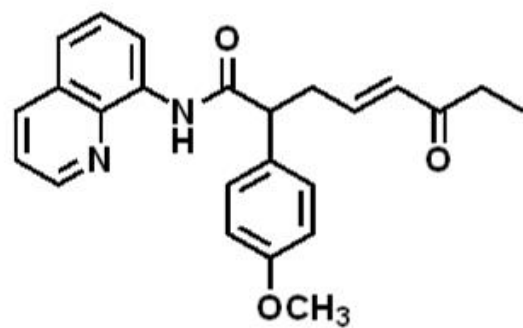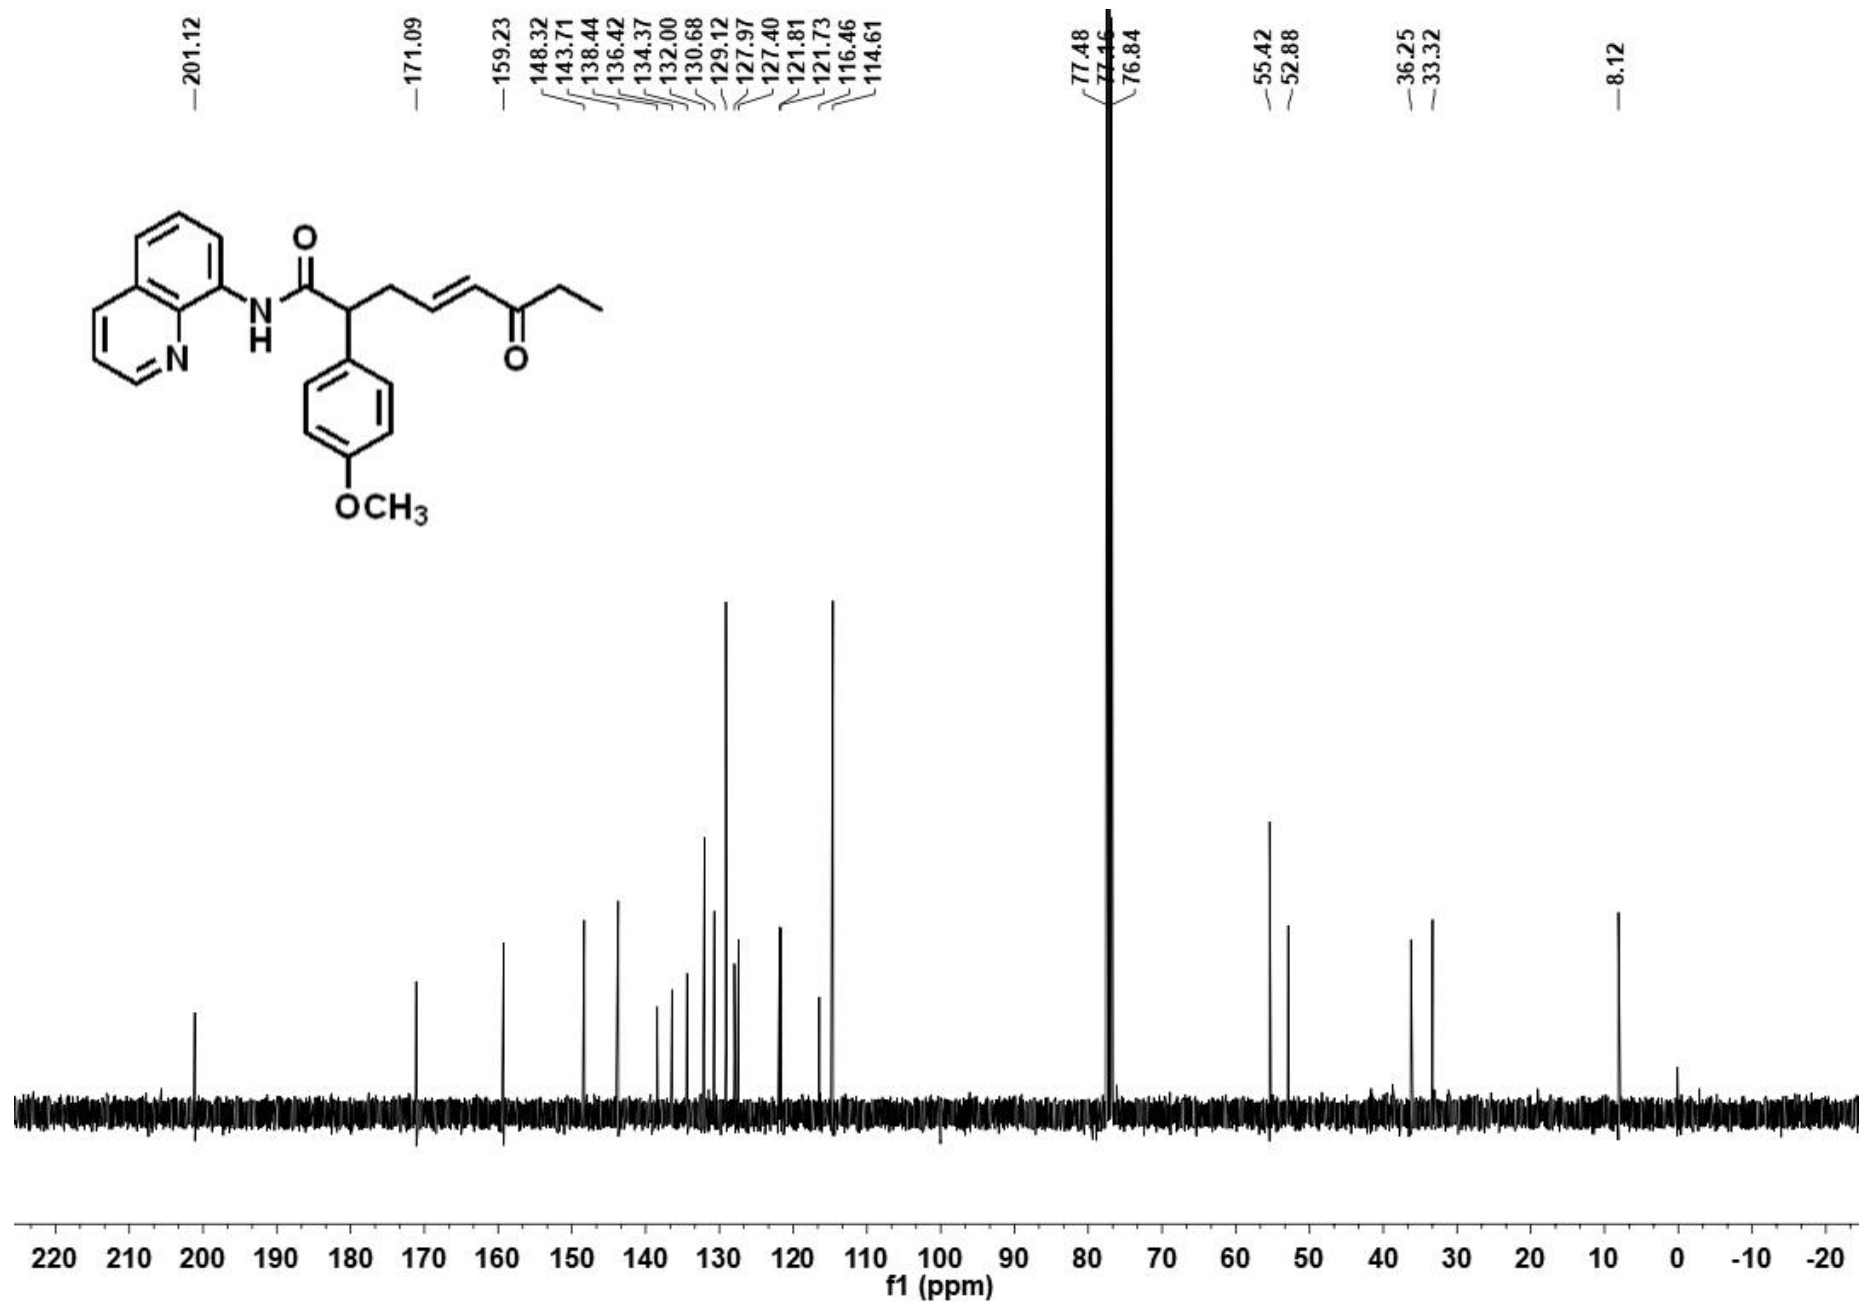

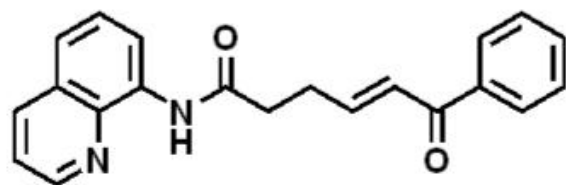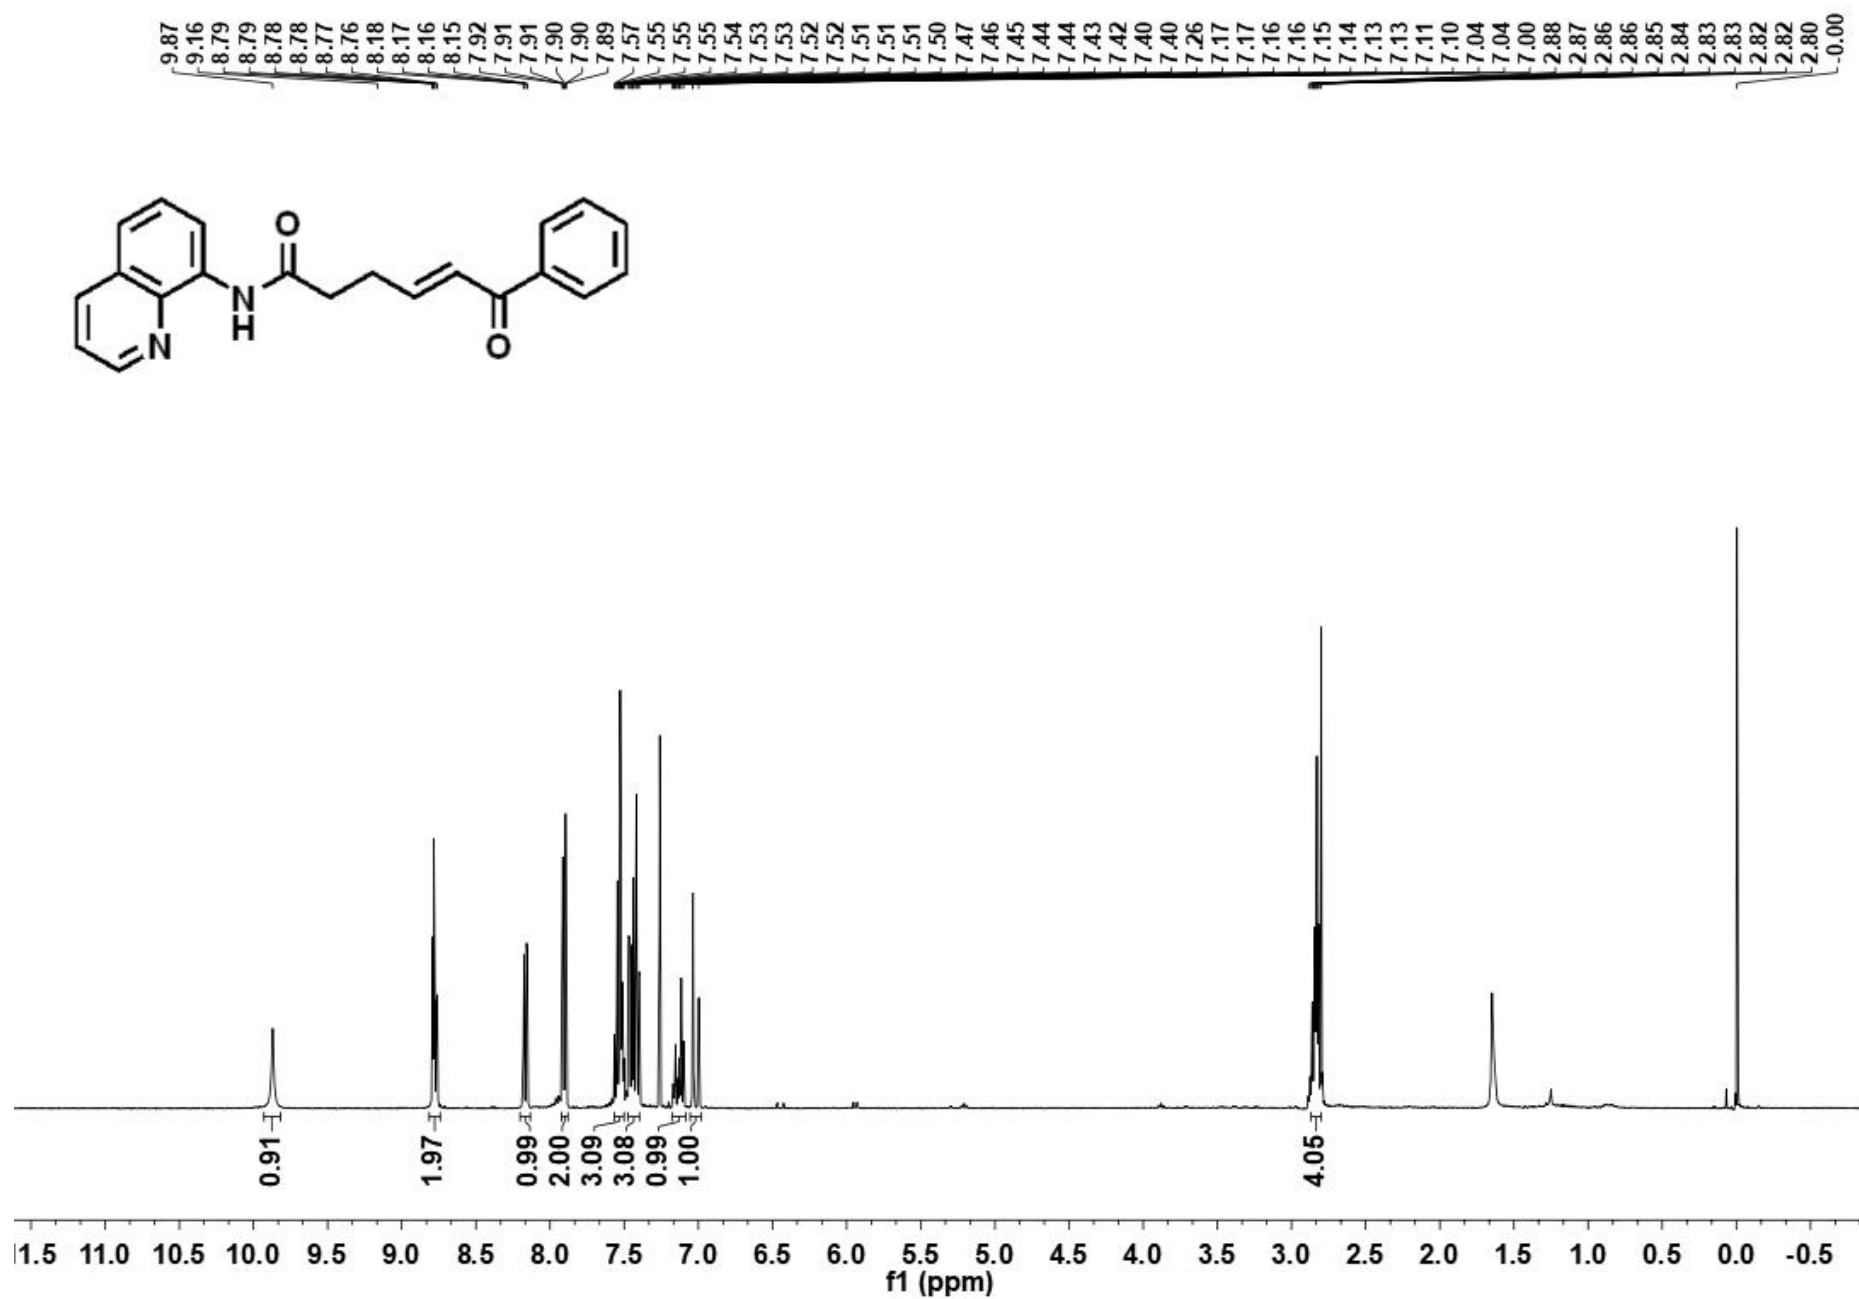

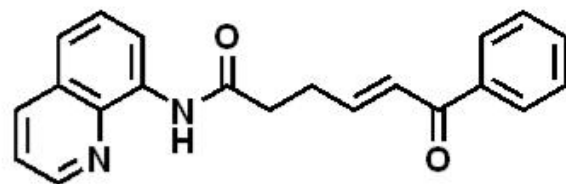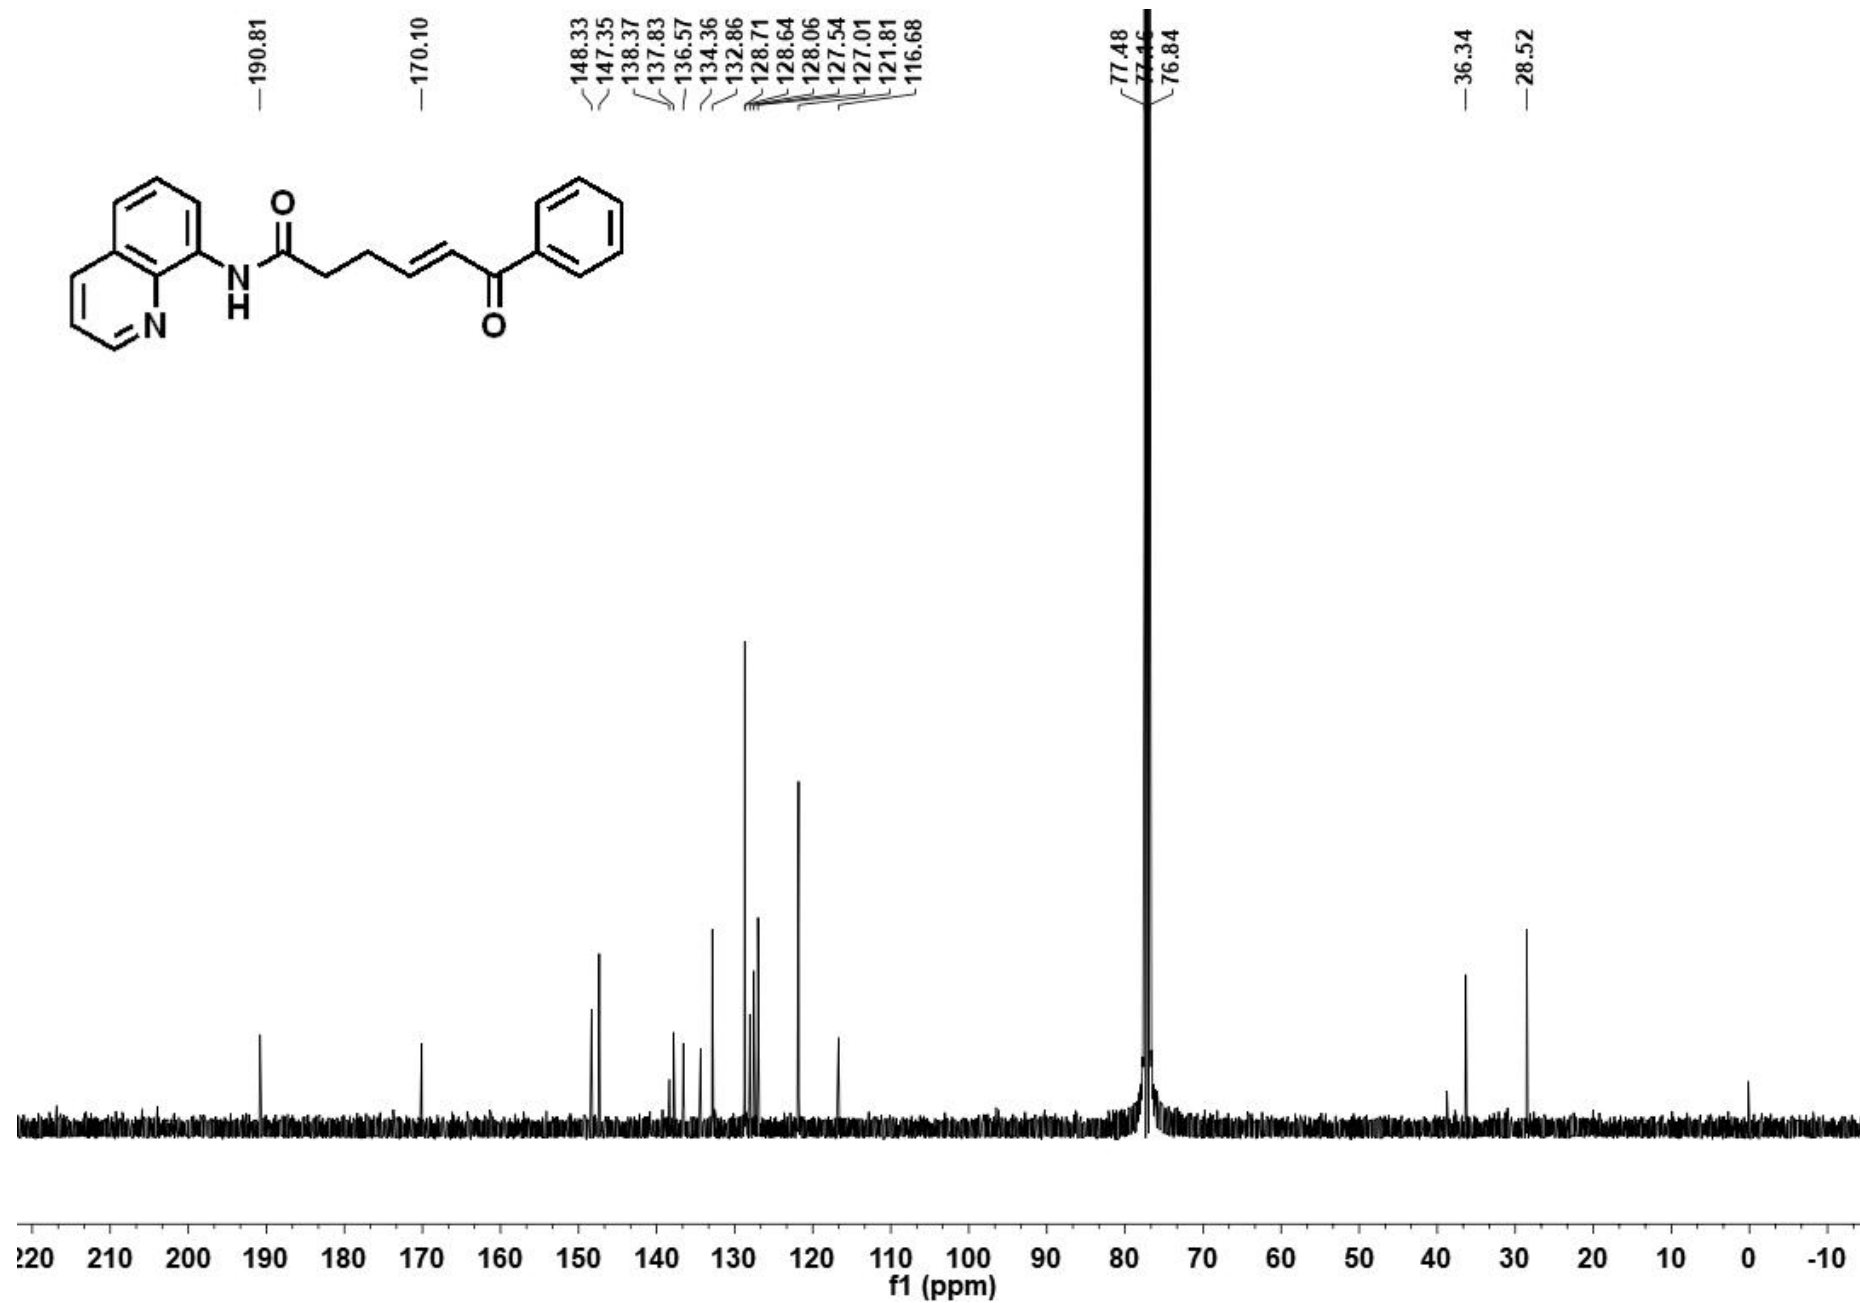

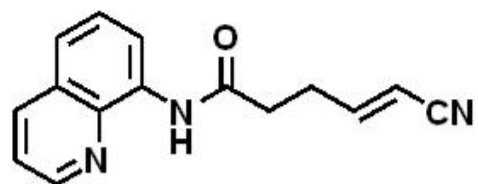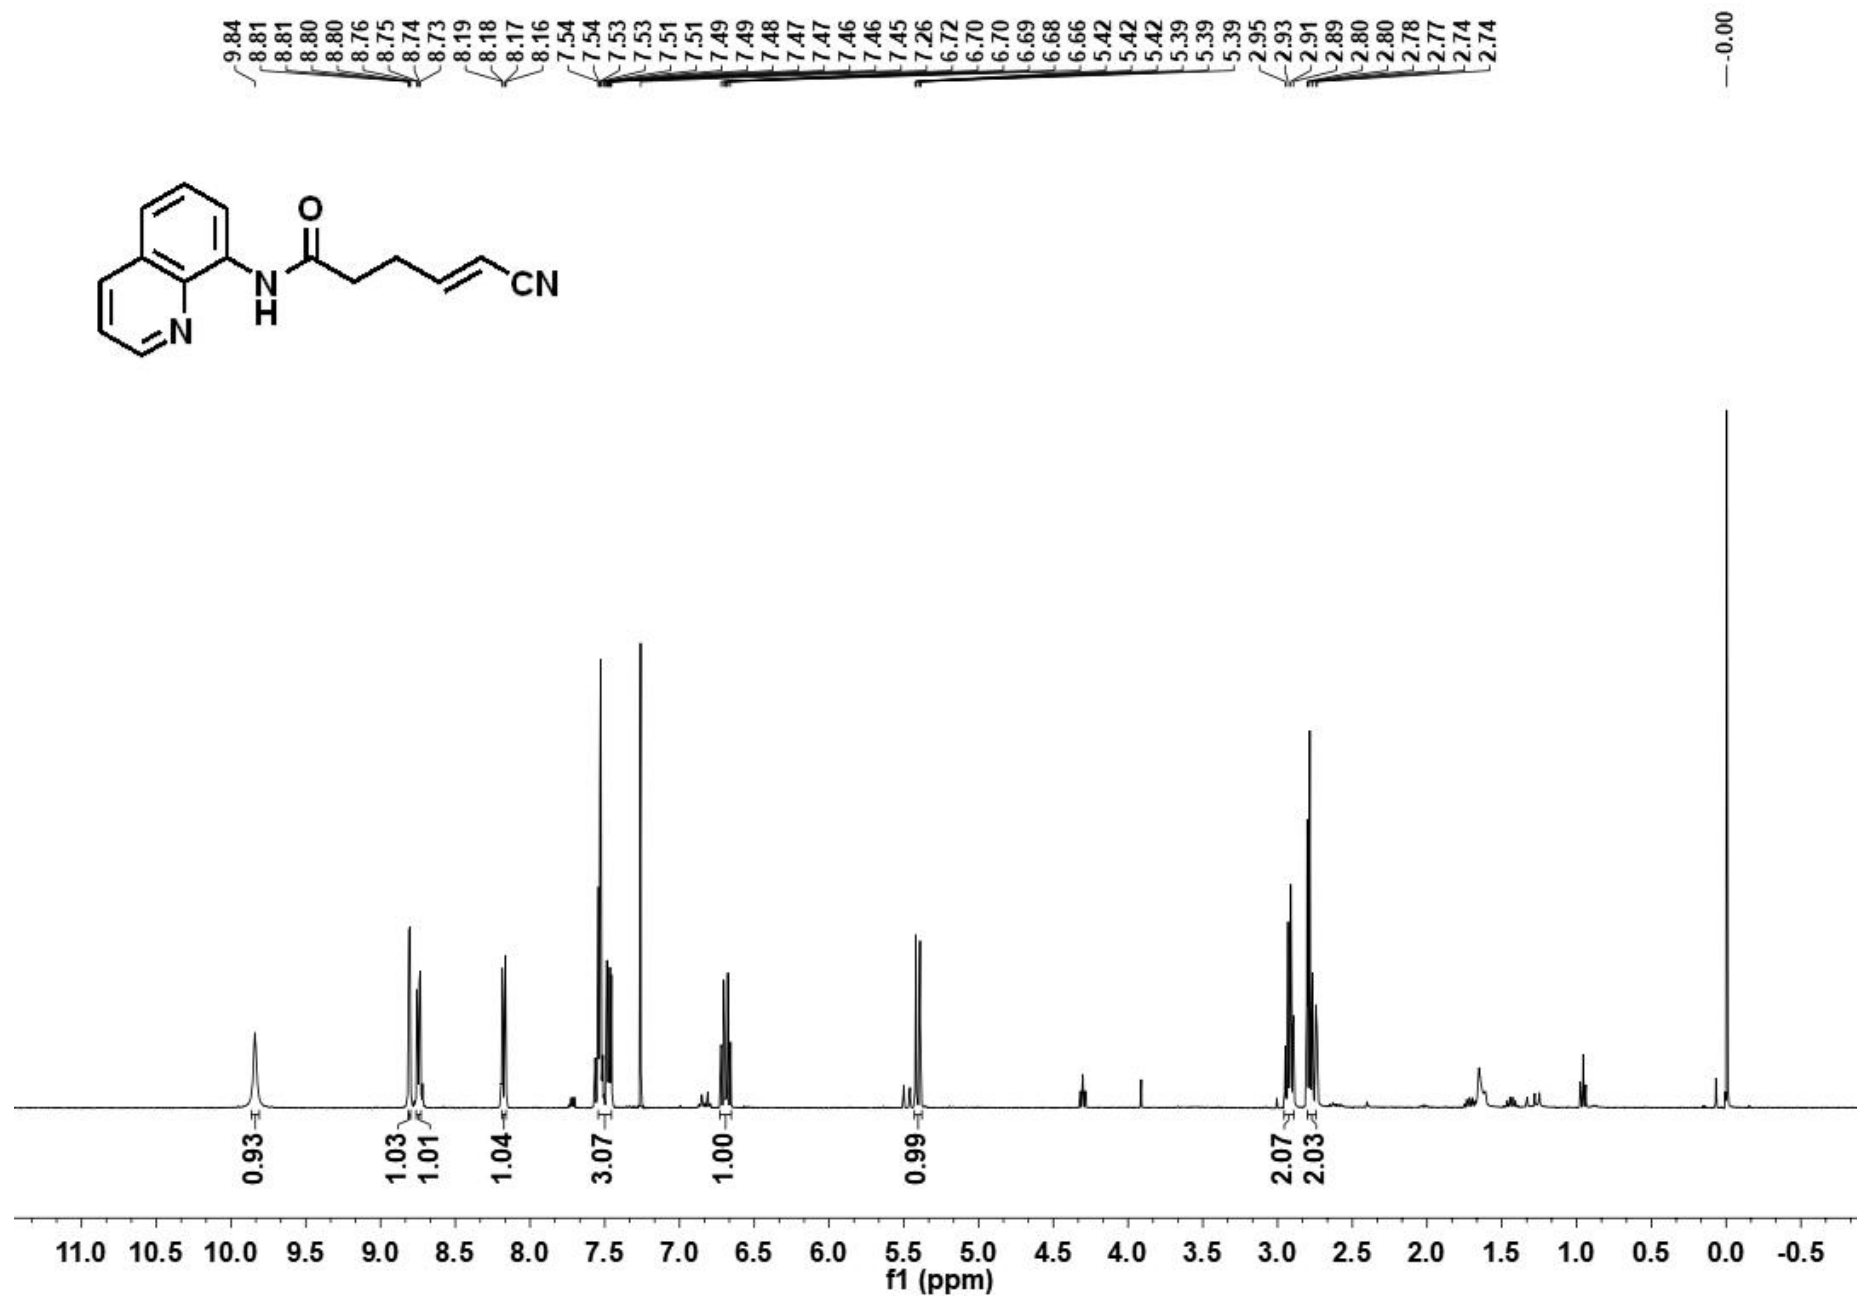

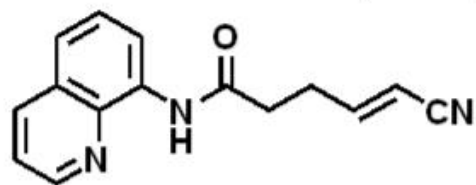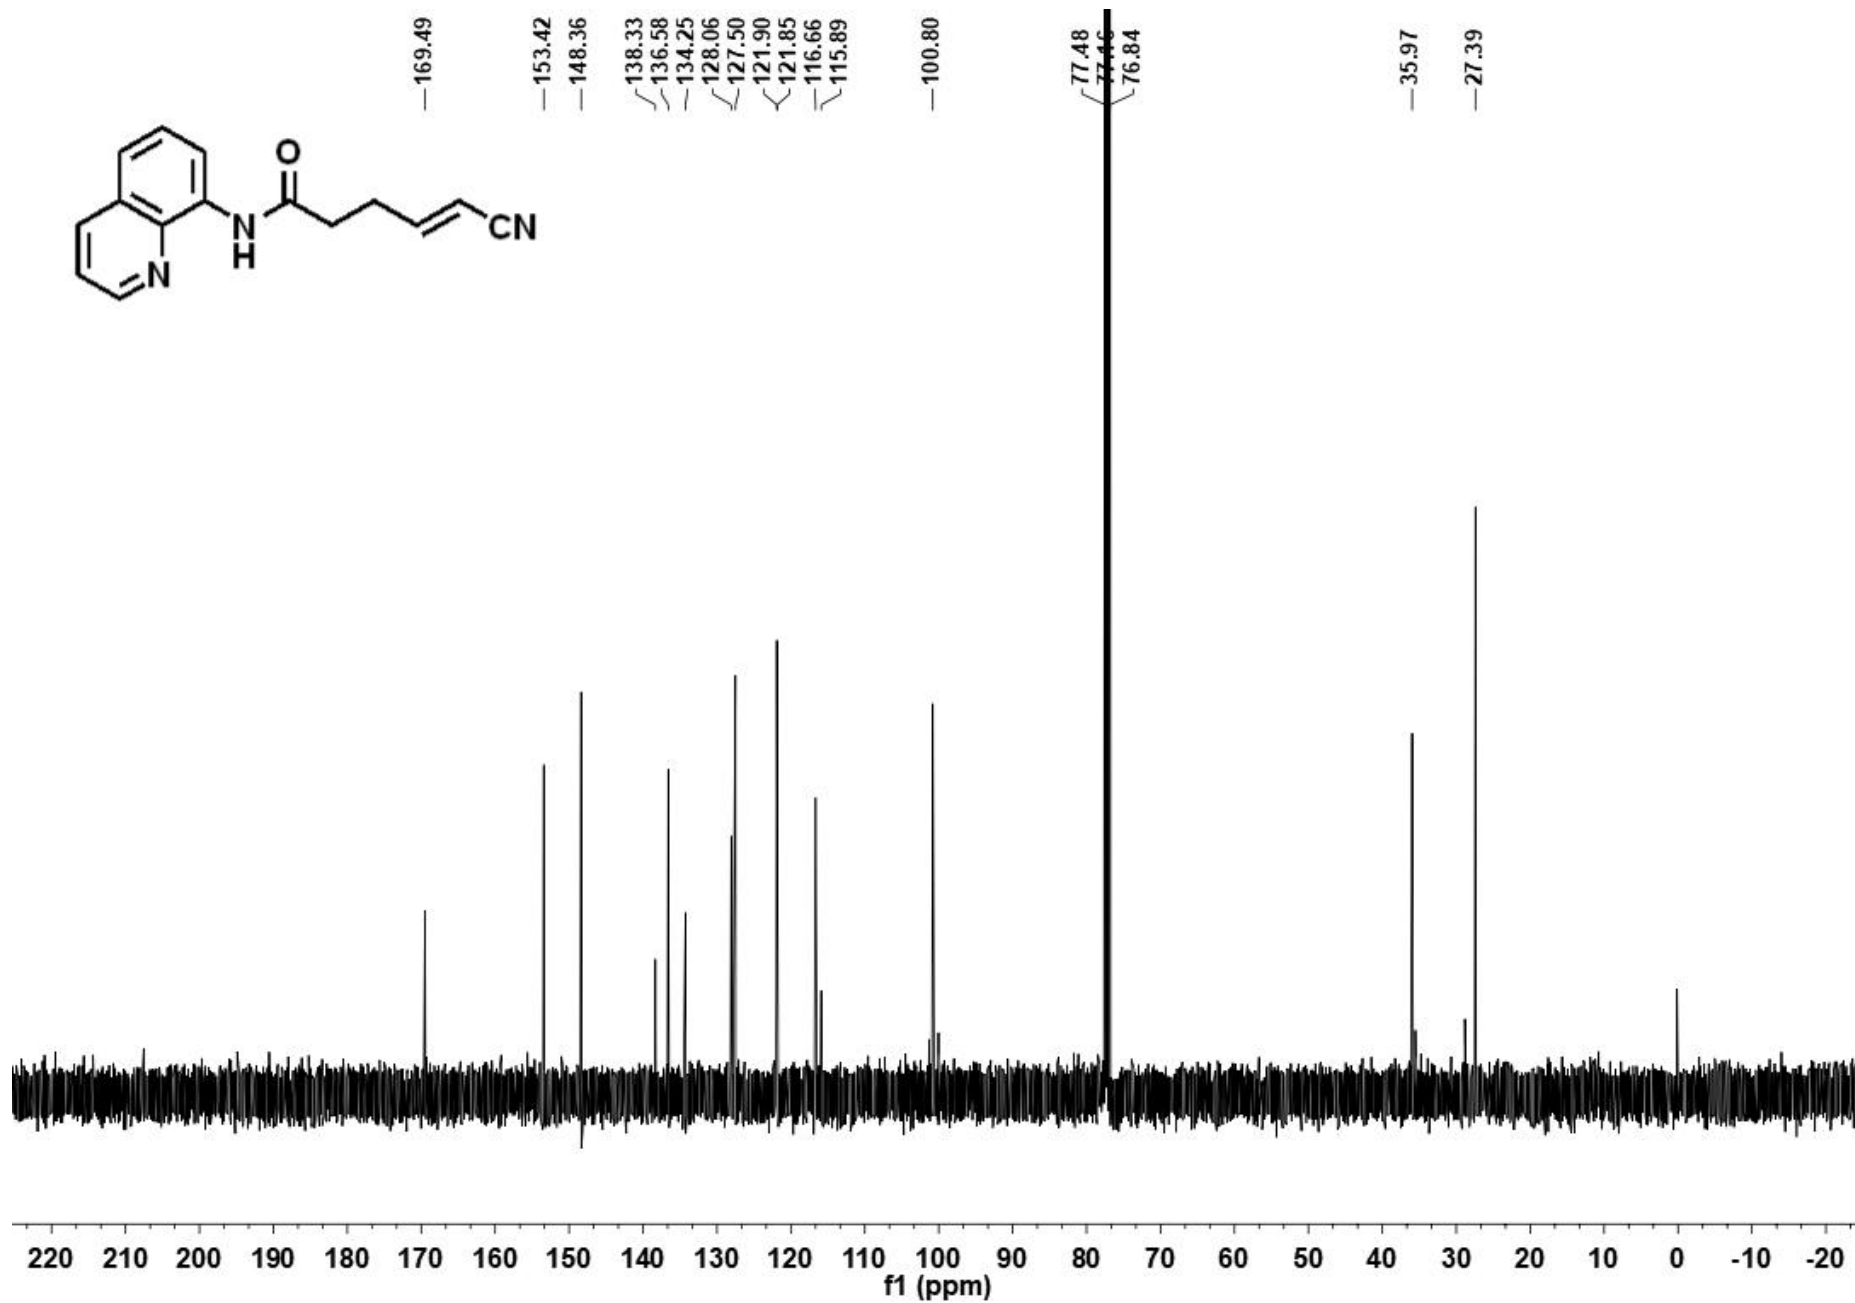

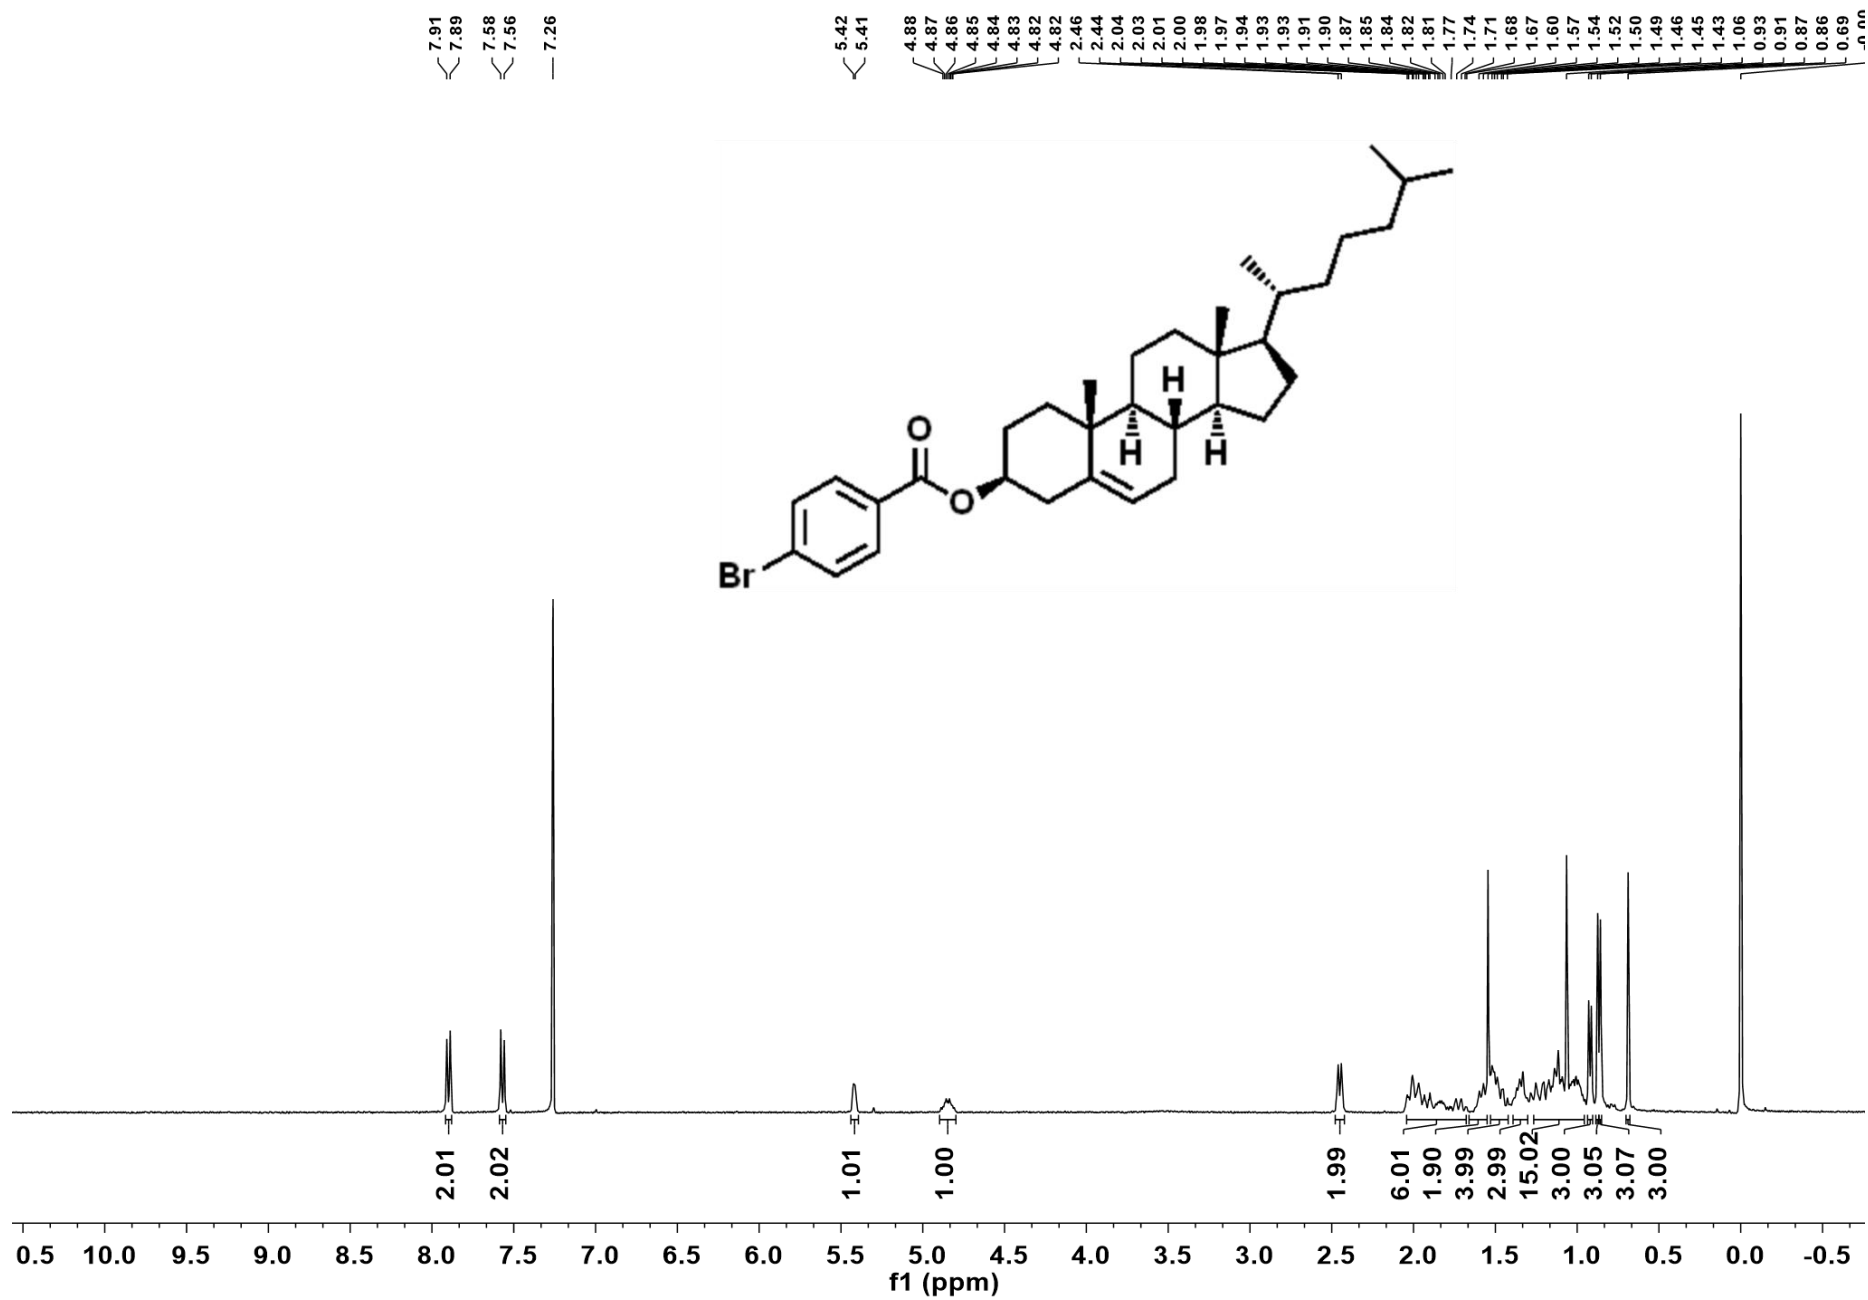

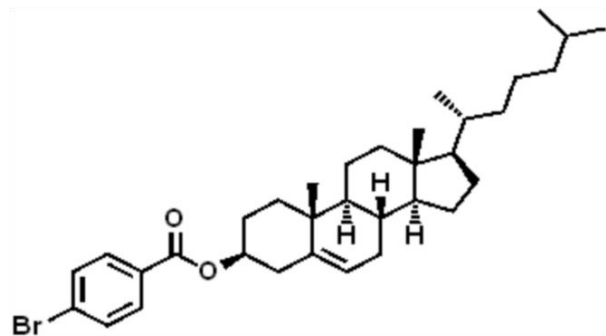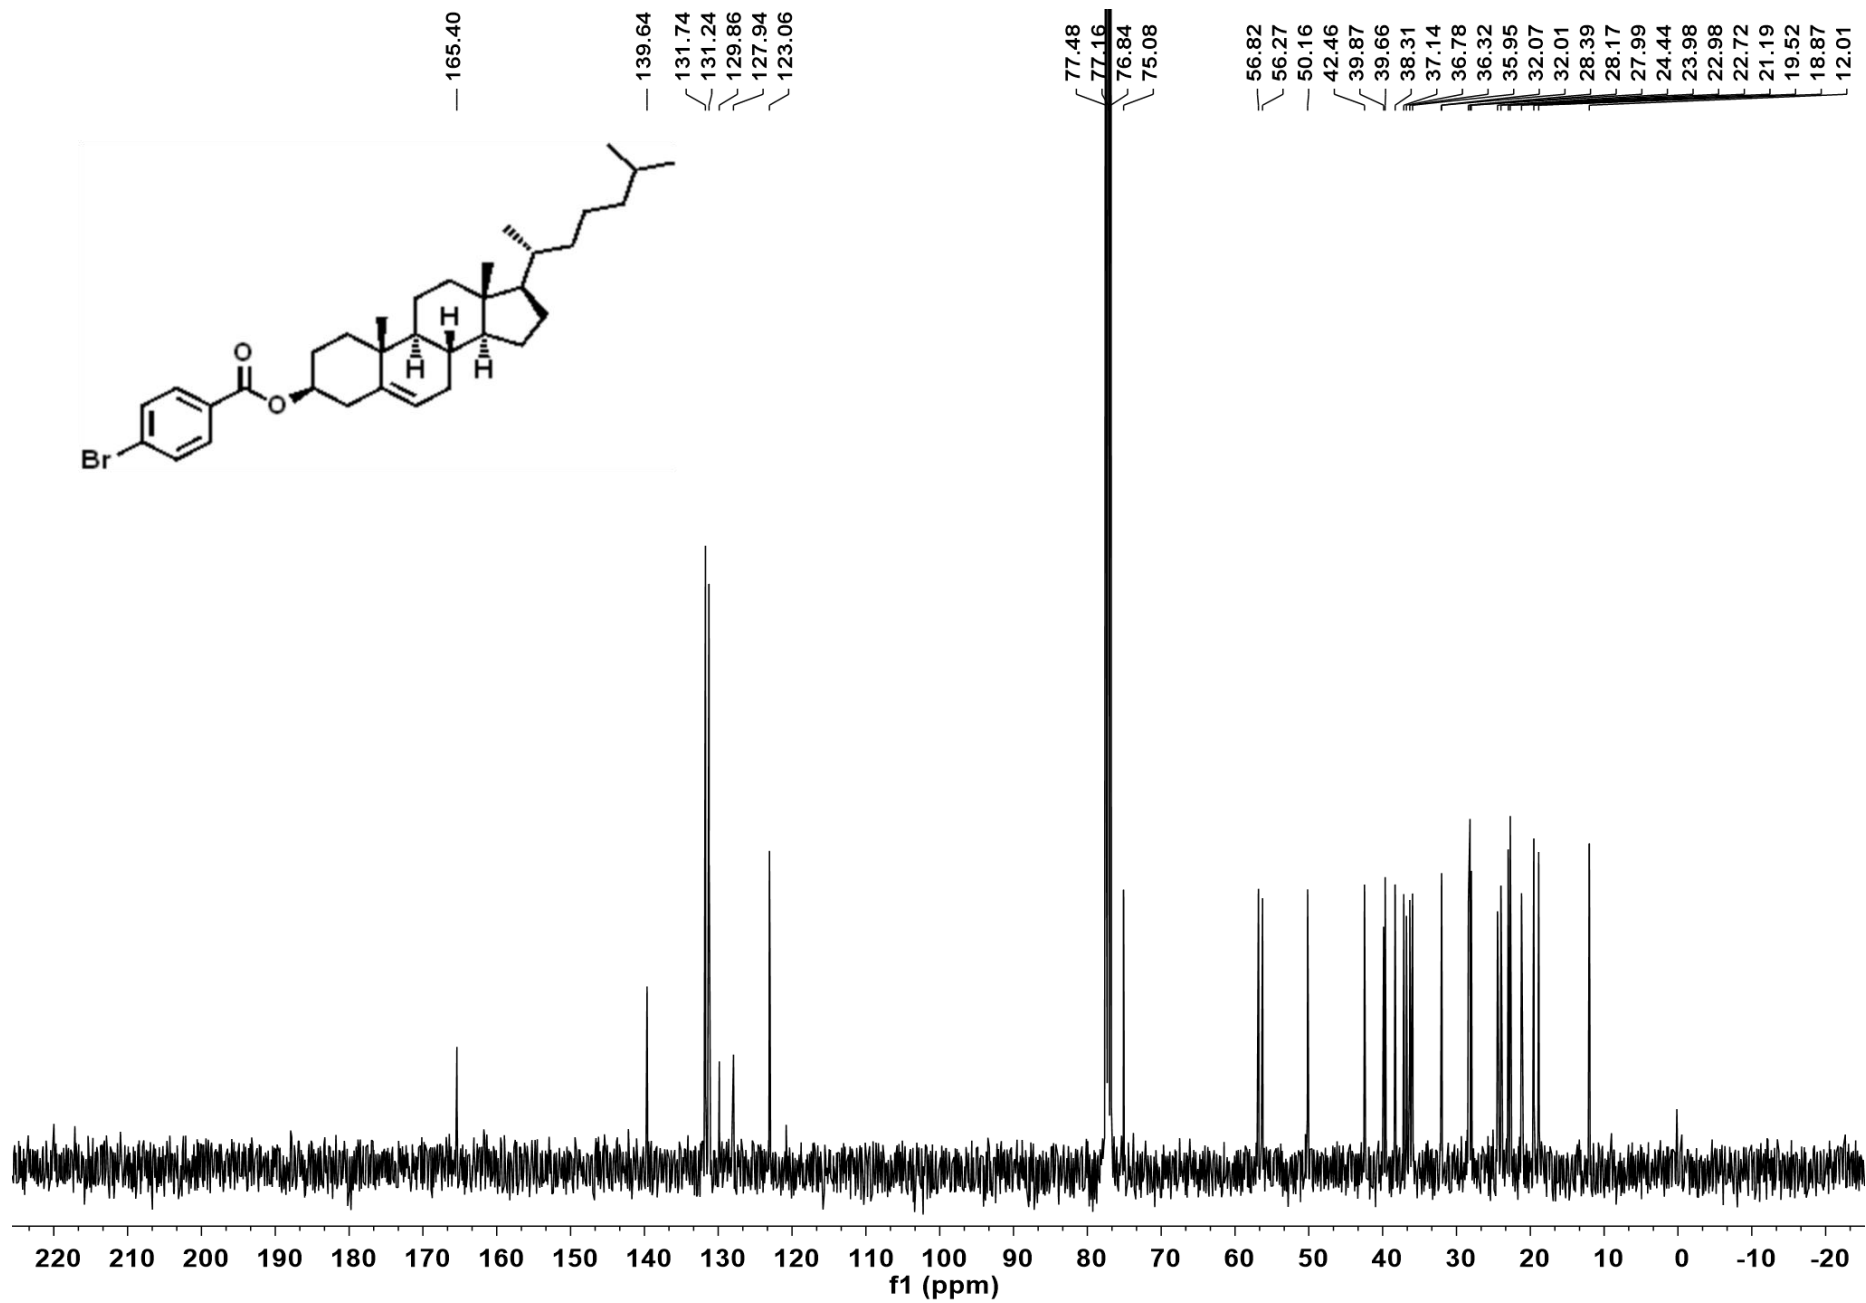

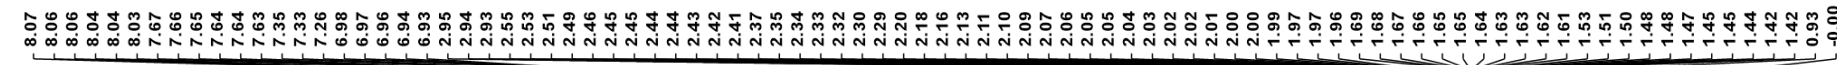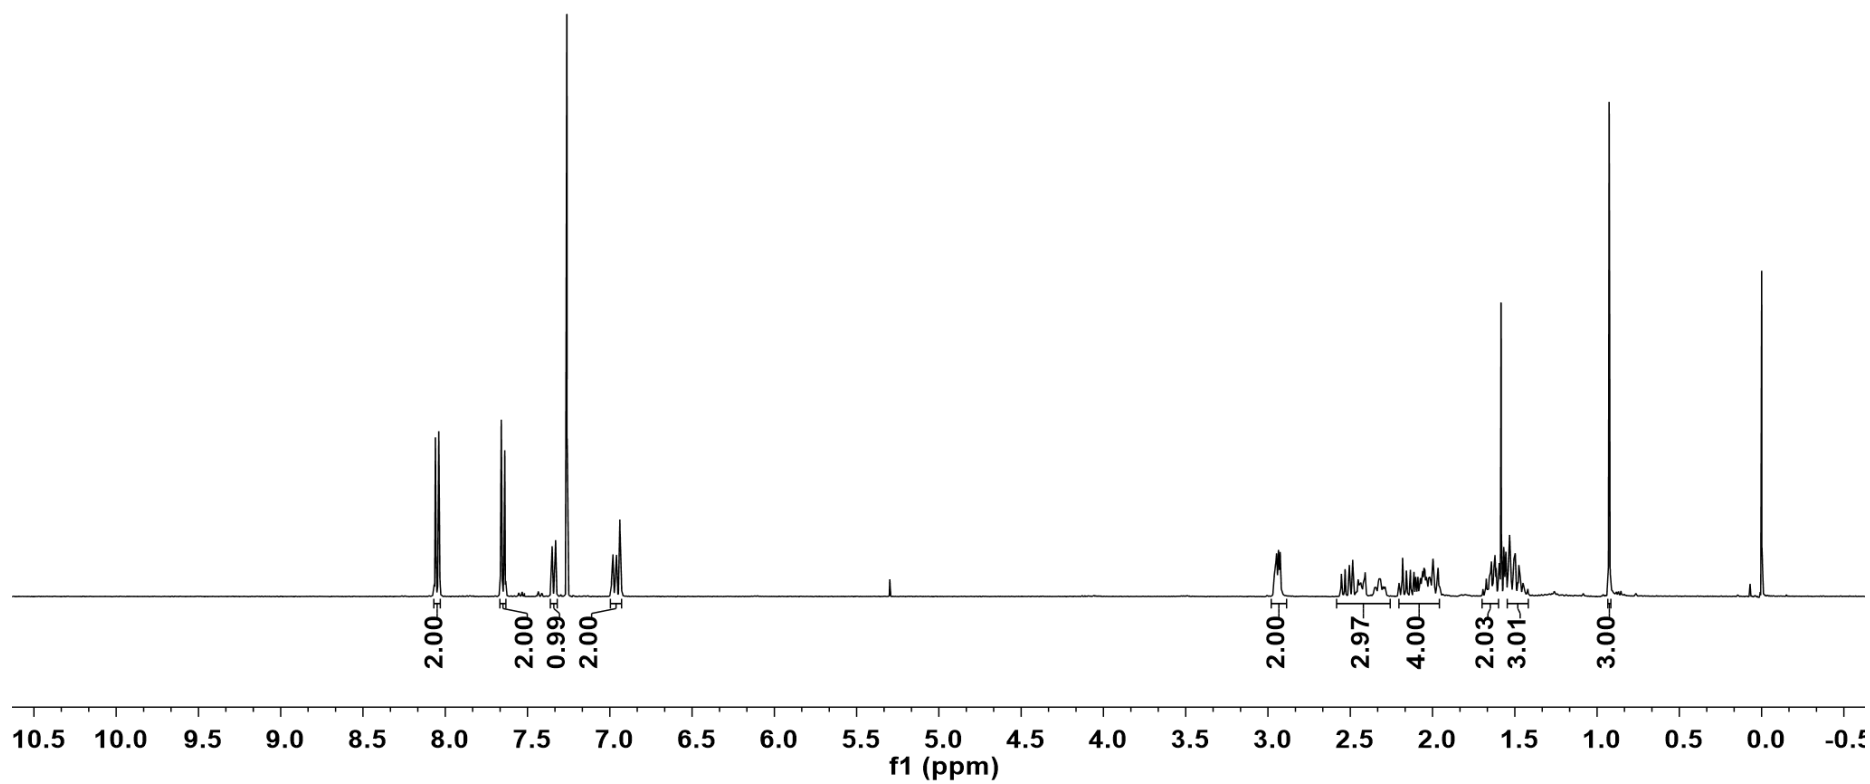



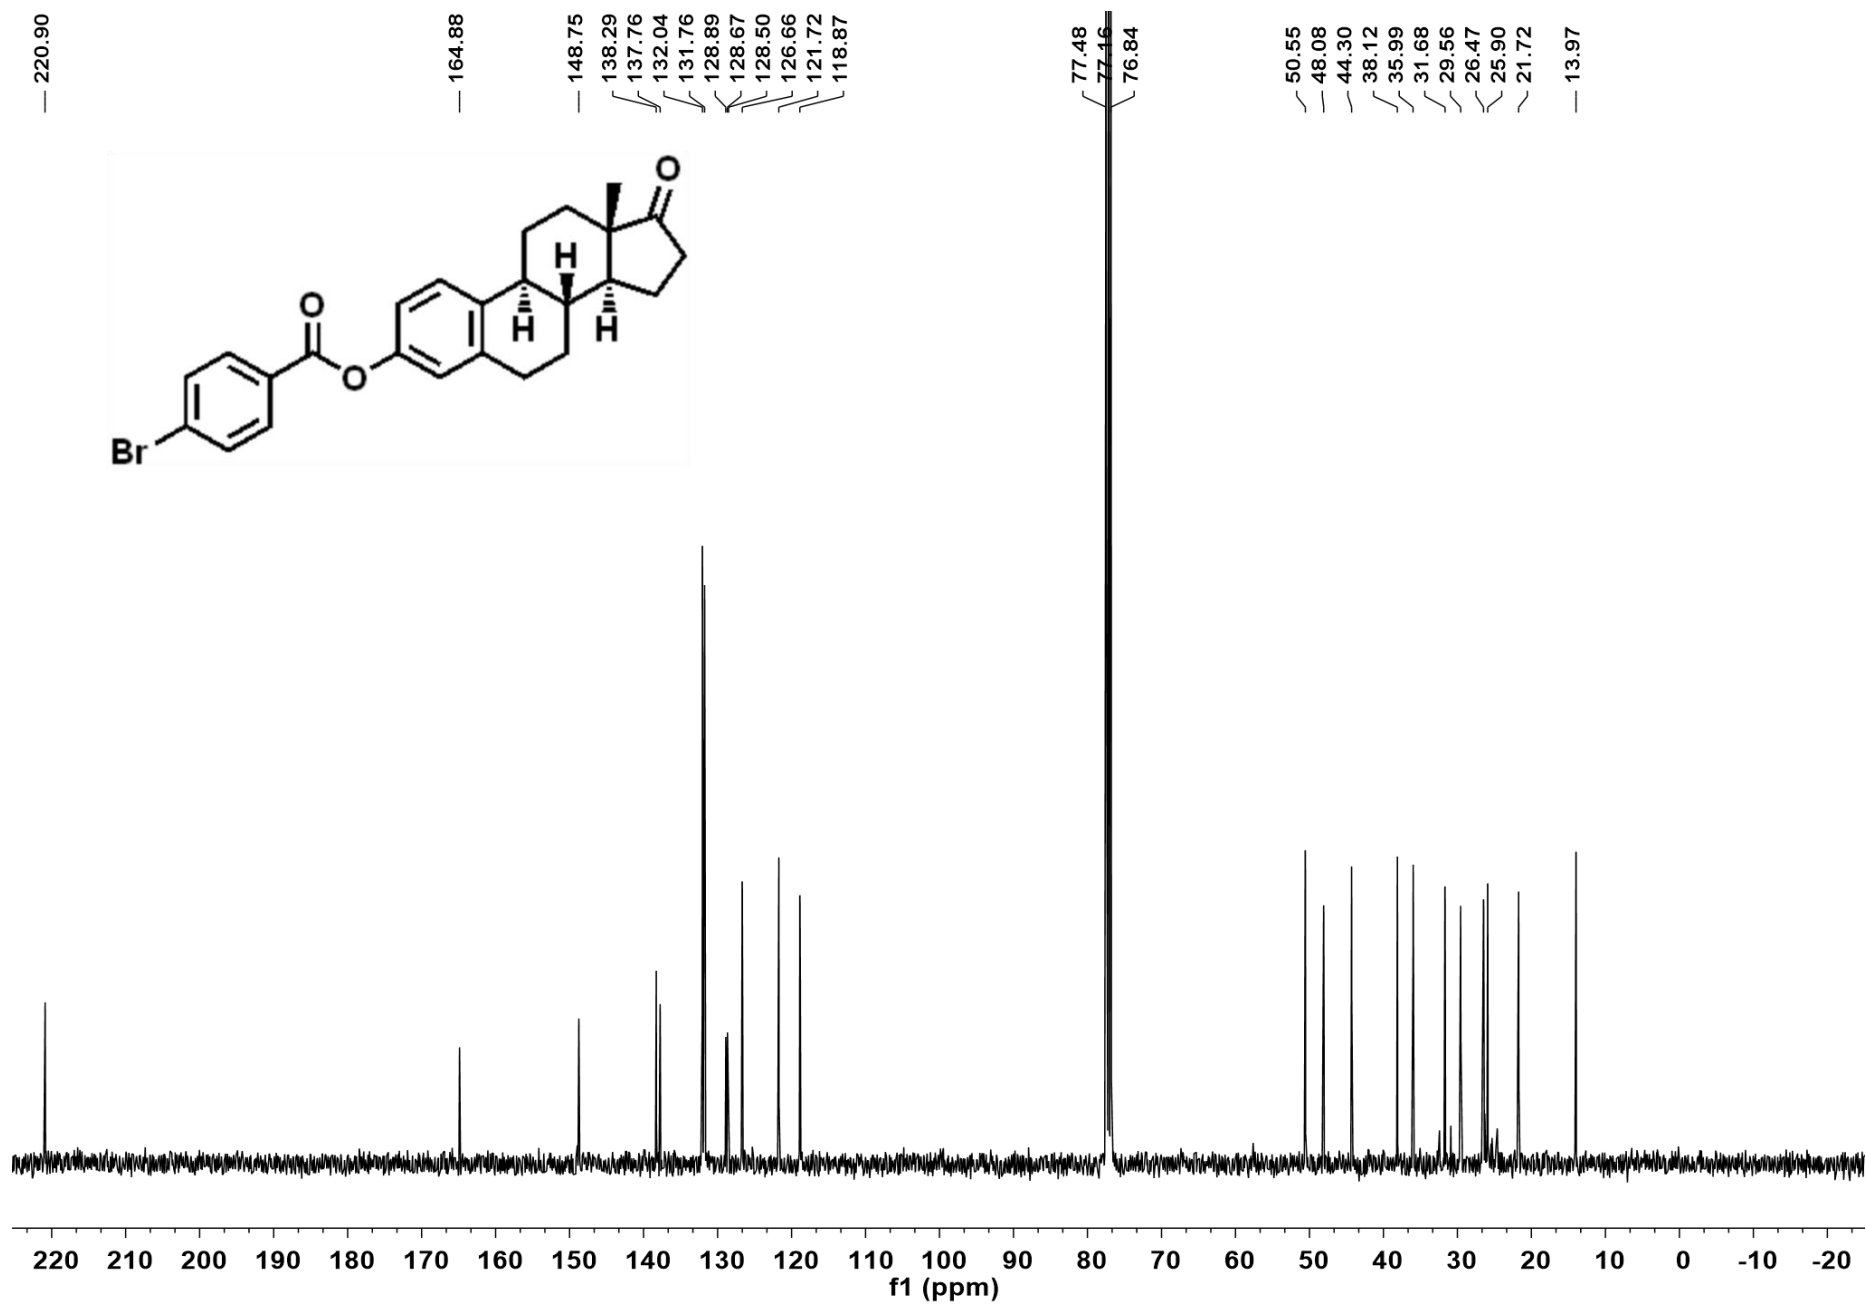

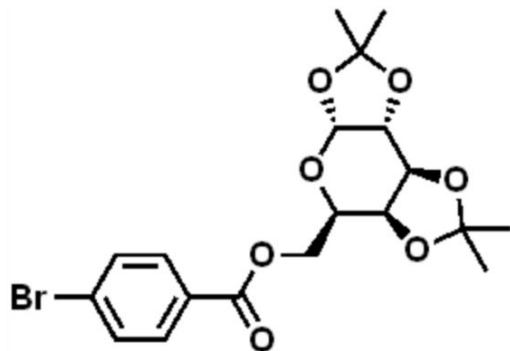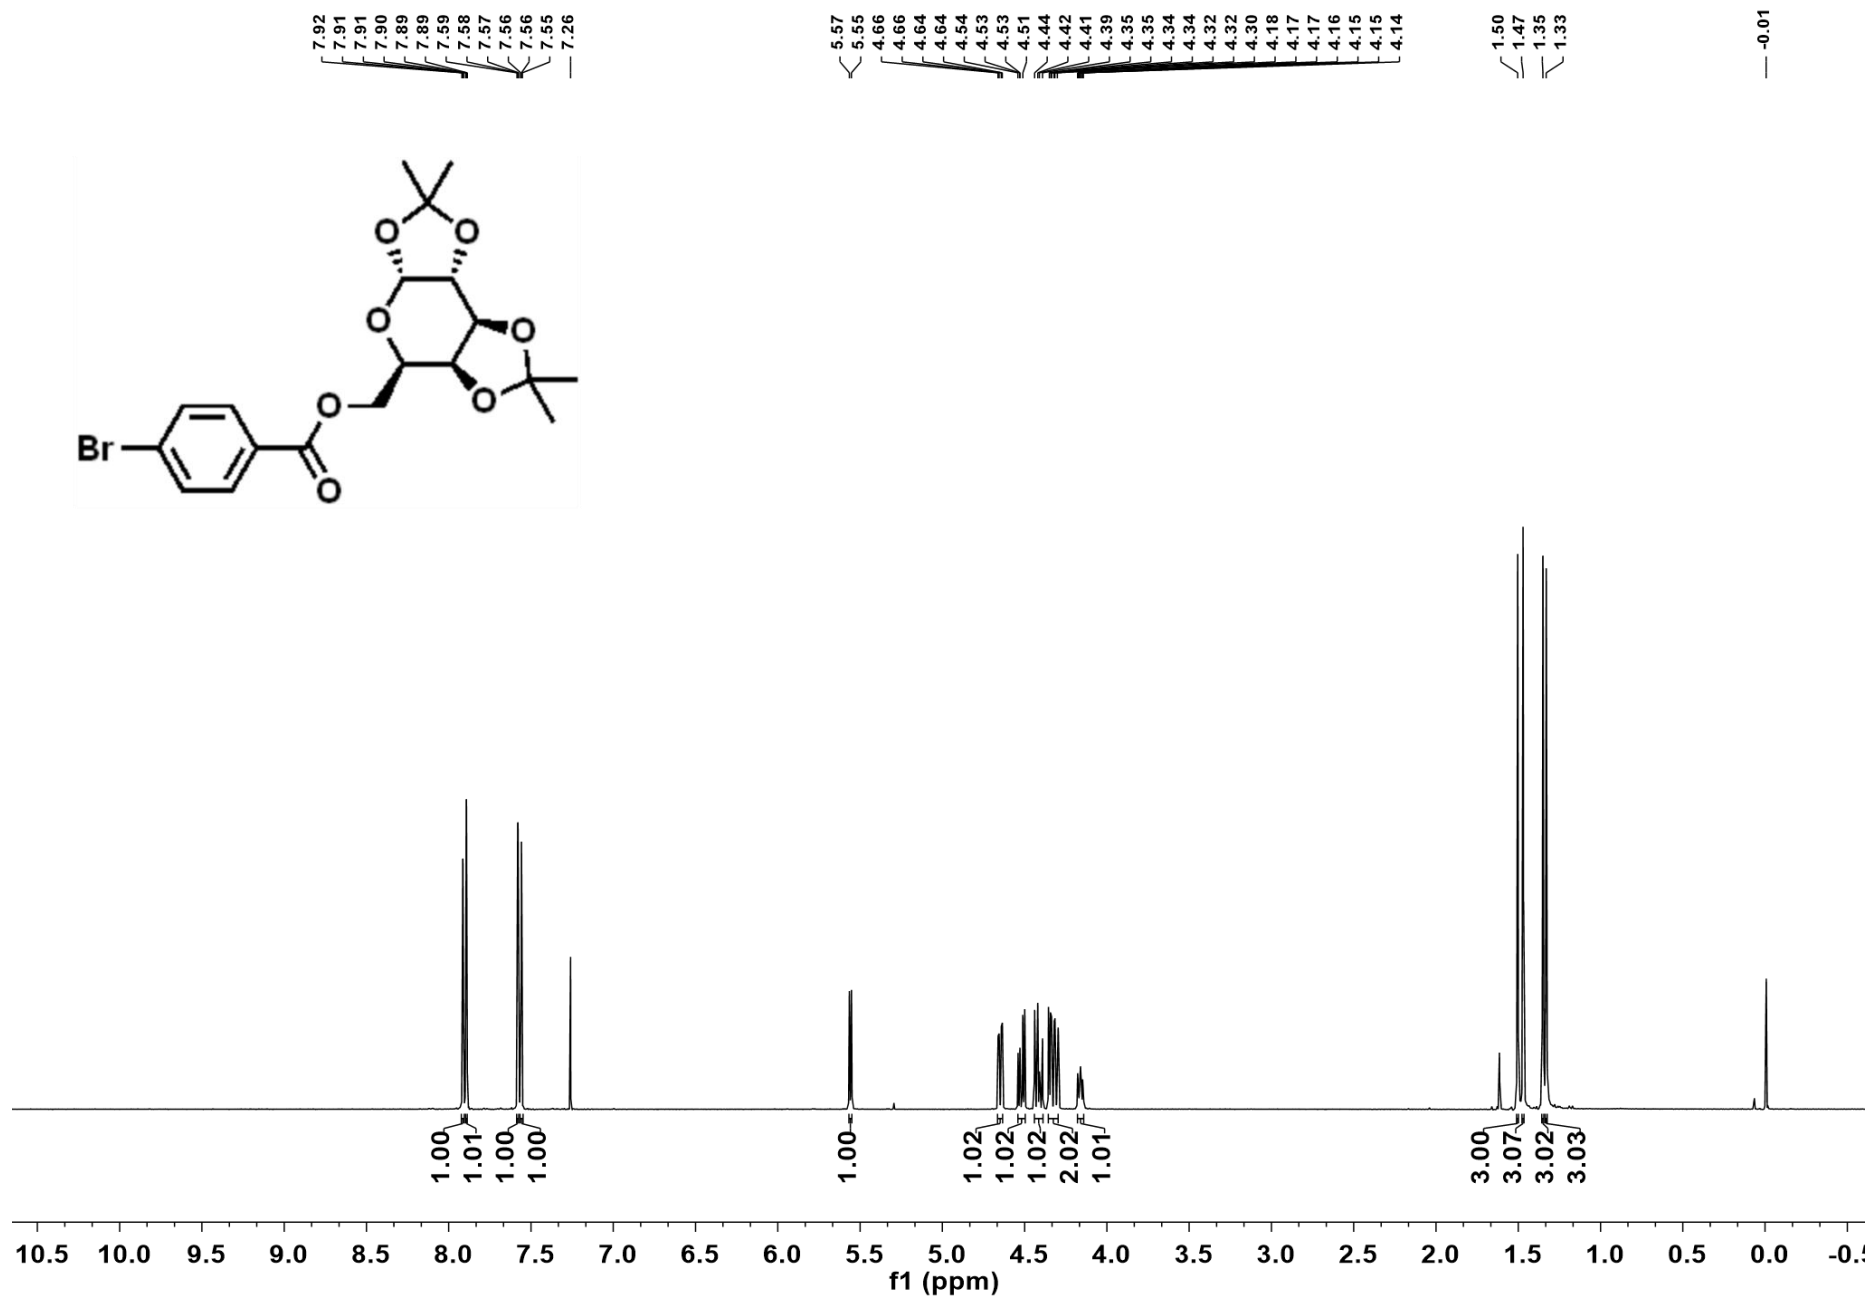

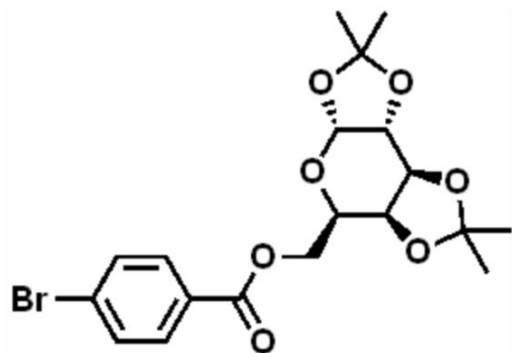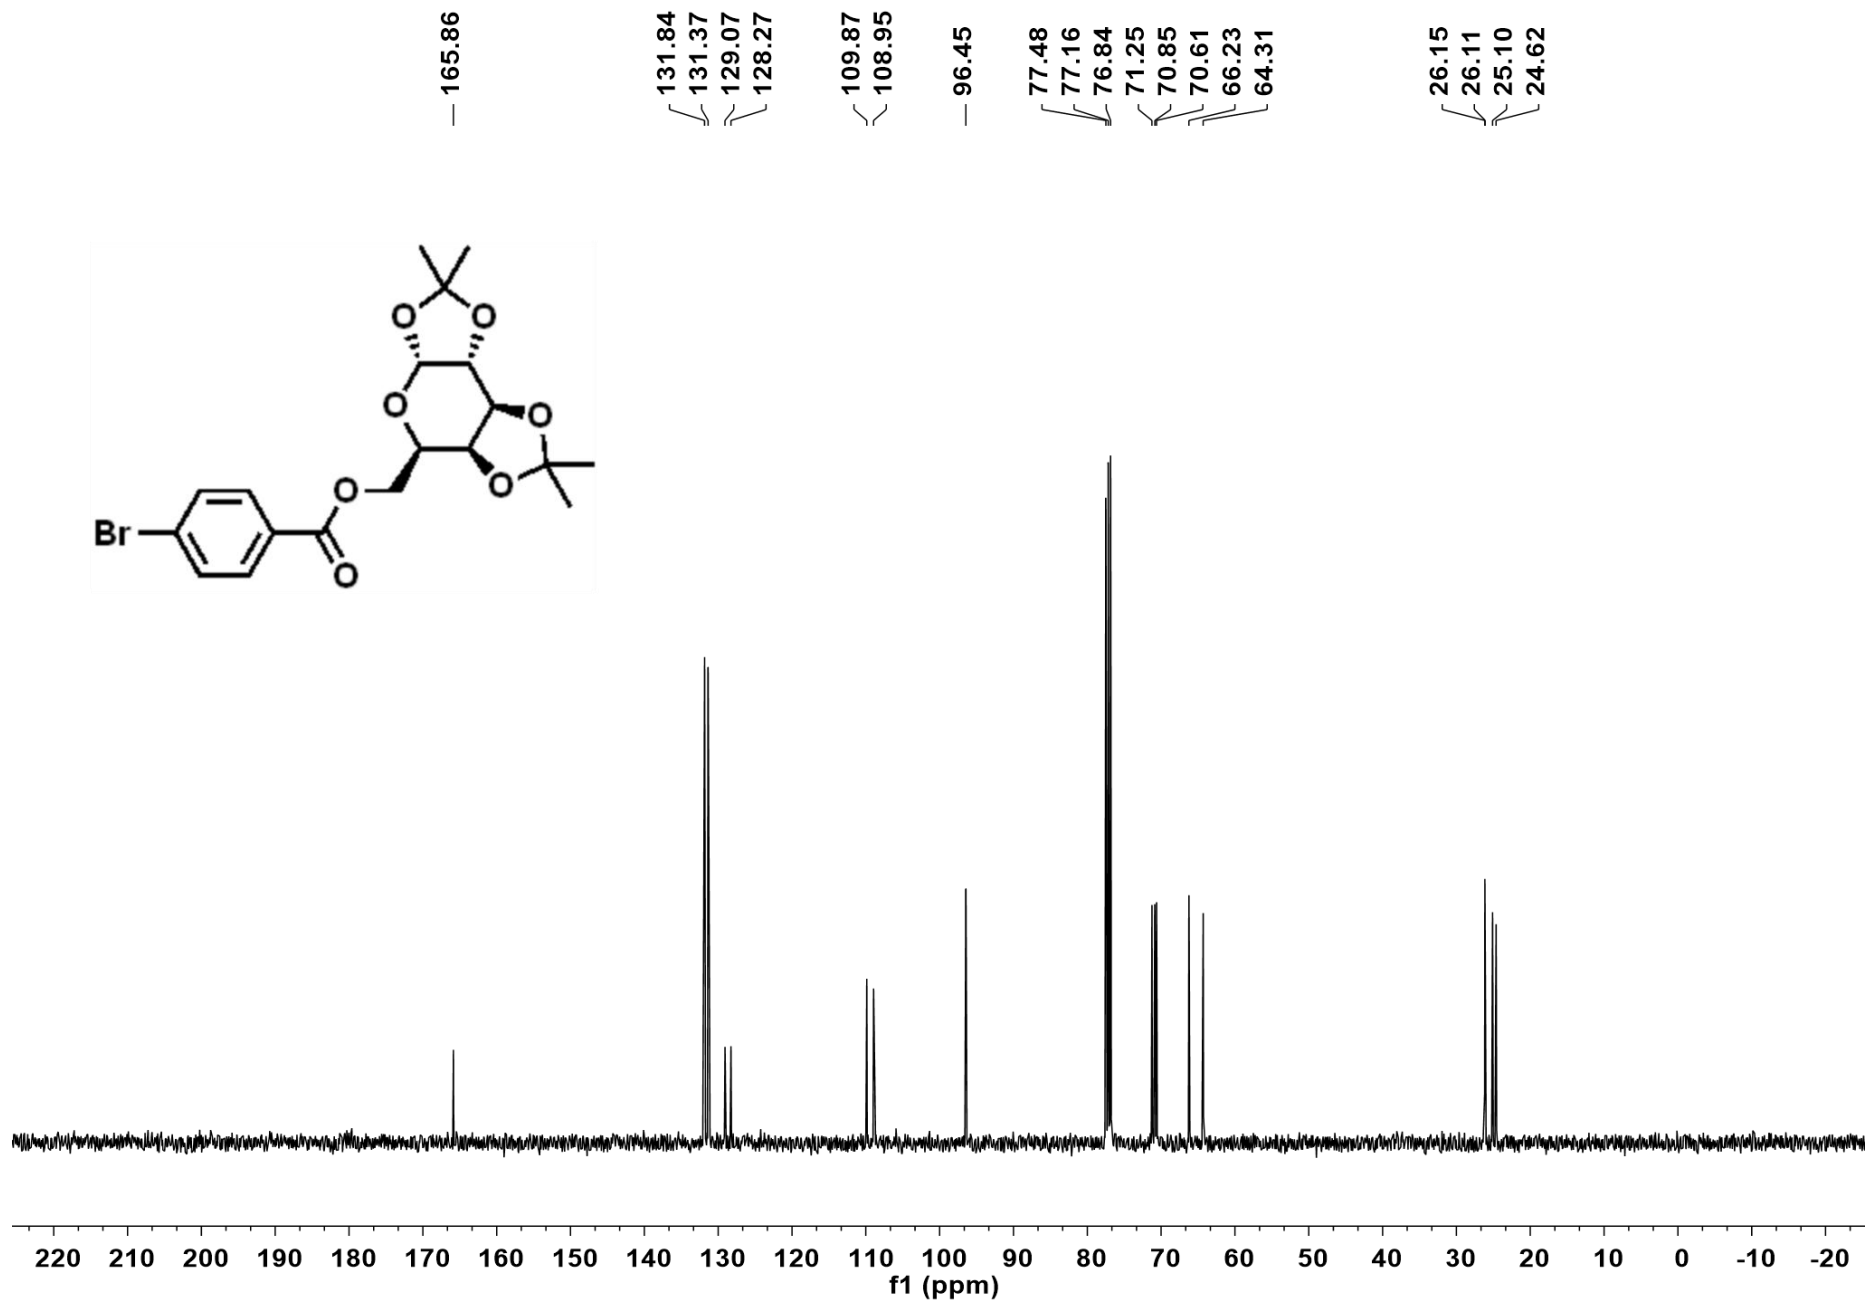

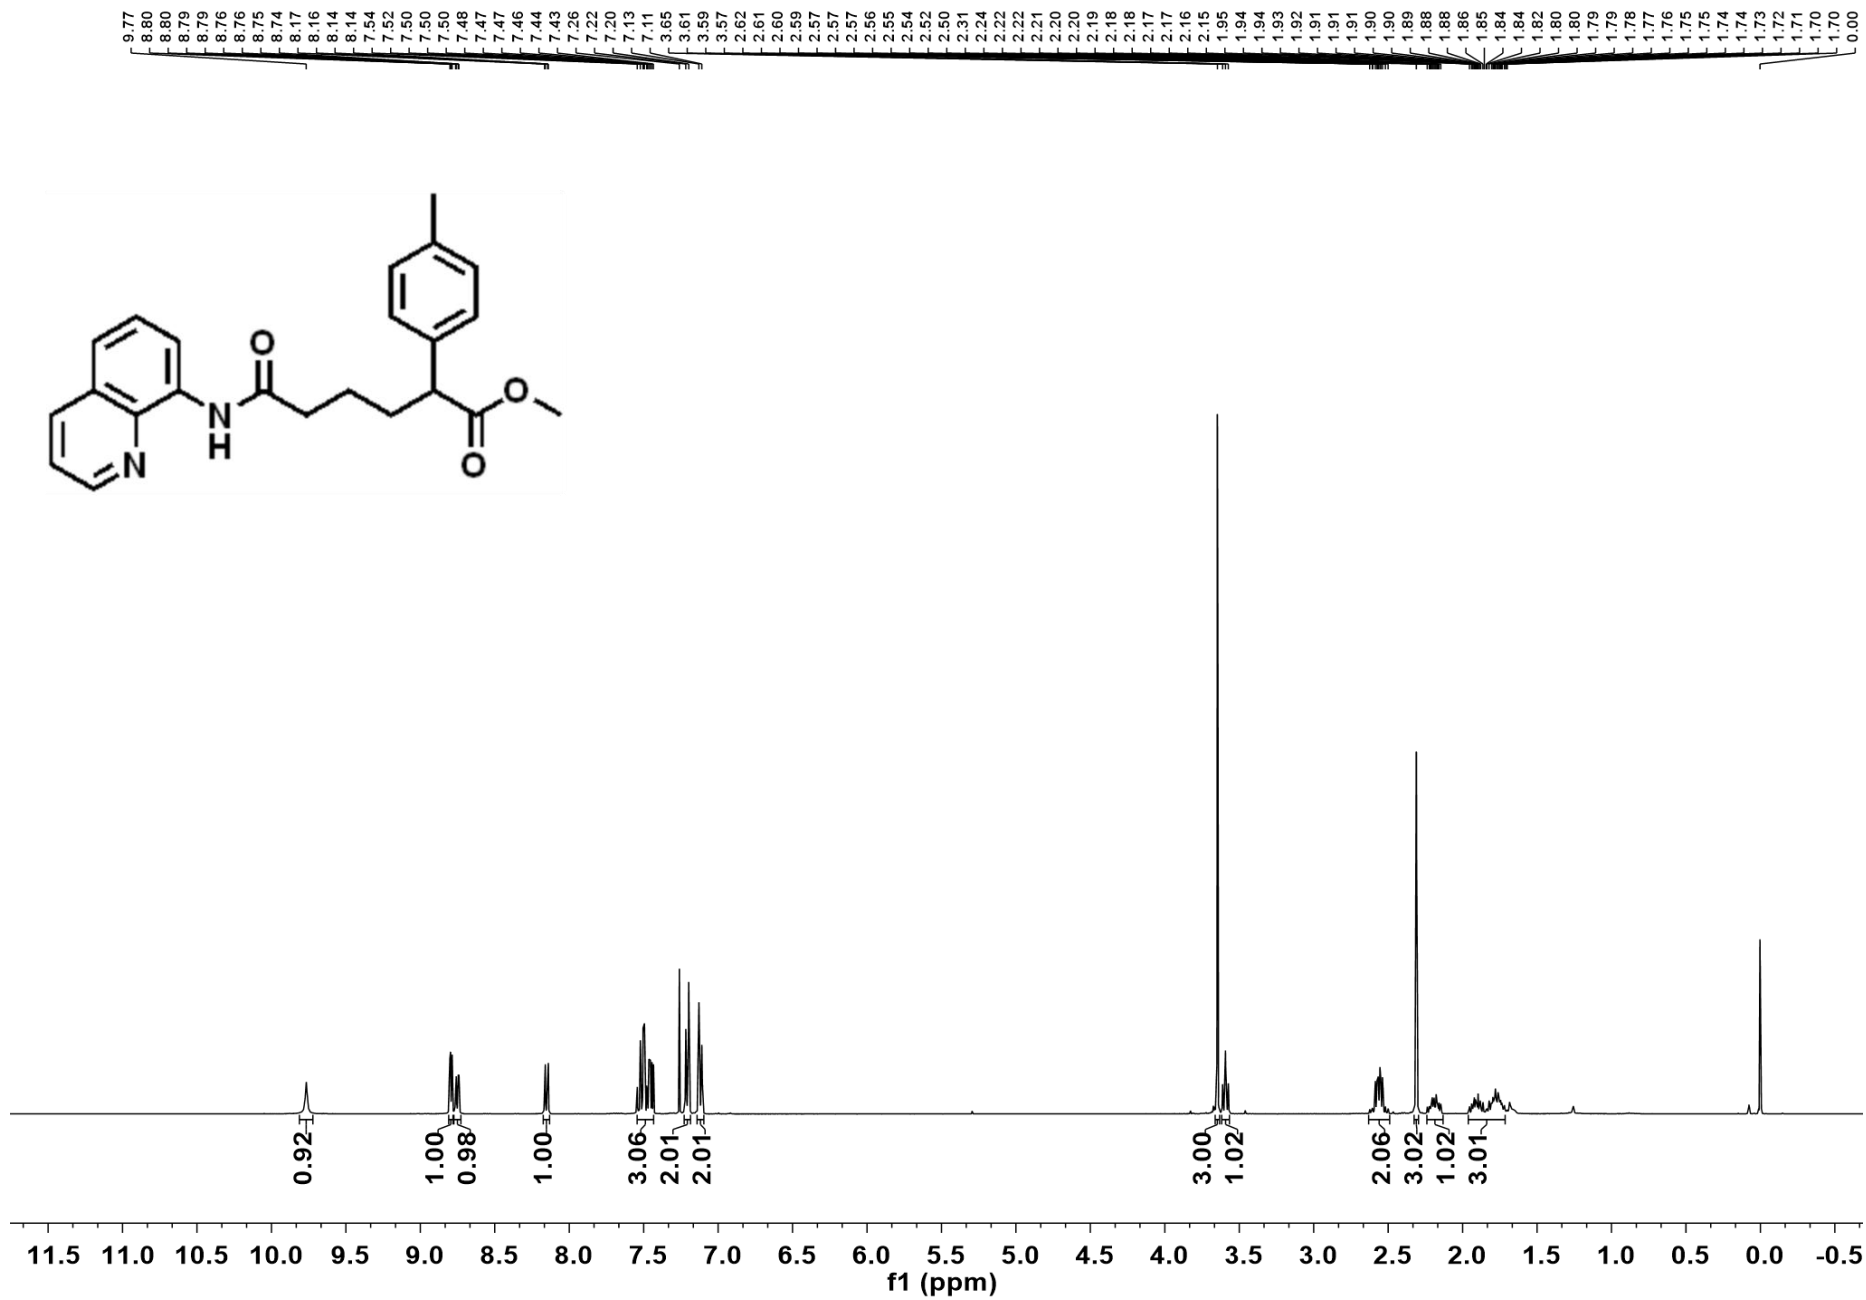

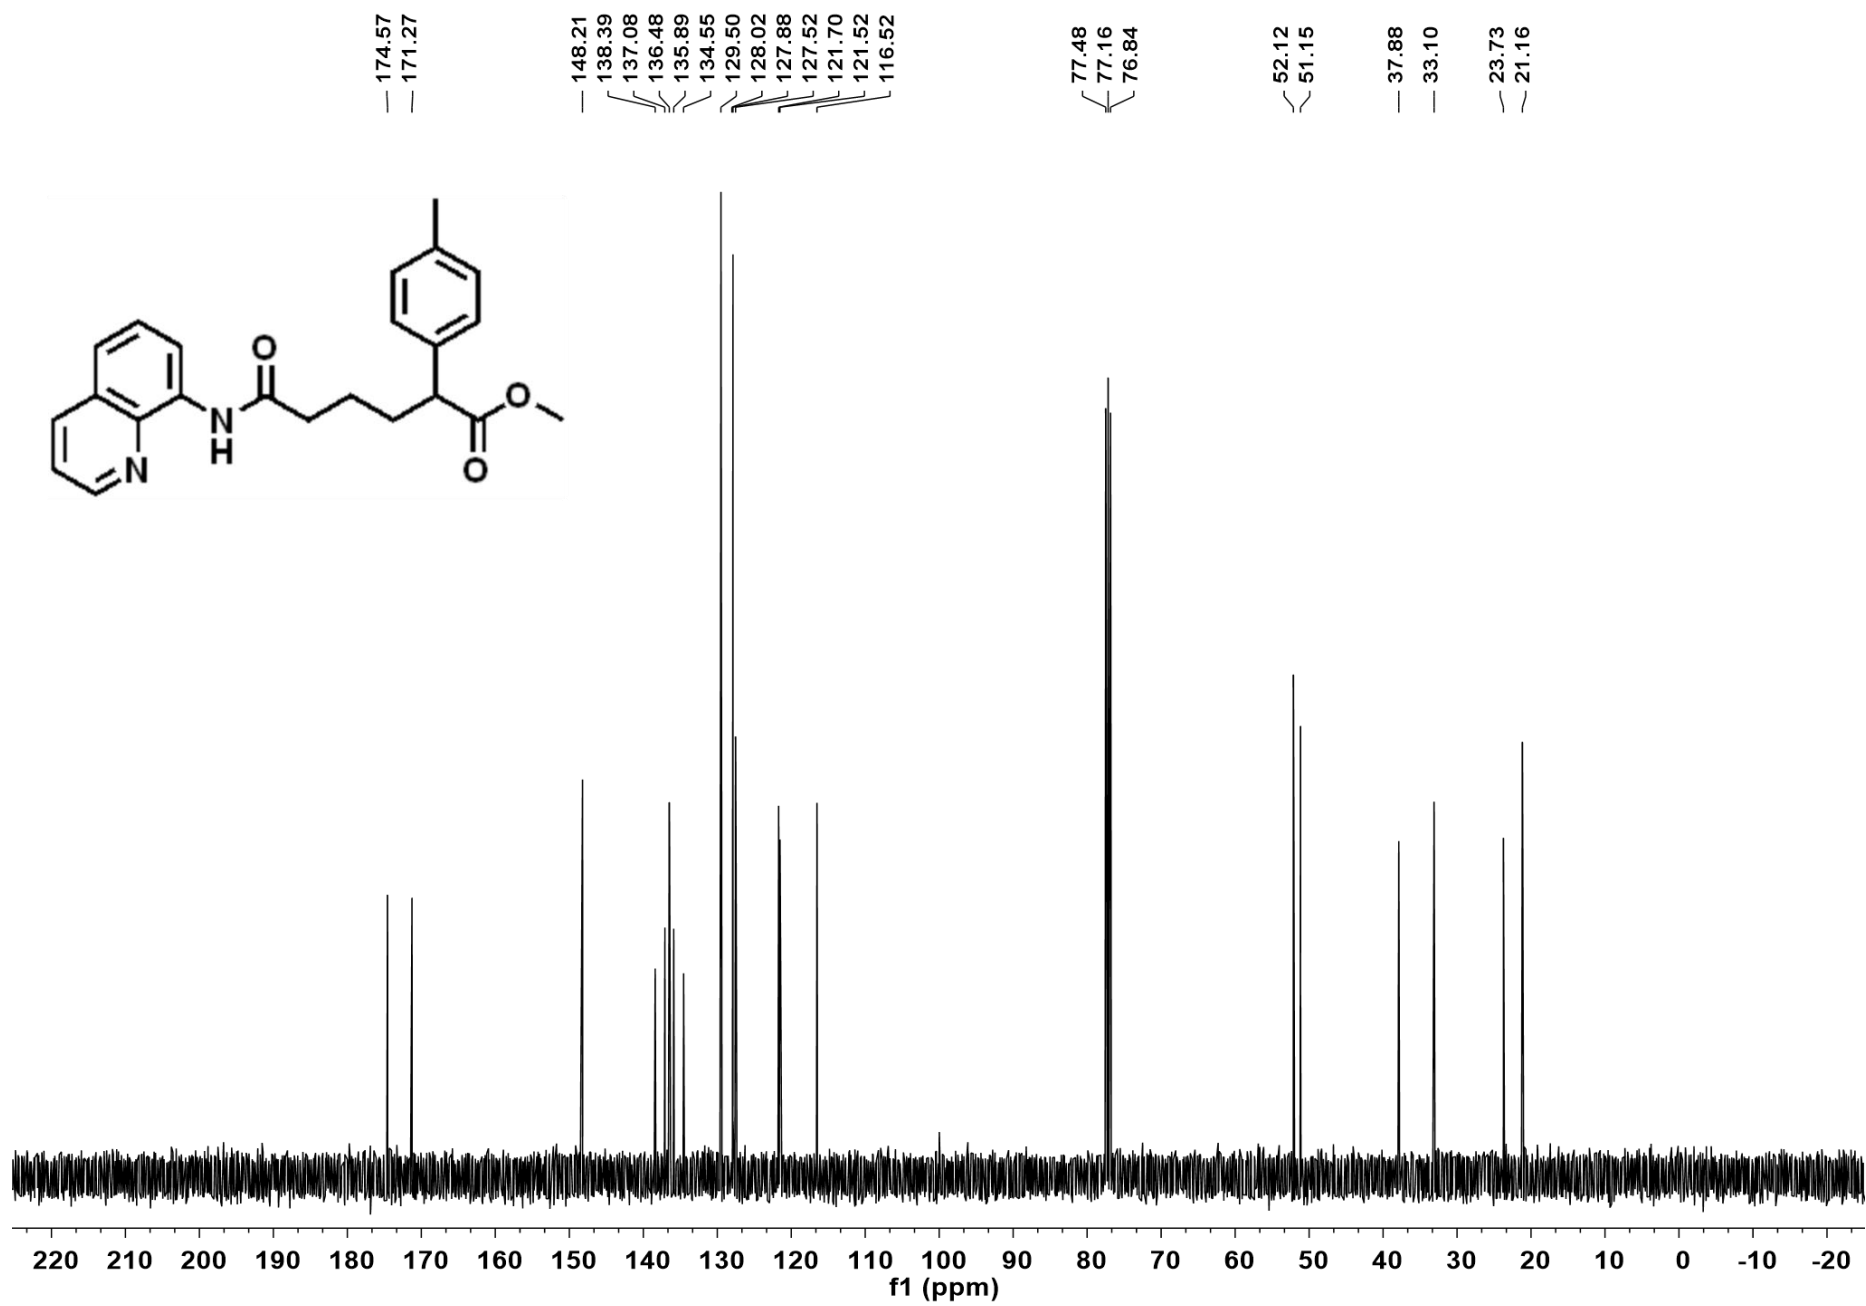

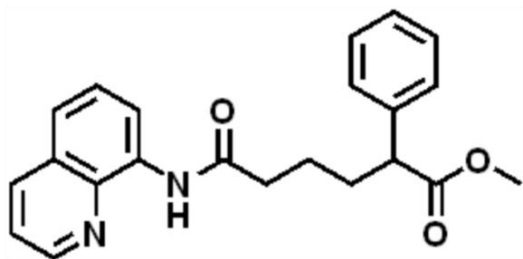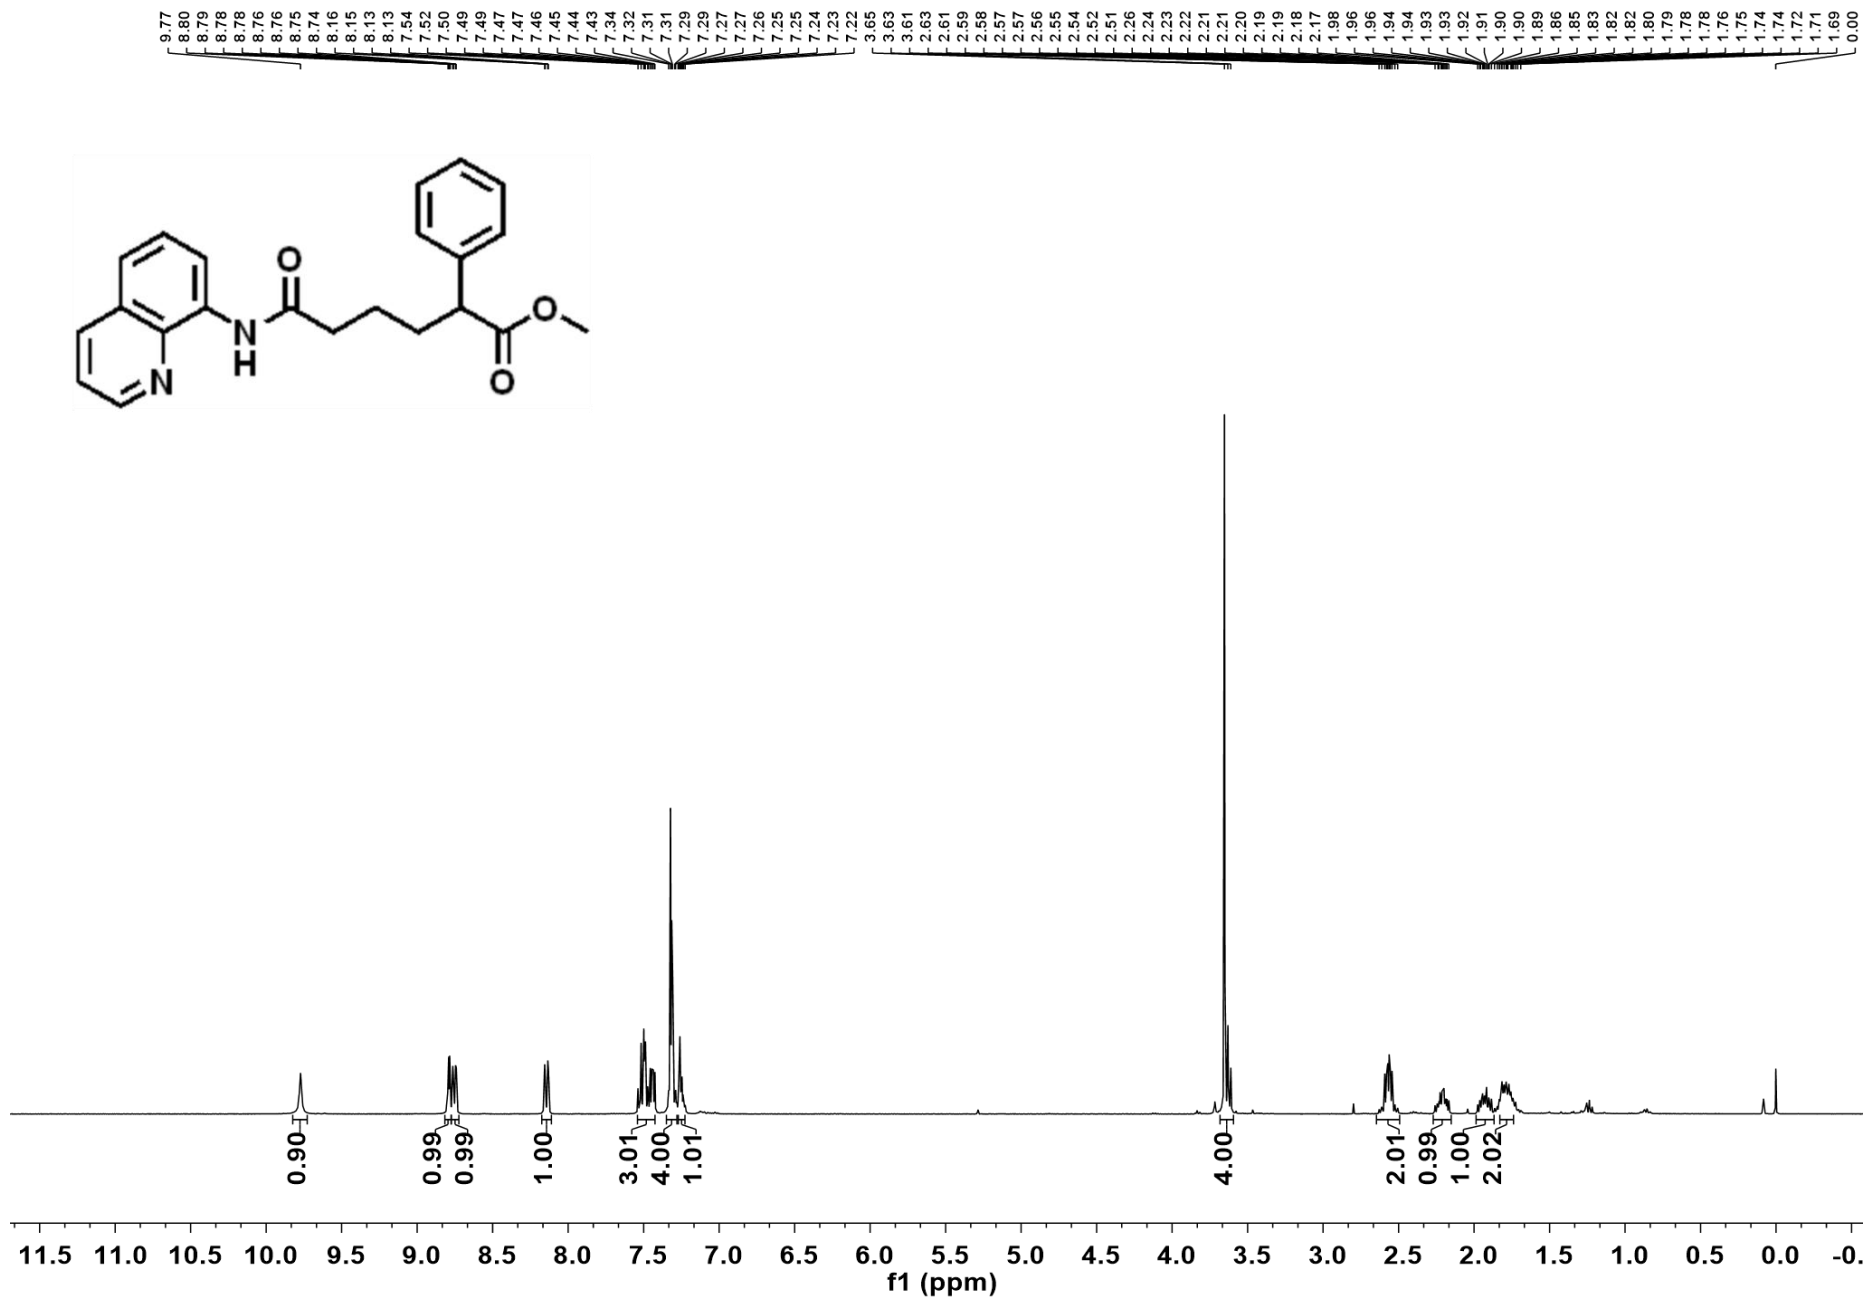

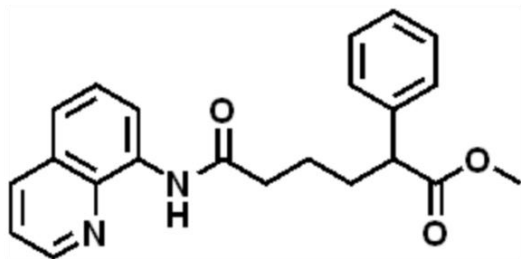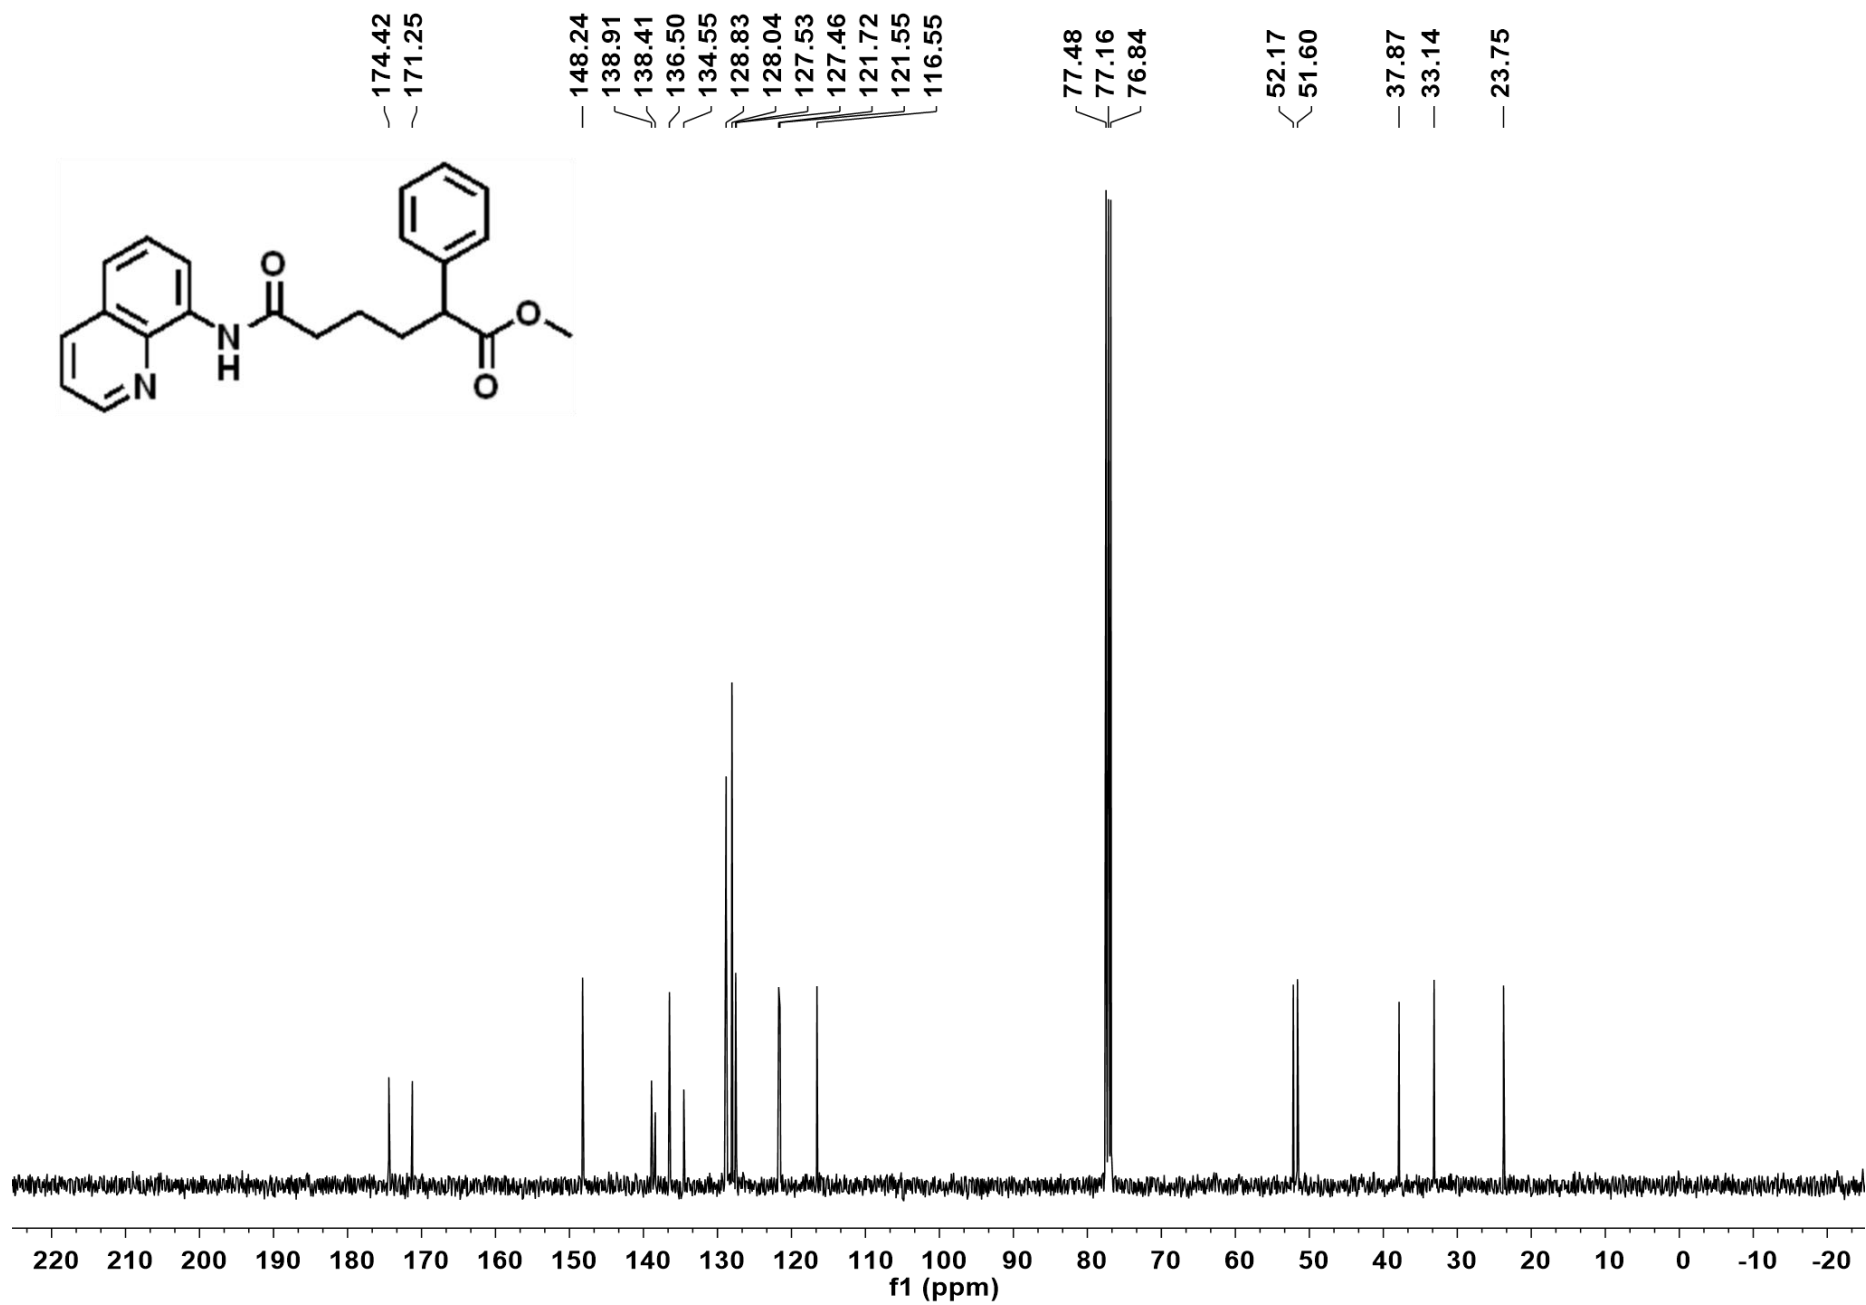

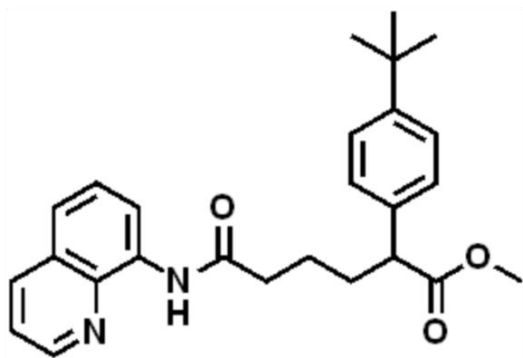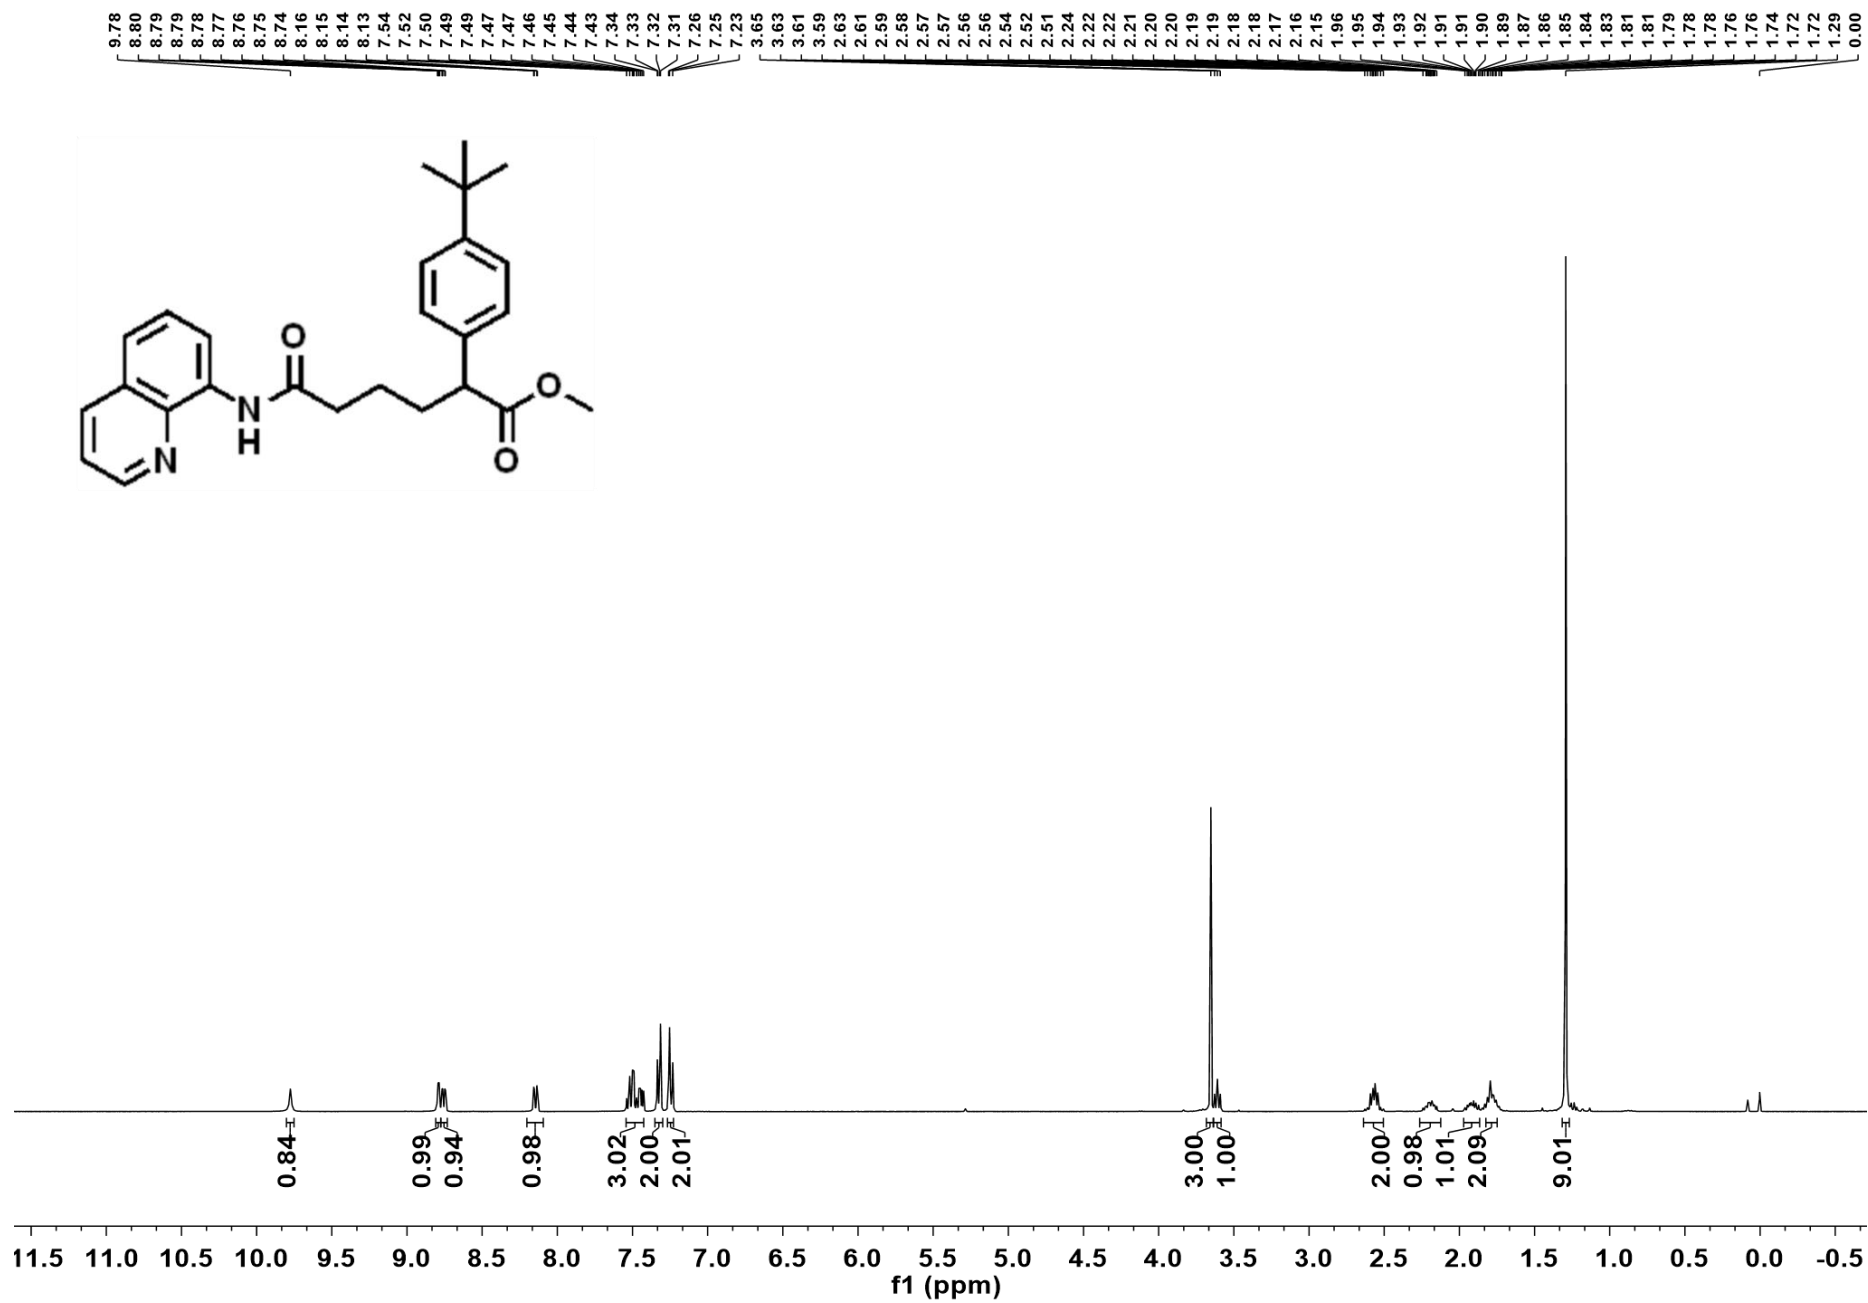



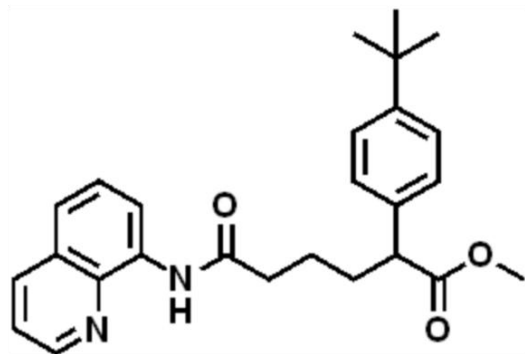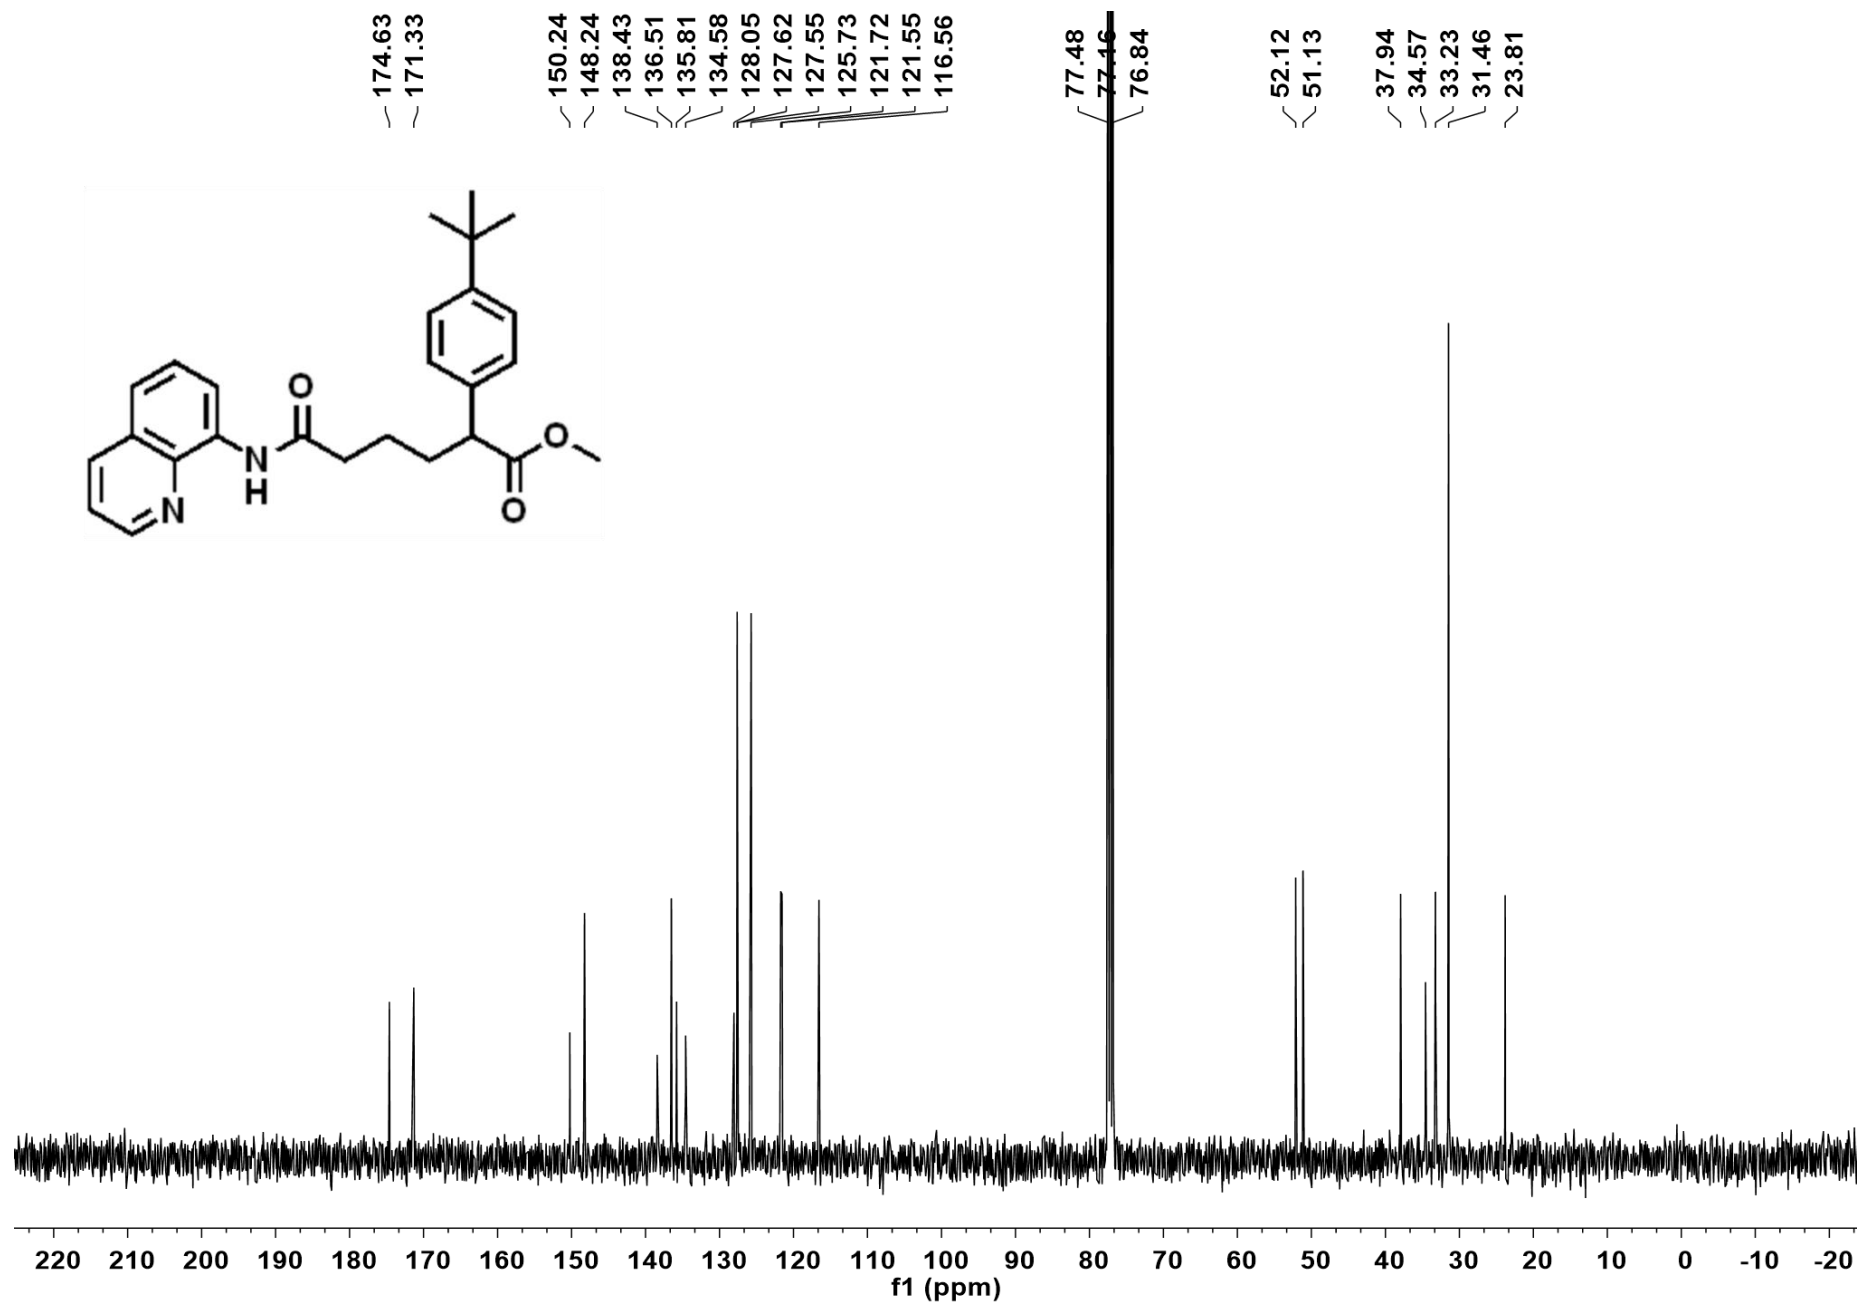

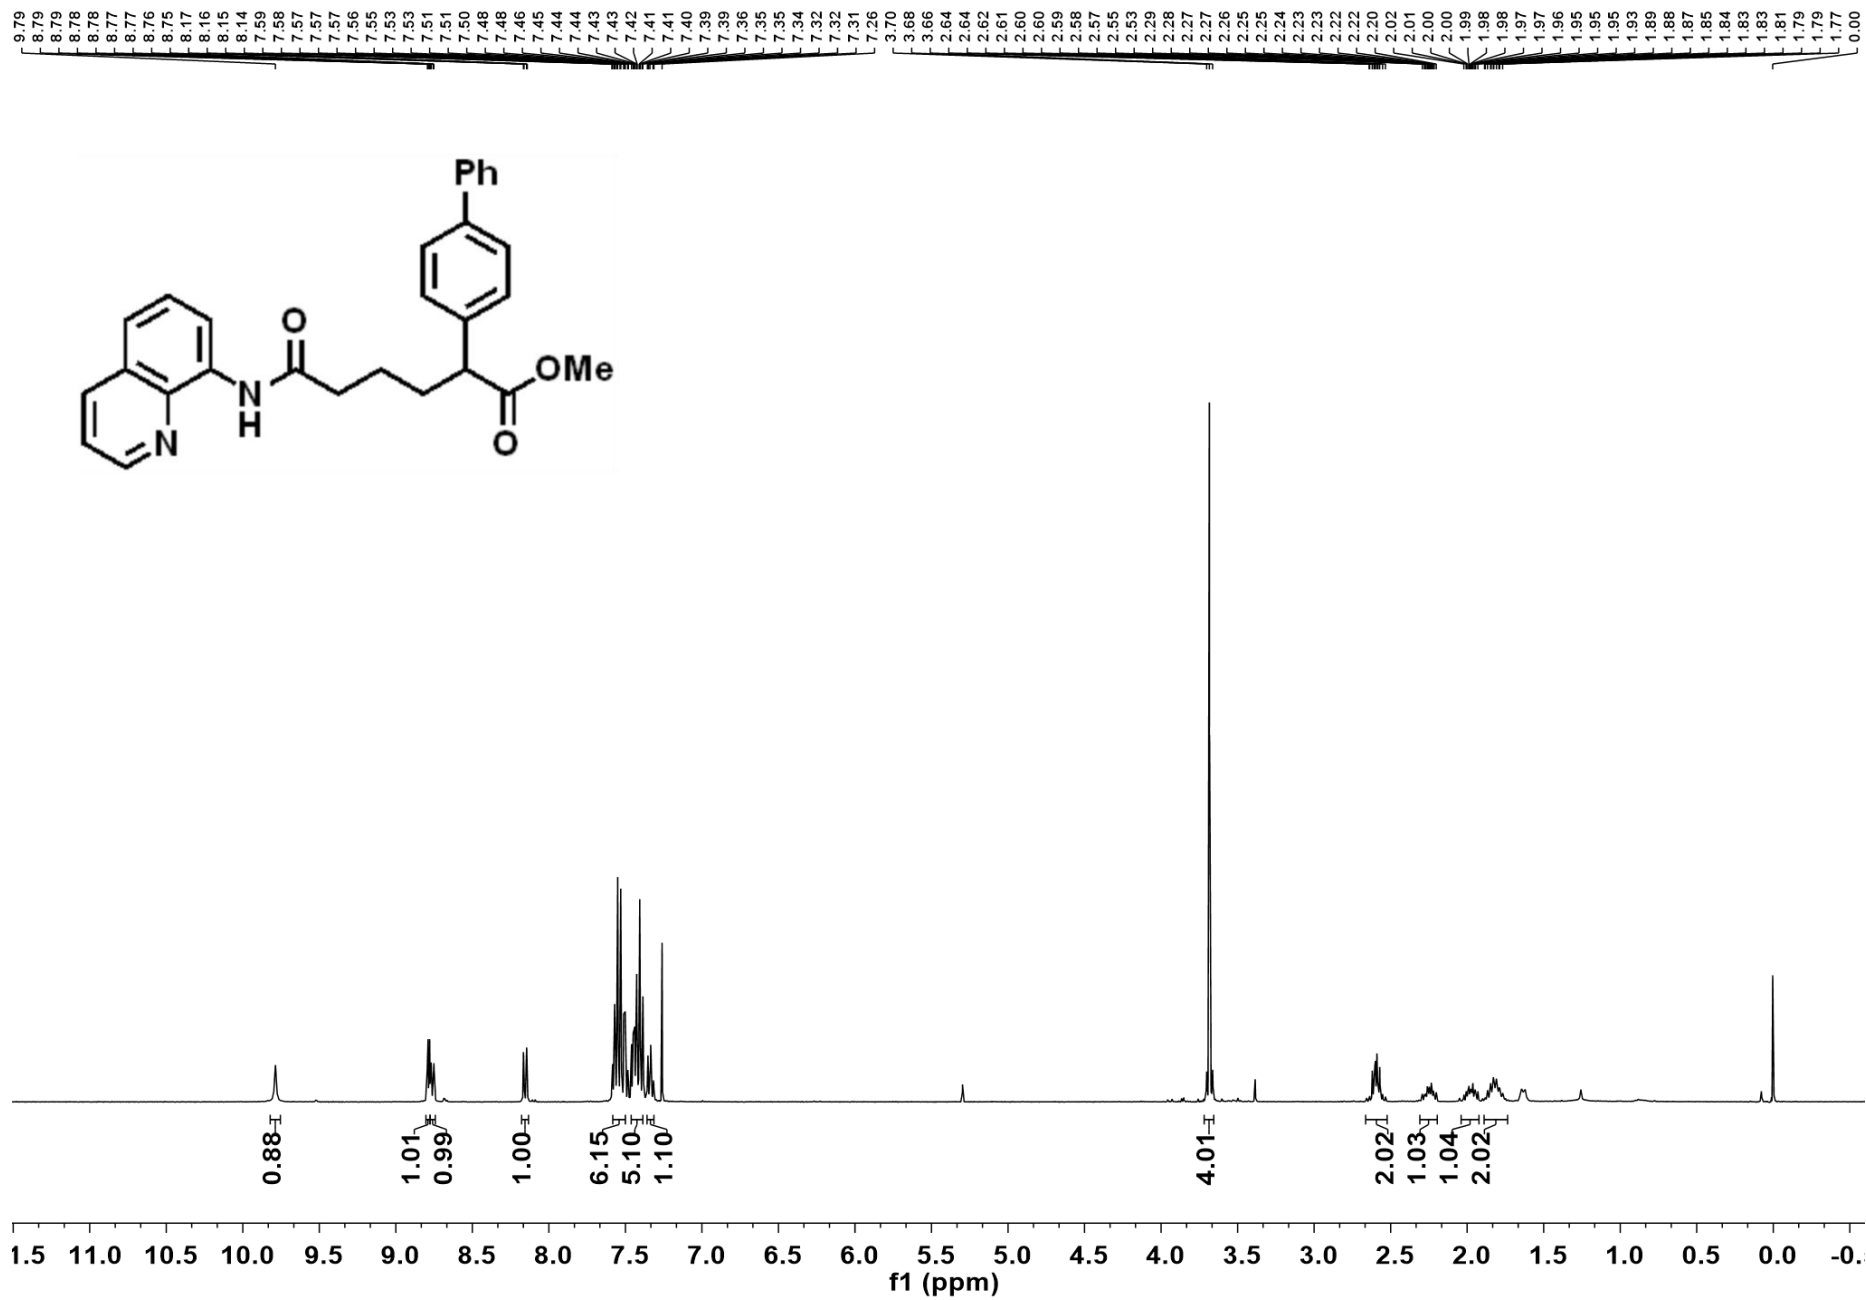

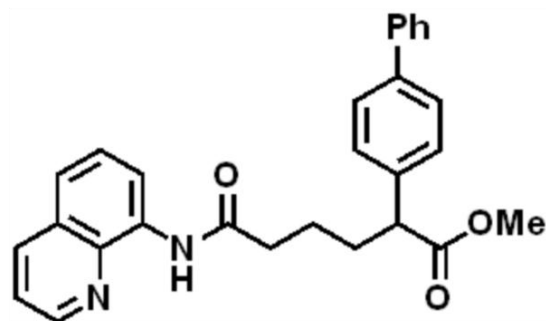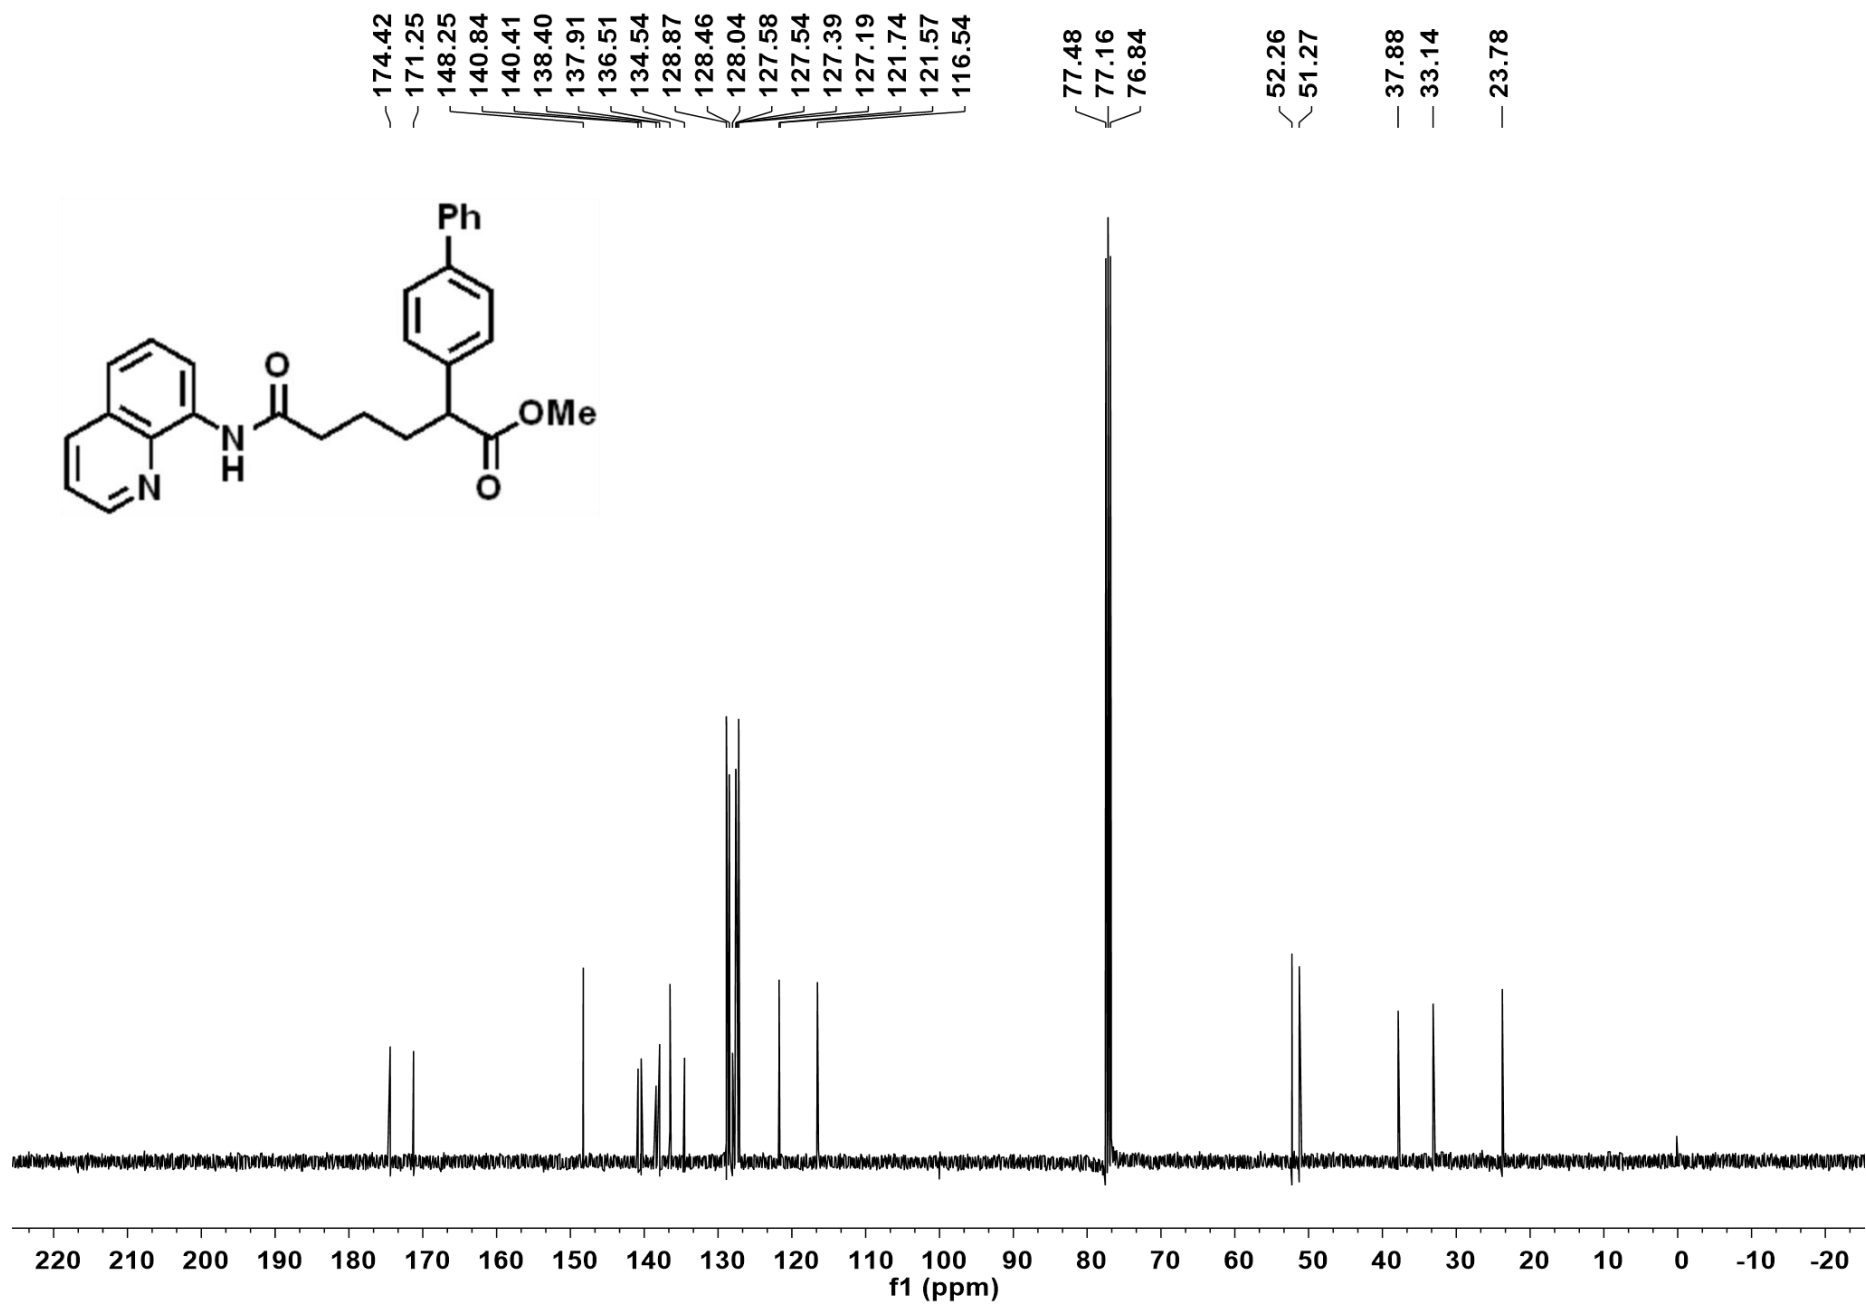

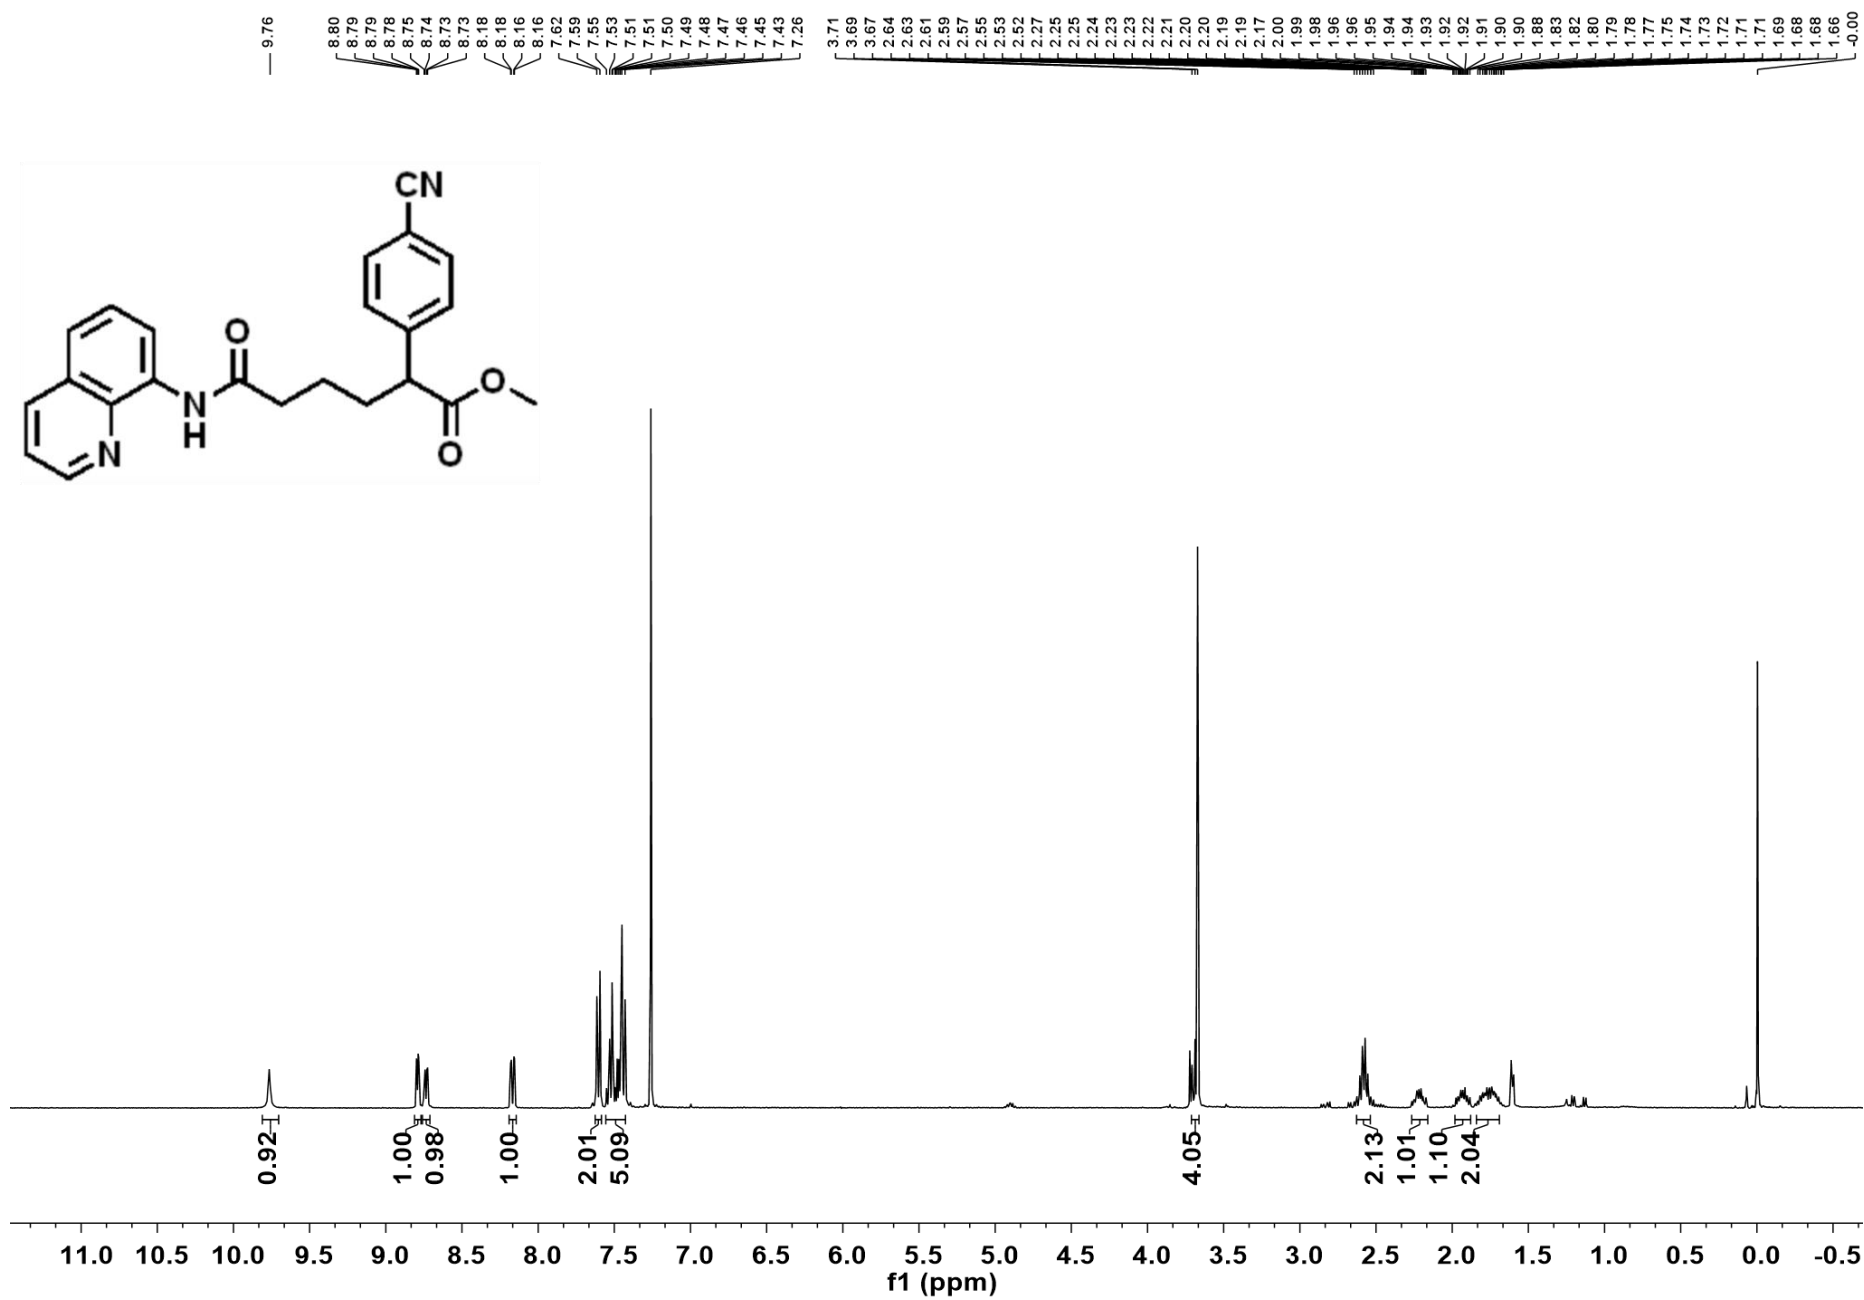

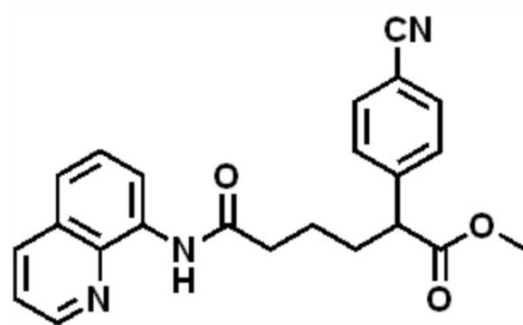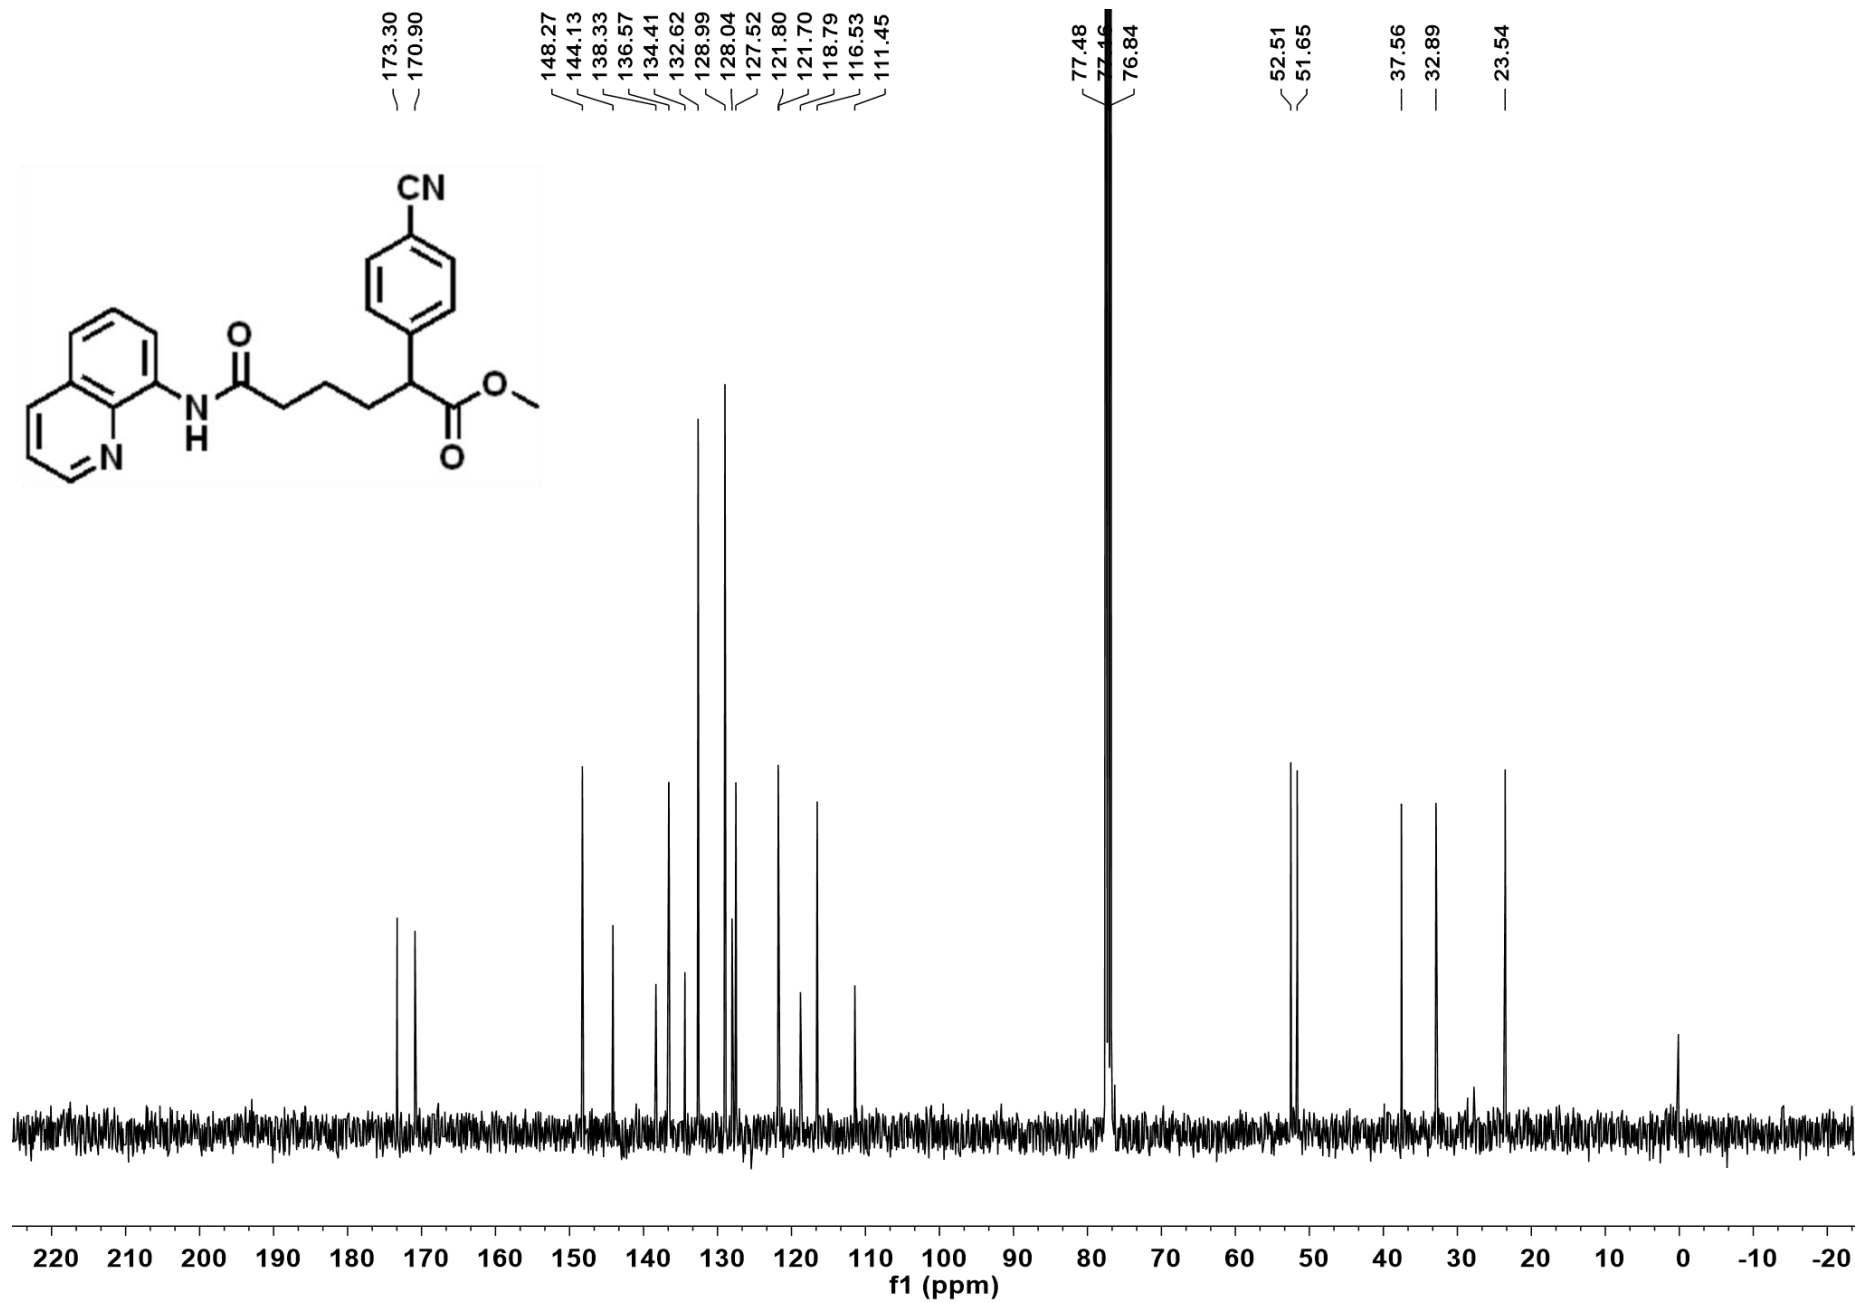

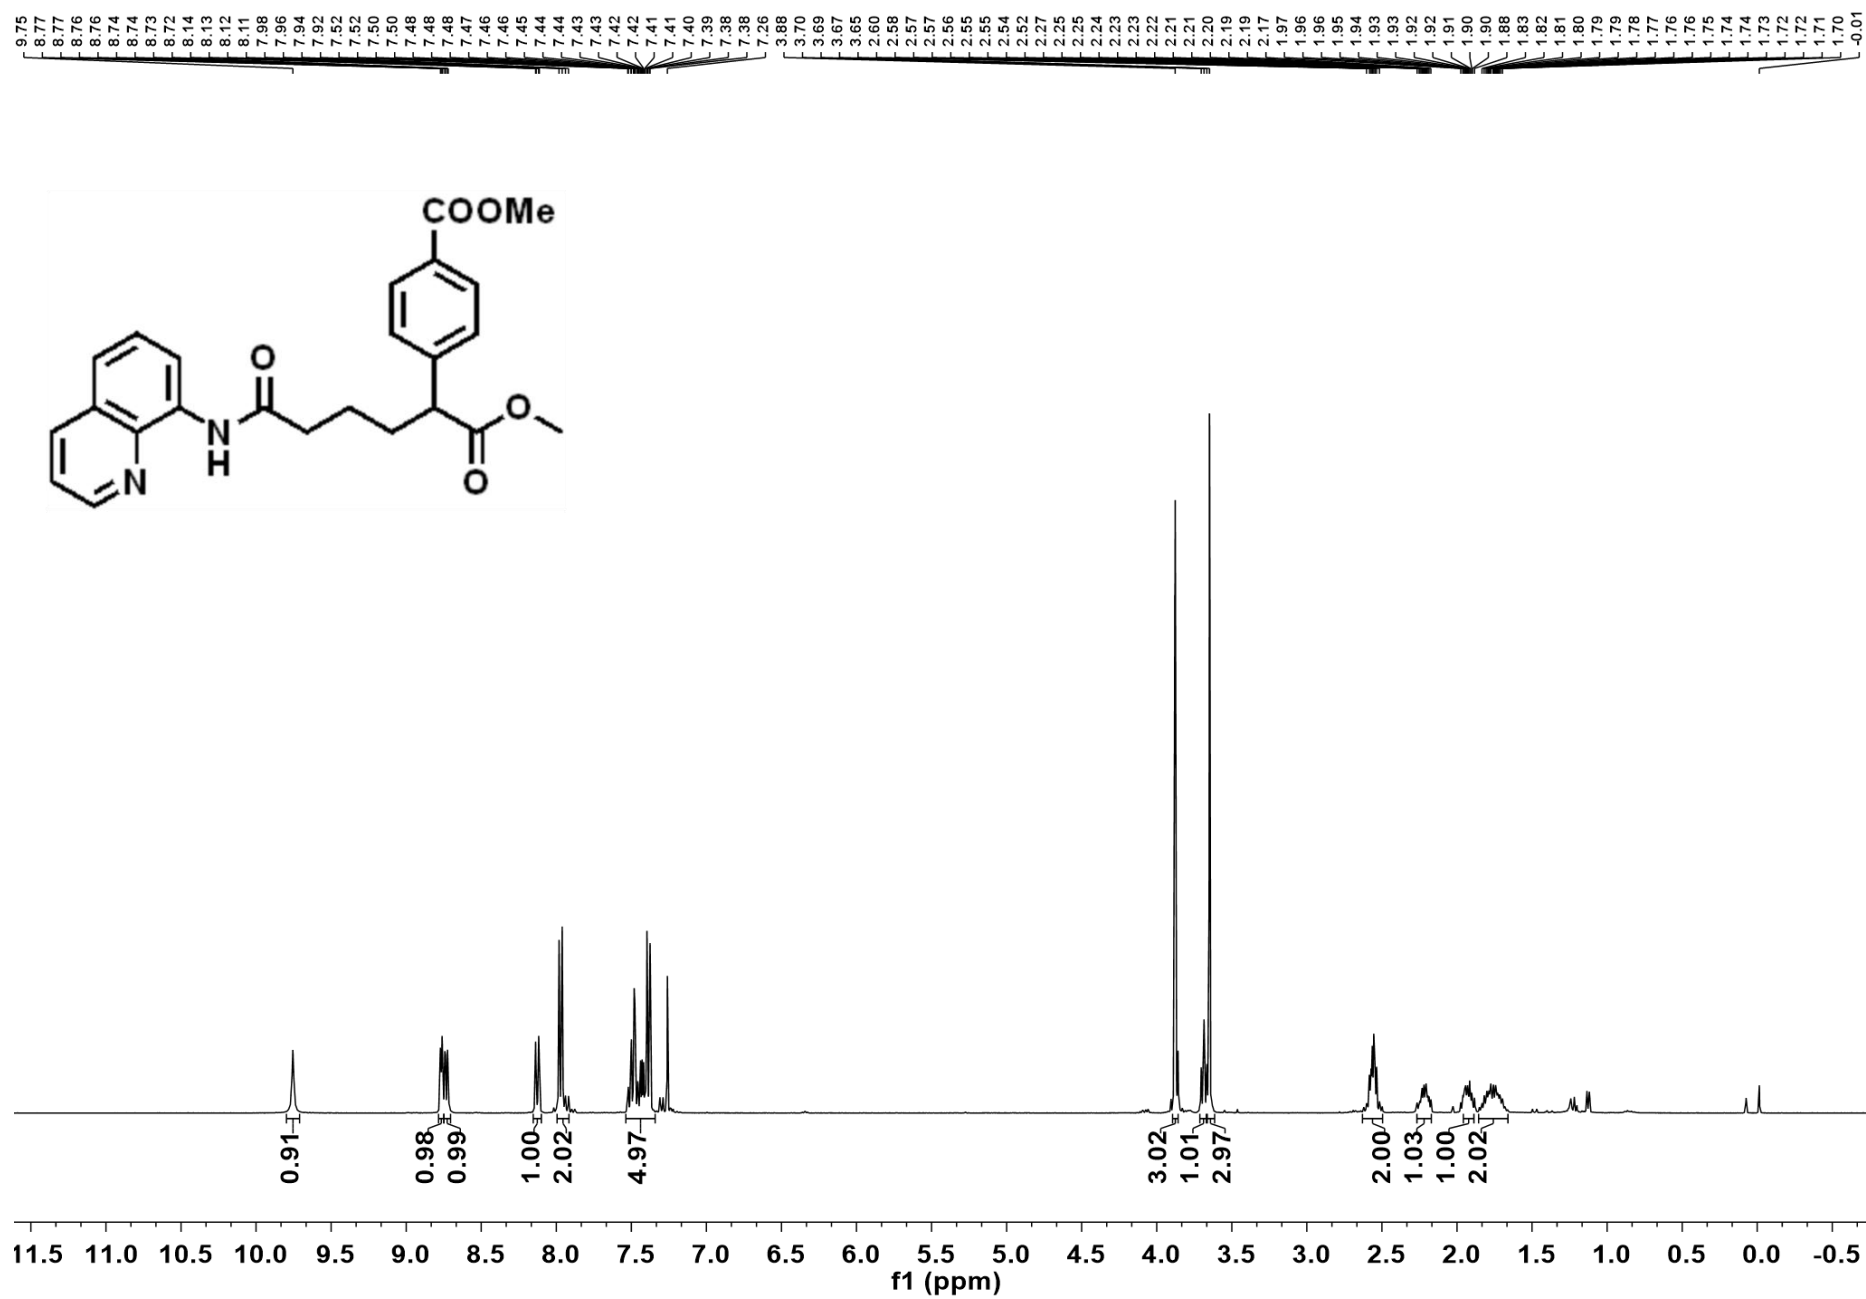

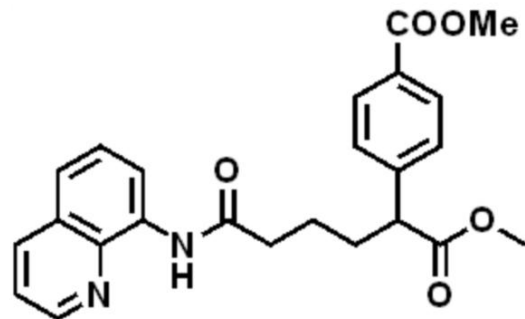

173.69  
171.01  
166.85  
148.20  
143.95  
138.31  
136.44  
134.43  
130.07  
129.31  
128.11  
127.97  
127.44  
121.68  
121.56  
116.48

77.48  
77.16  
76.84

52.28  
52.17  
51.54

37.63  
32.90

23.59

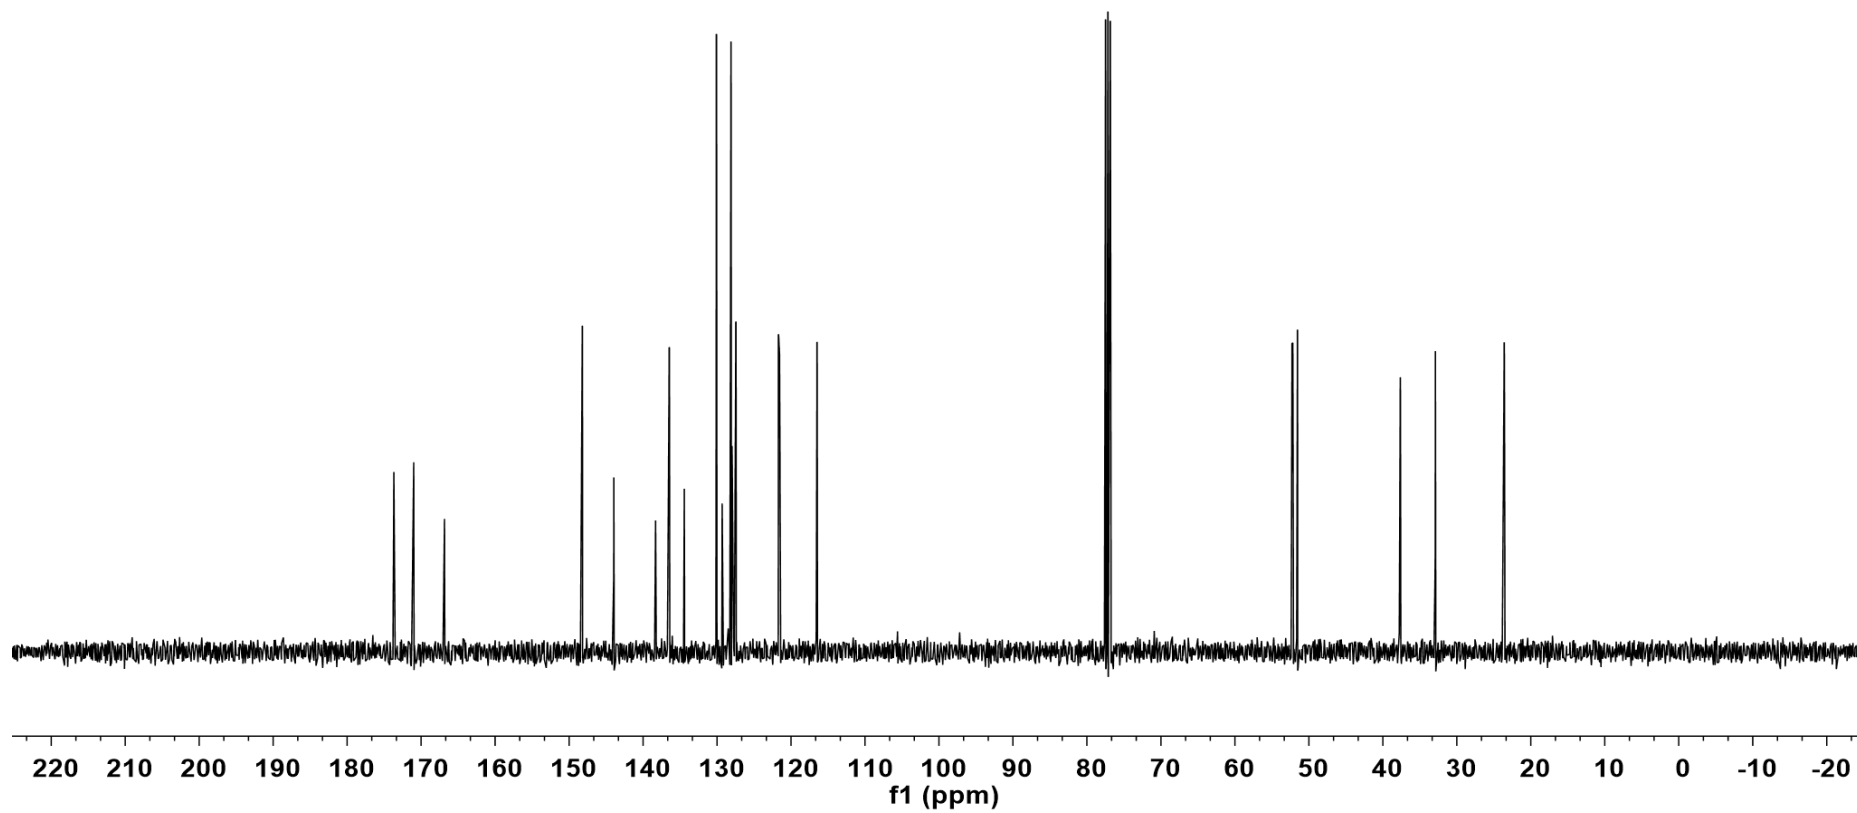

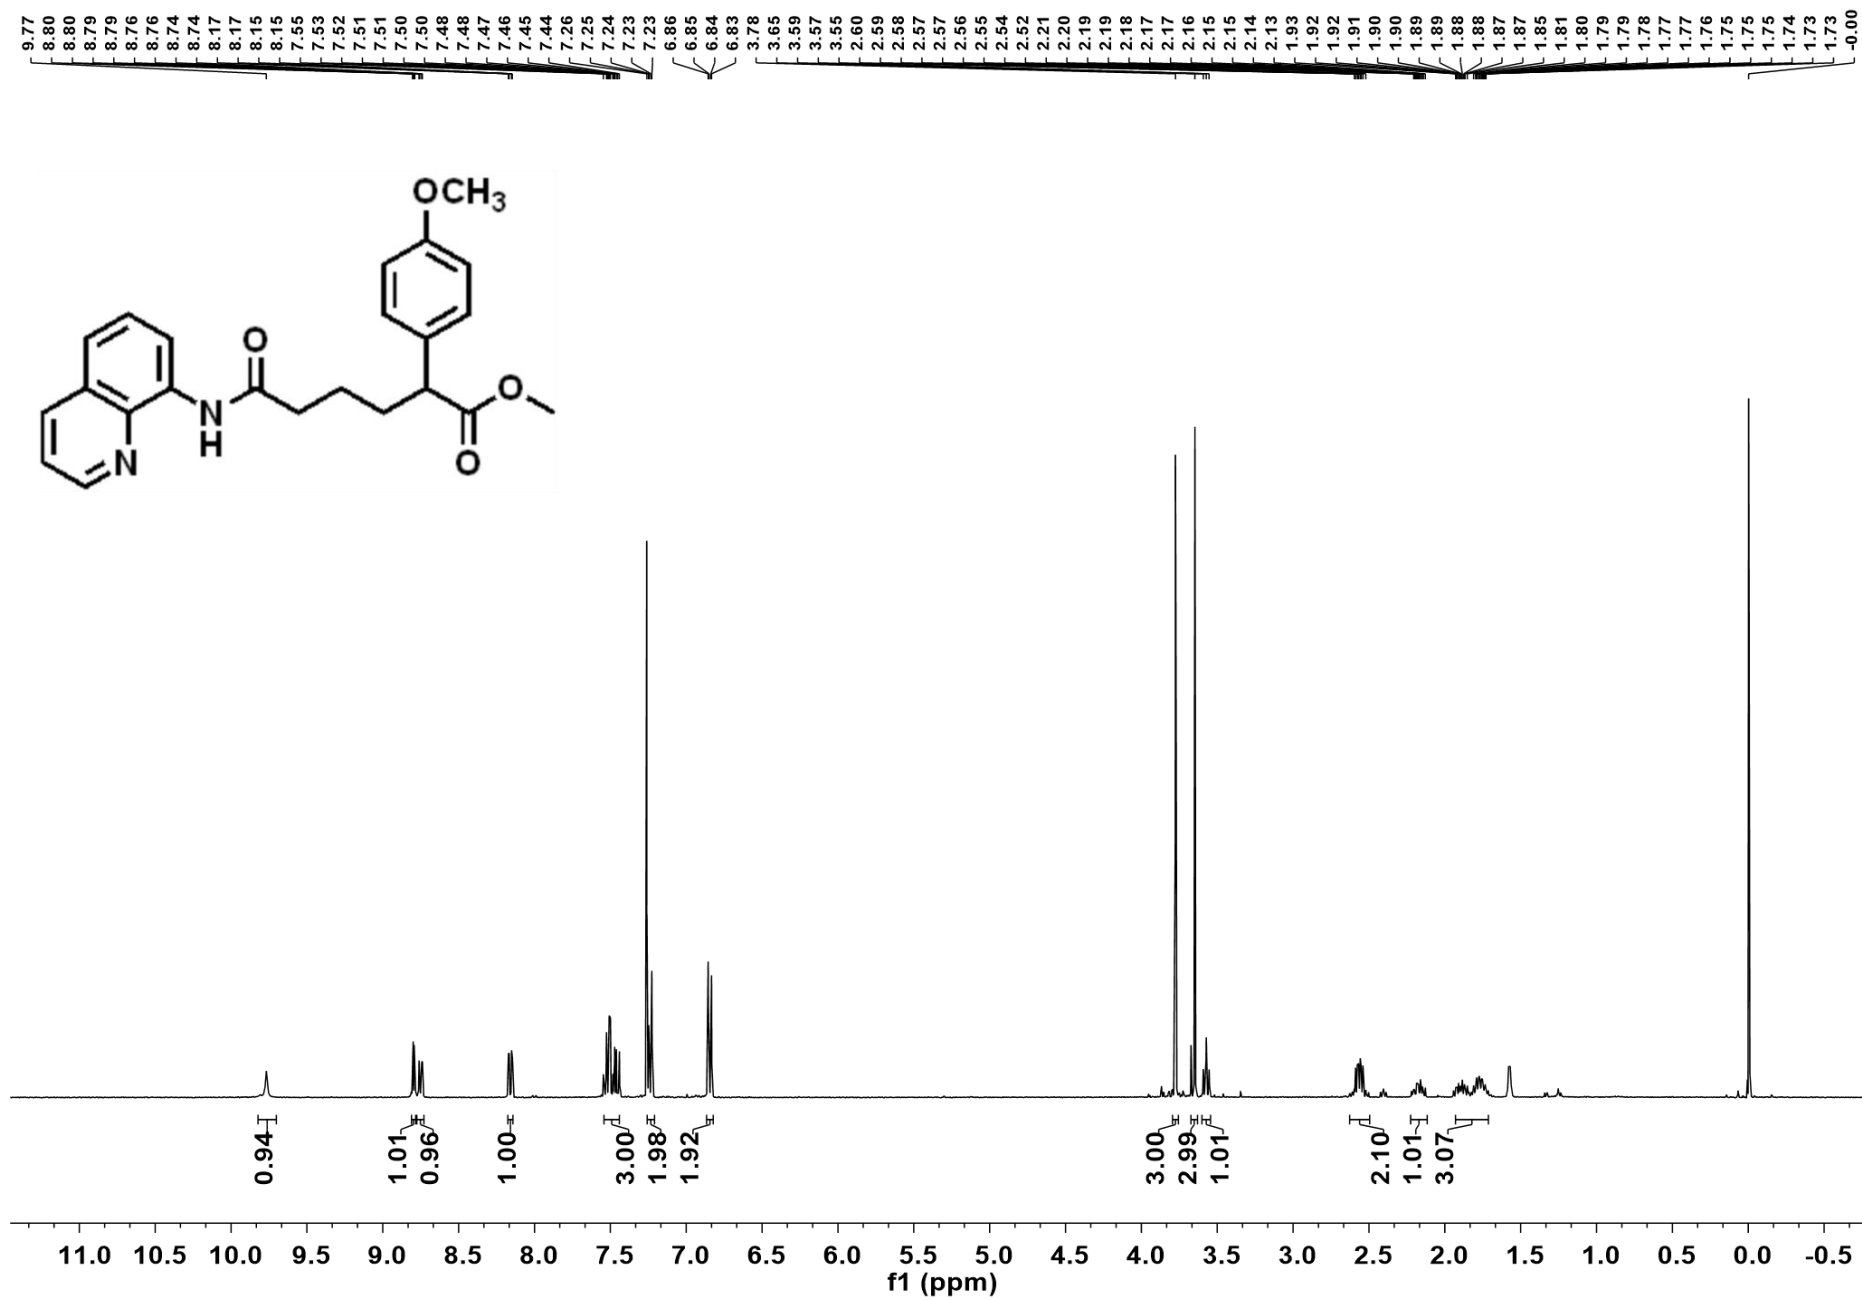



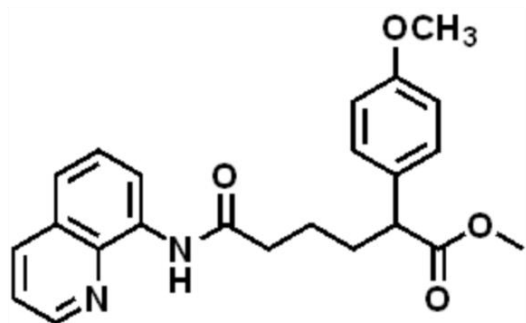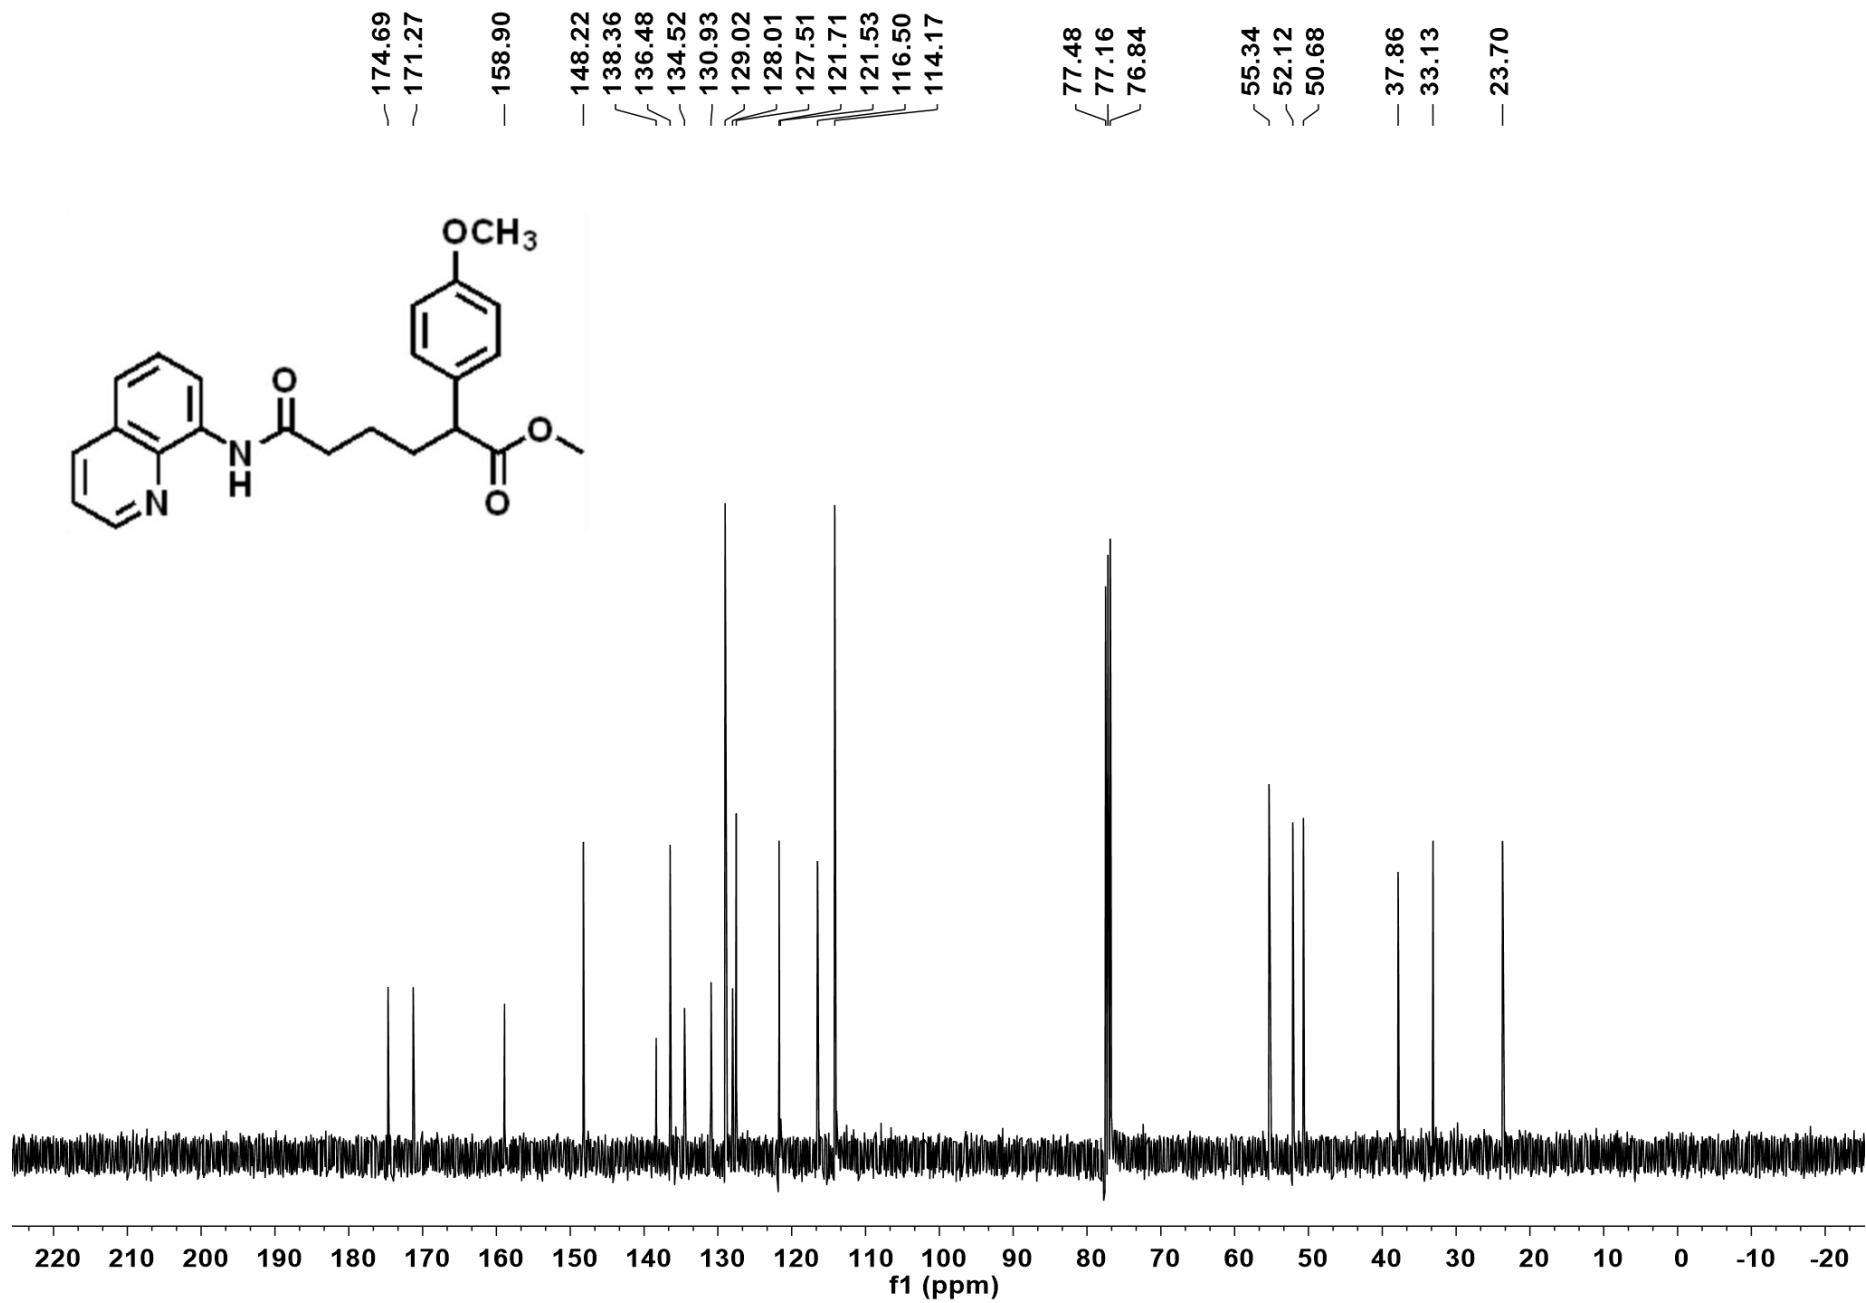

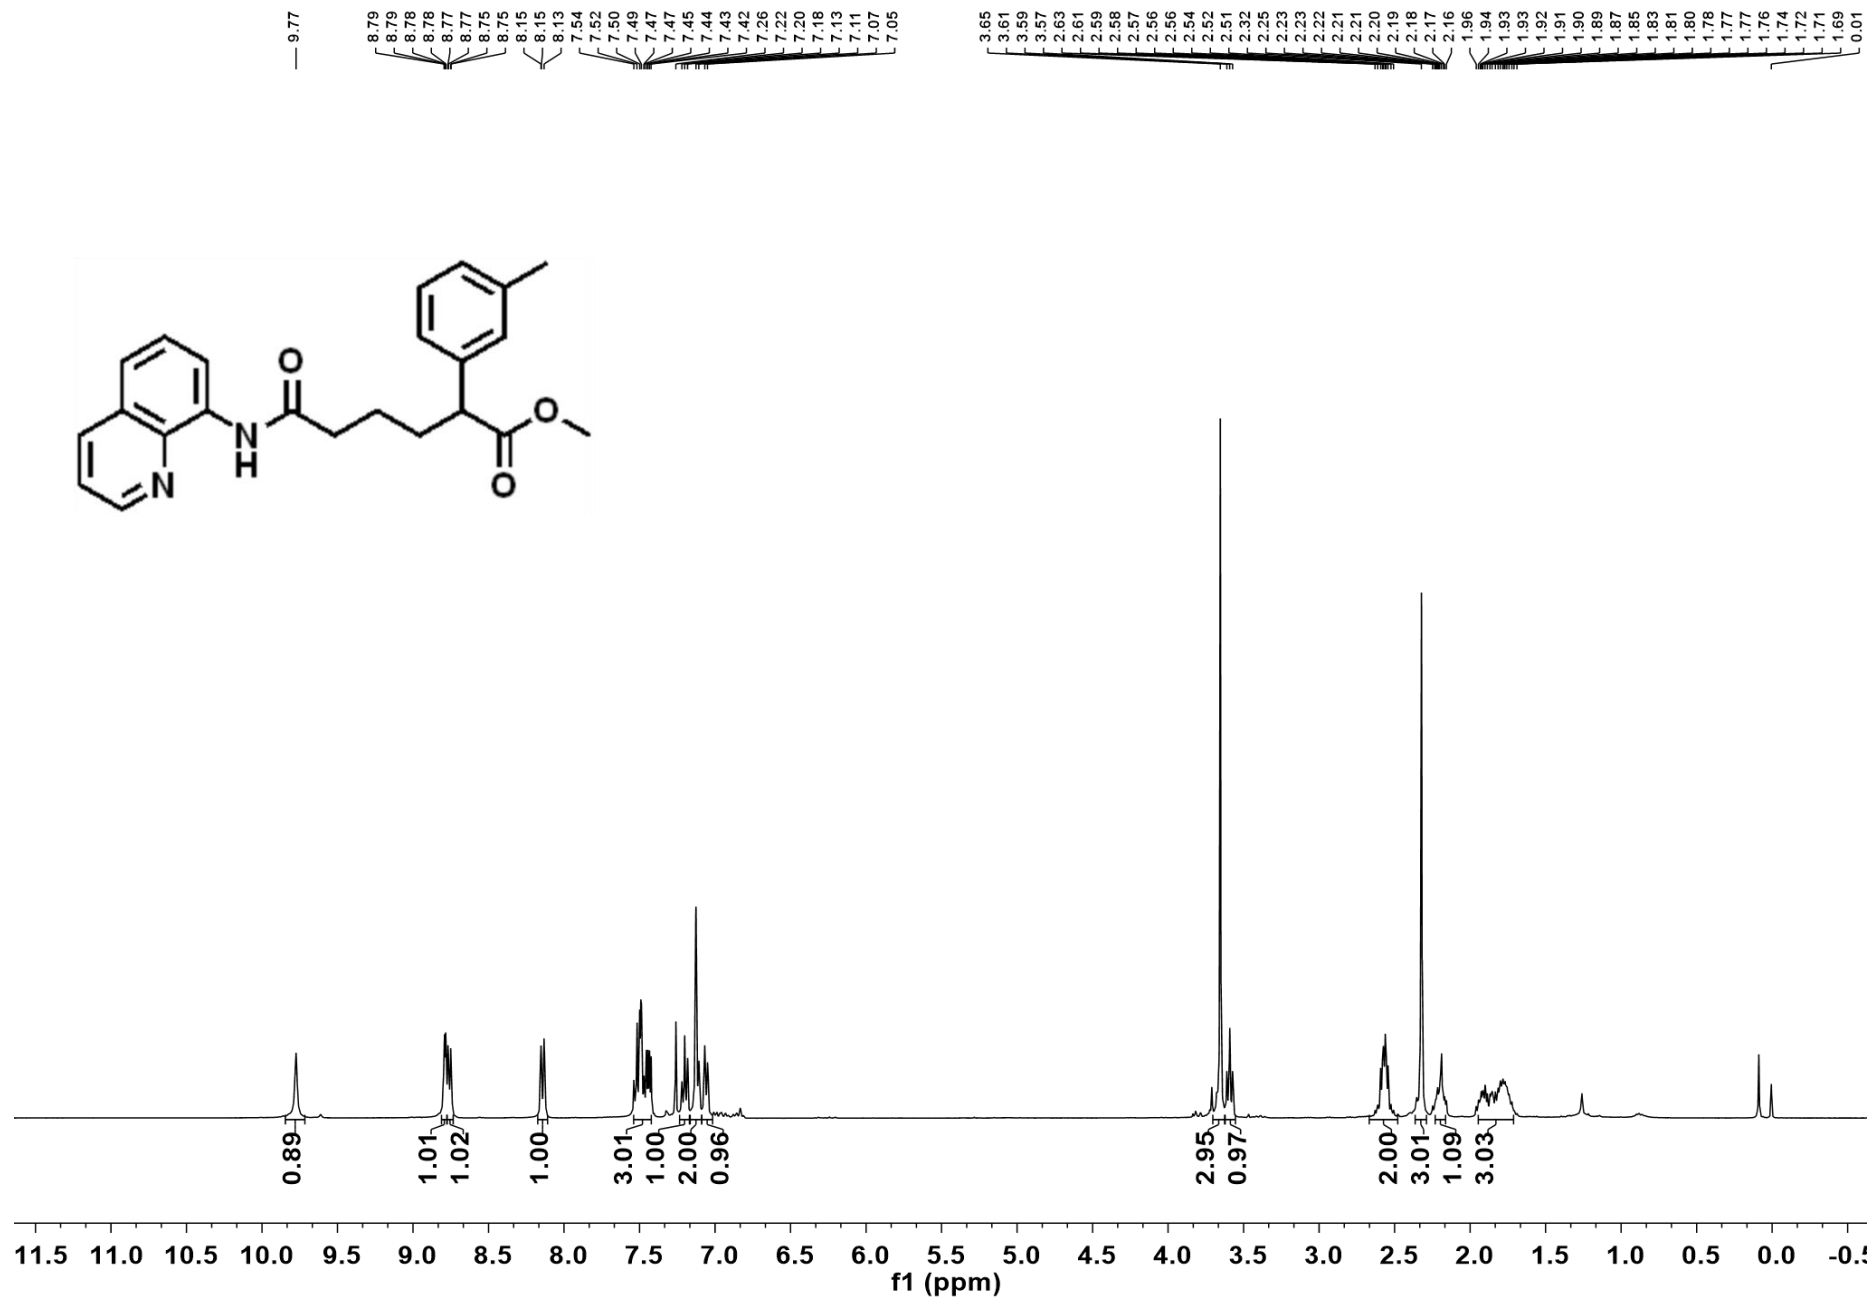

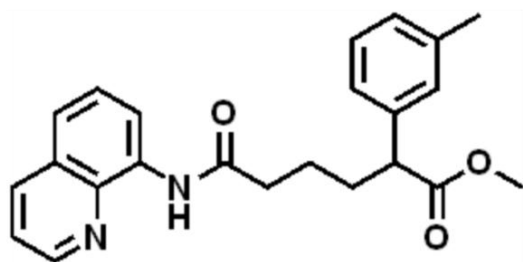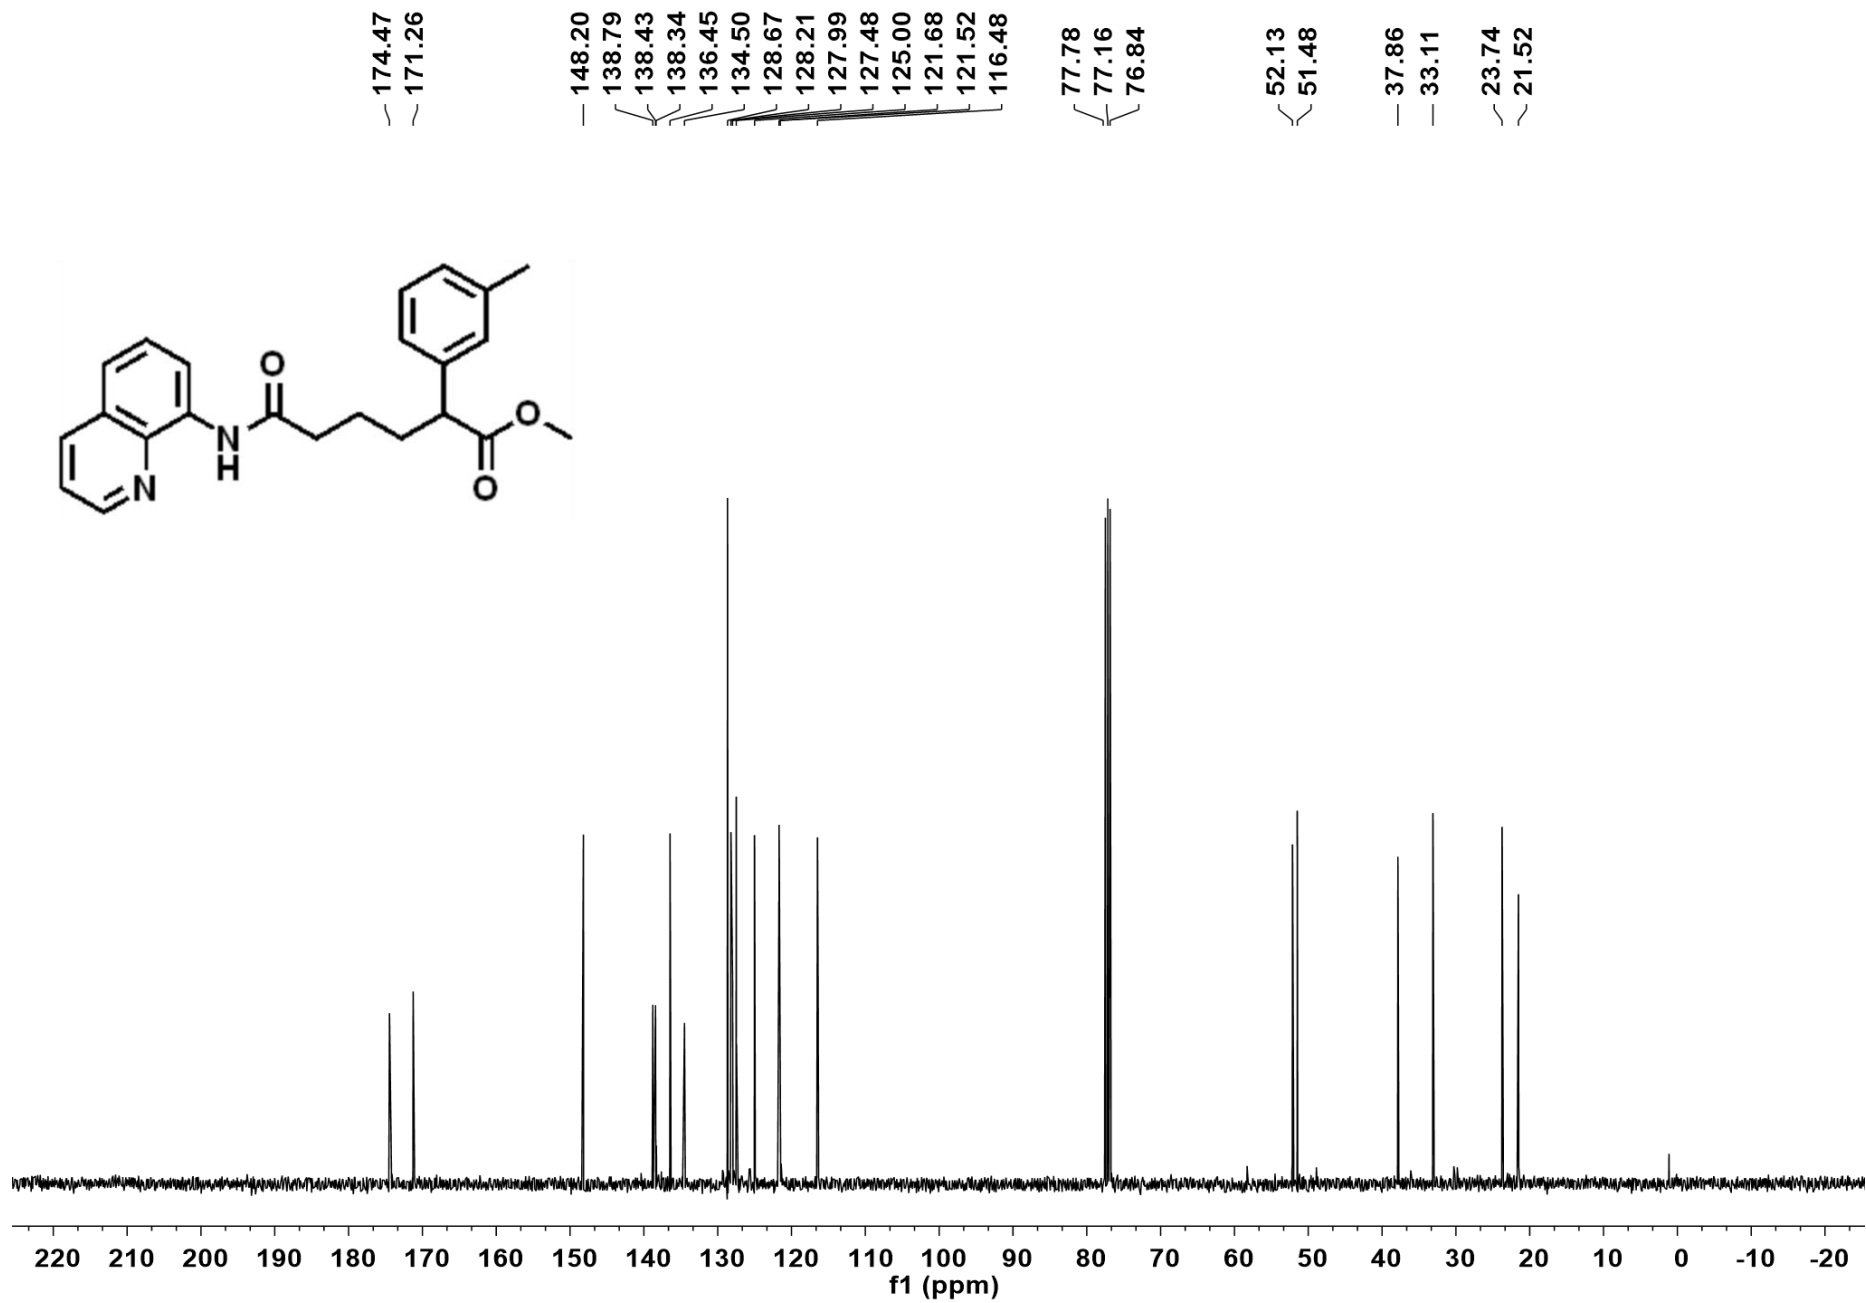

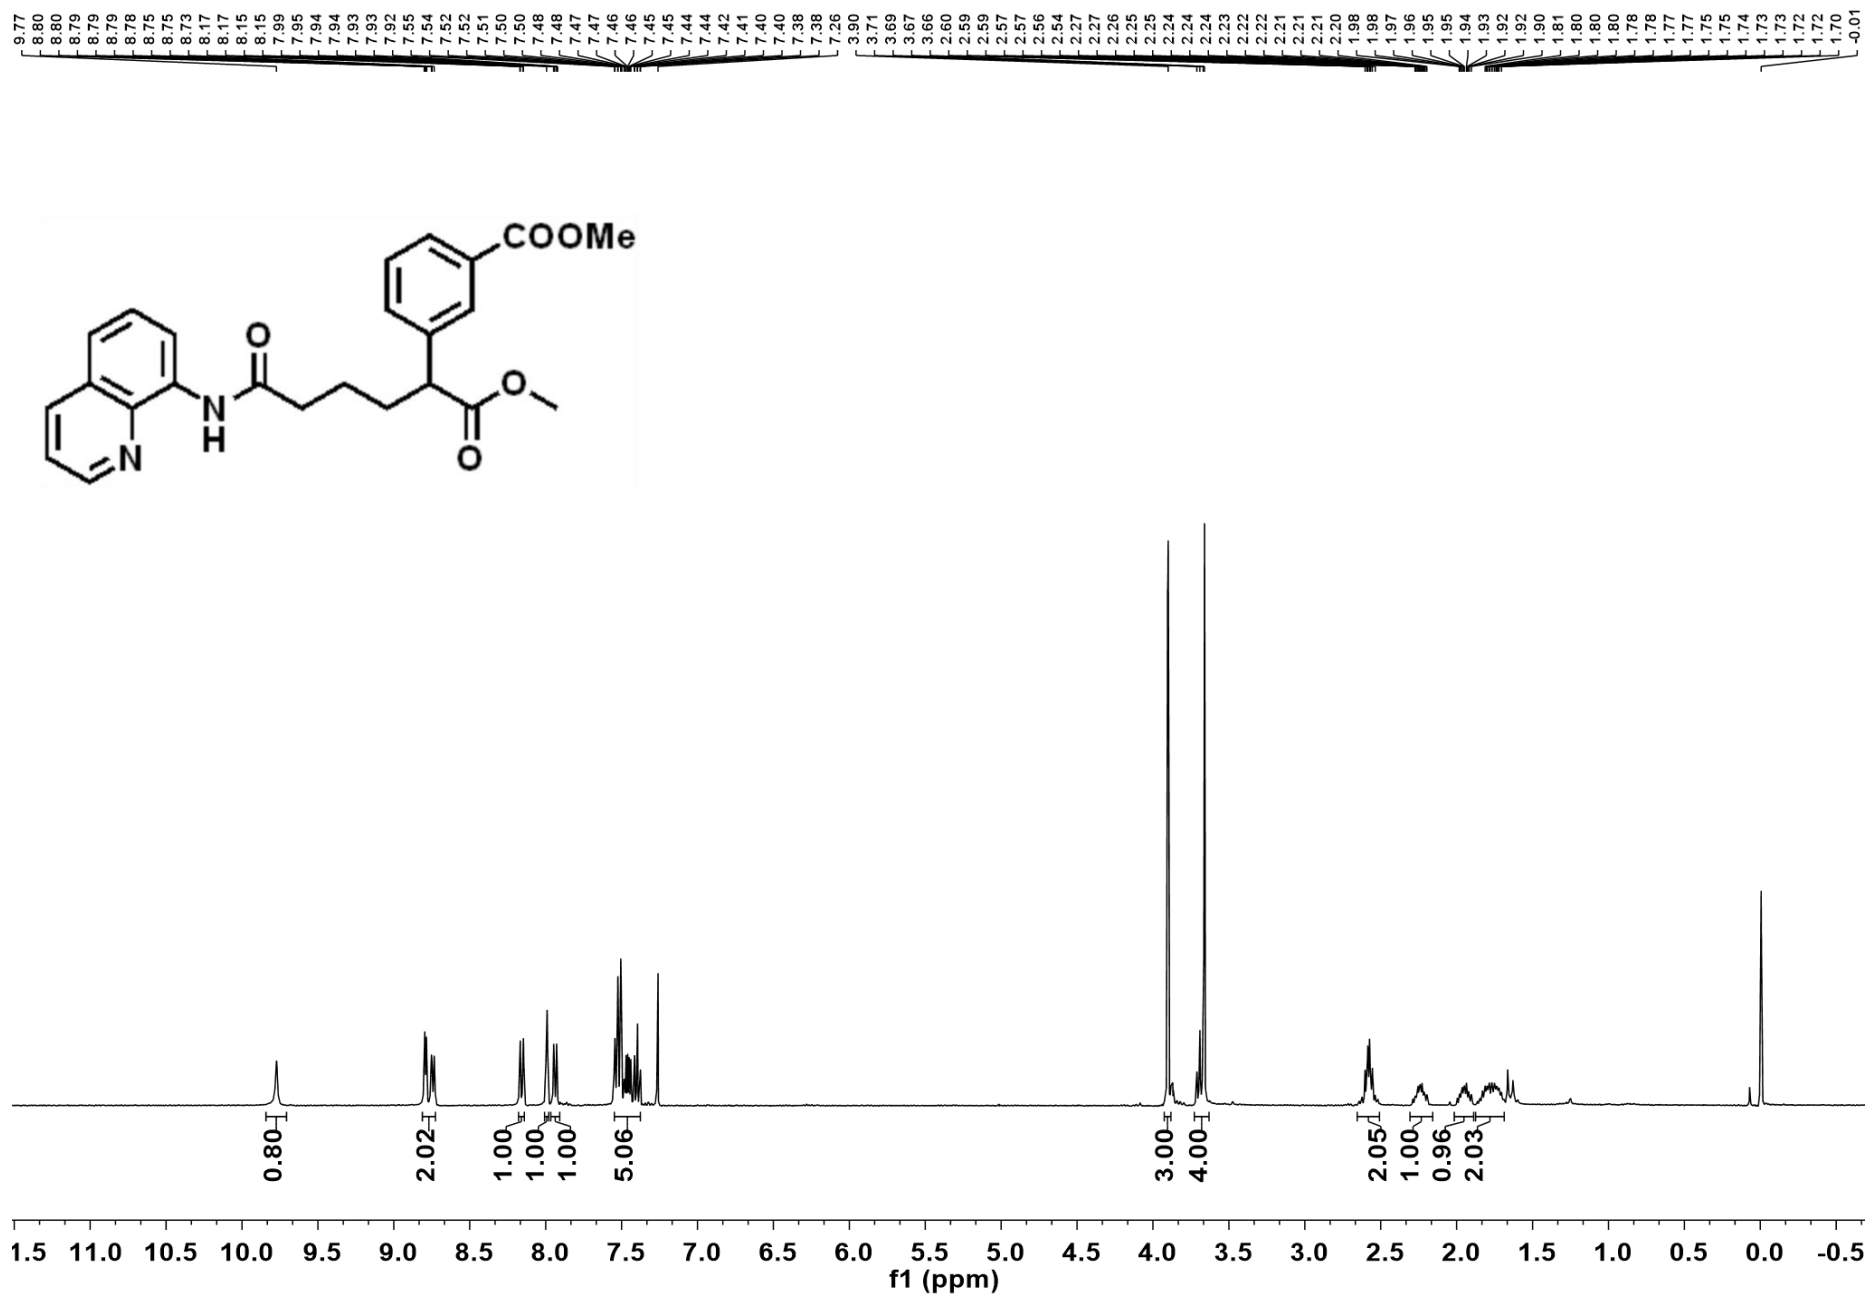

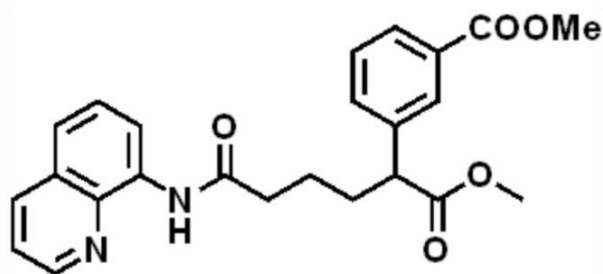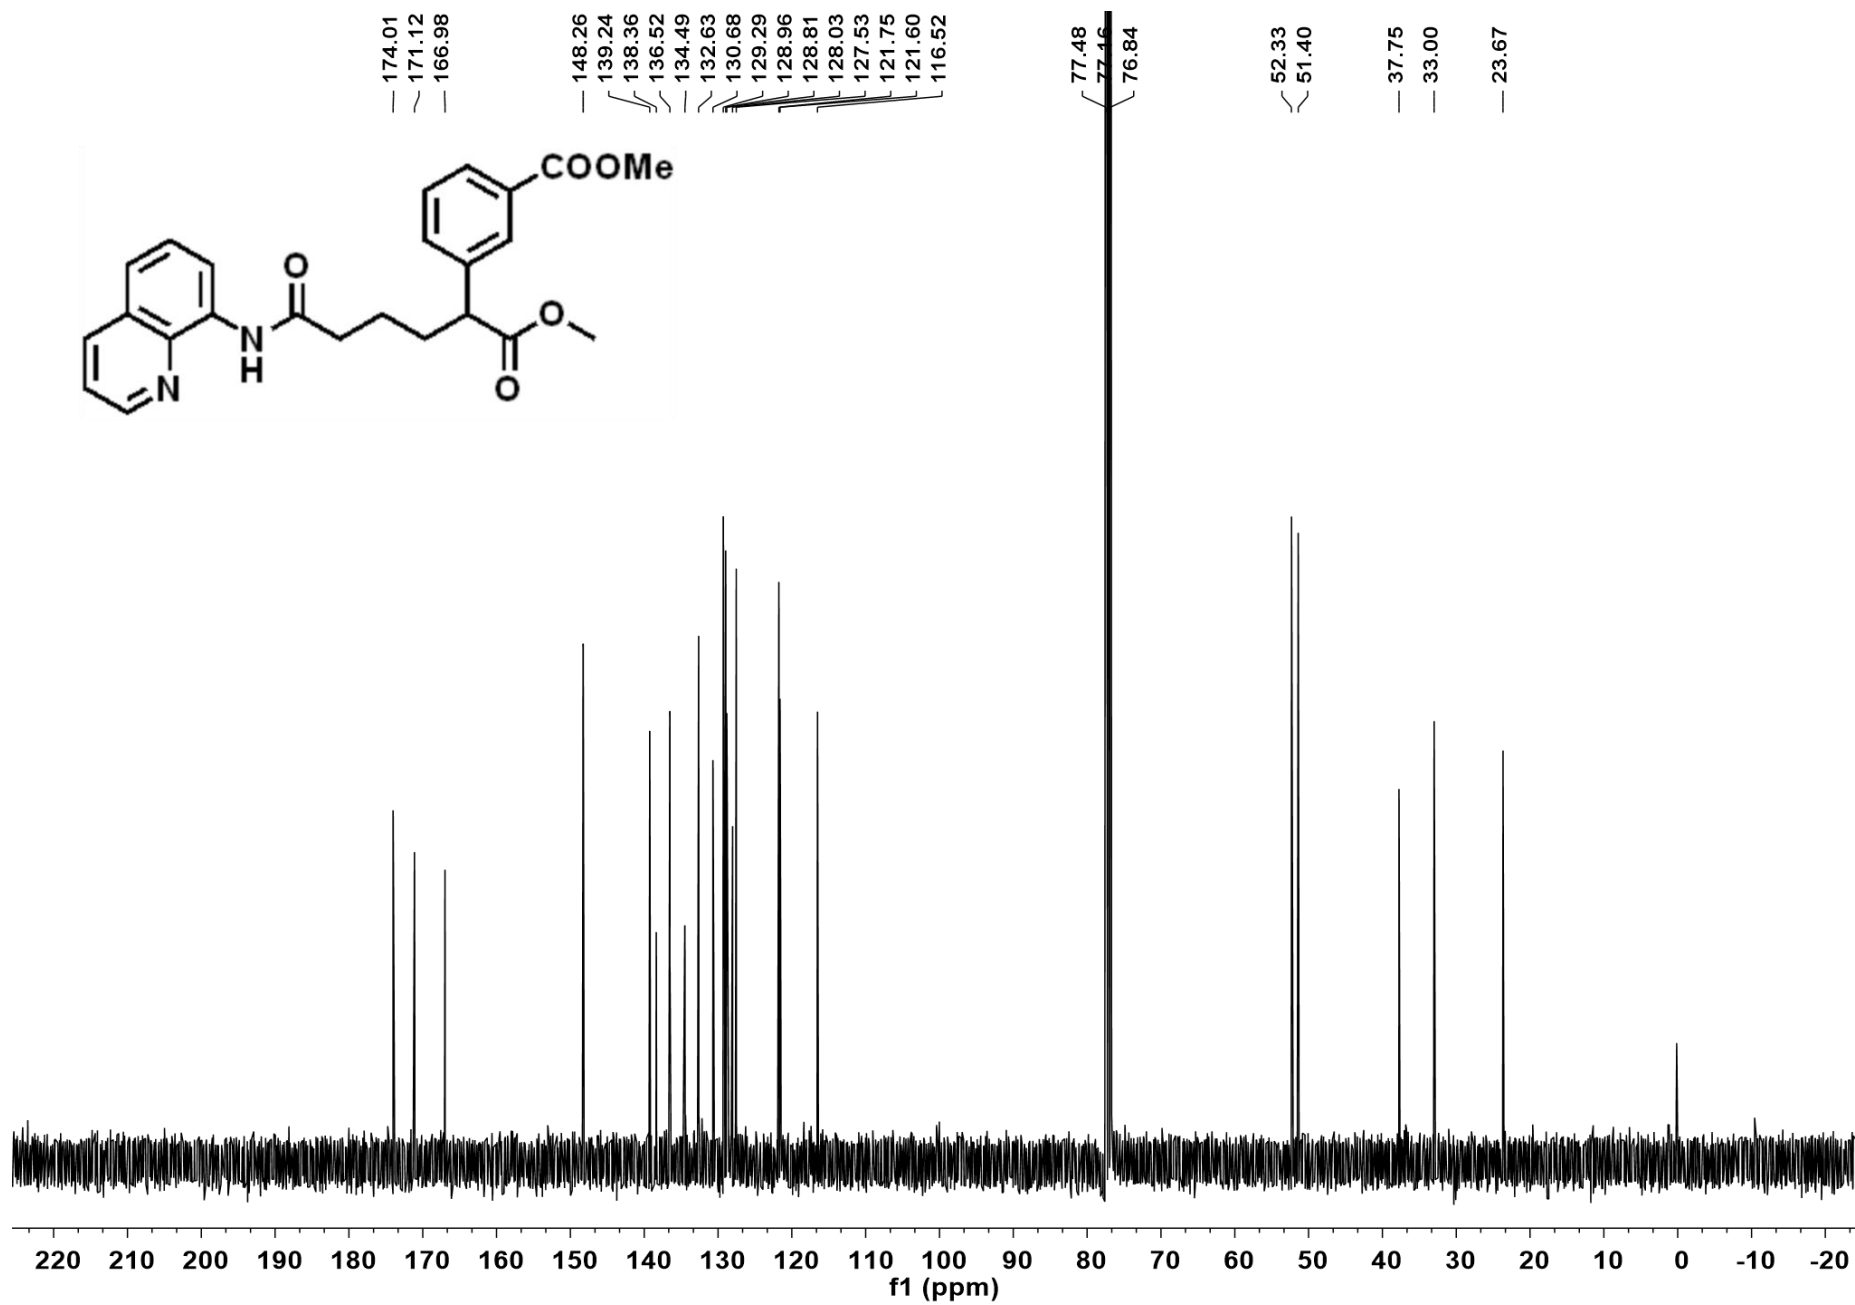

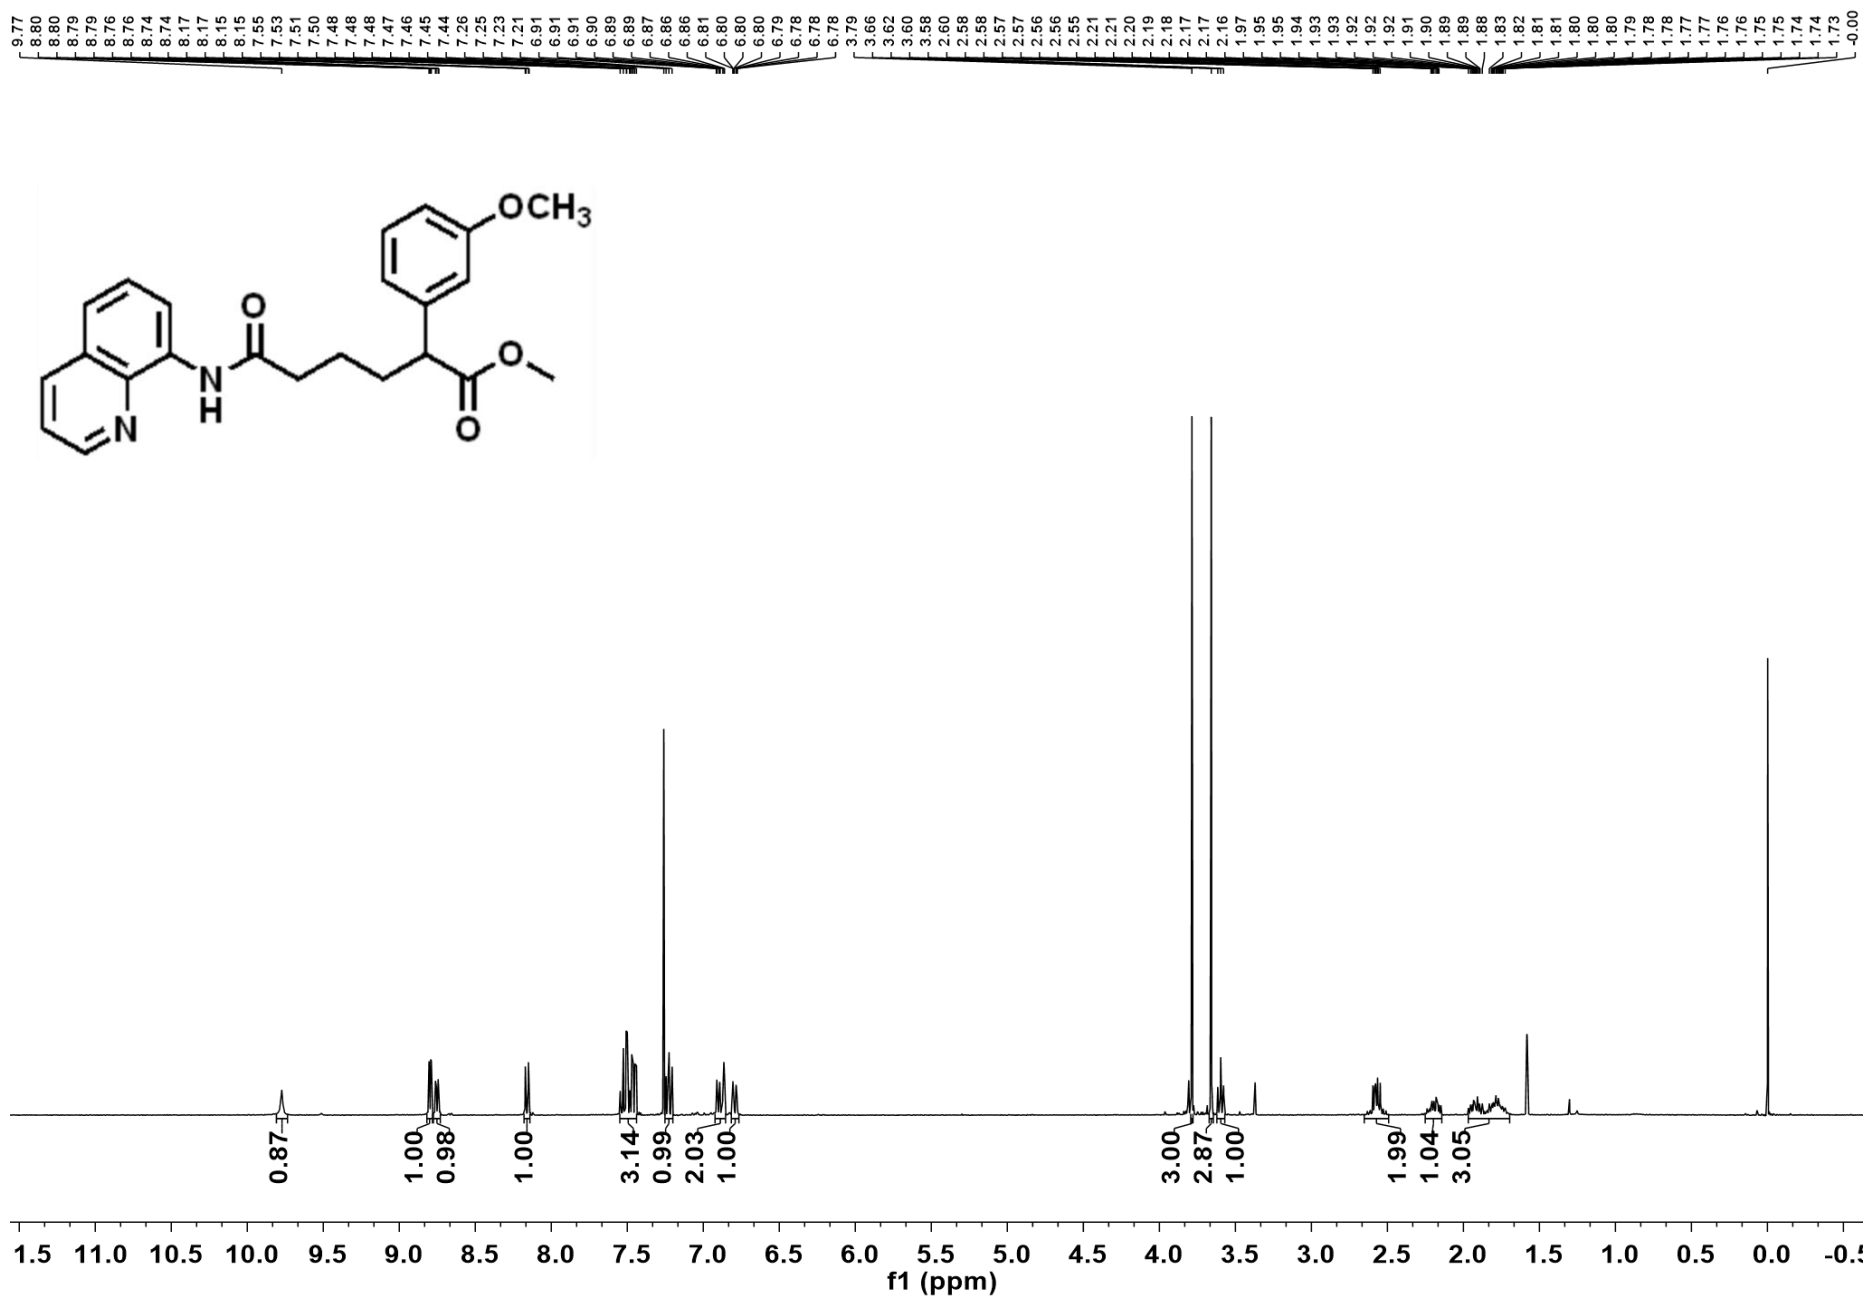

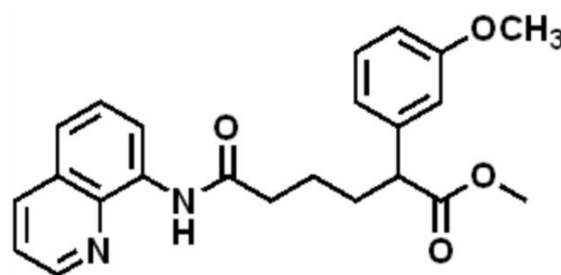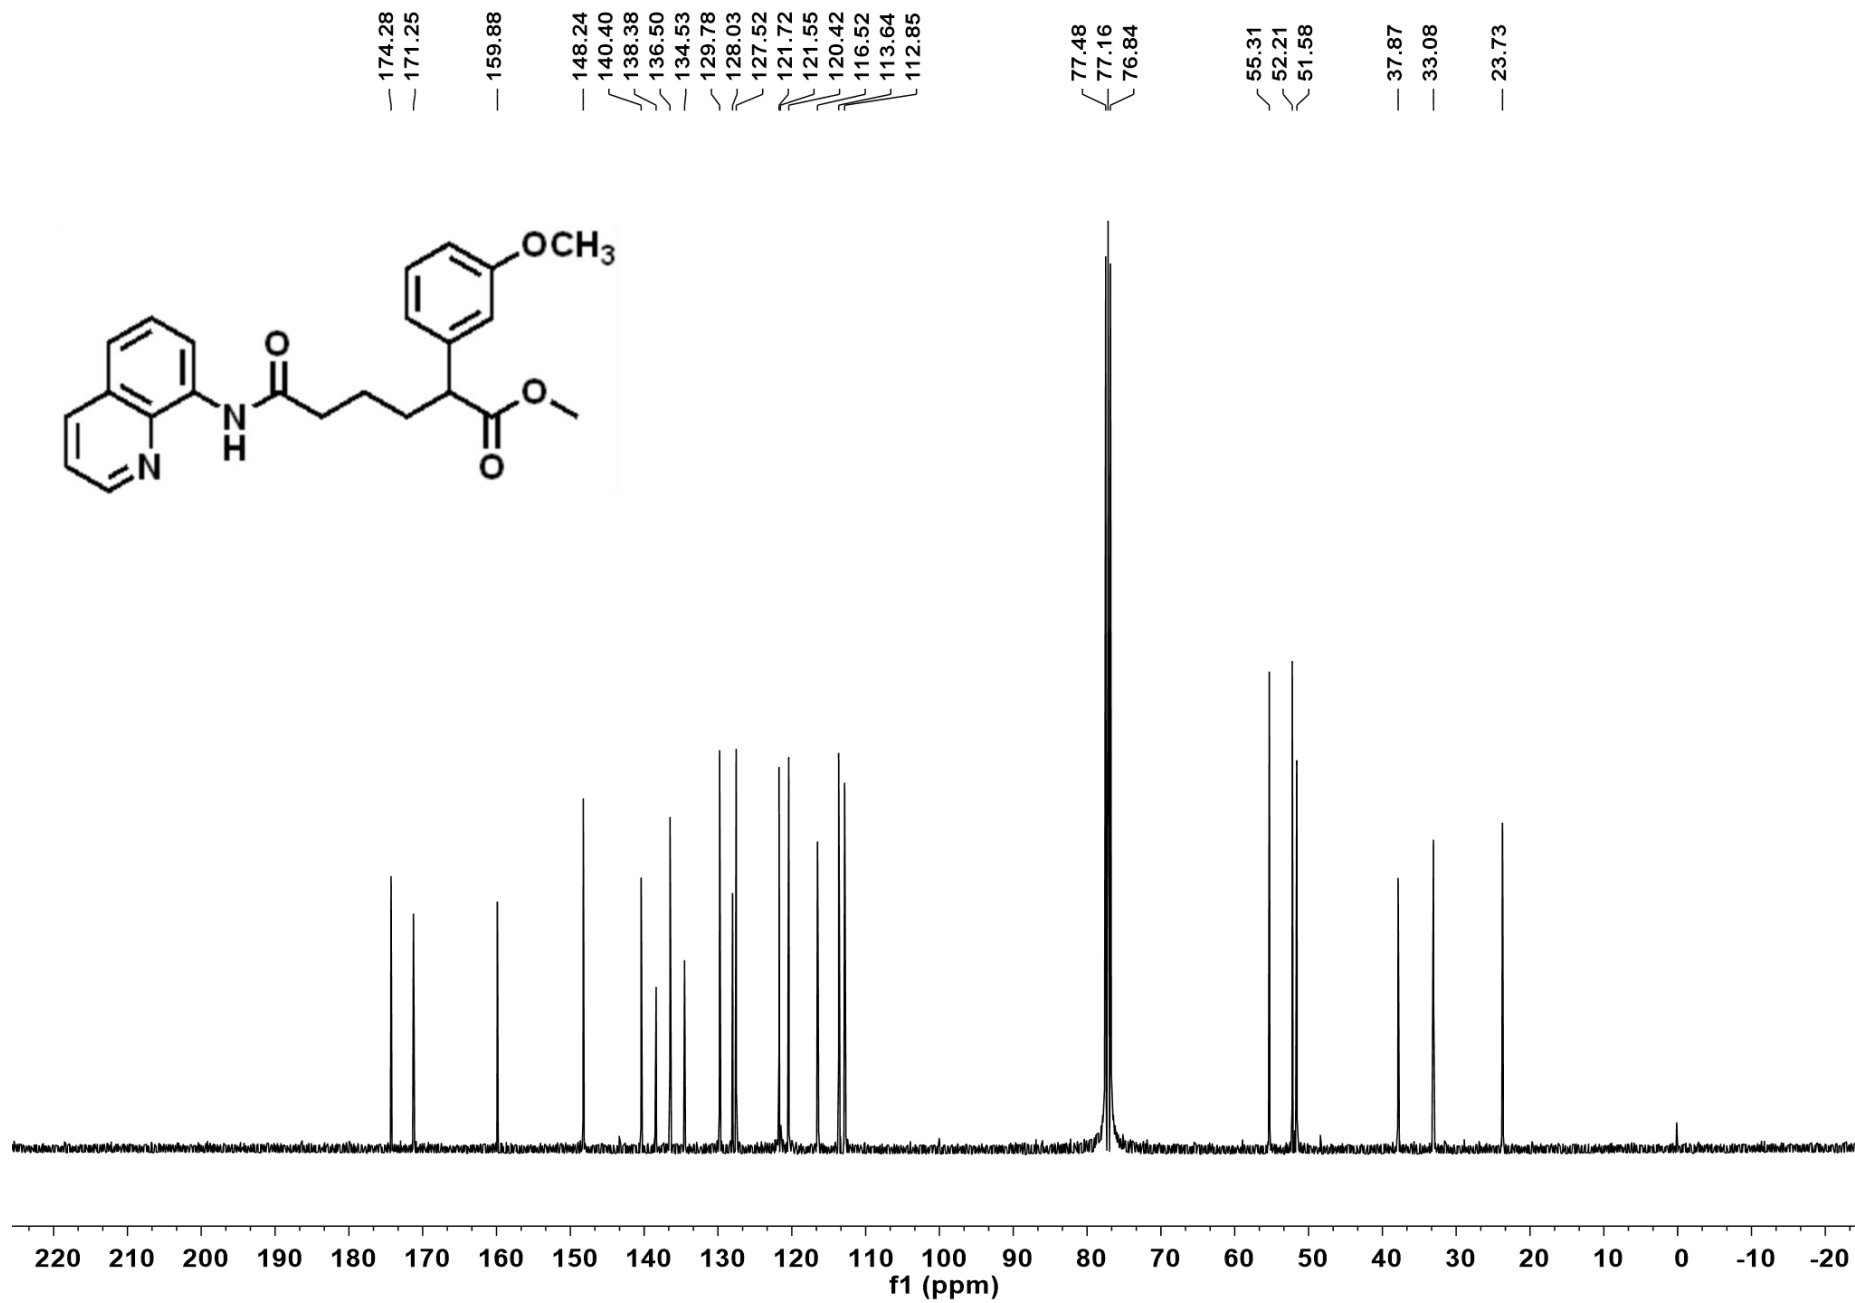

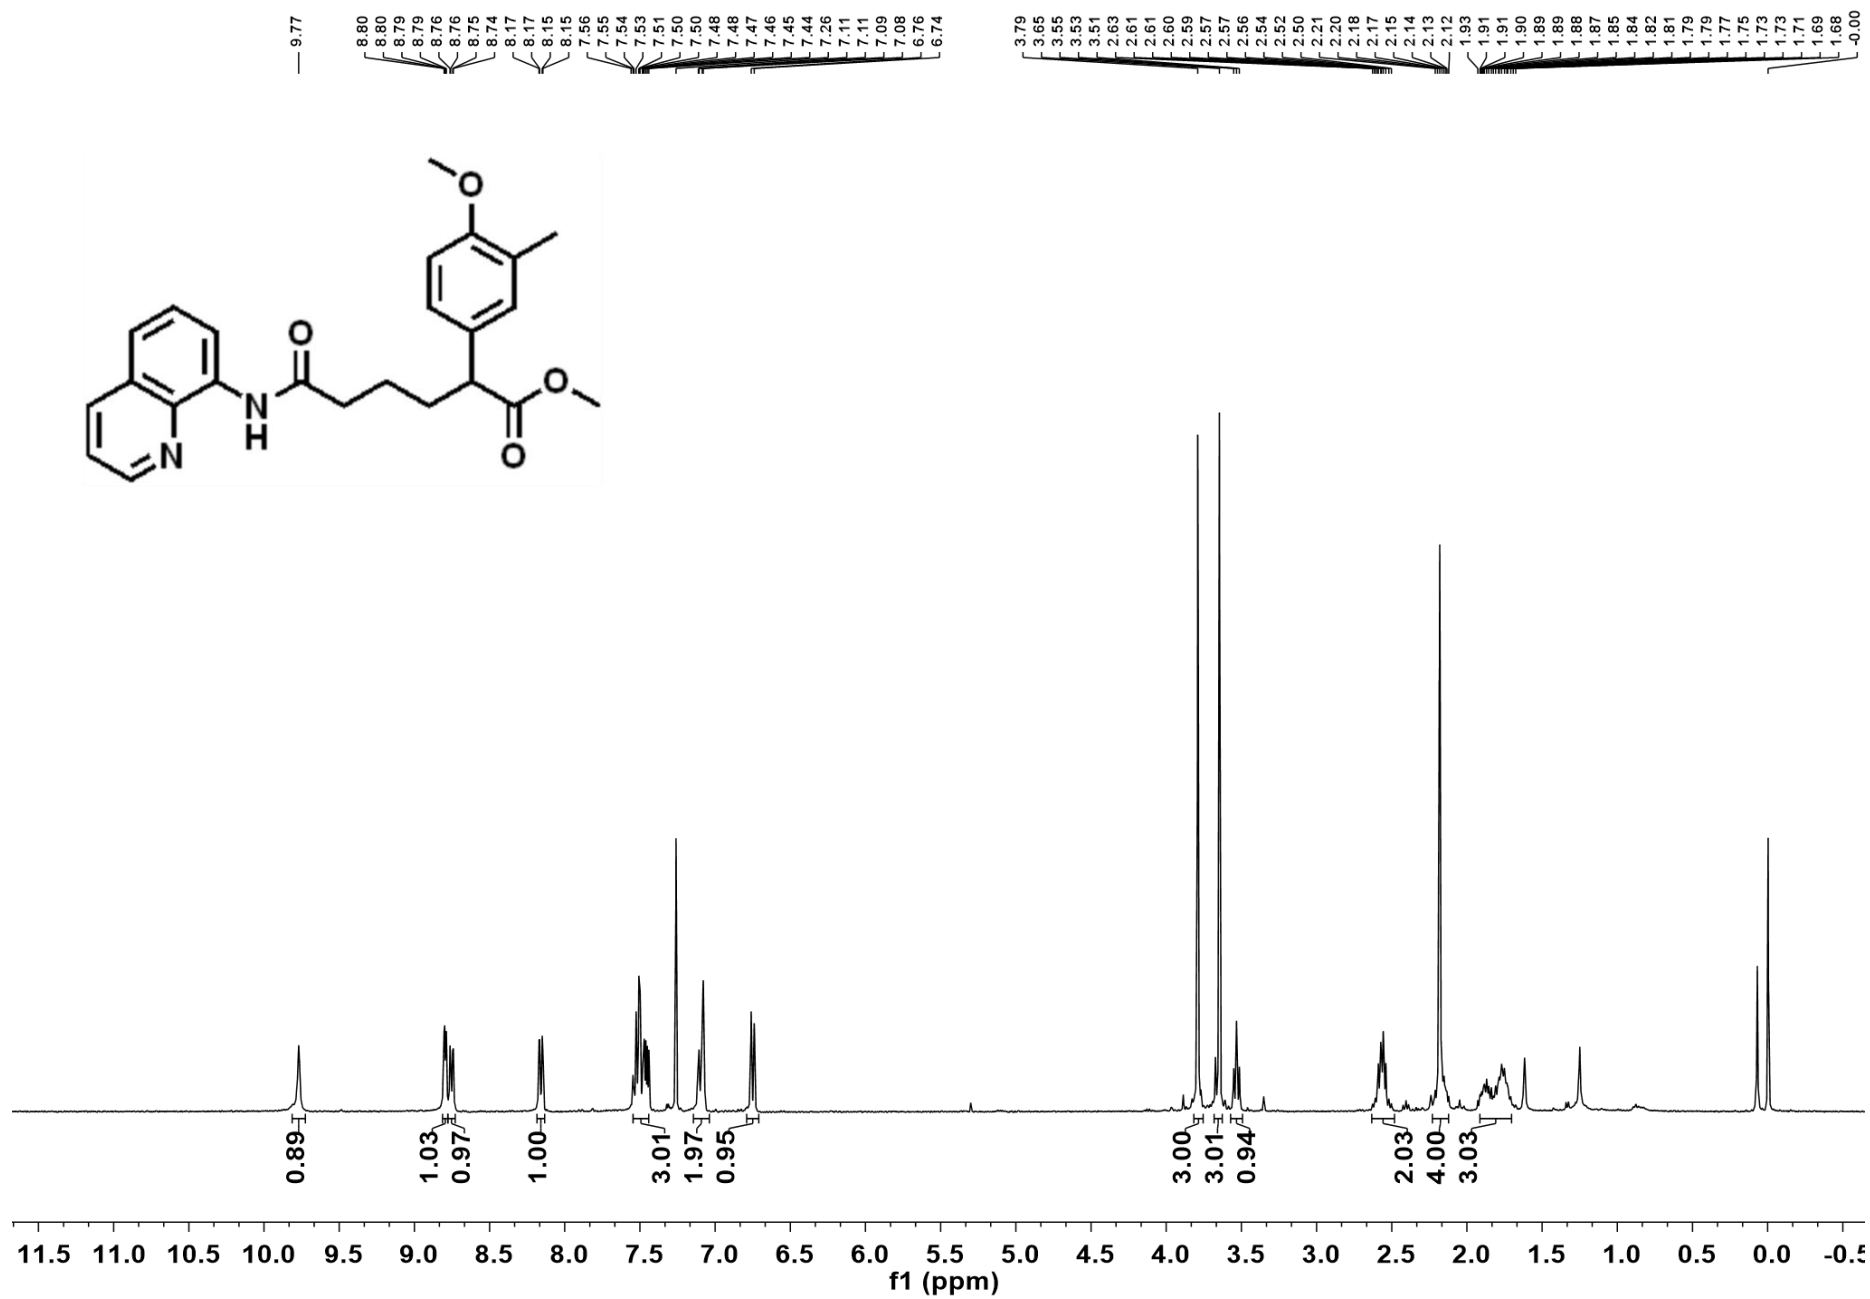



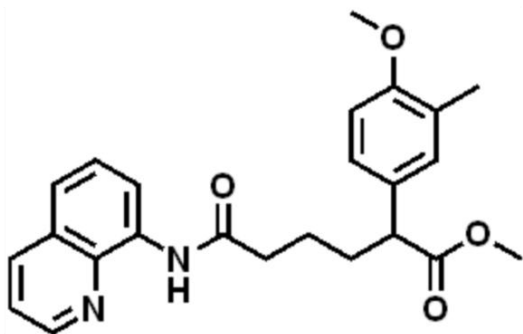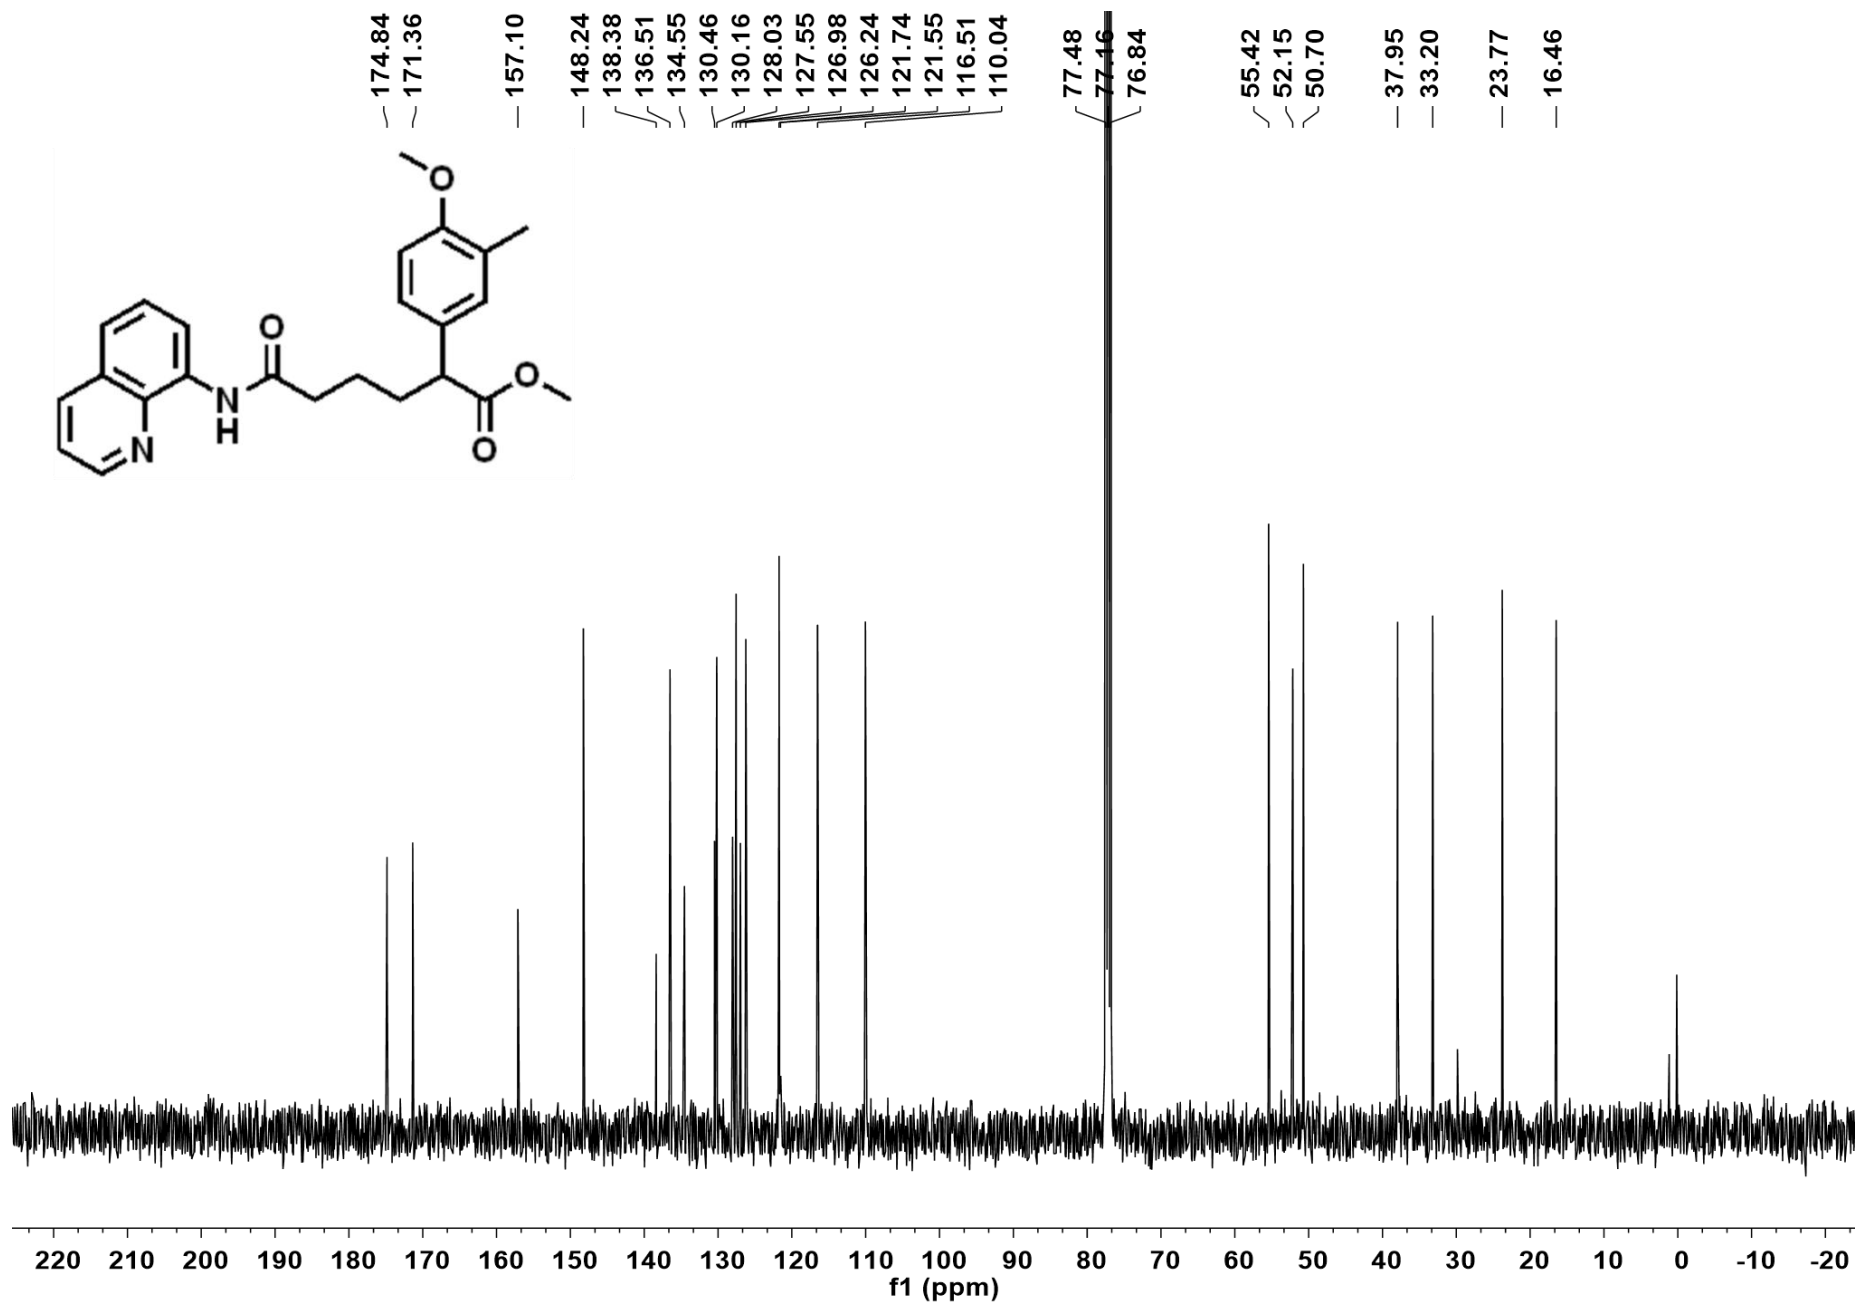

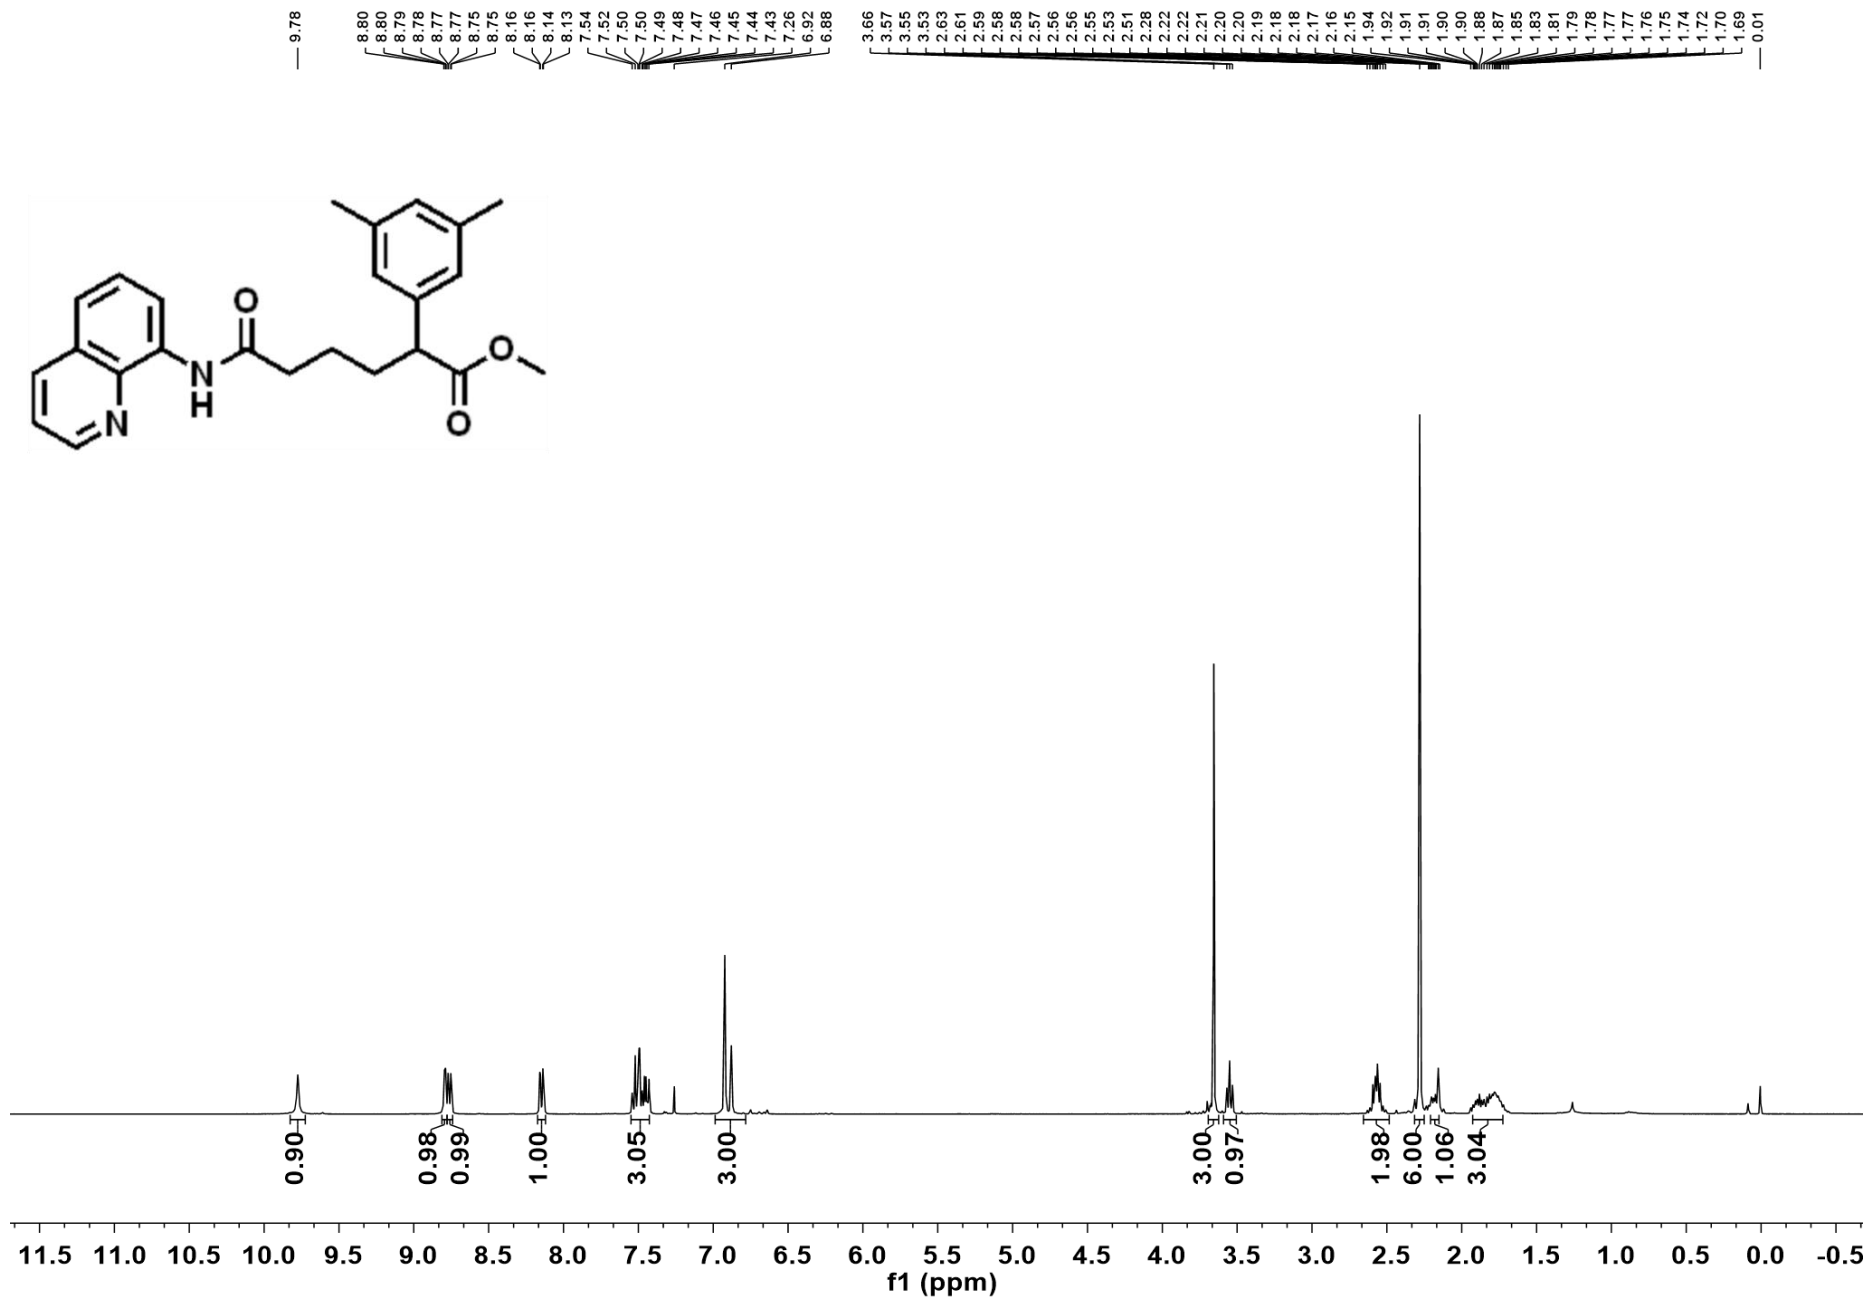

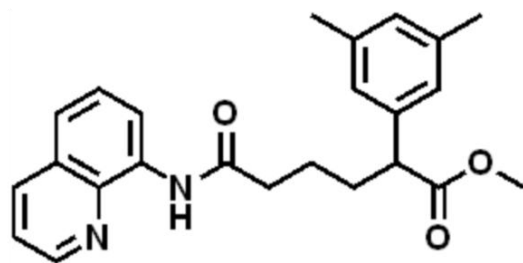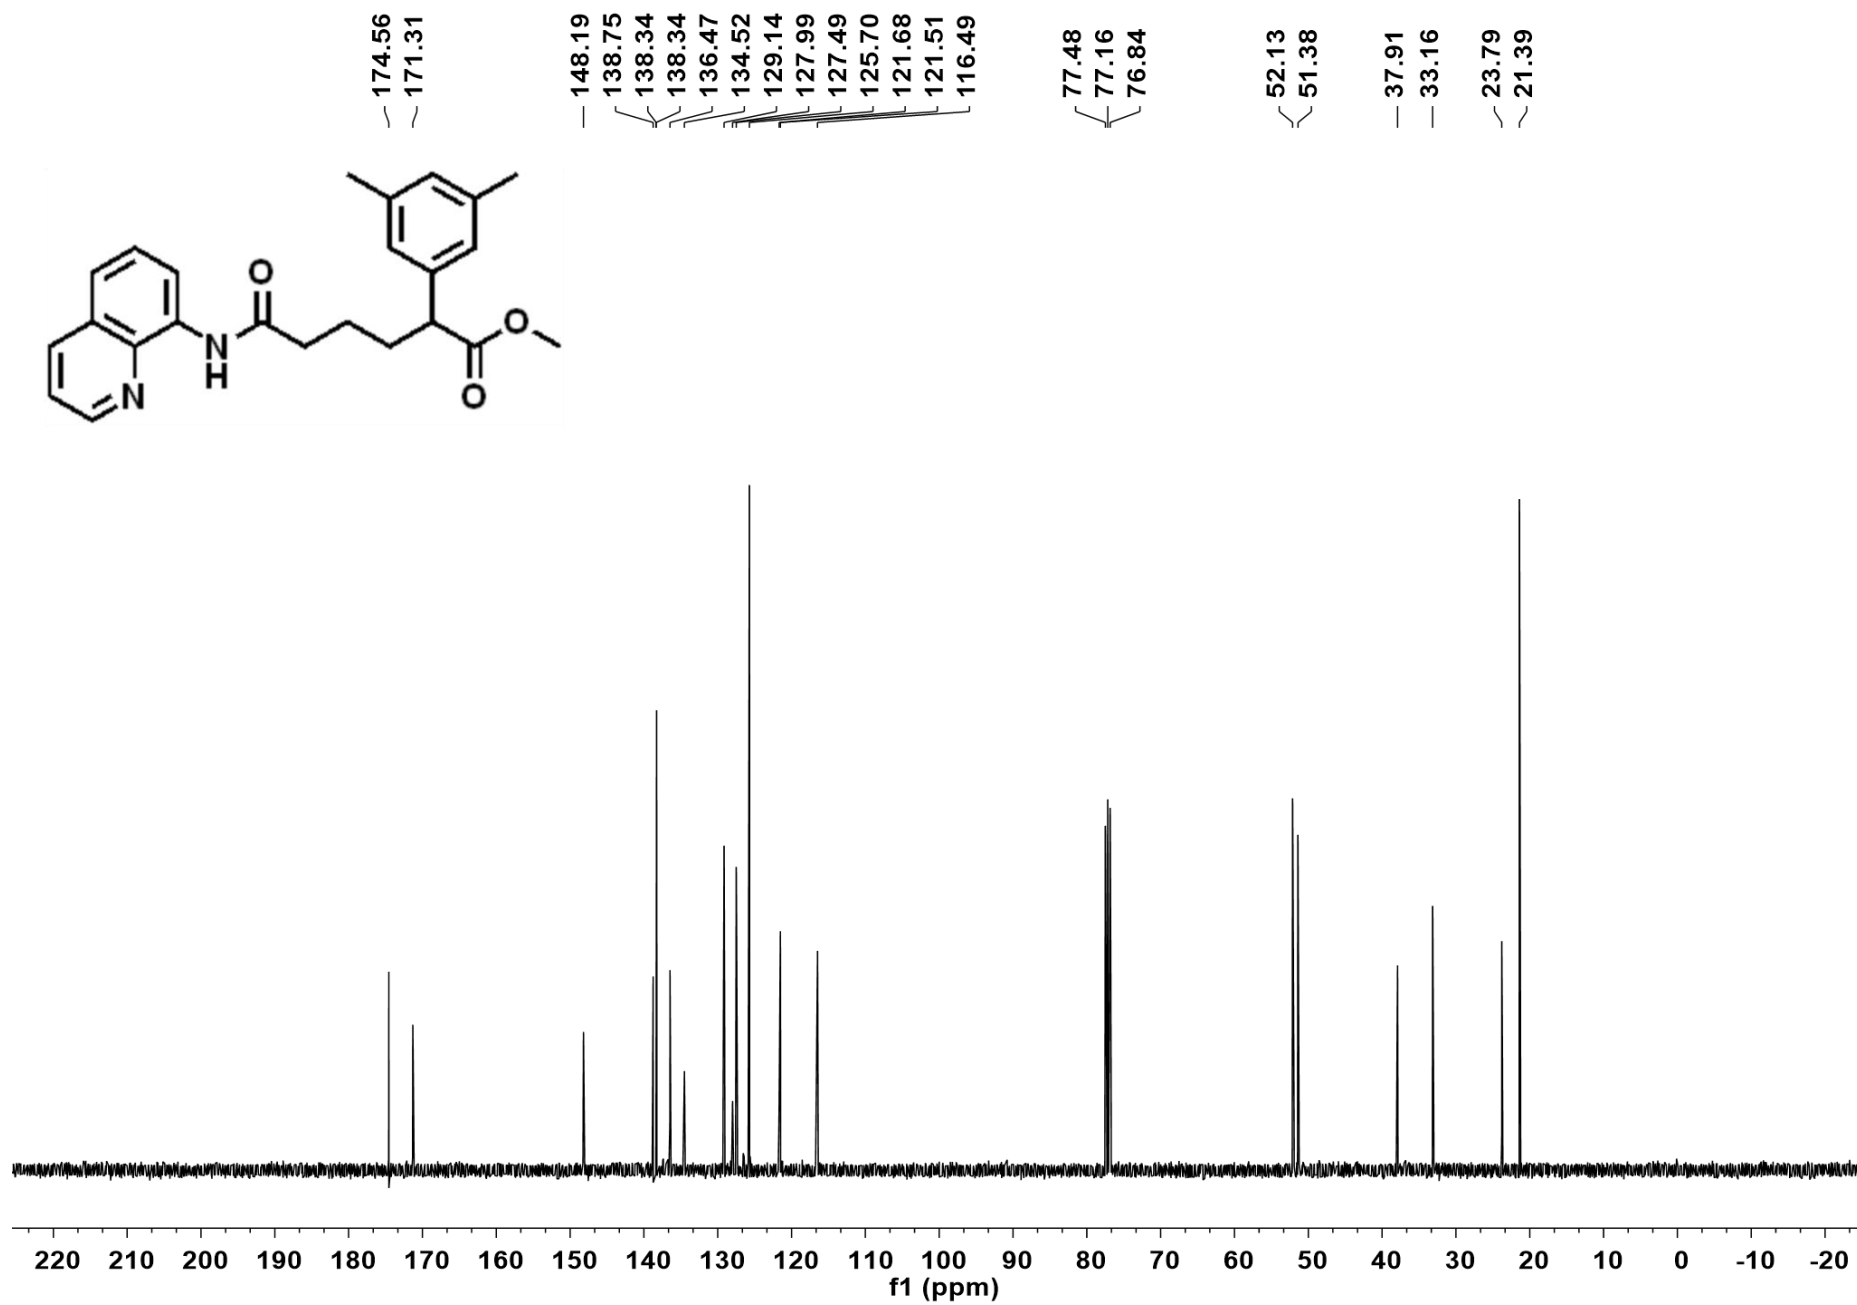

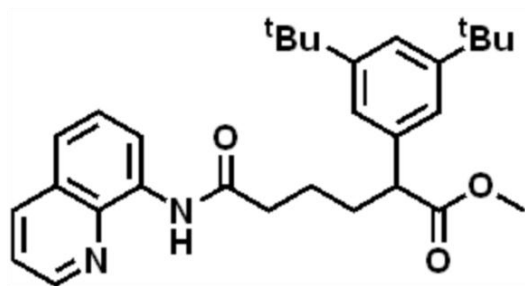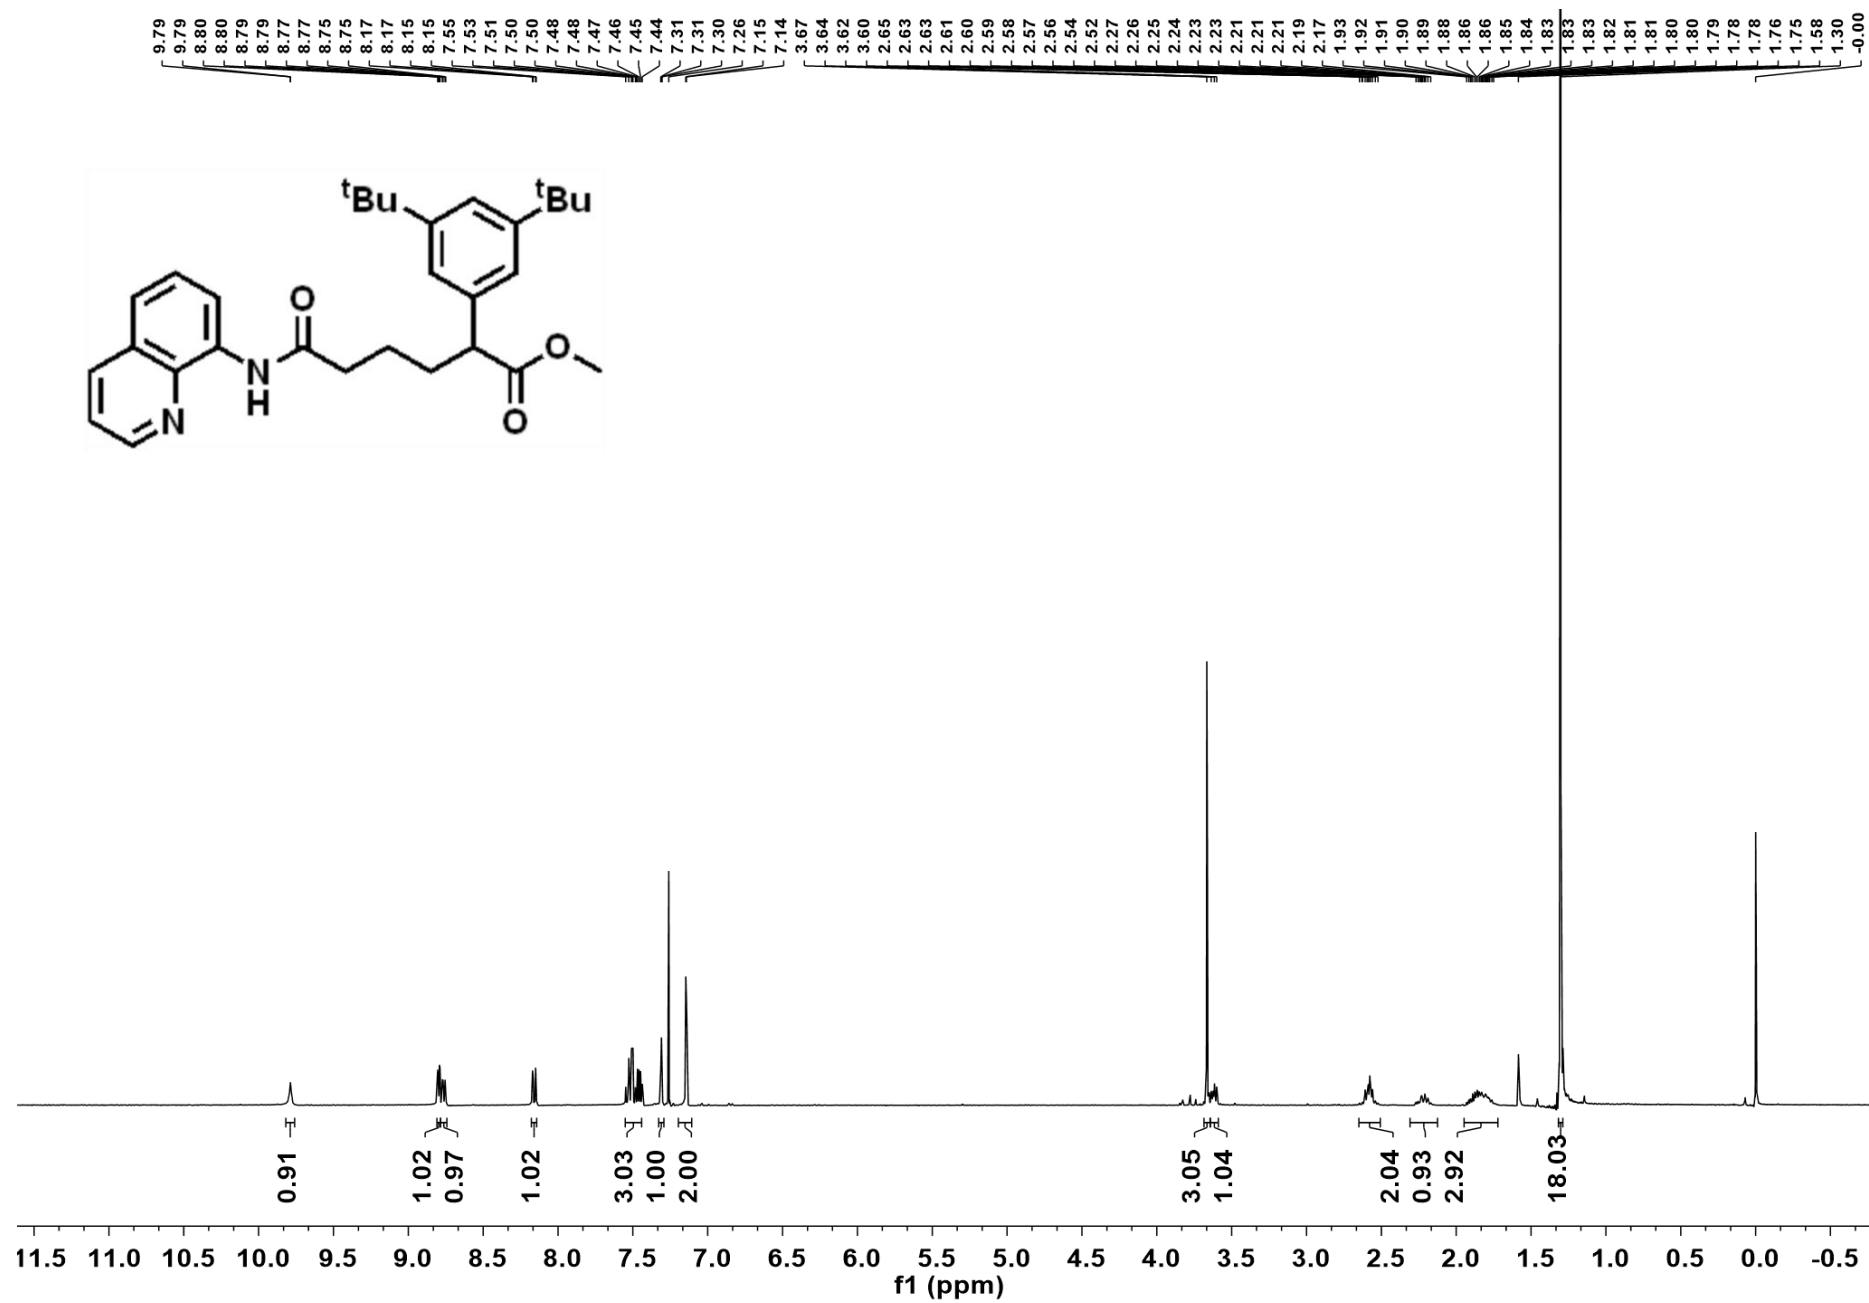

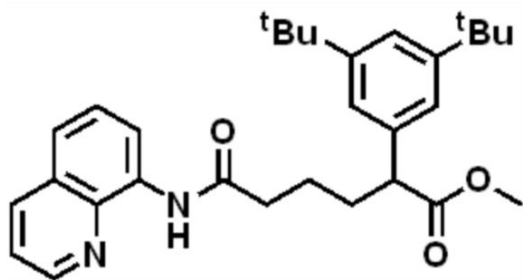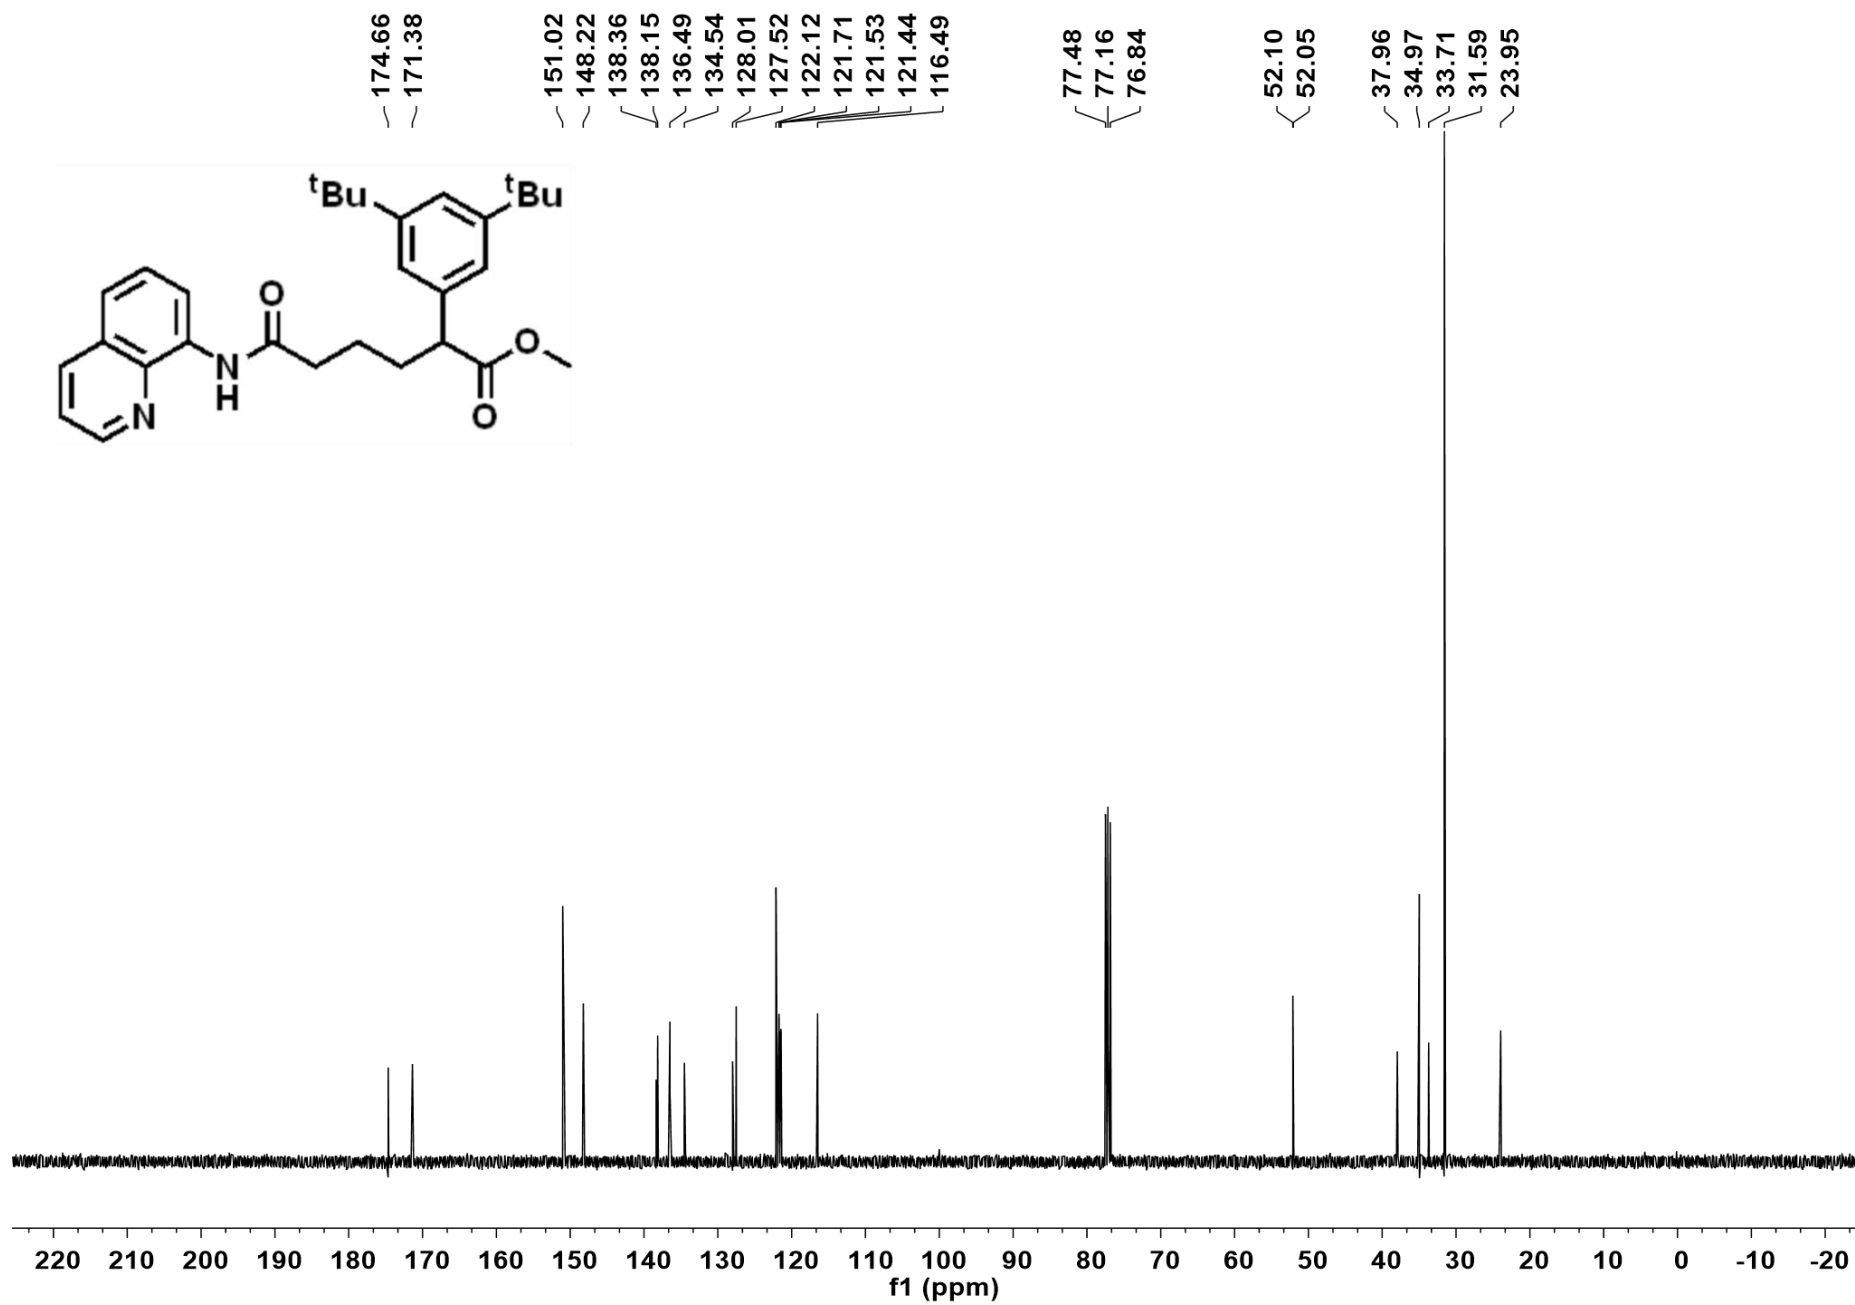

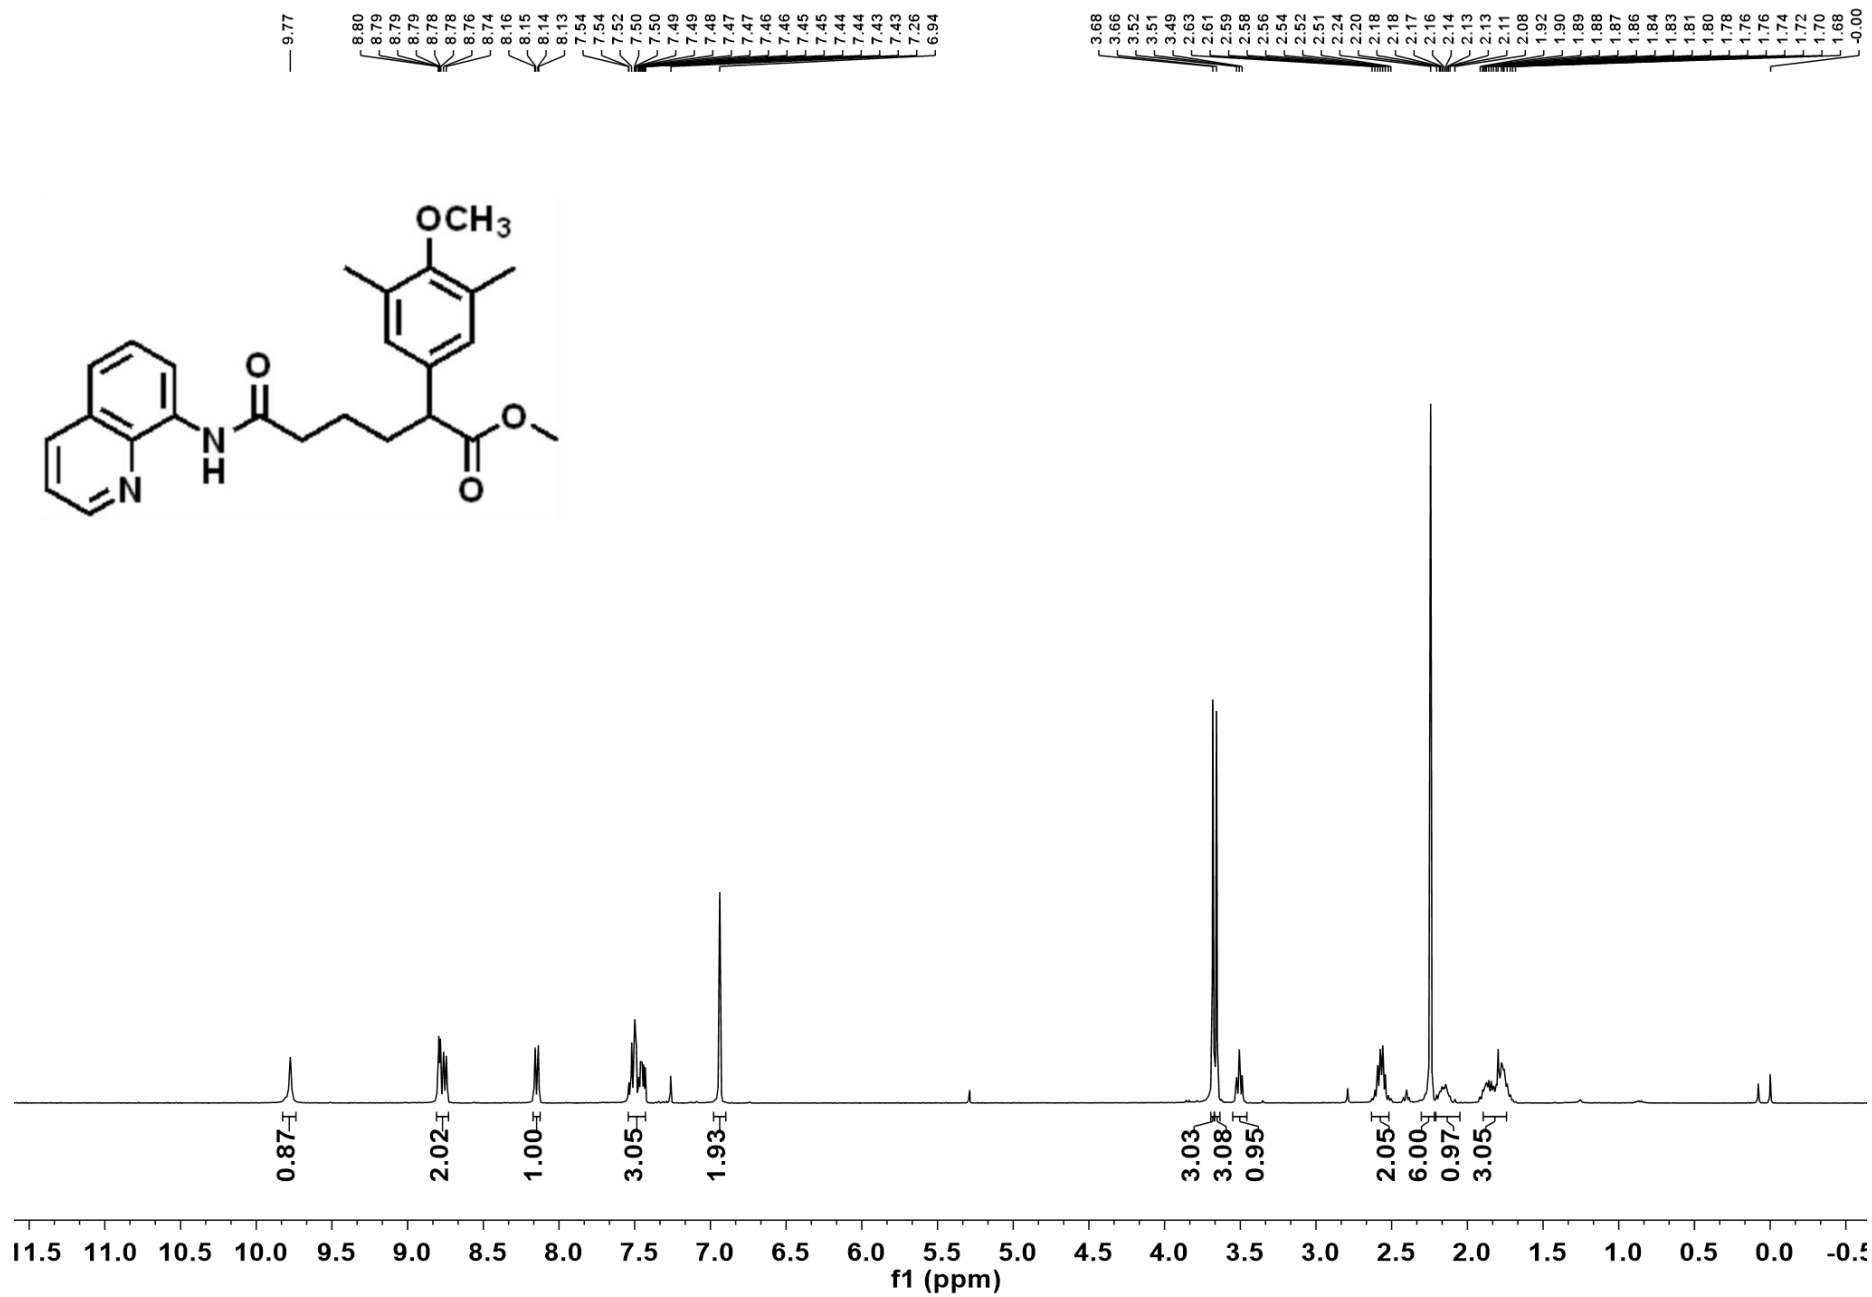

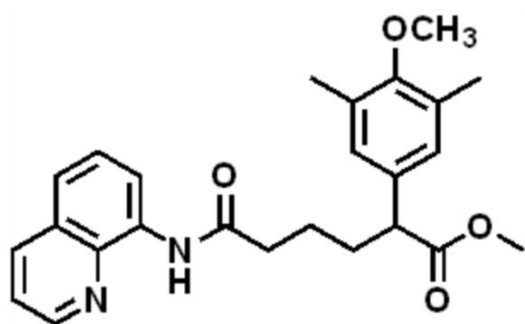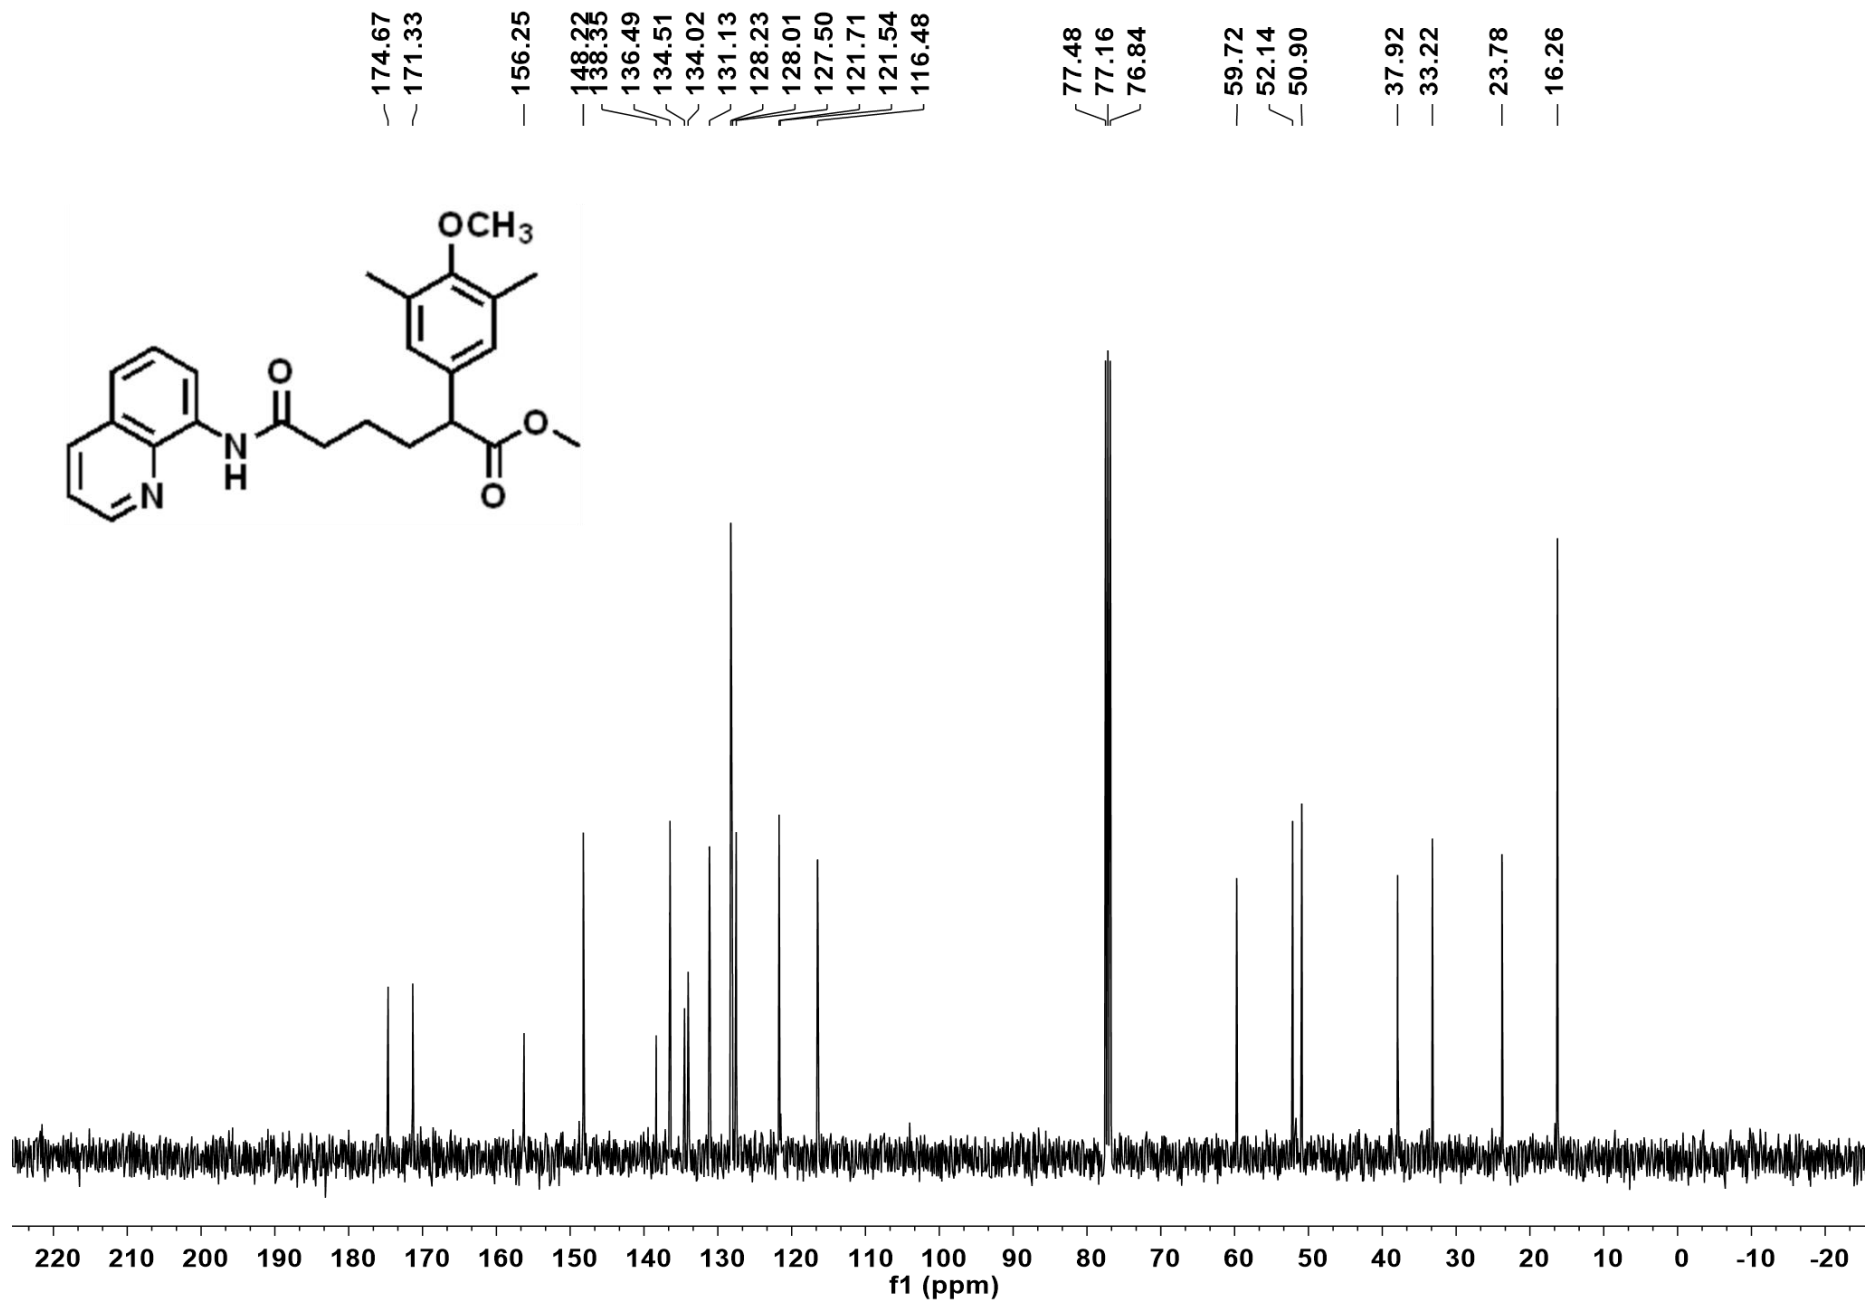

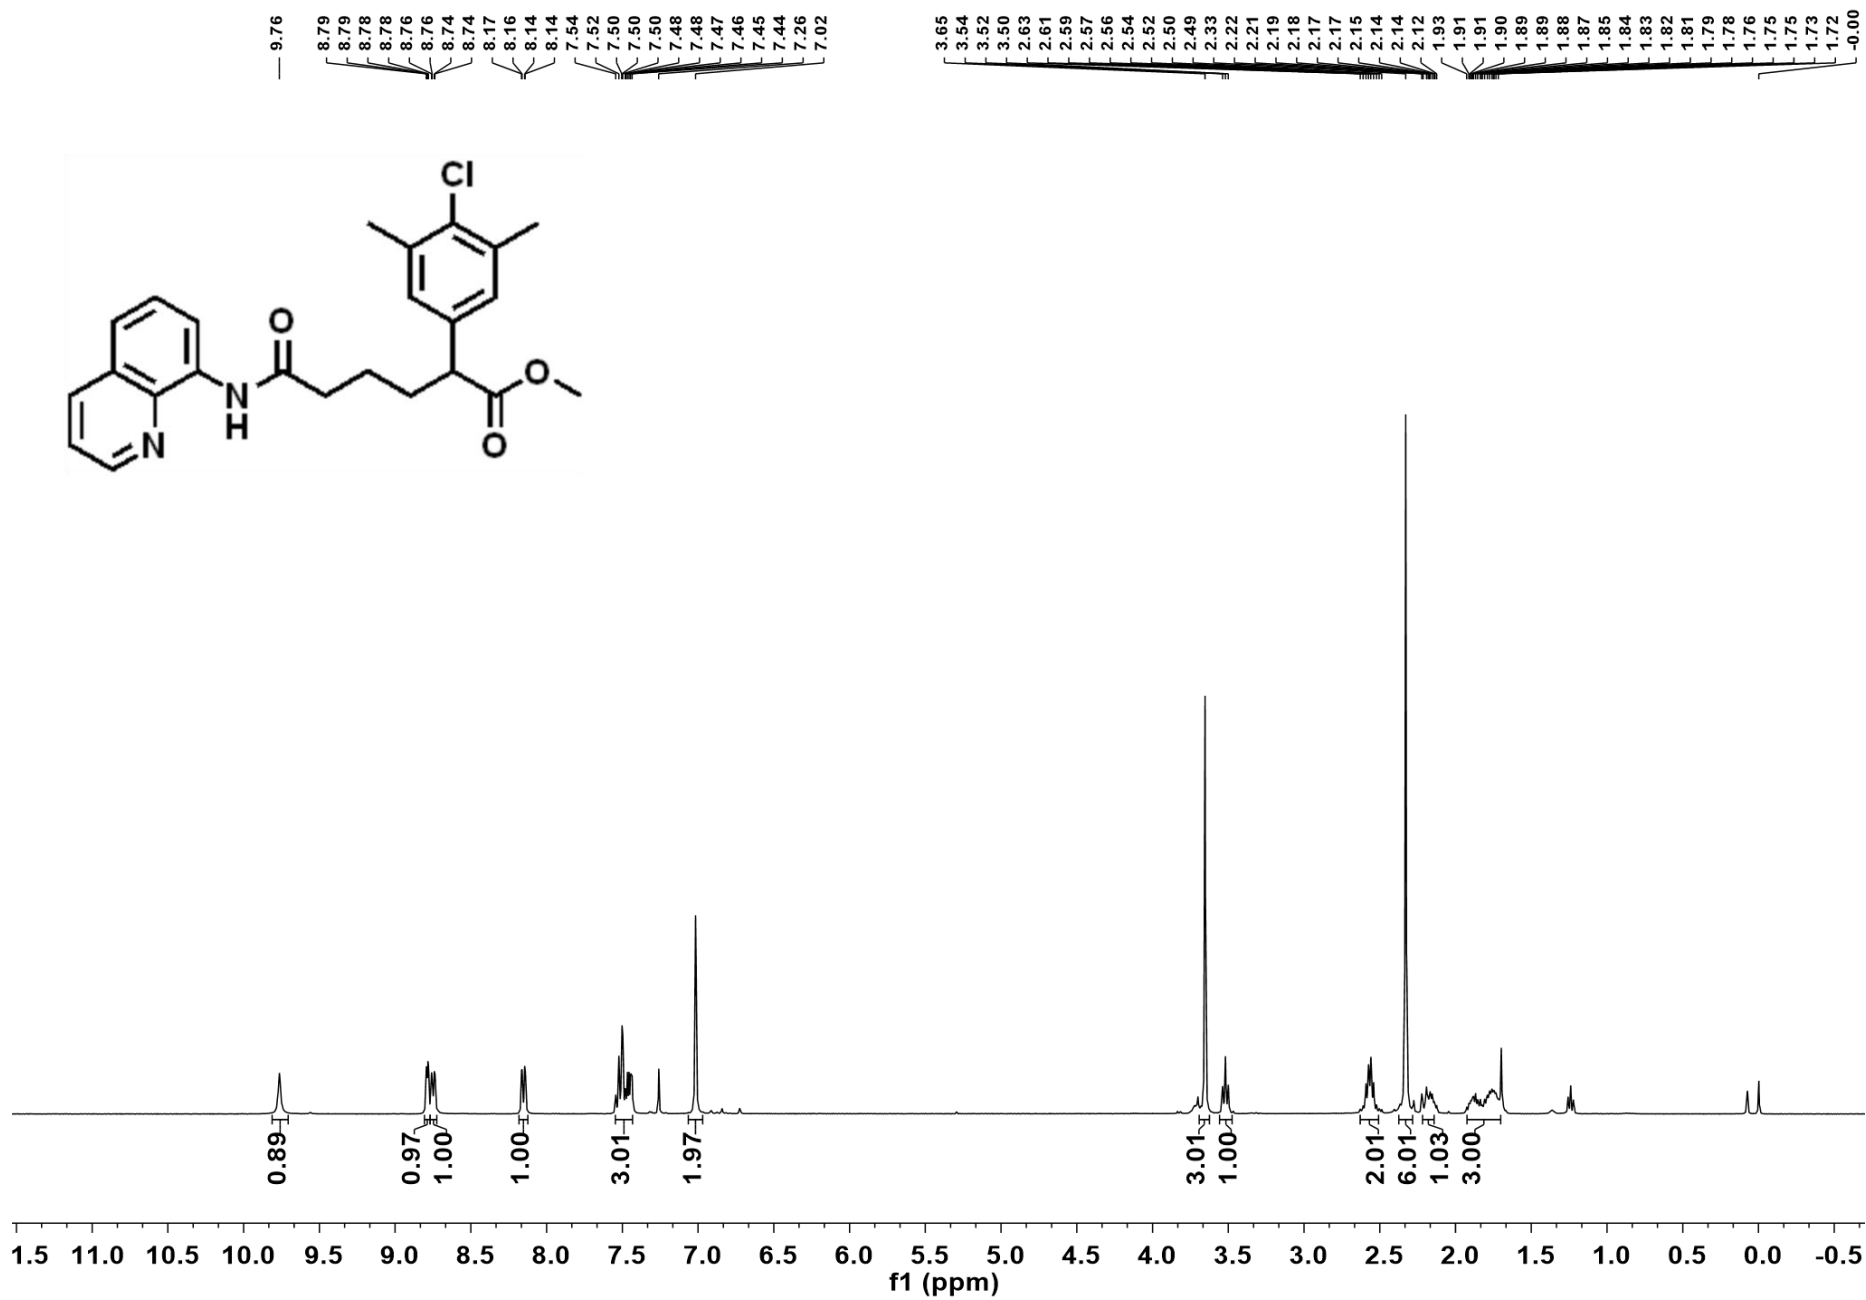



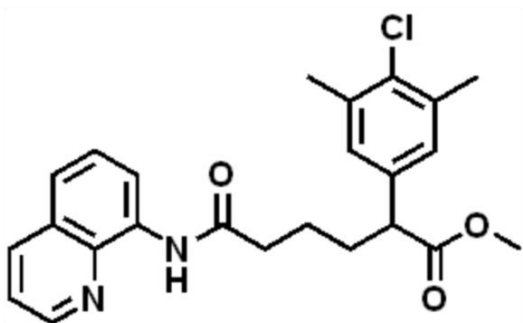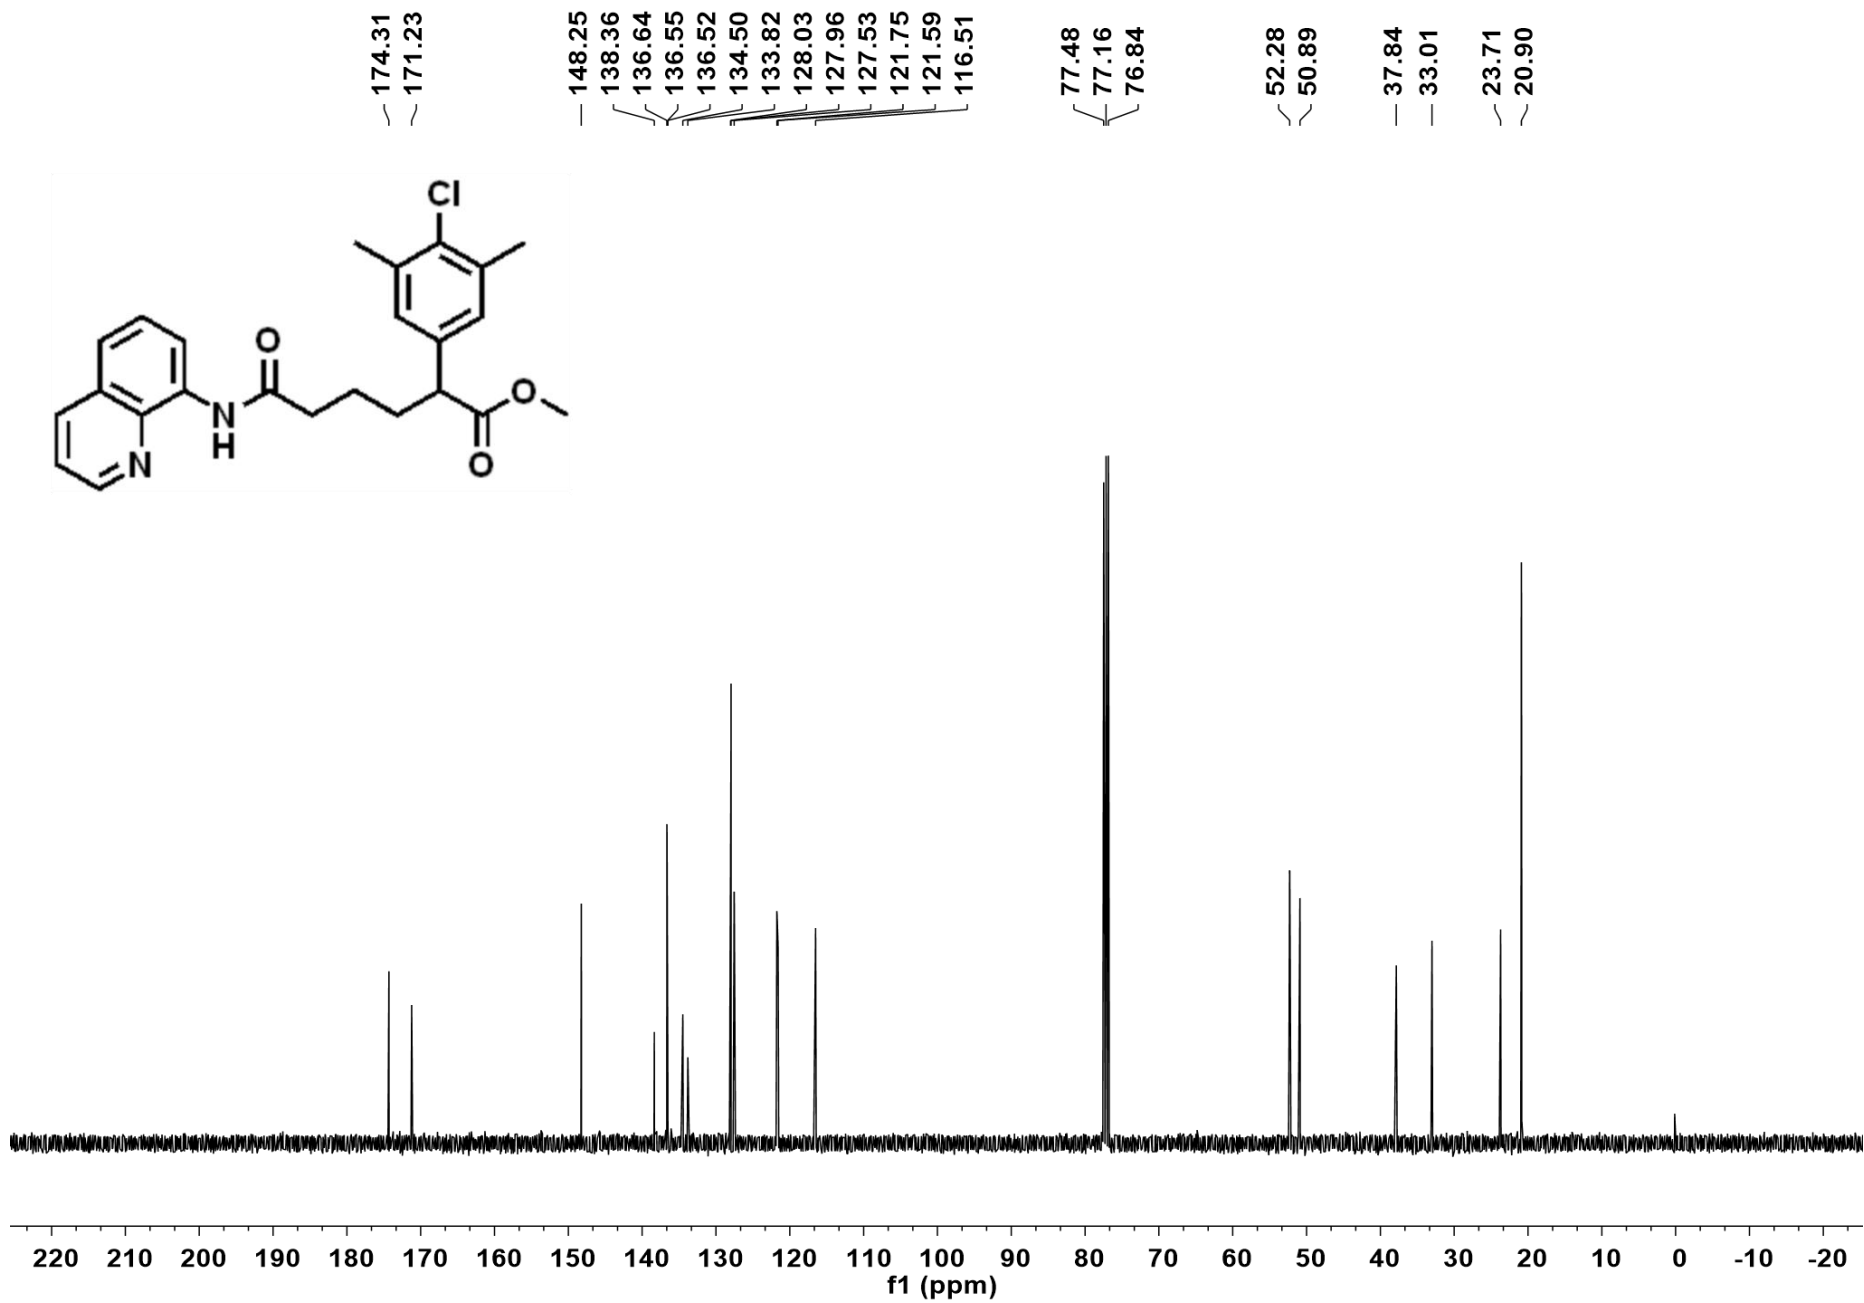

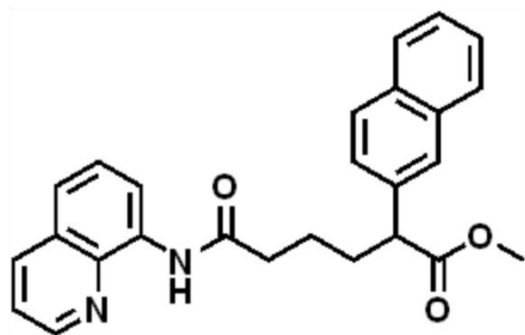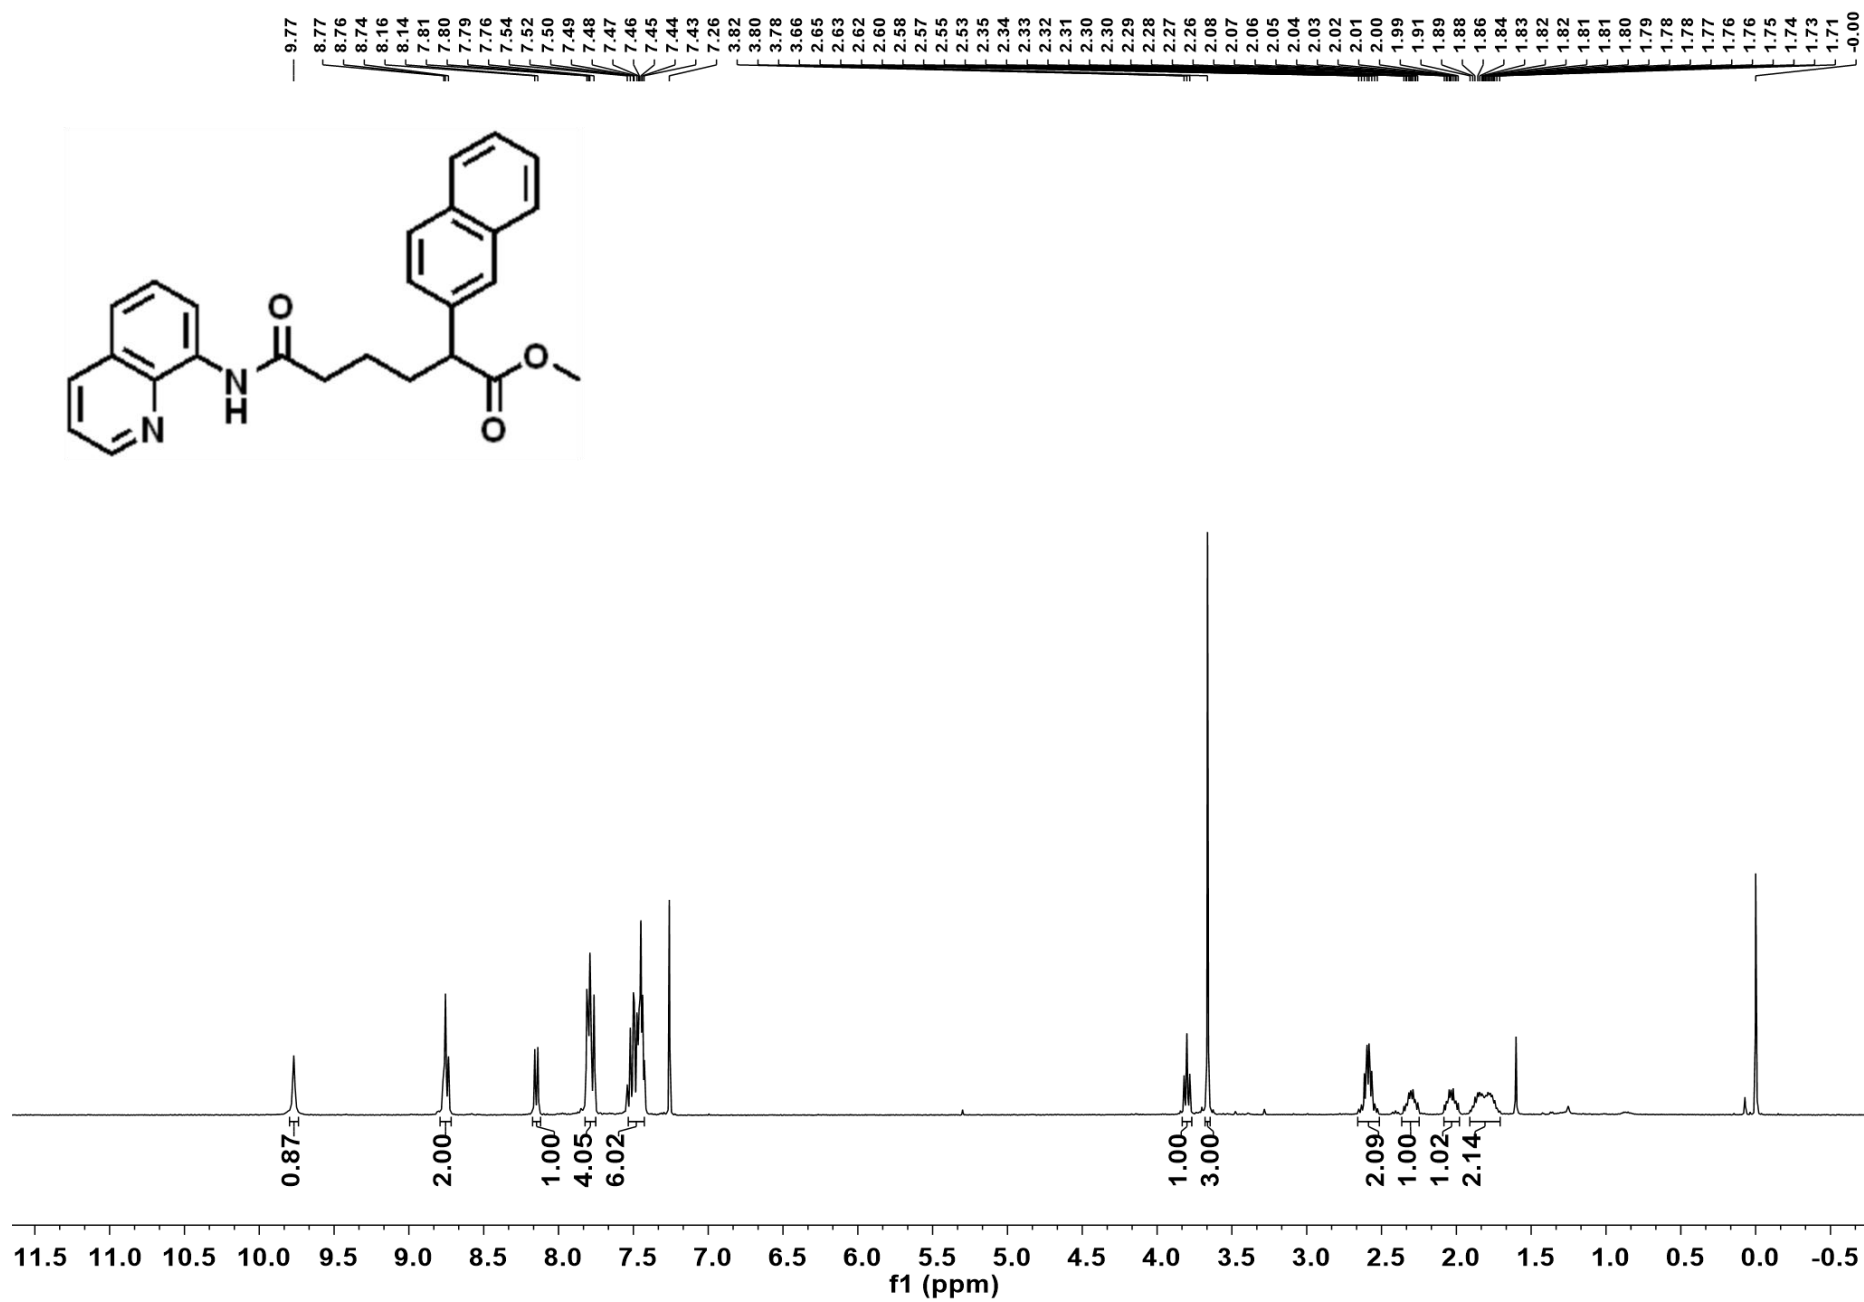

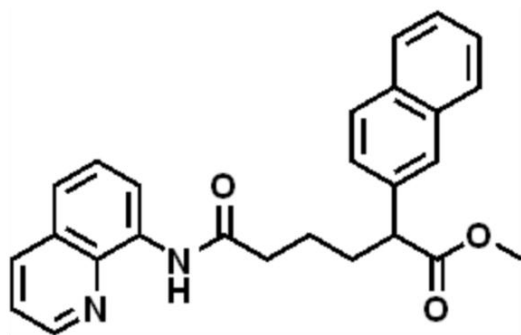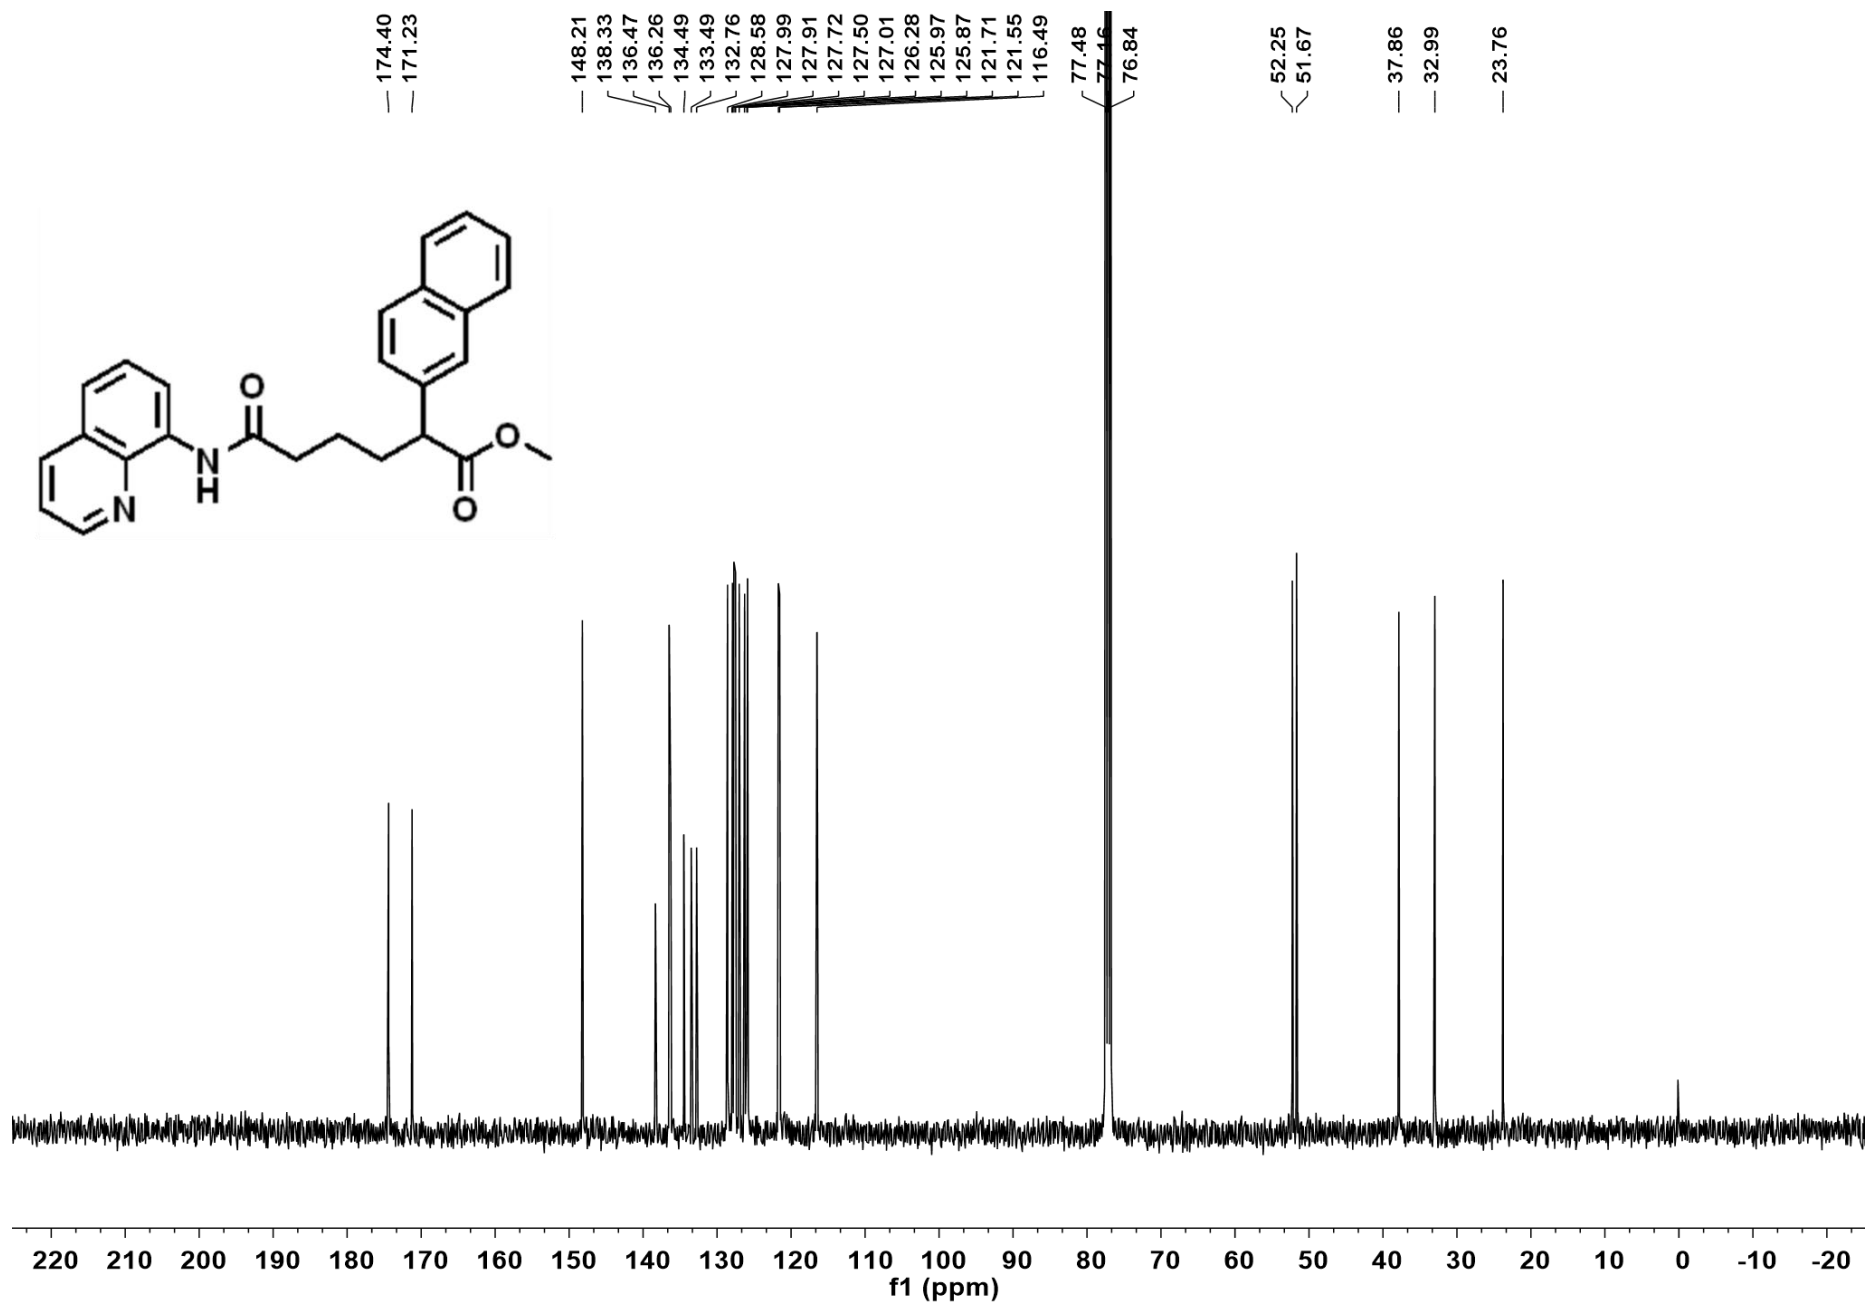

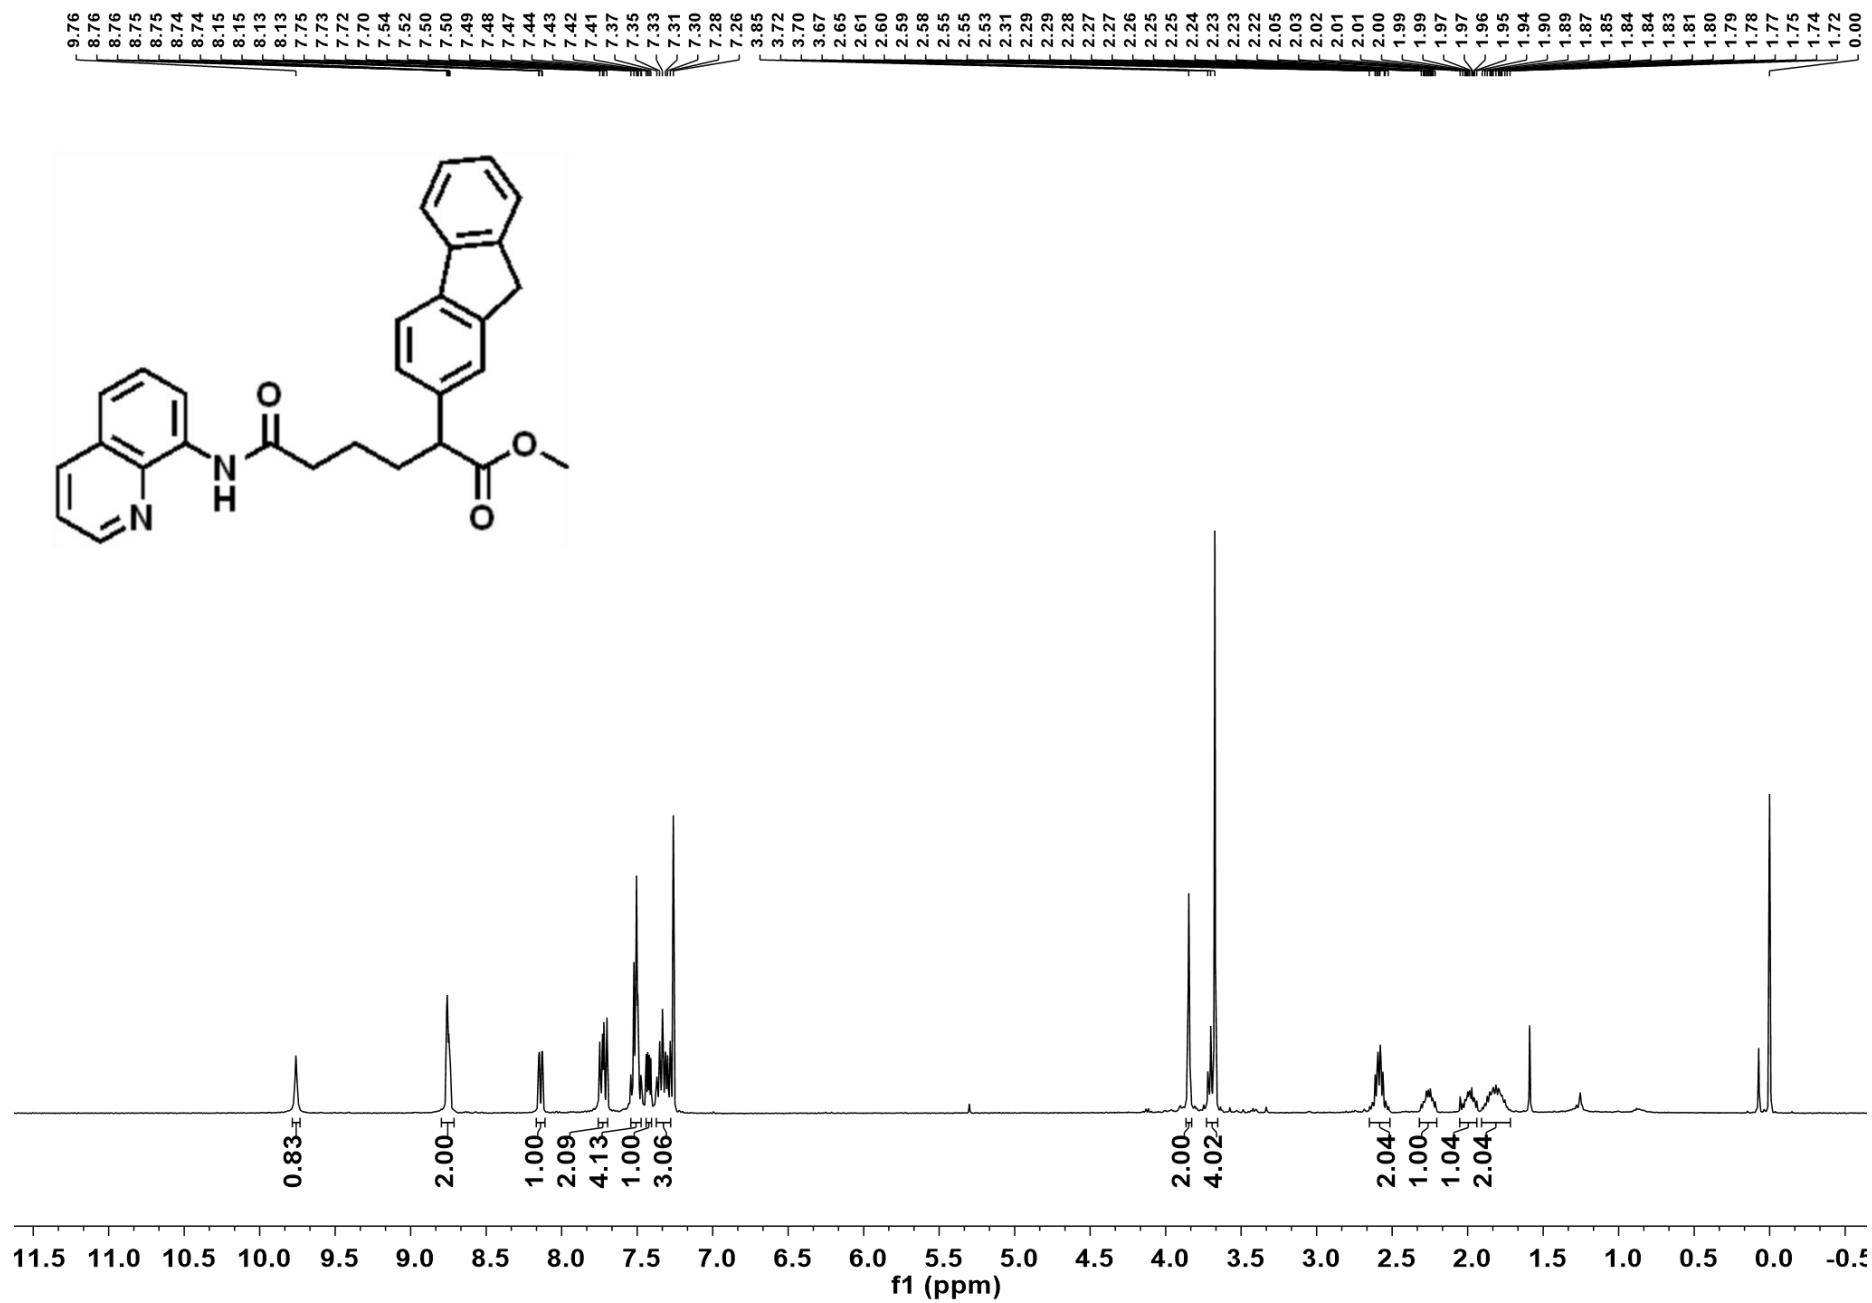

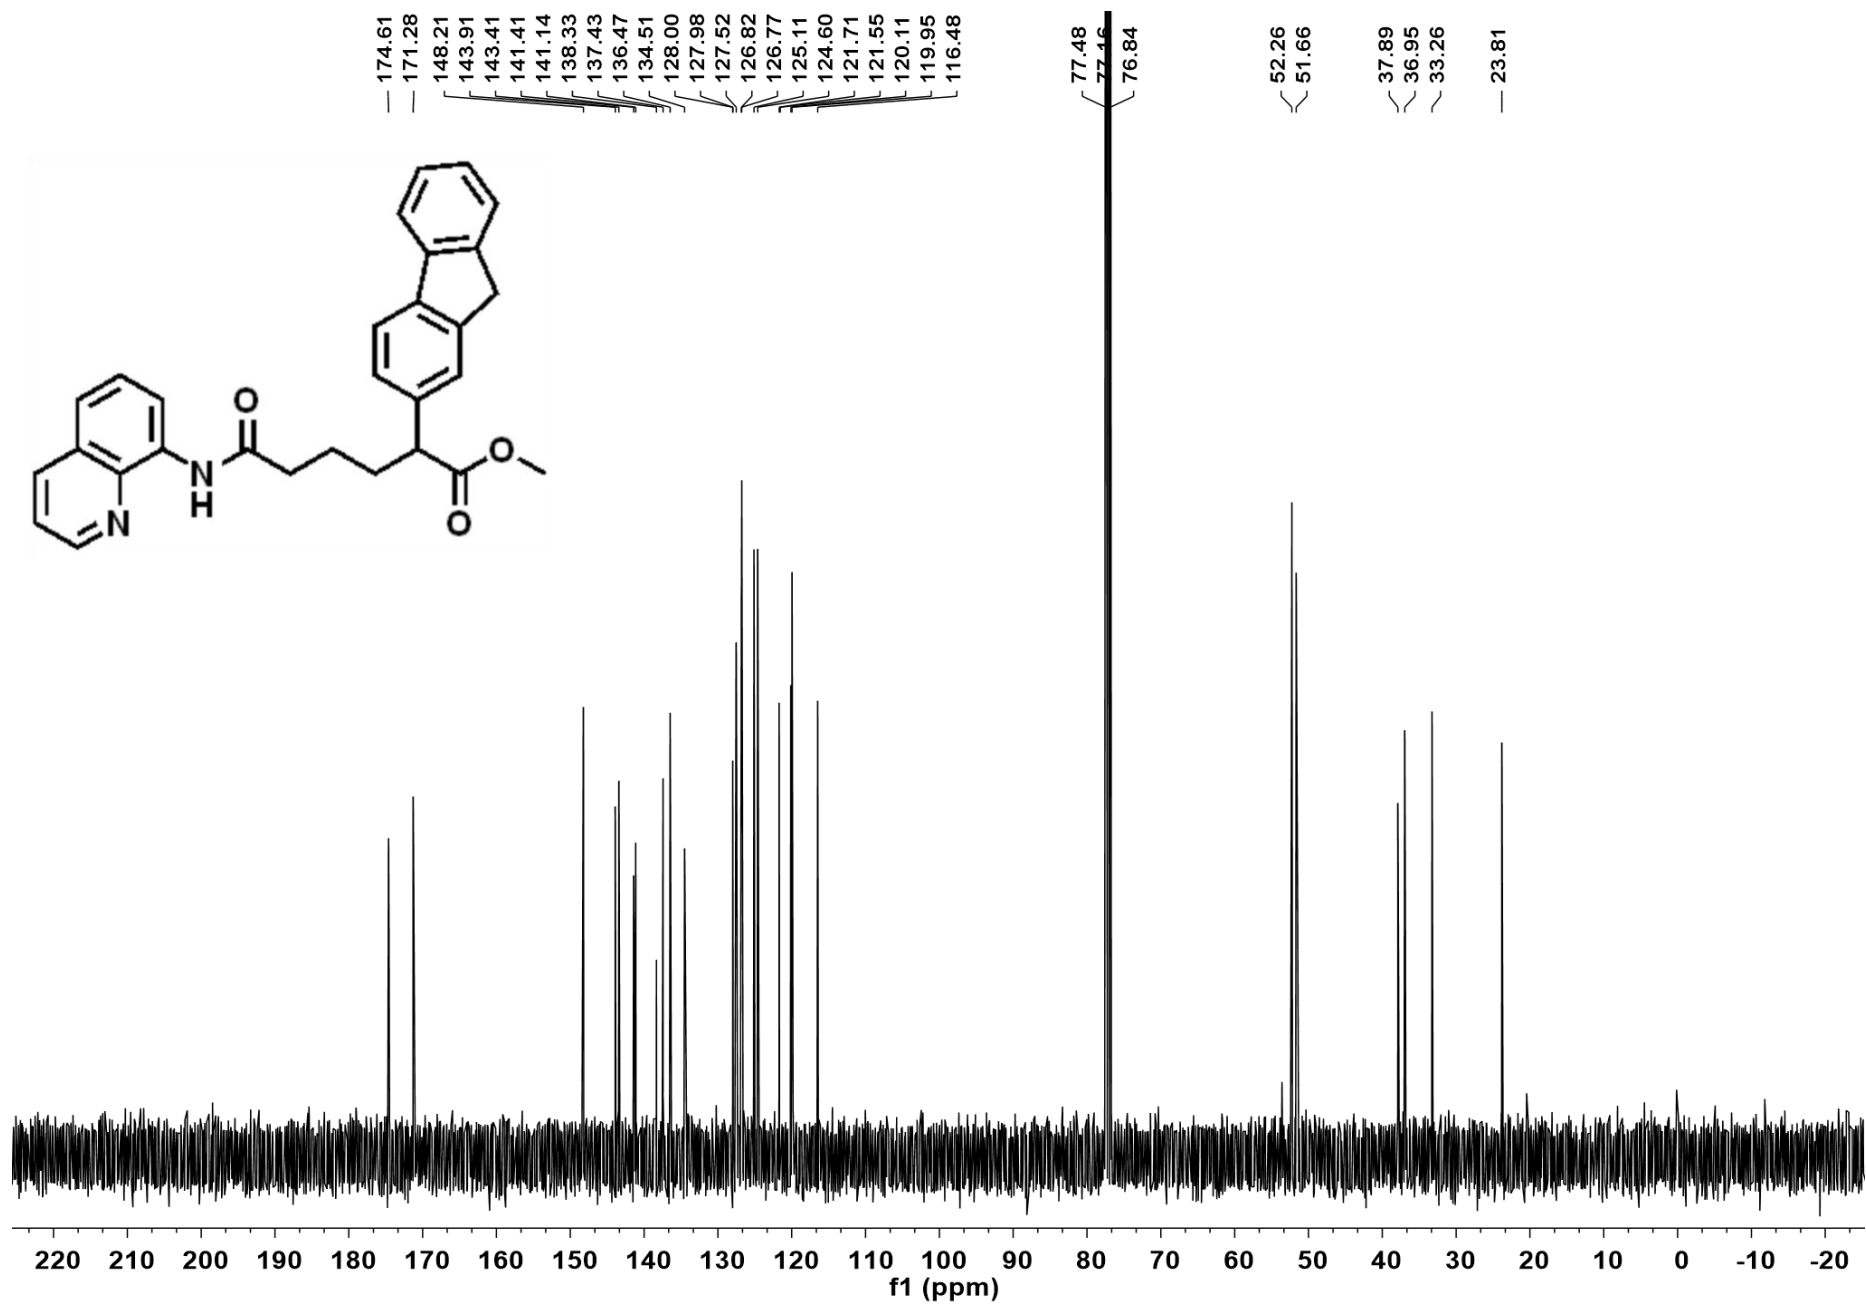

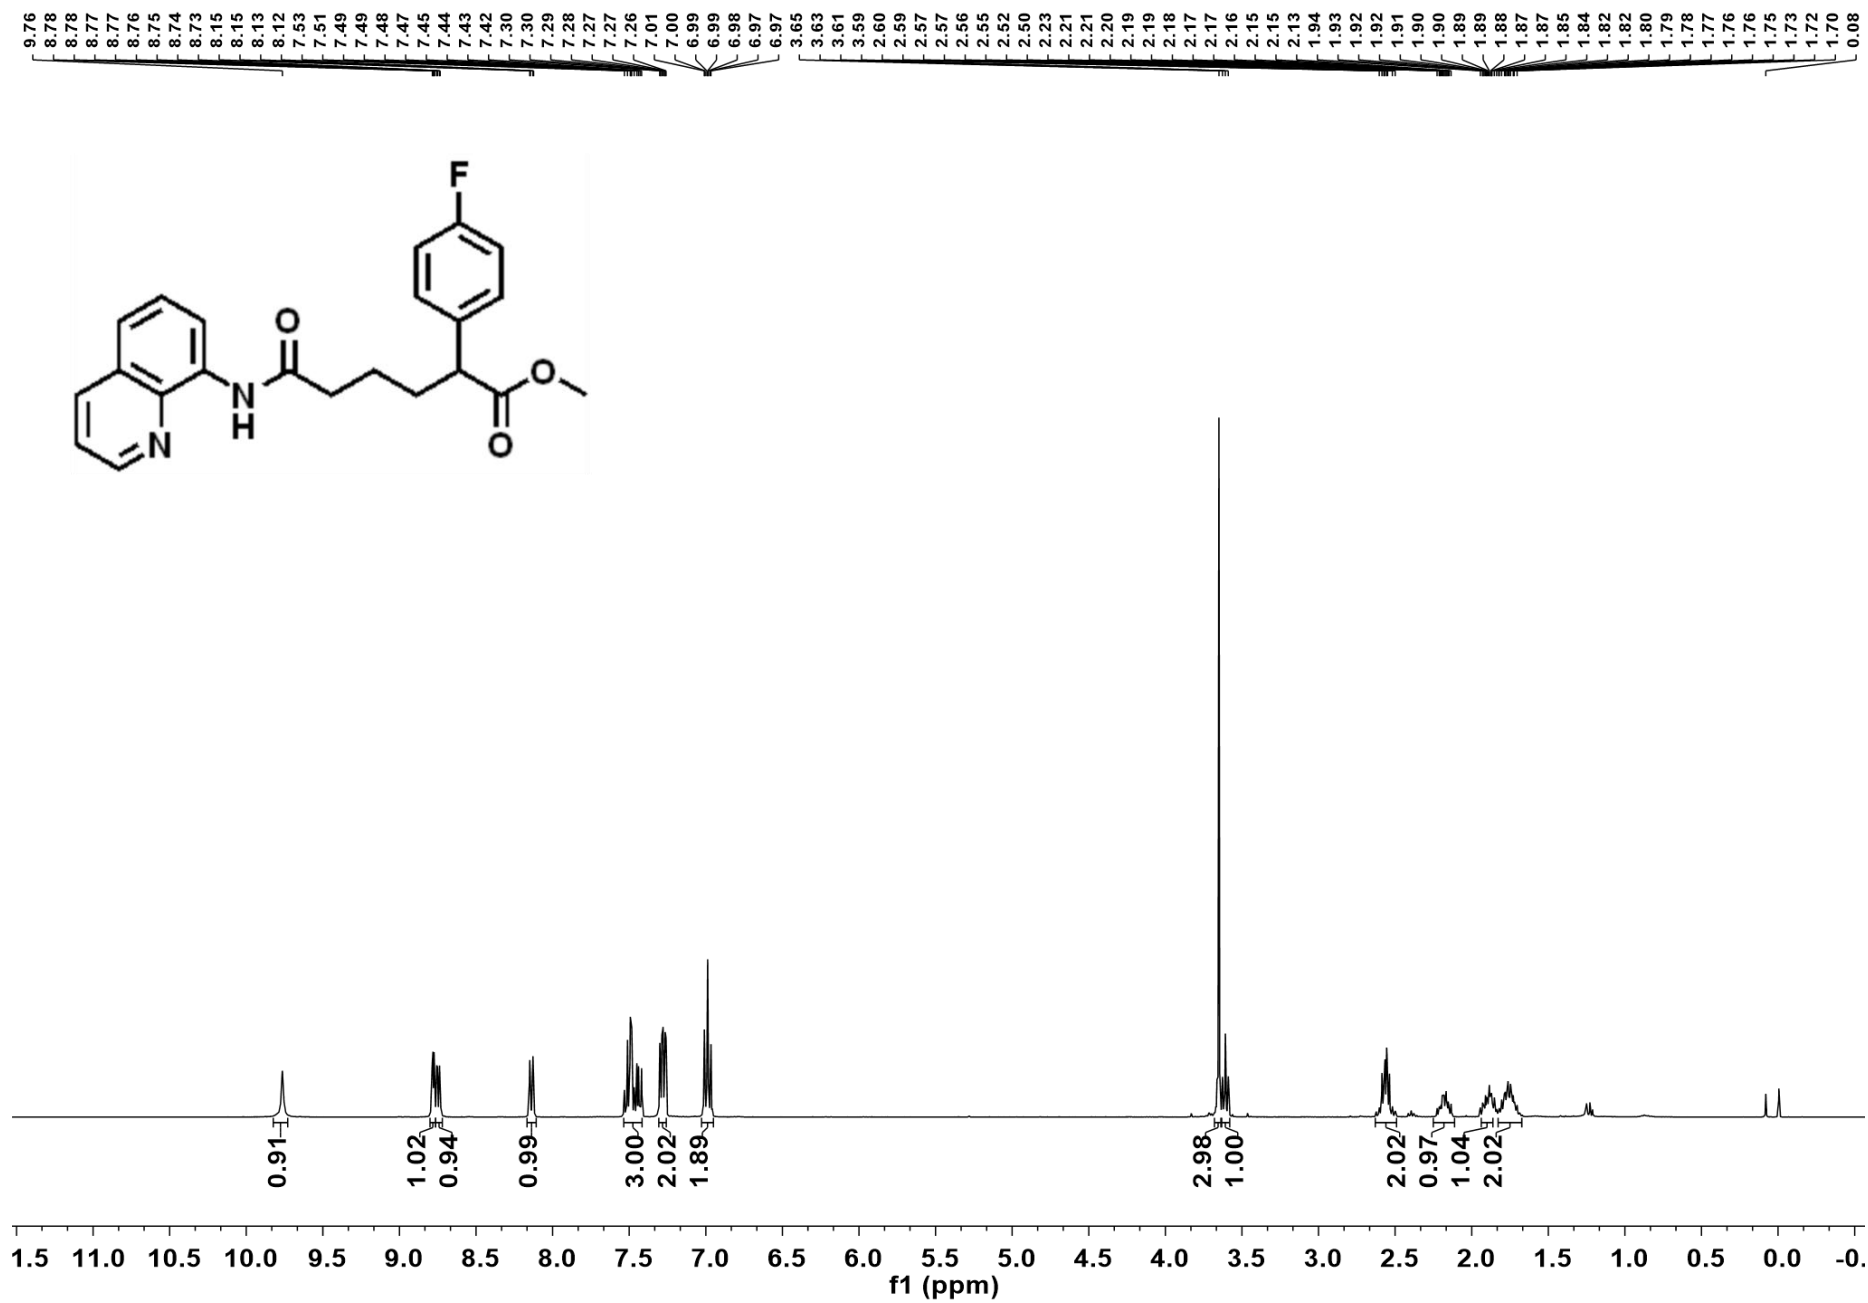

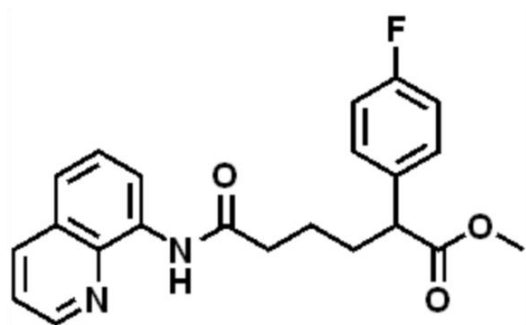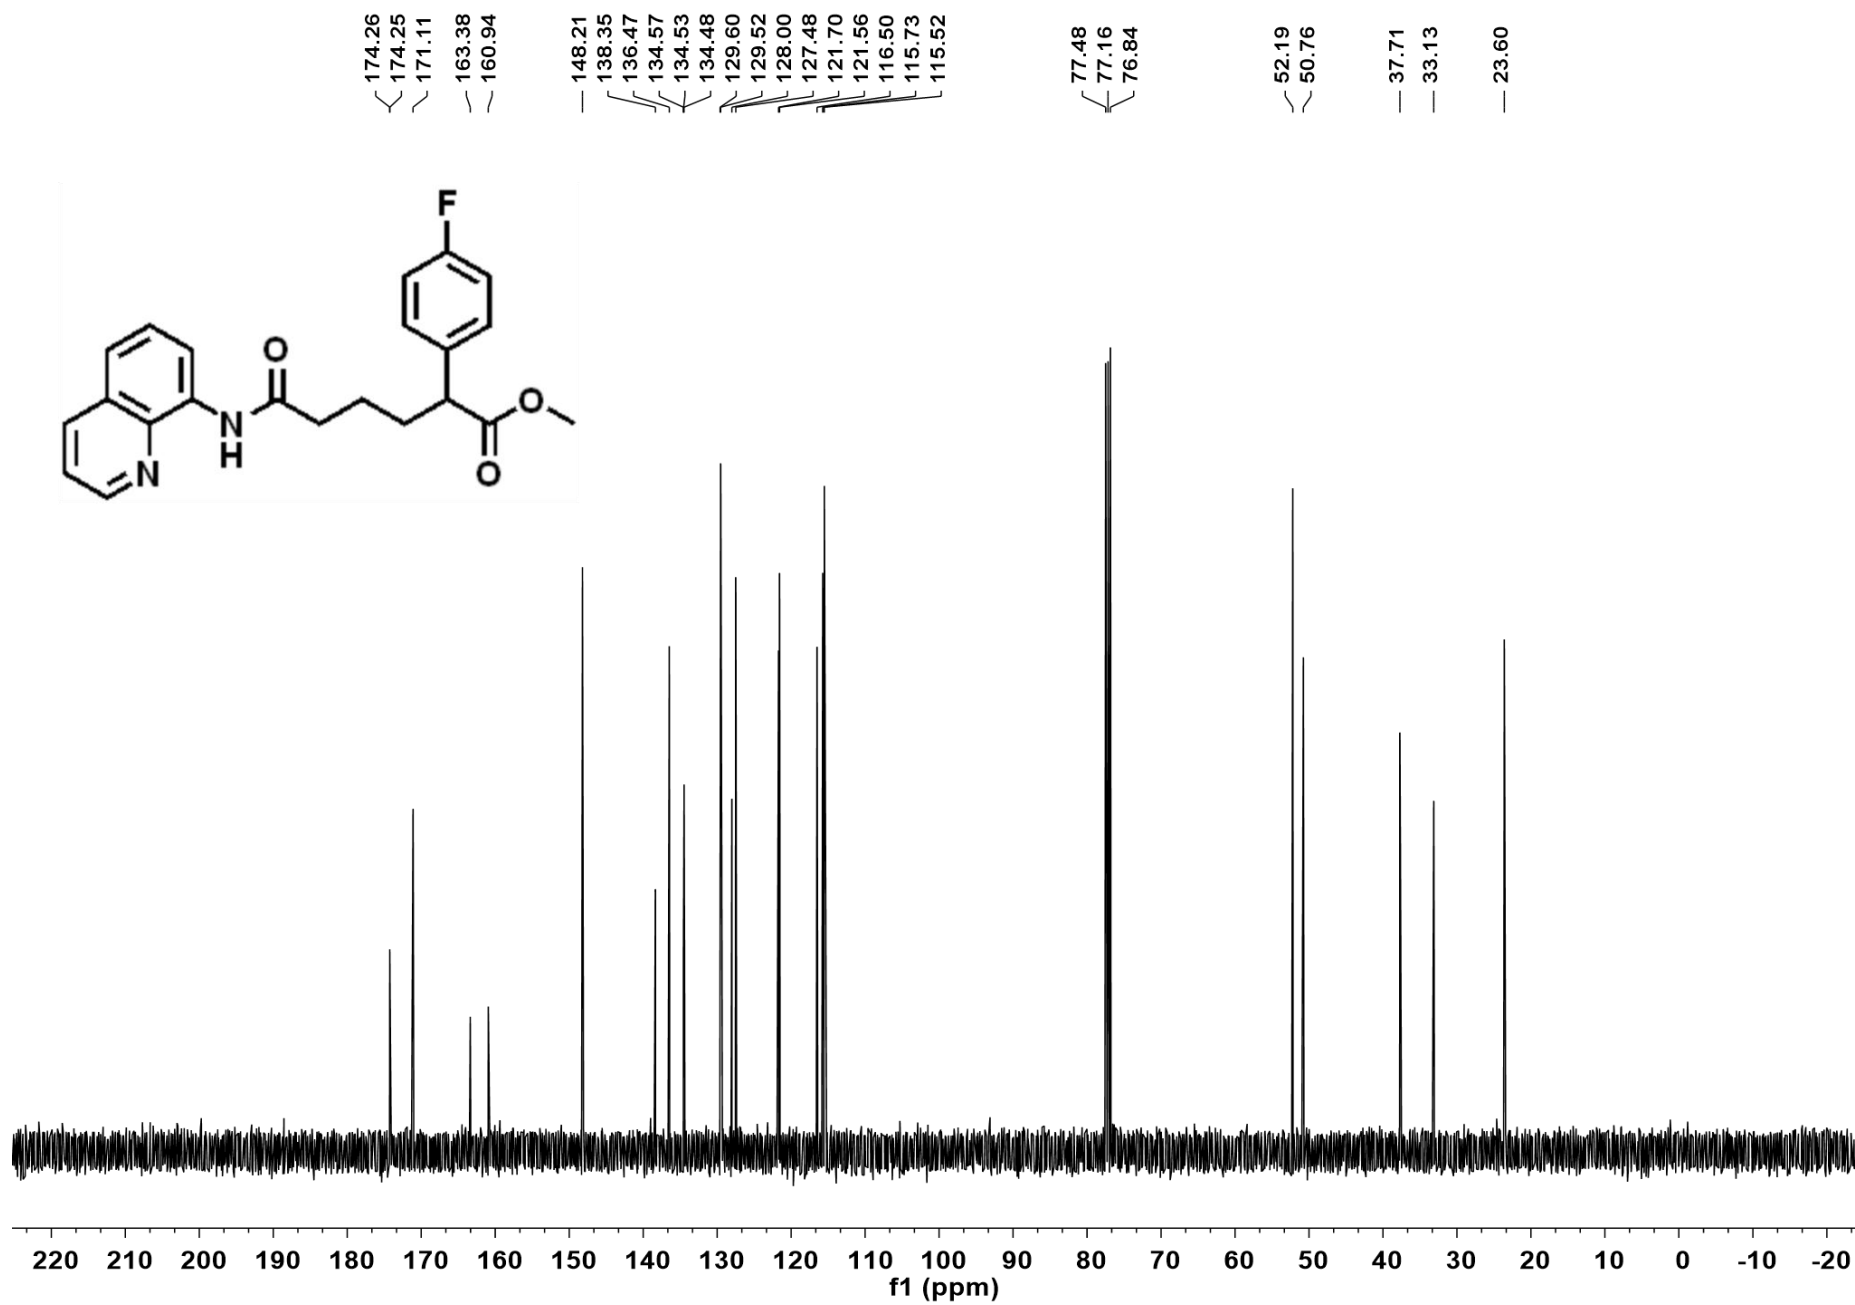

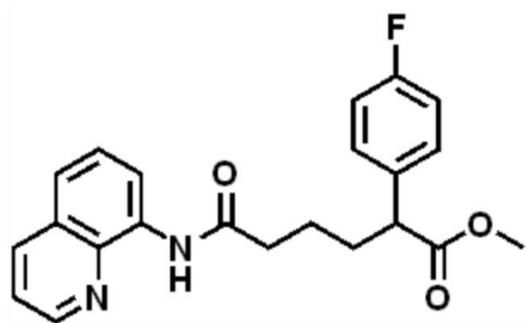

-115.21  
-115.22  
-115.23  
-115.24  
-115.25  
-115.25  
-115.26  
-115.27  
-115.28

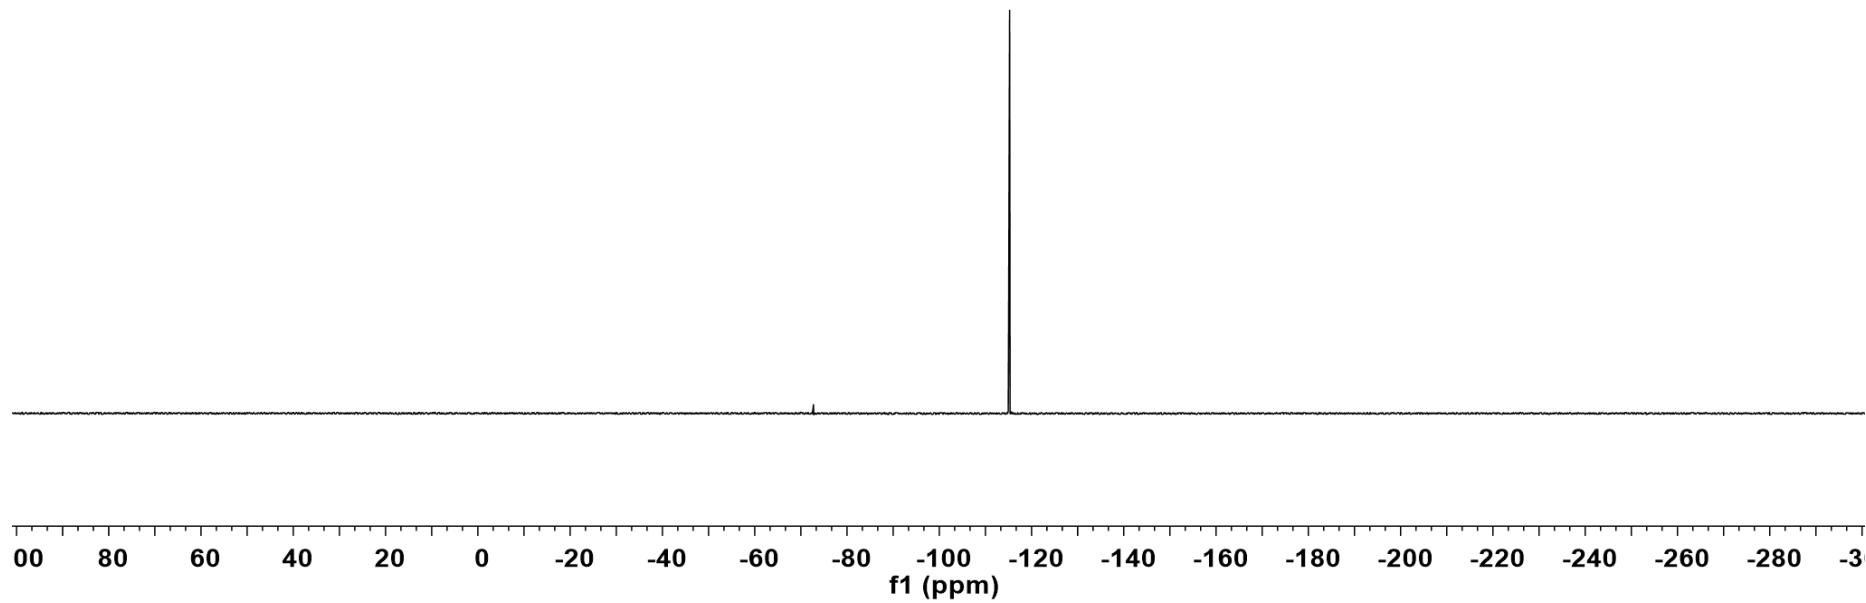



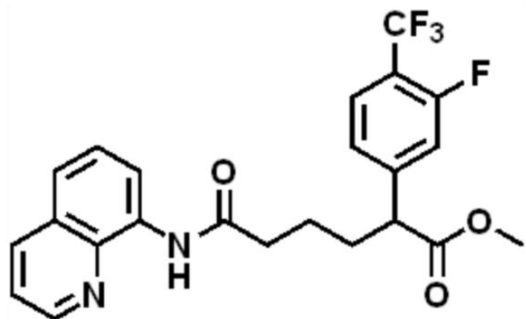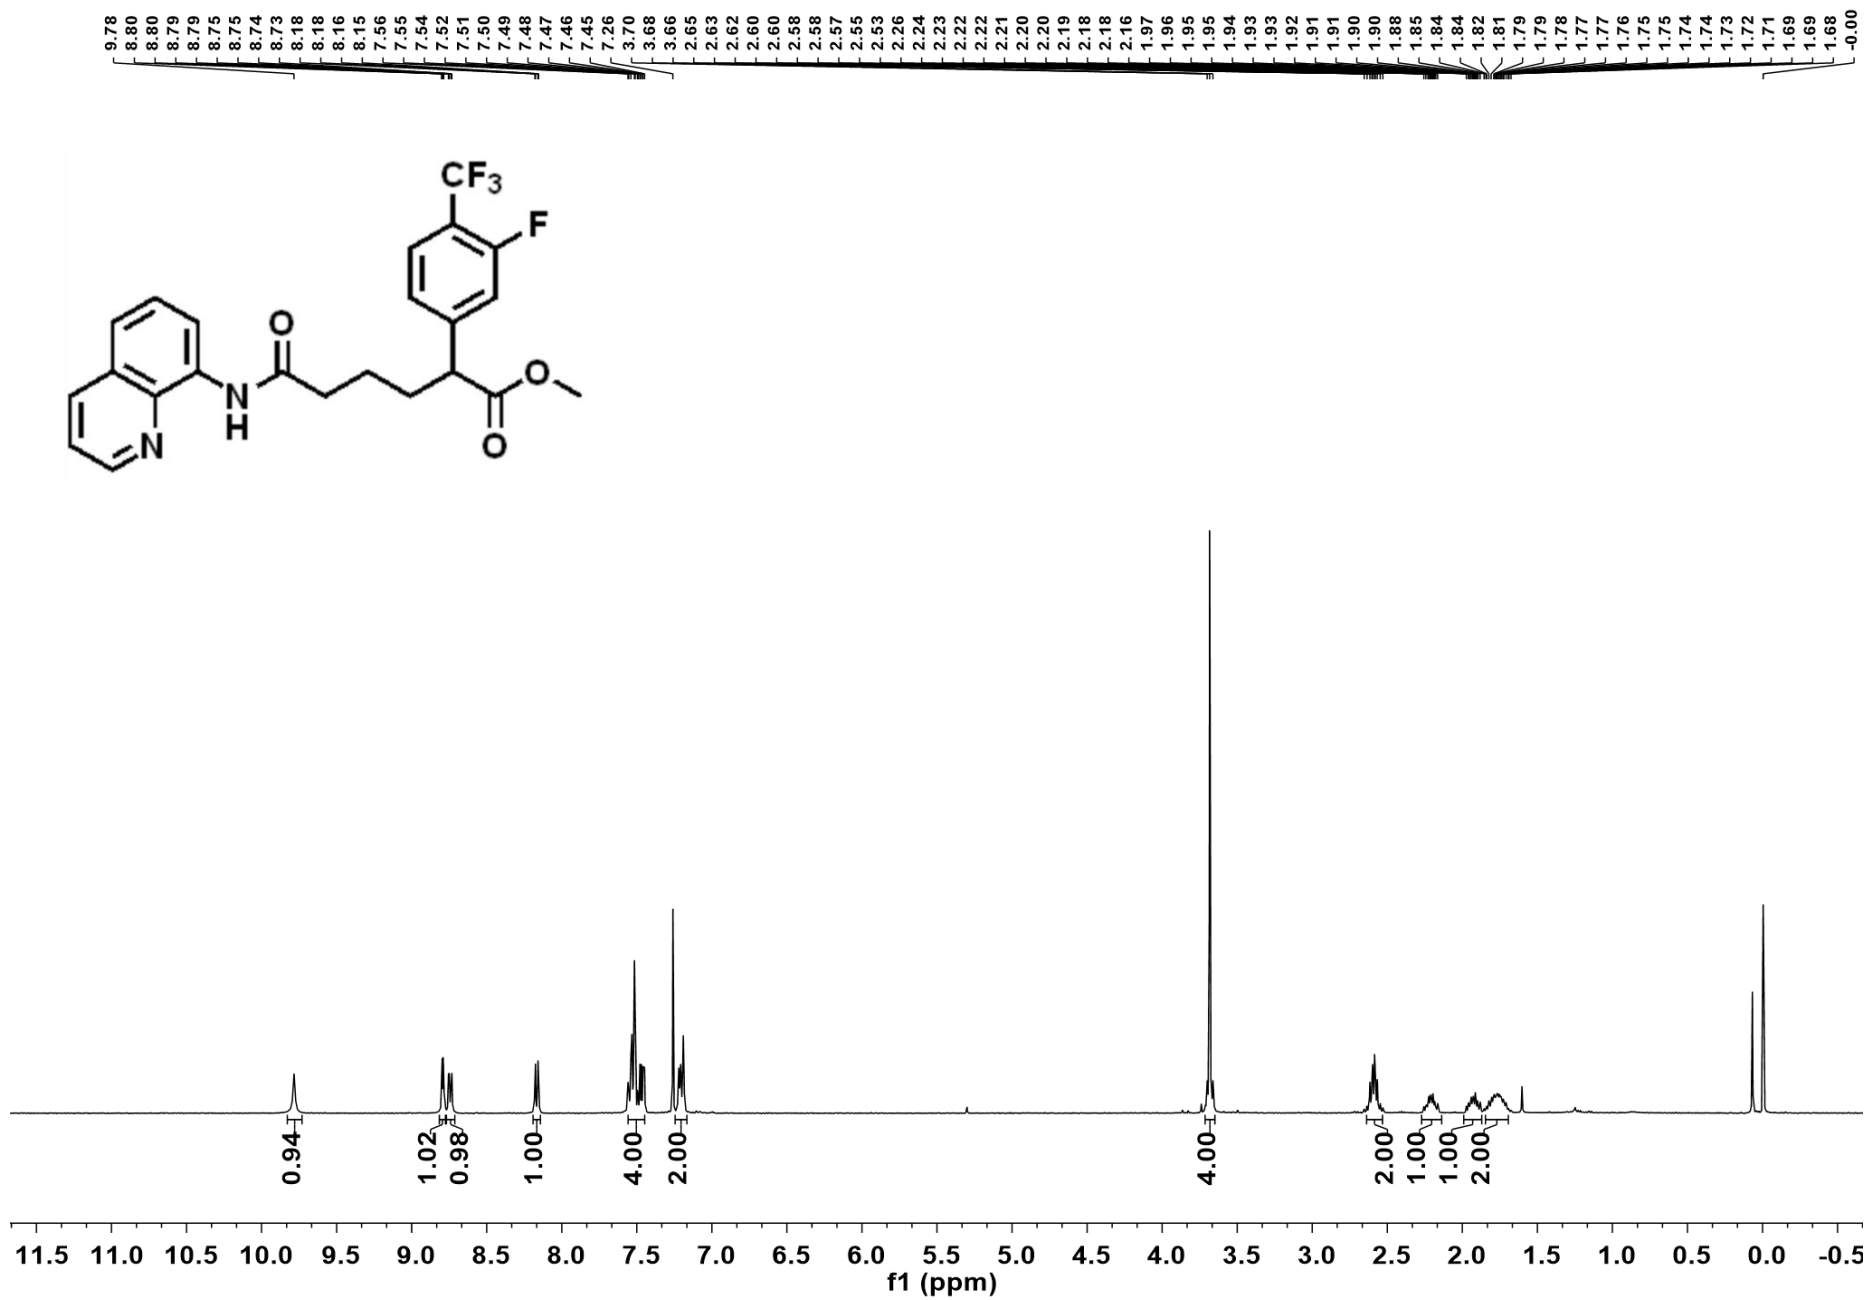

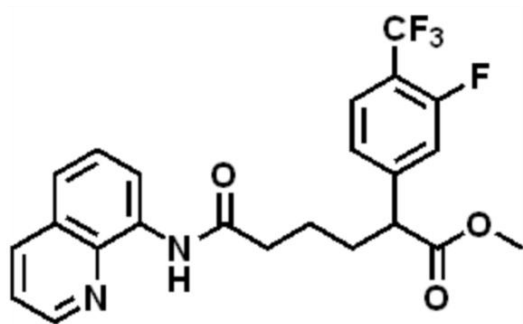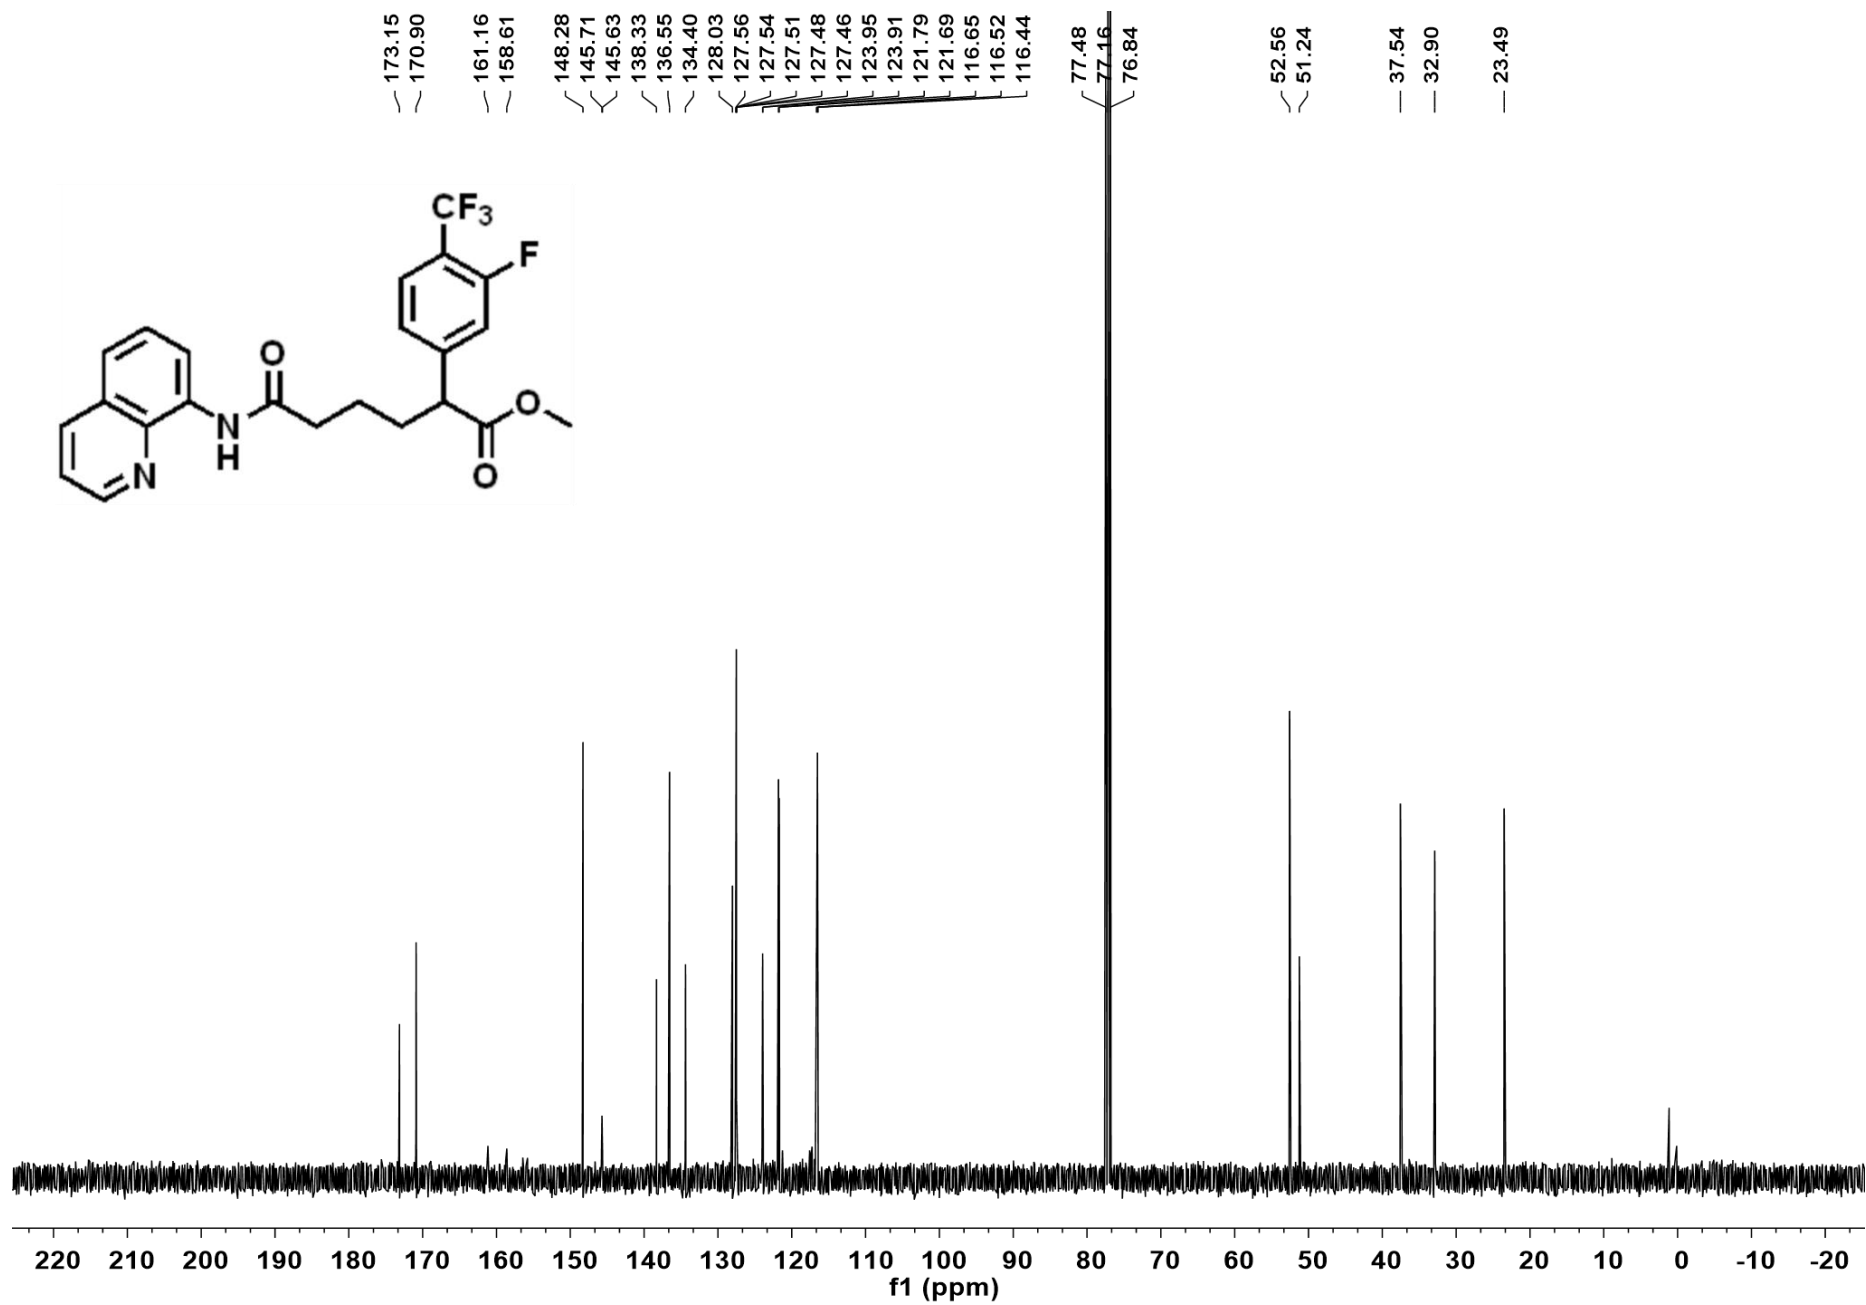

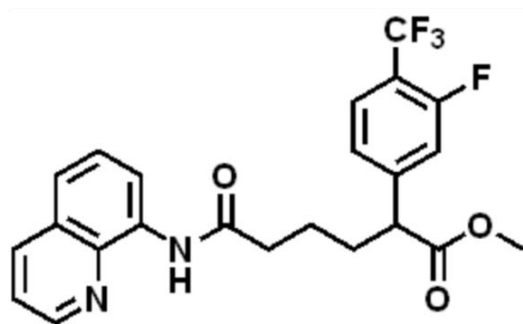

-61.15  
-61.18

-113.54  
-113.58  
-113.60  
-113.61  
-113.63  
-113.64  
-113.66  
-113.69

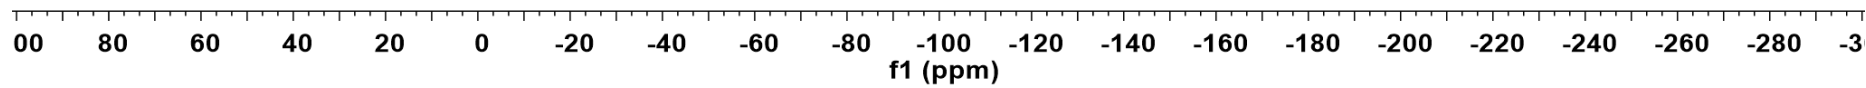

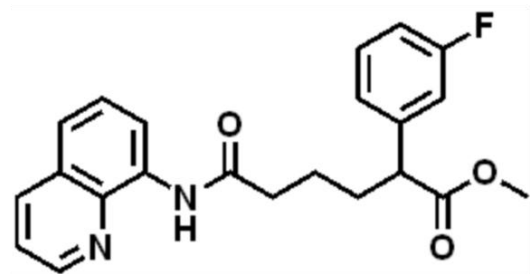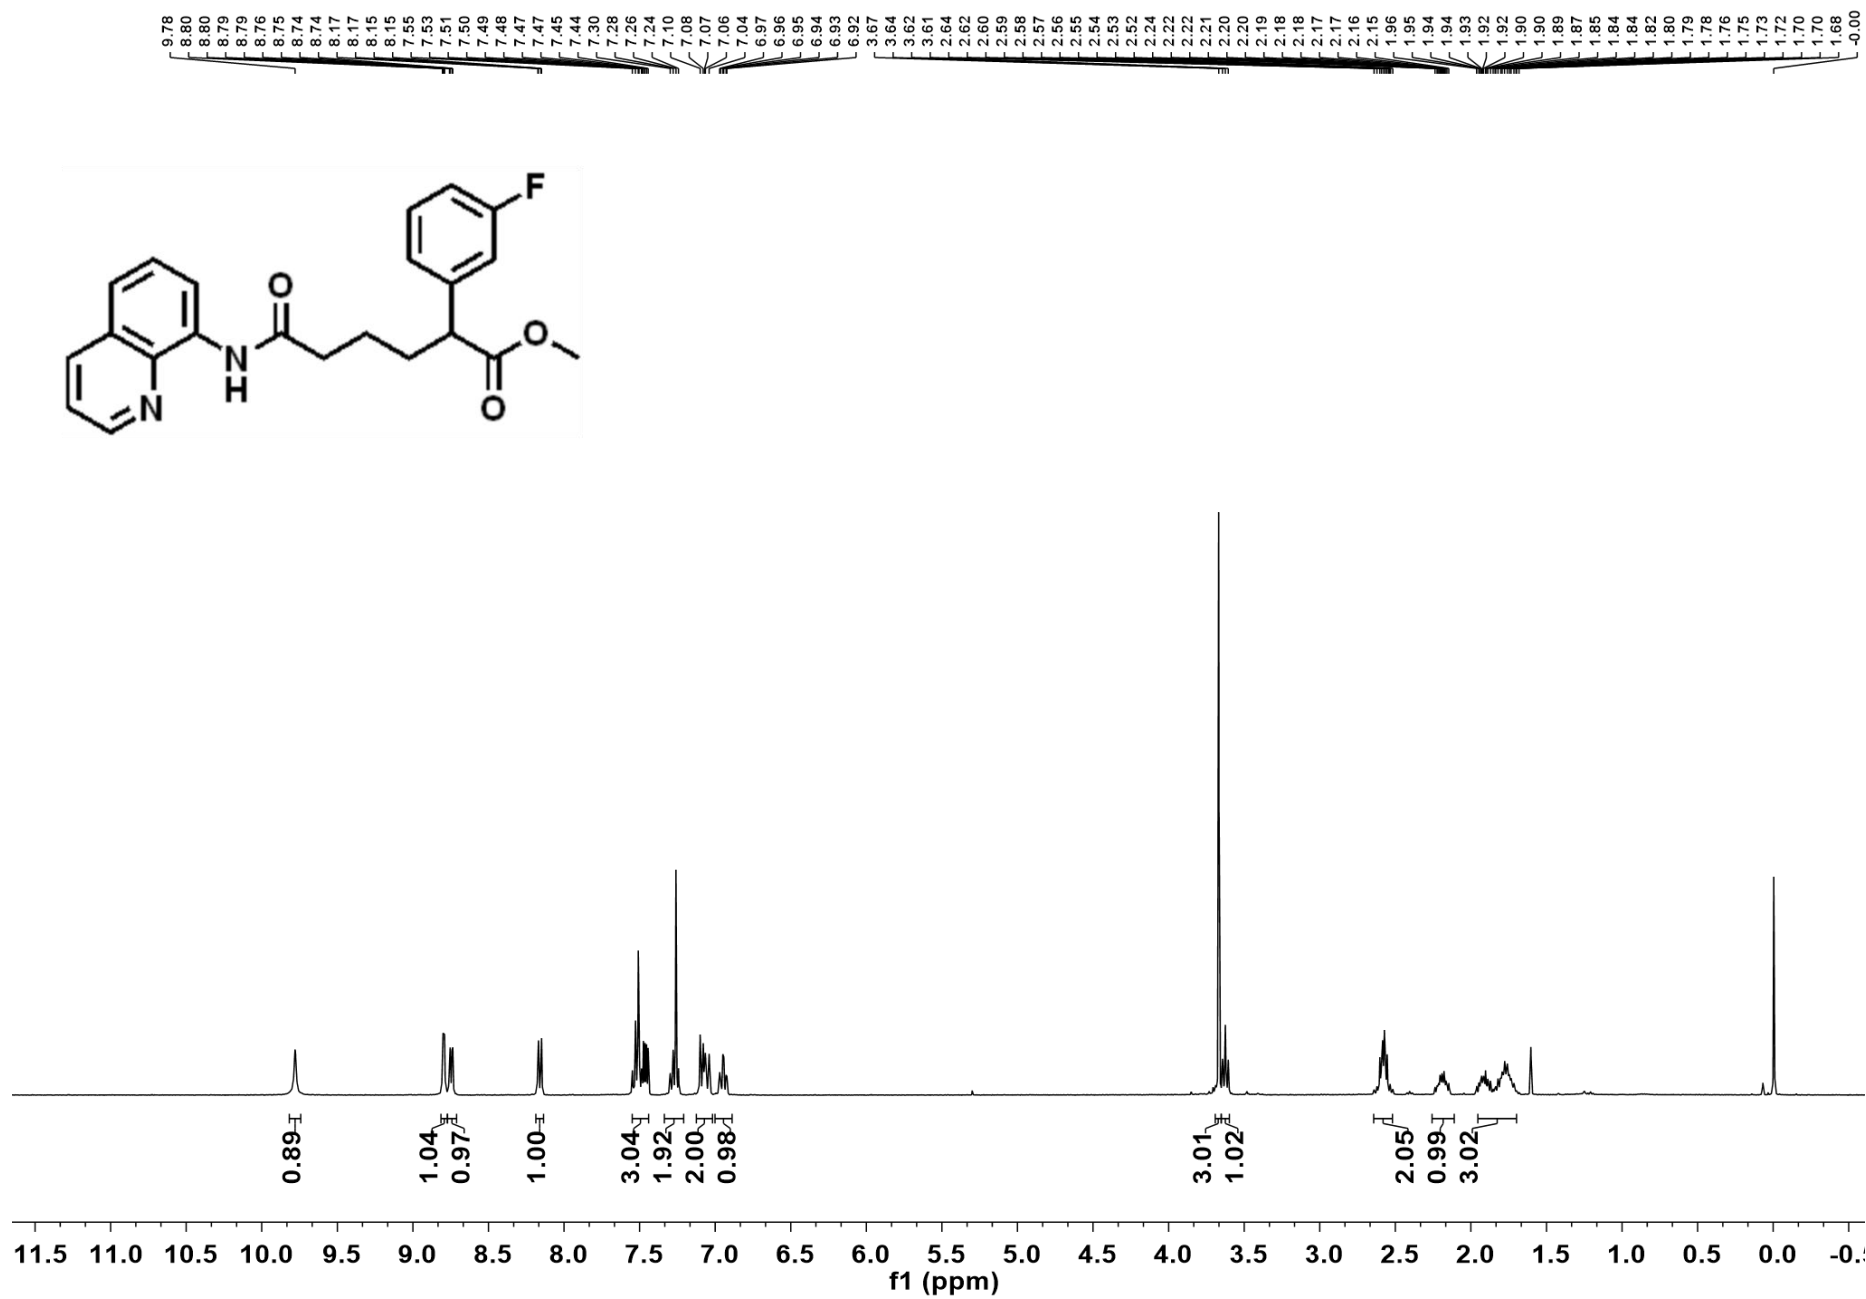

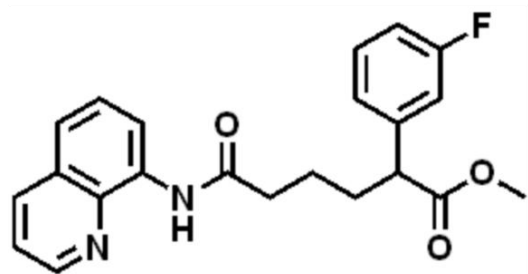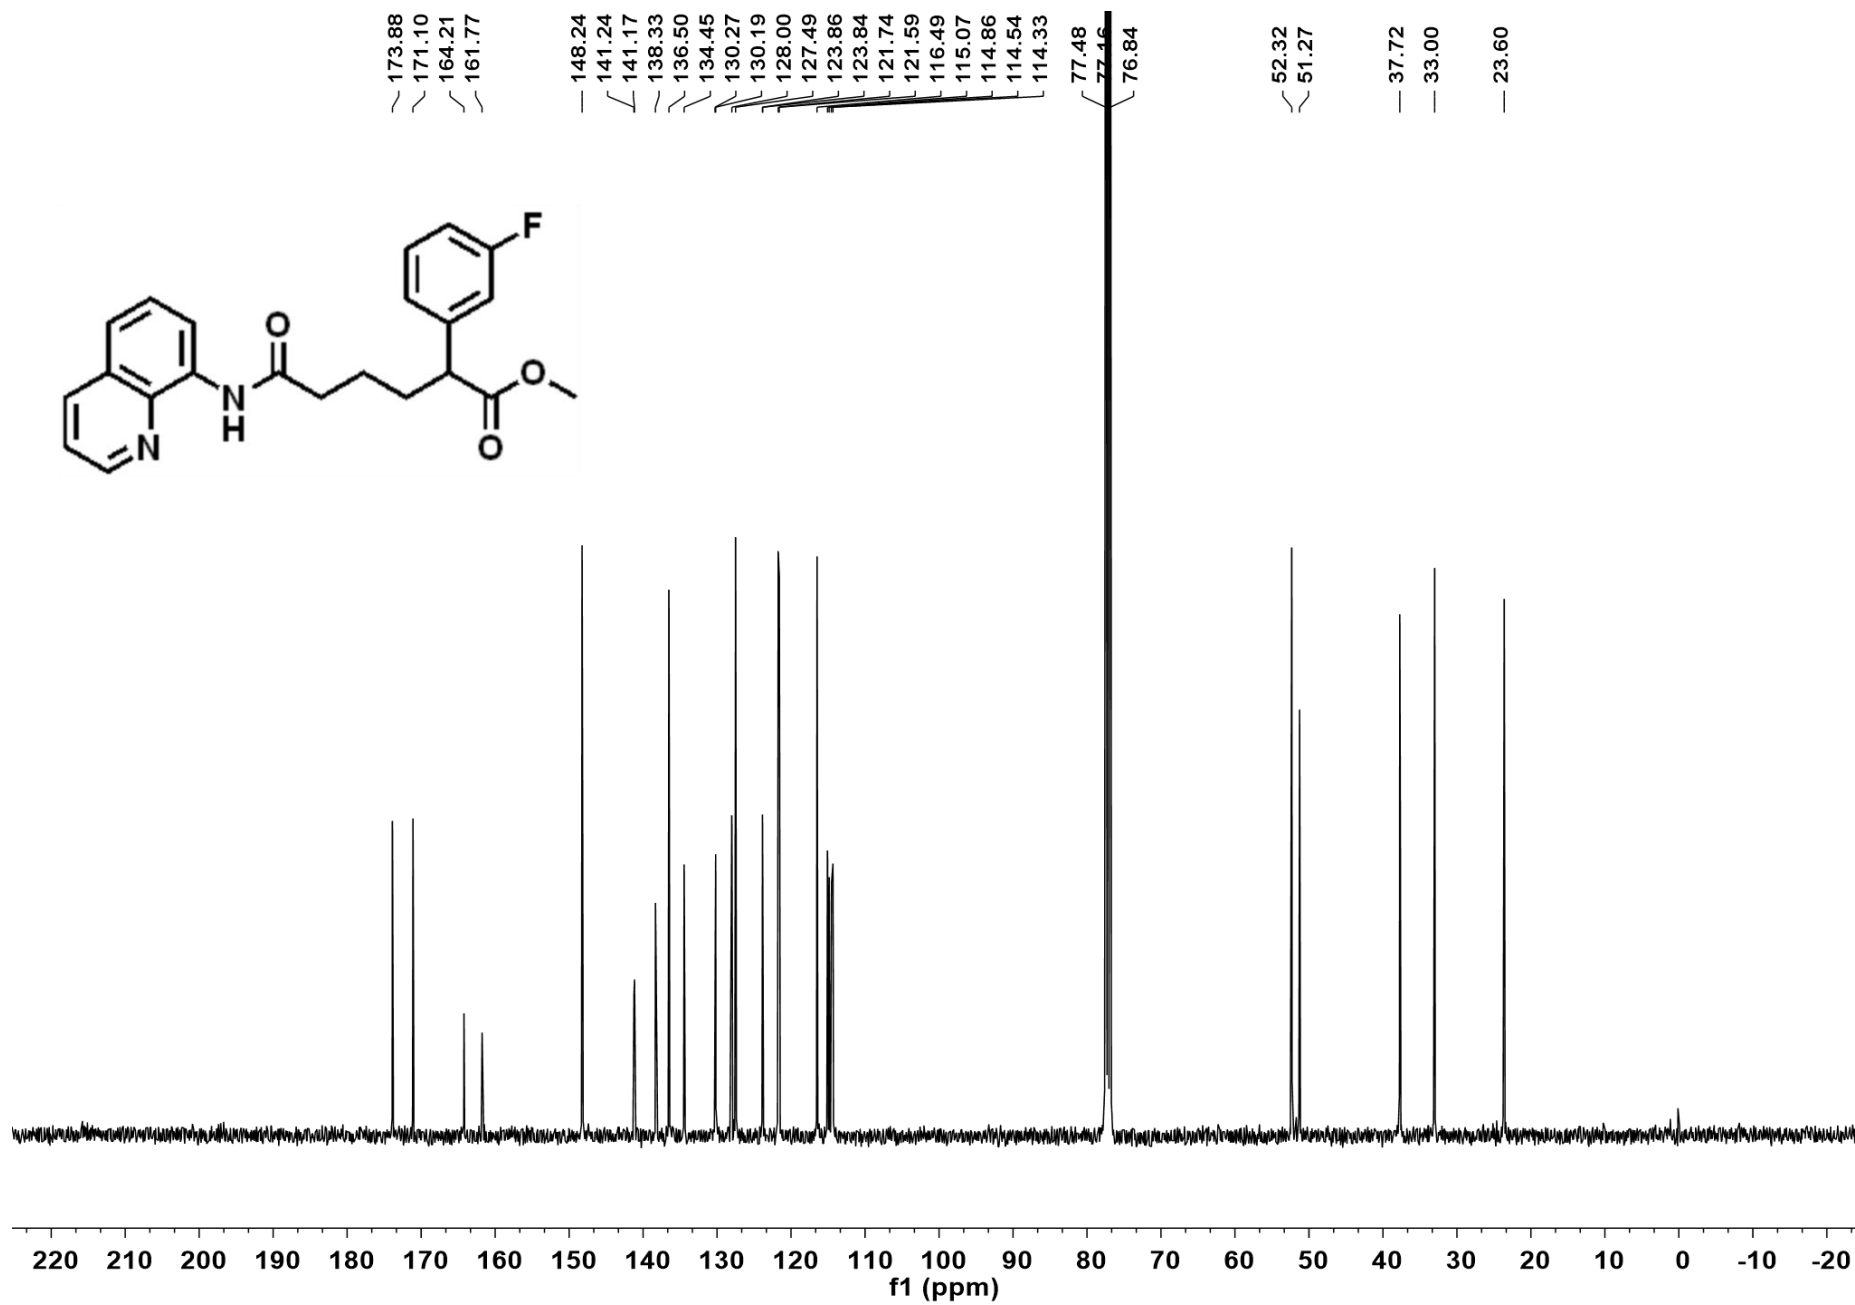



-112.55  
-112.56  
-112.57  
-112.59  
-112.60  
-112.61

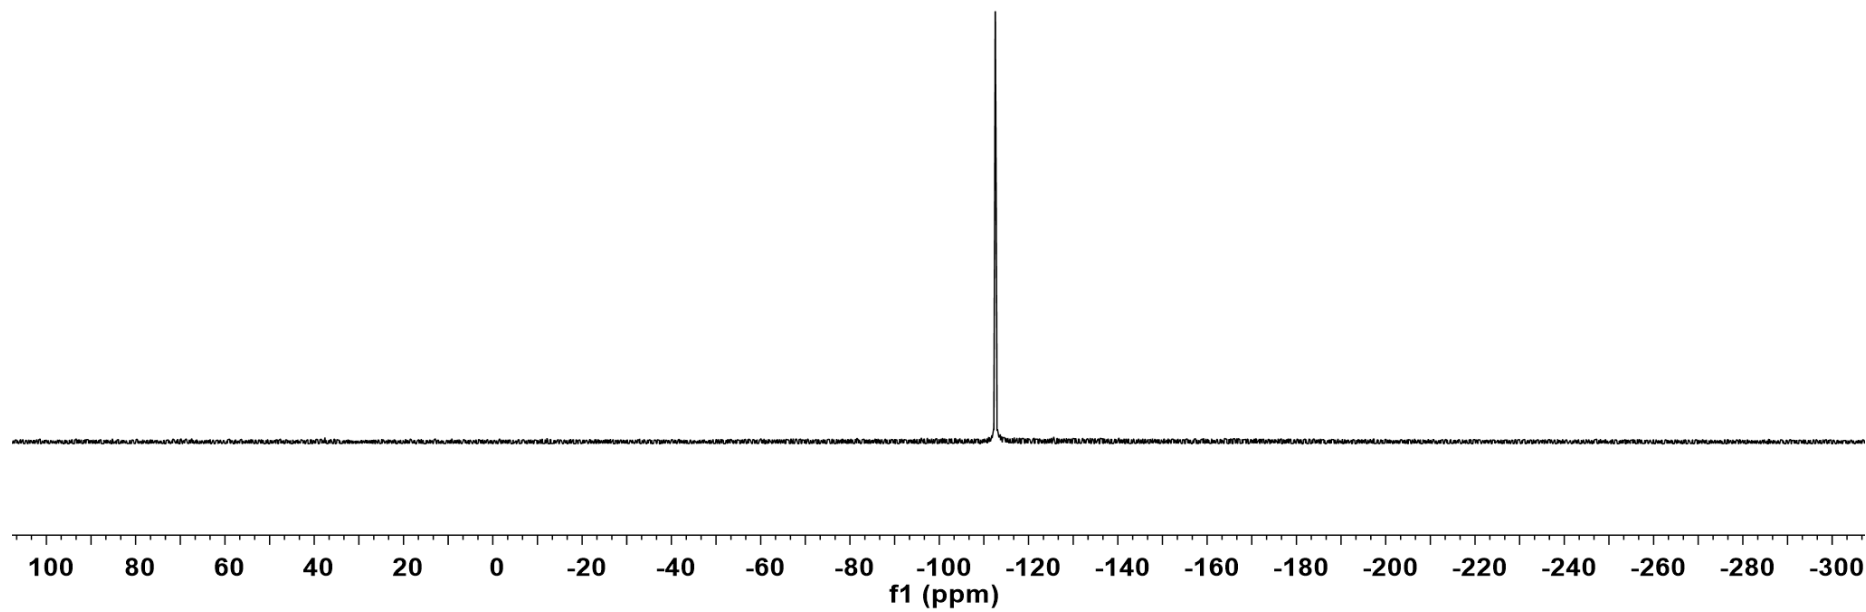

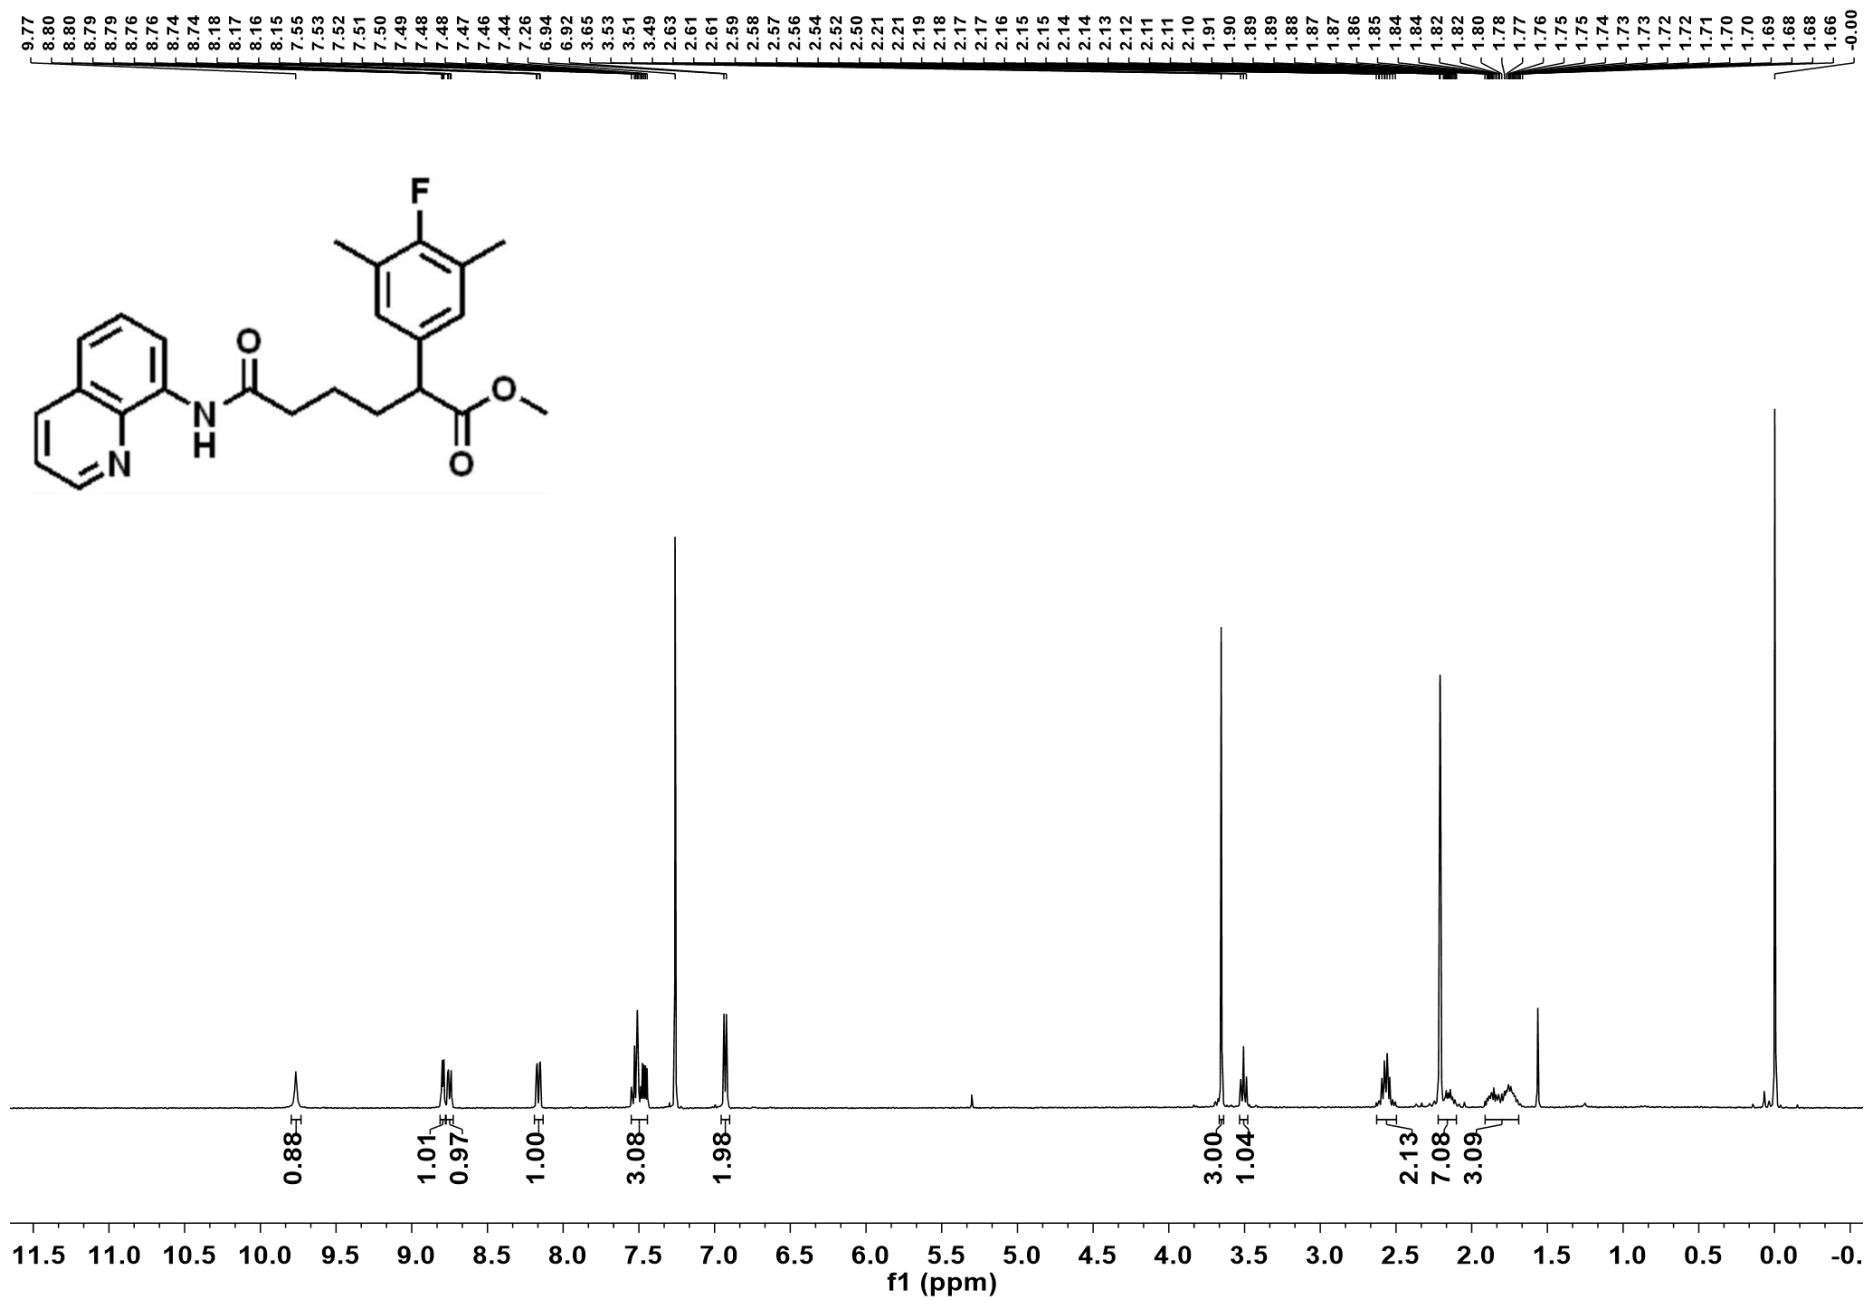

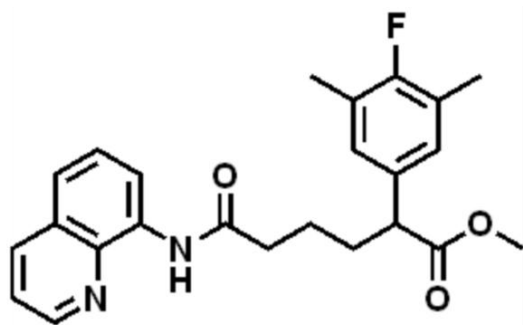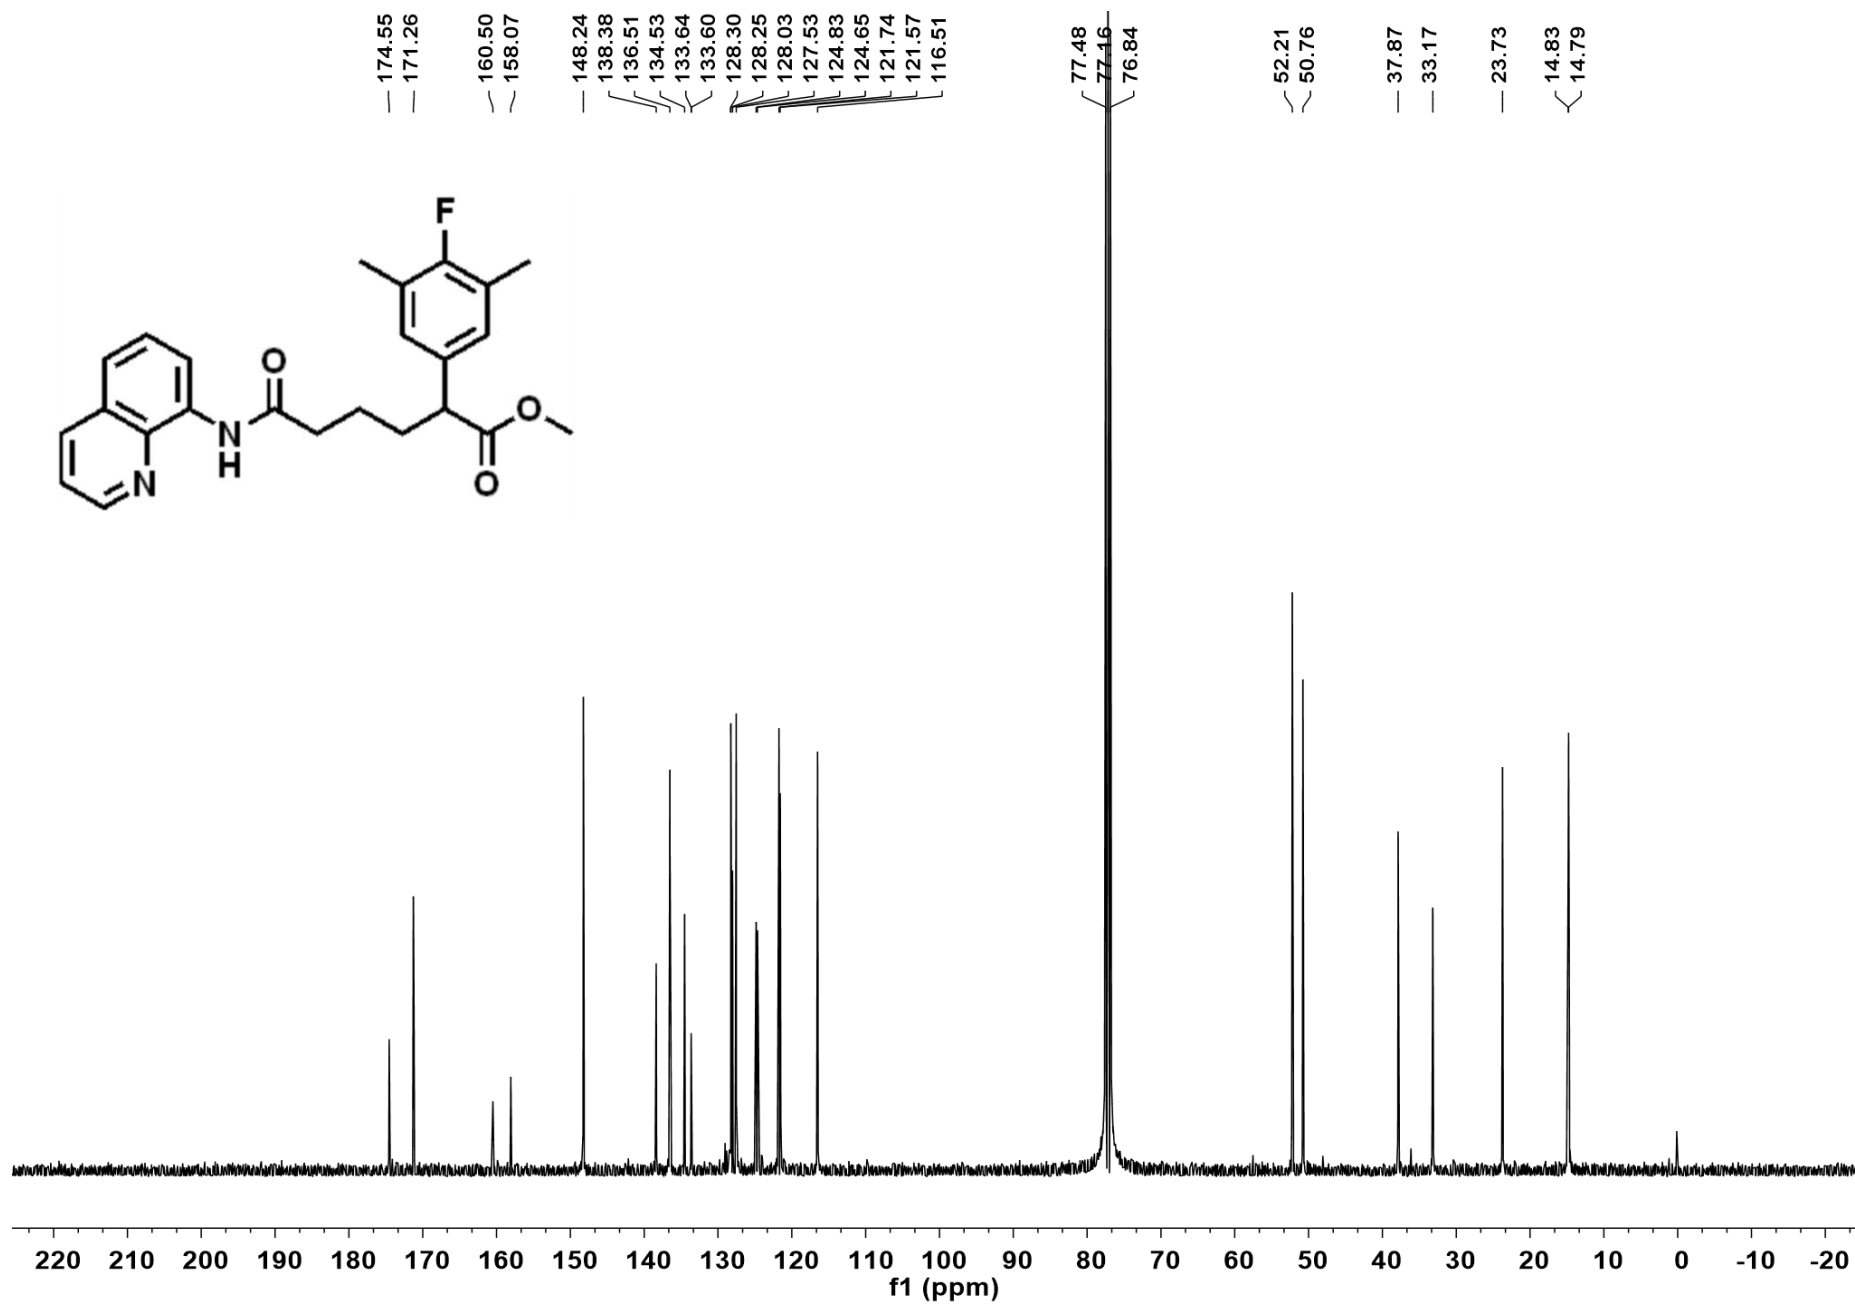



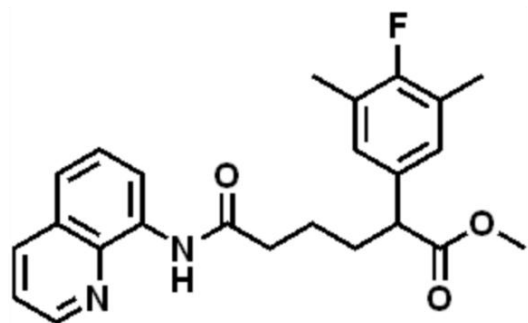

— -123.70

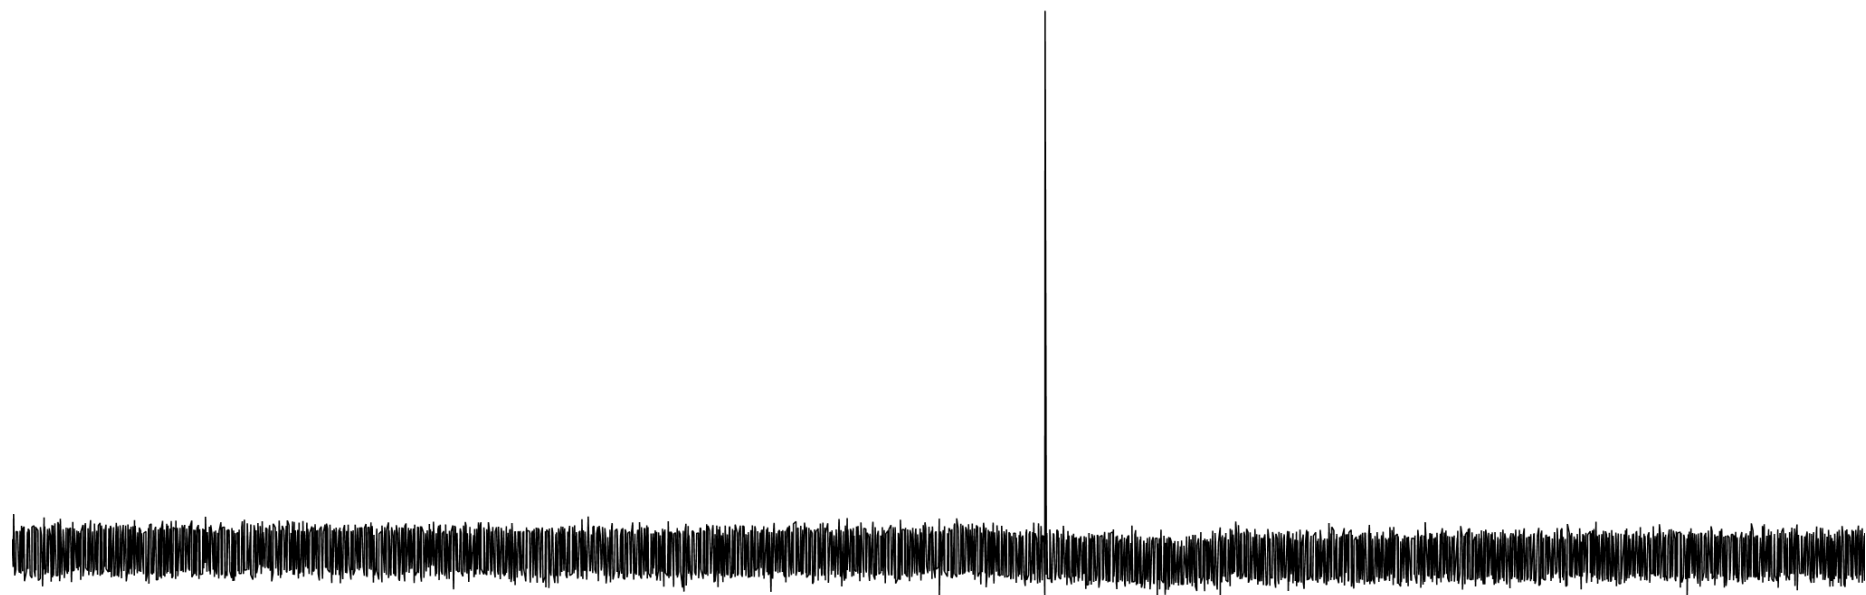

100 80 60 40 20 0 -20 -40 -60 -80 -100 -120 -140 -160 -180 -200 -220 -240 -260 -280 -300  
f1 (ppm)

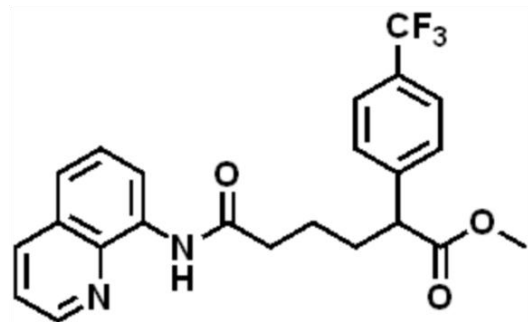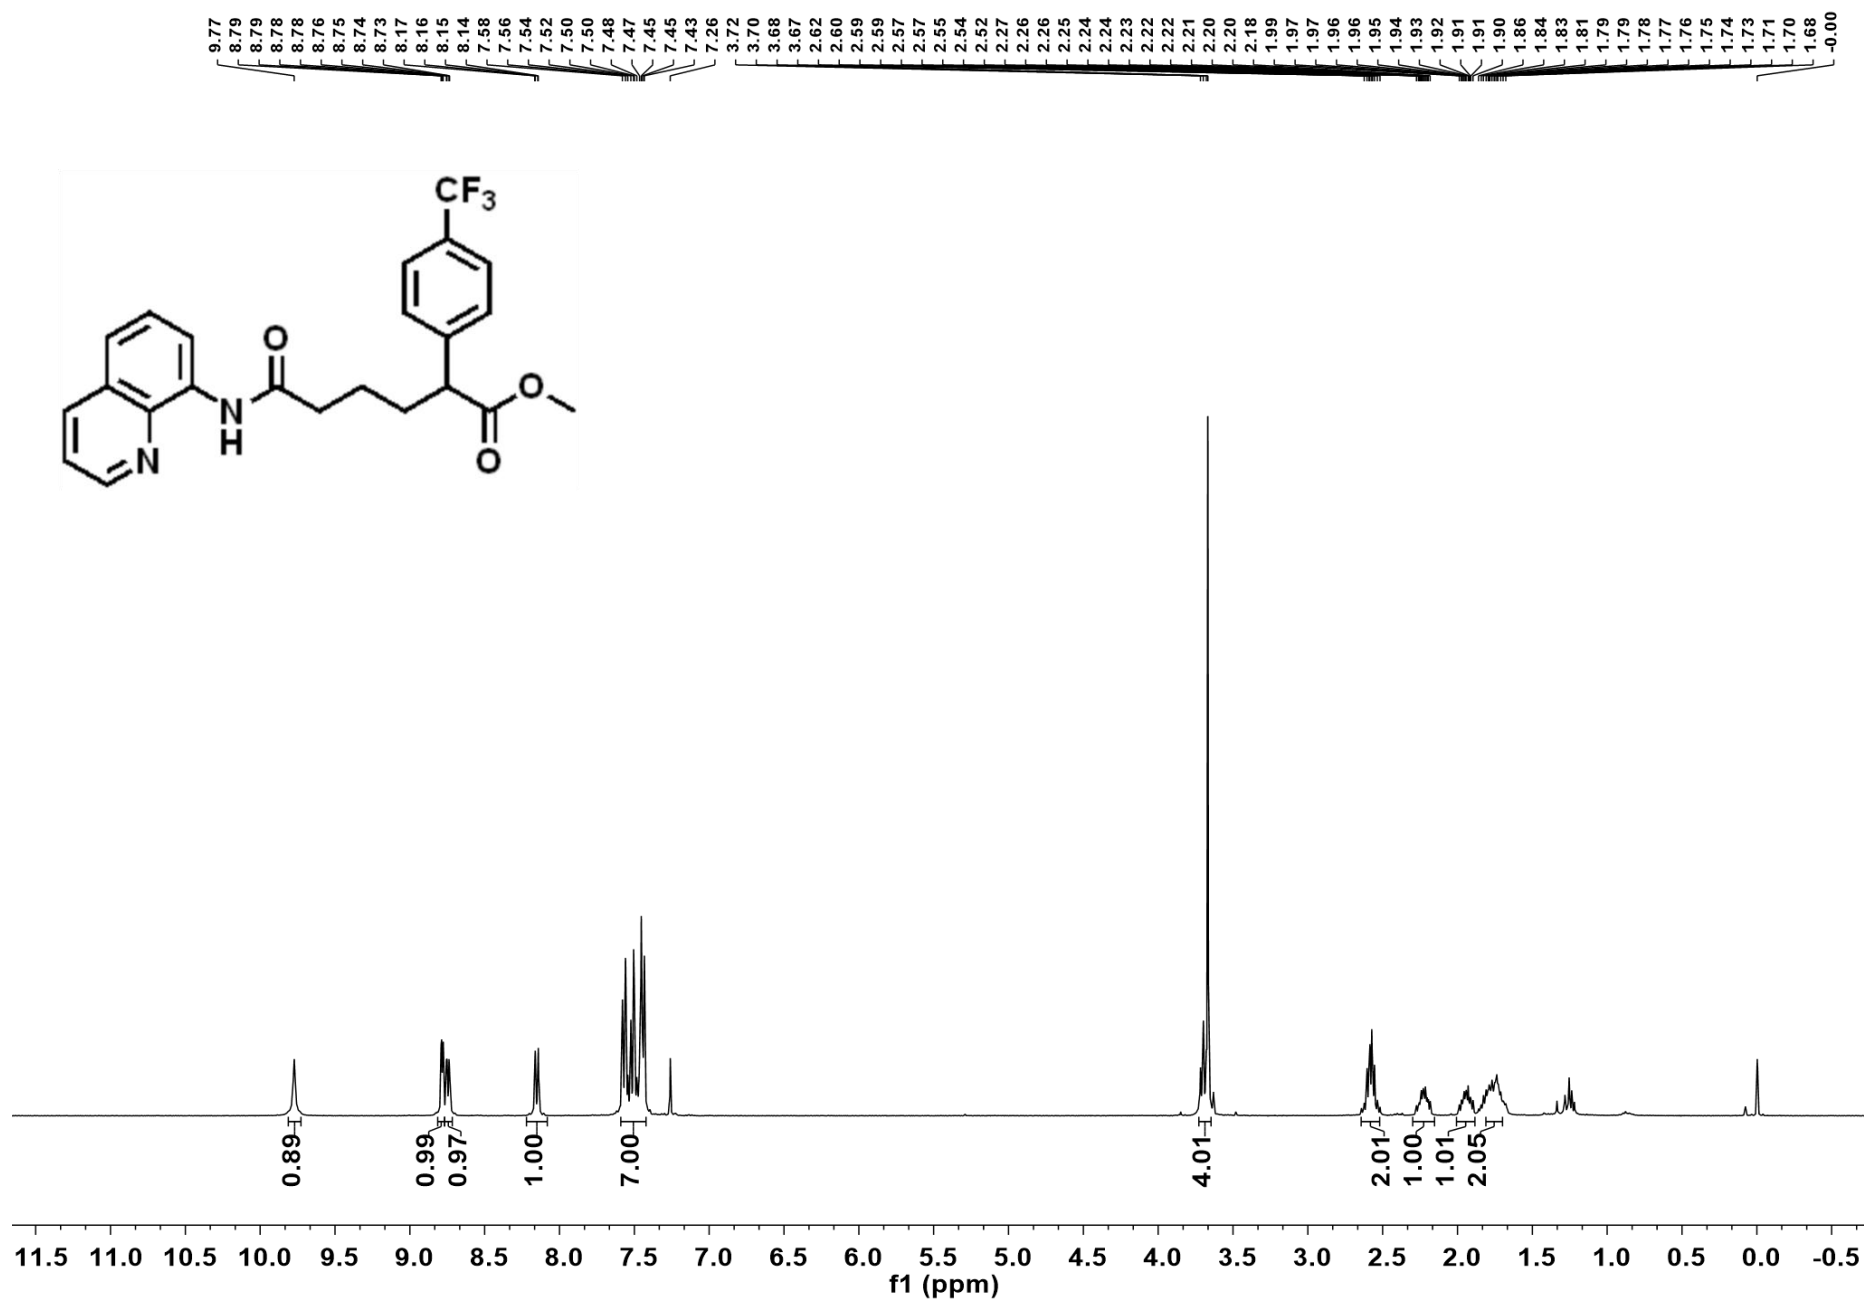

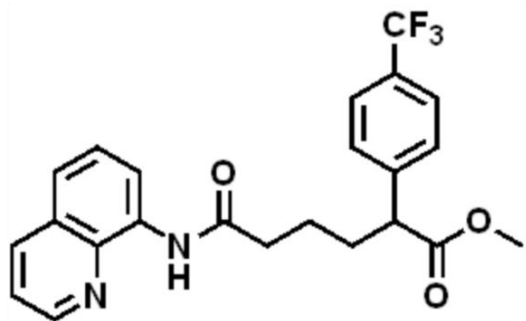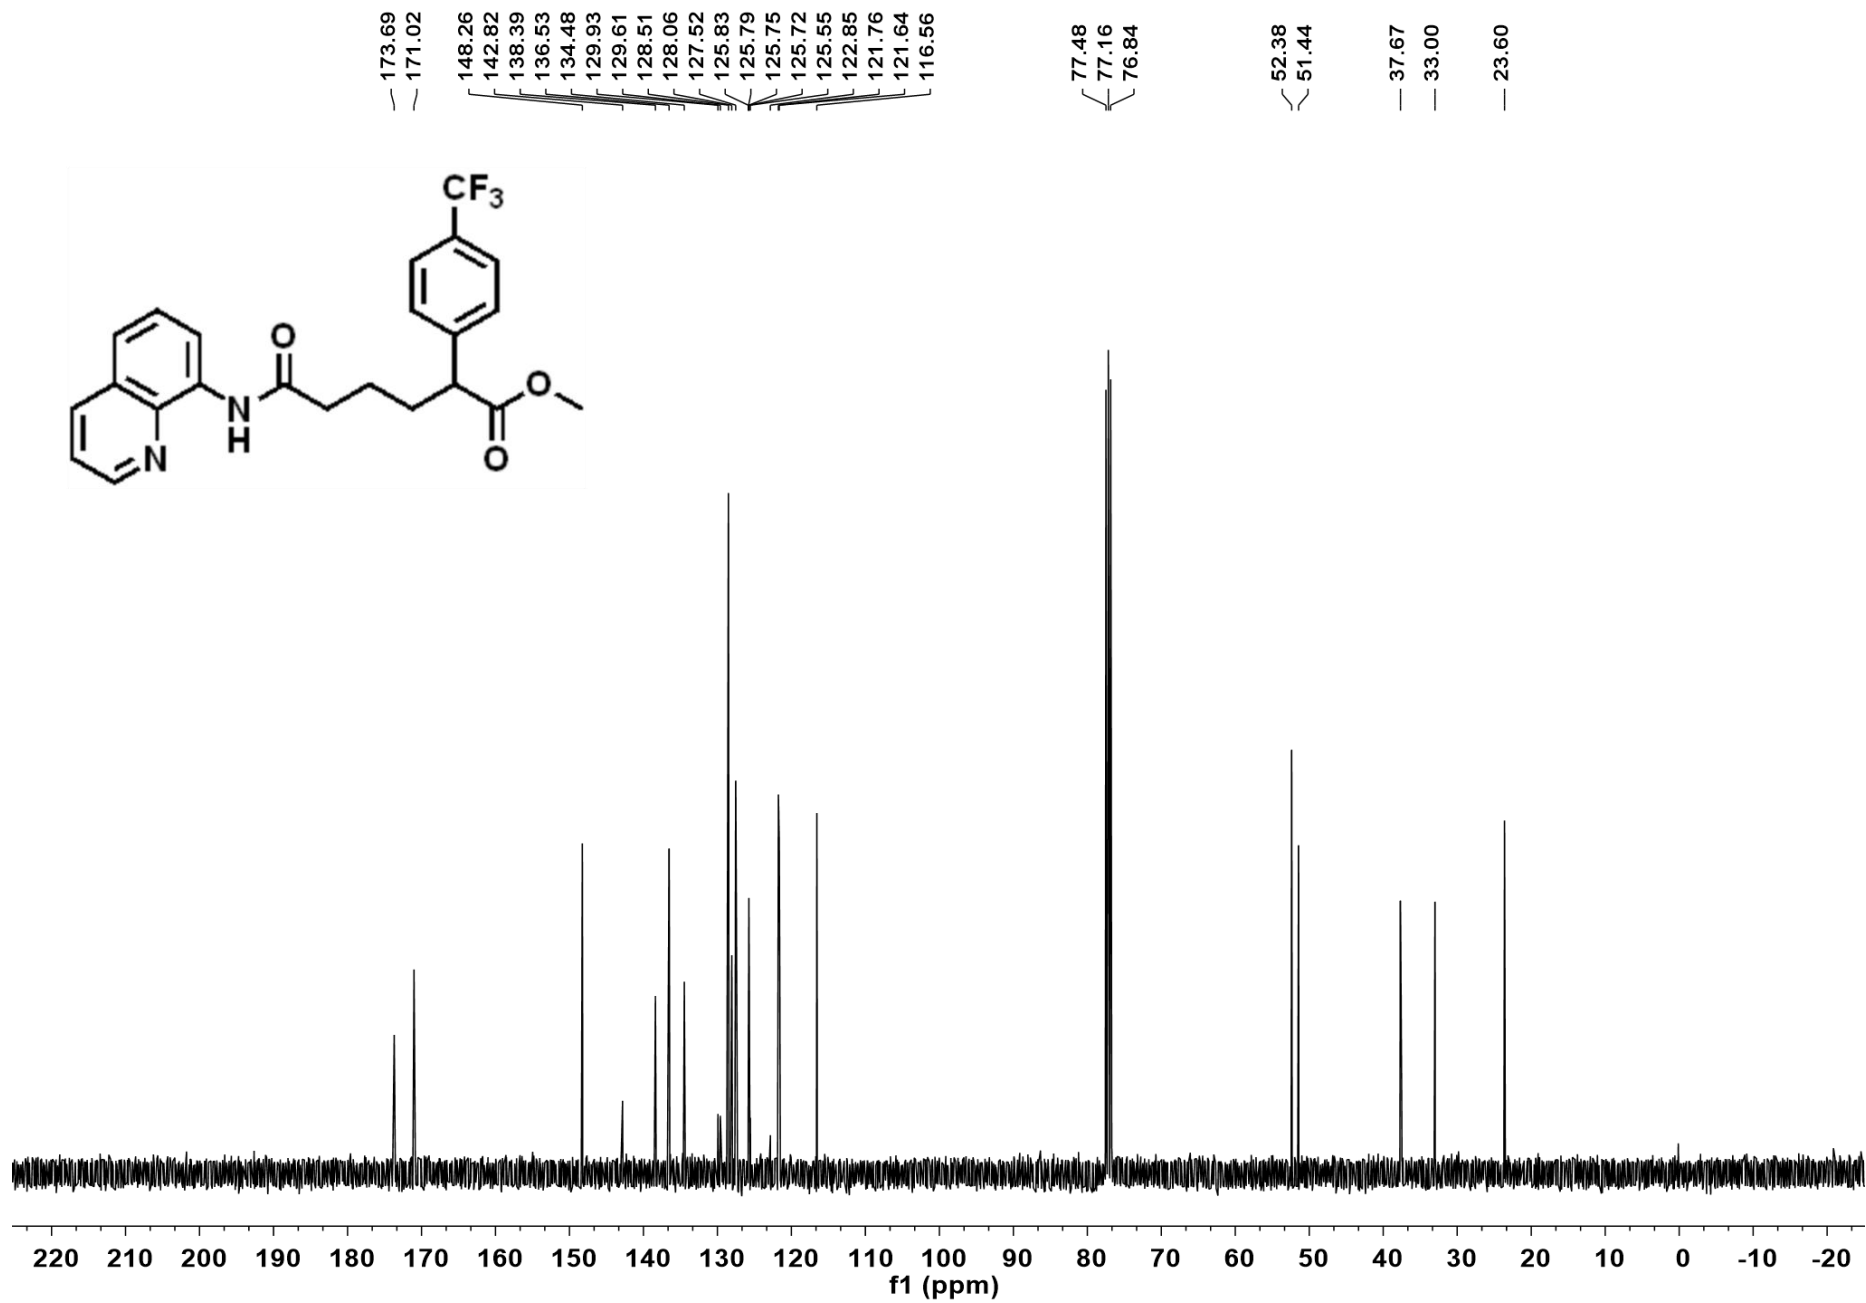

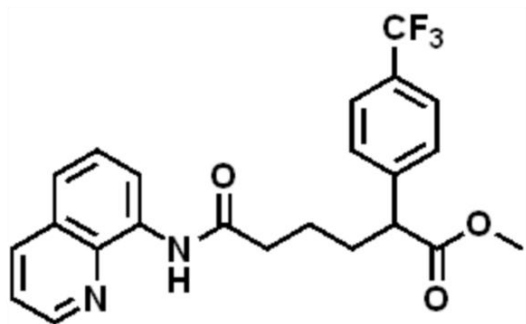

— -62.57

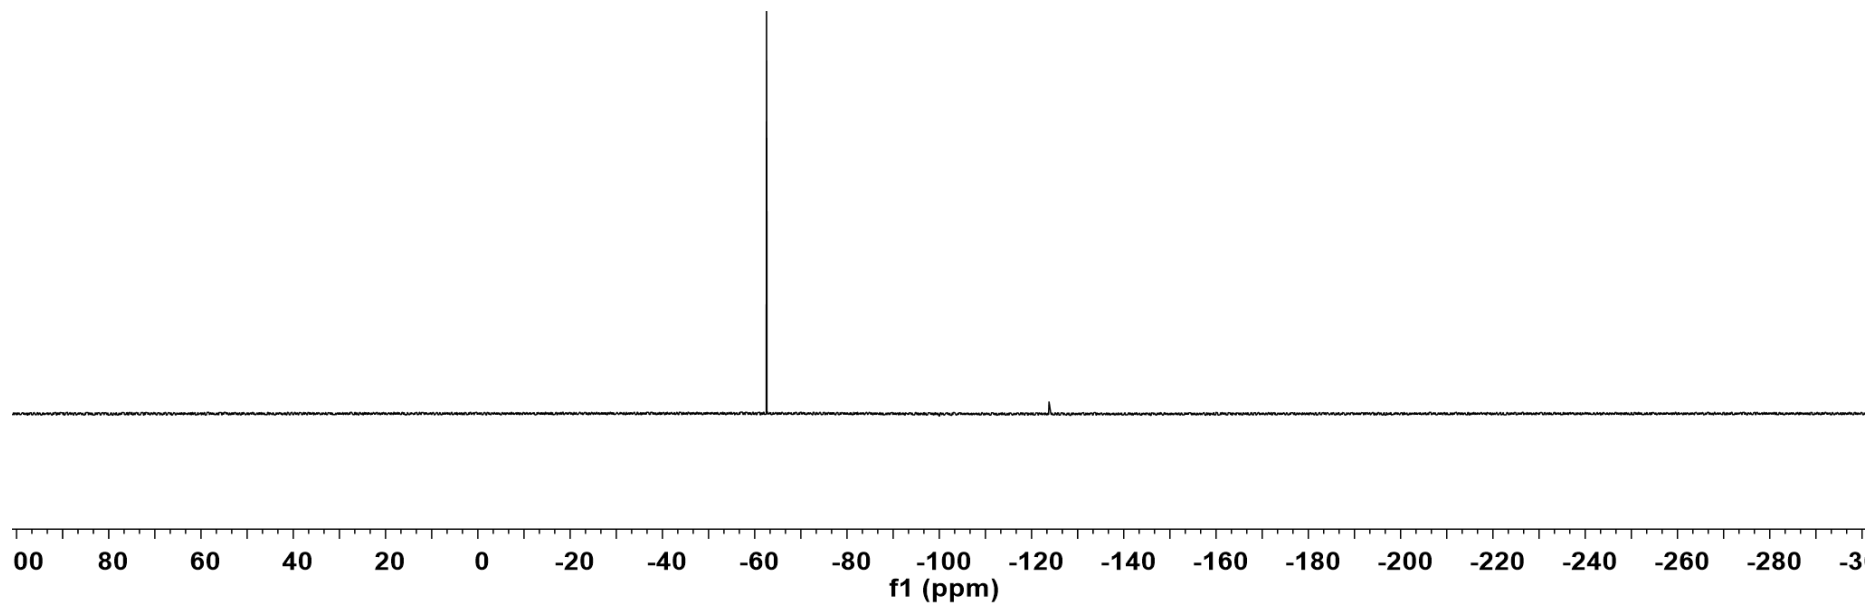

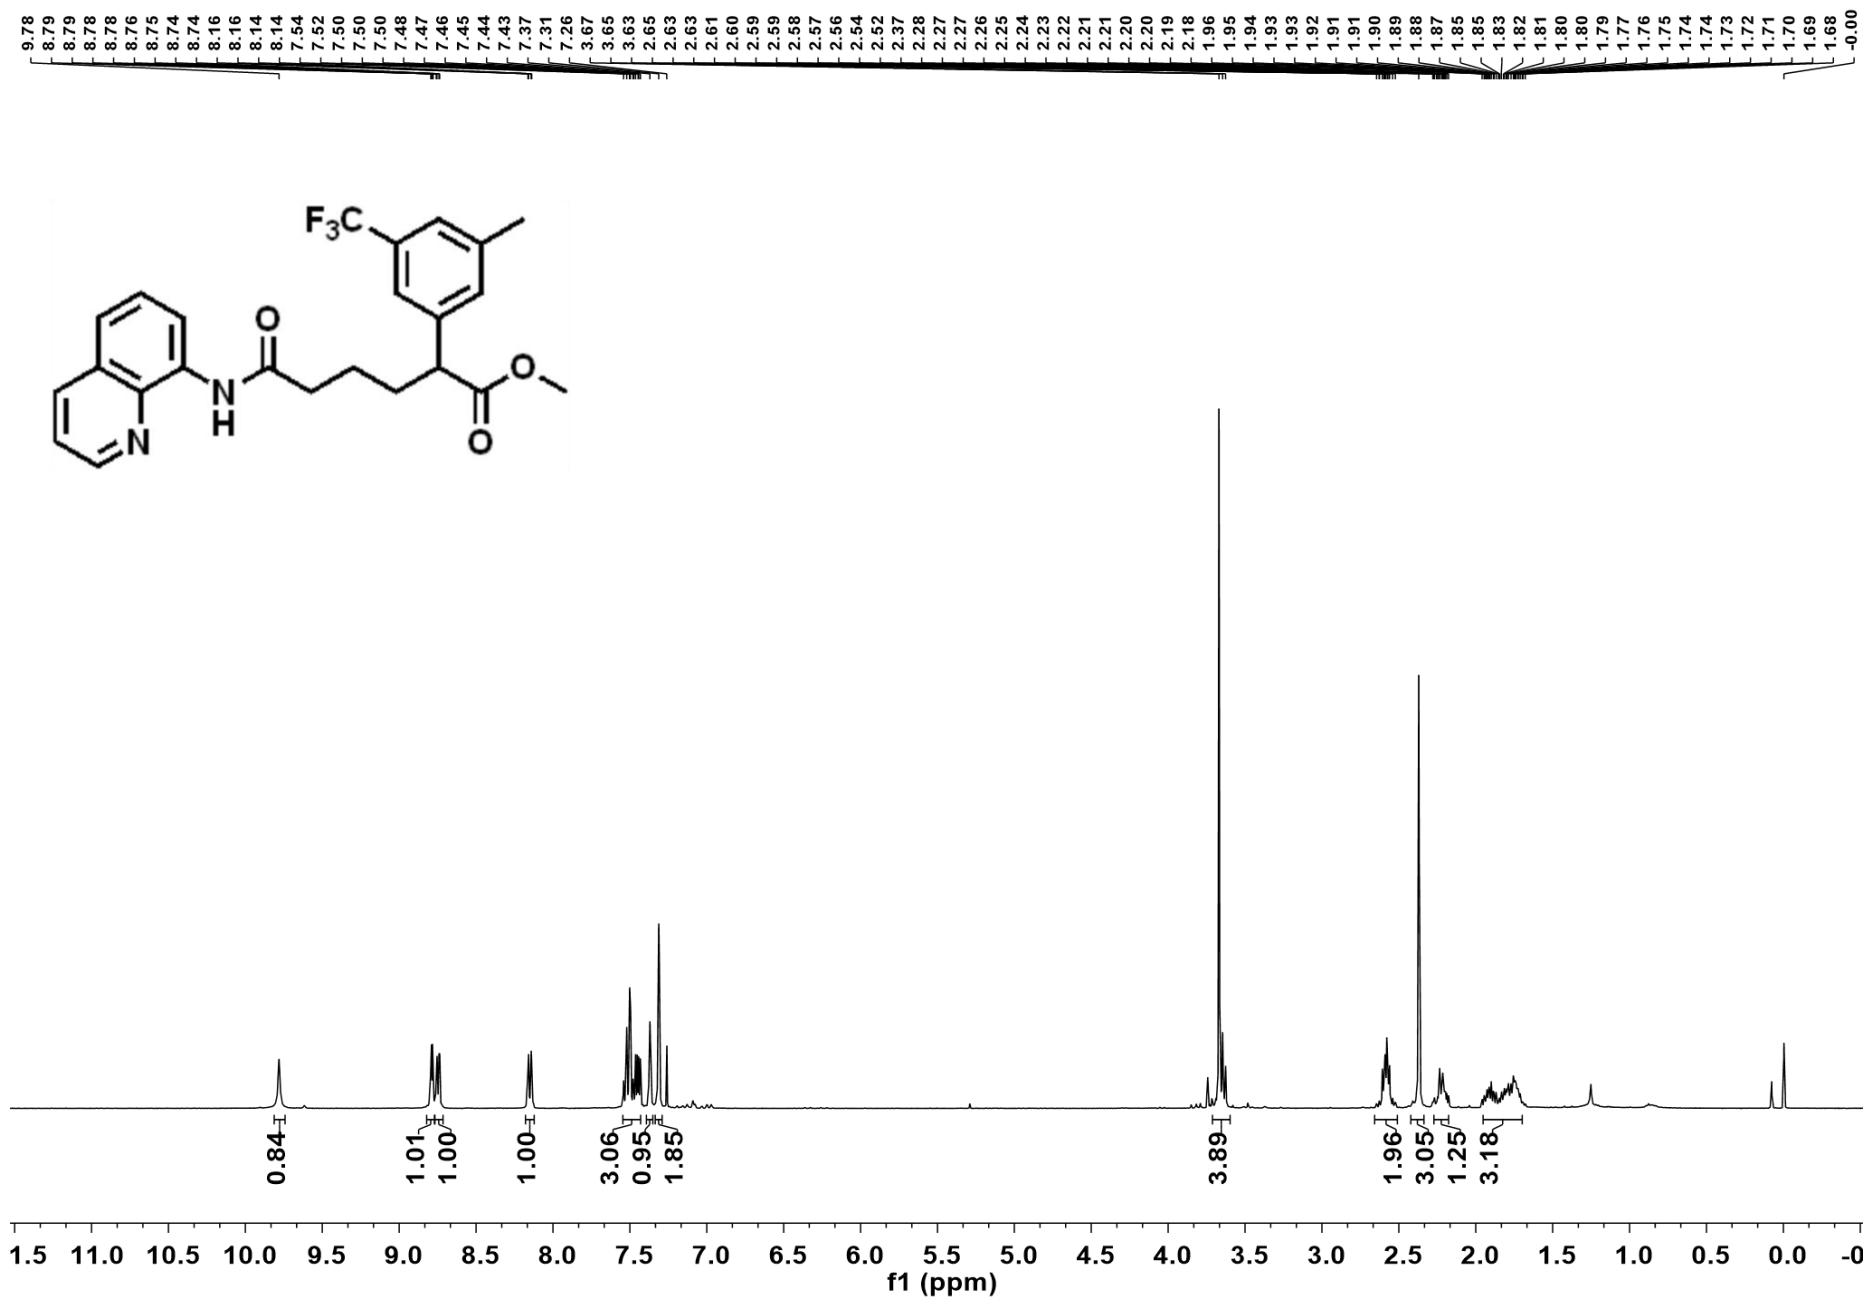

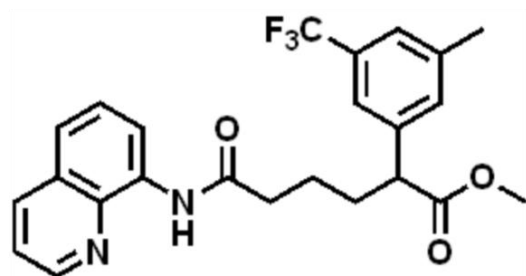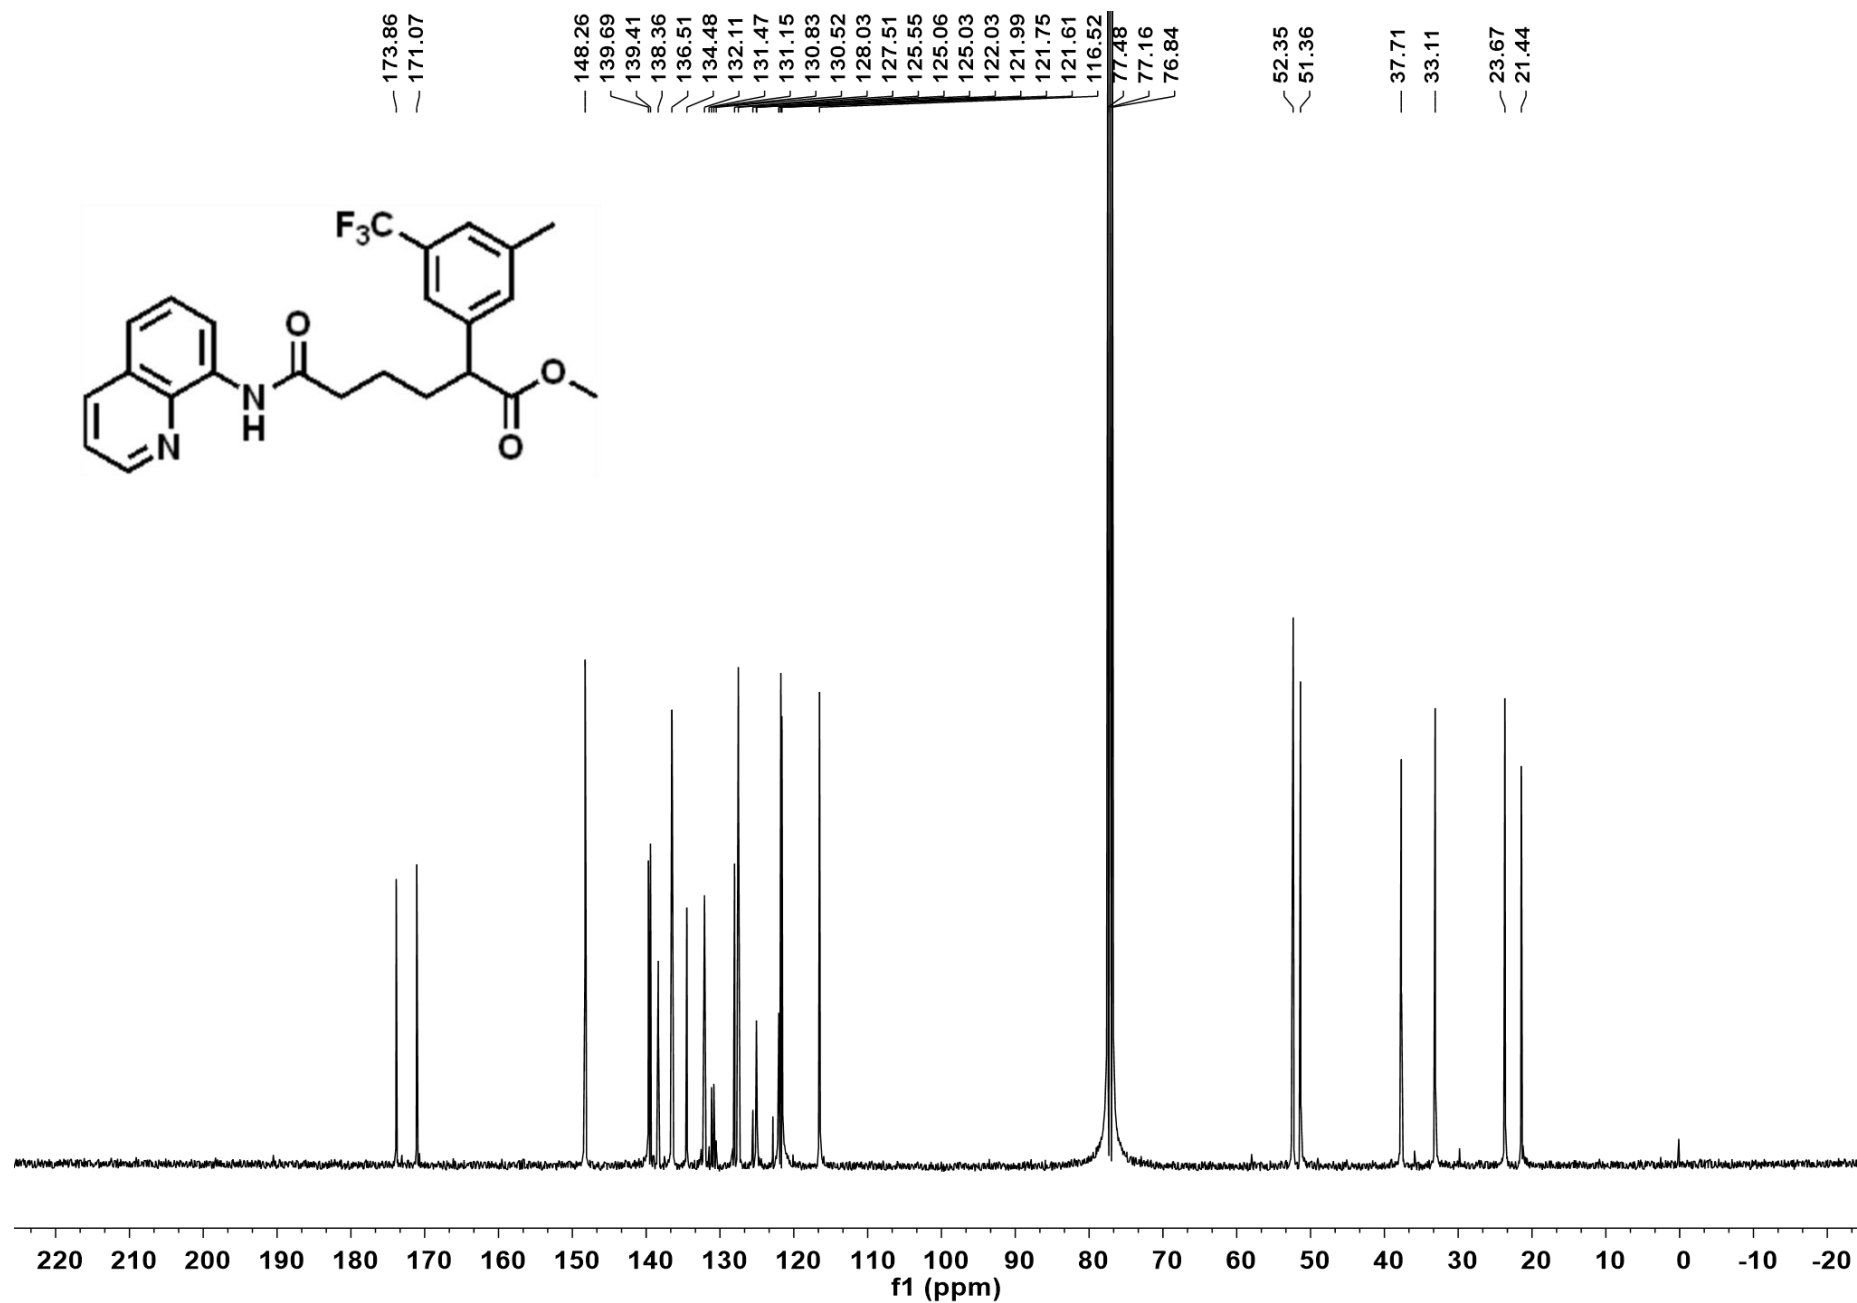

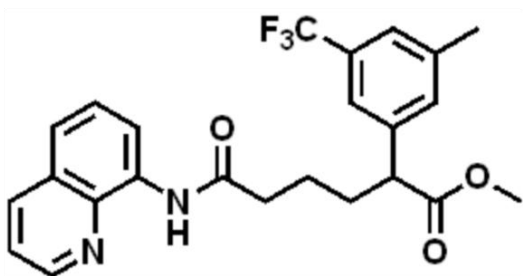

— -62.32

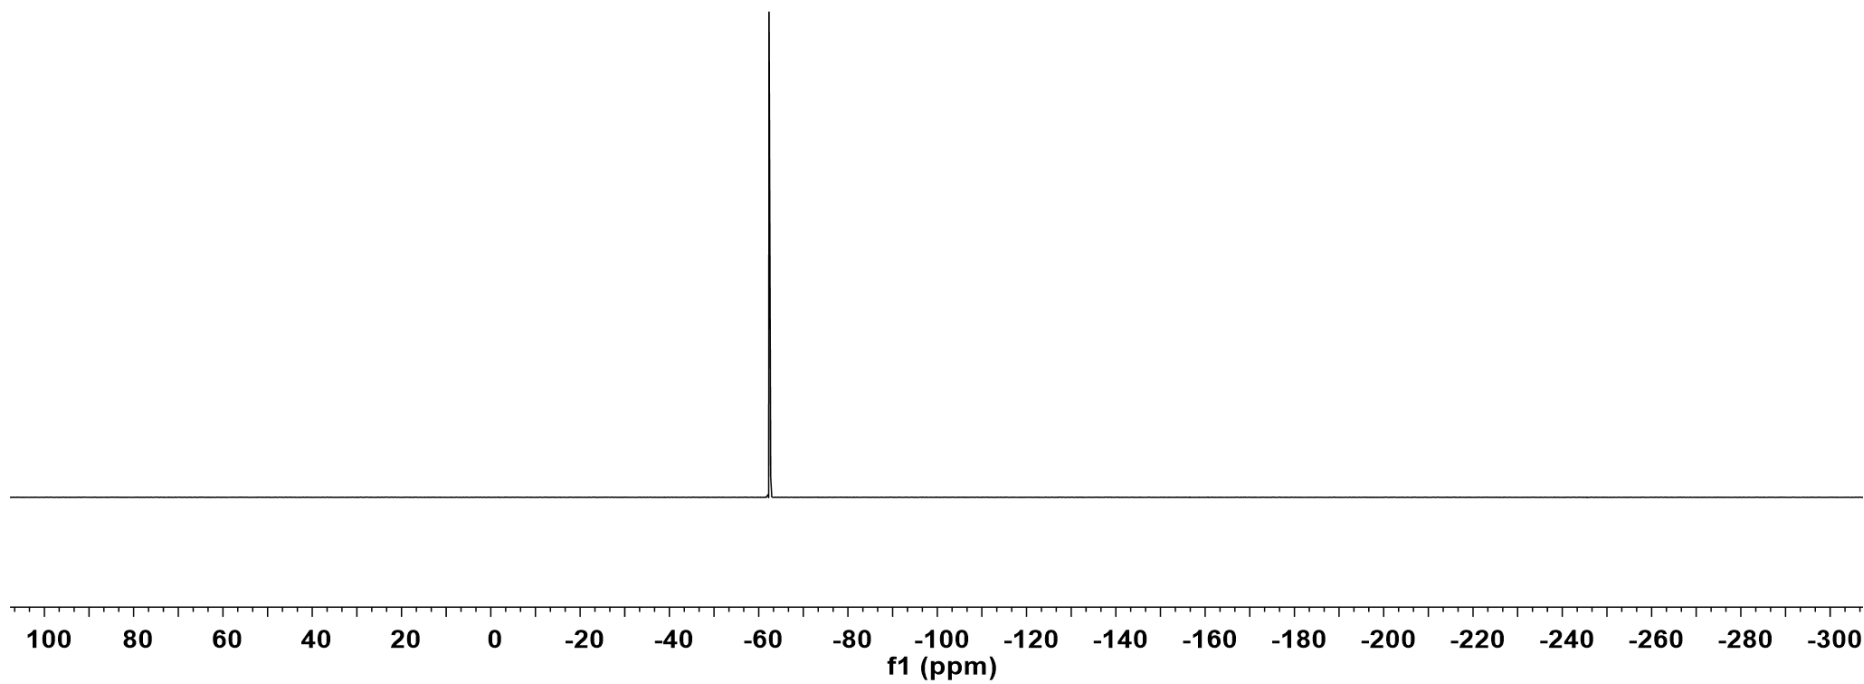

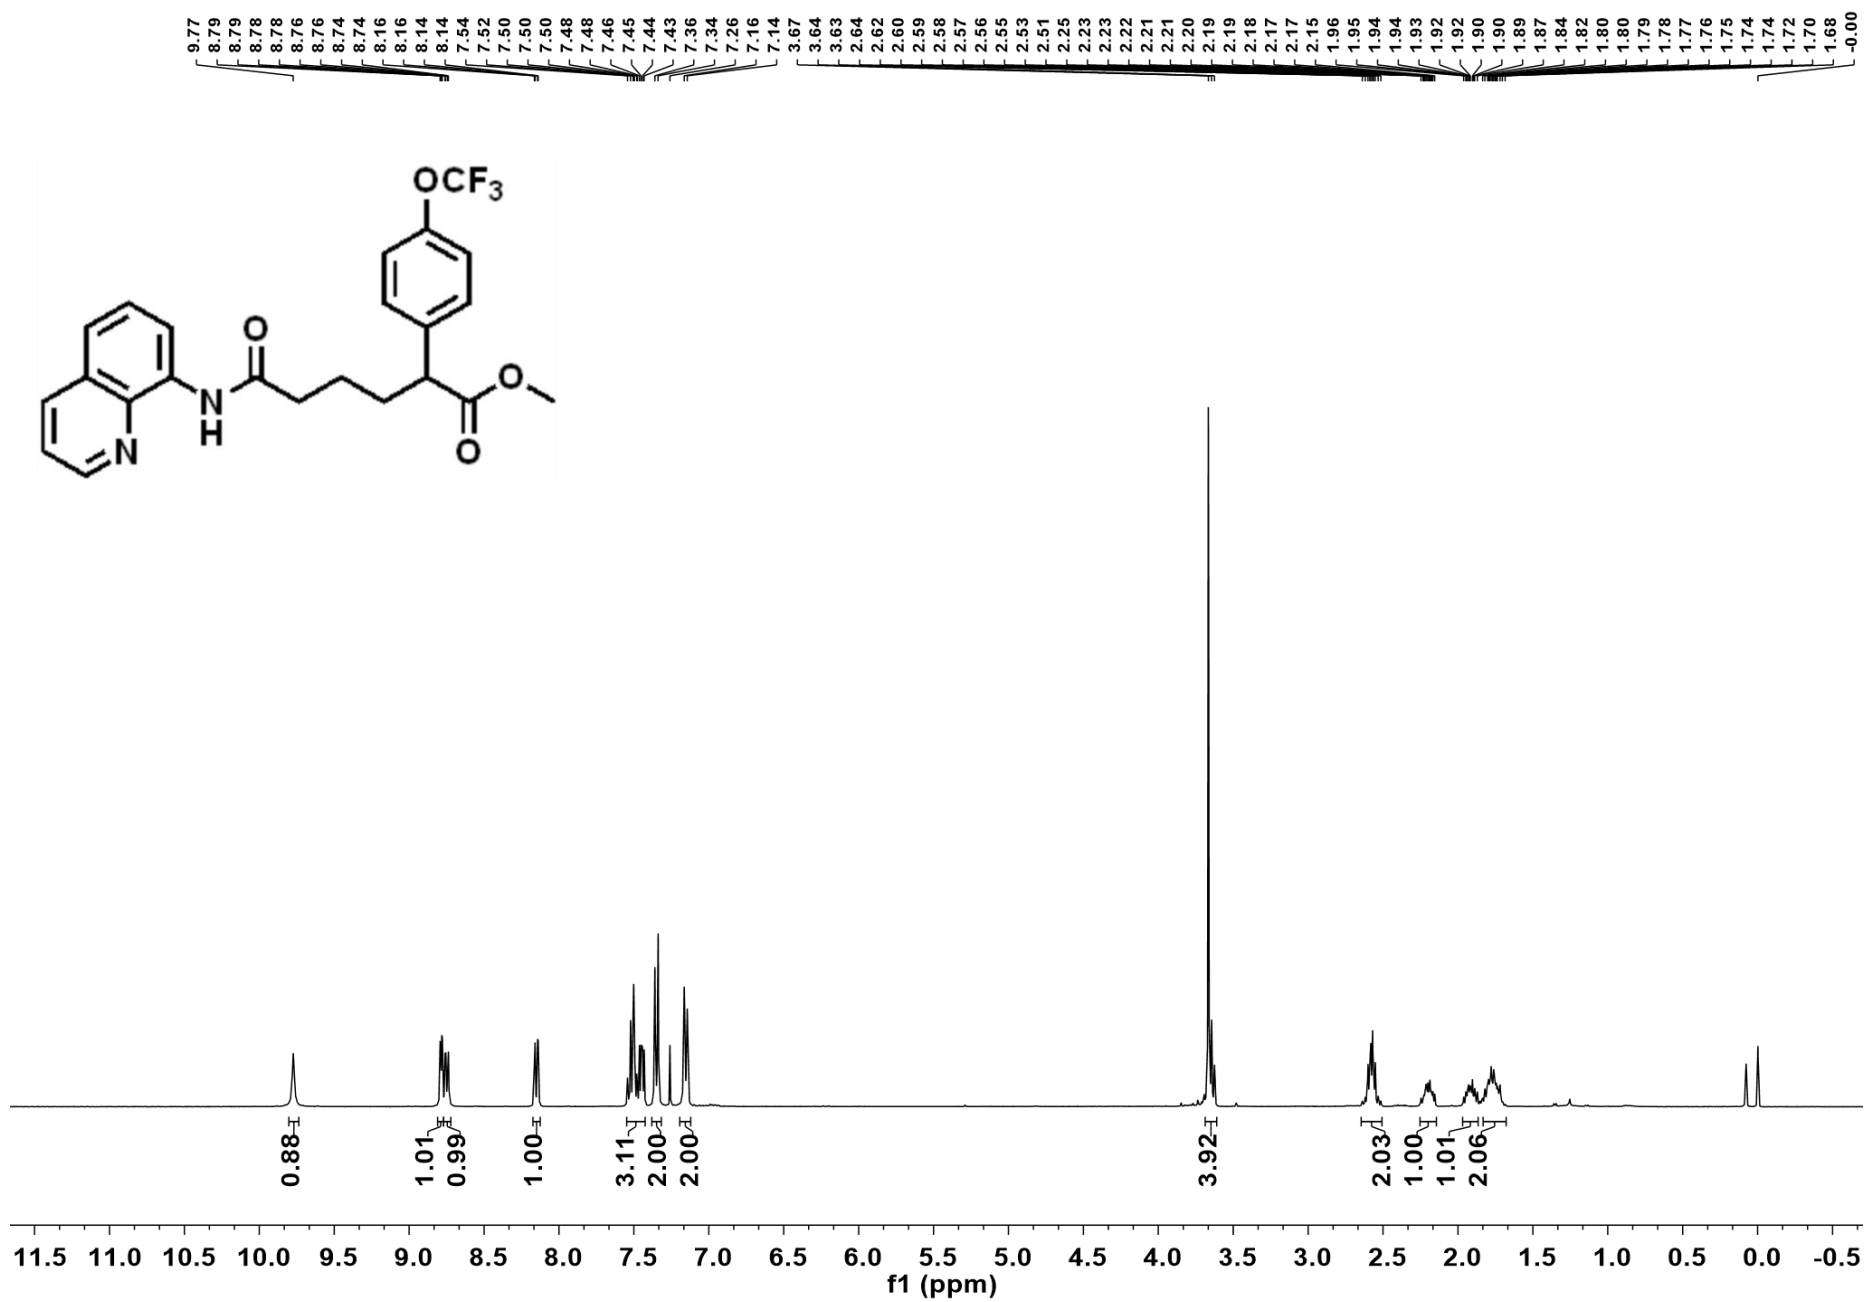



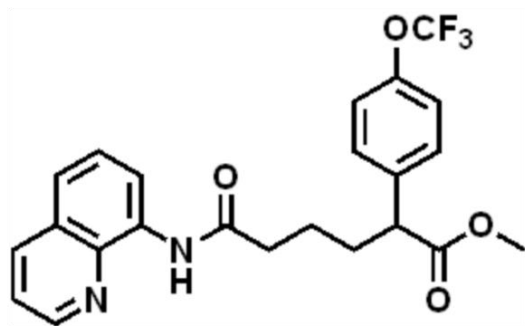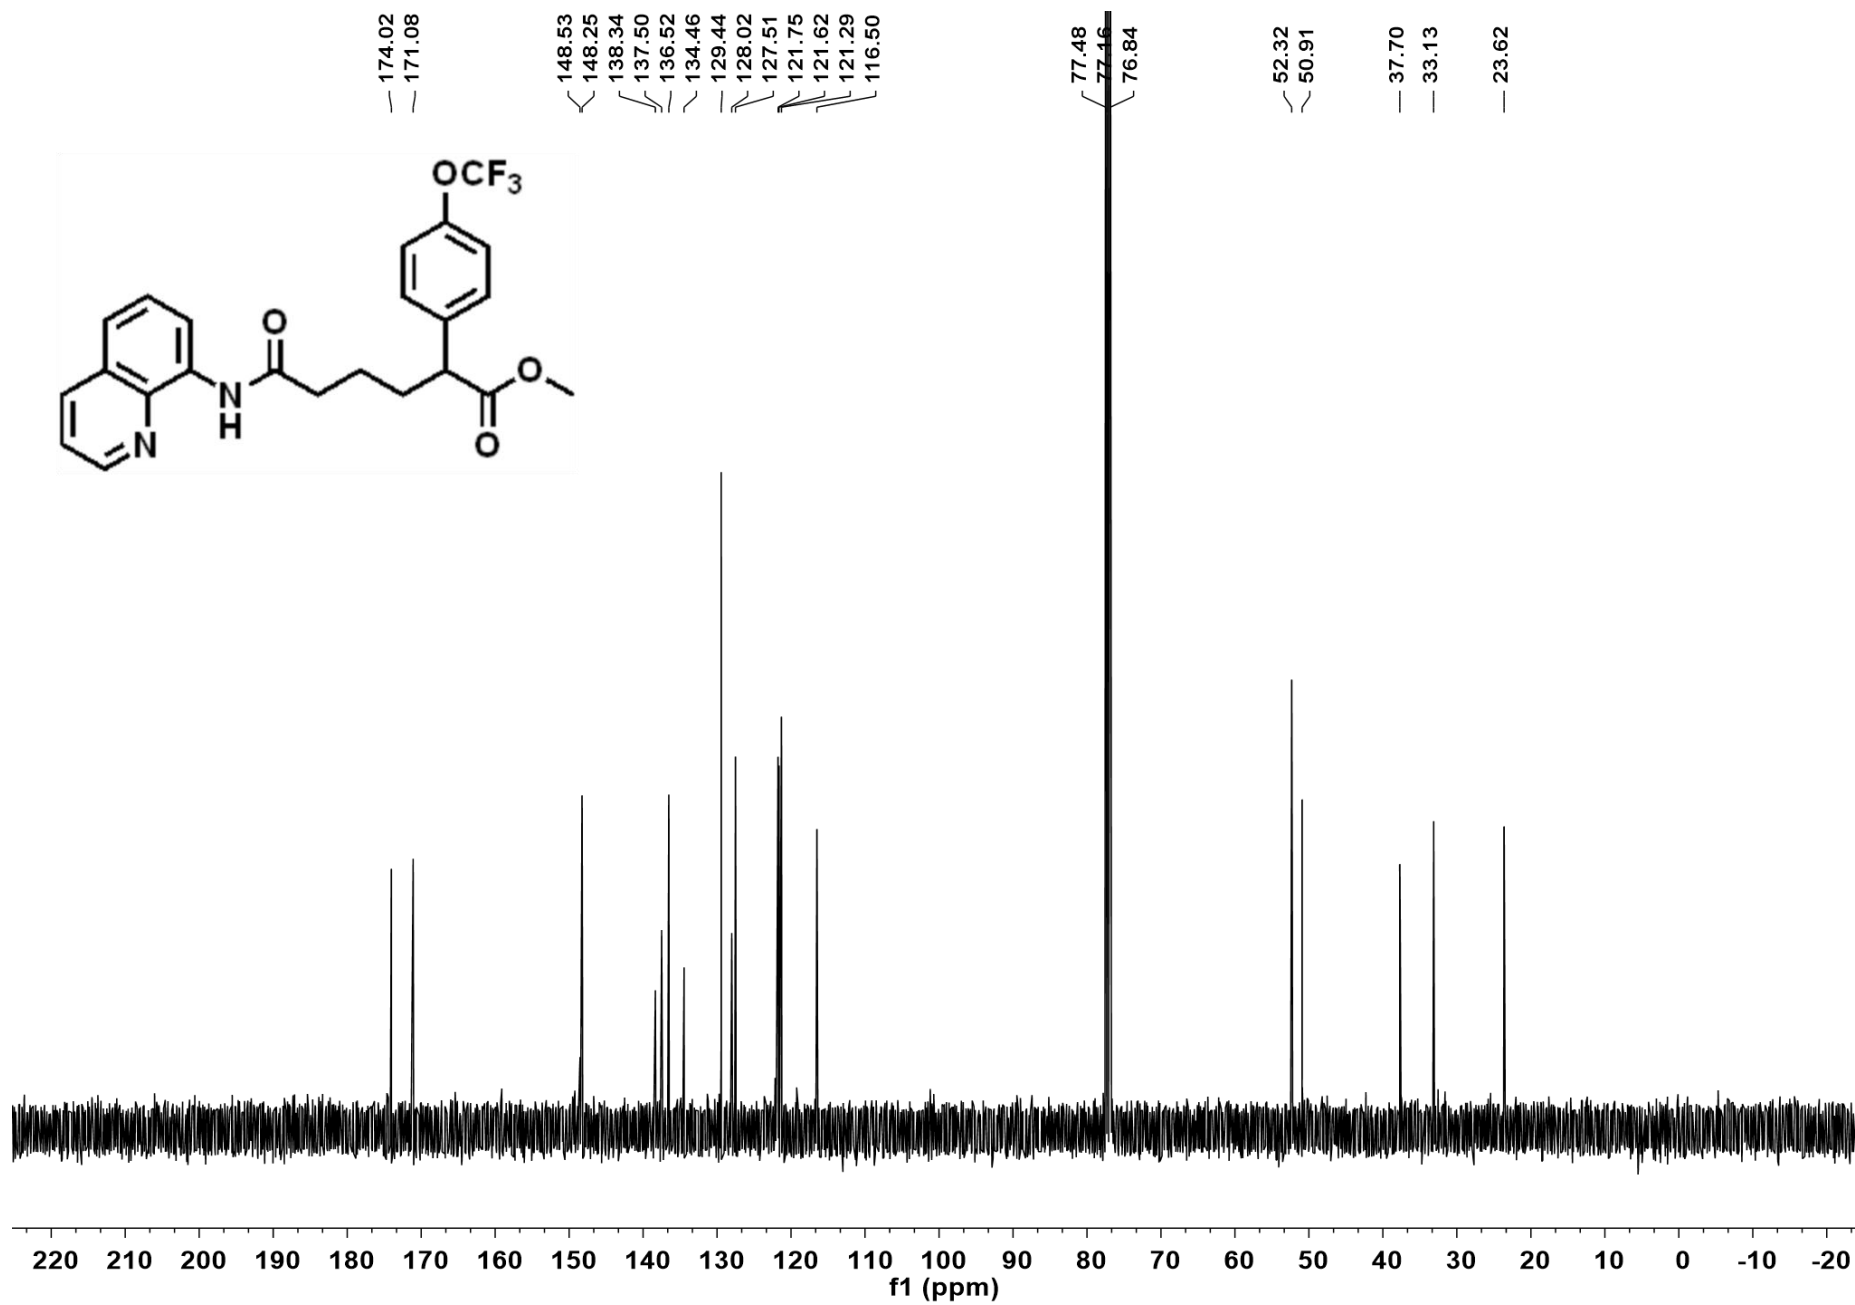

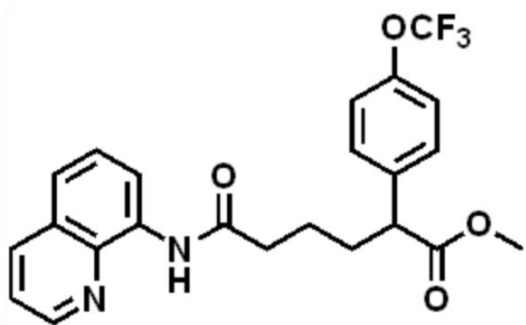

— -57.72

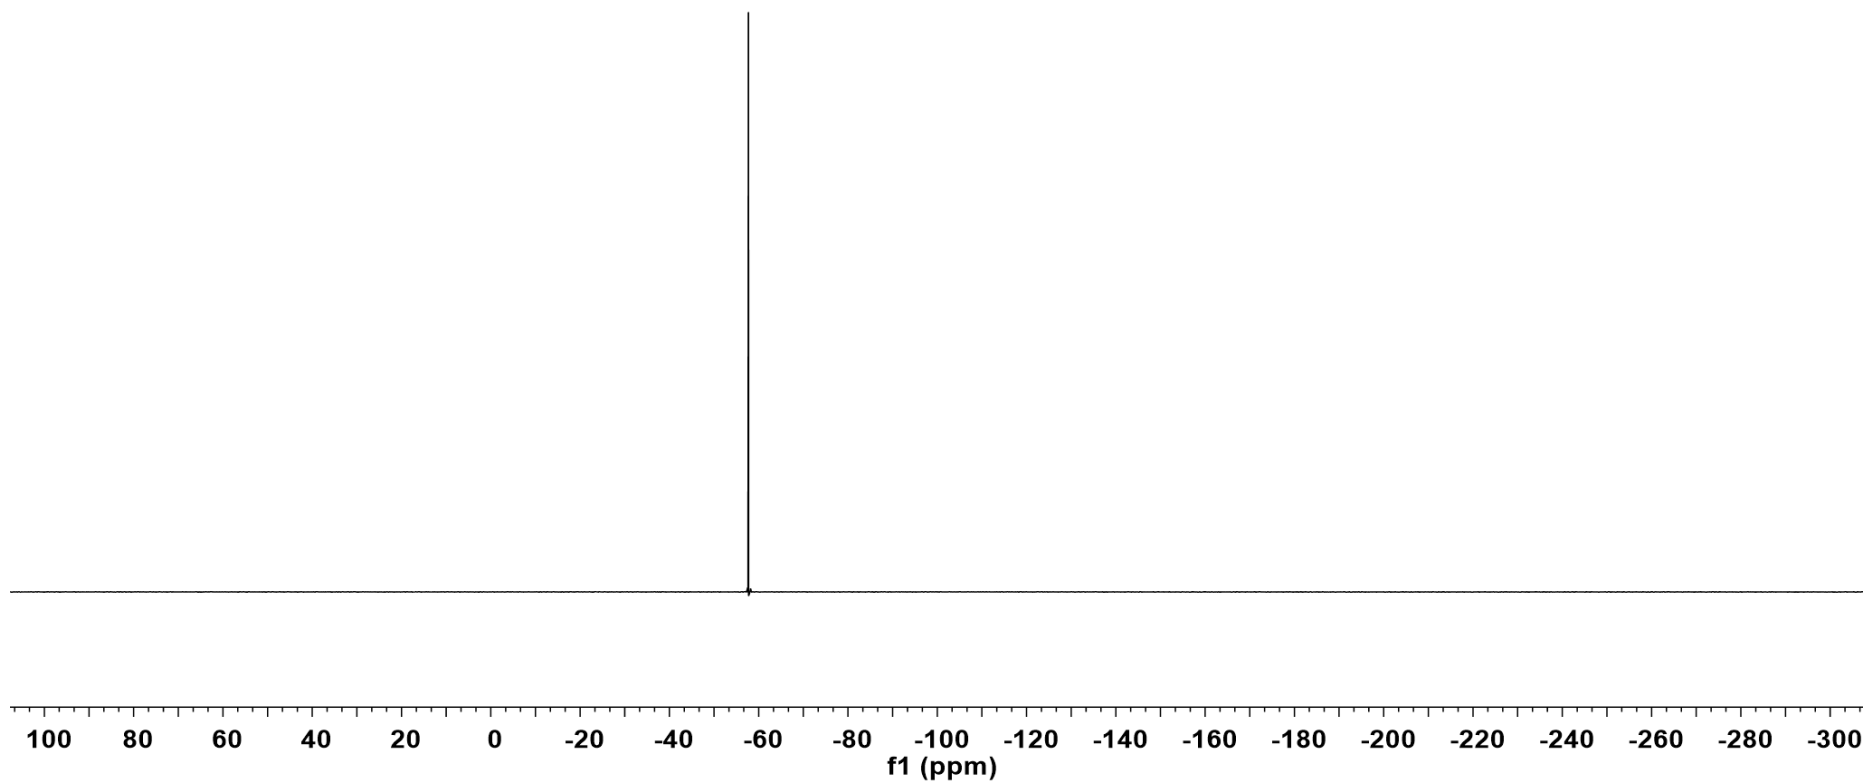

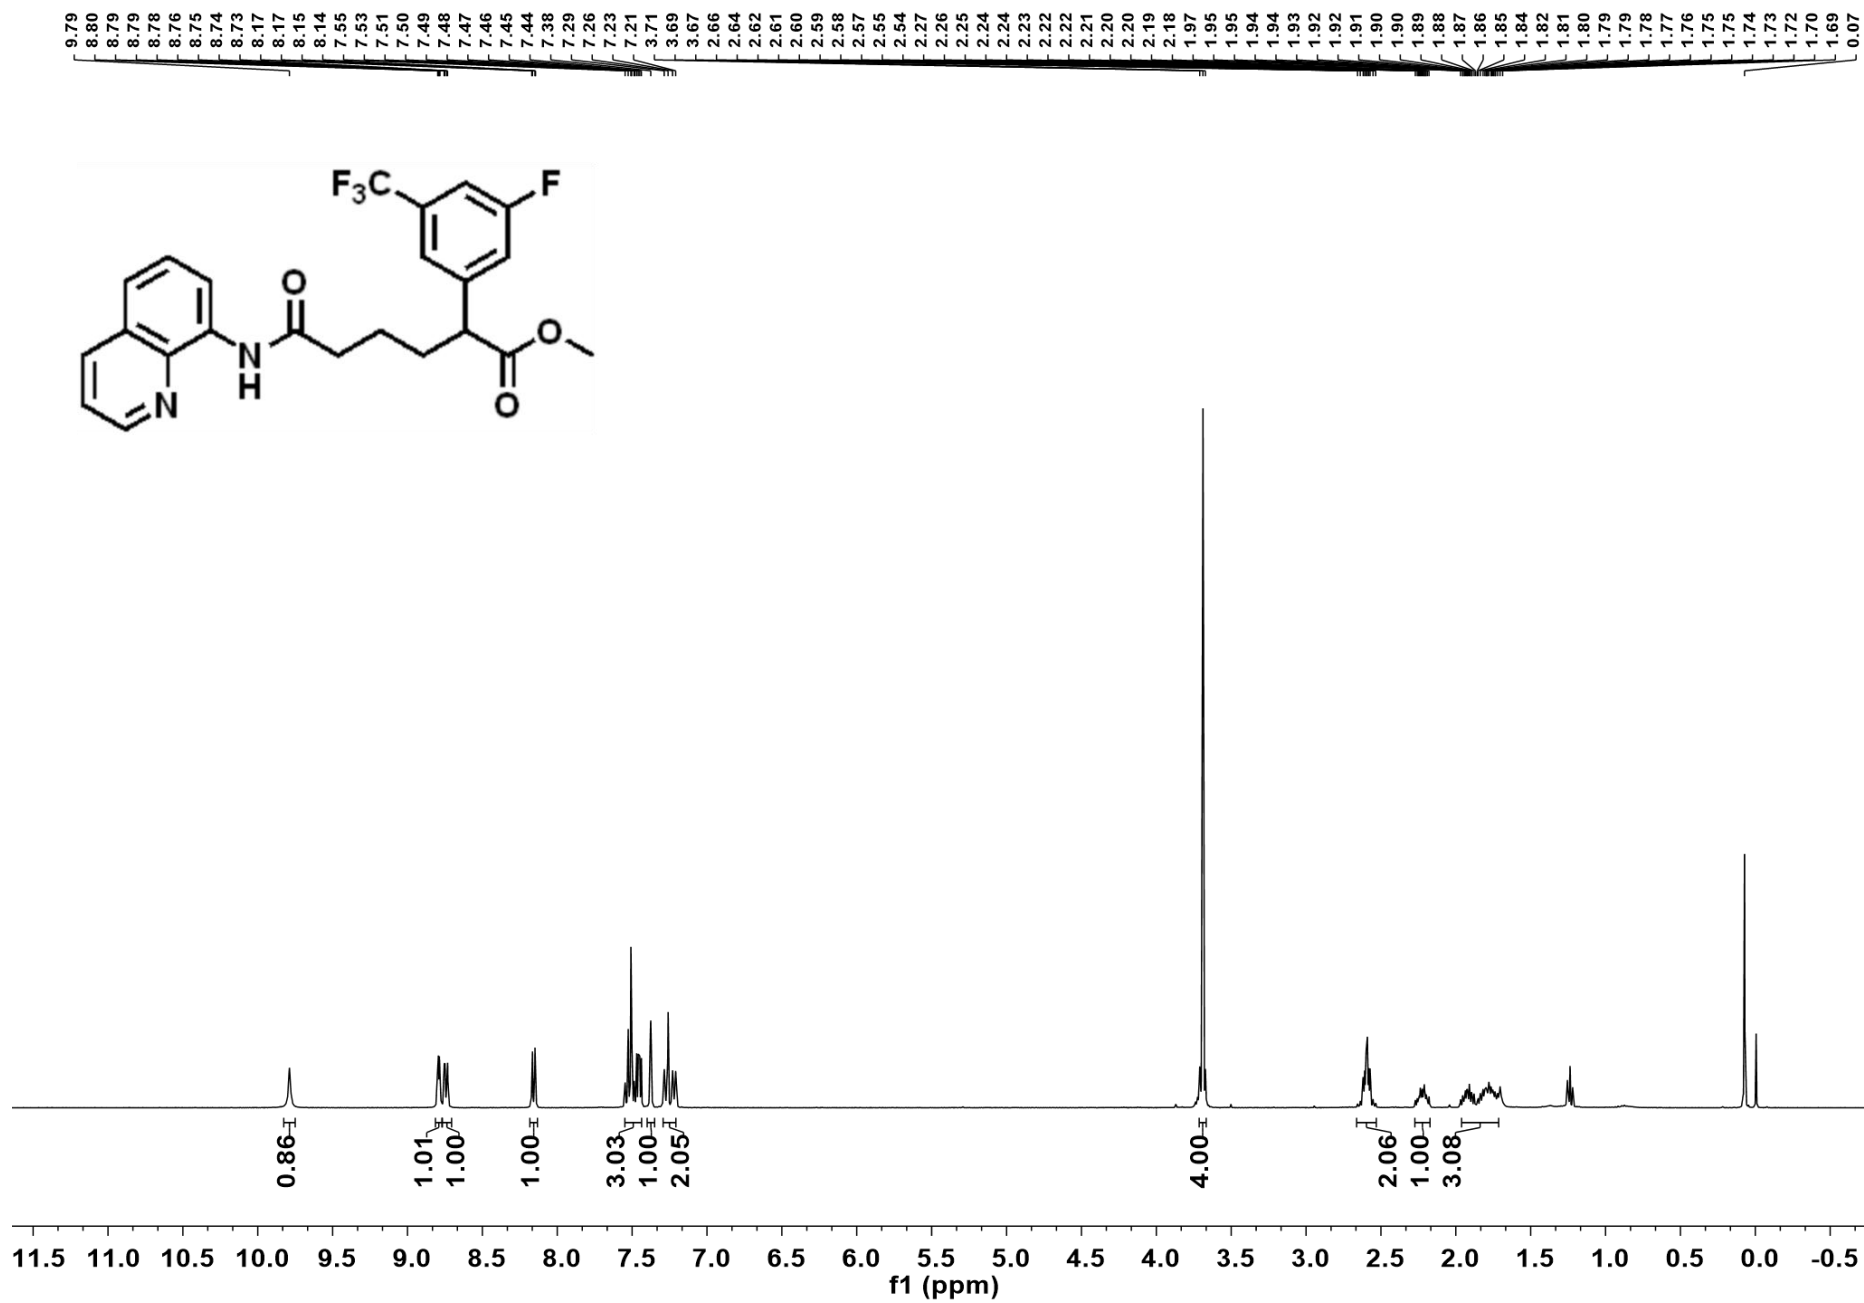

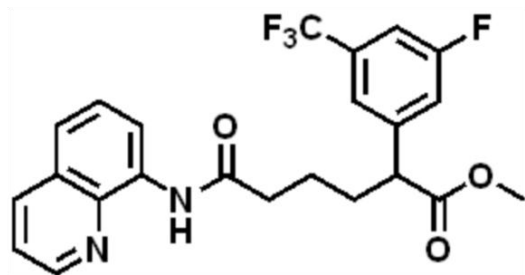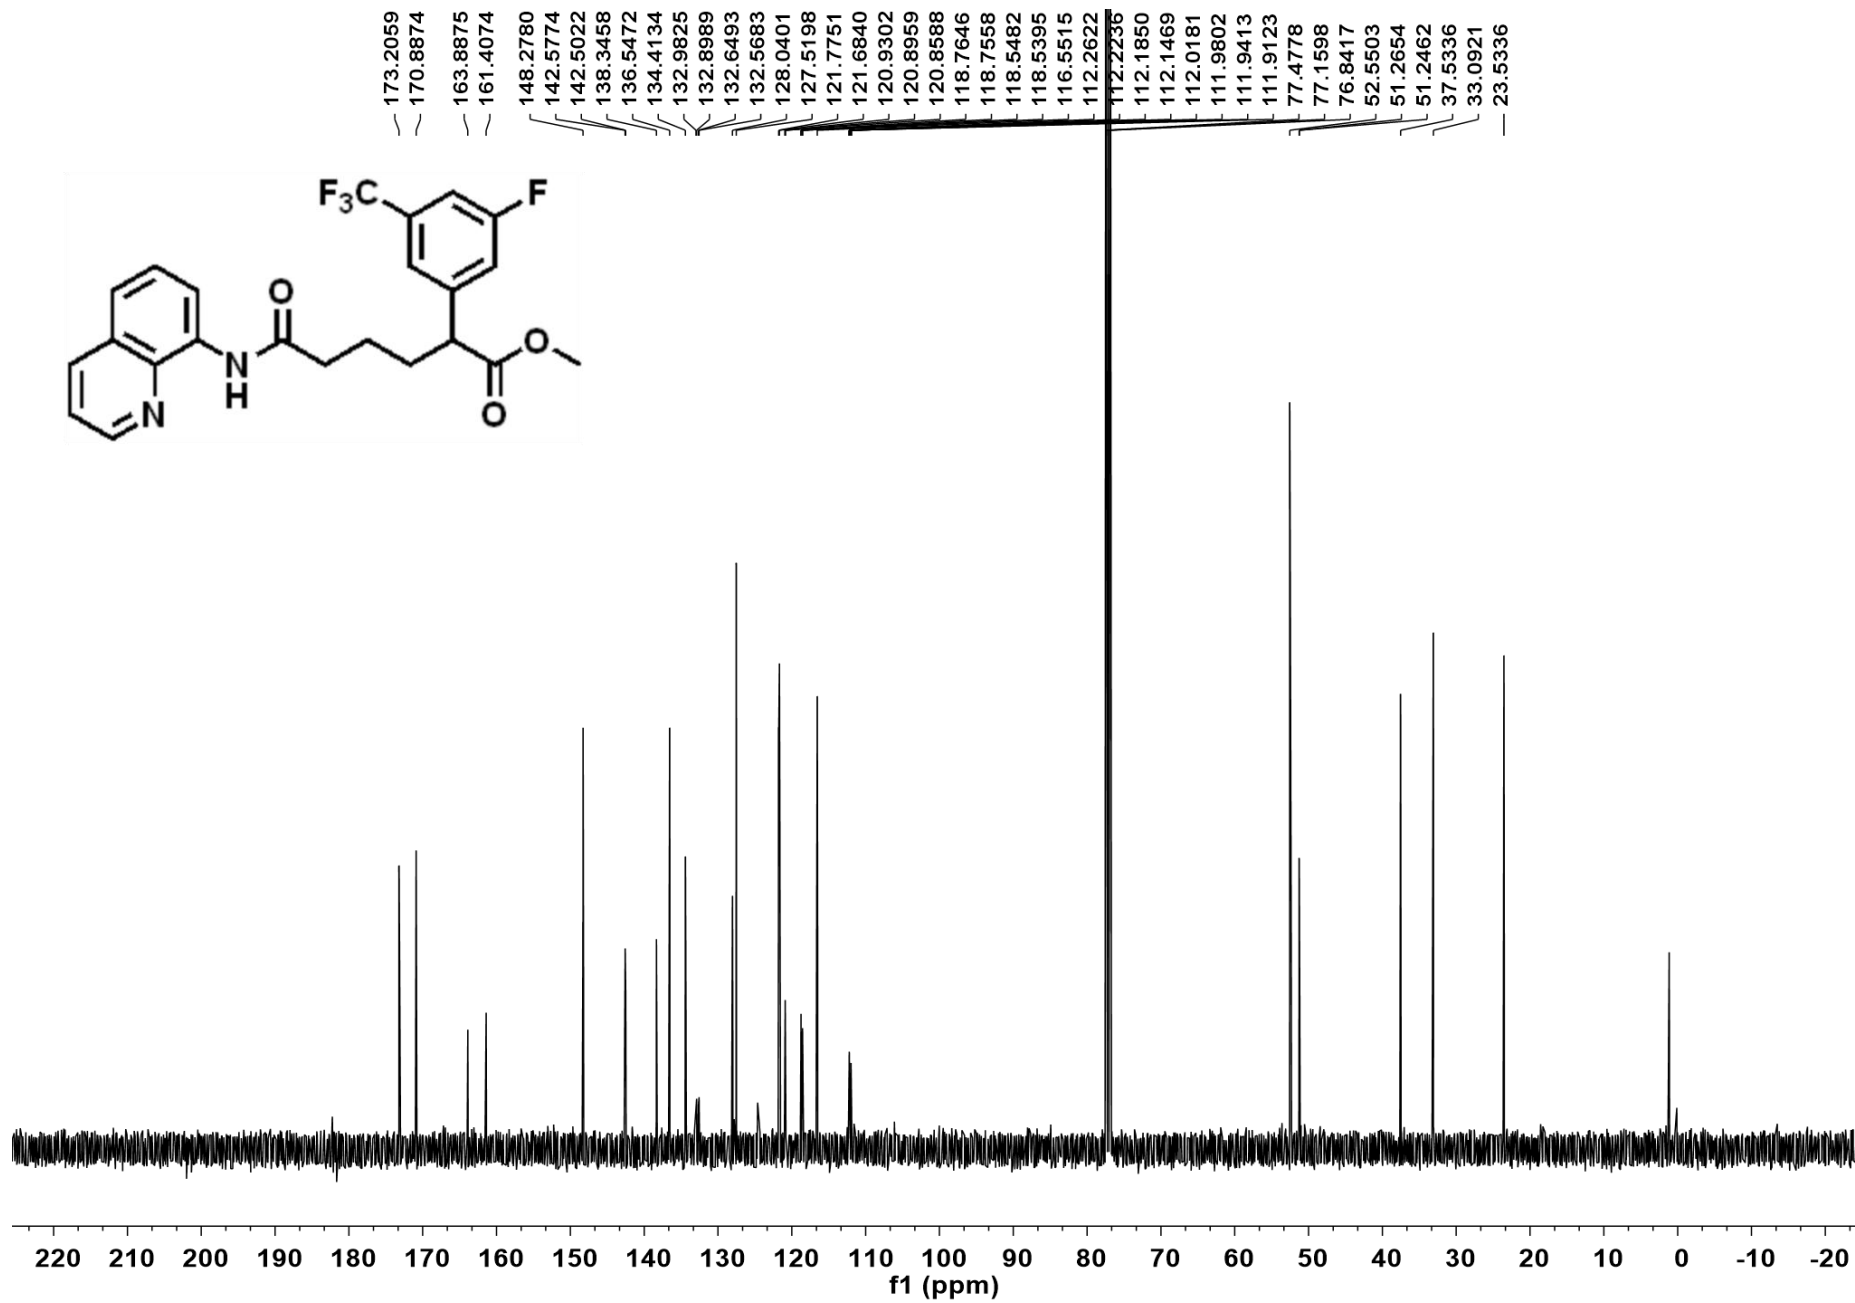

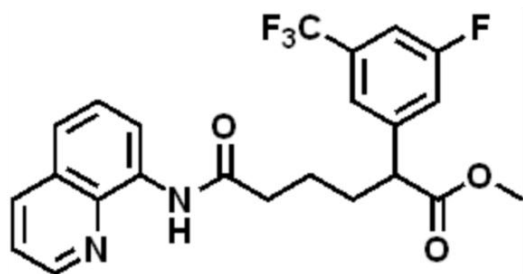

— -62.67

-110.13  
-110.16  
-110.18

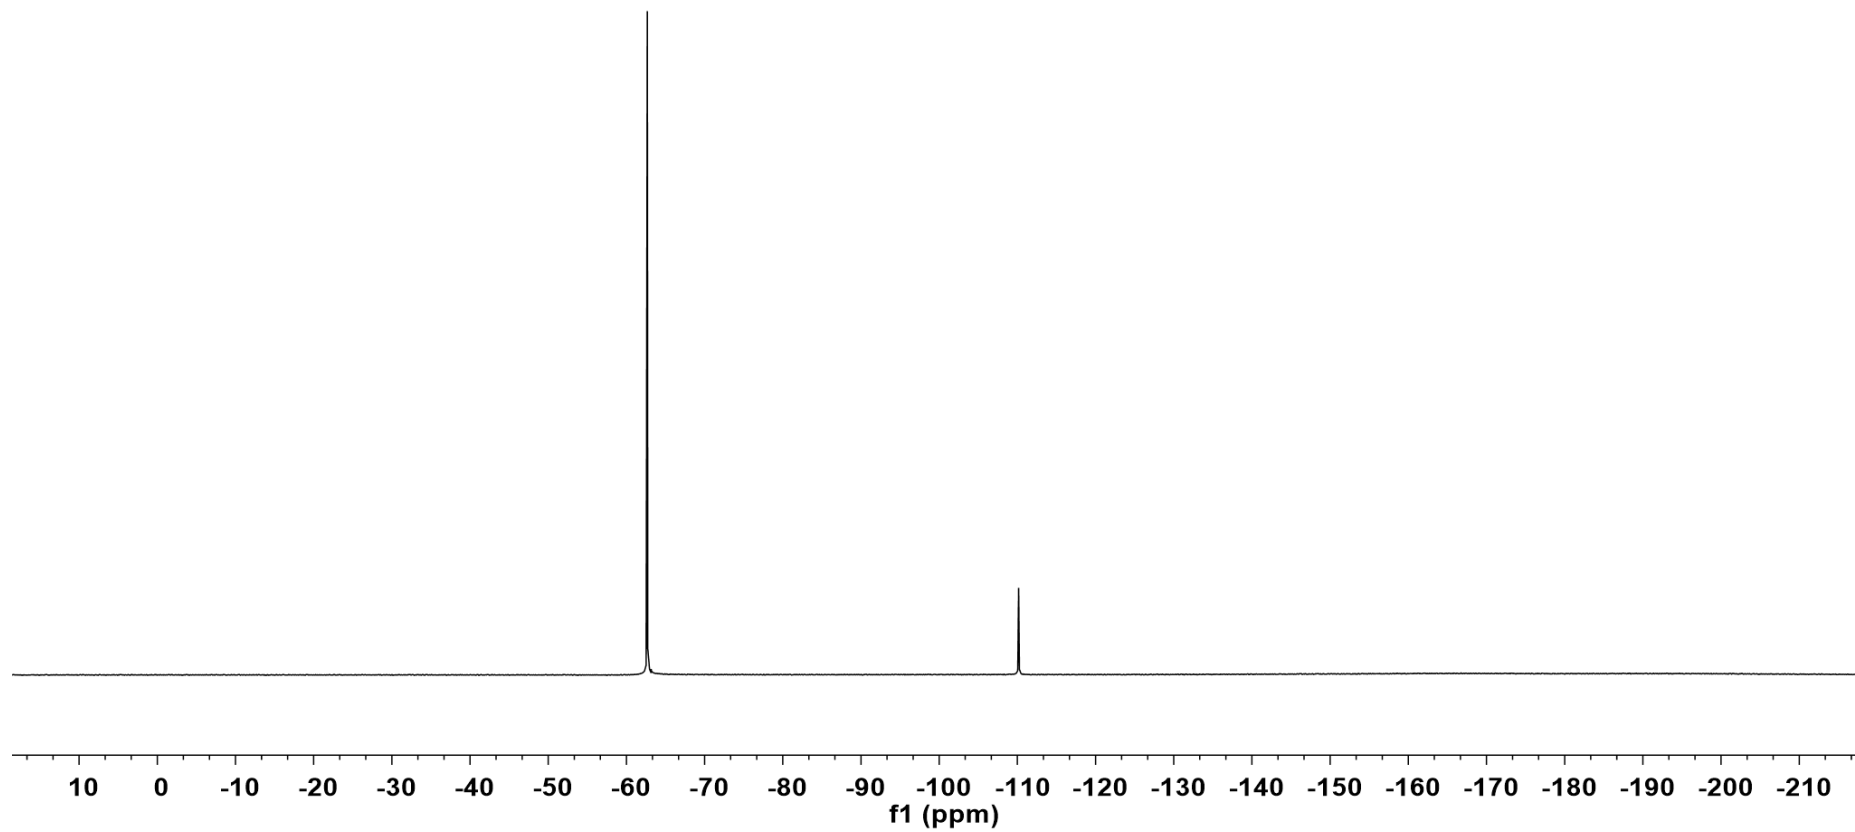

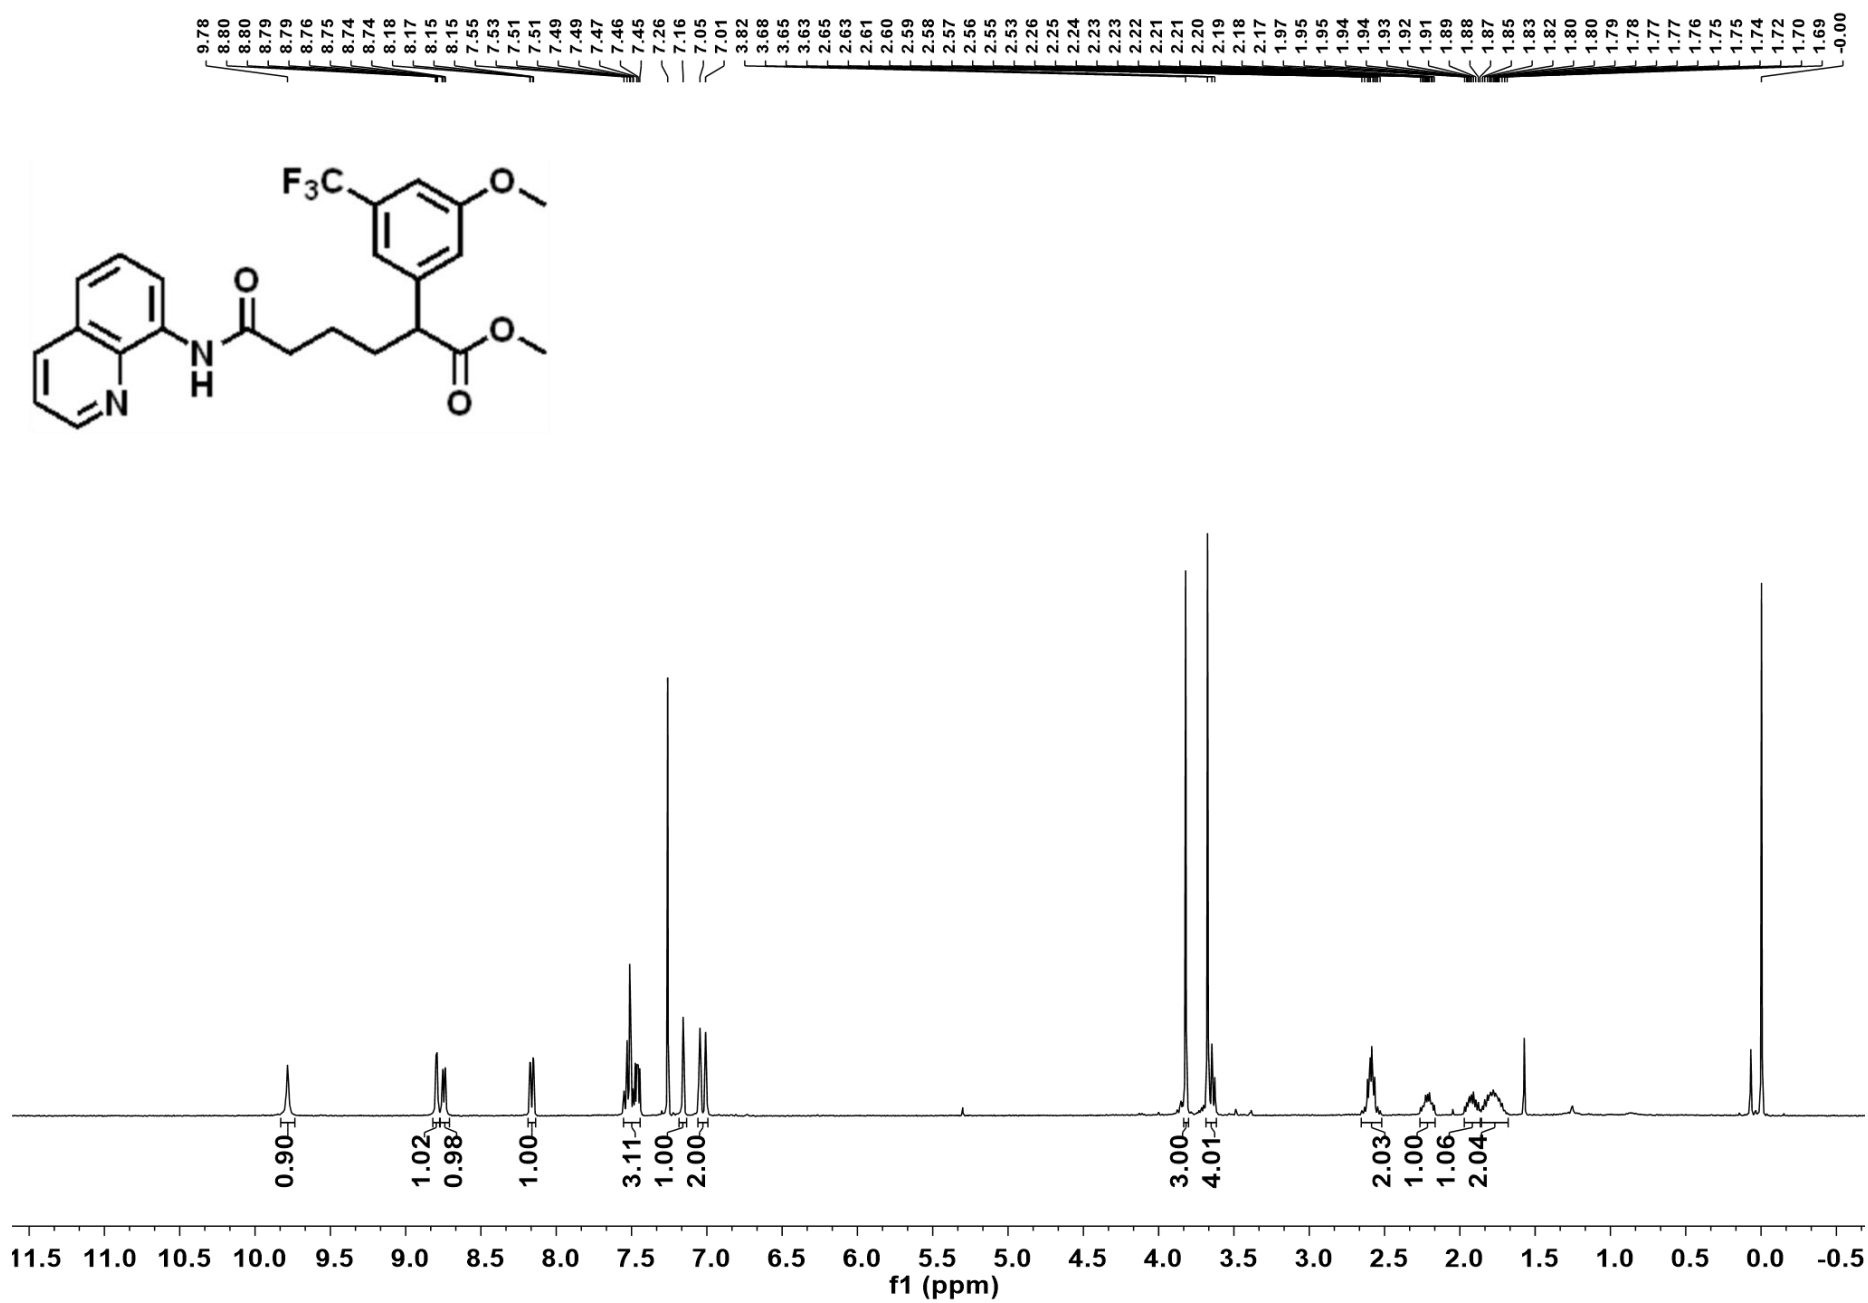

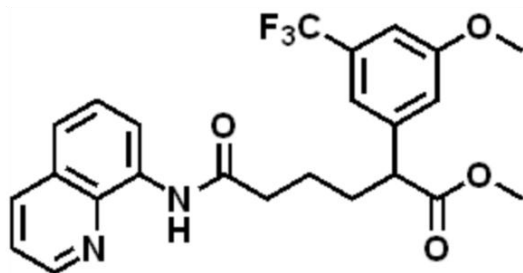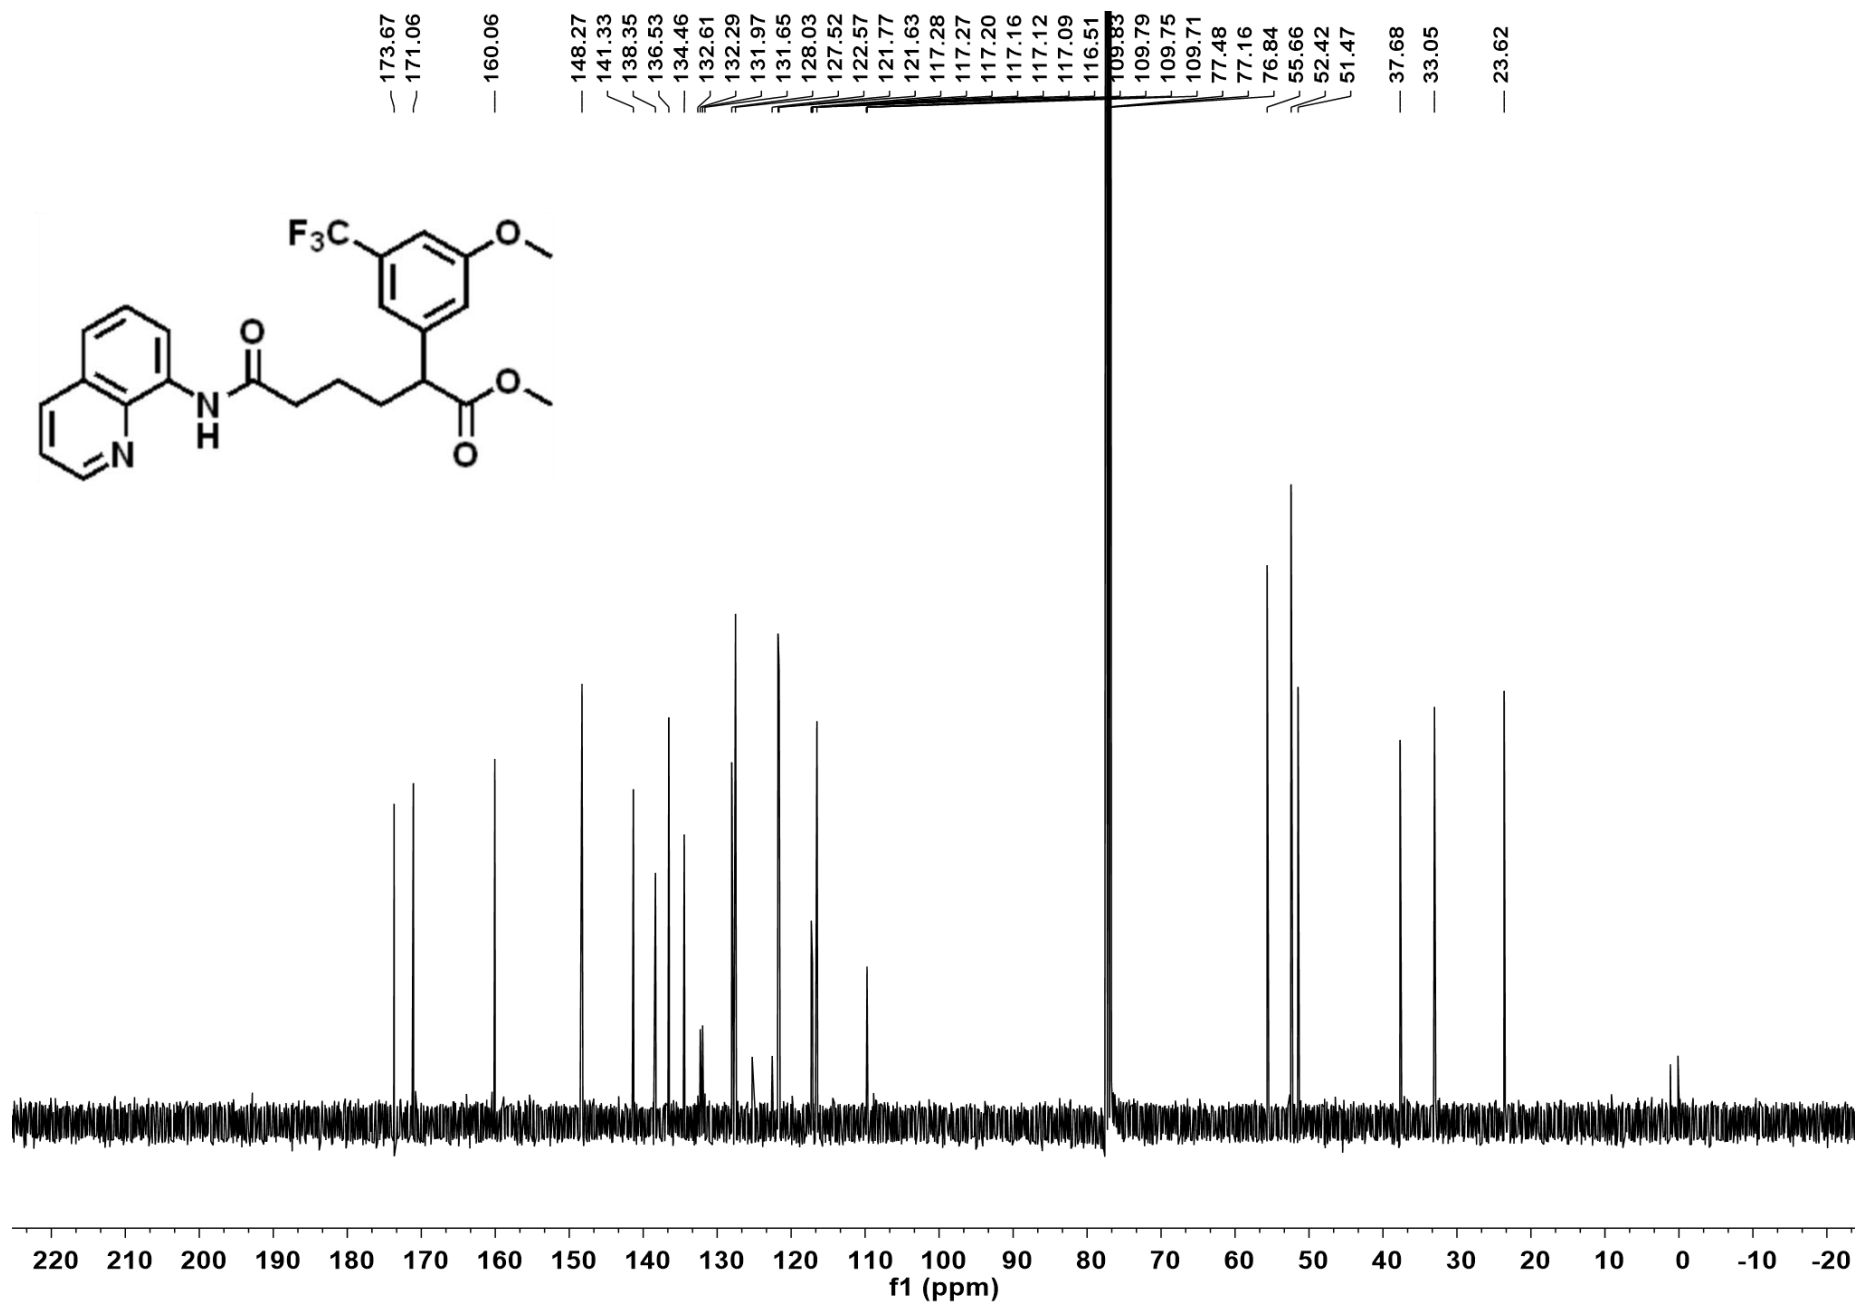

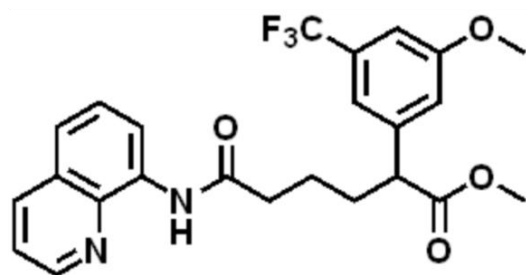

— -62.45

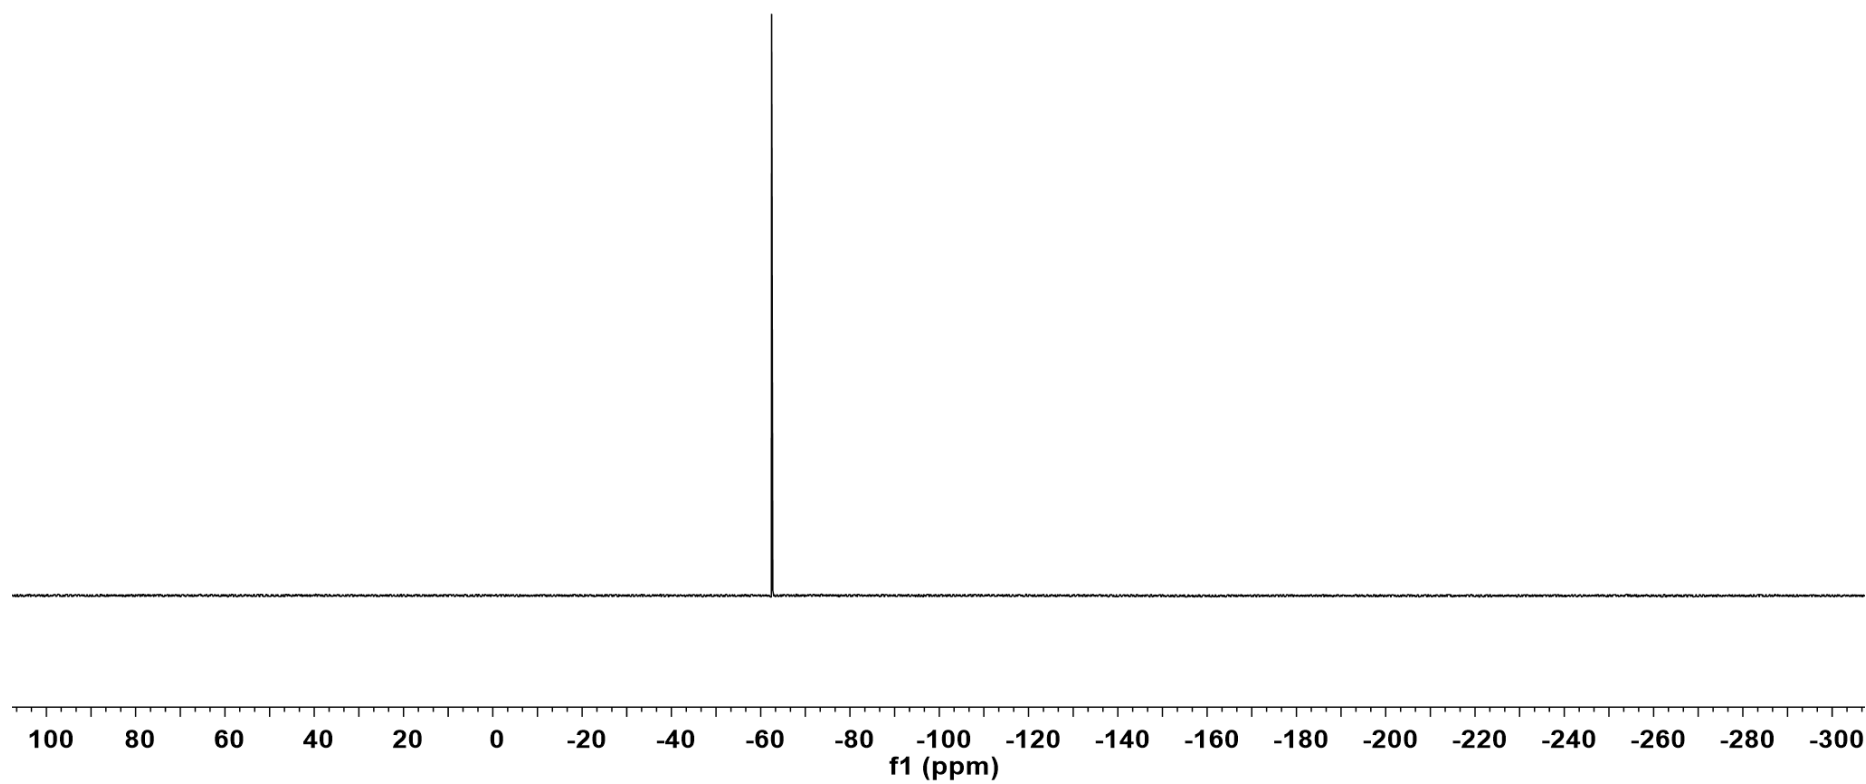



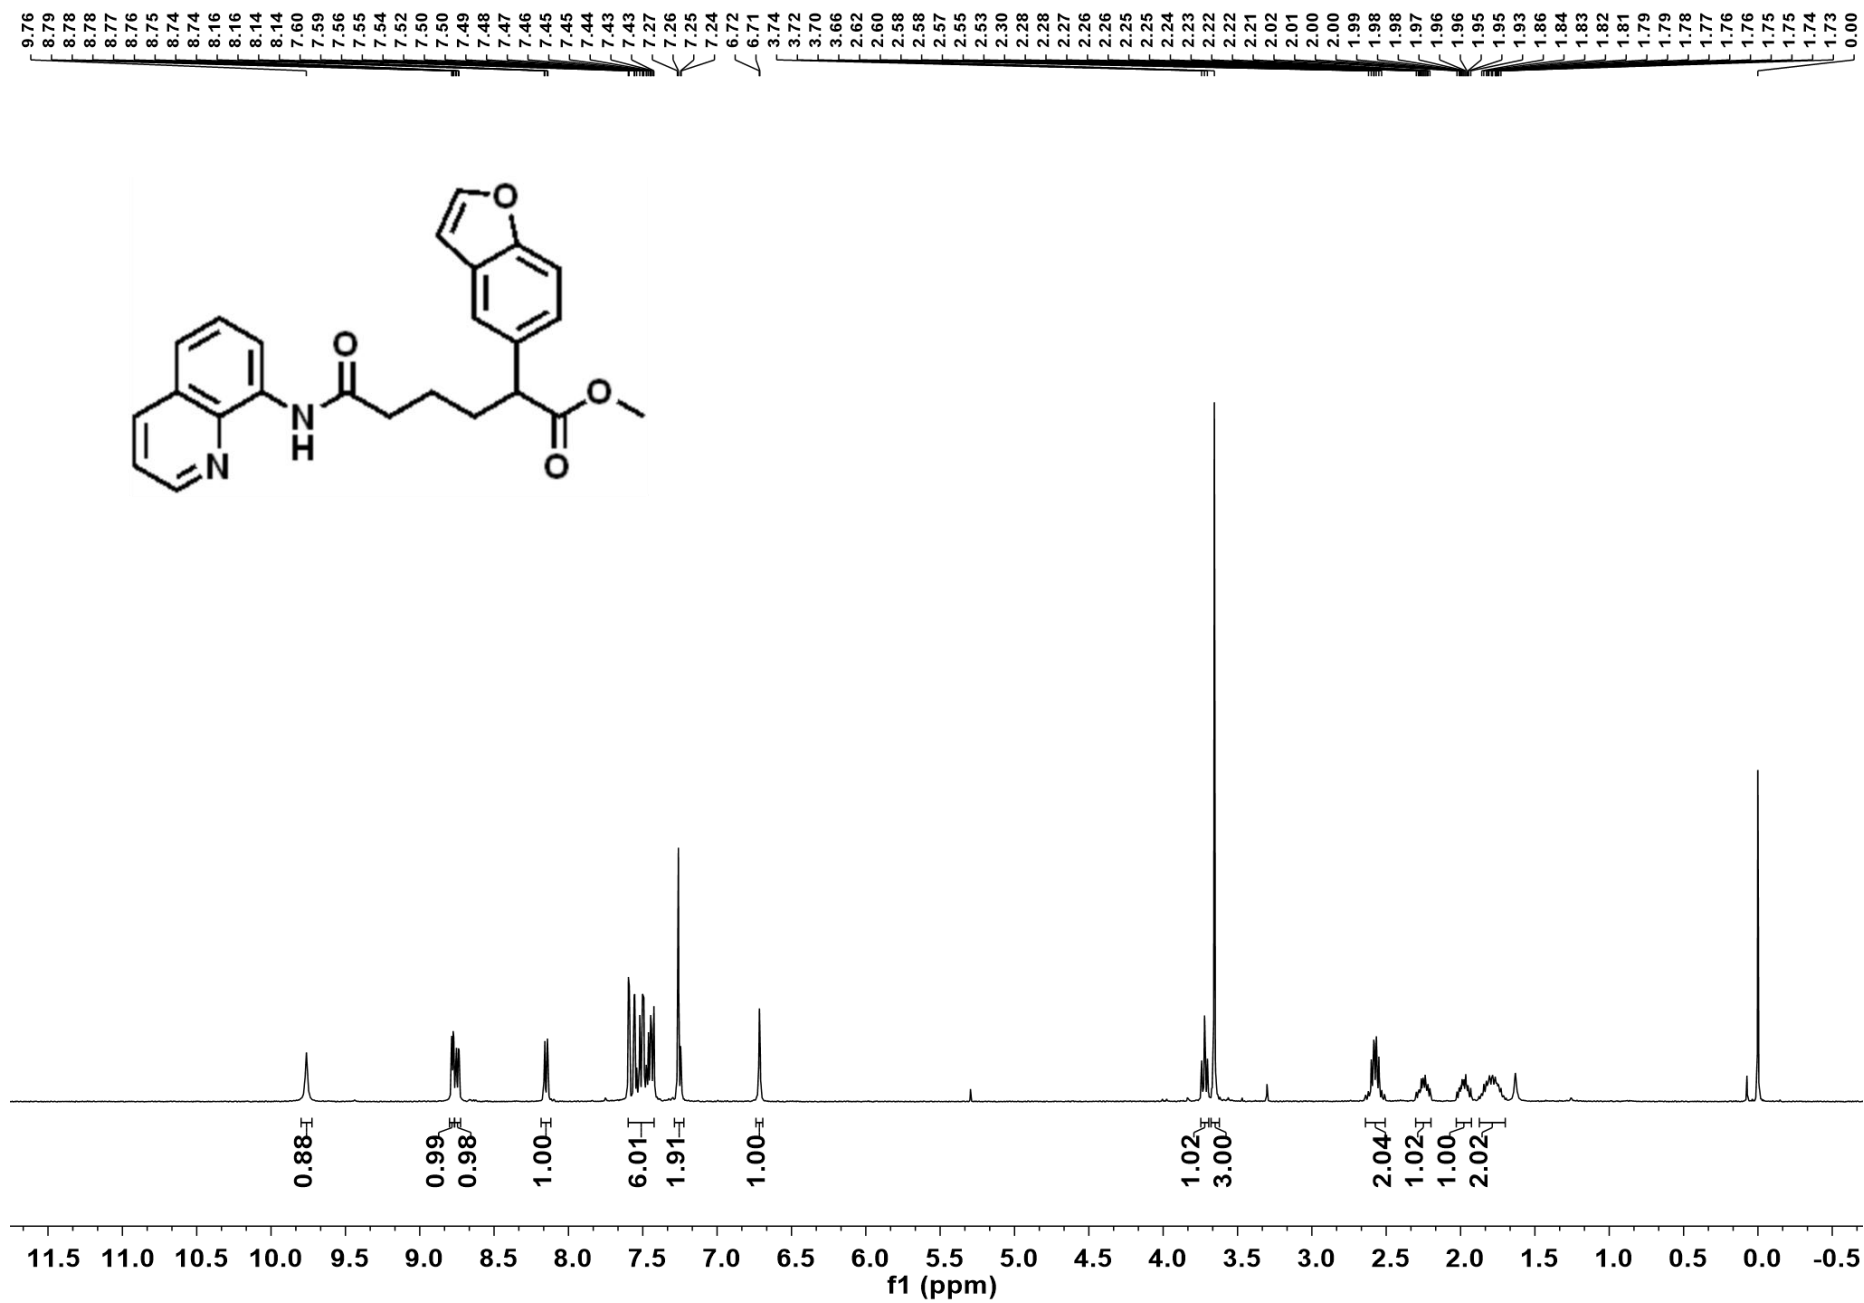

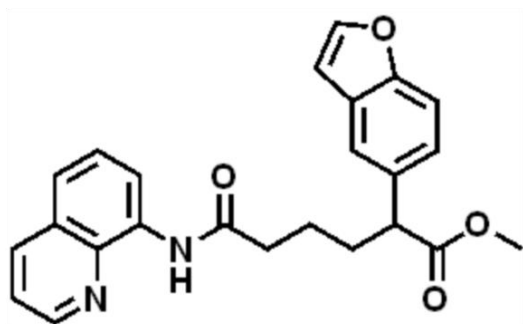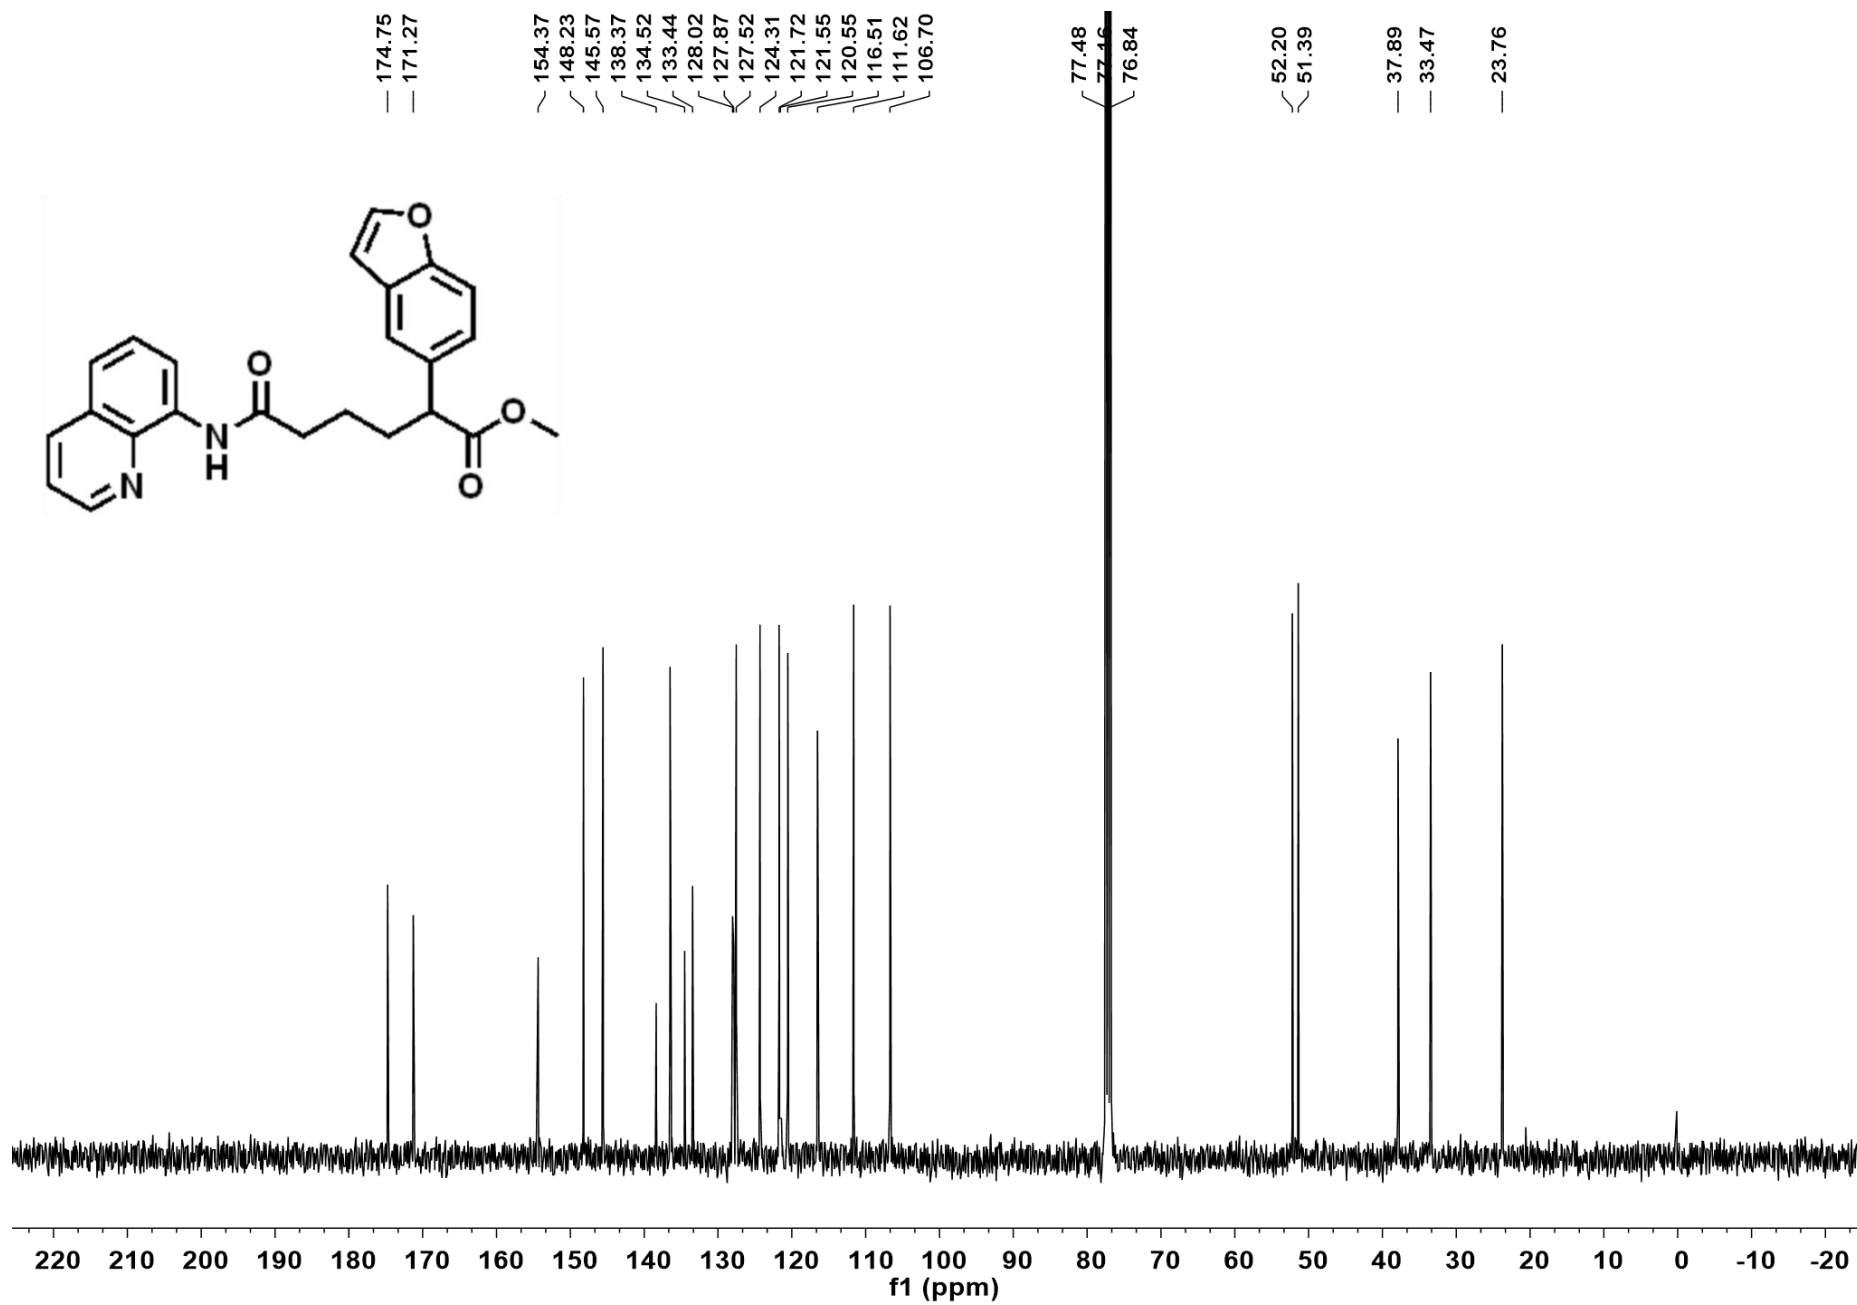

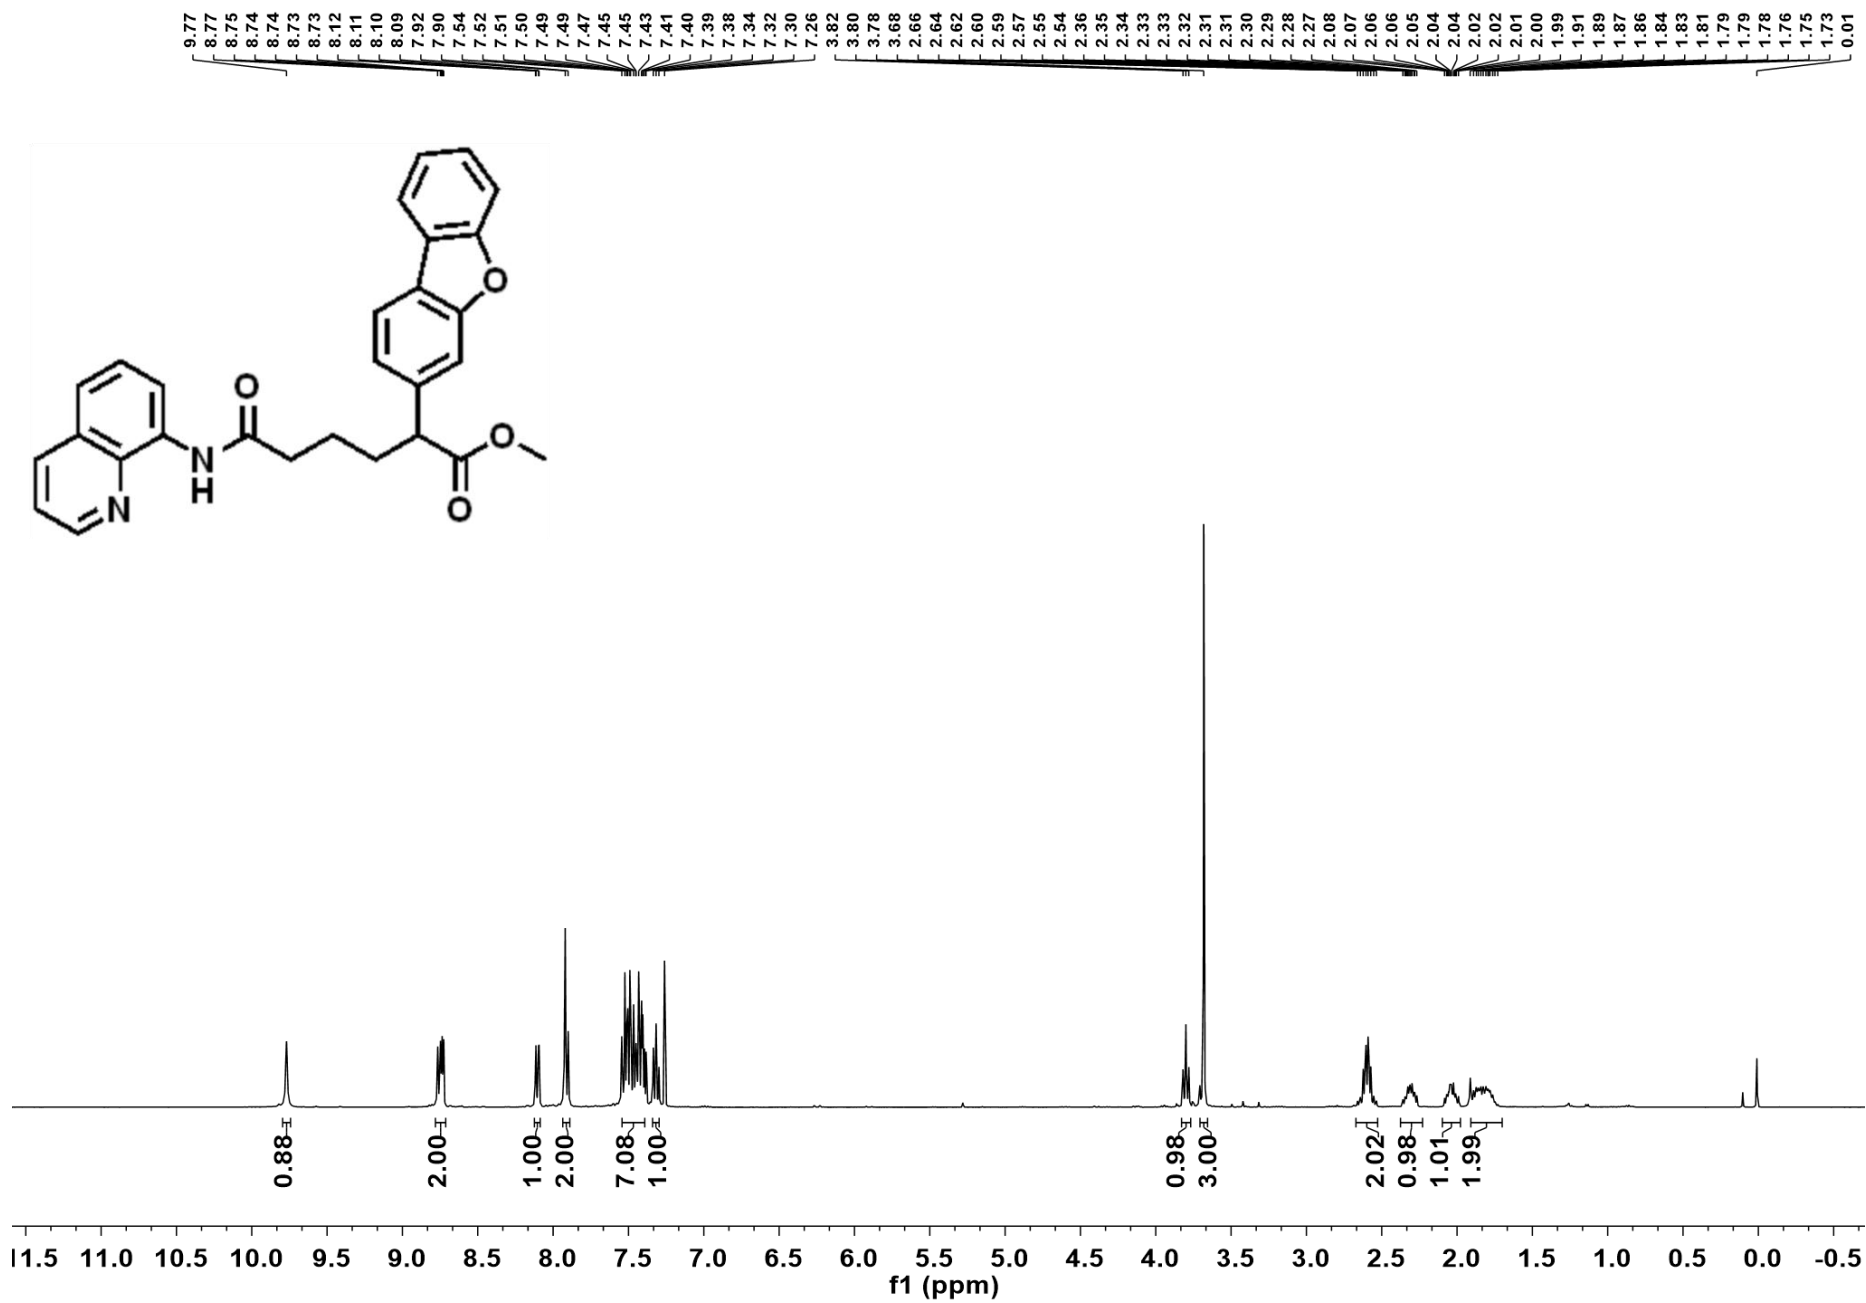

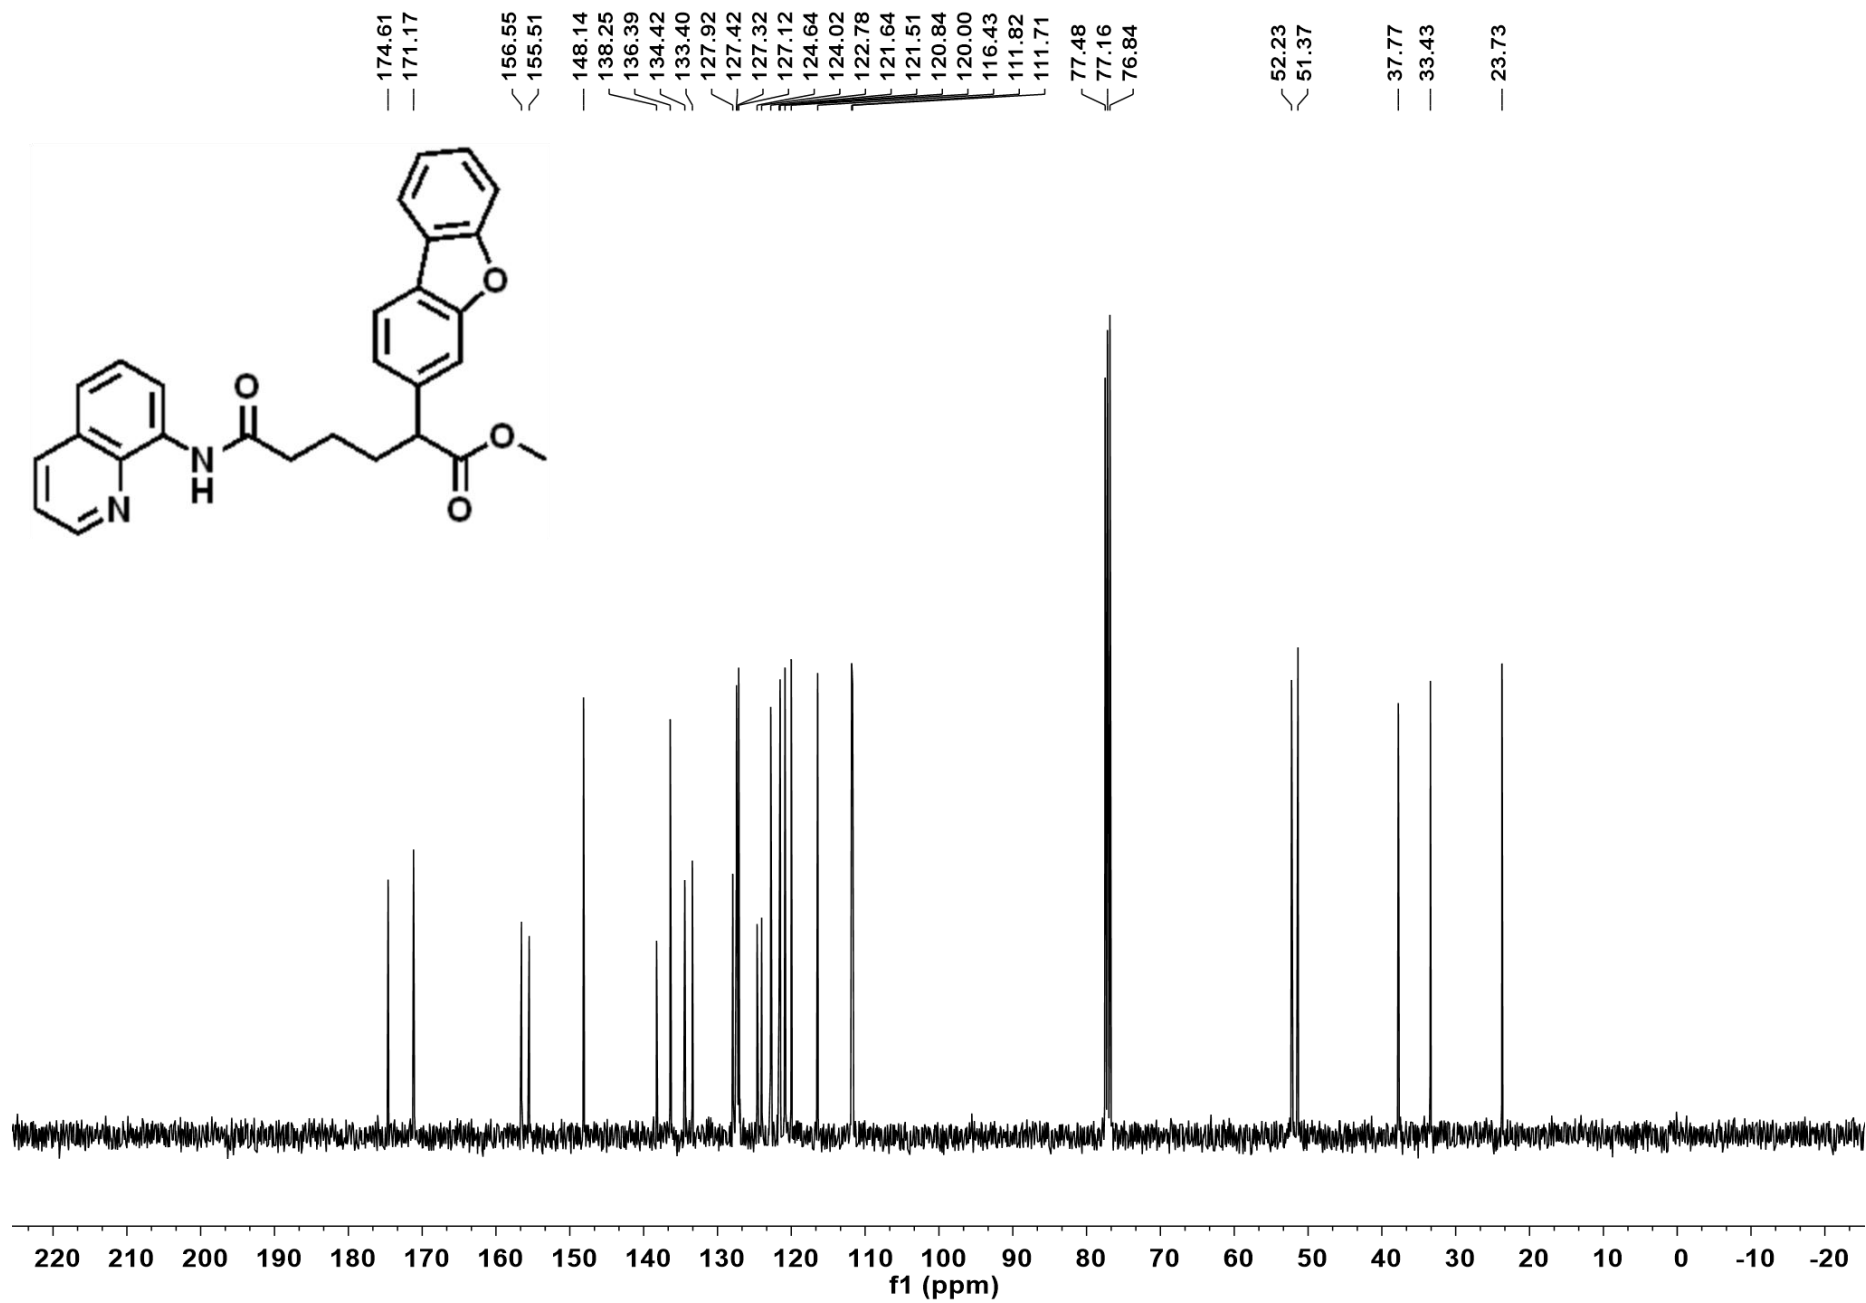

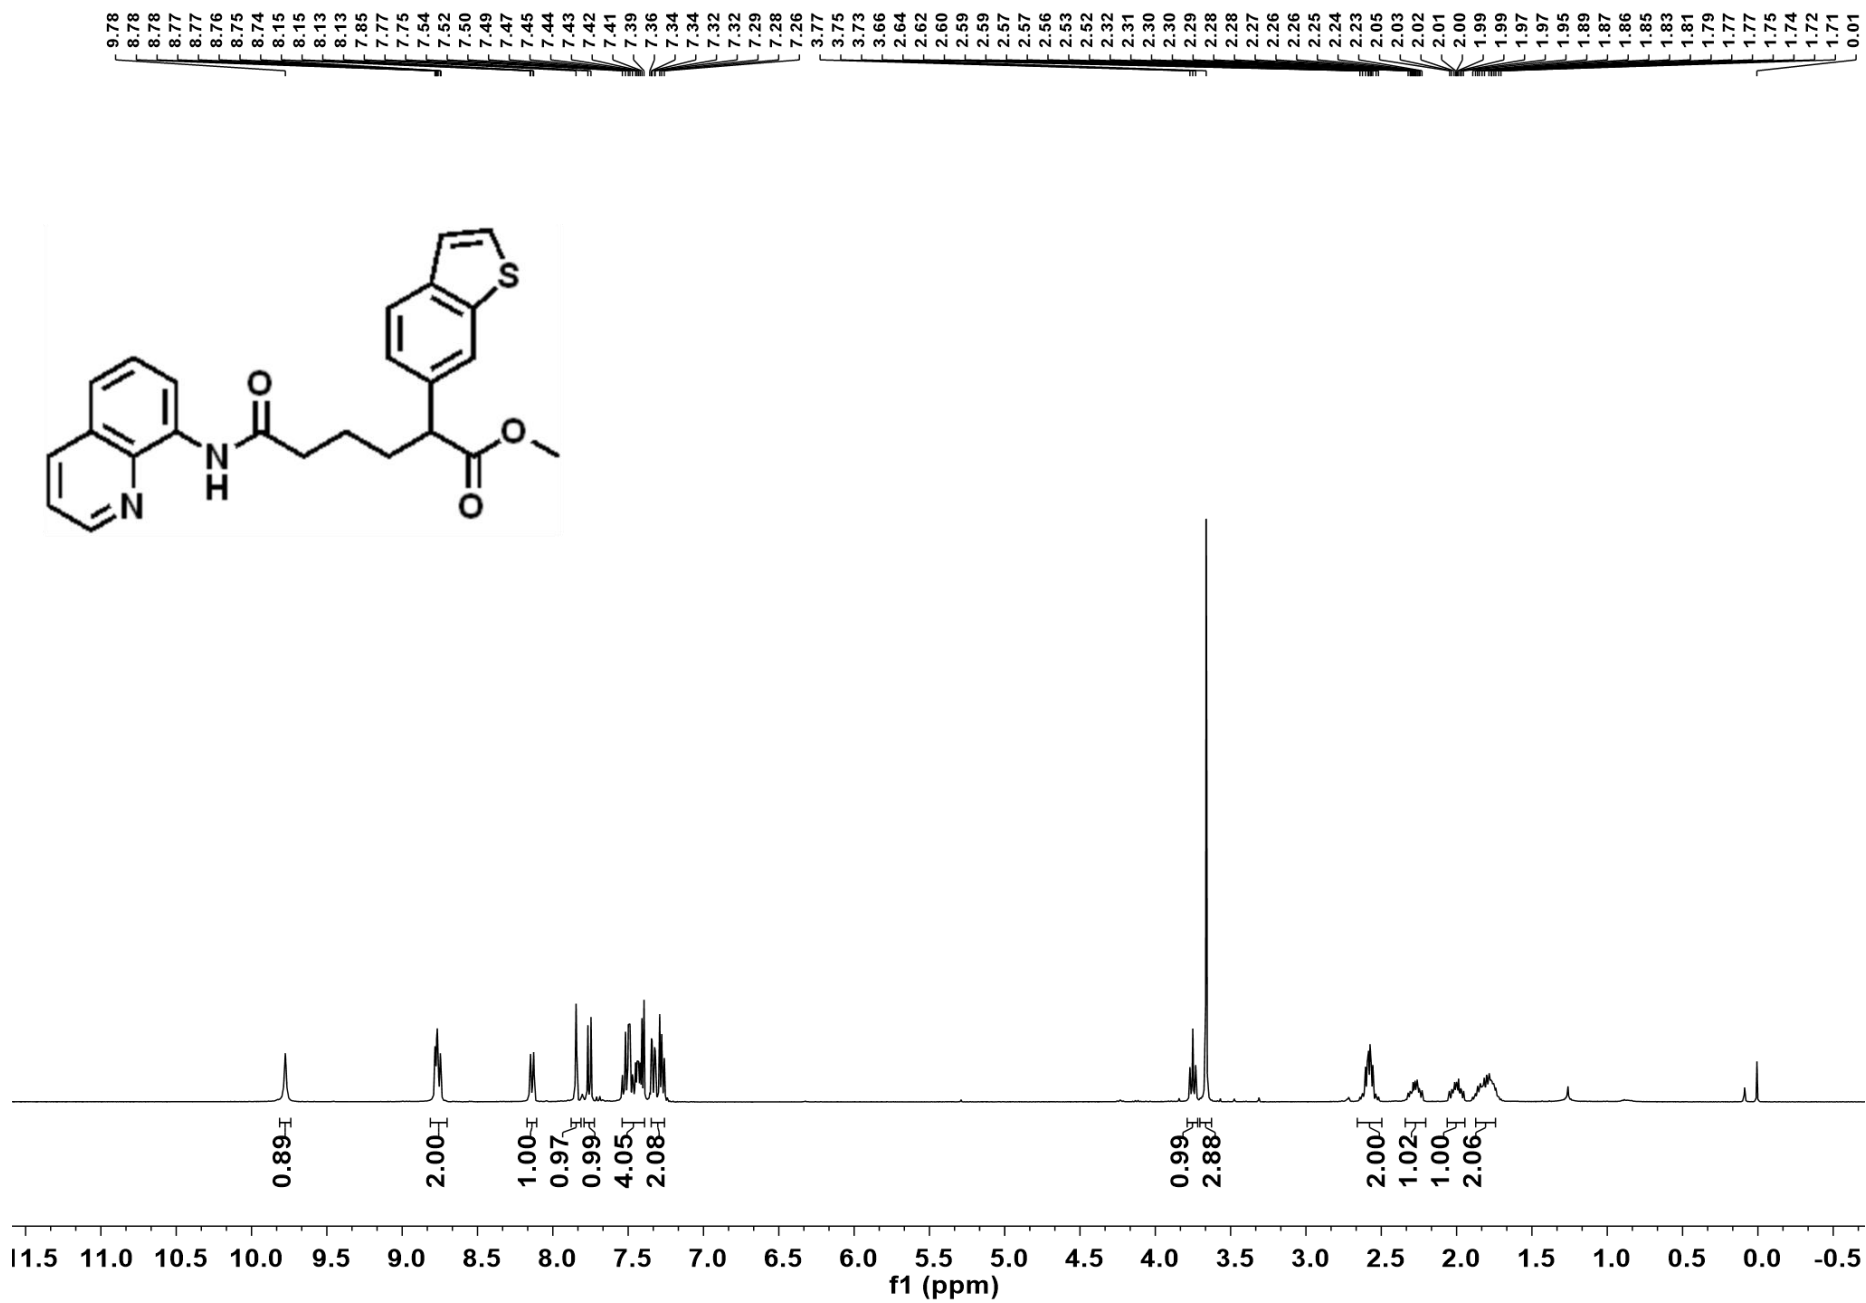

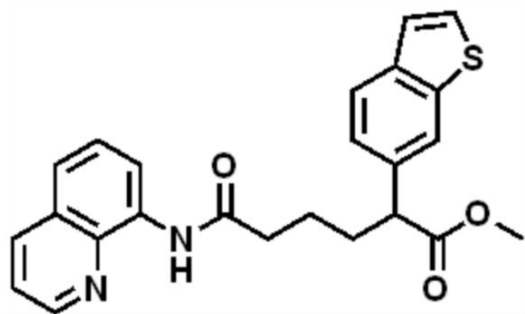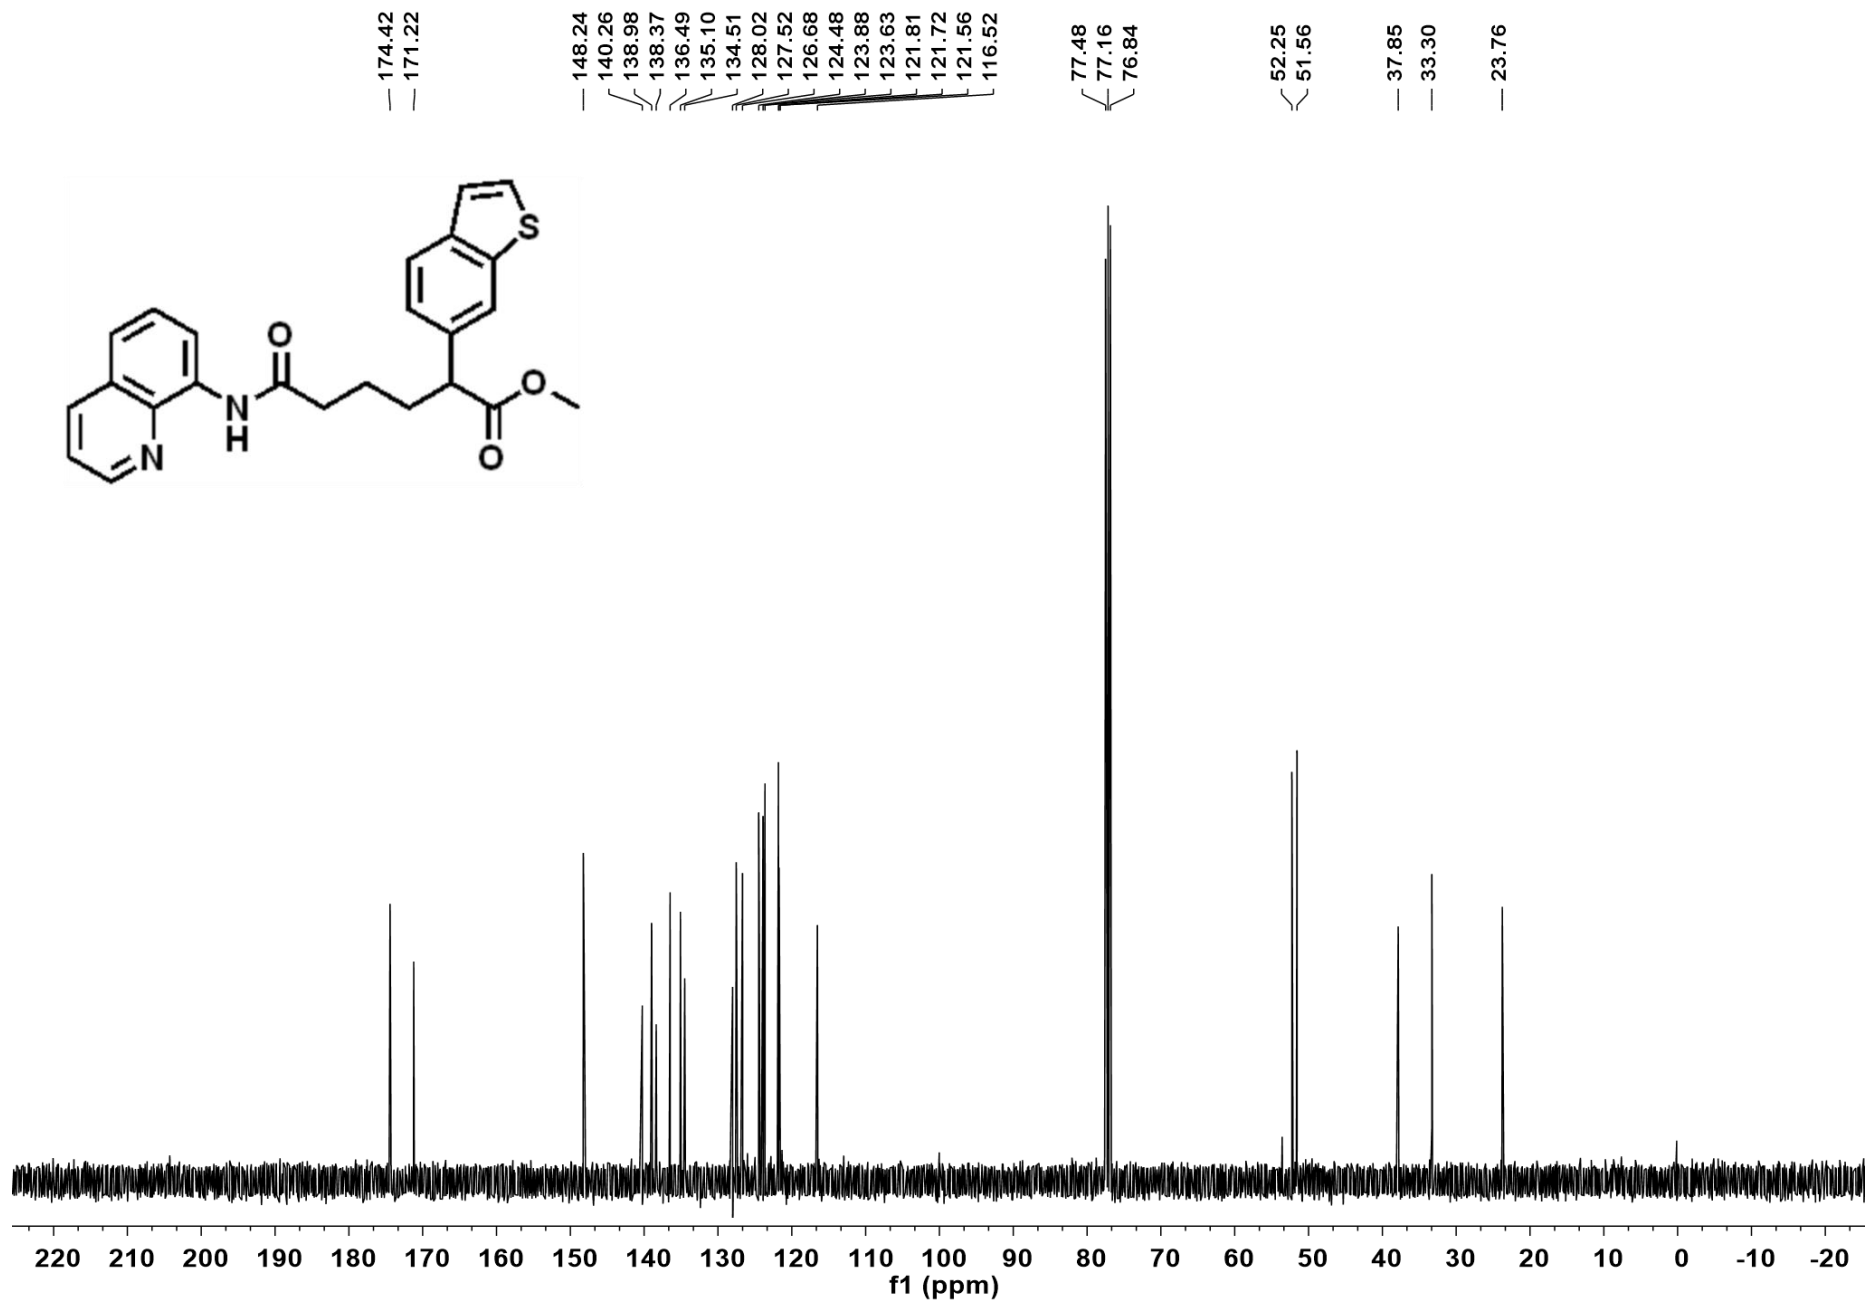

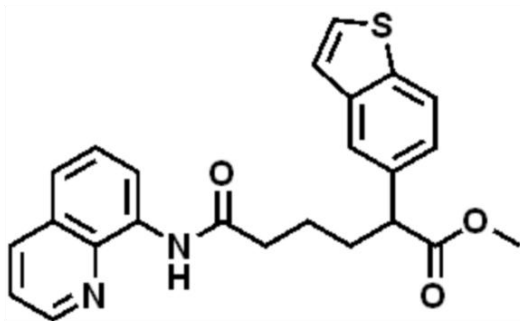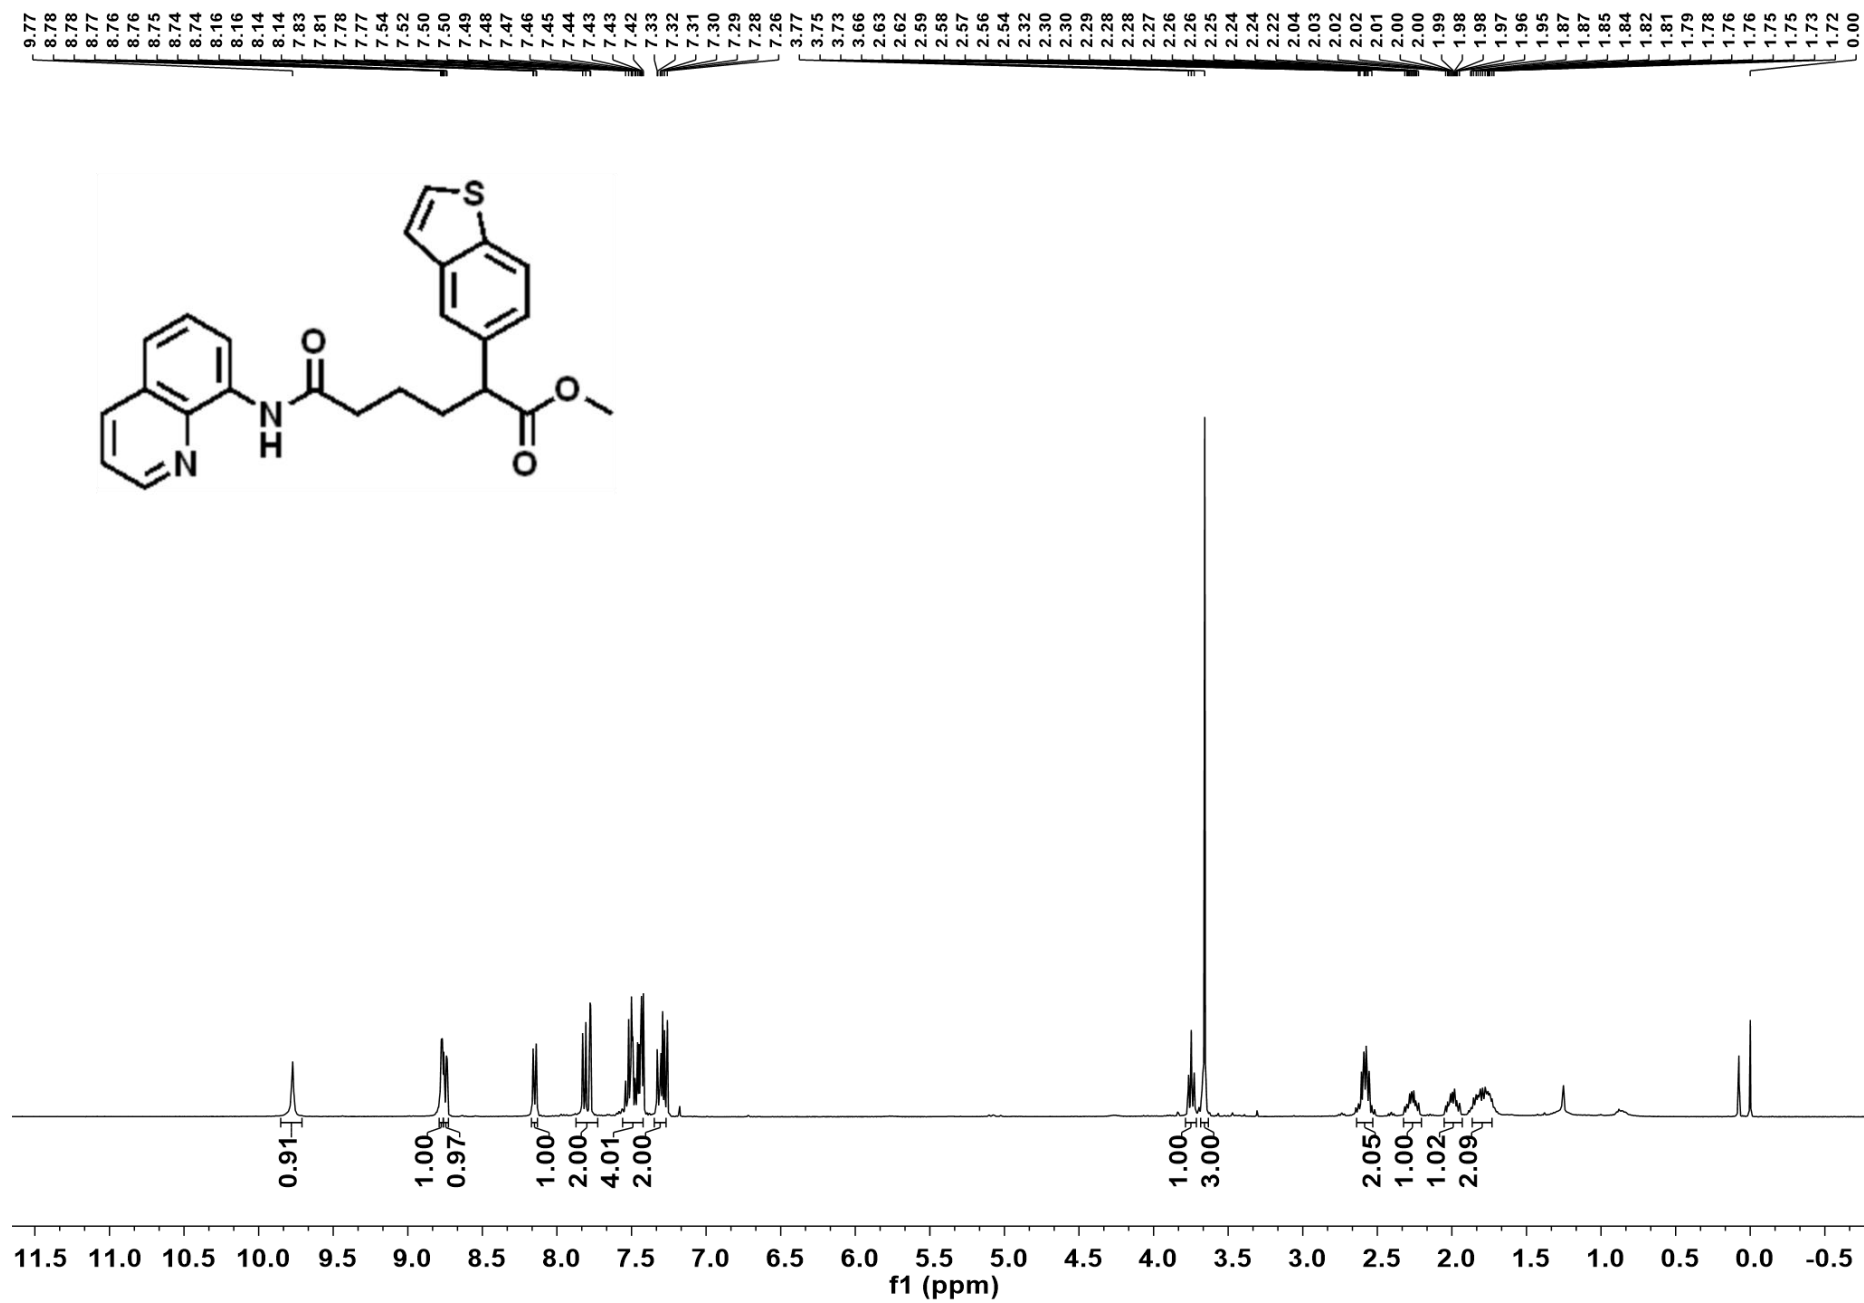

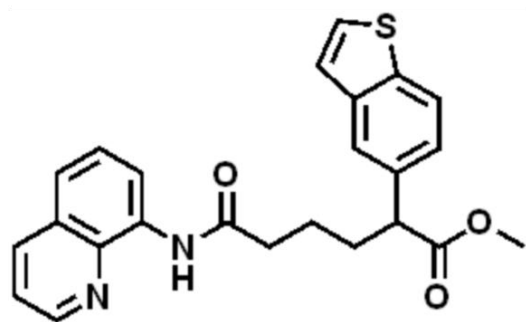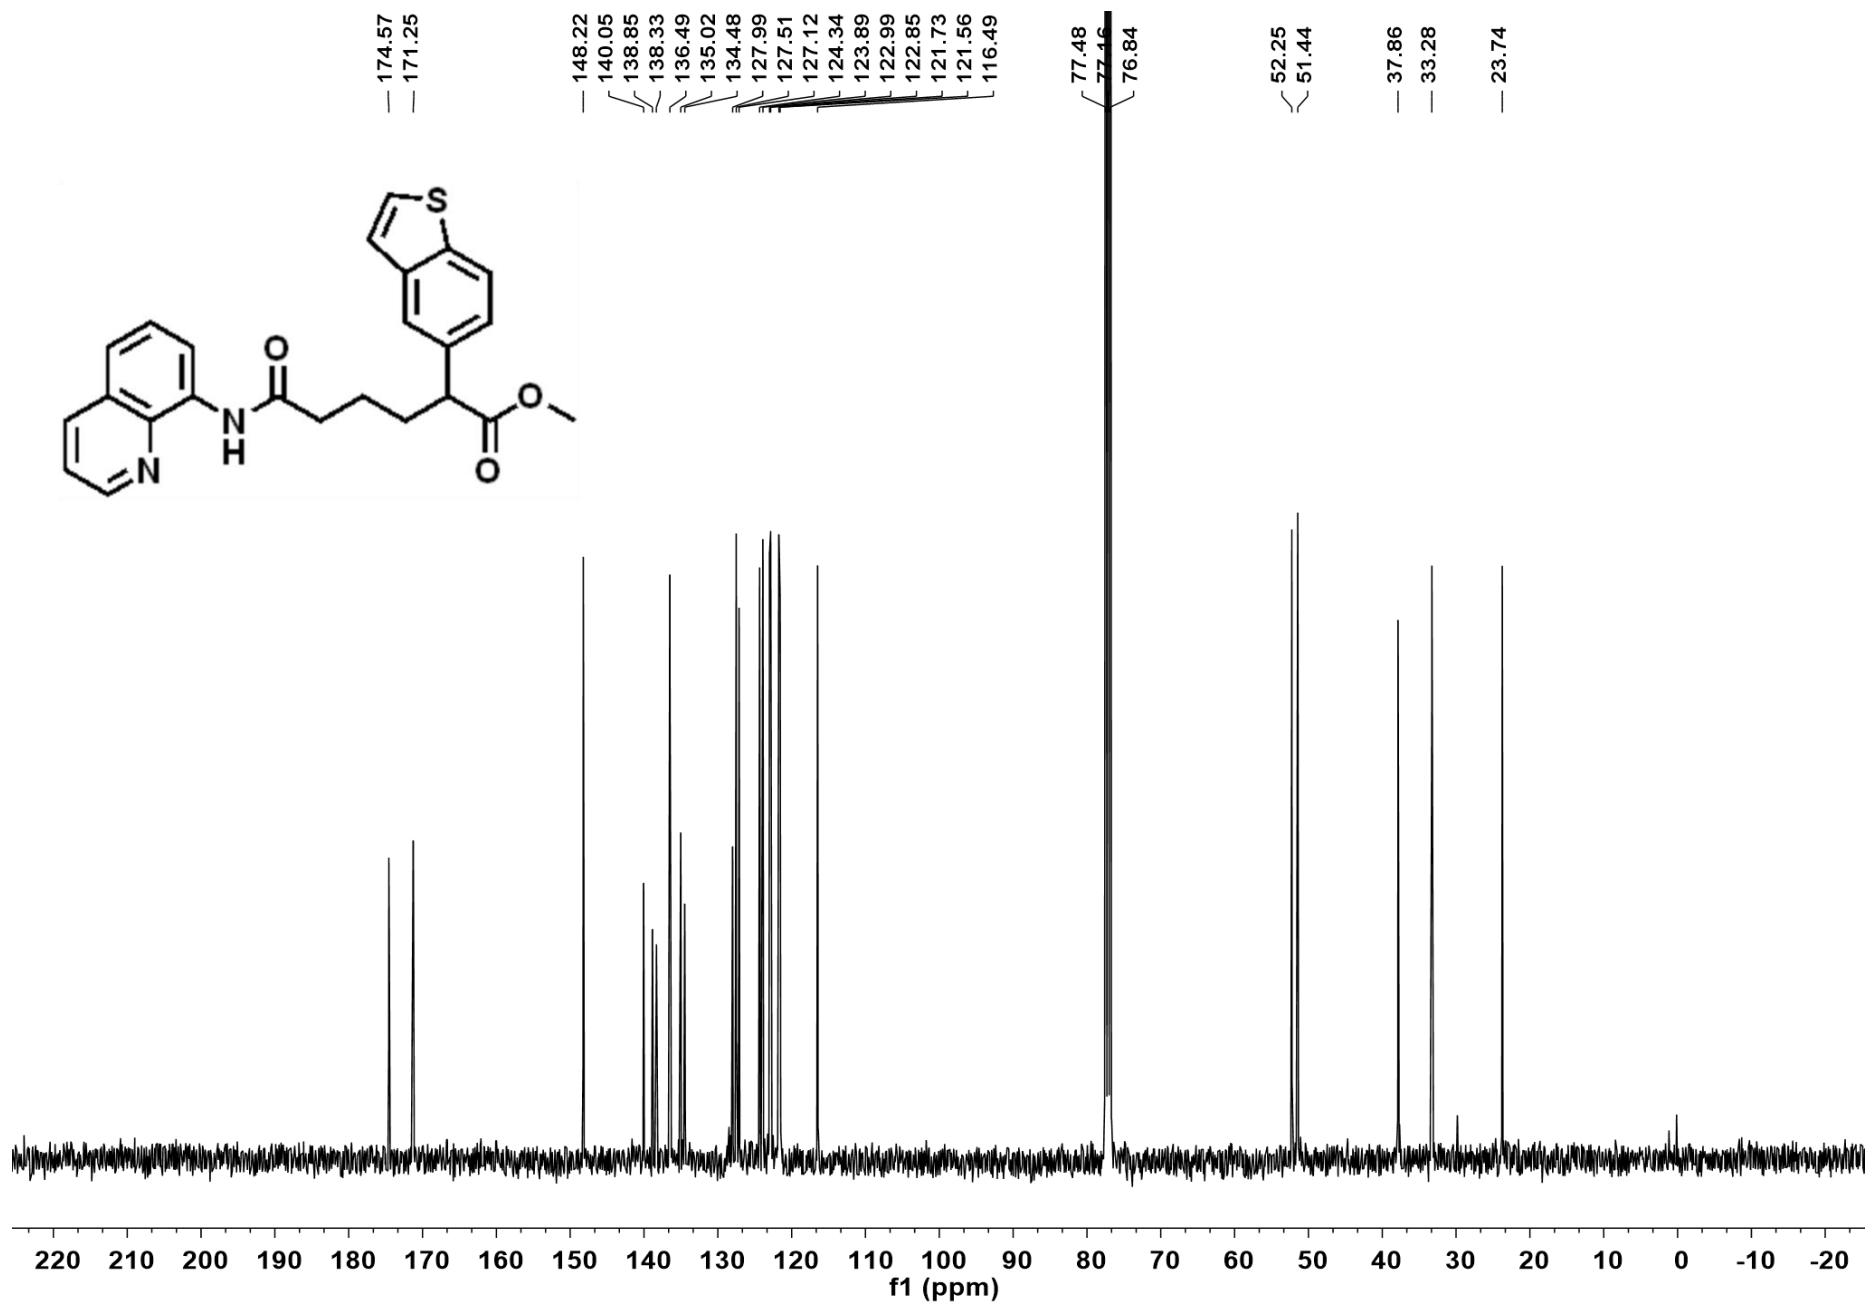



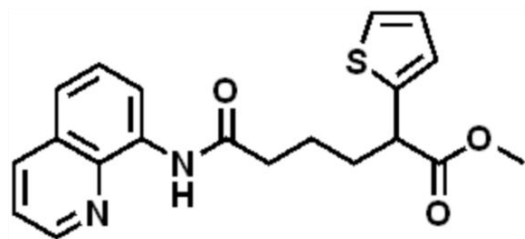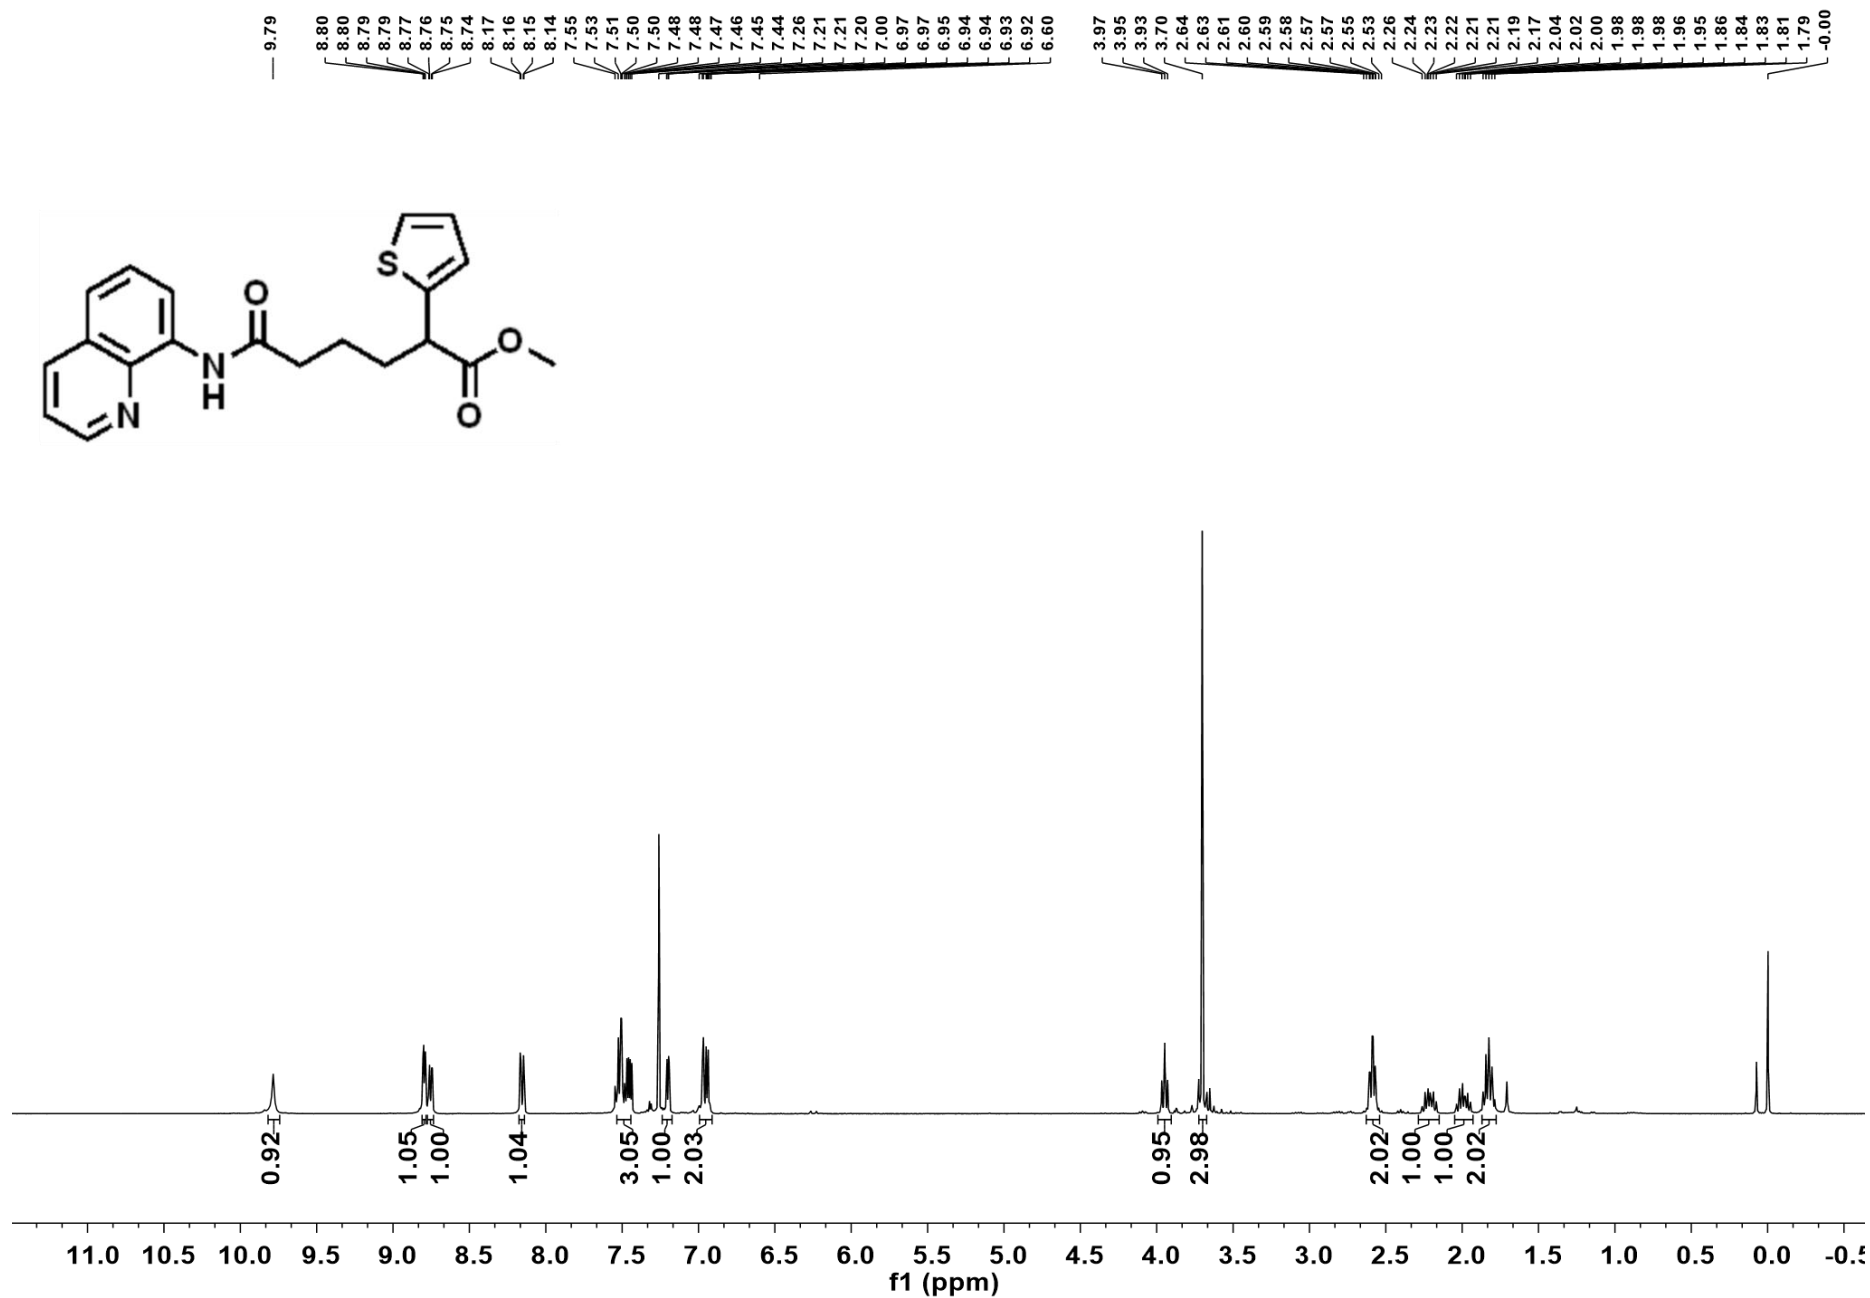

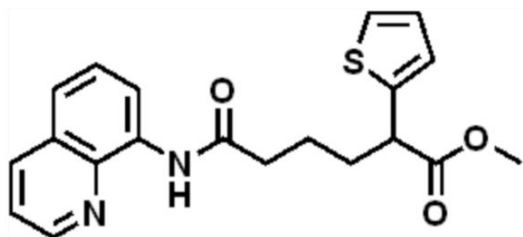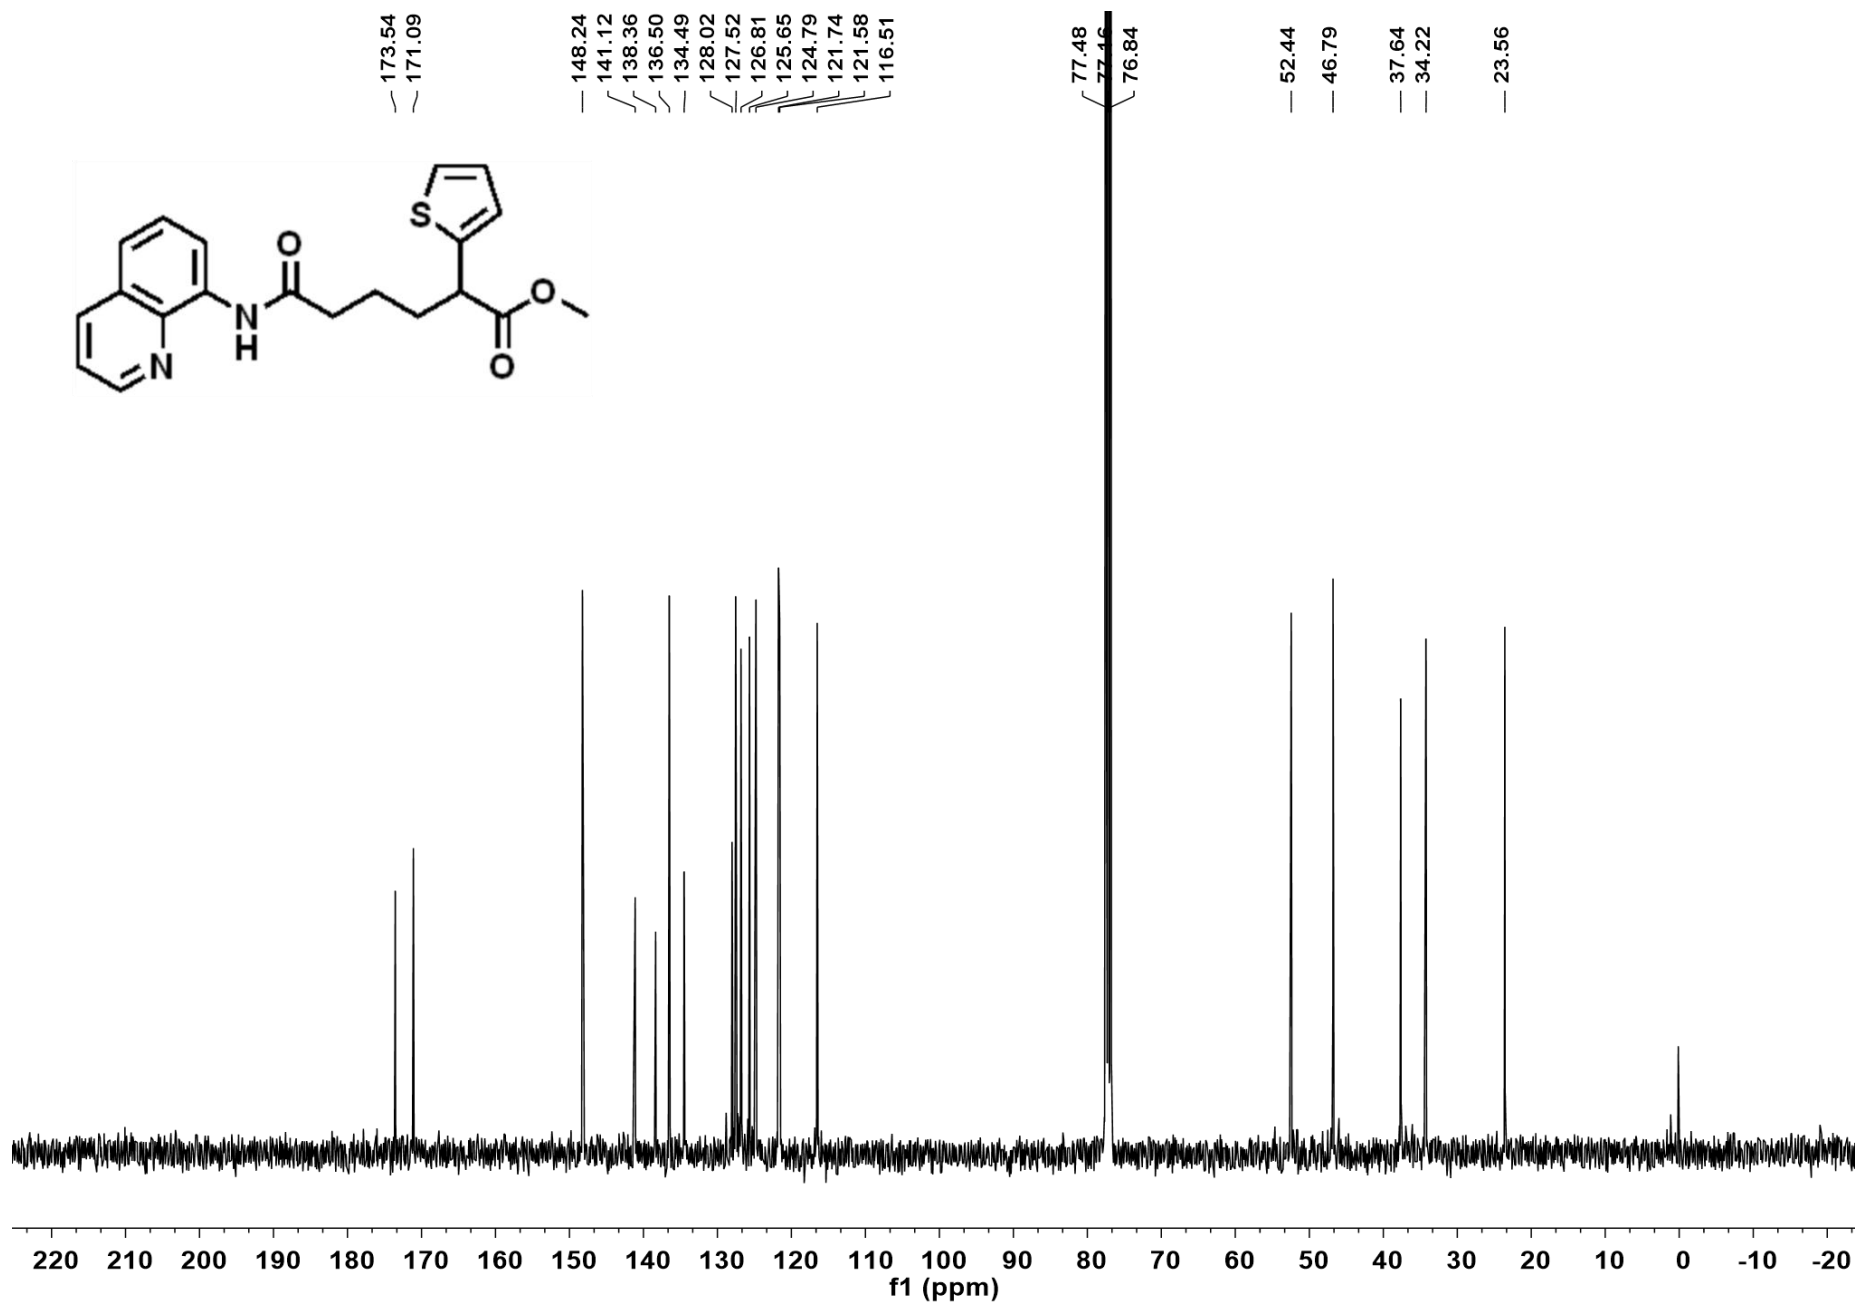

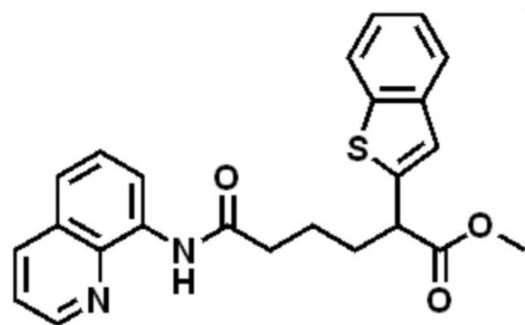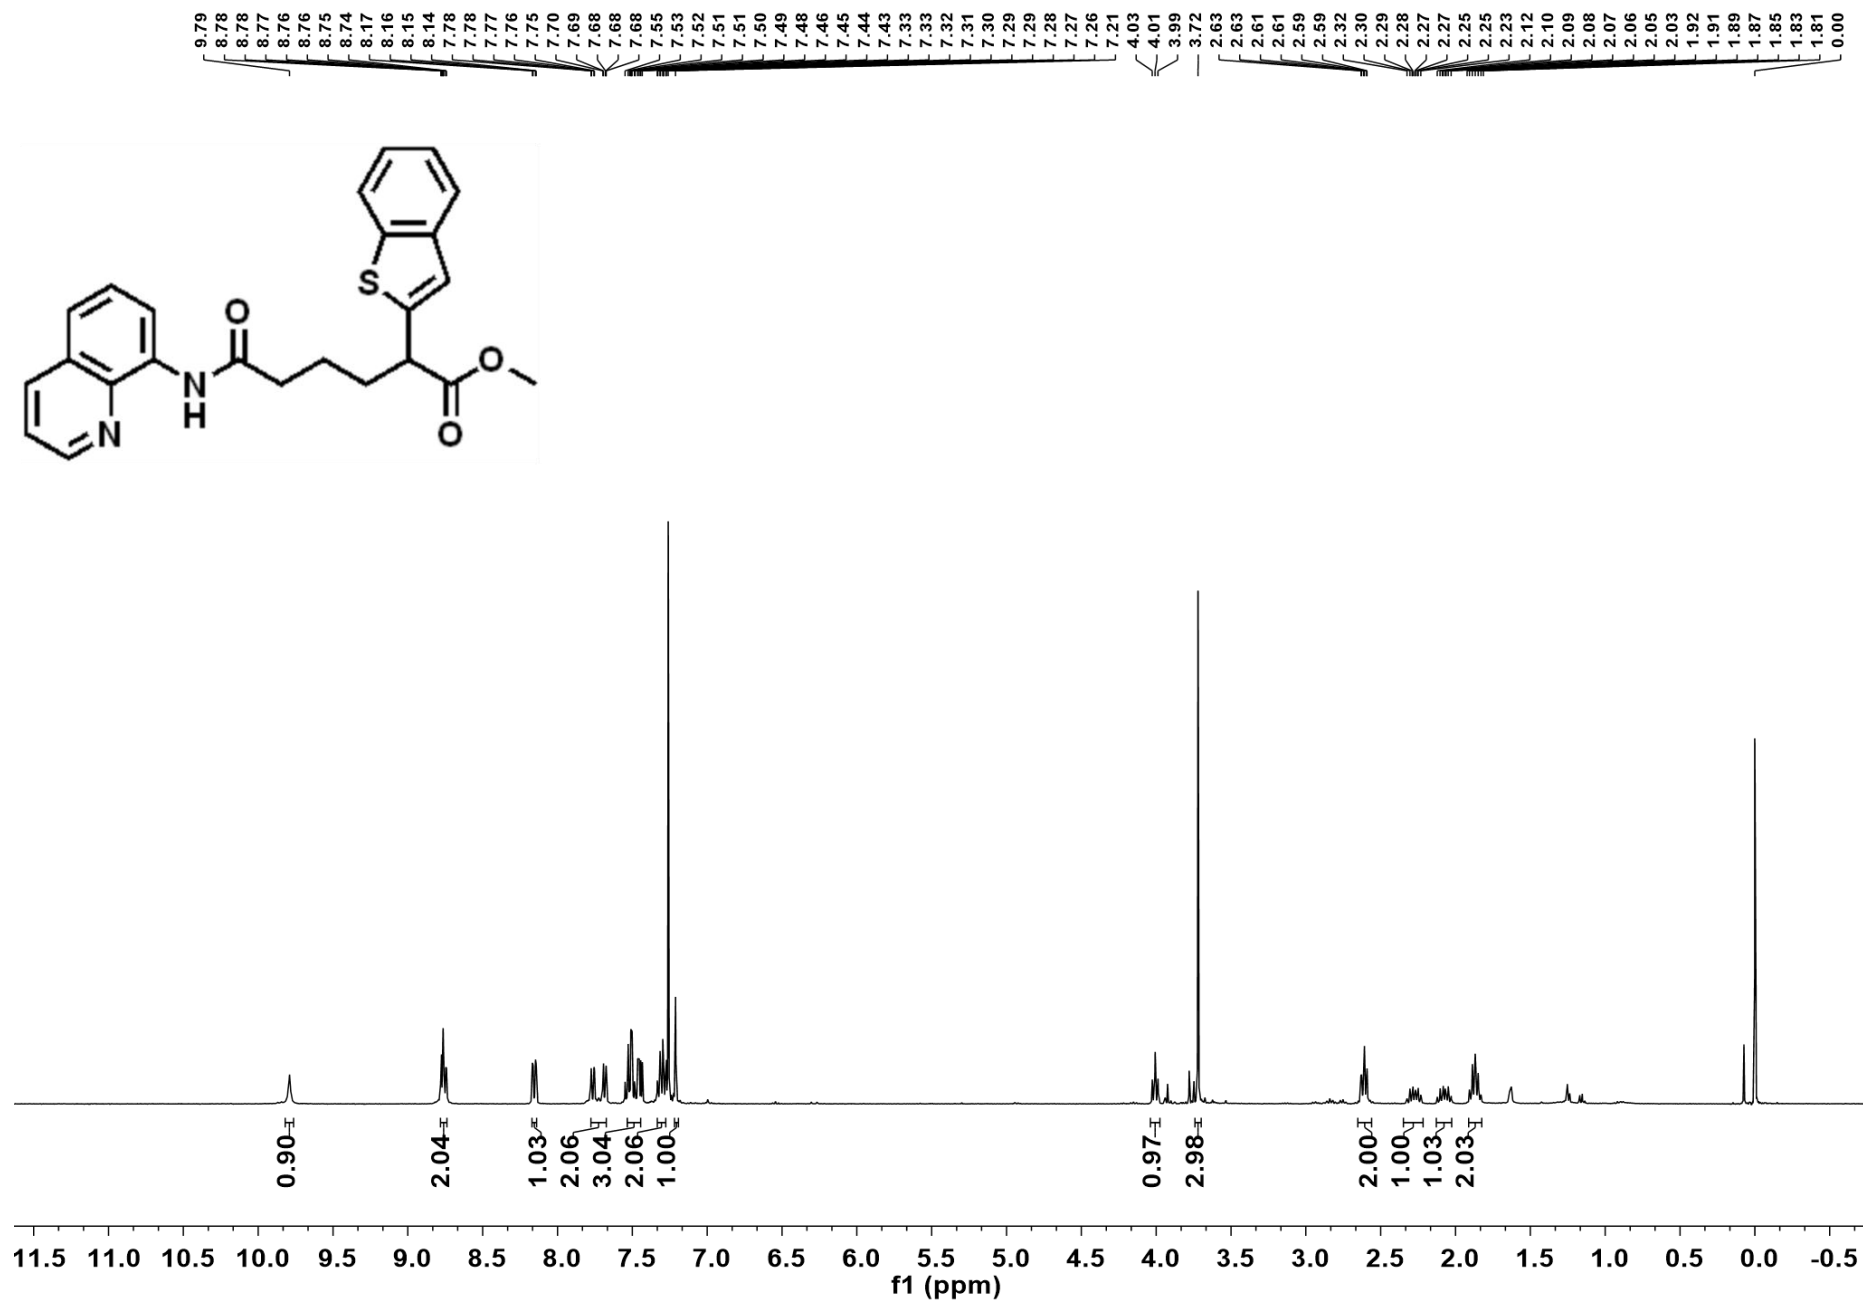

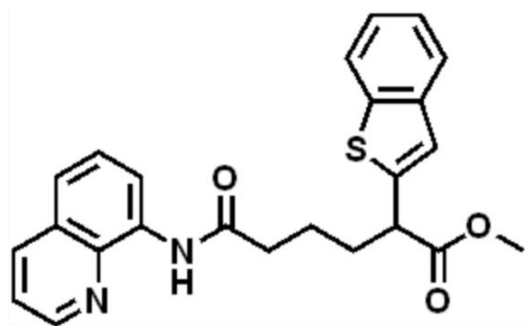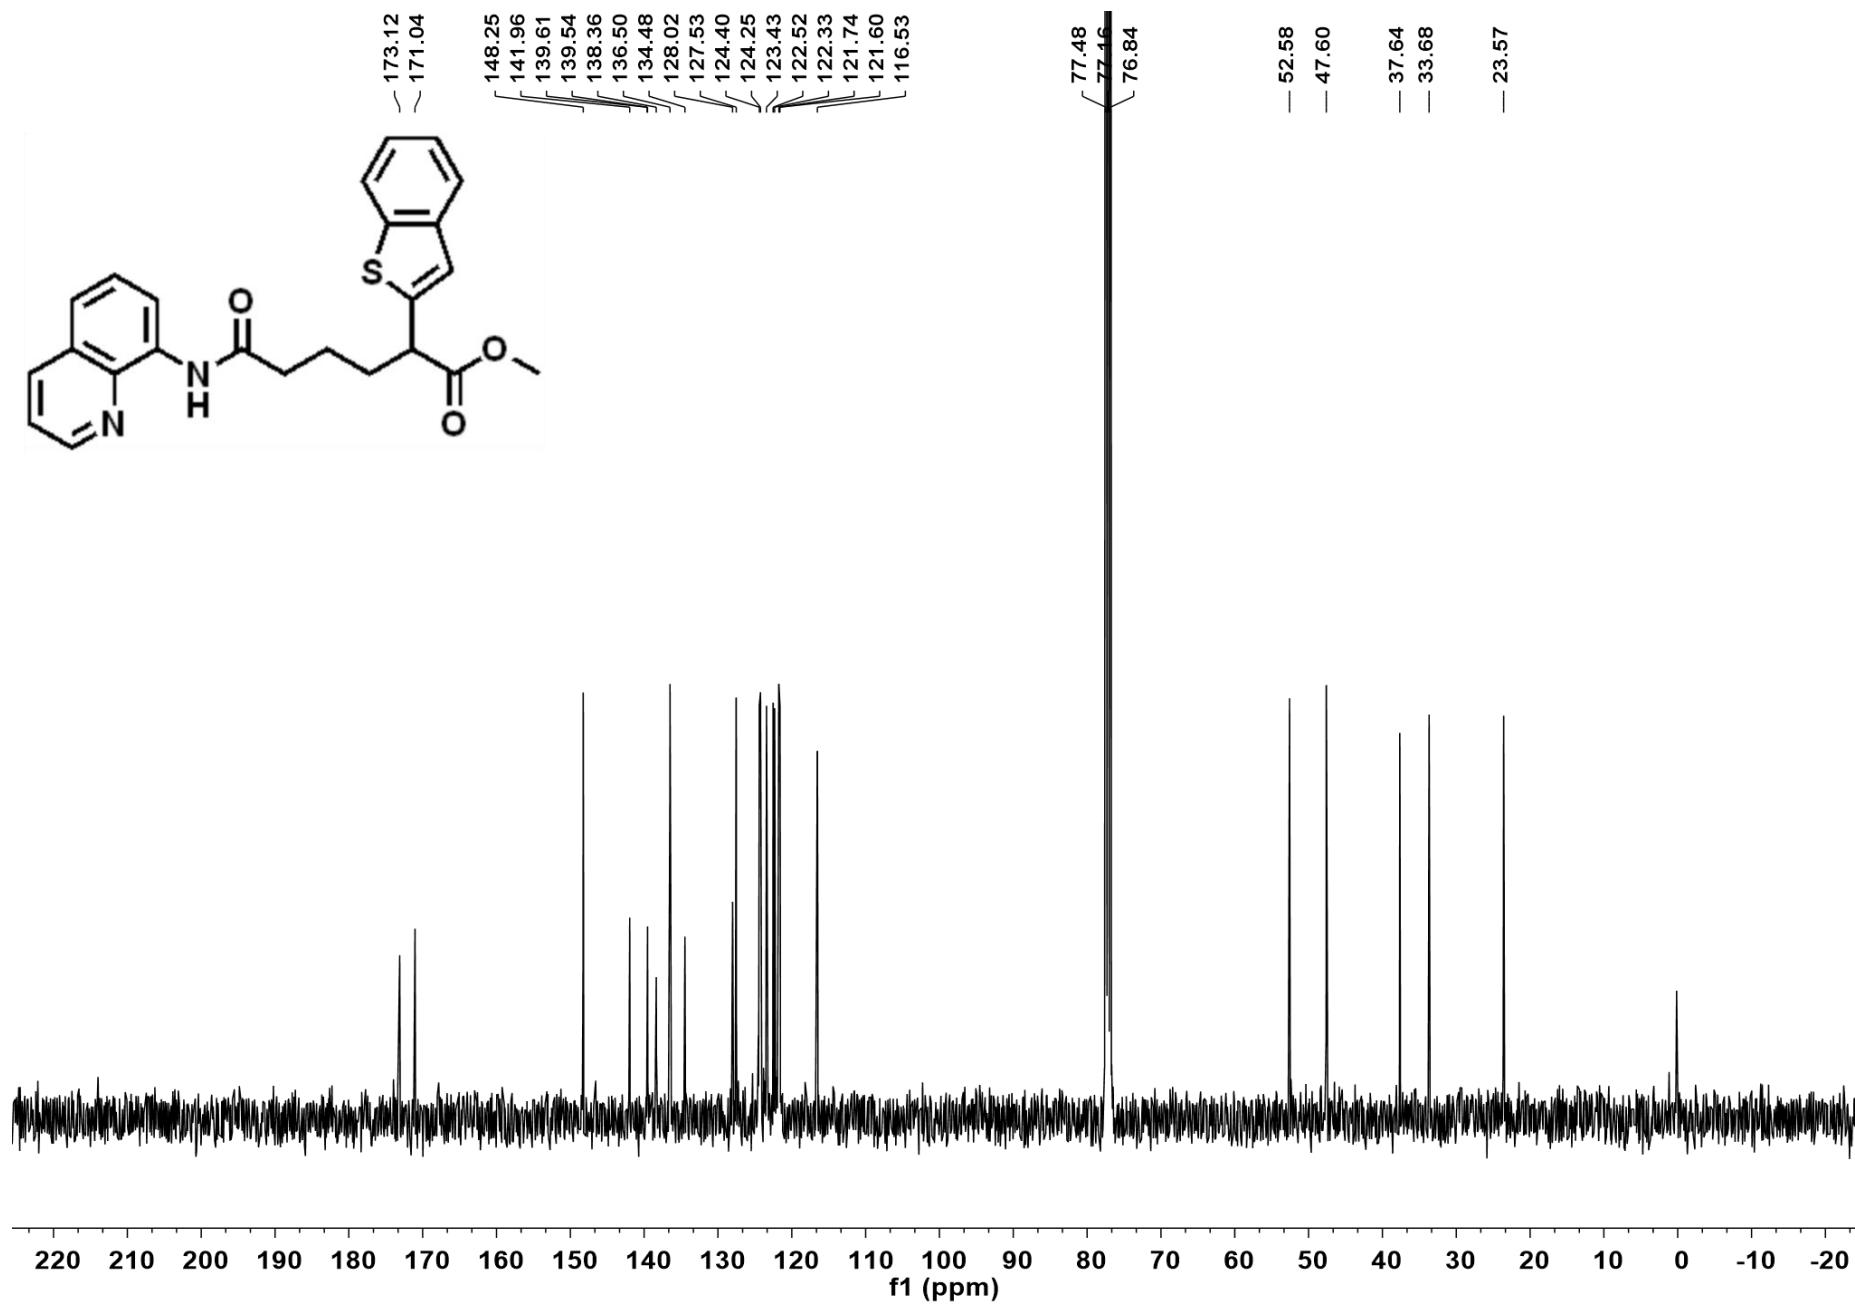

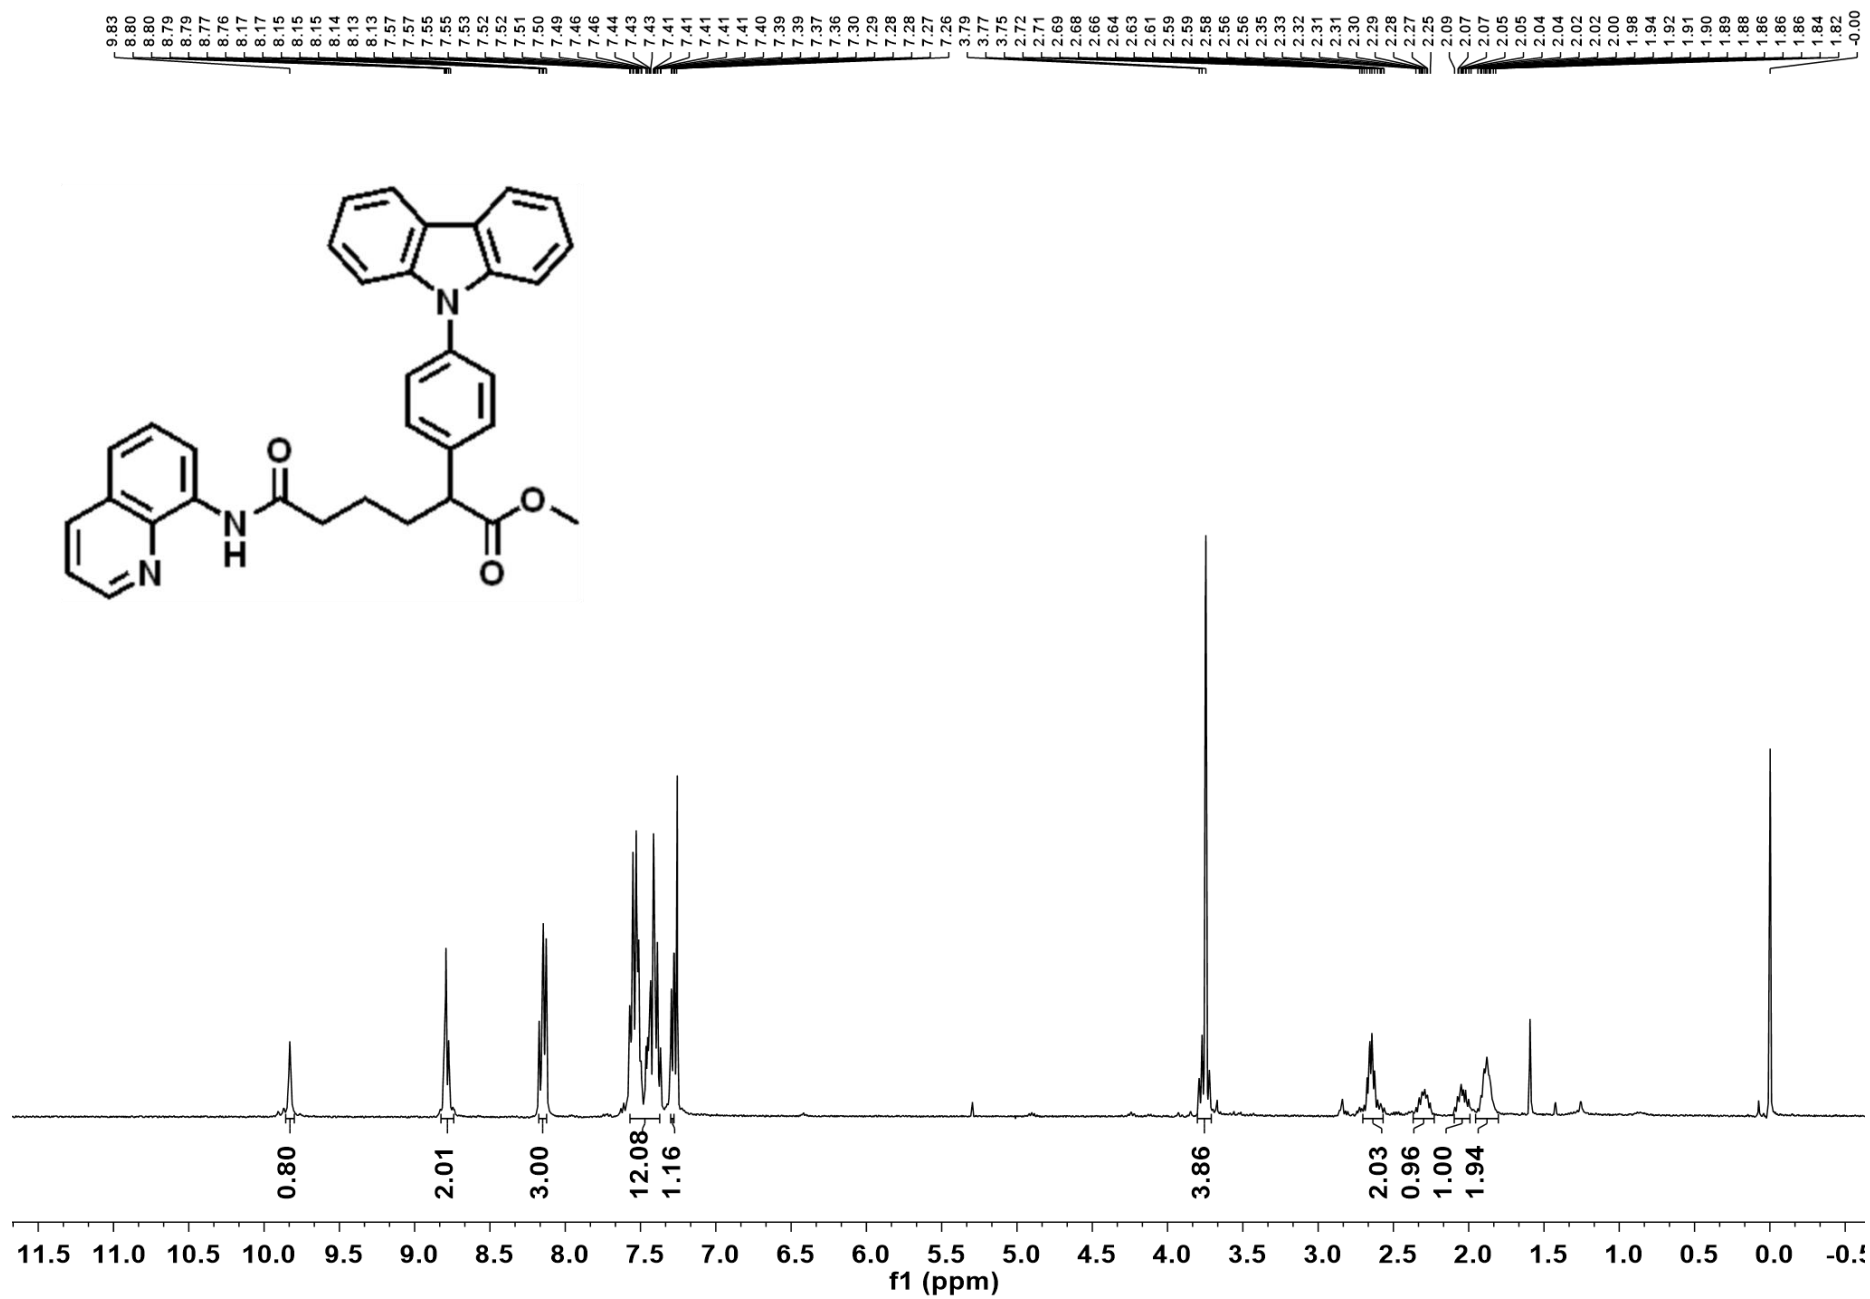

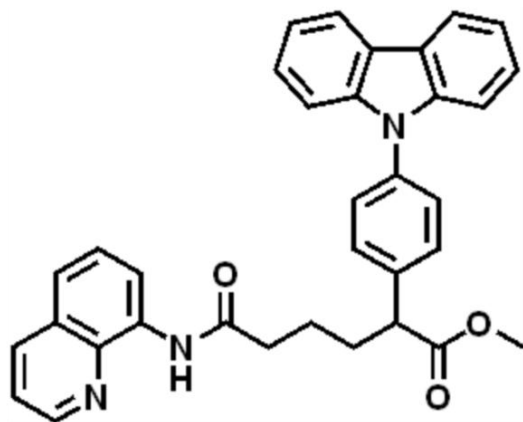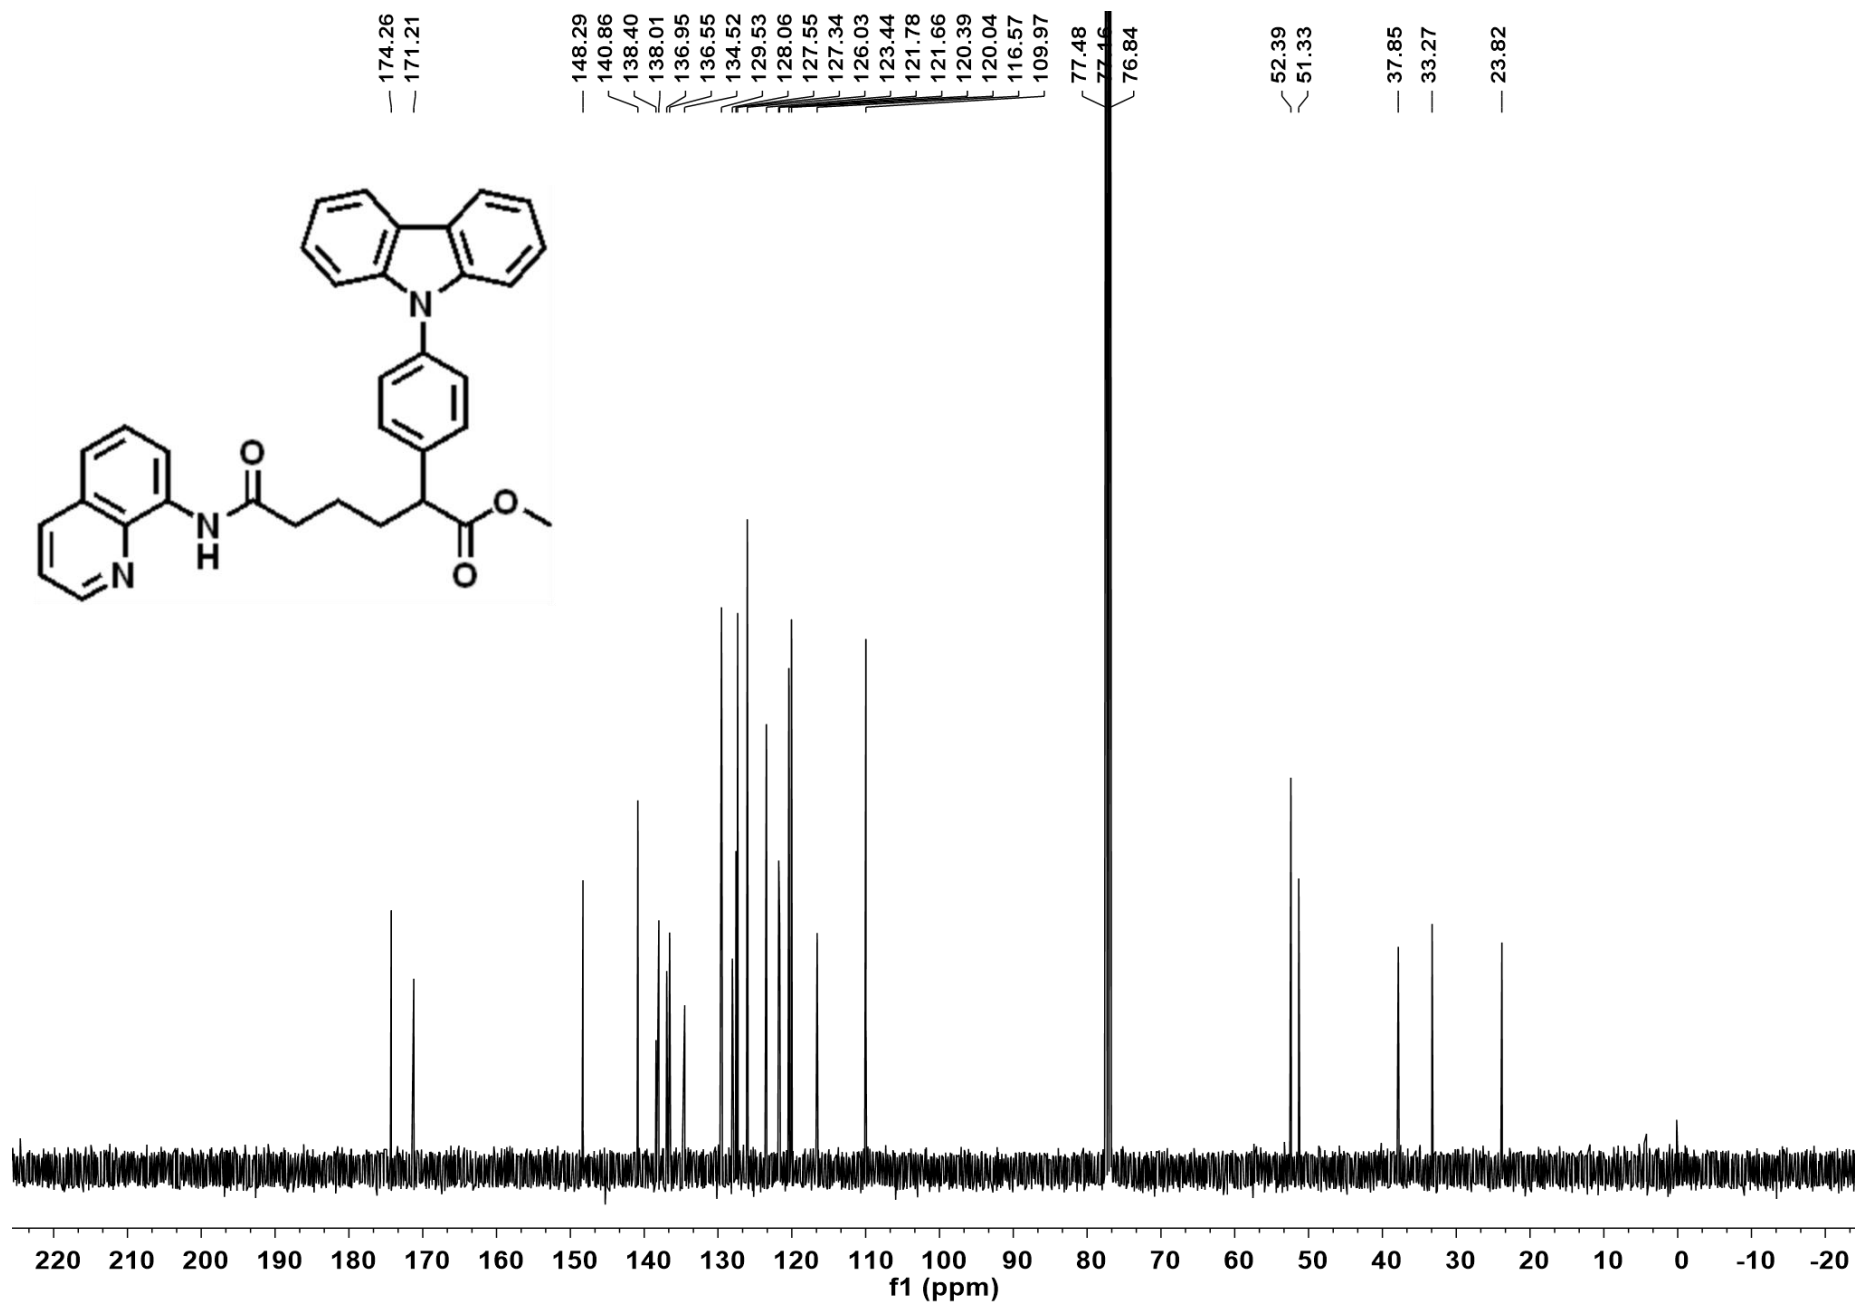

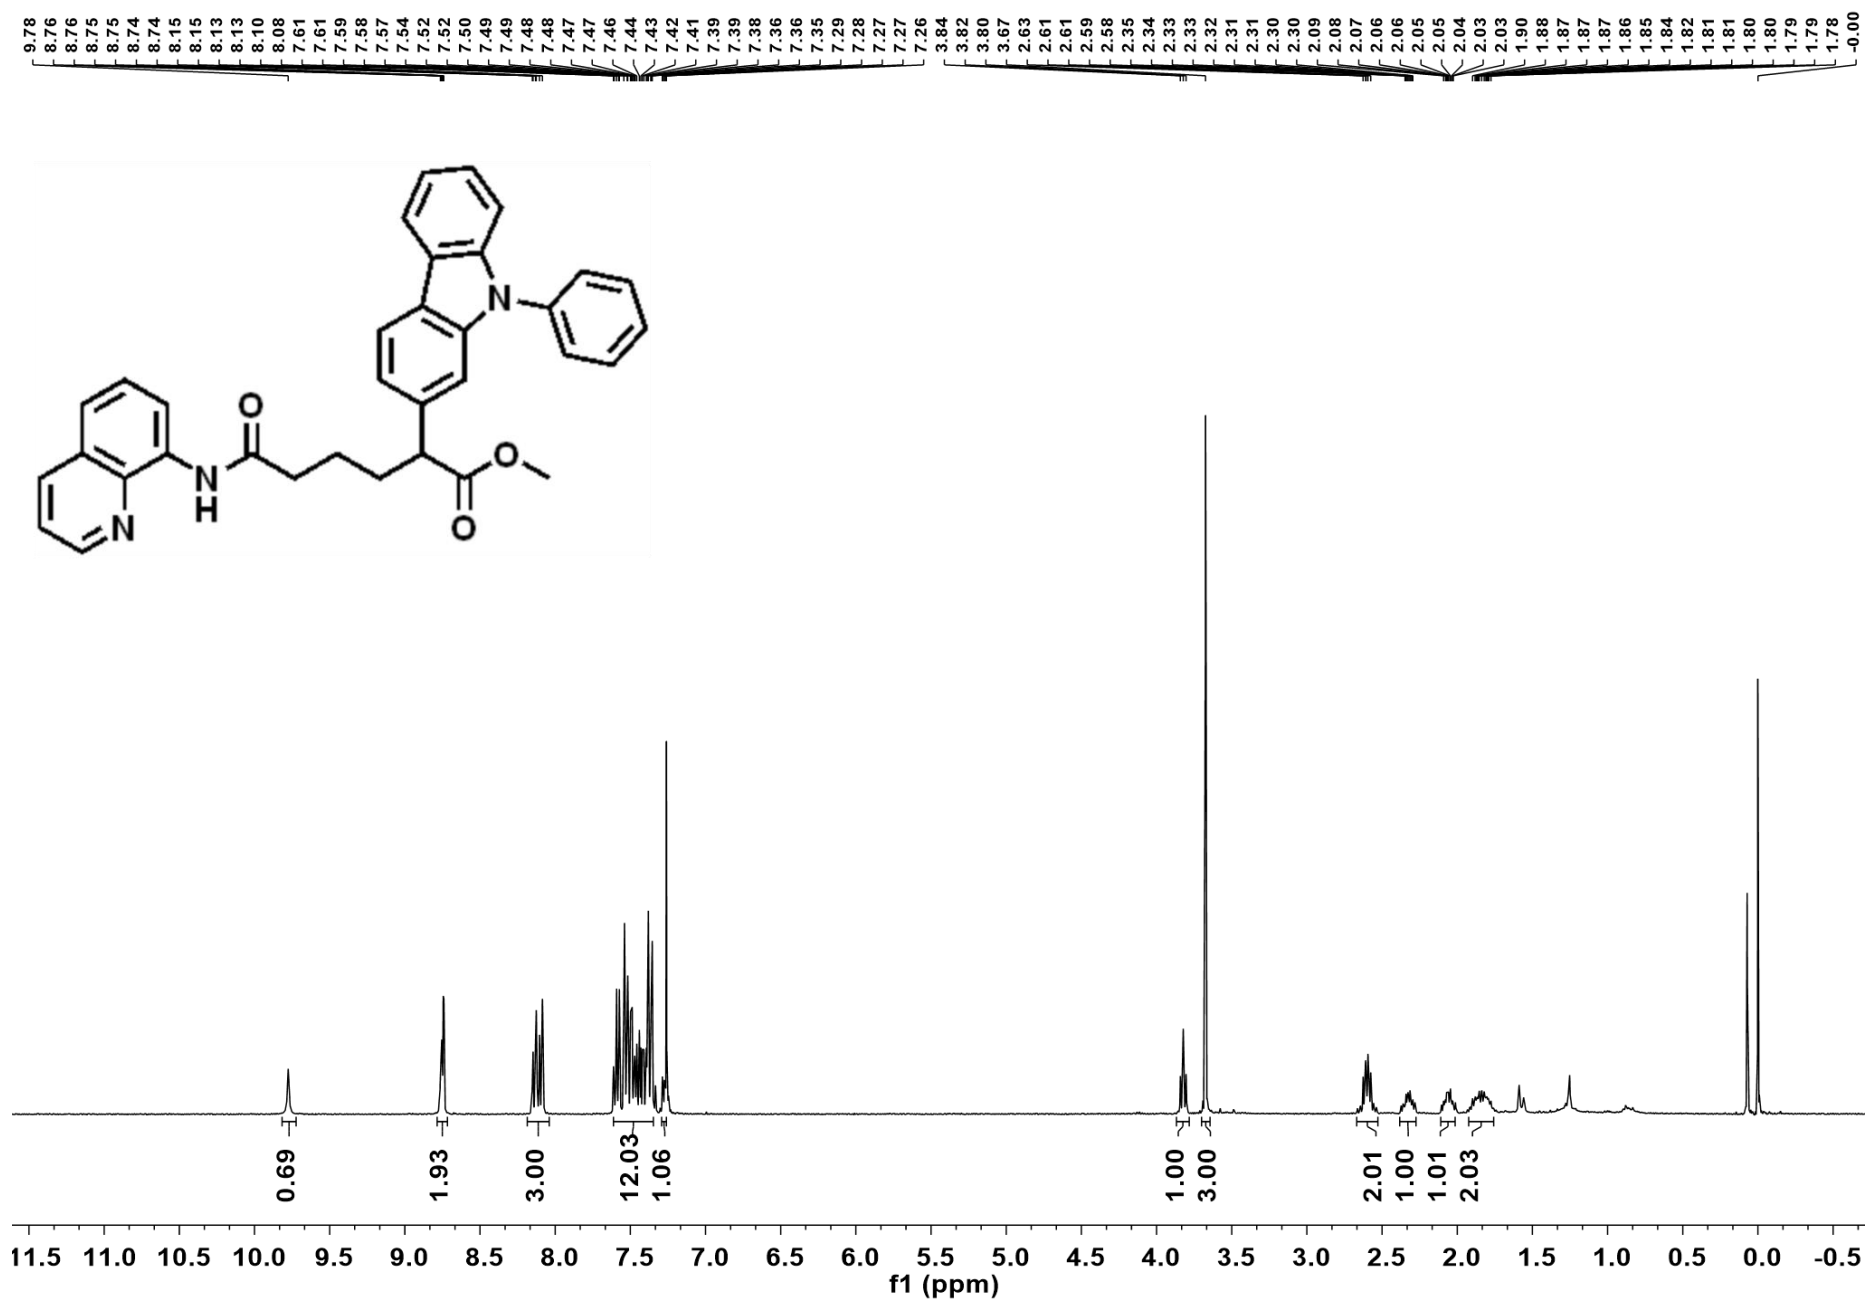

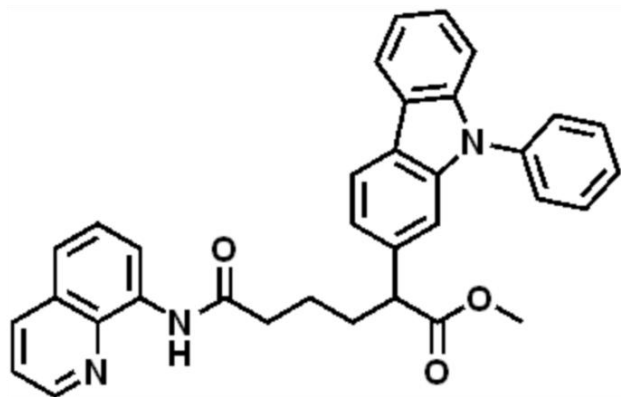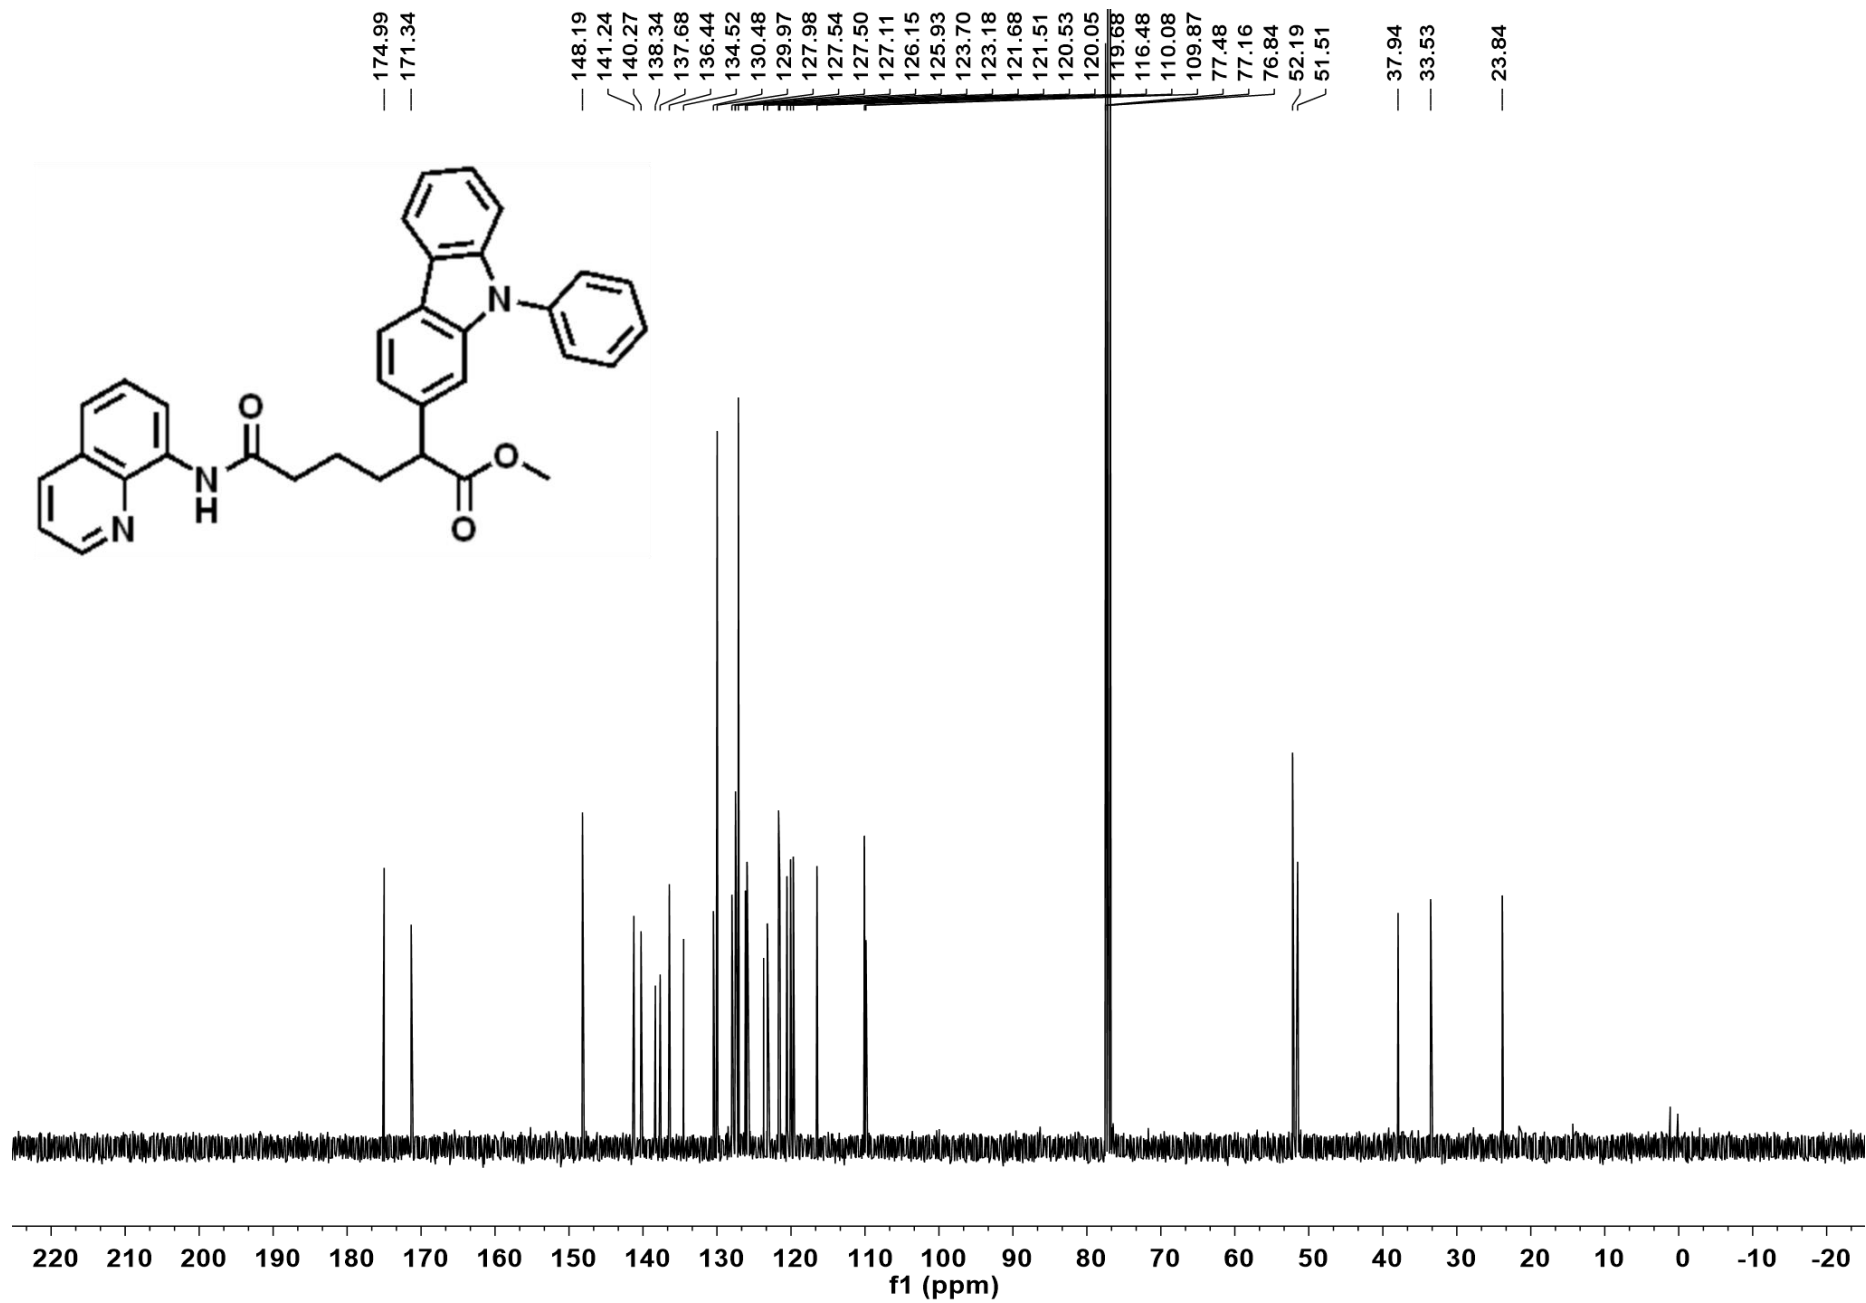



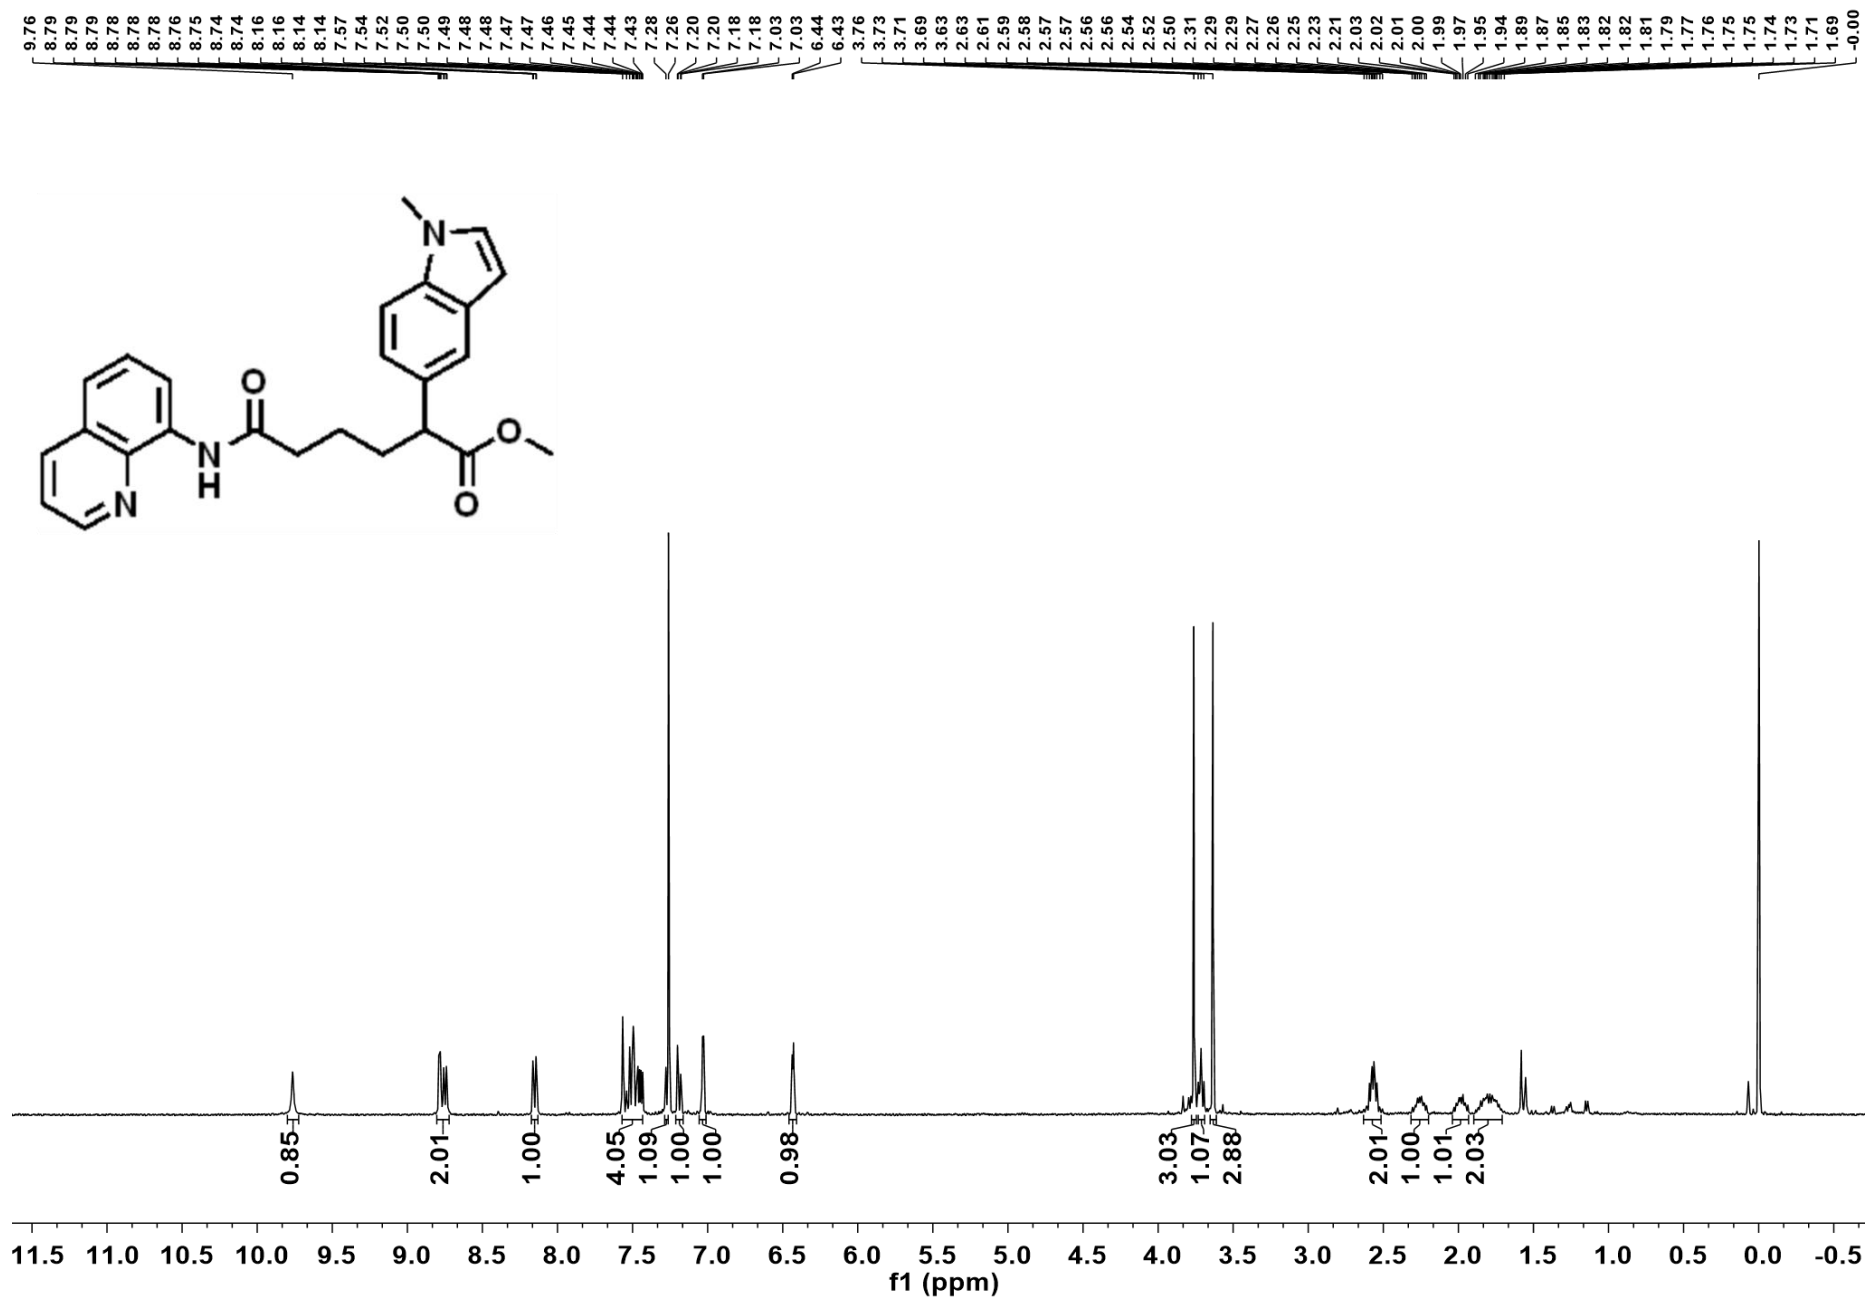

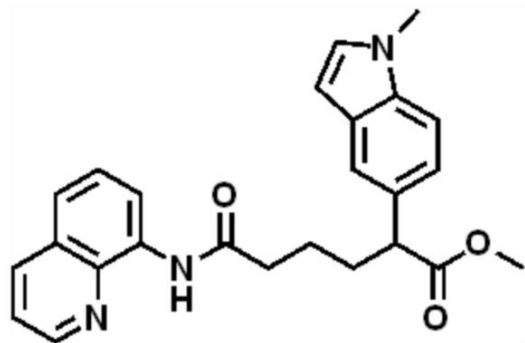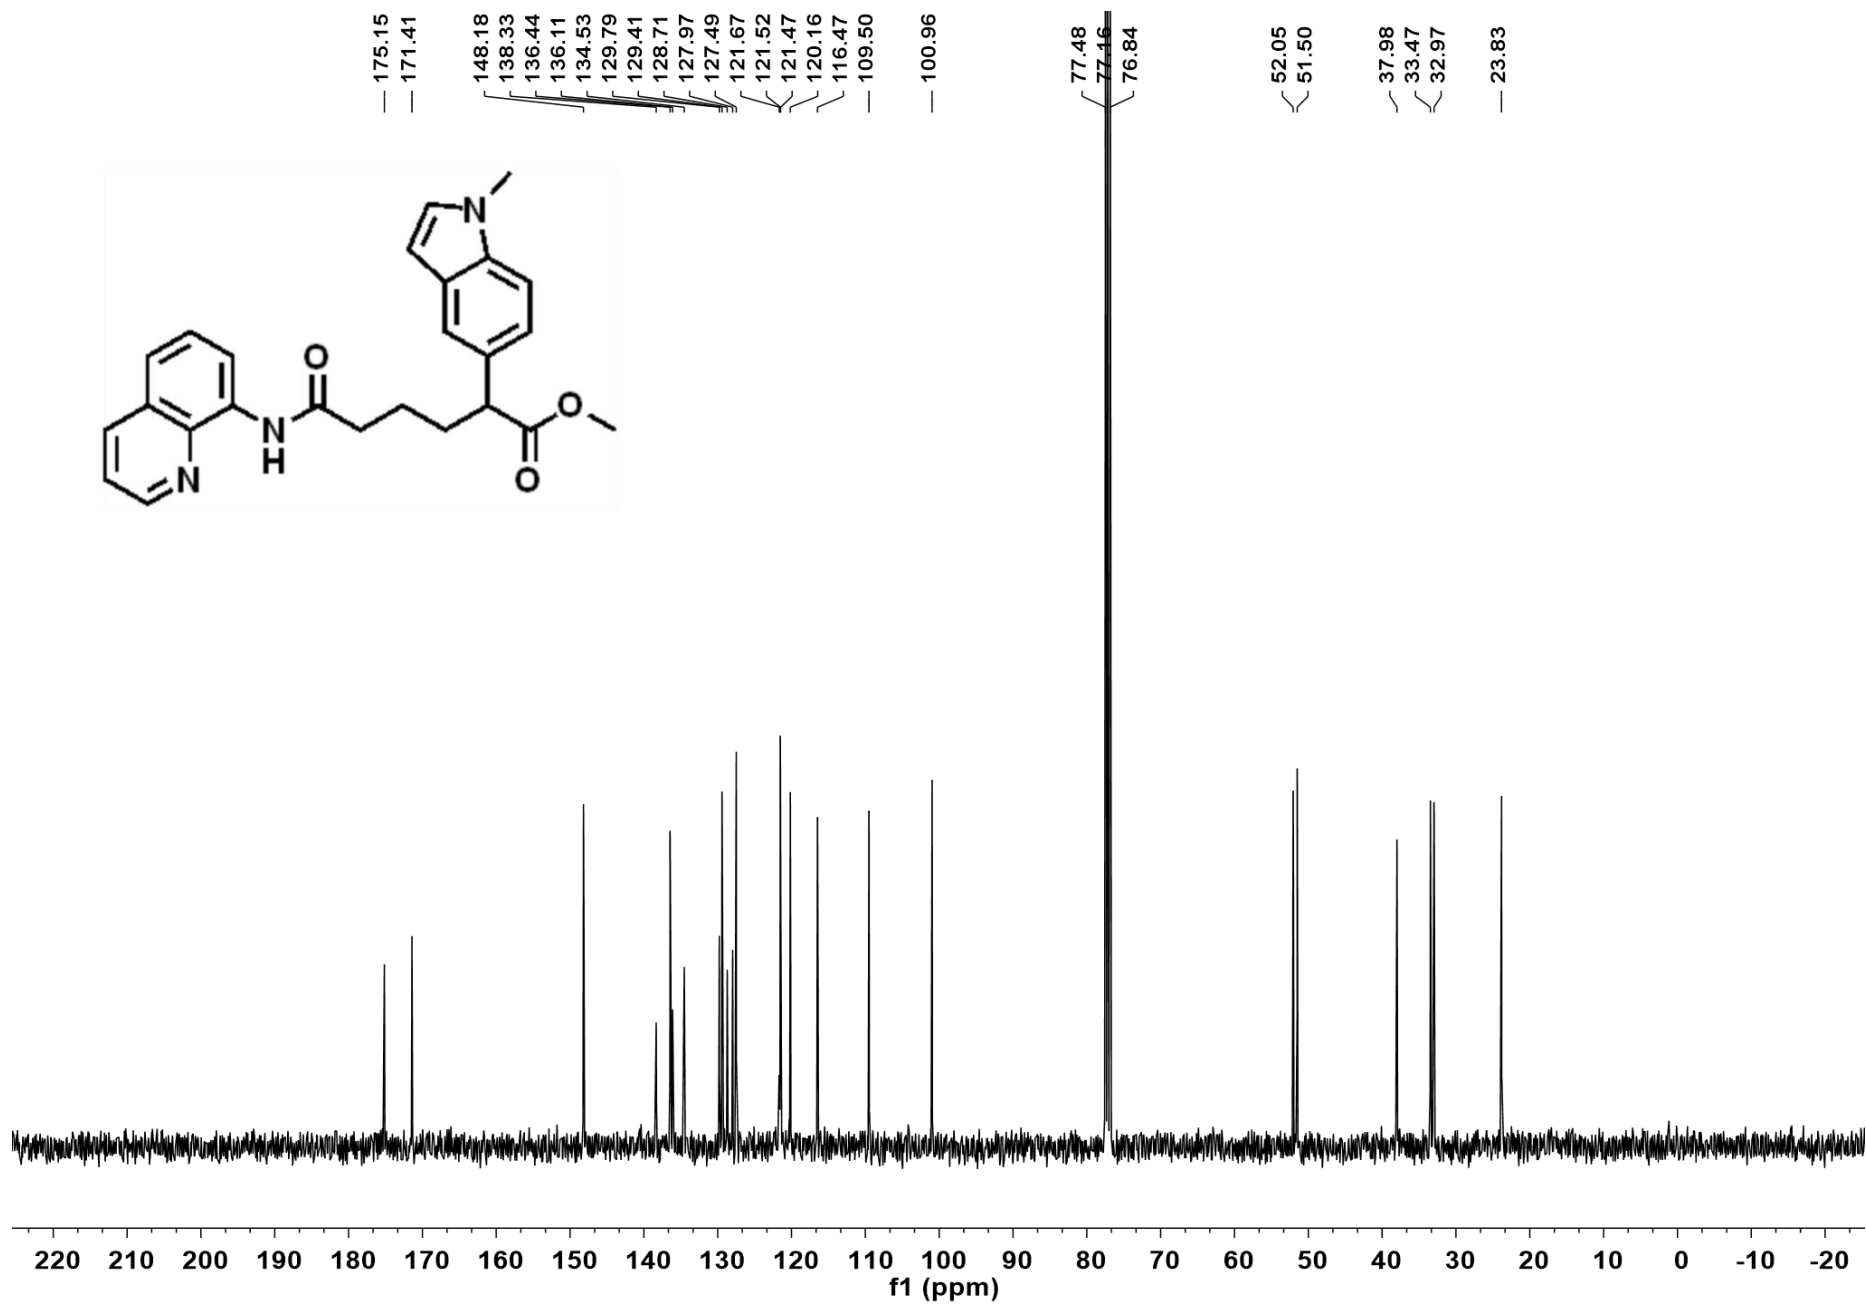

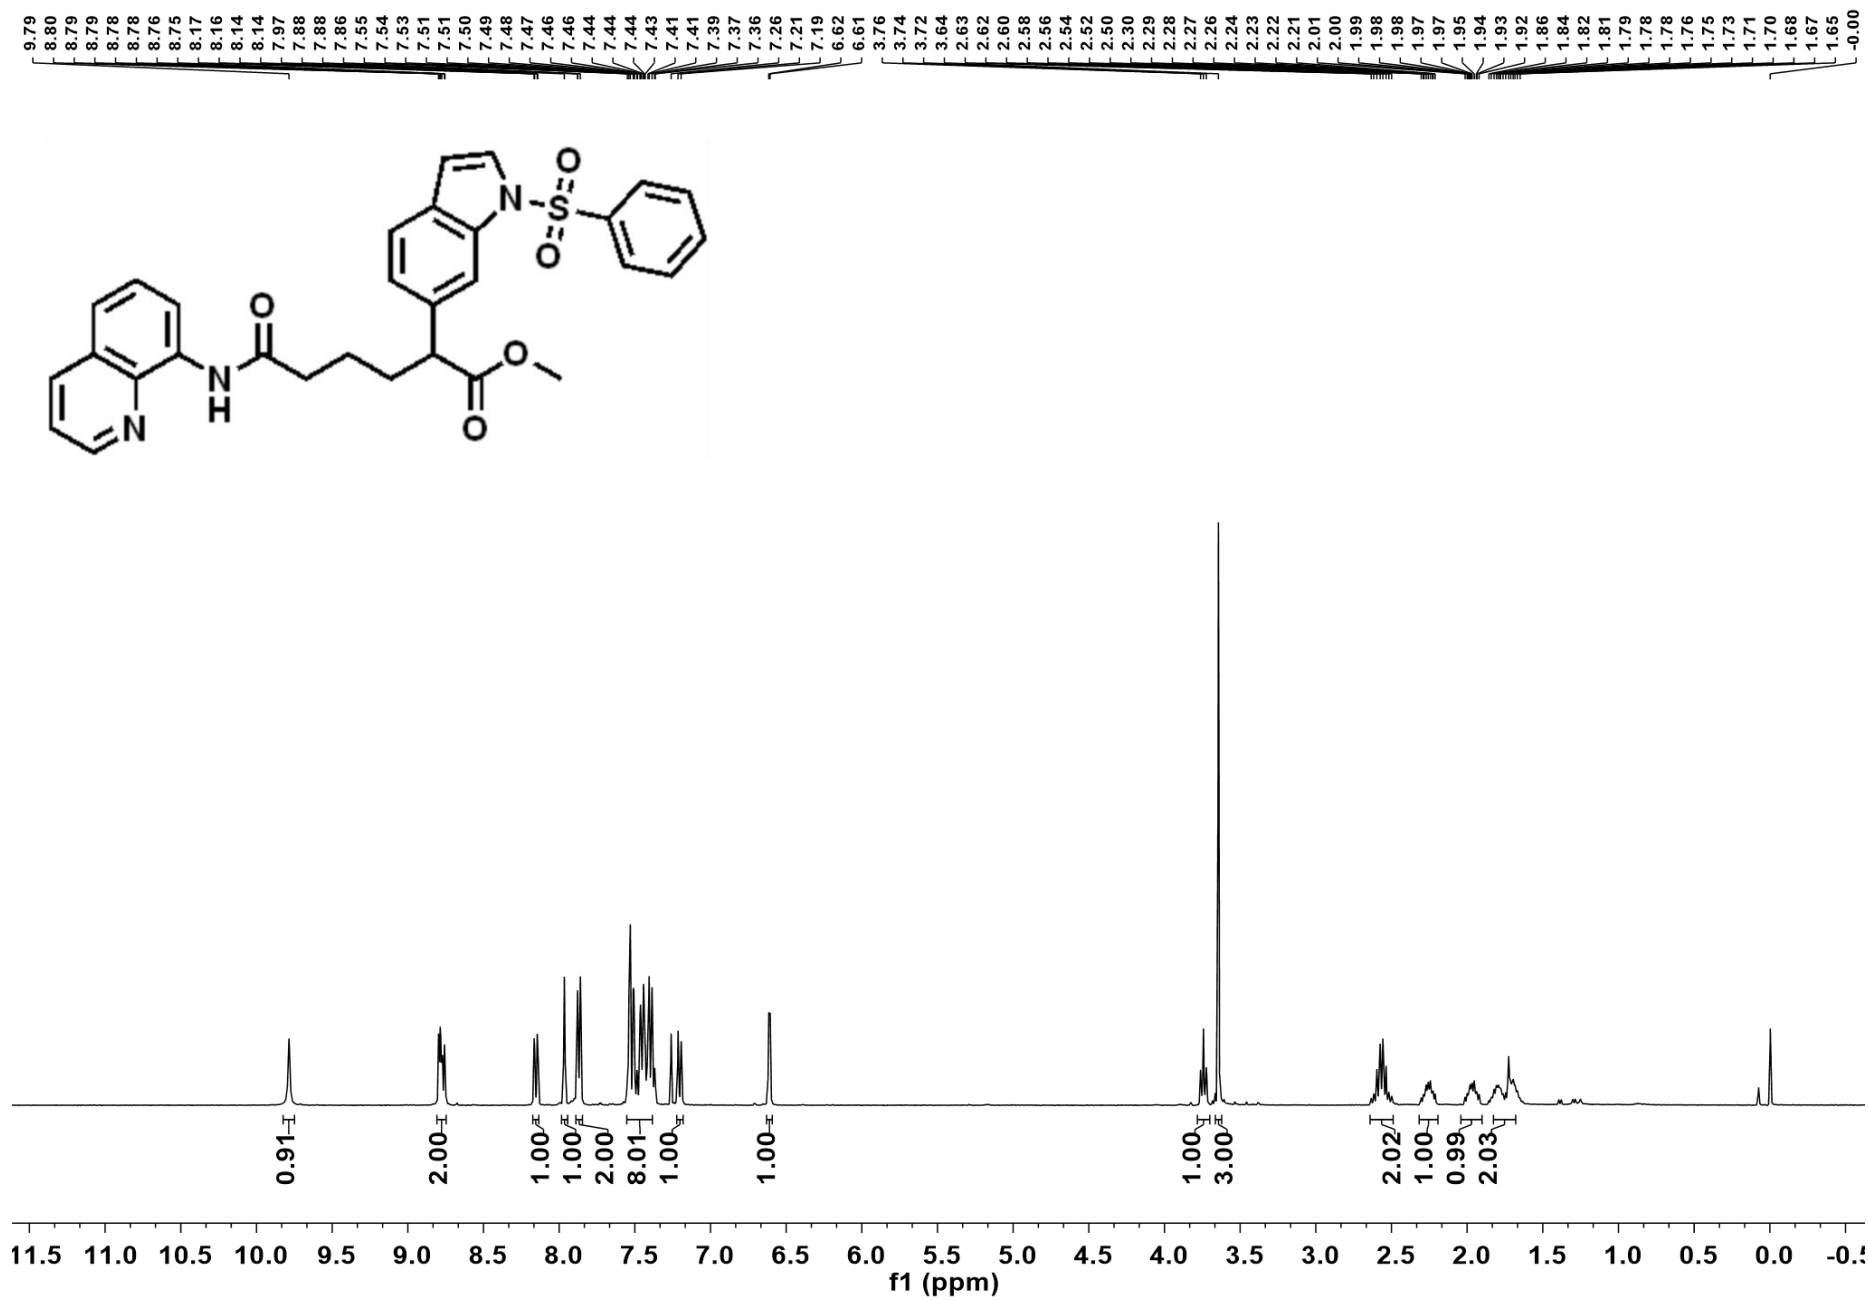

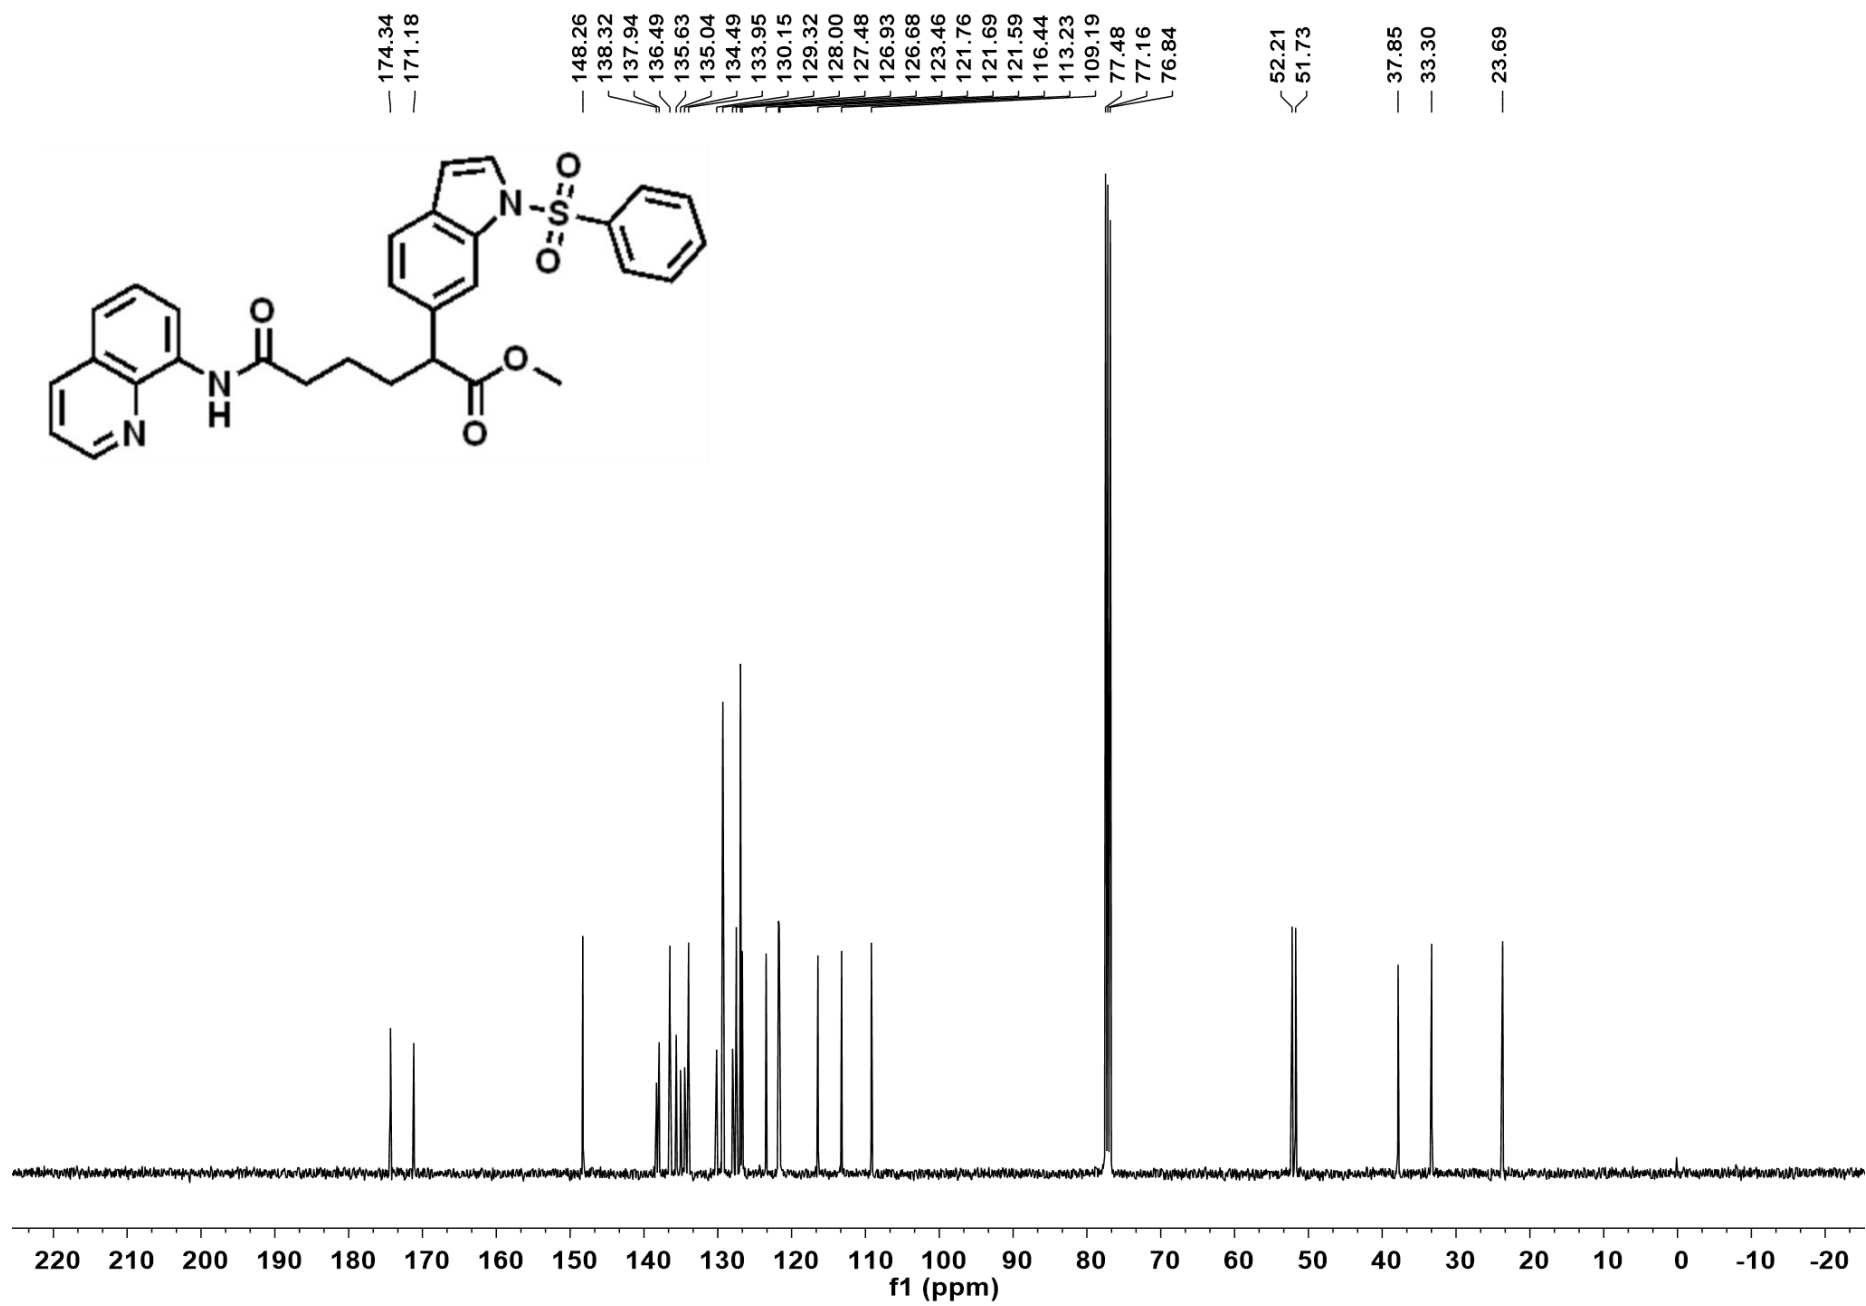

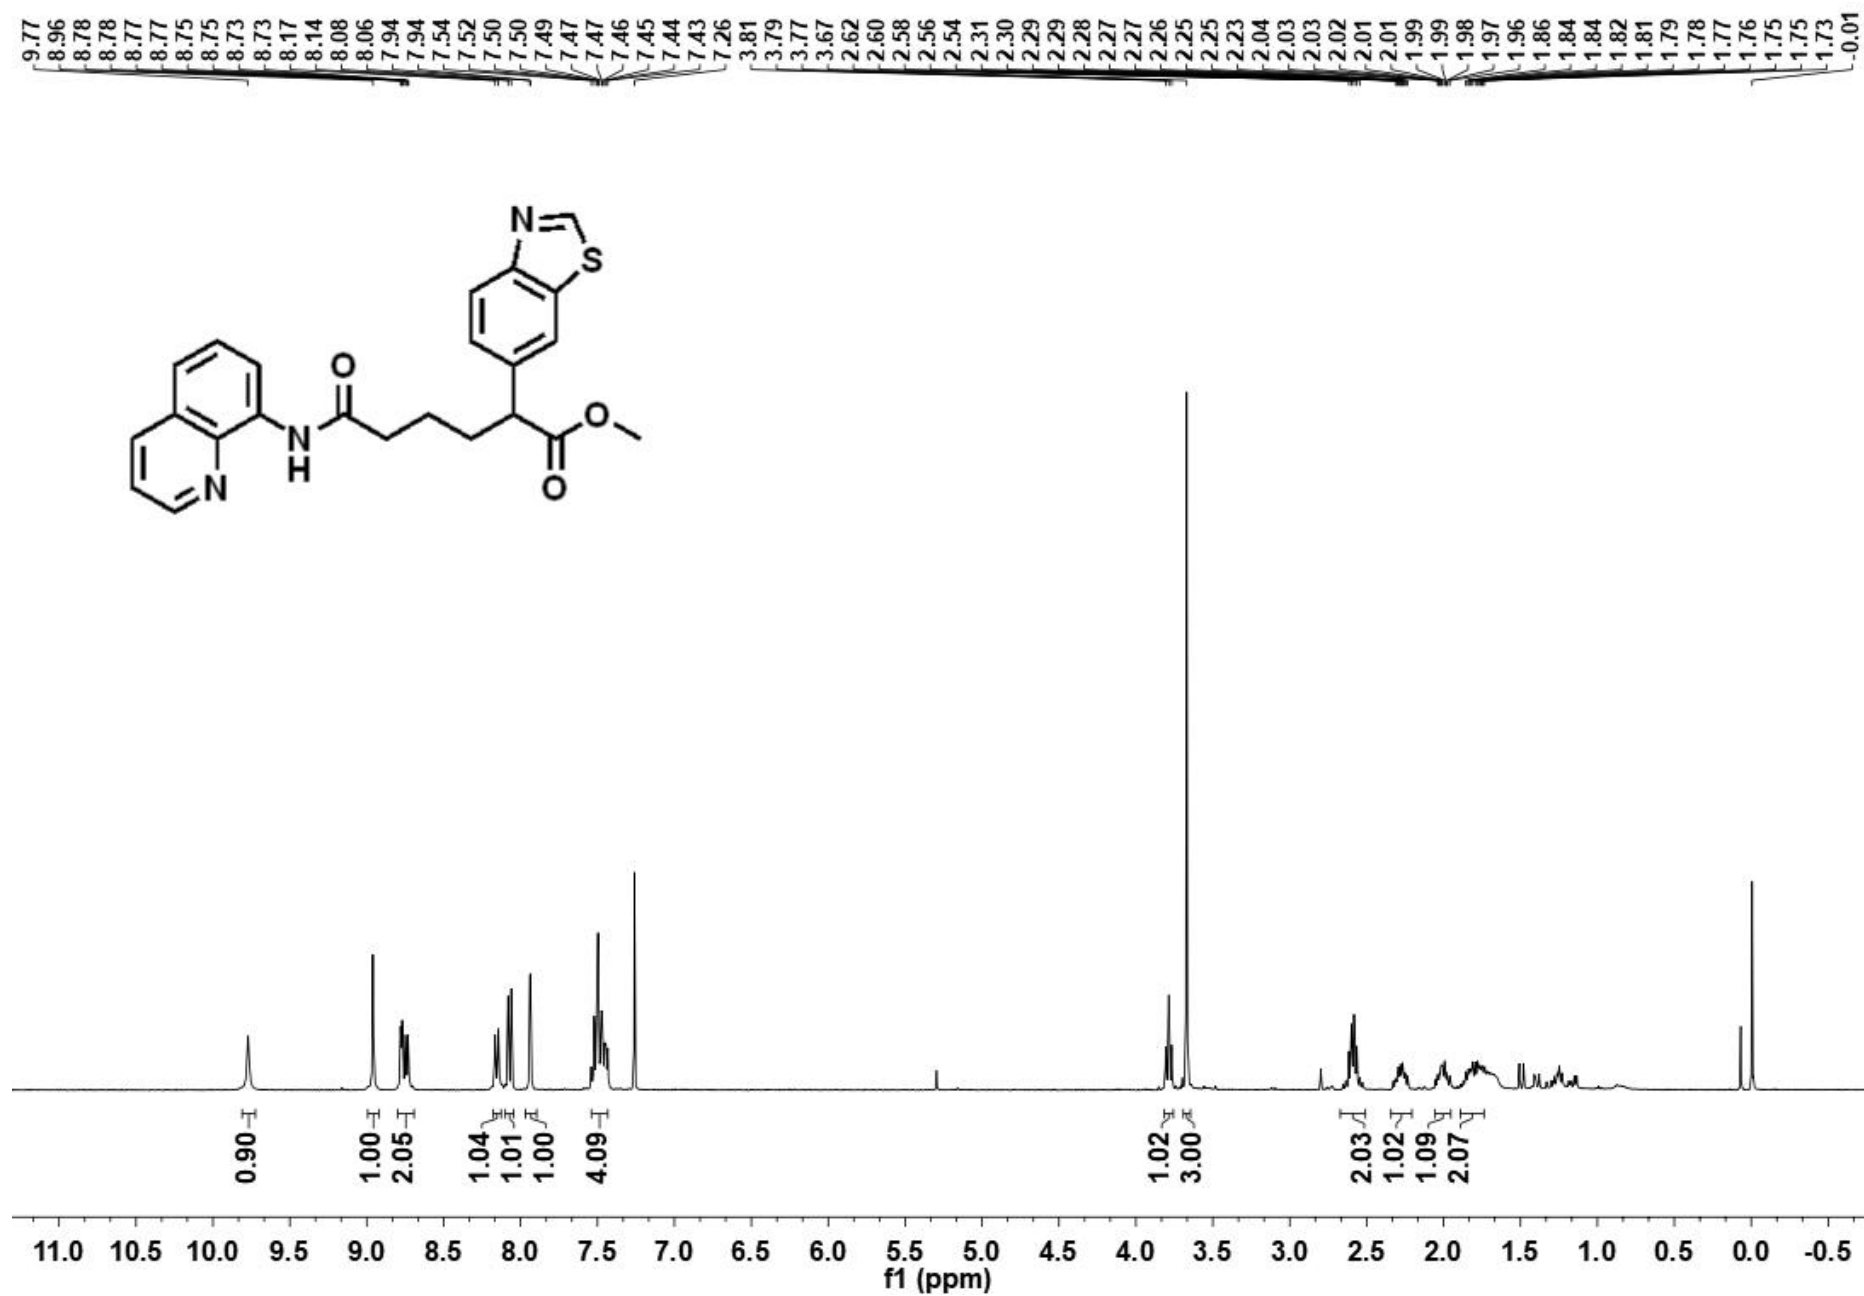

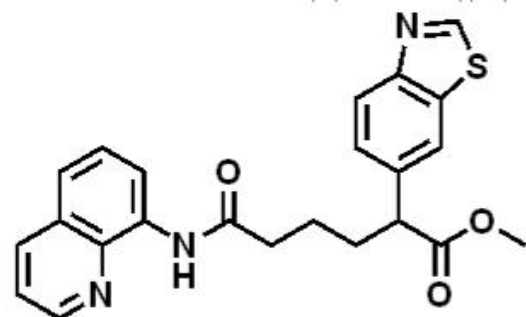

174.16  
171.10

154.25  
152.71

148.22  
138.32

136.57  
136.51

134.44  
128.01

127.51  
126.53

123.79  
121.73

121.60  
121.19

116.52

77.48  
77.16  
76.84

52.35  
51.46

37.74  
33.32

23.69

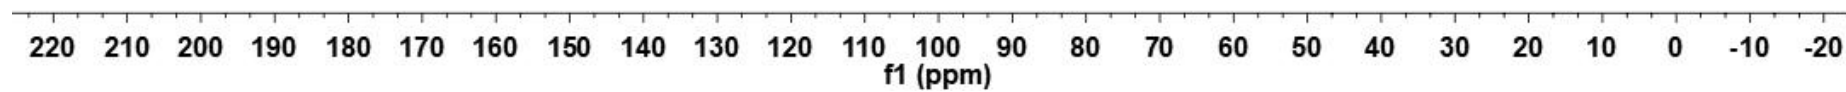

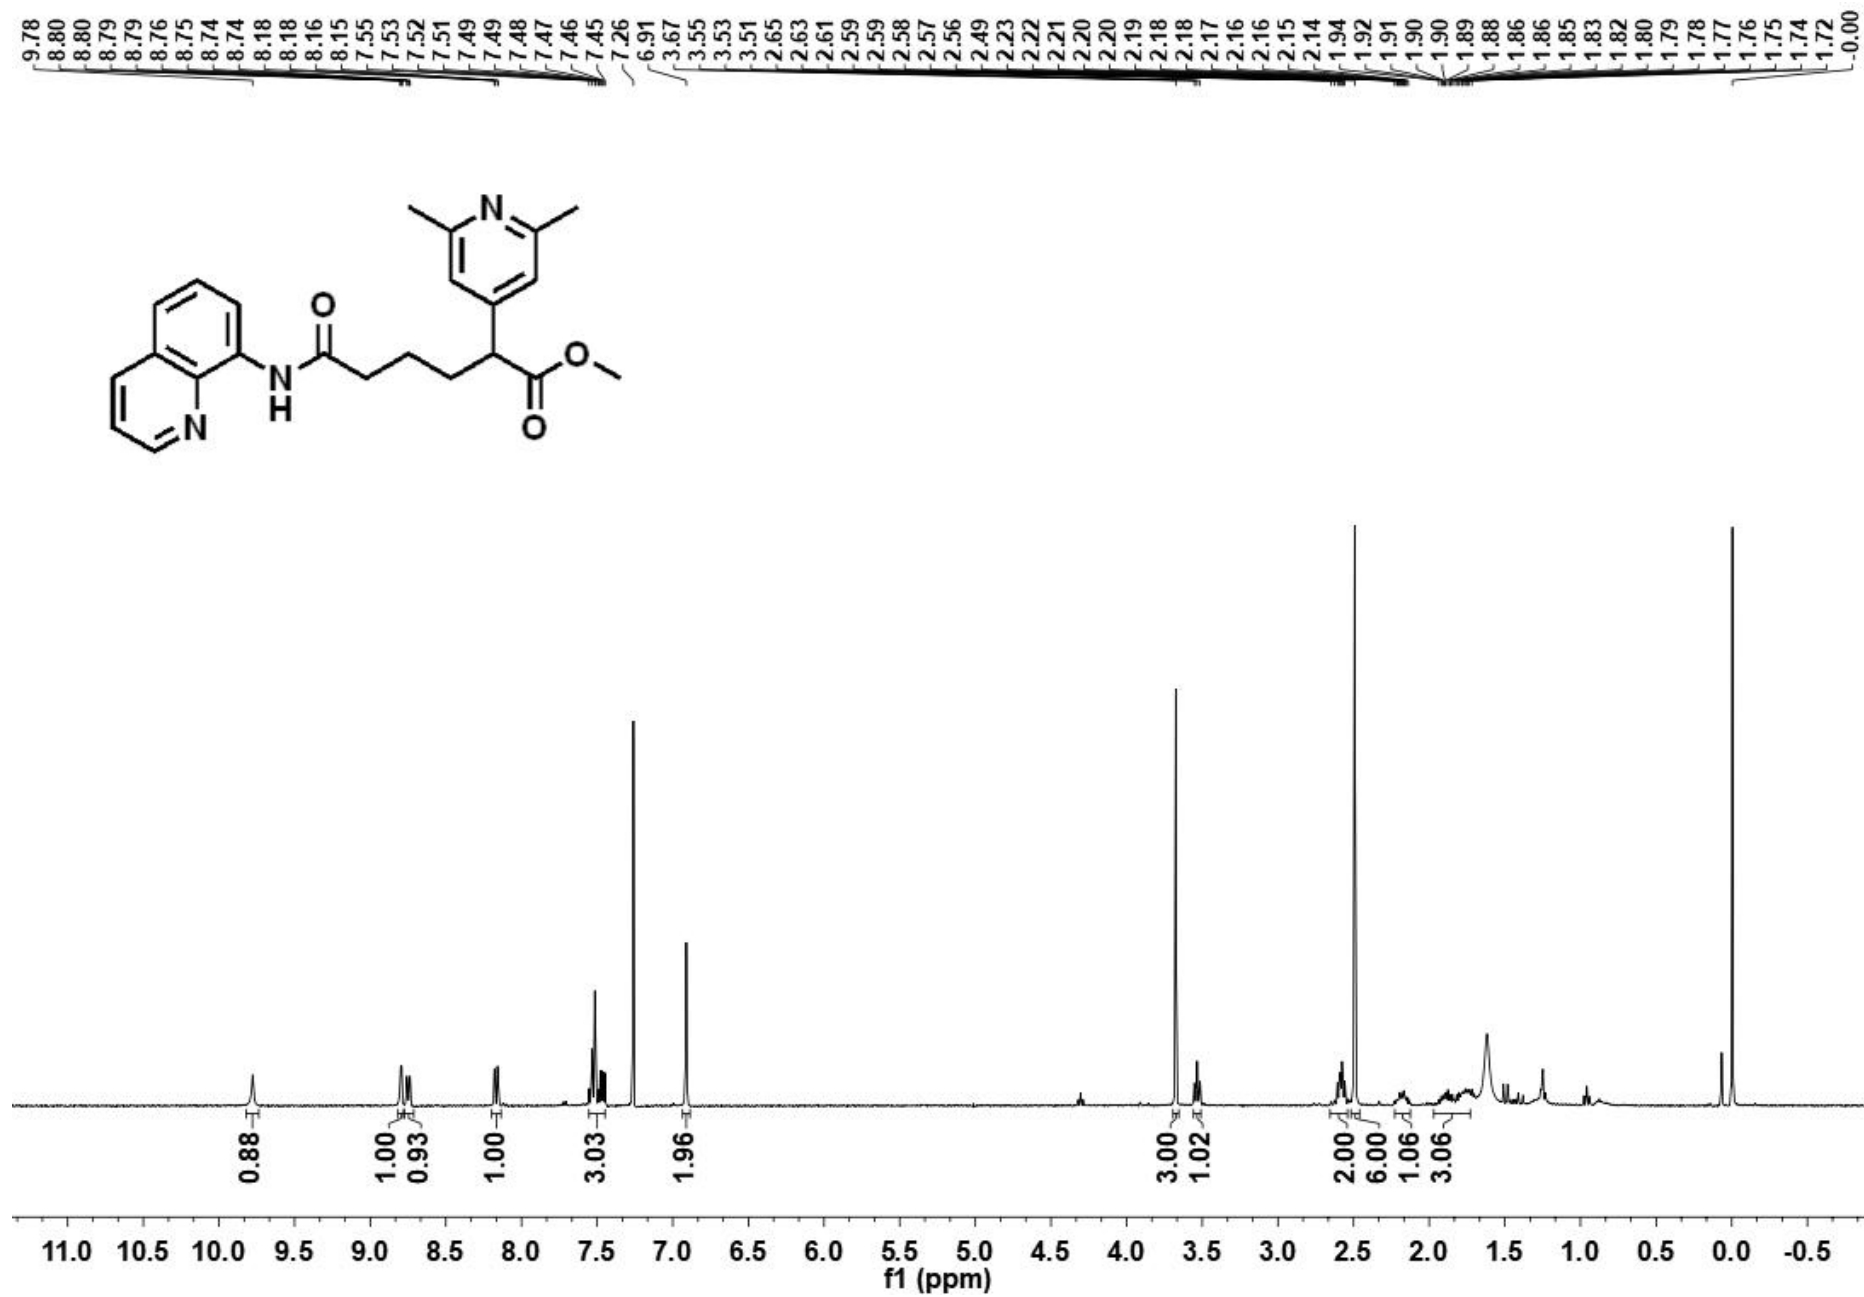

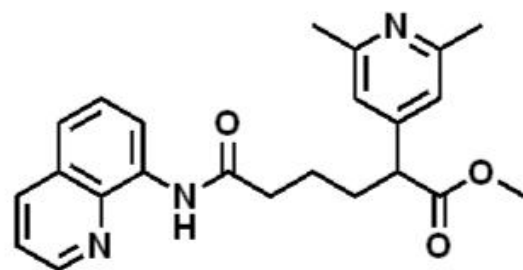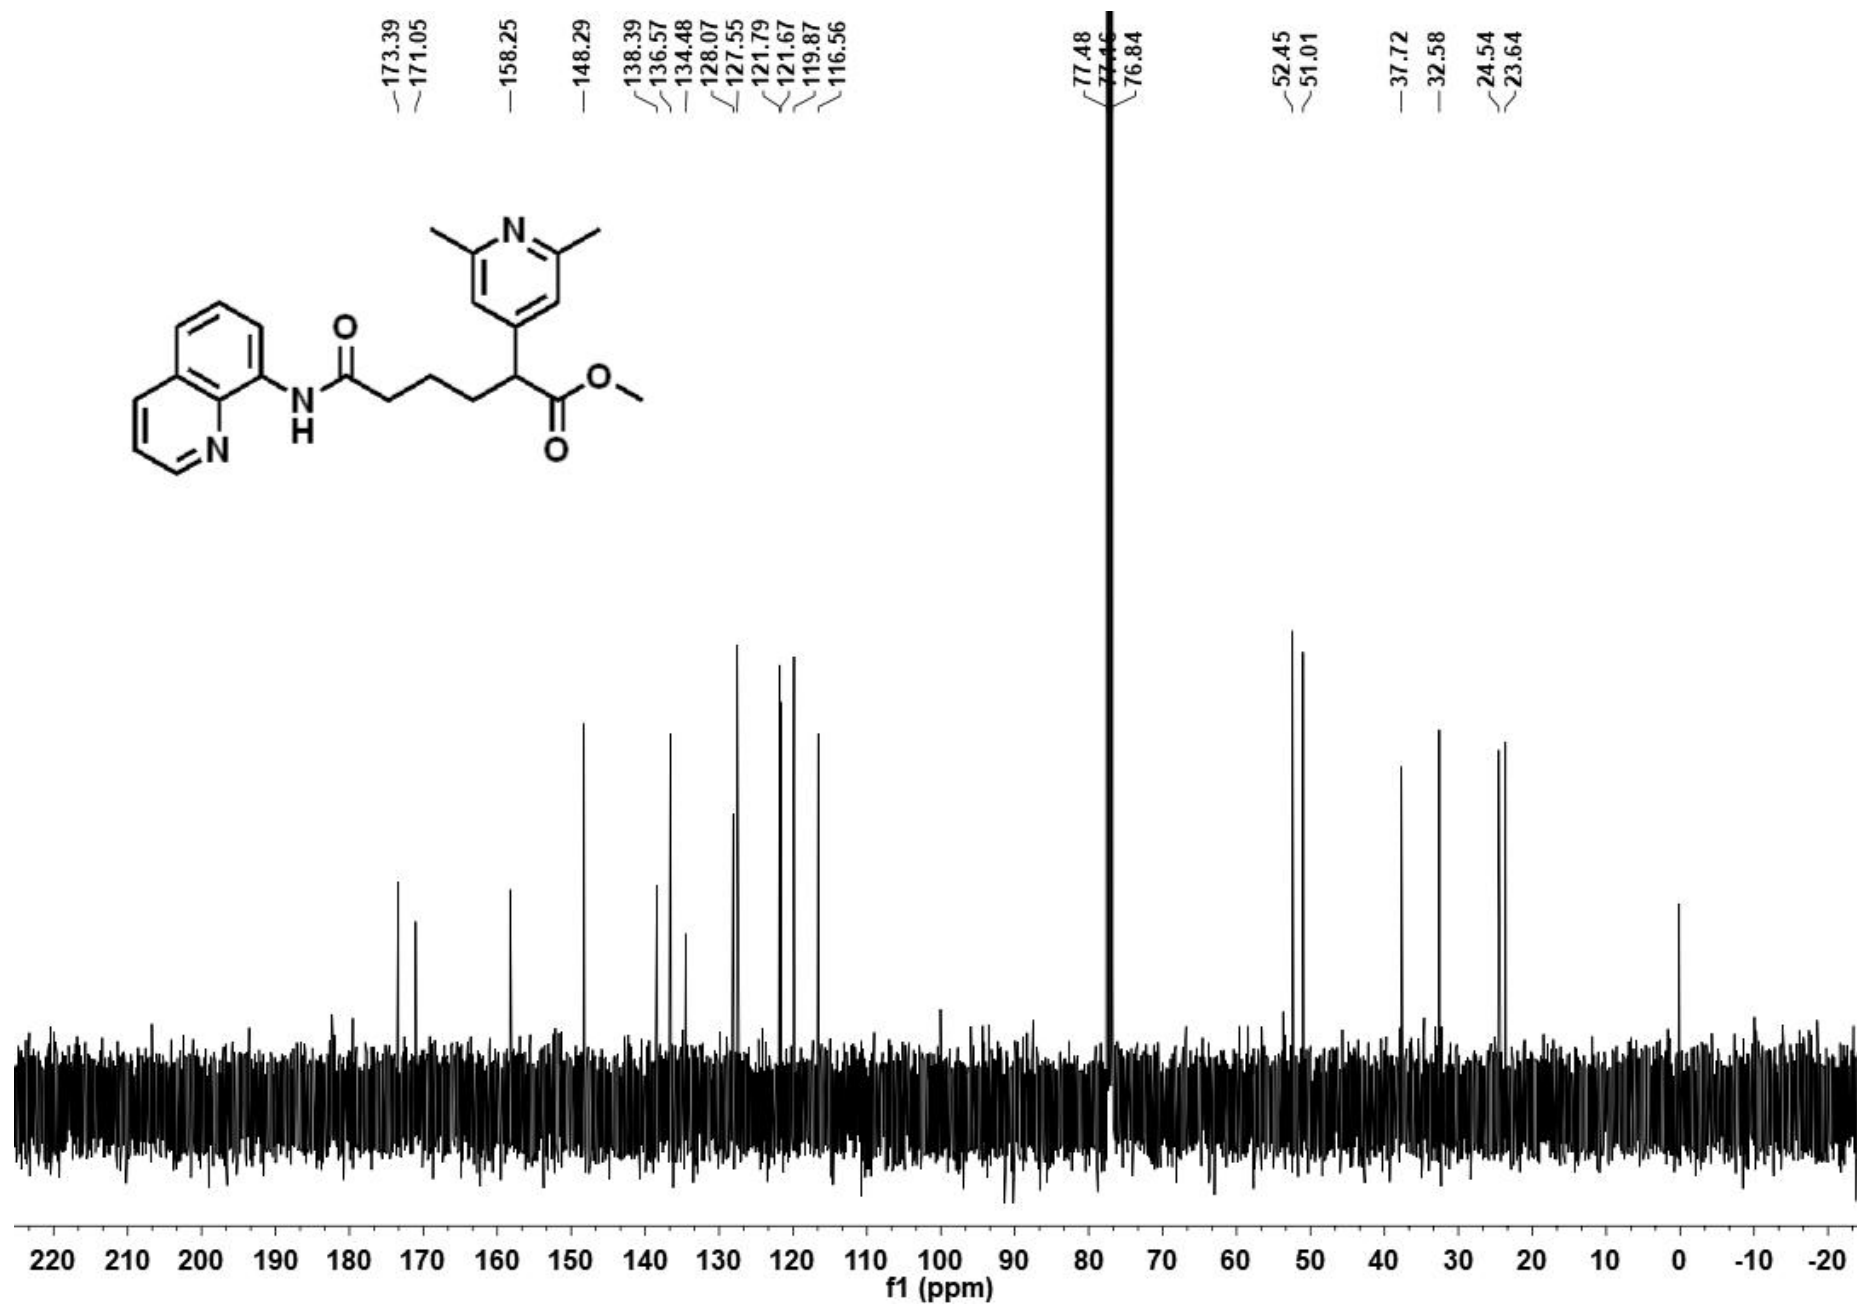



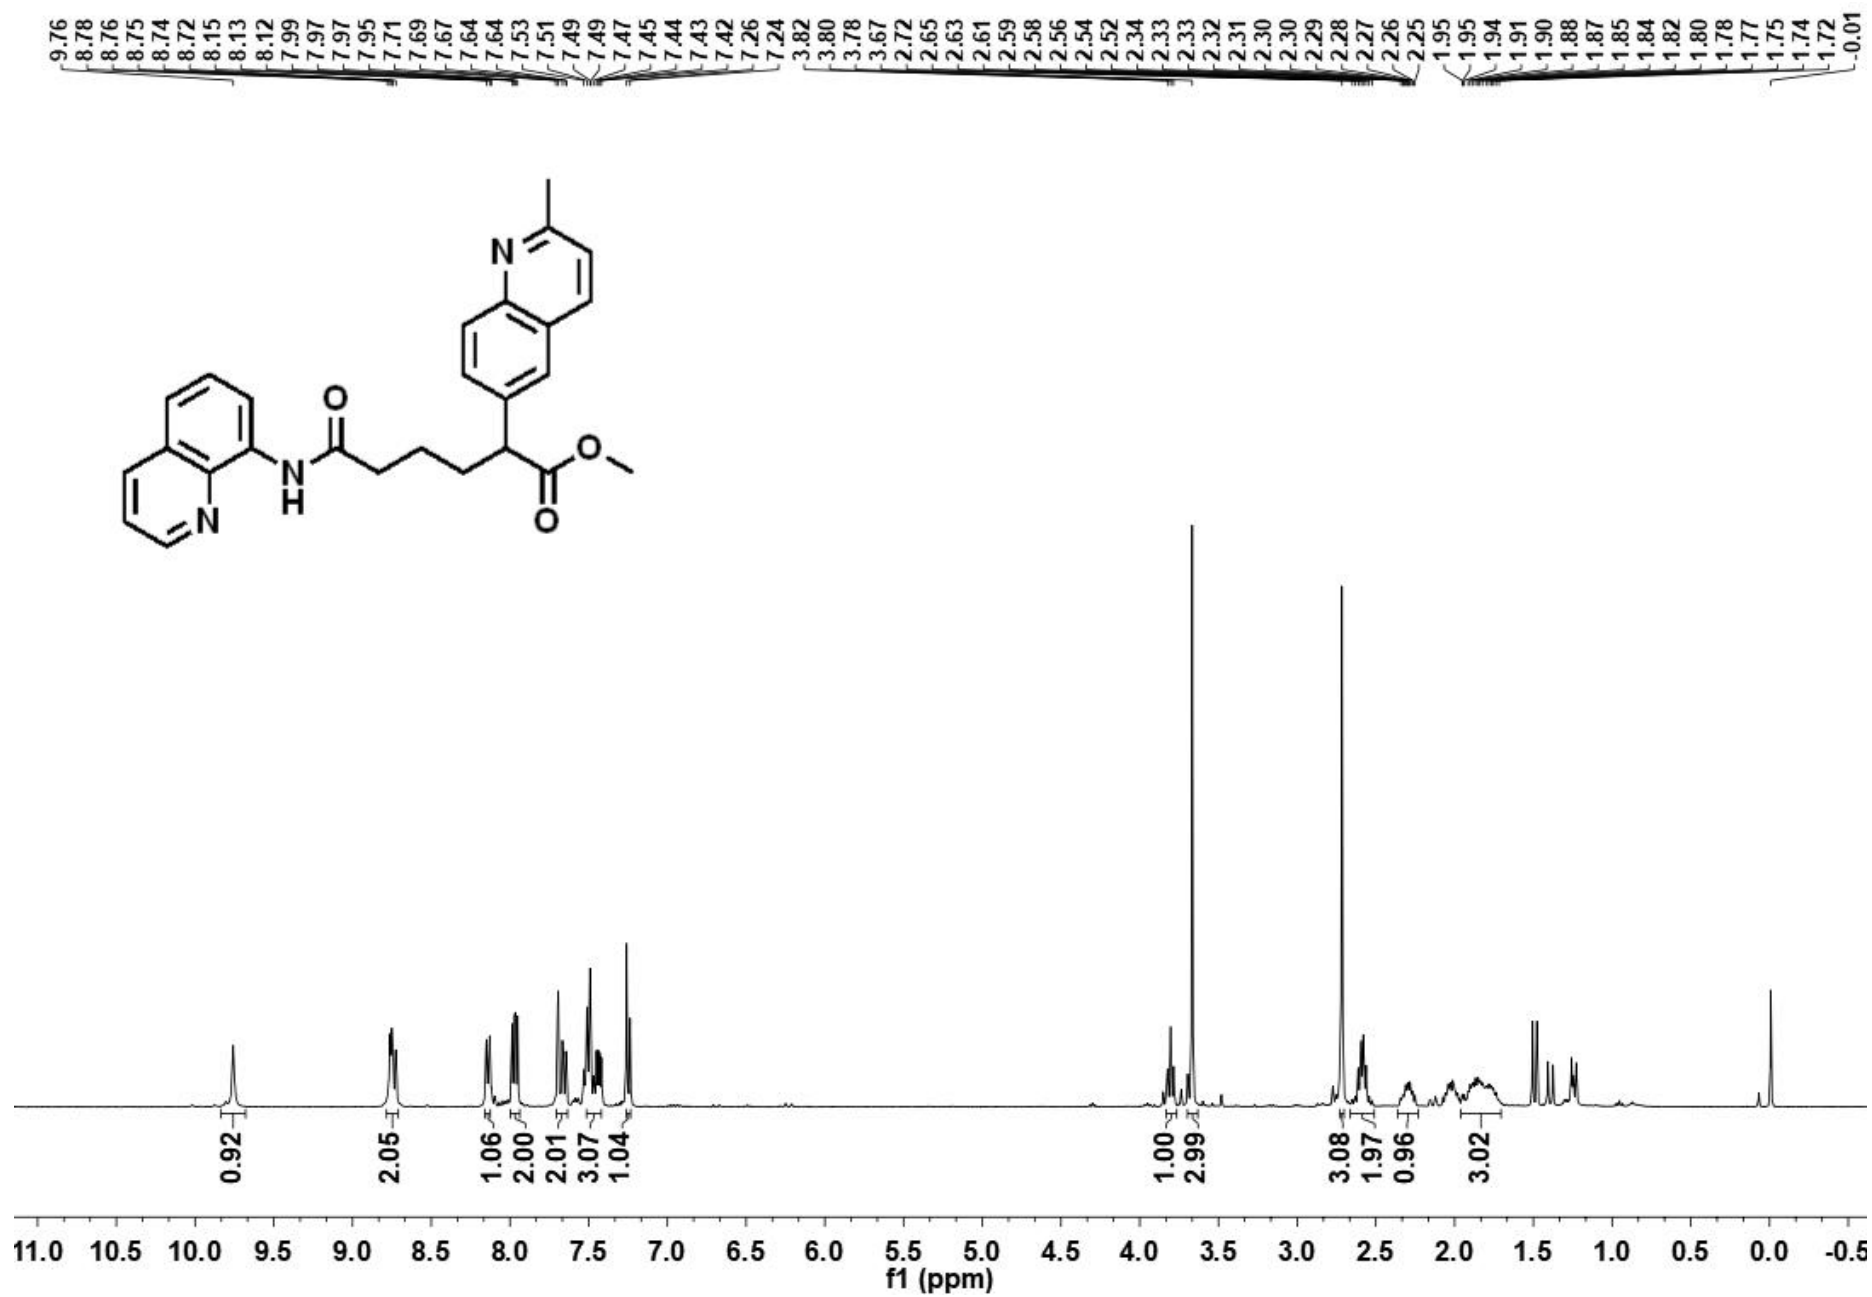

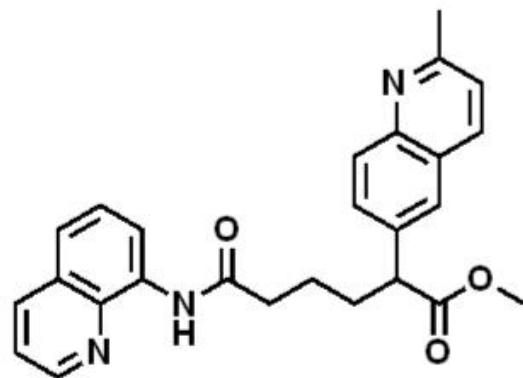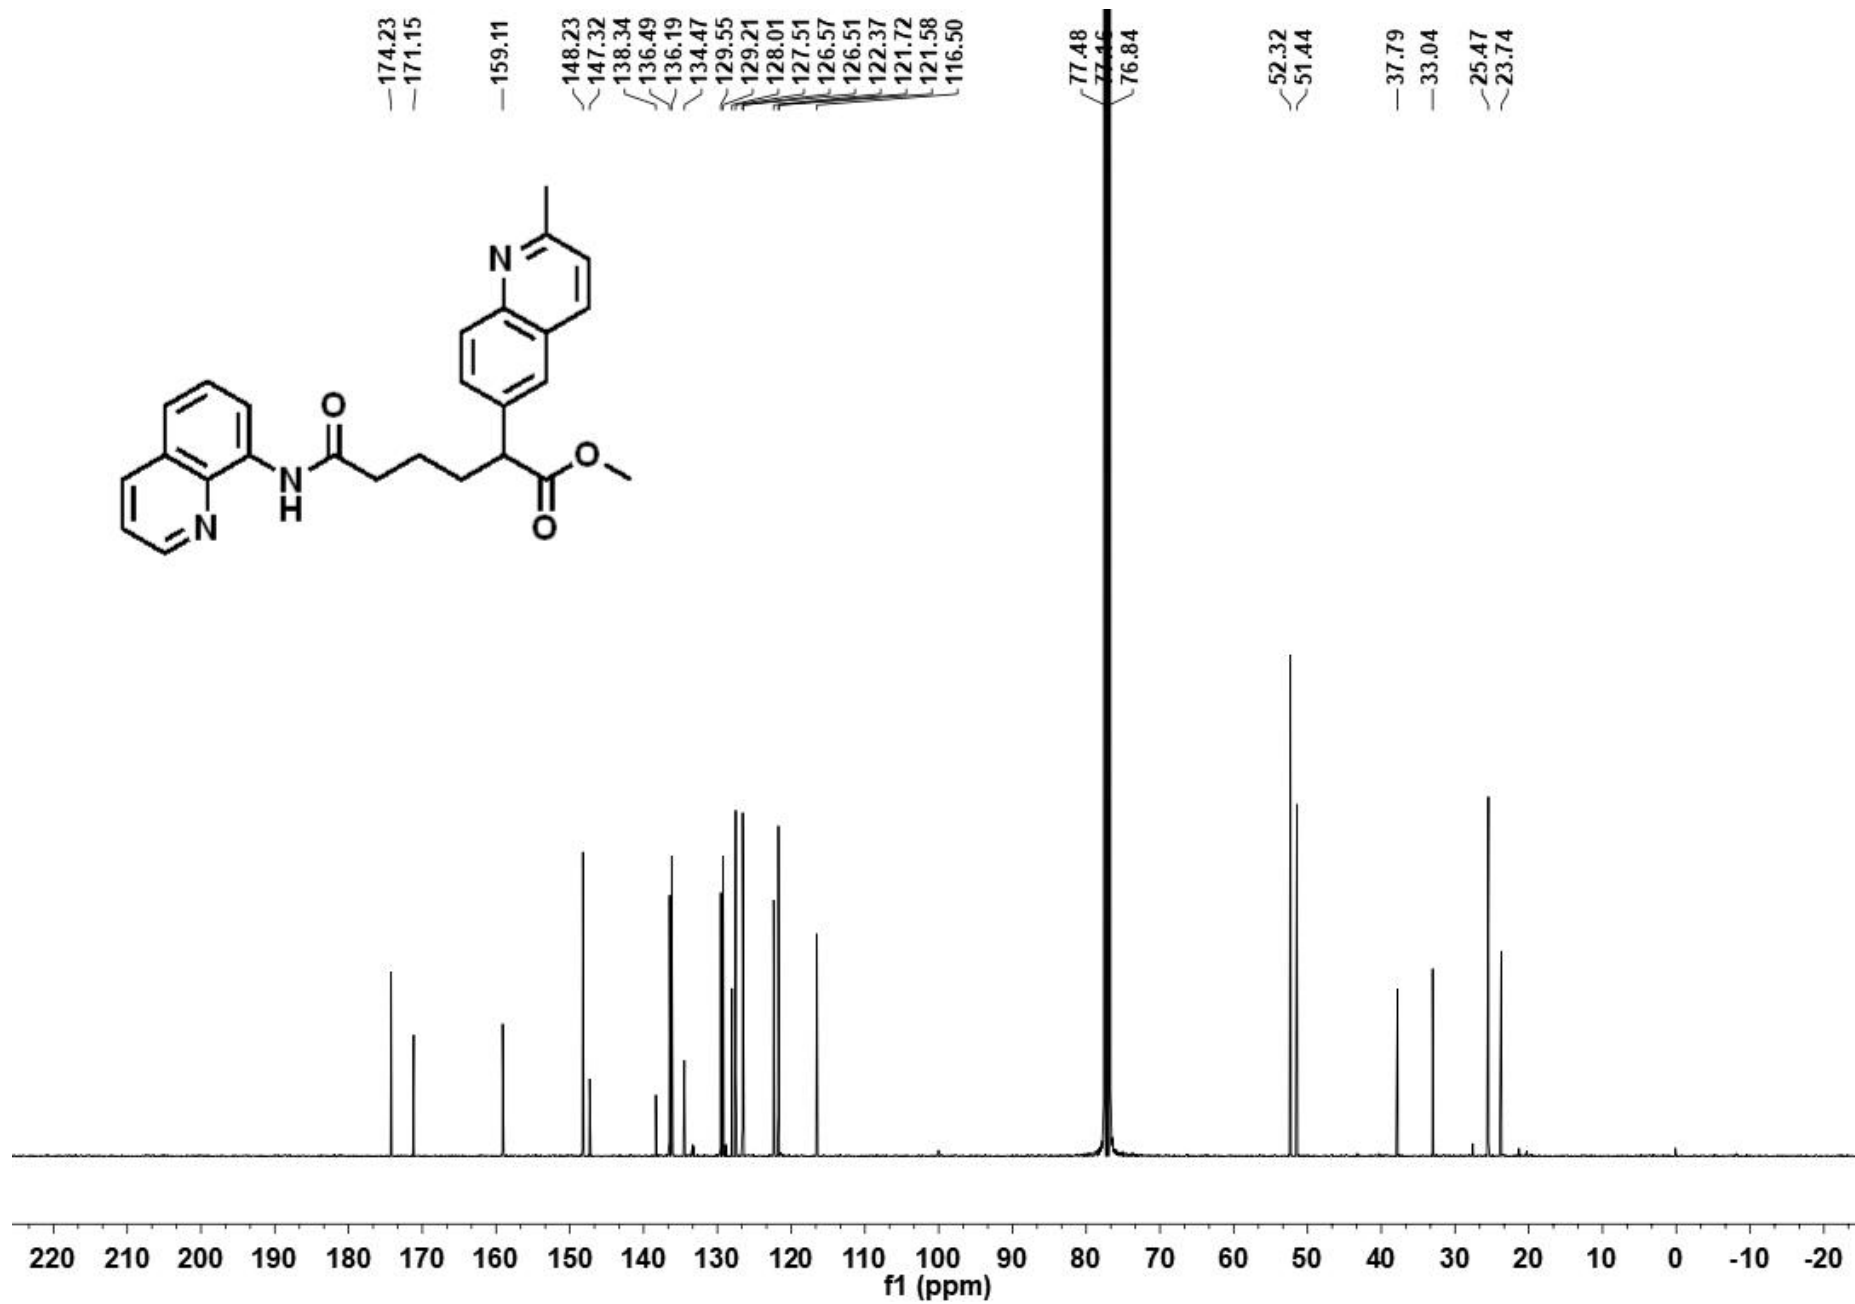

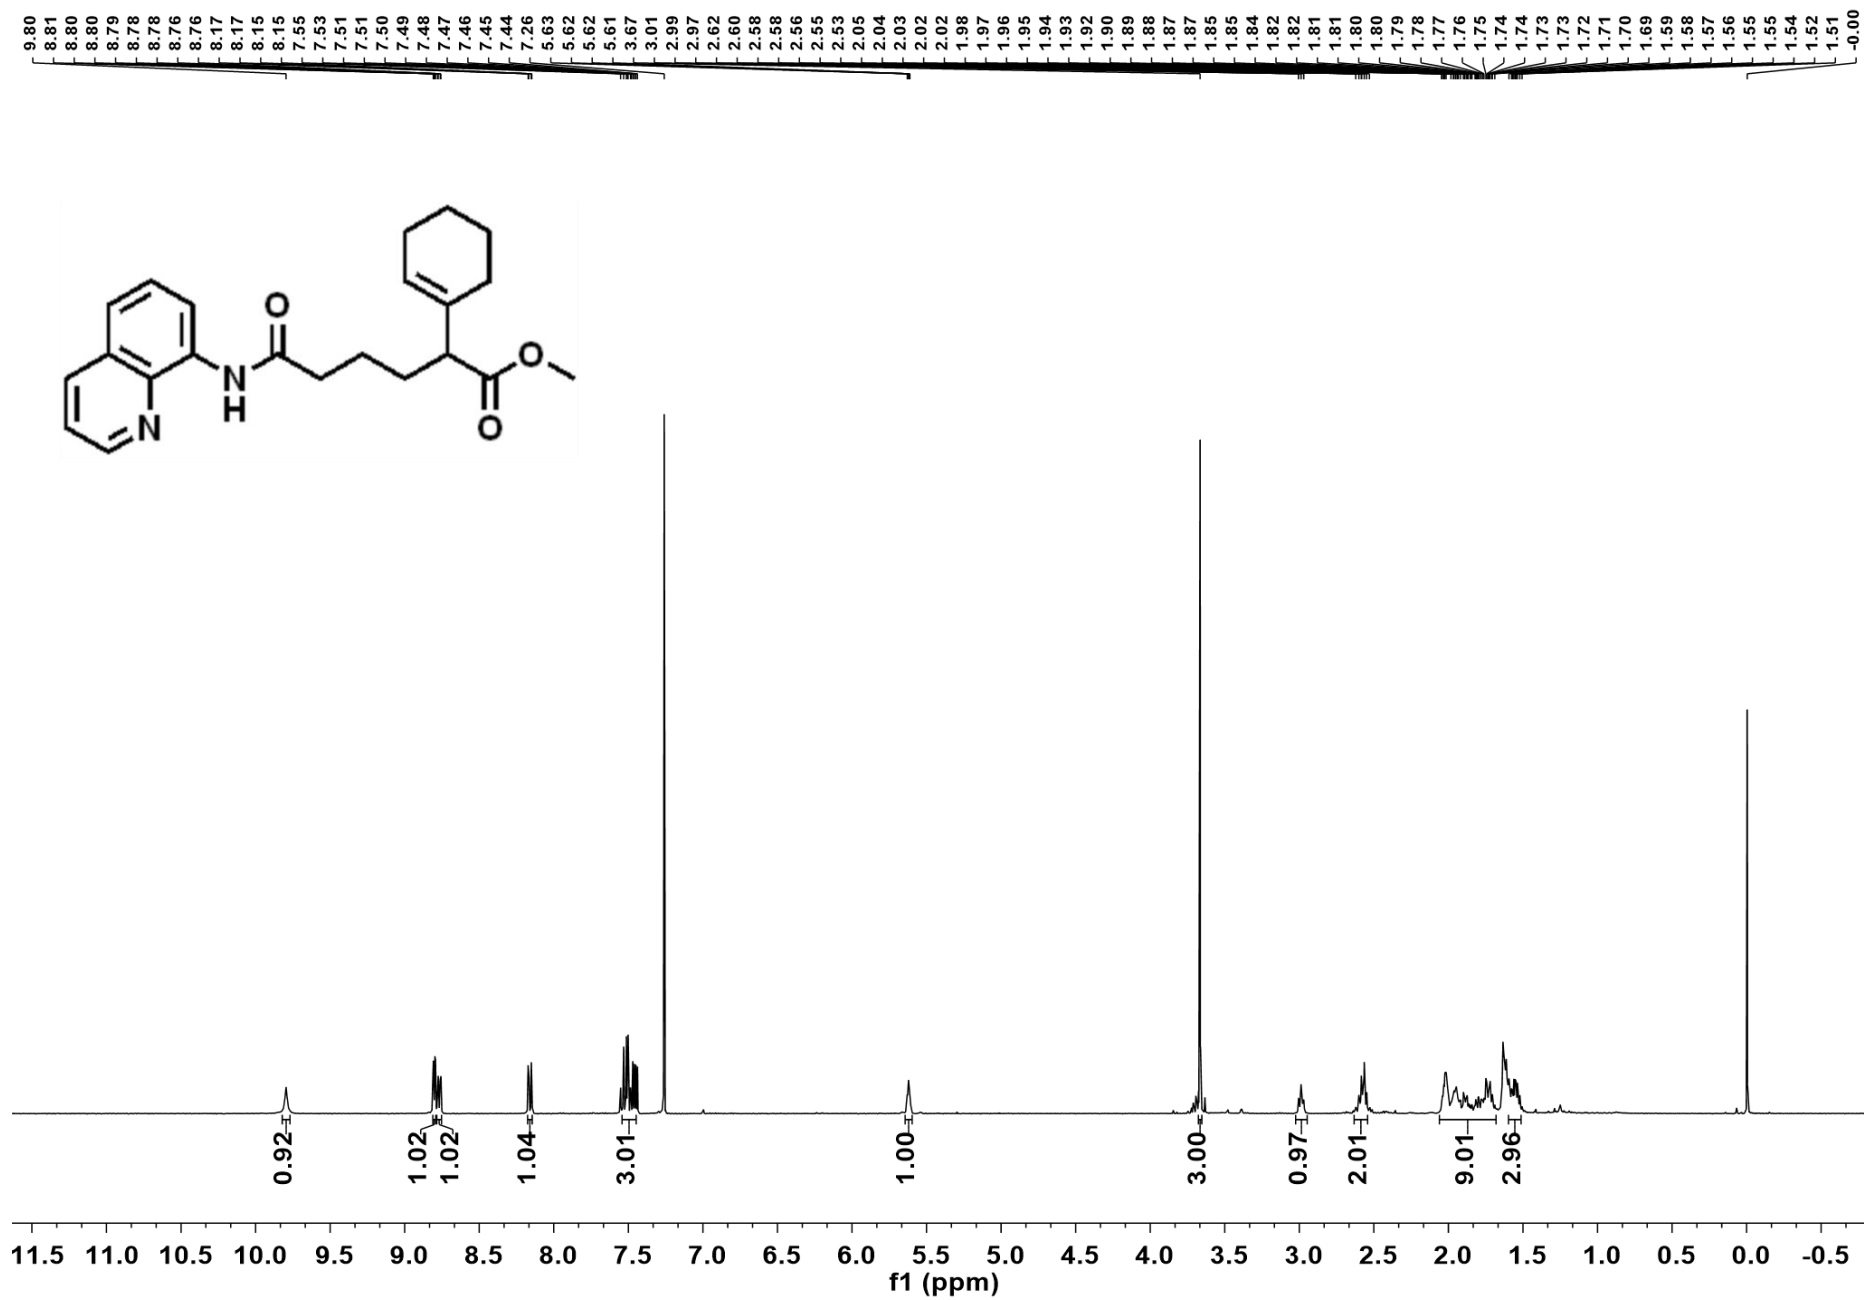

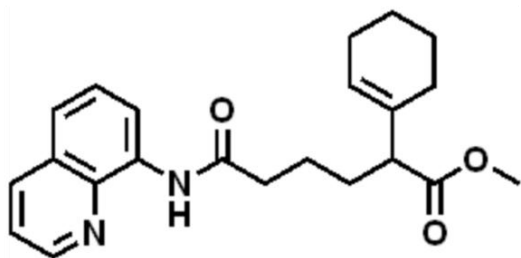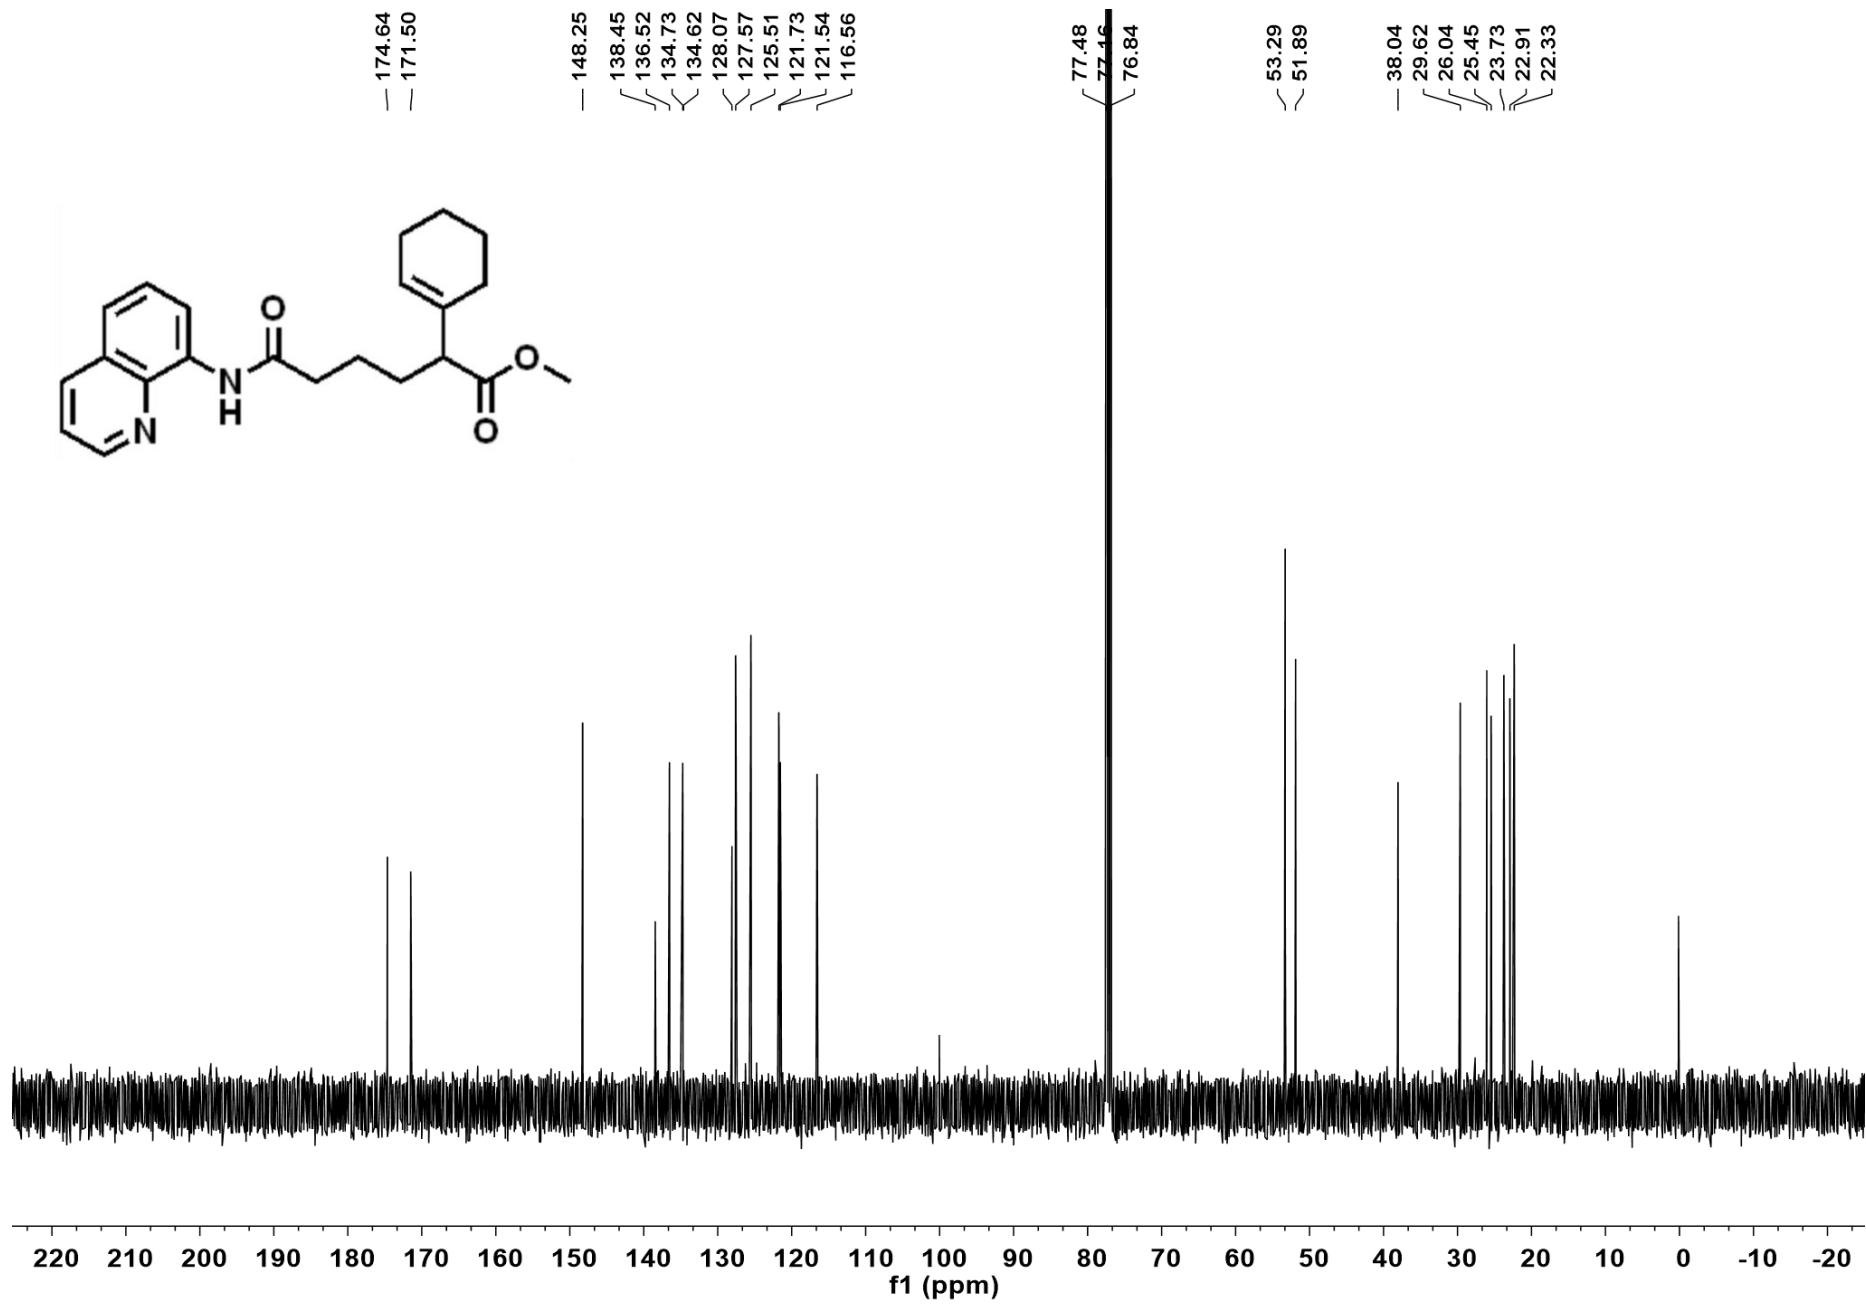

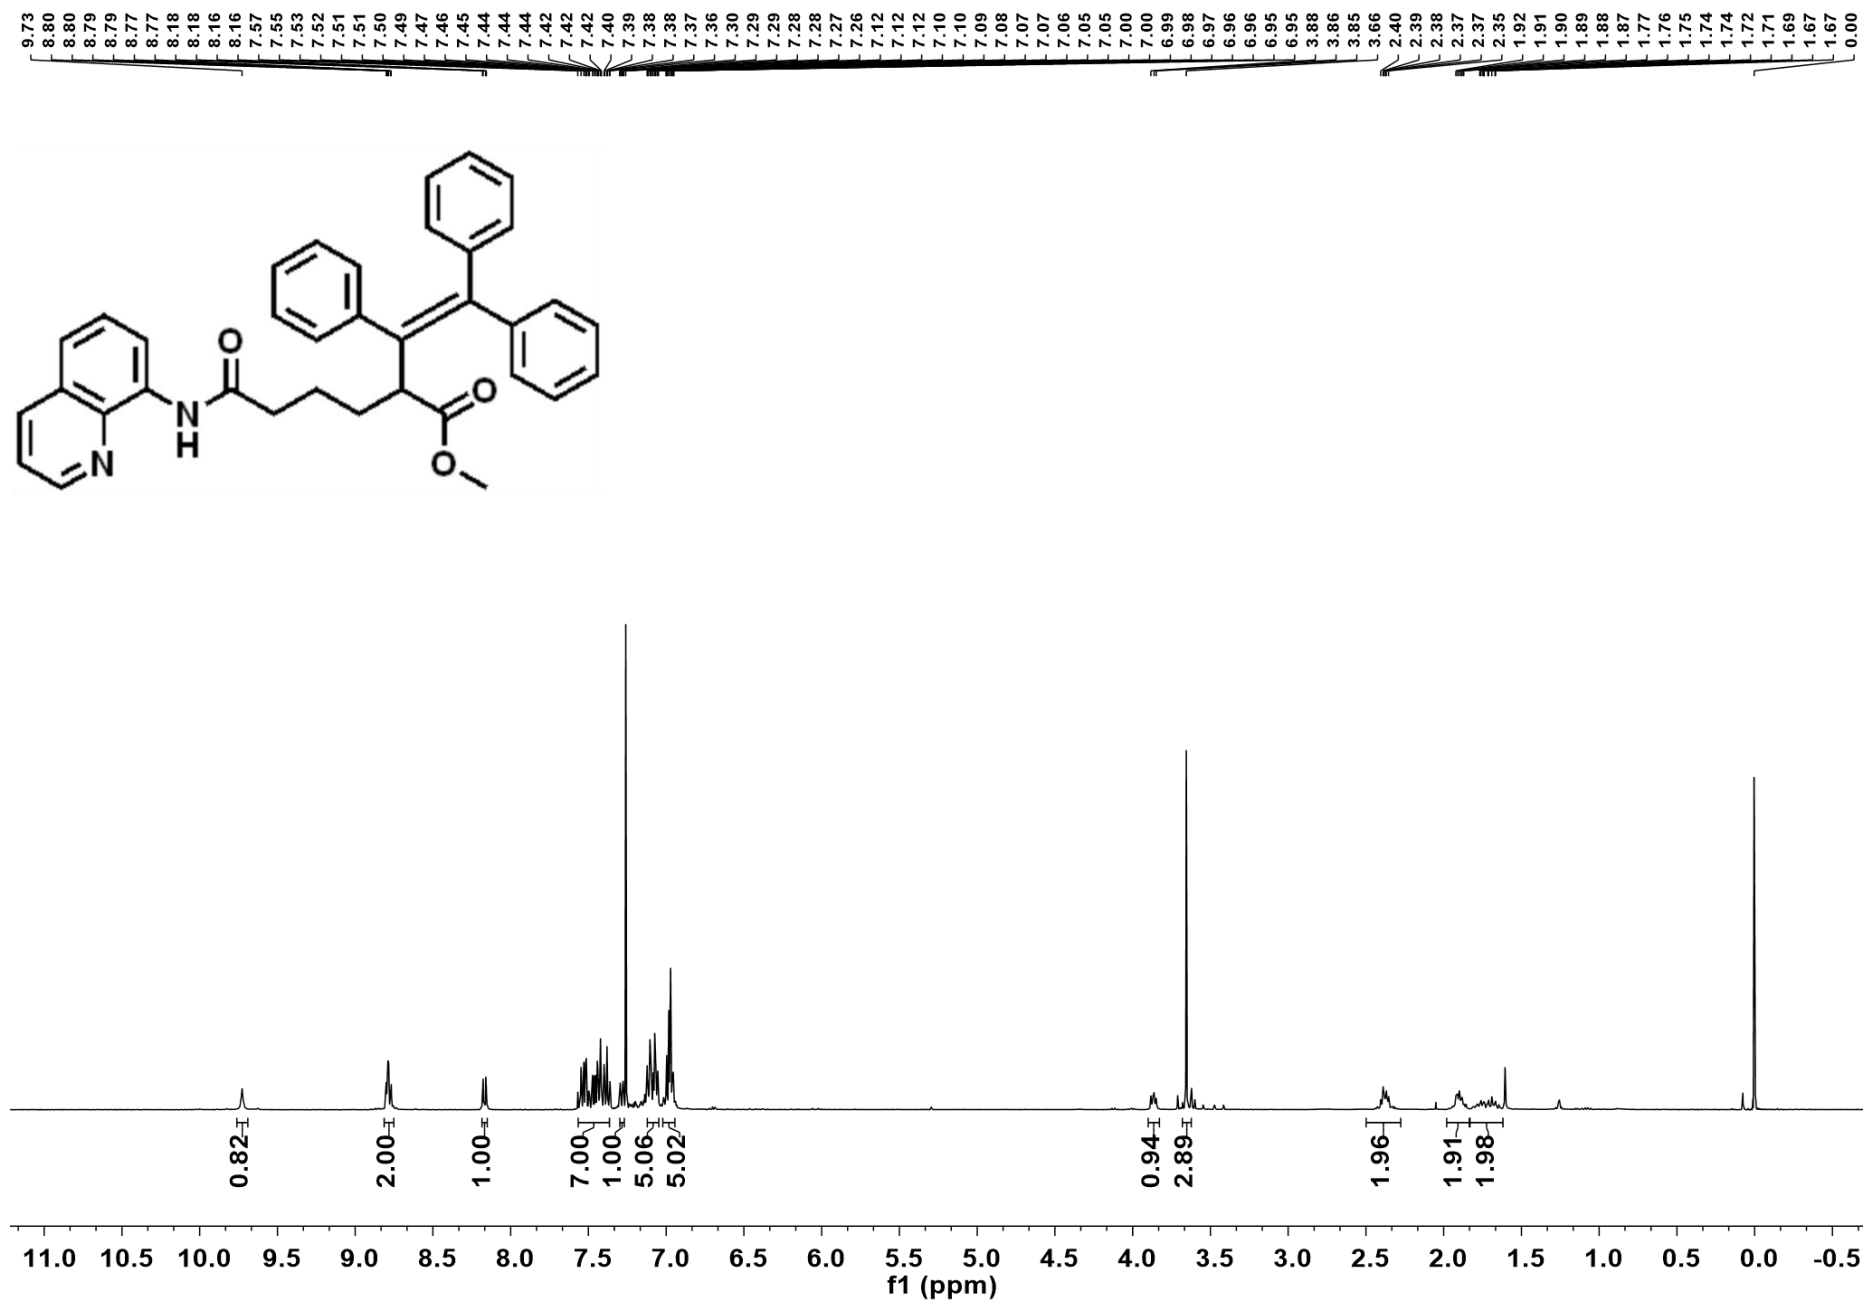

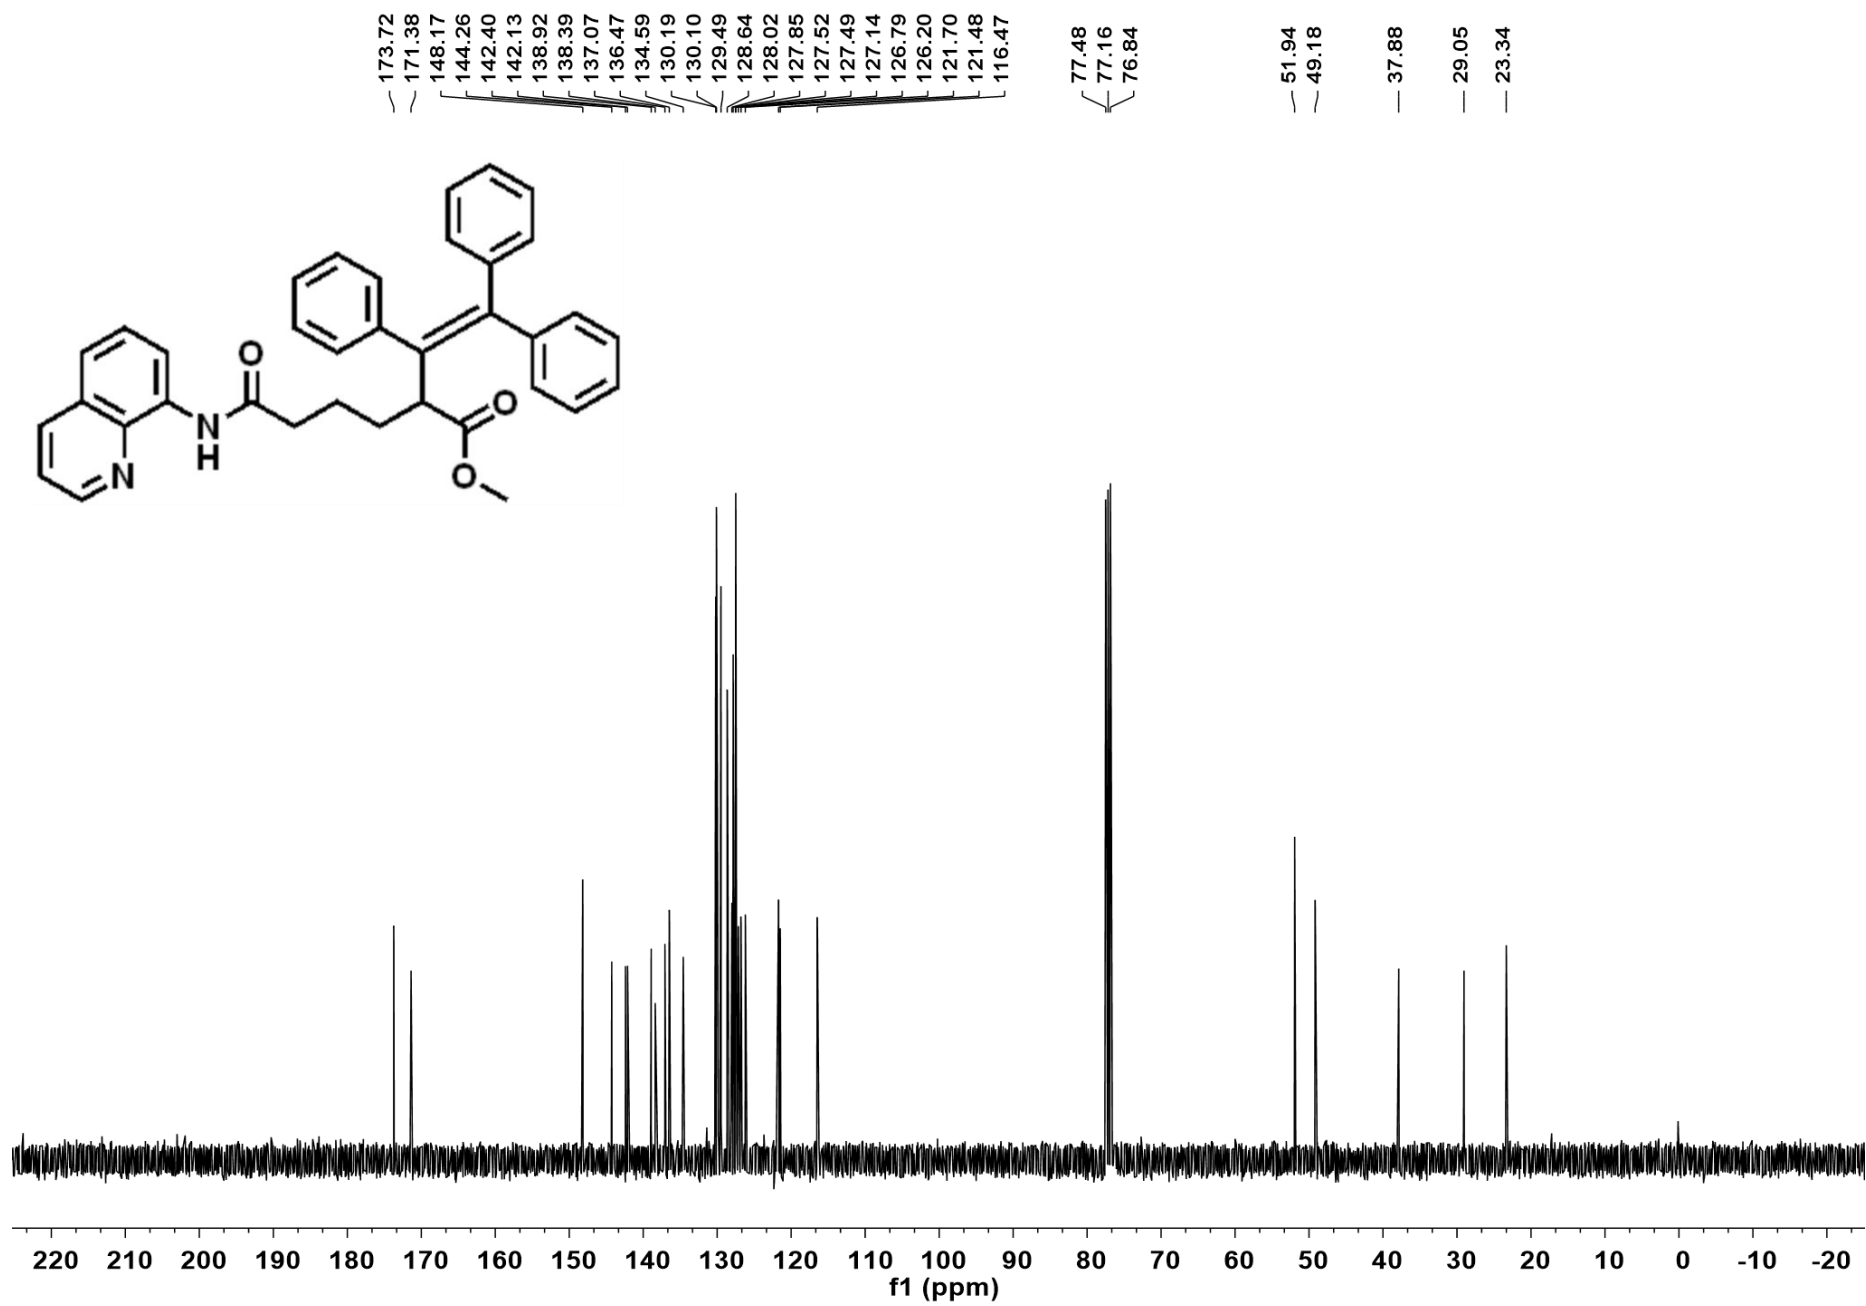

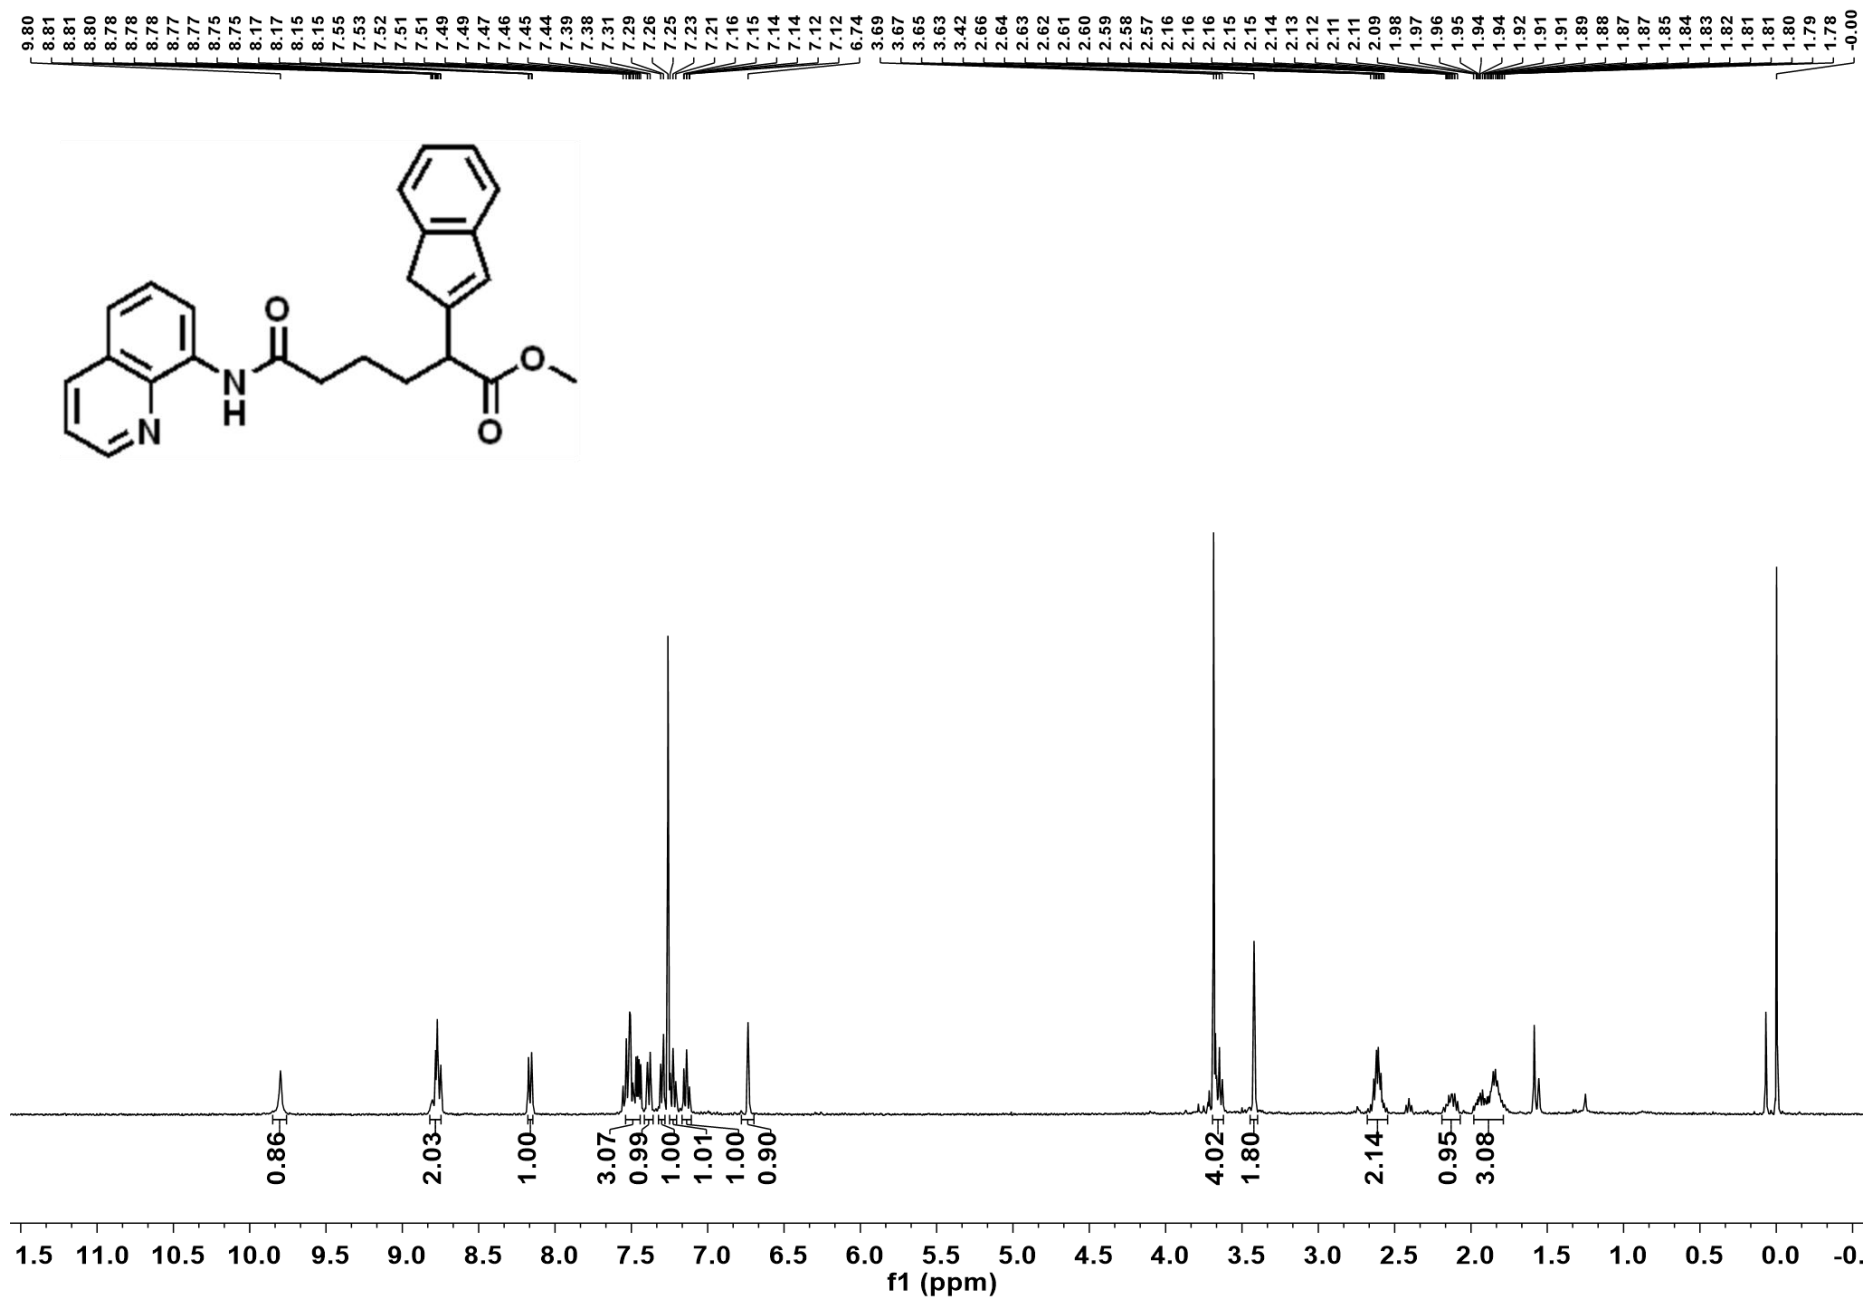

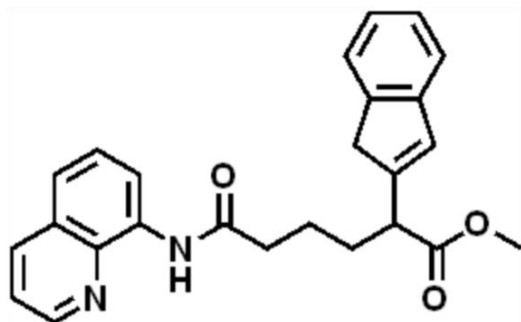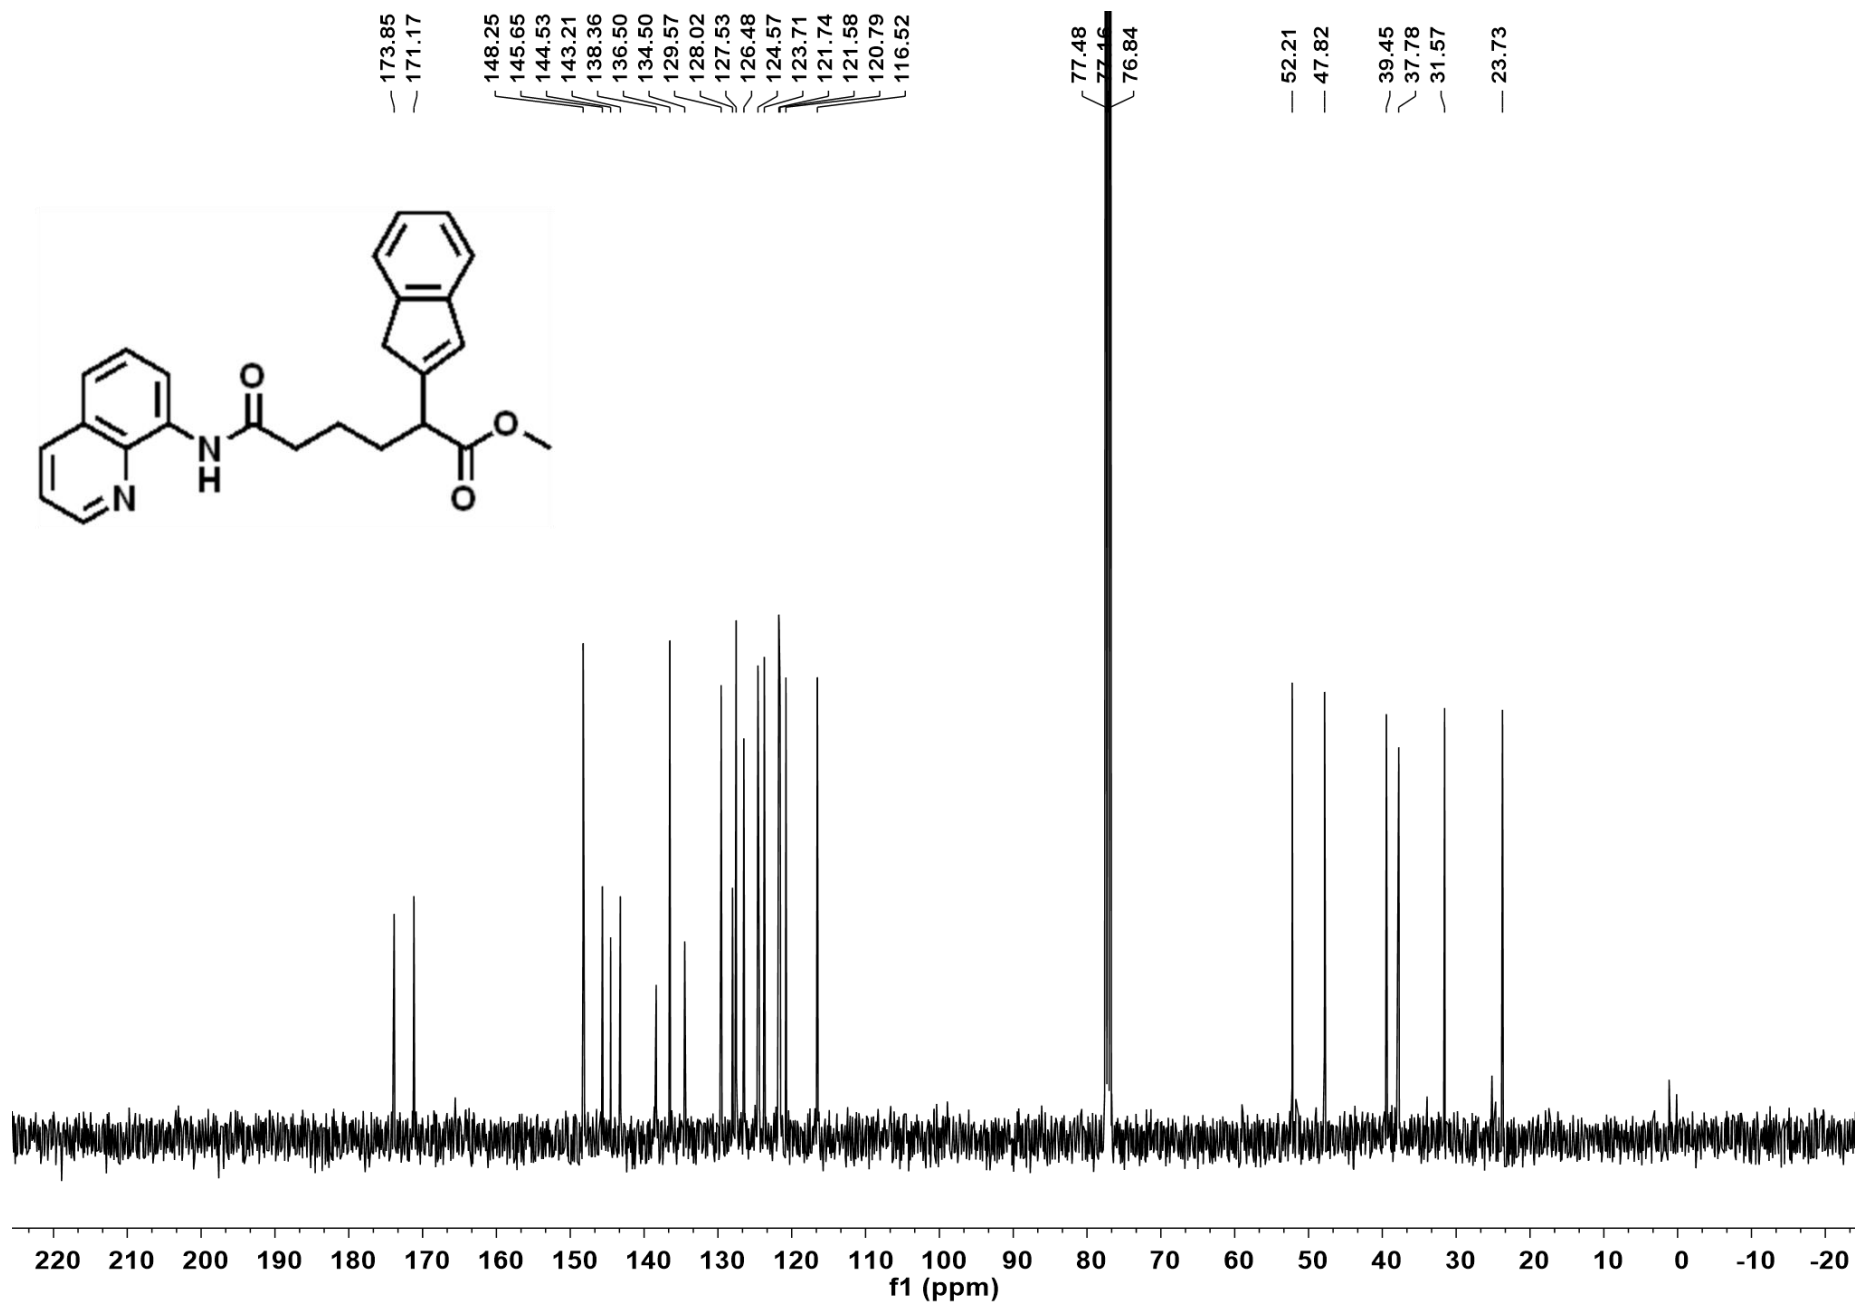



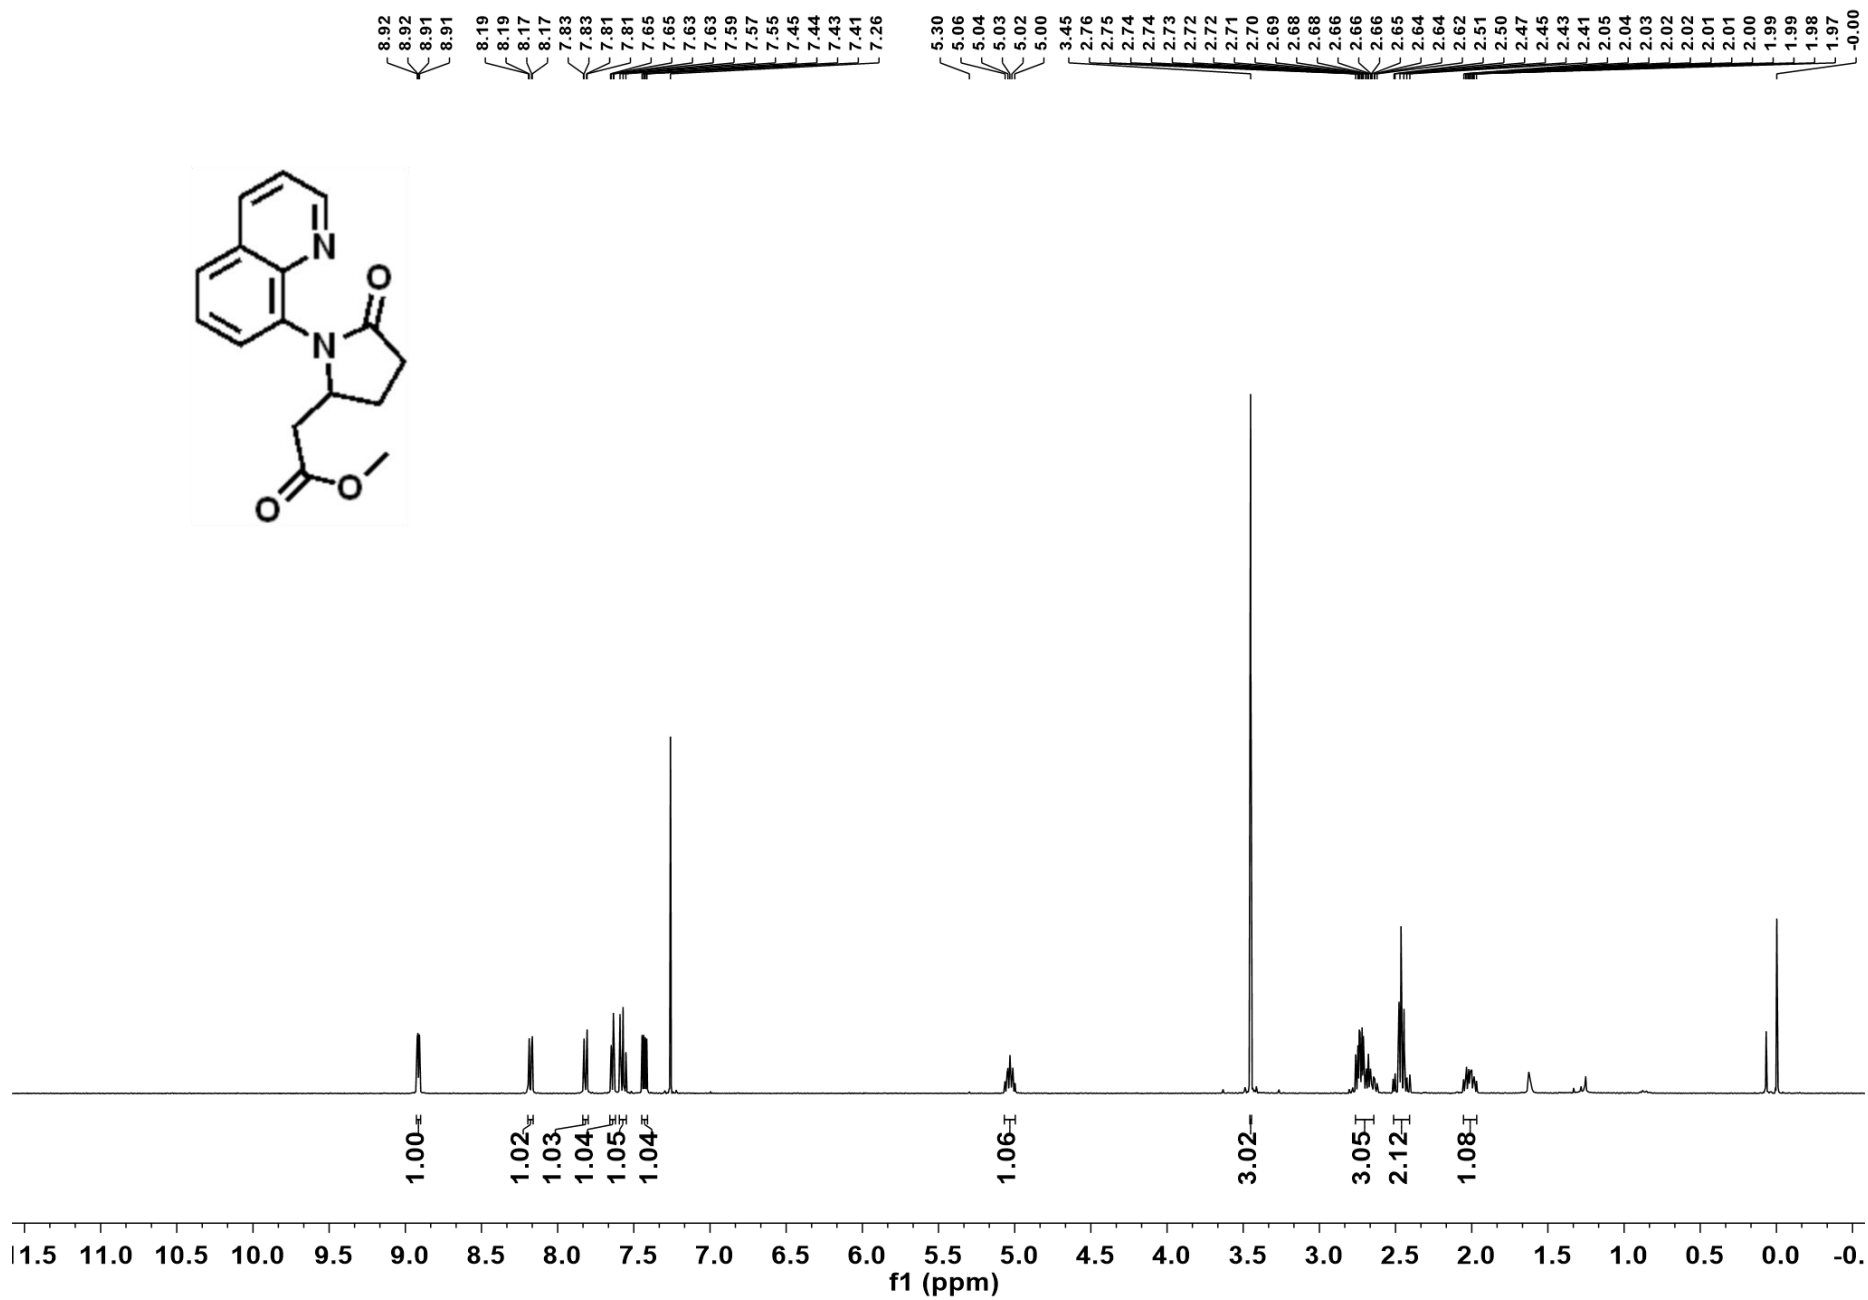

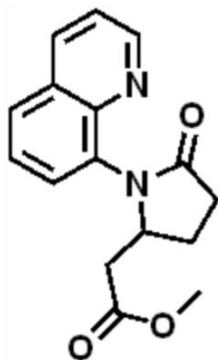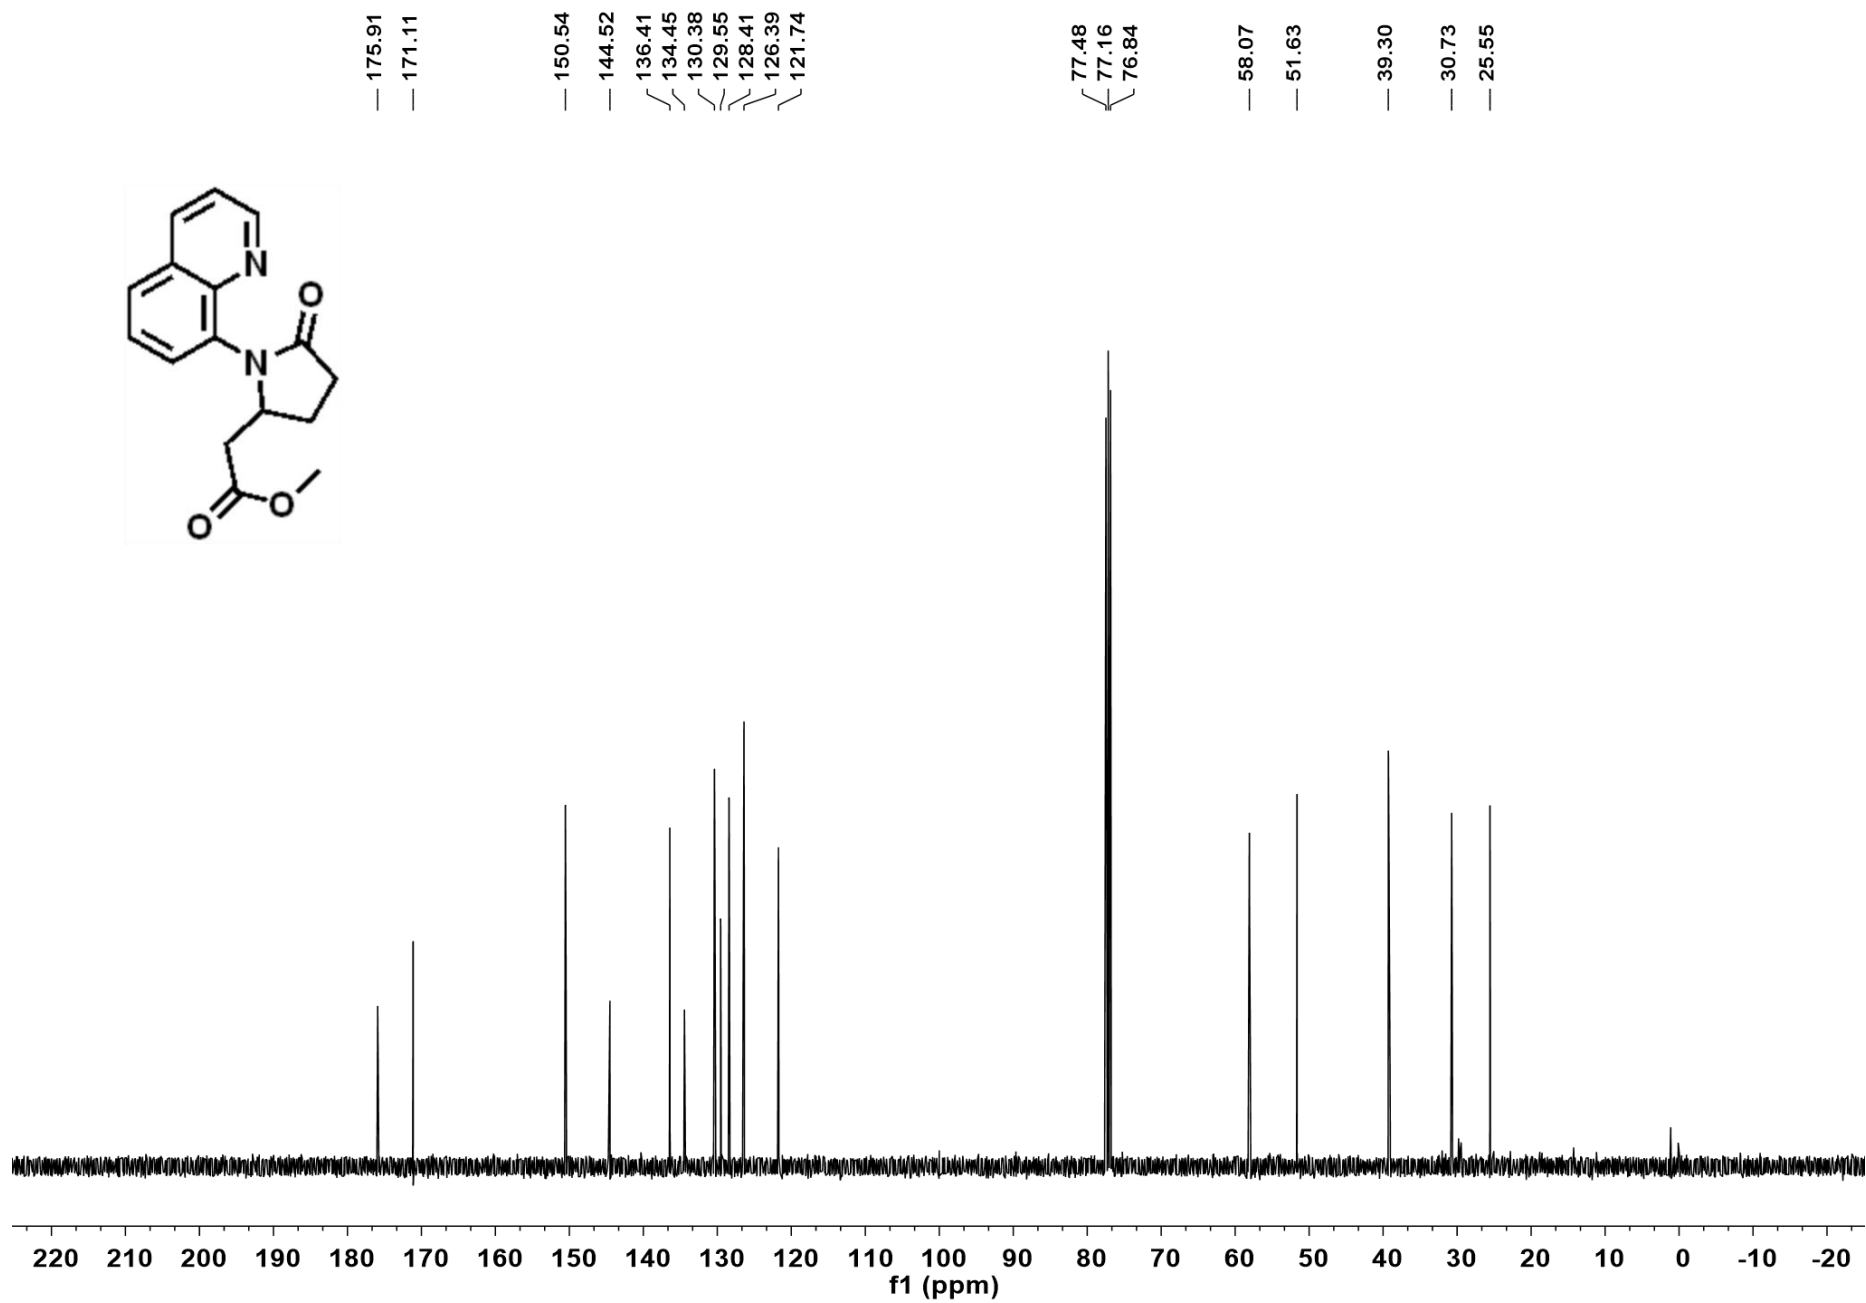

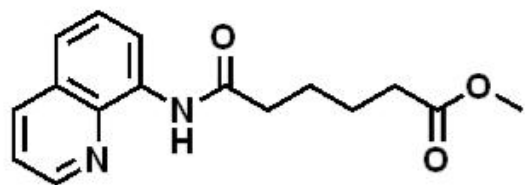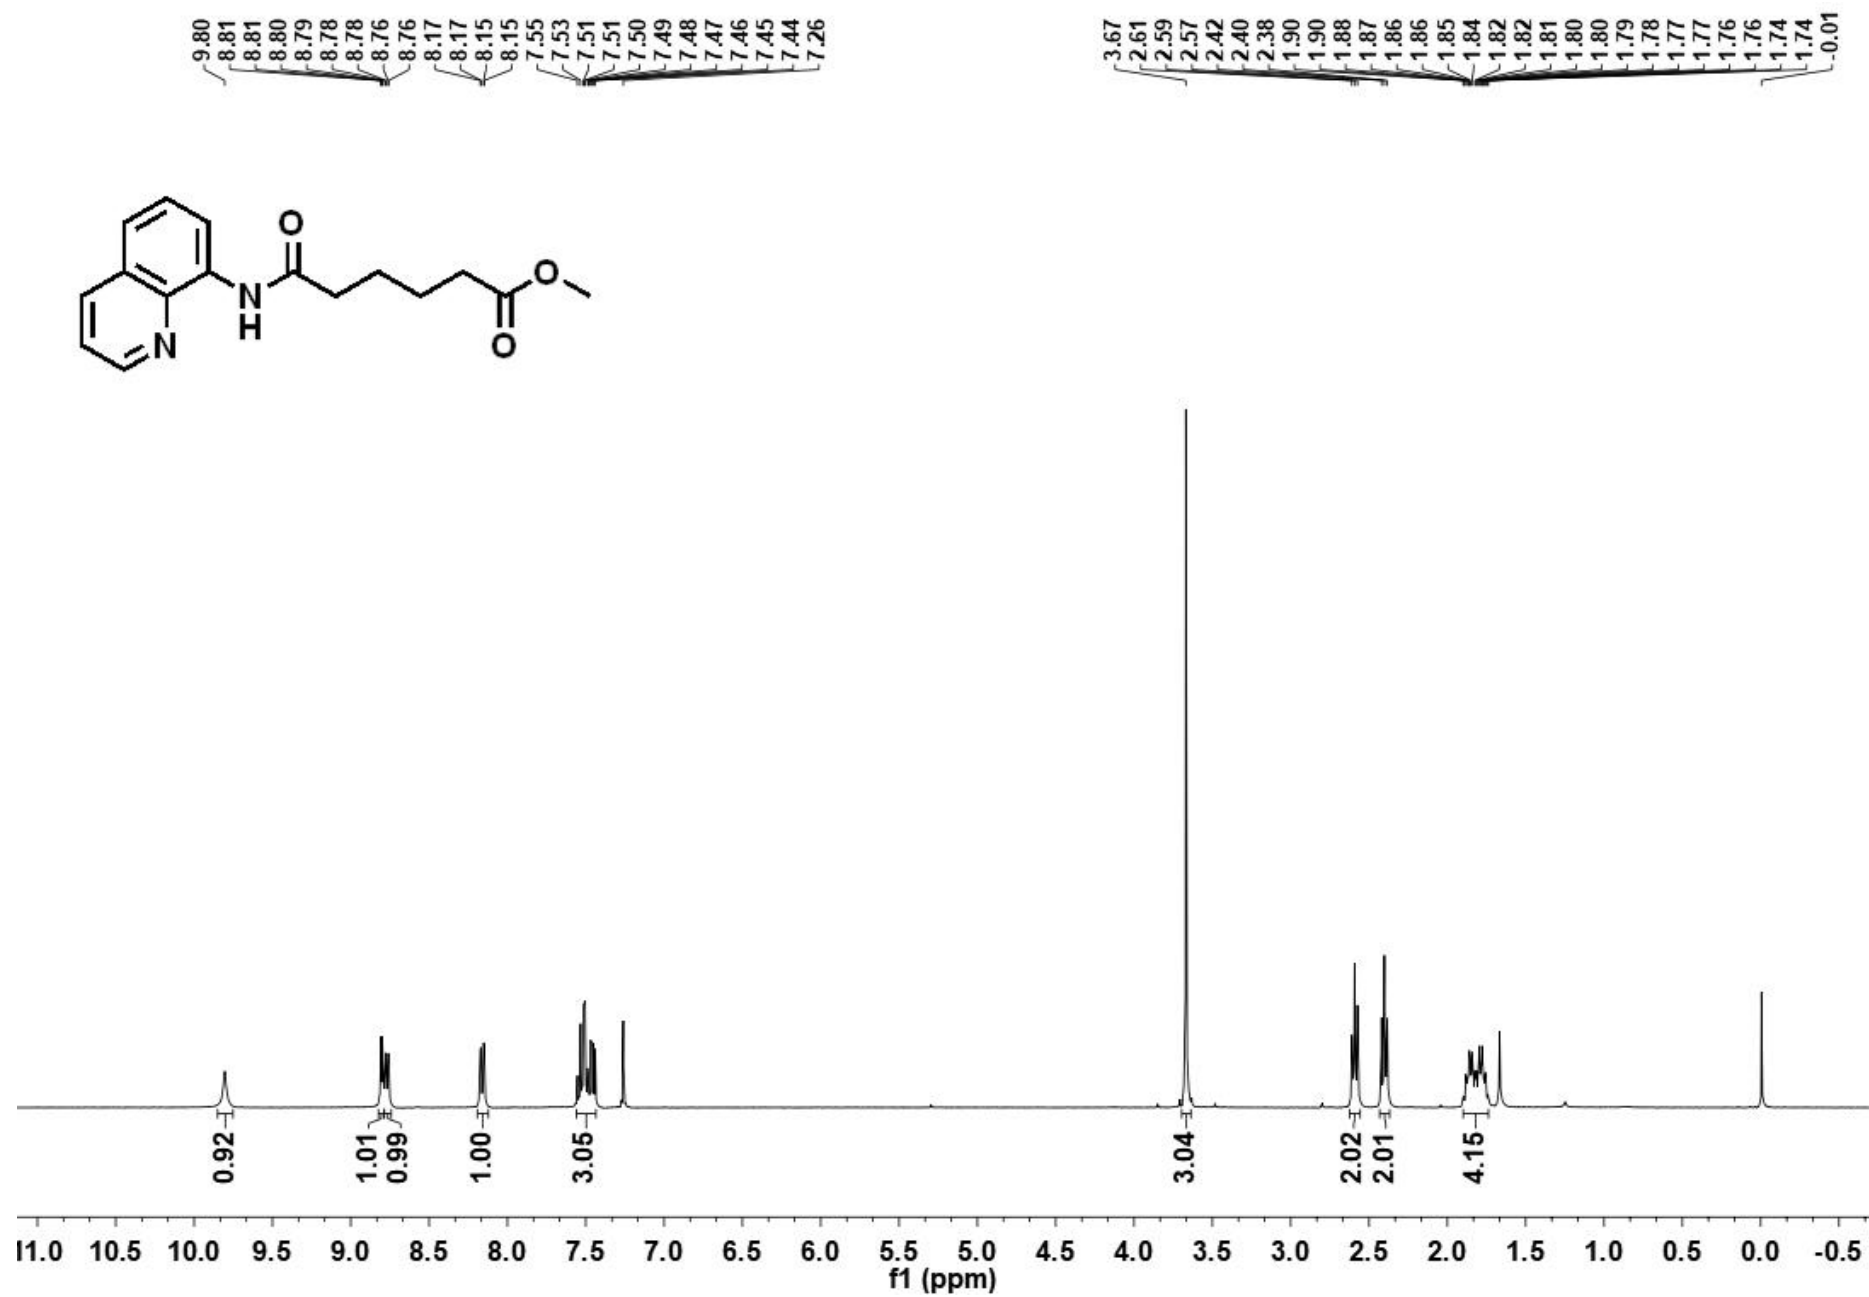

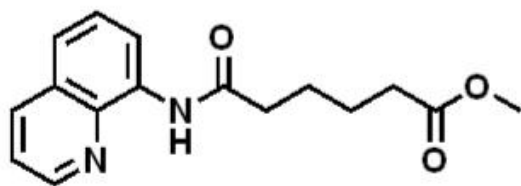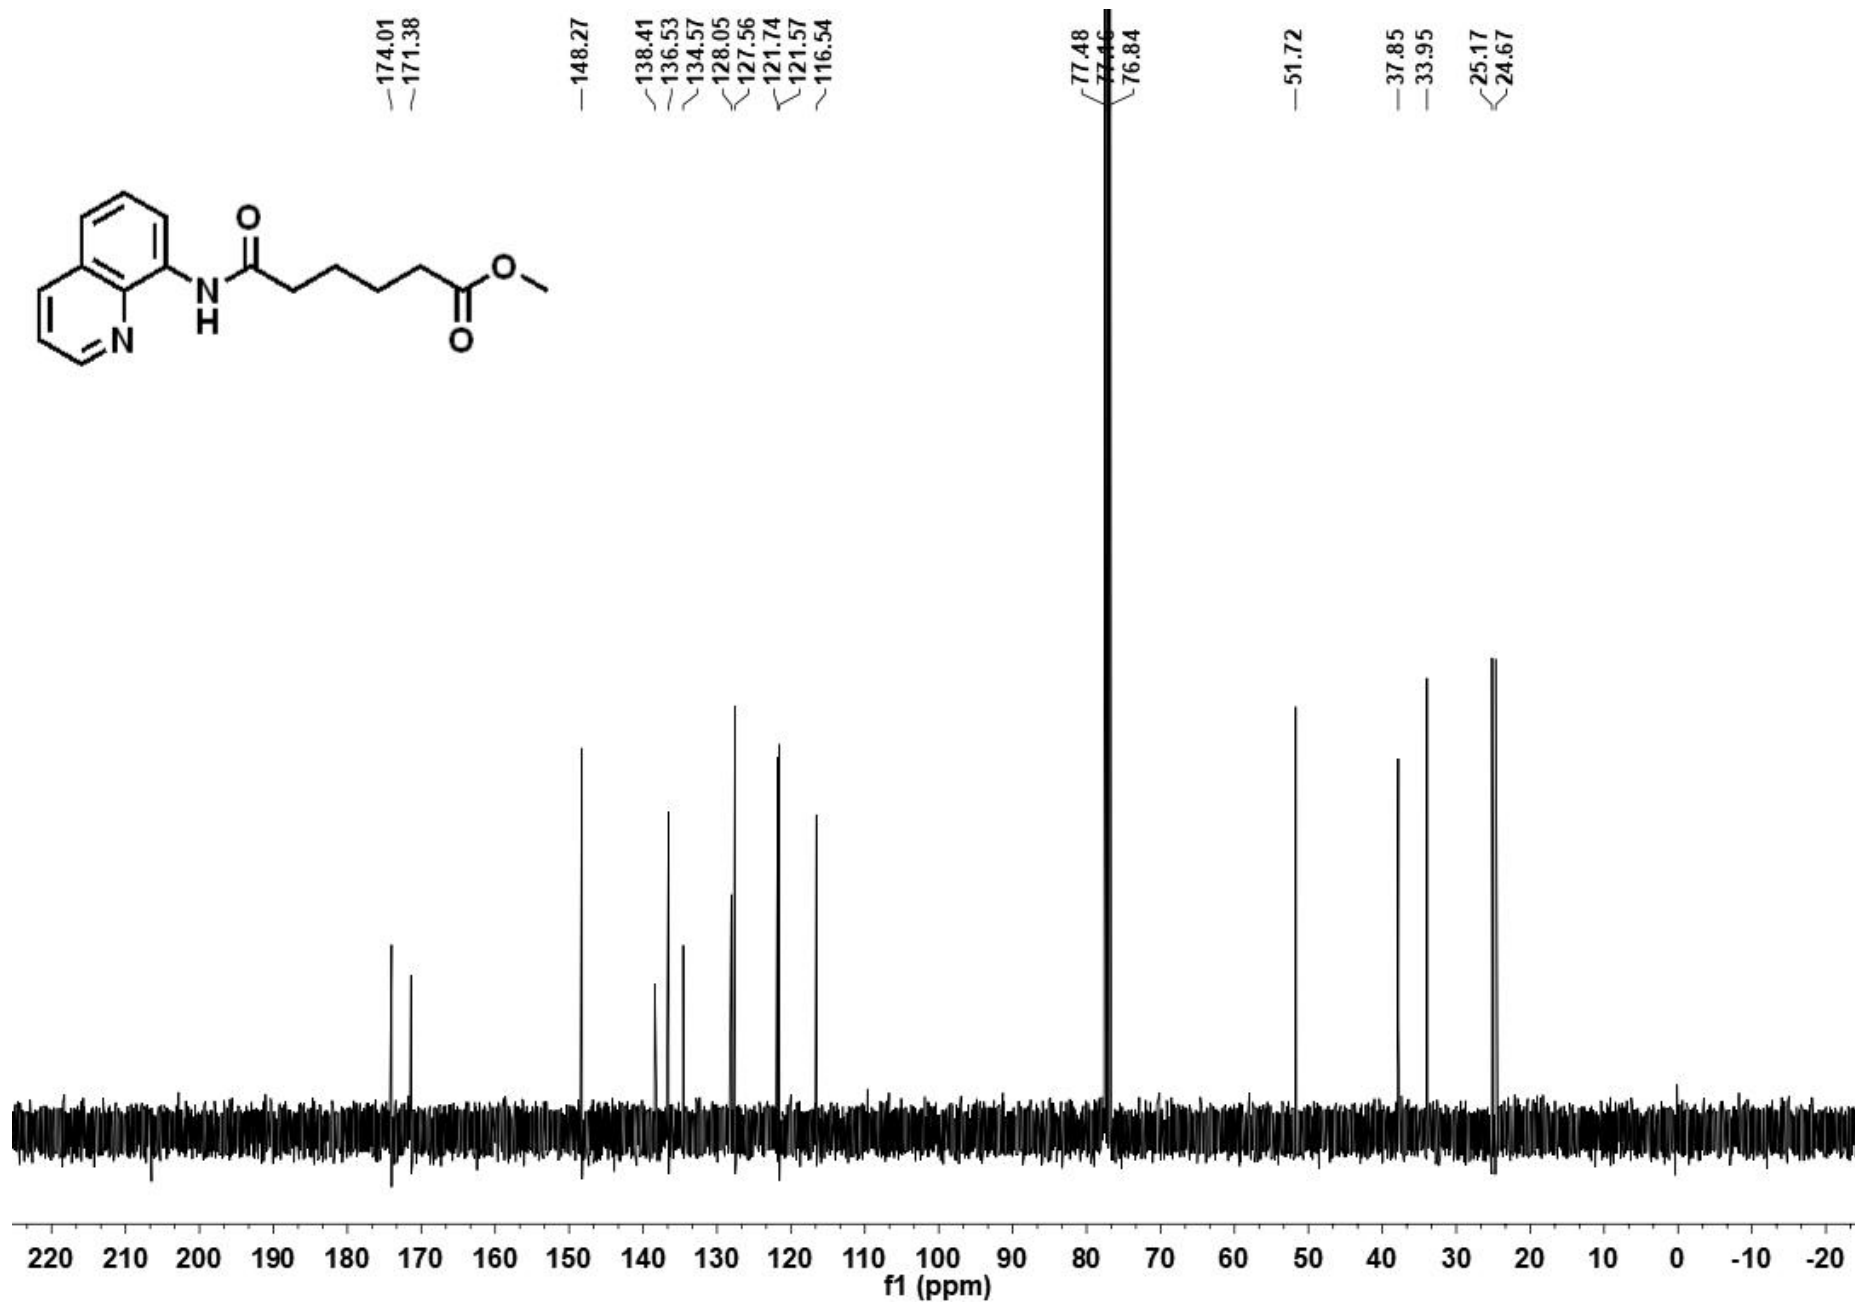

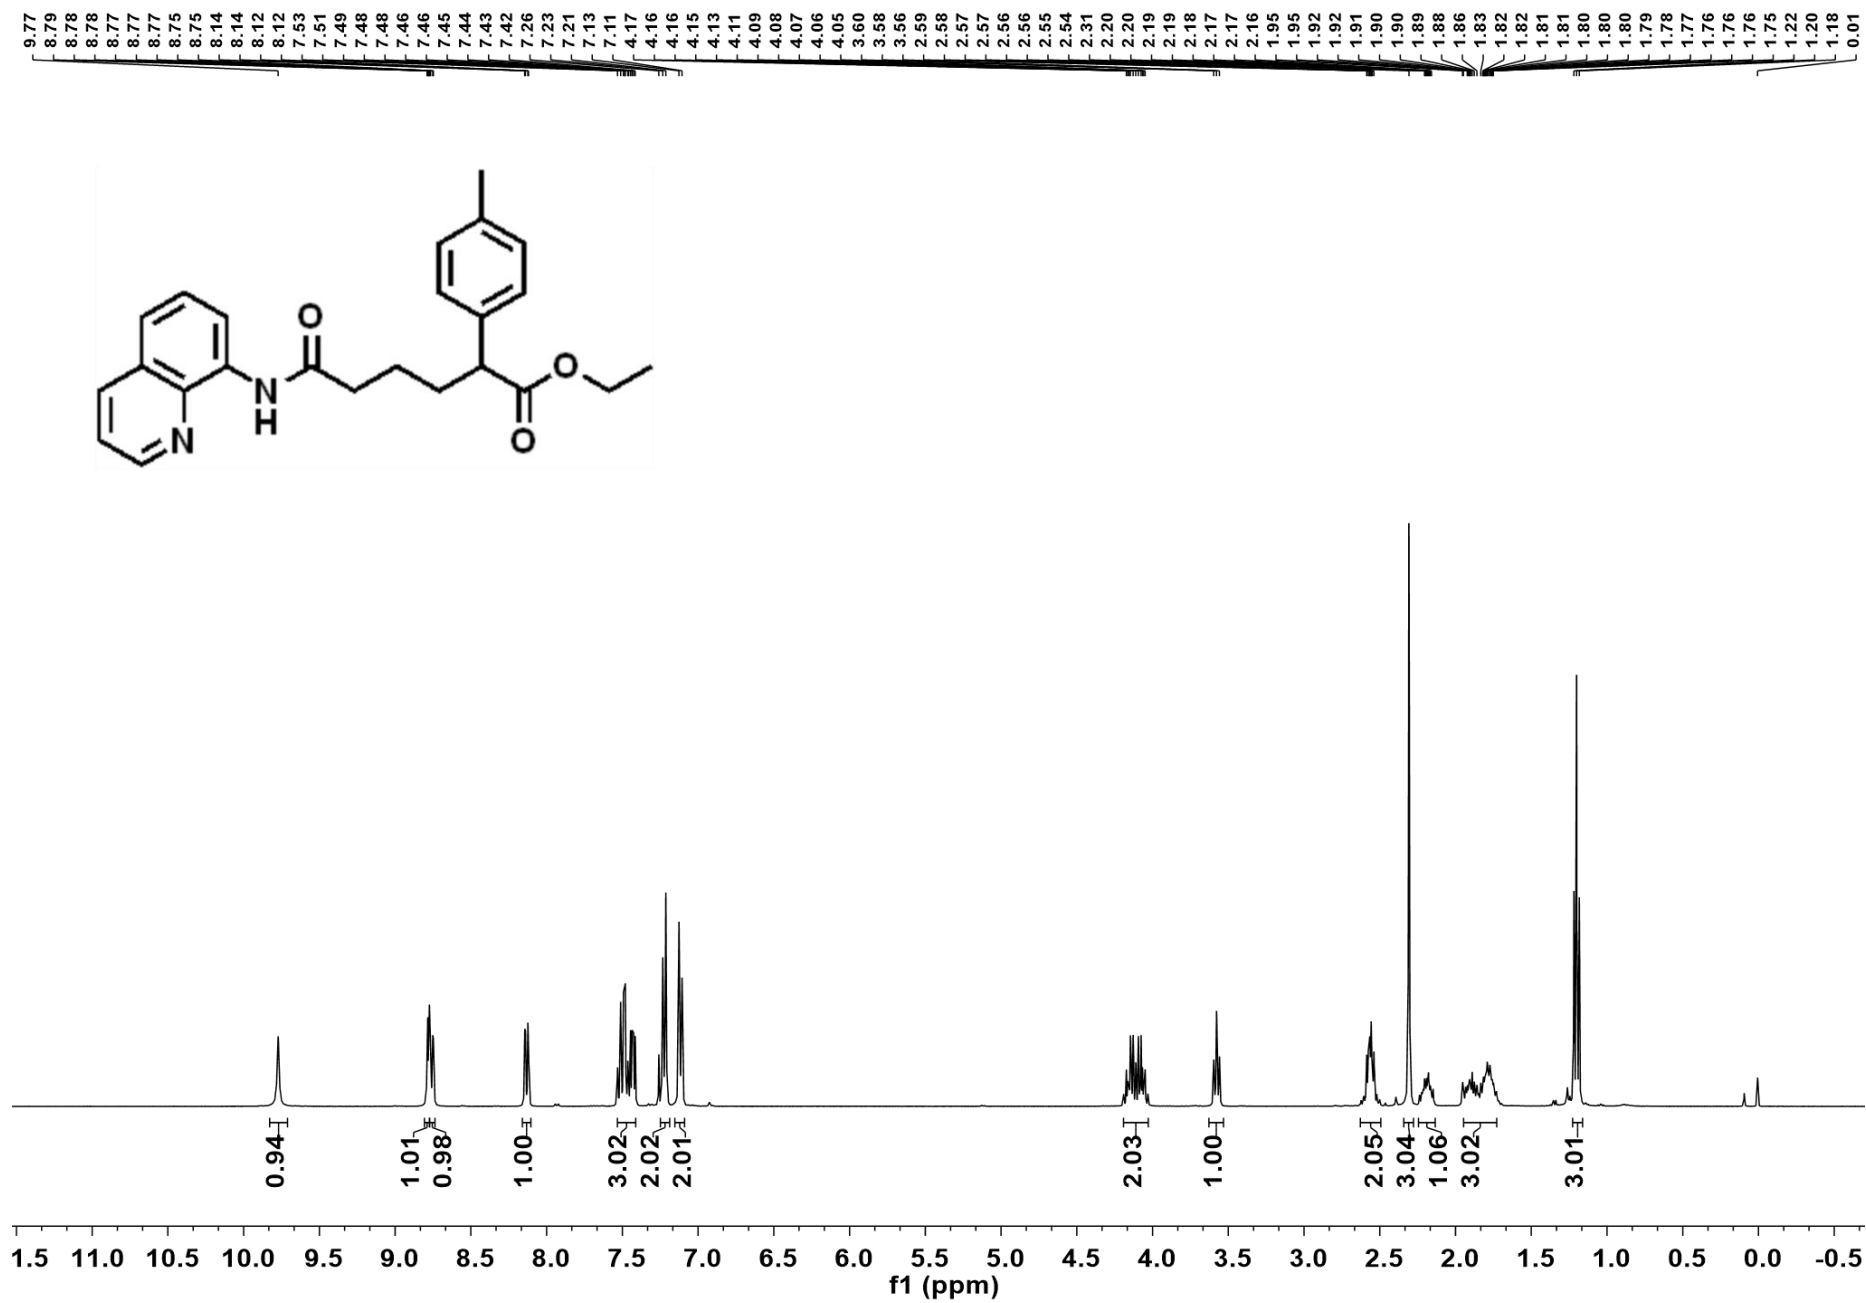

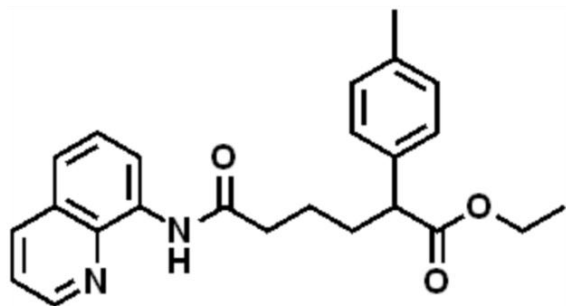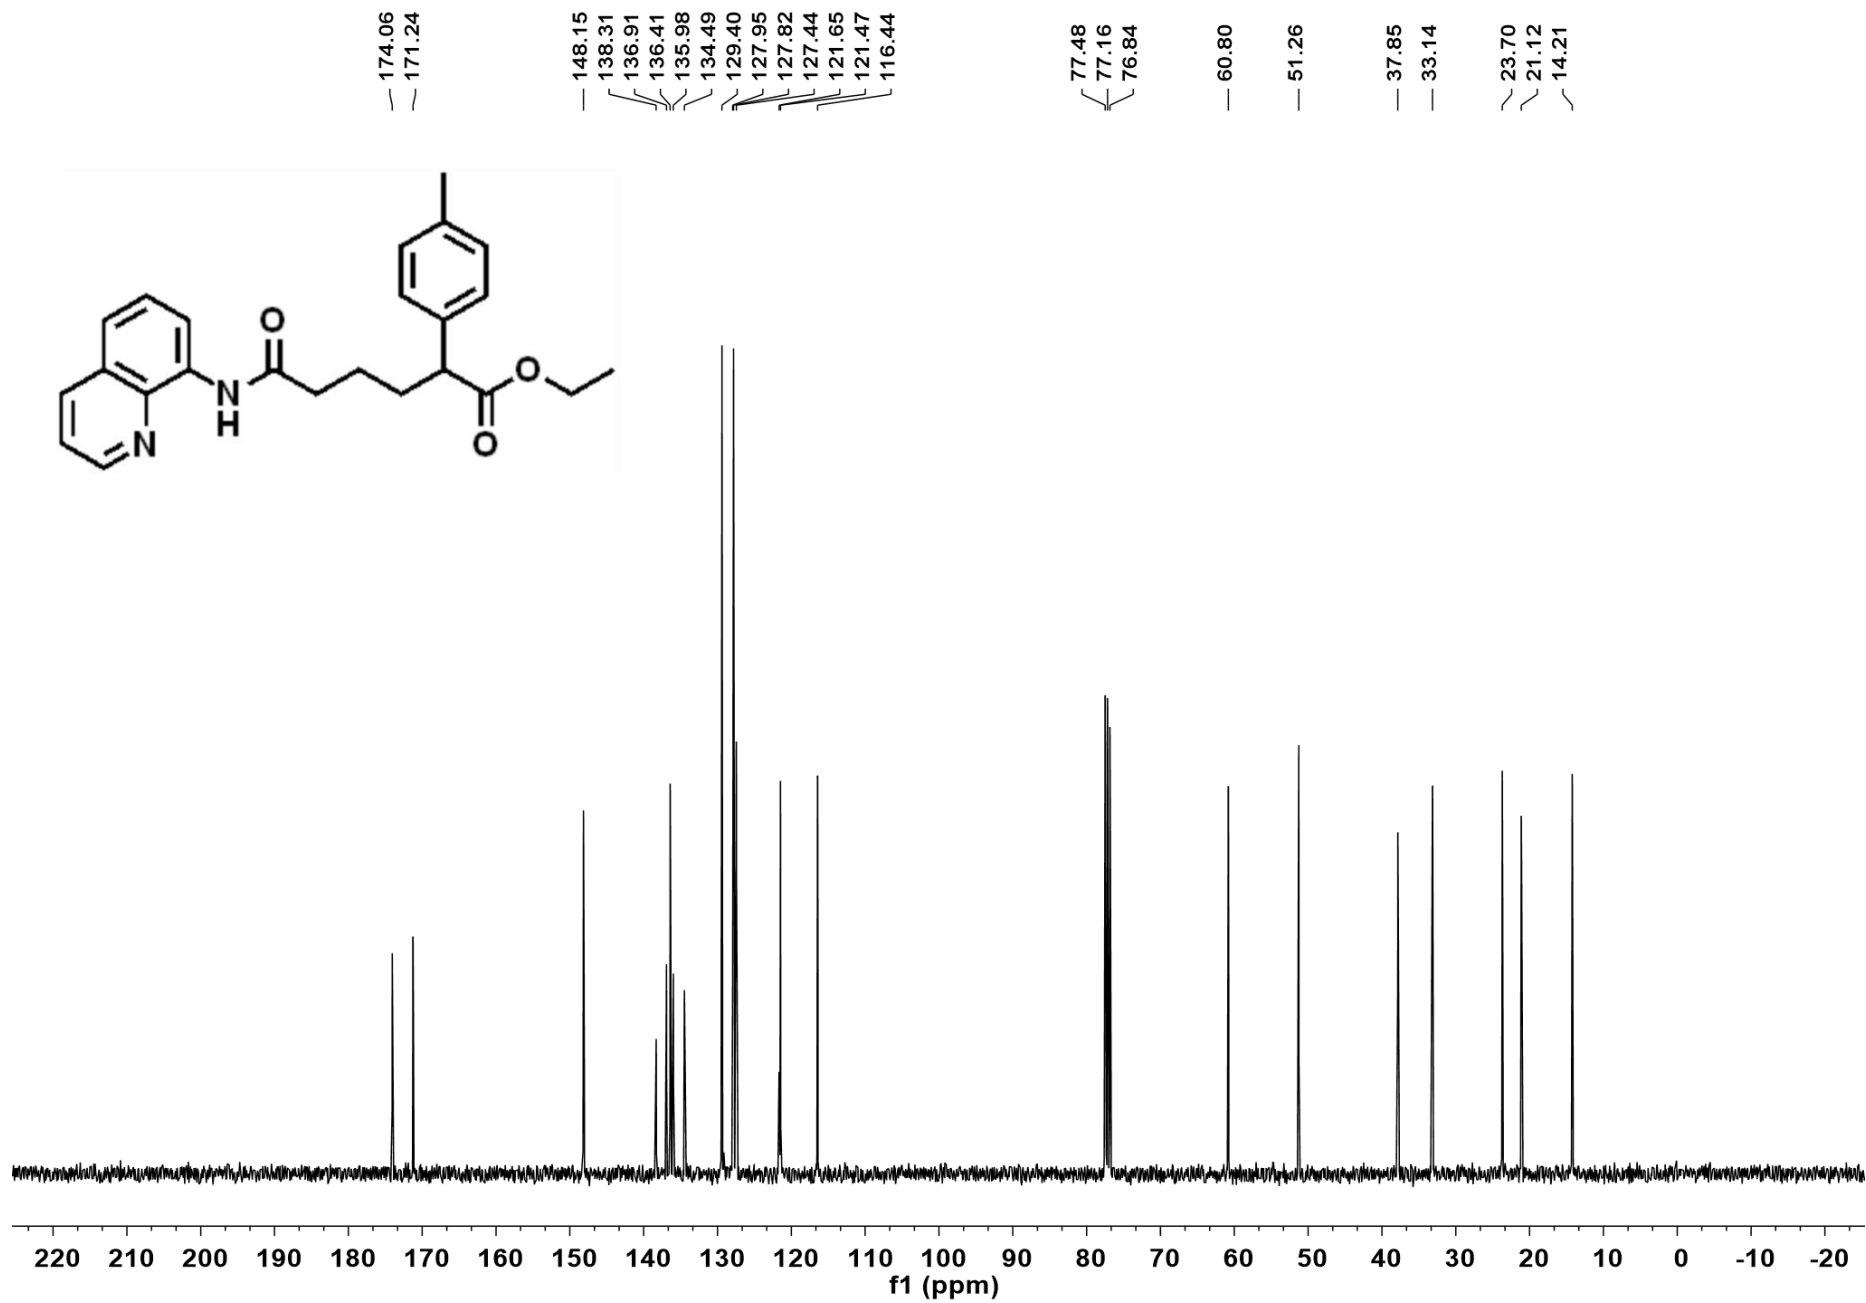

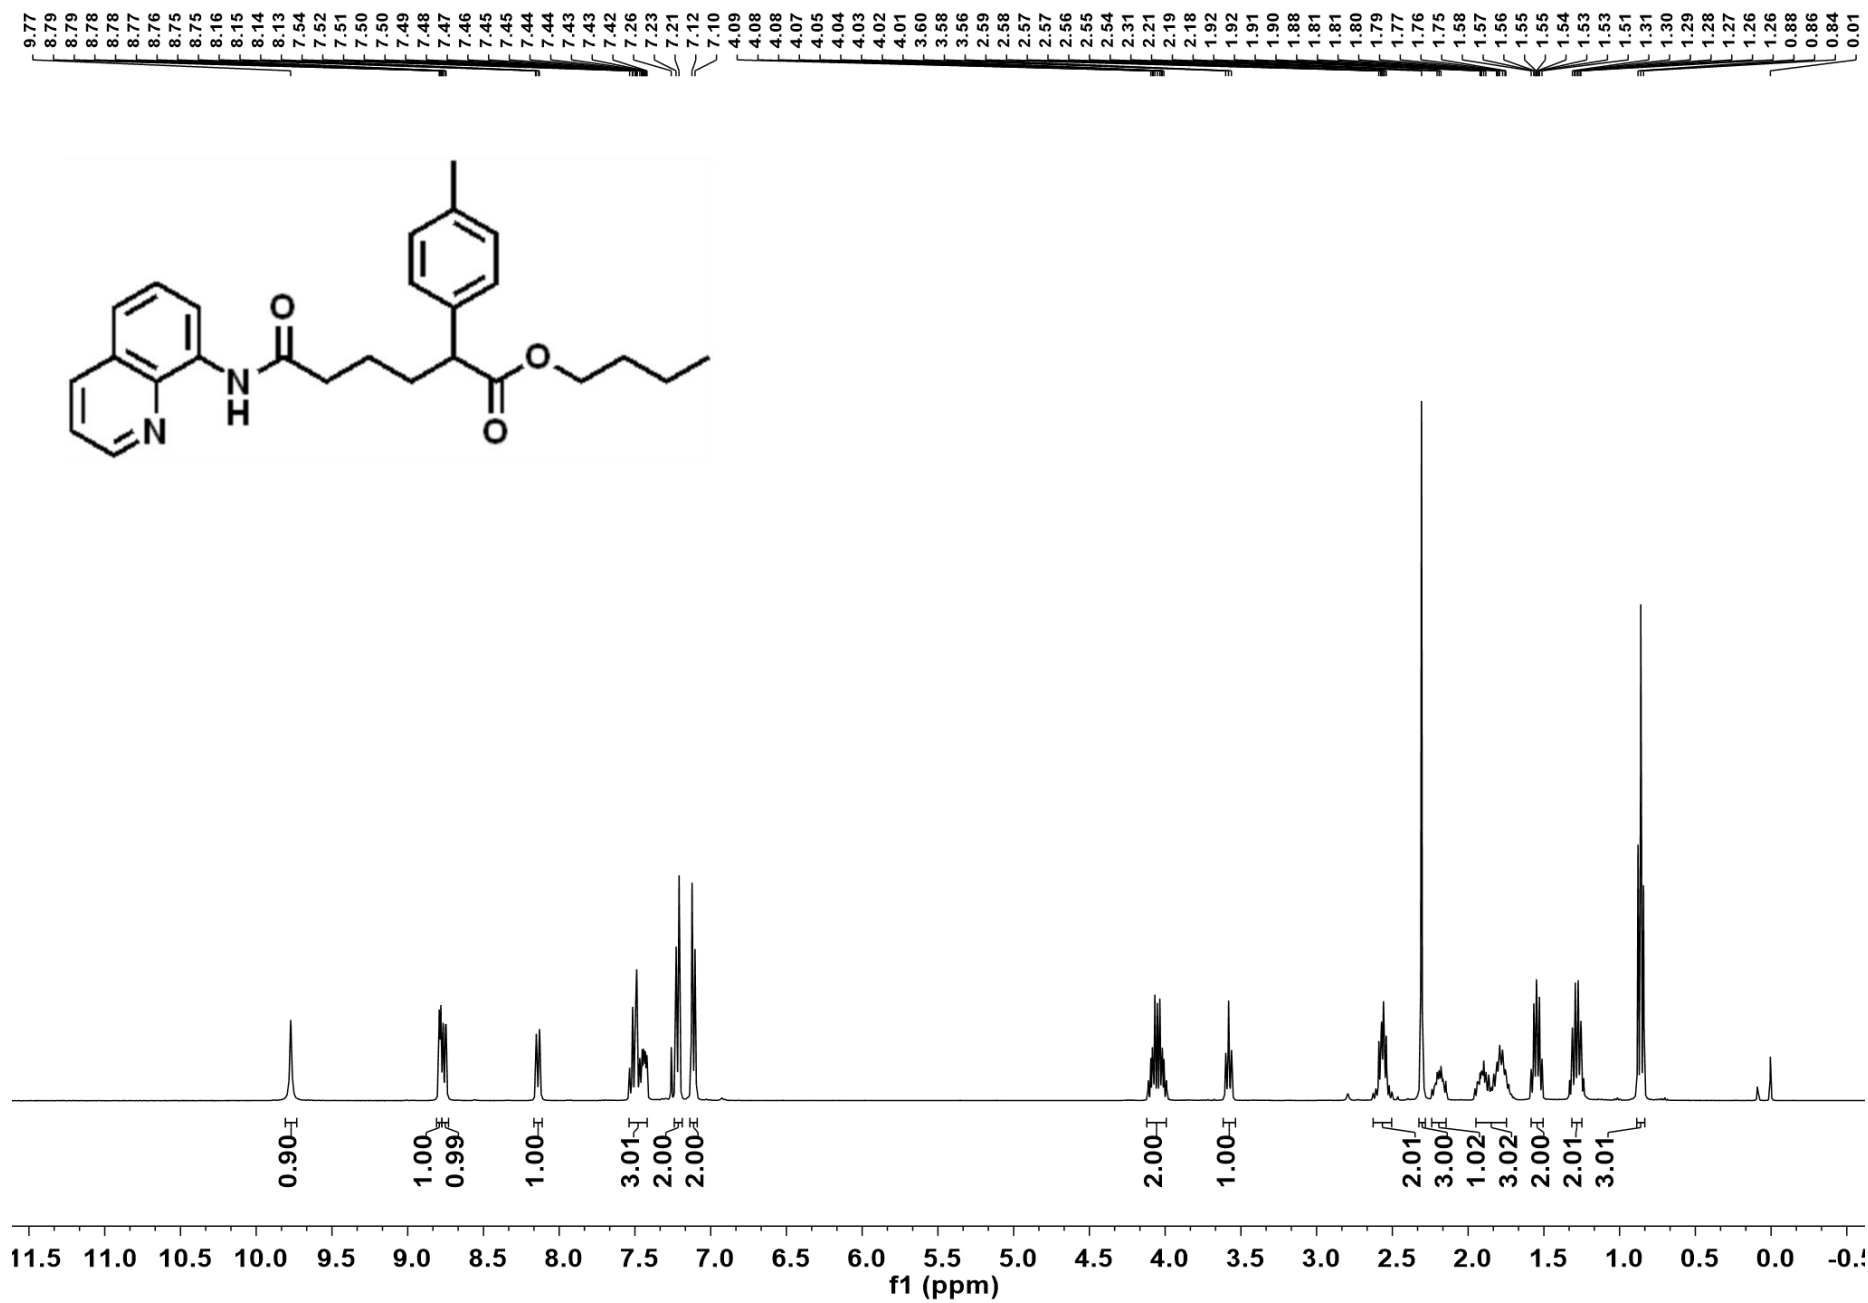

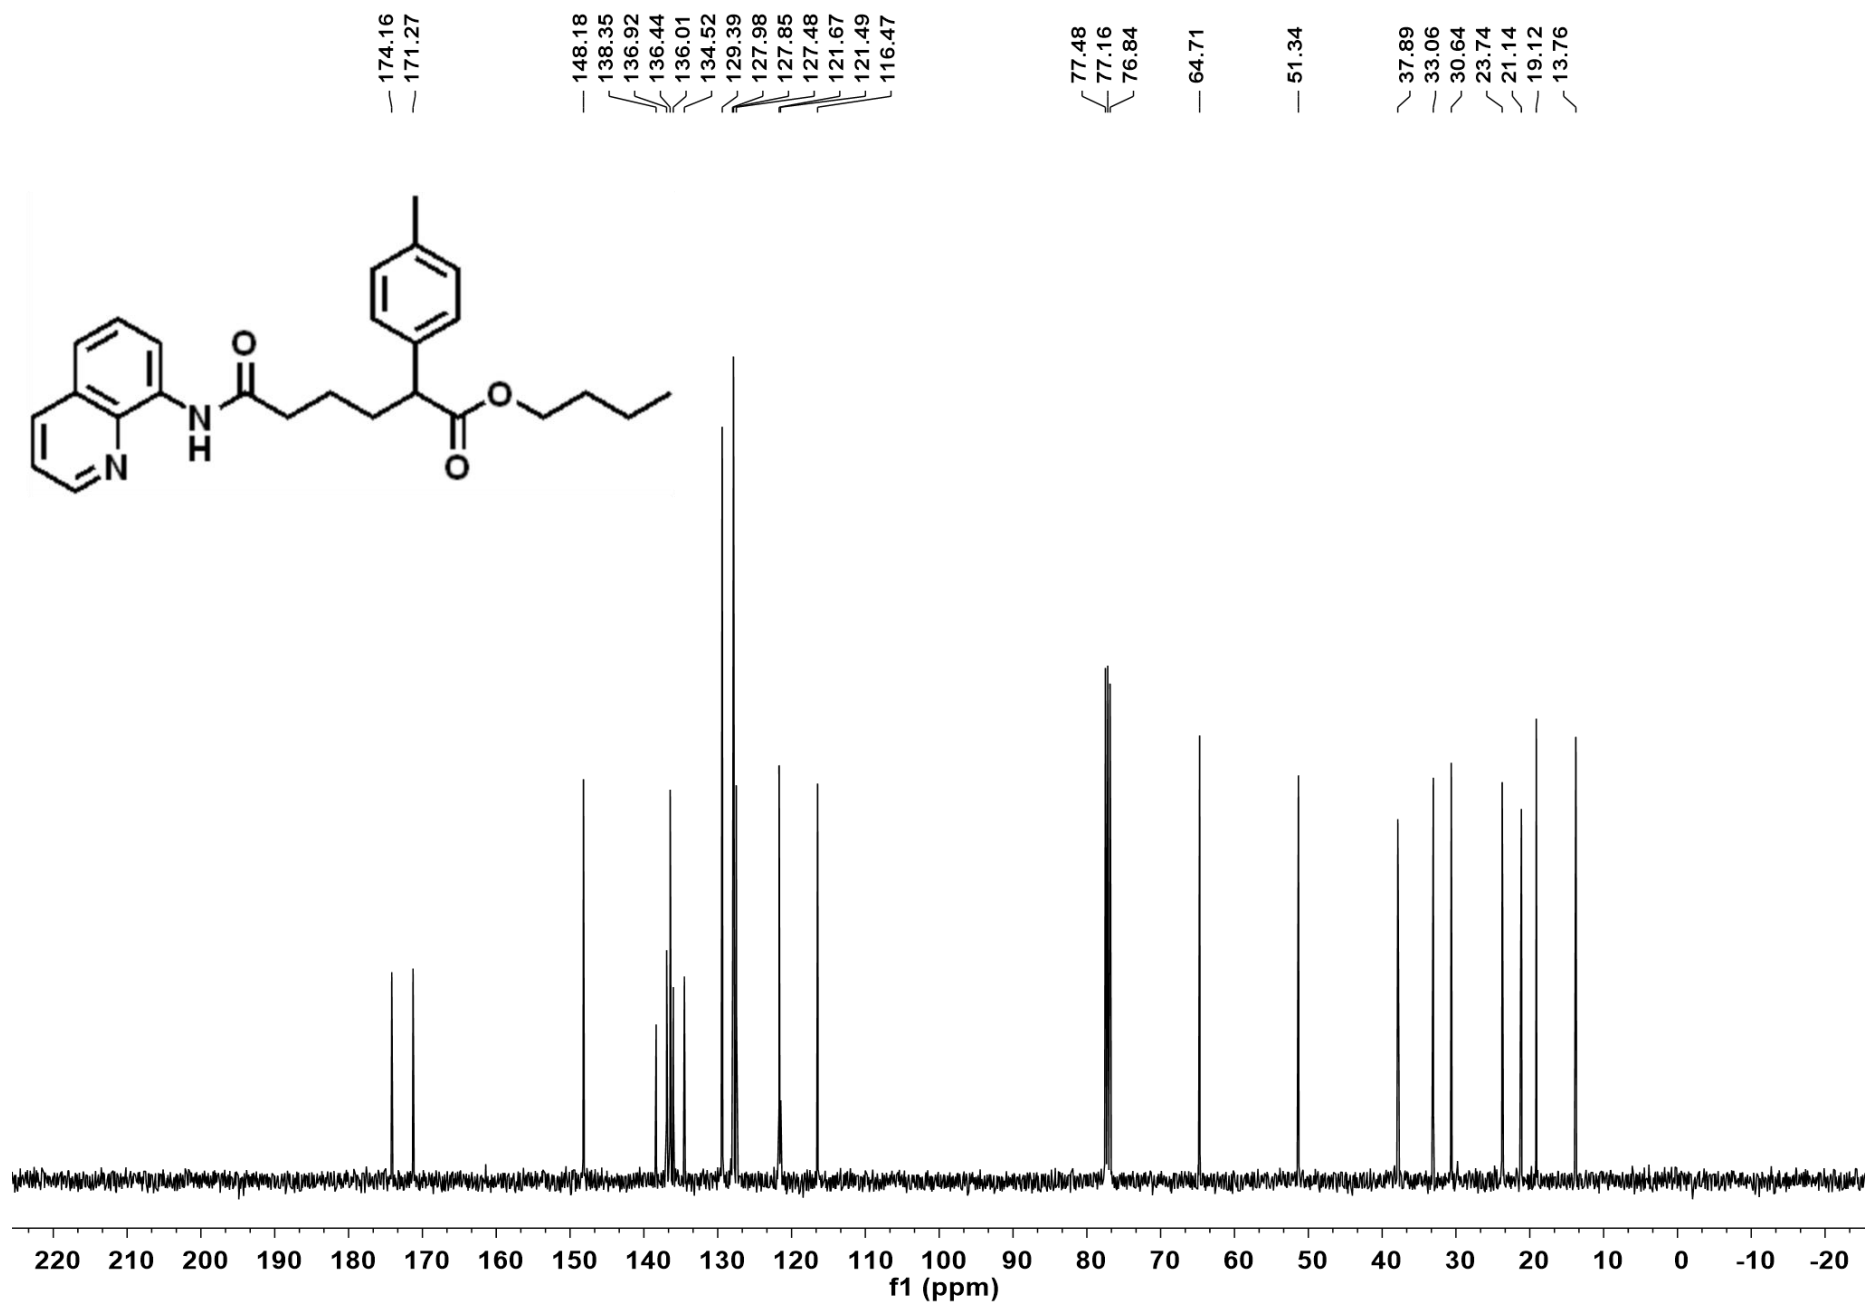



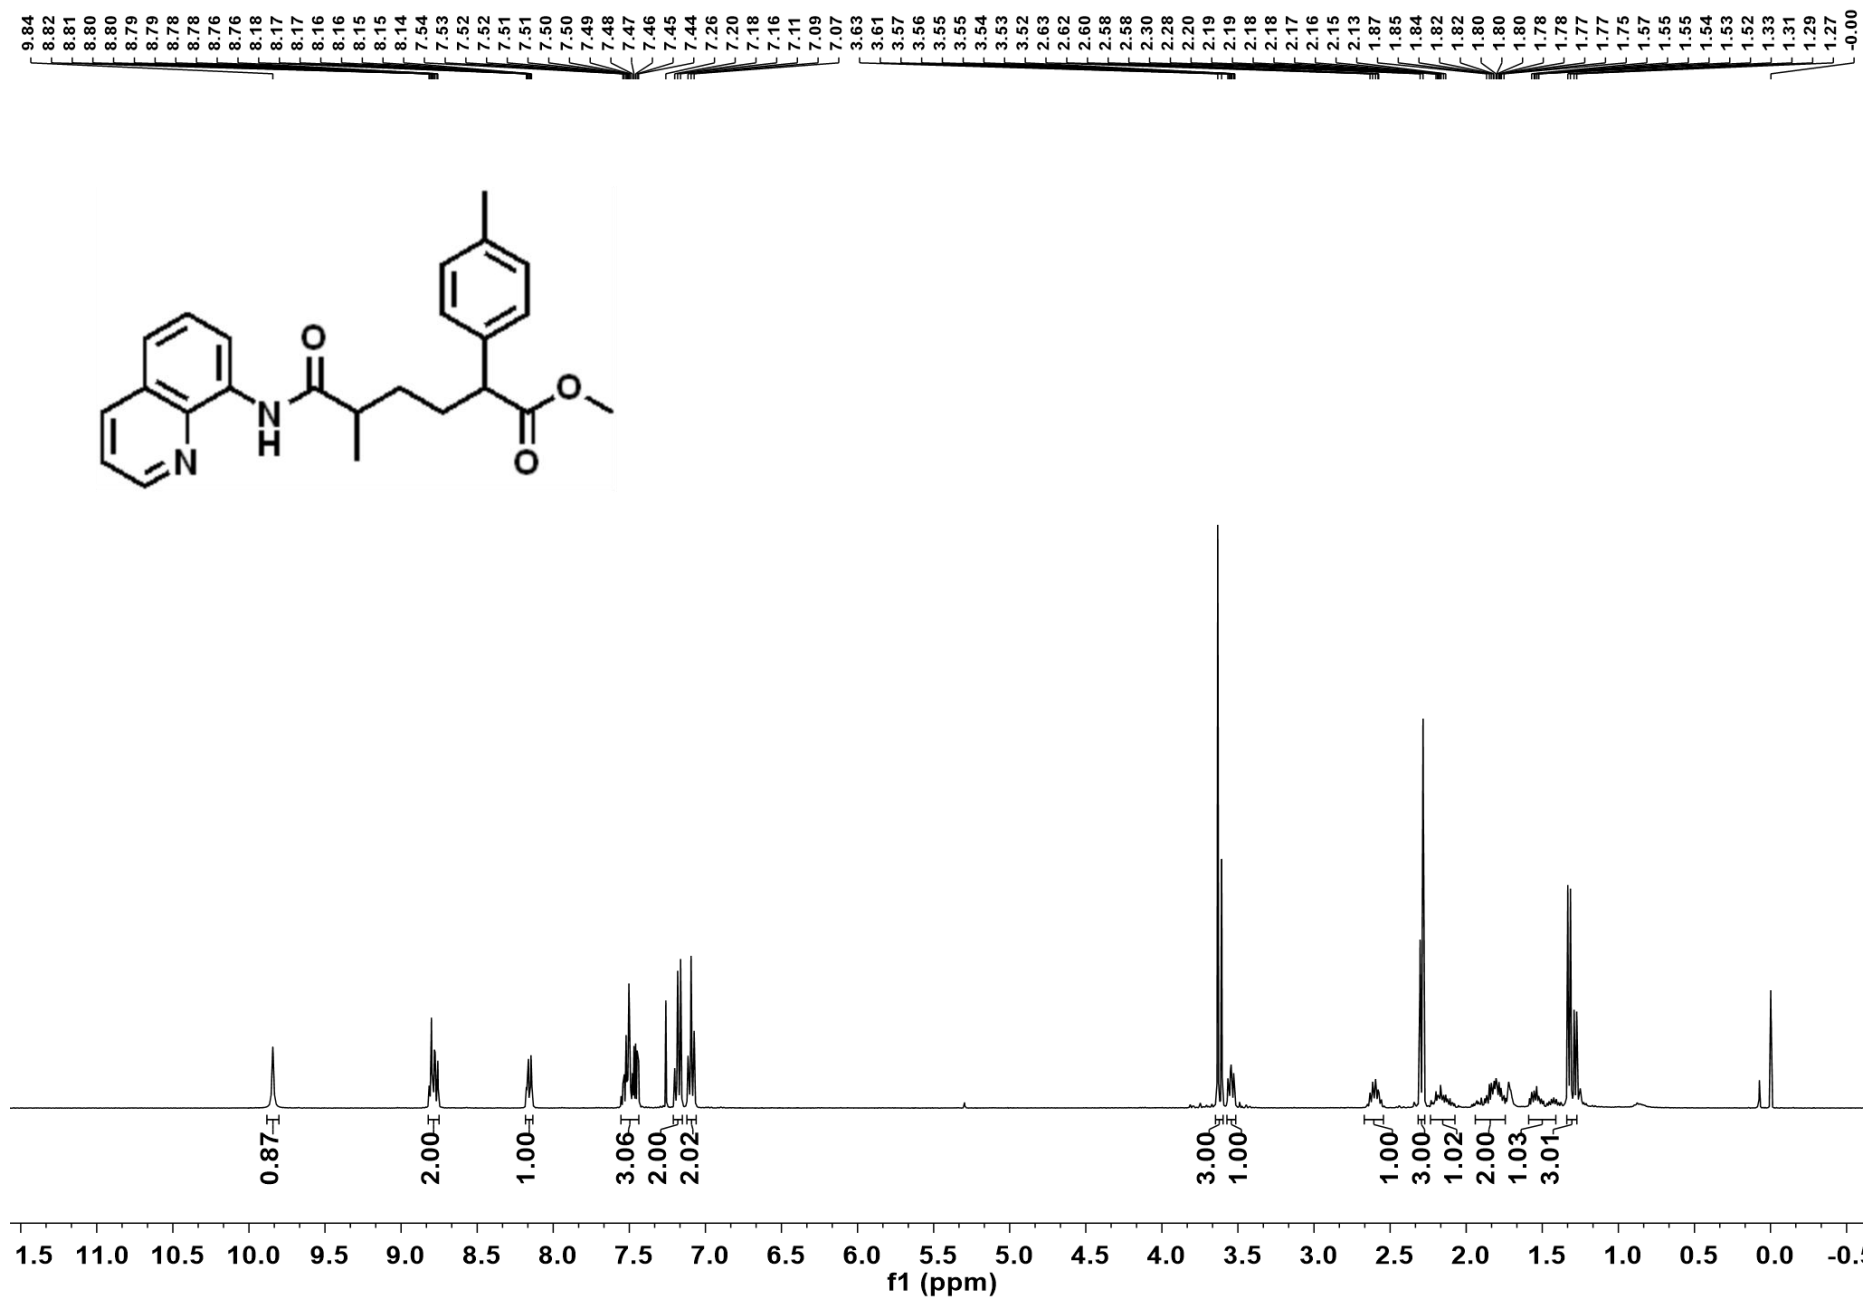

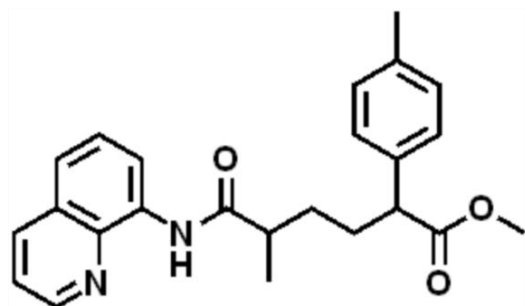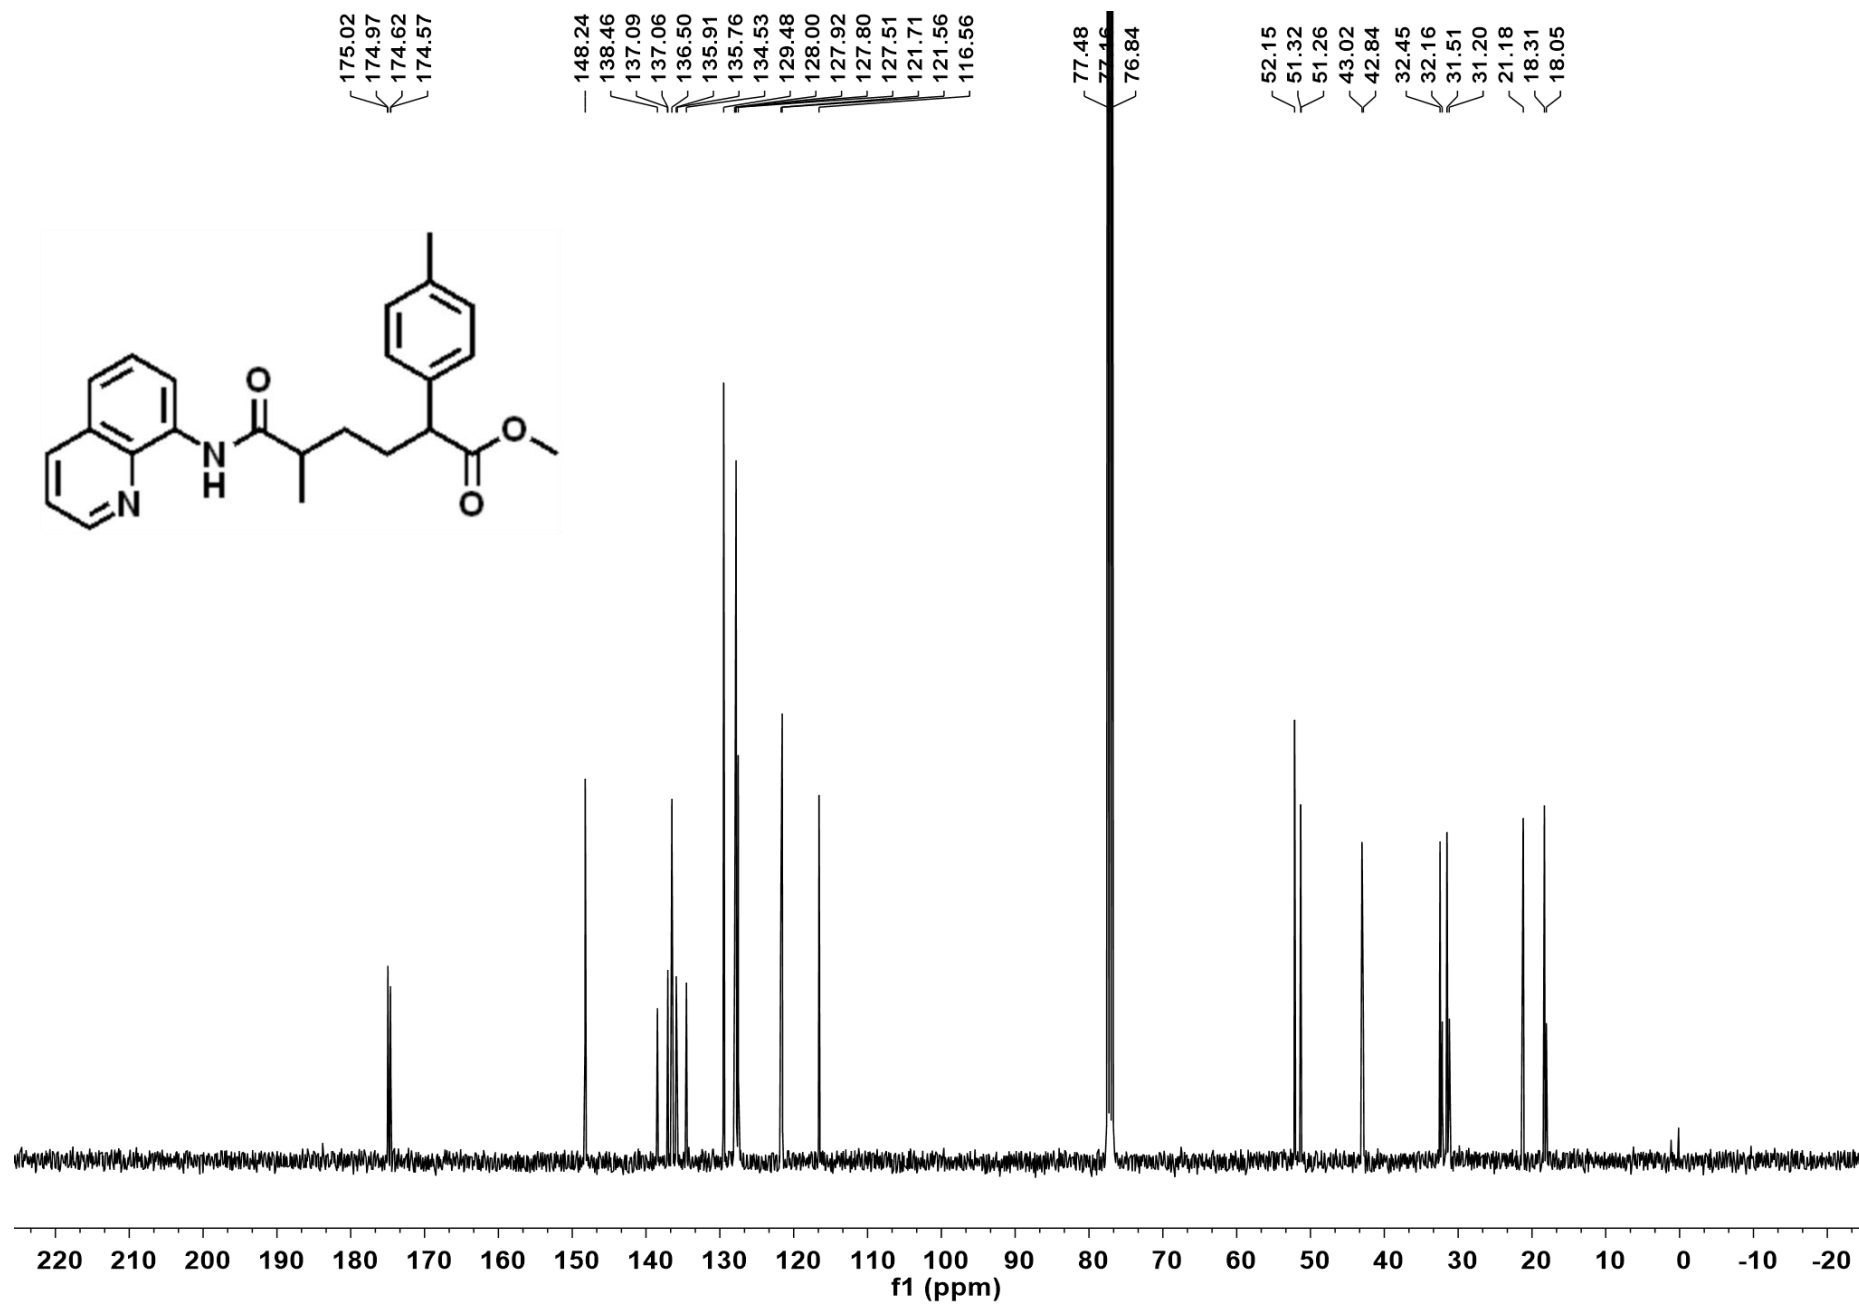

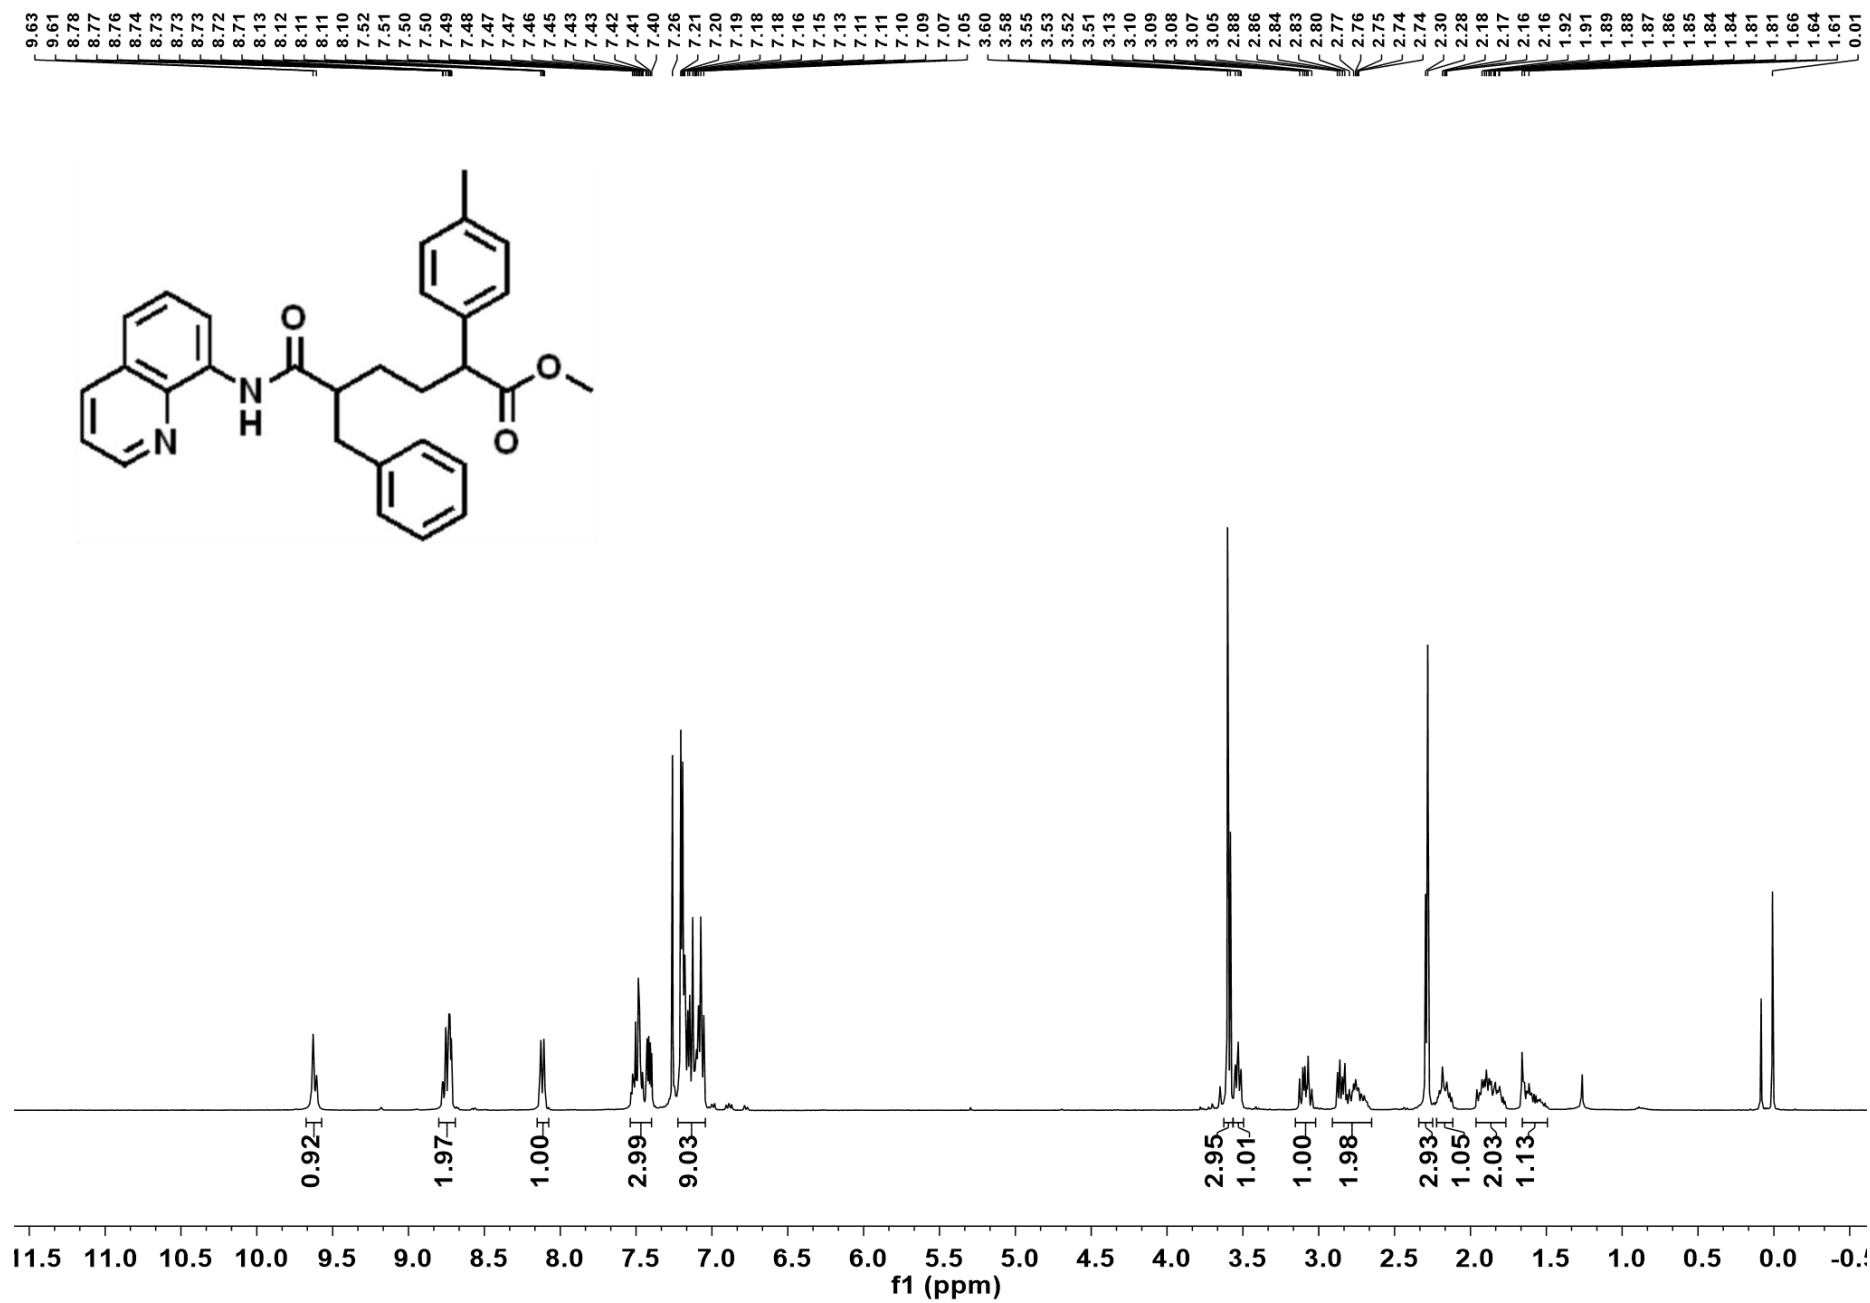

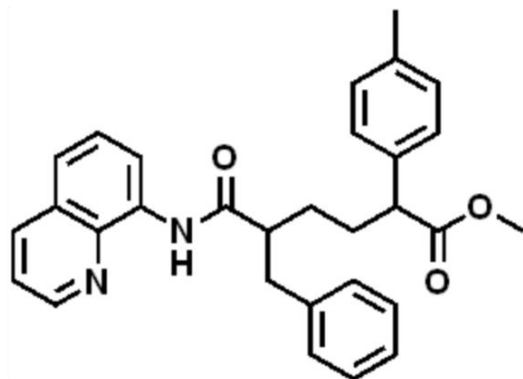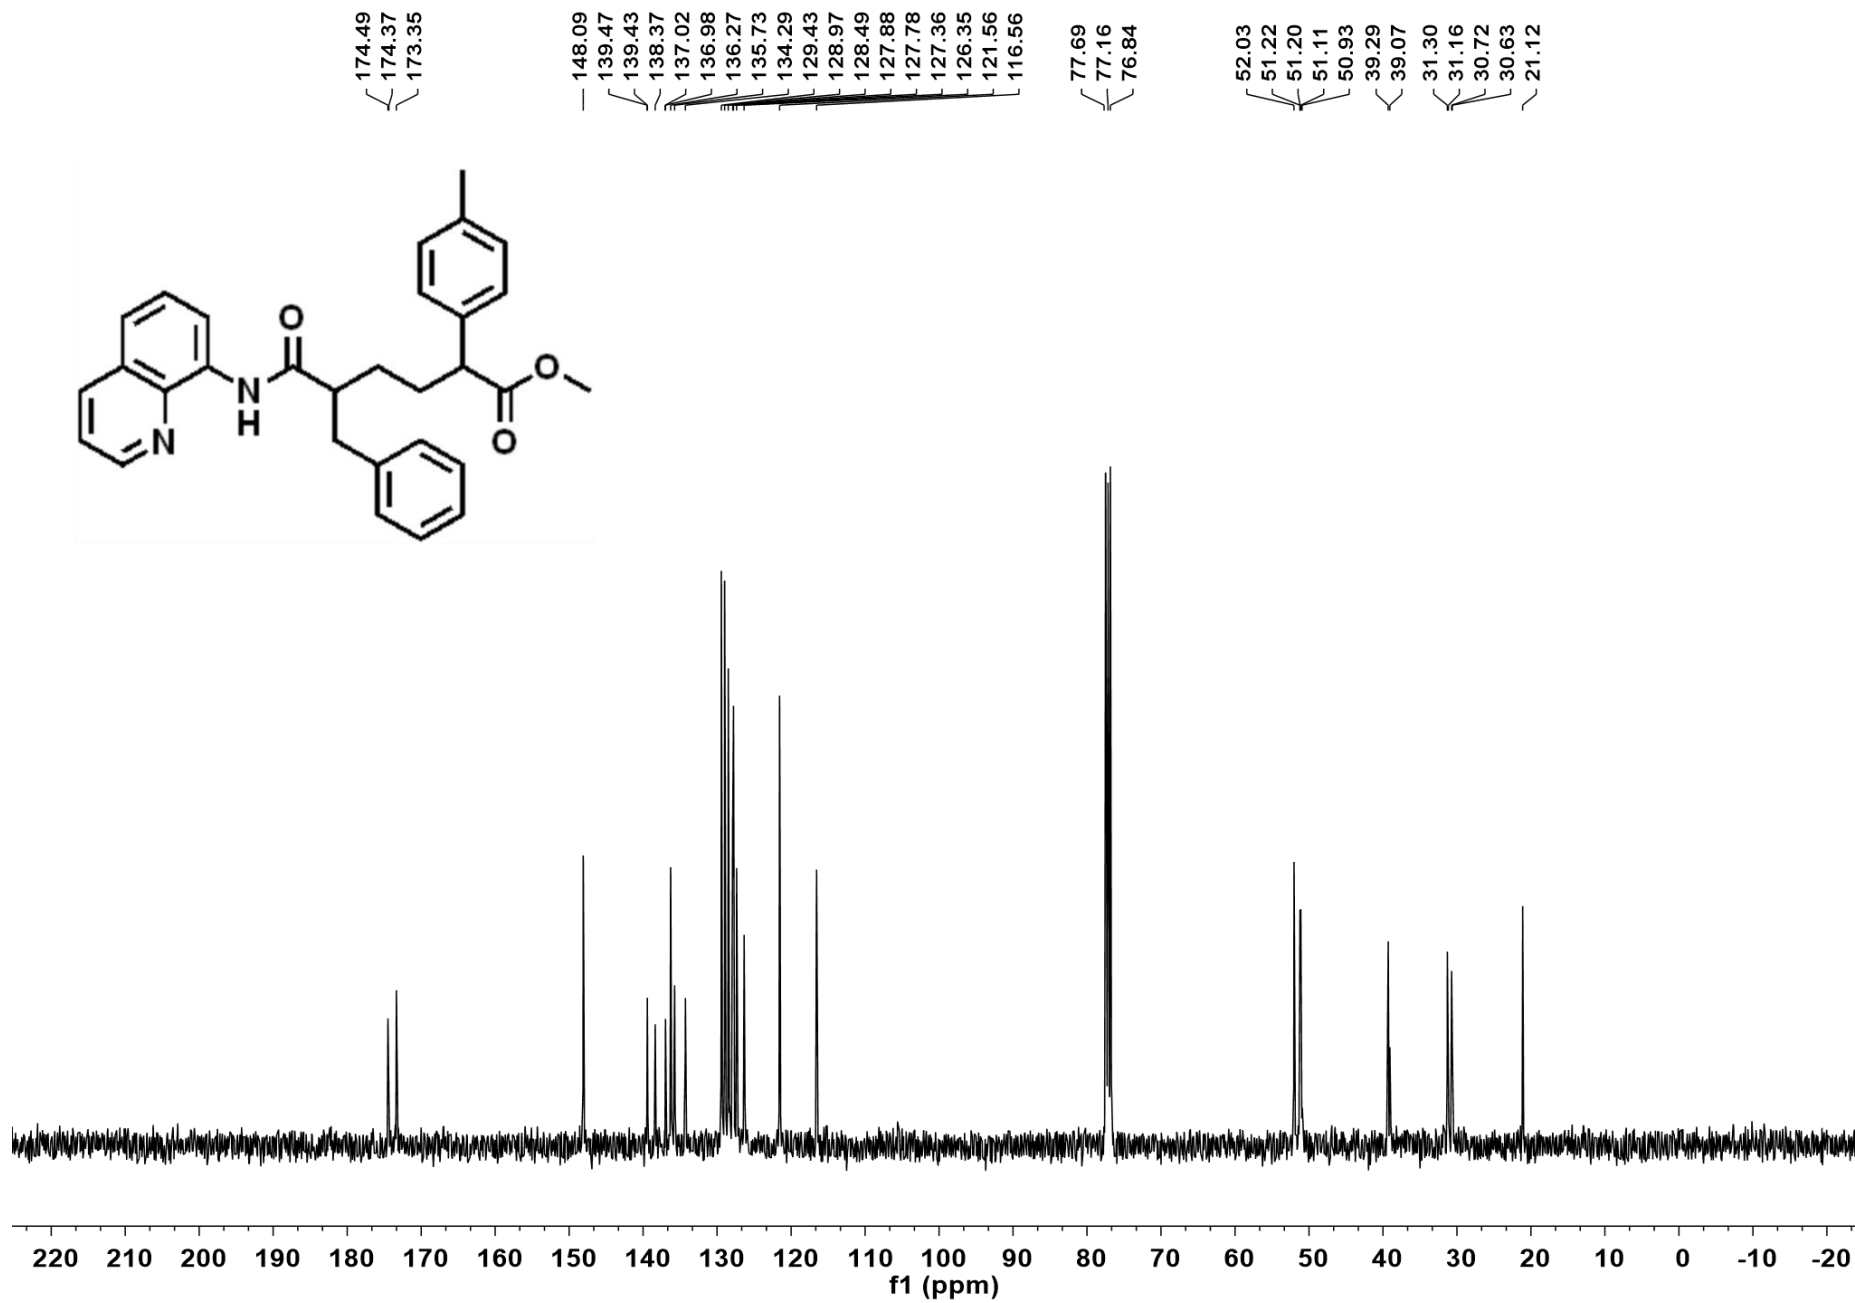

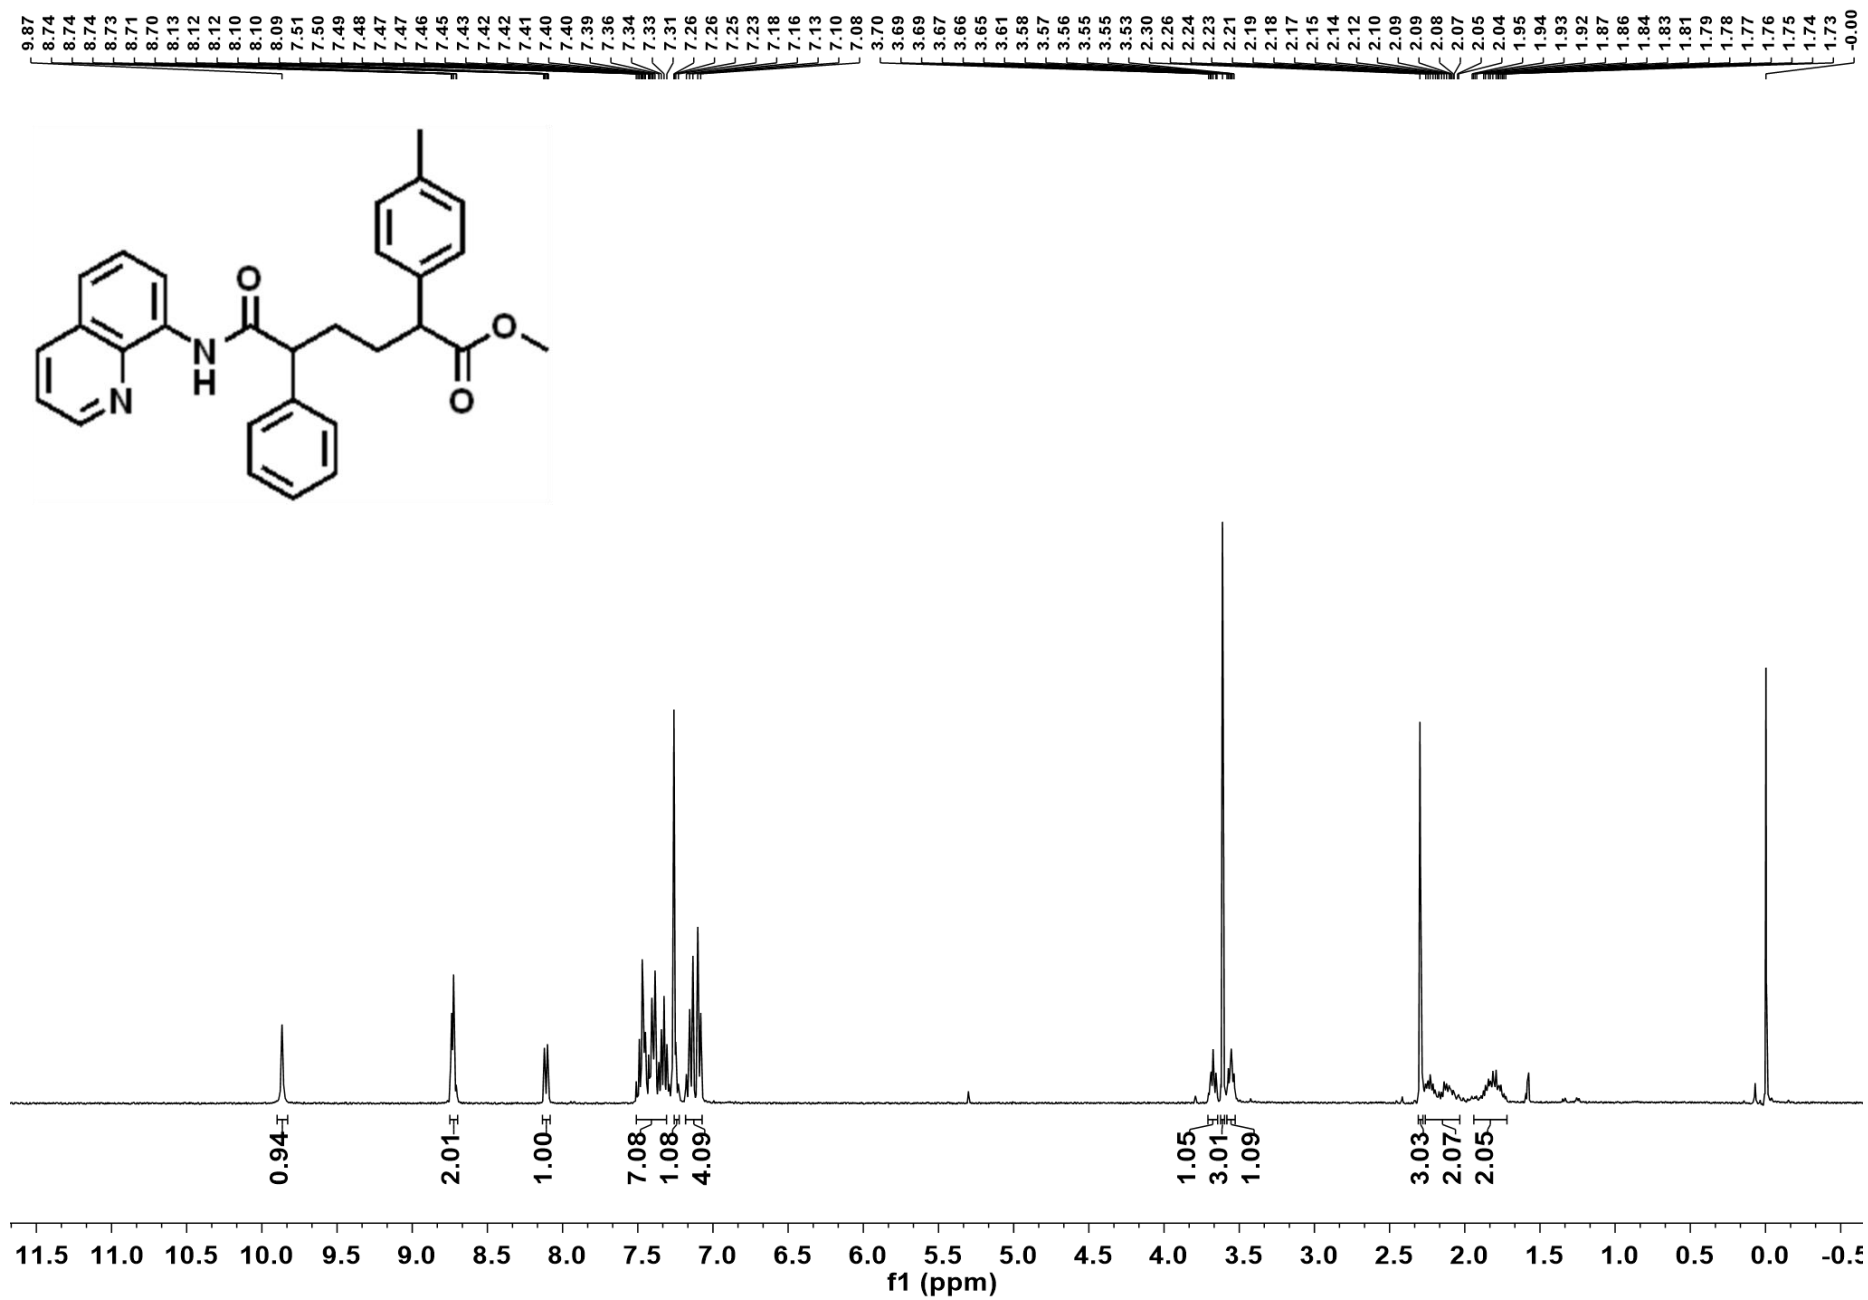

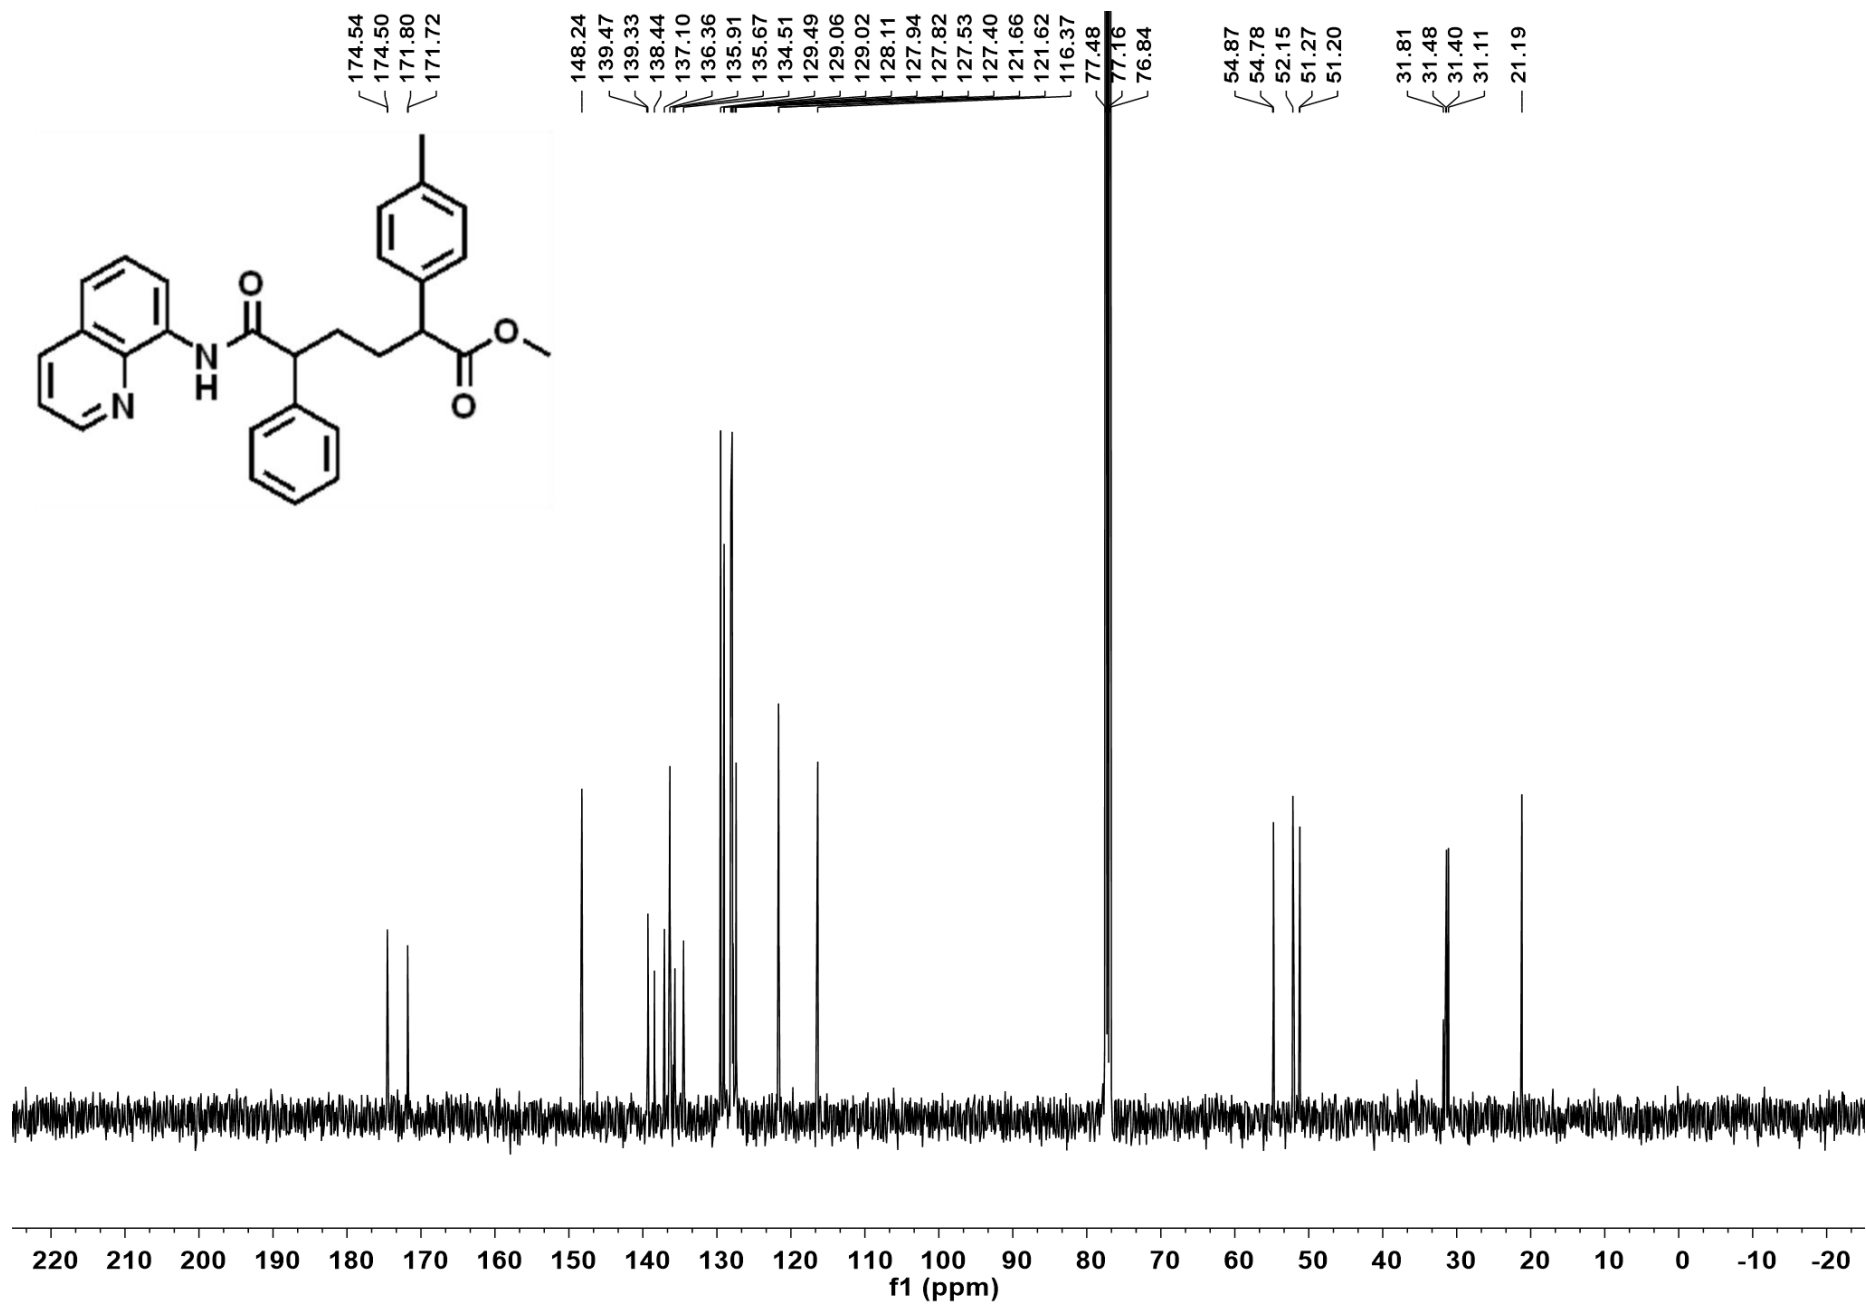

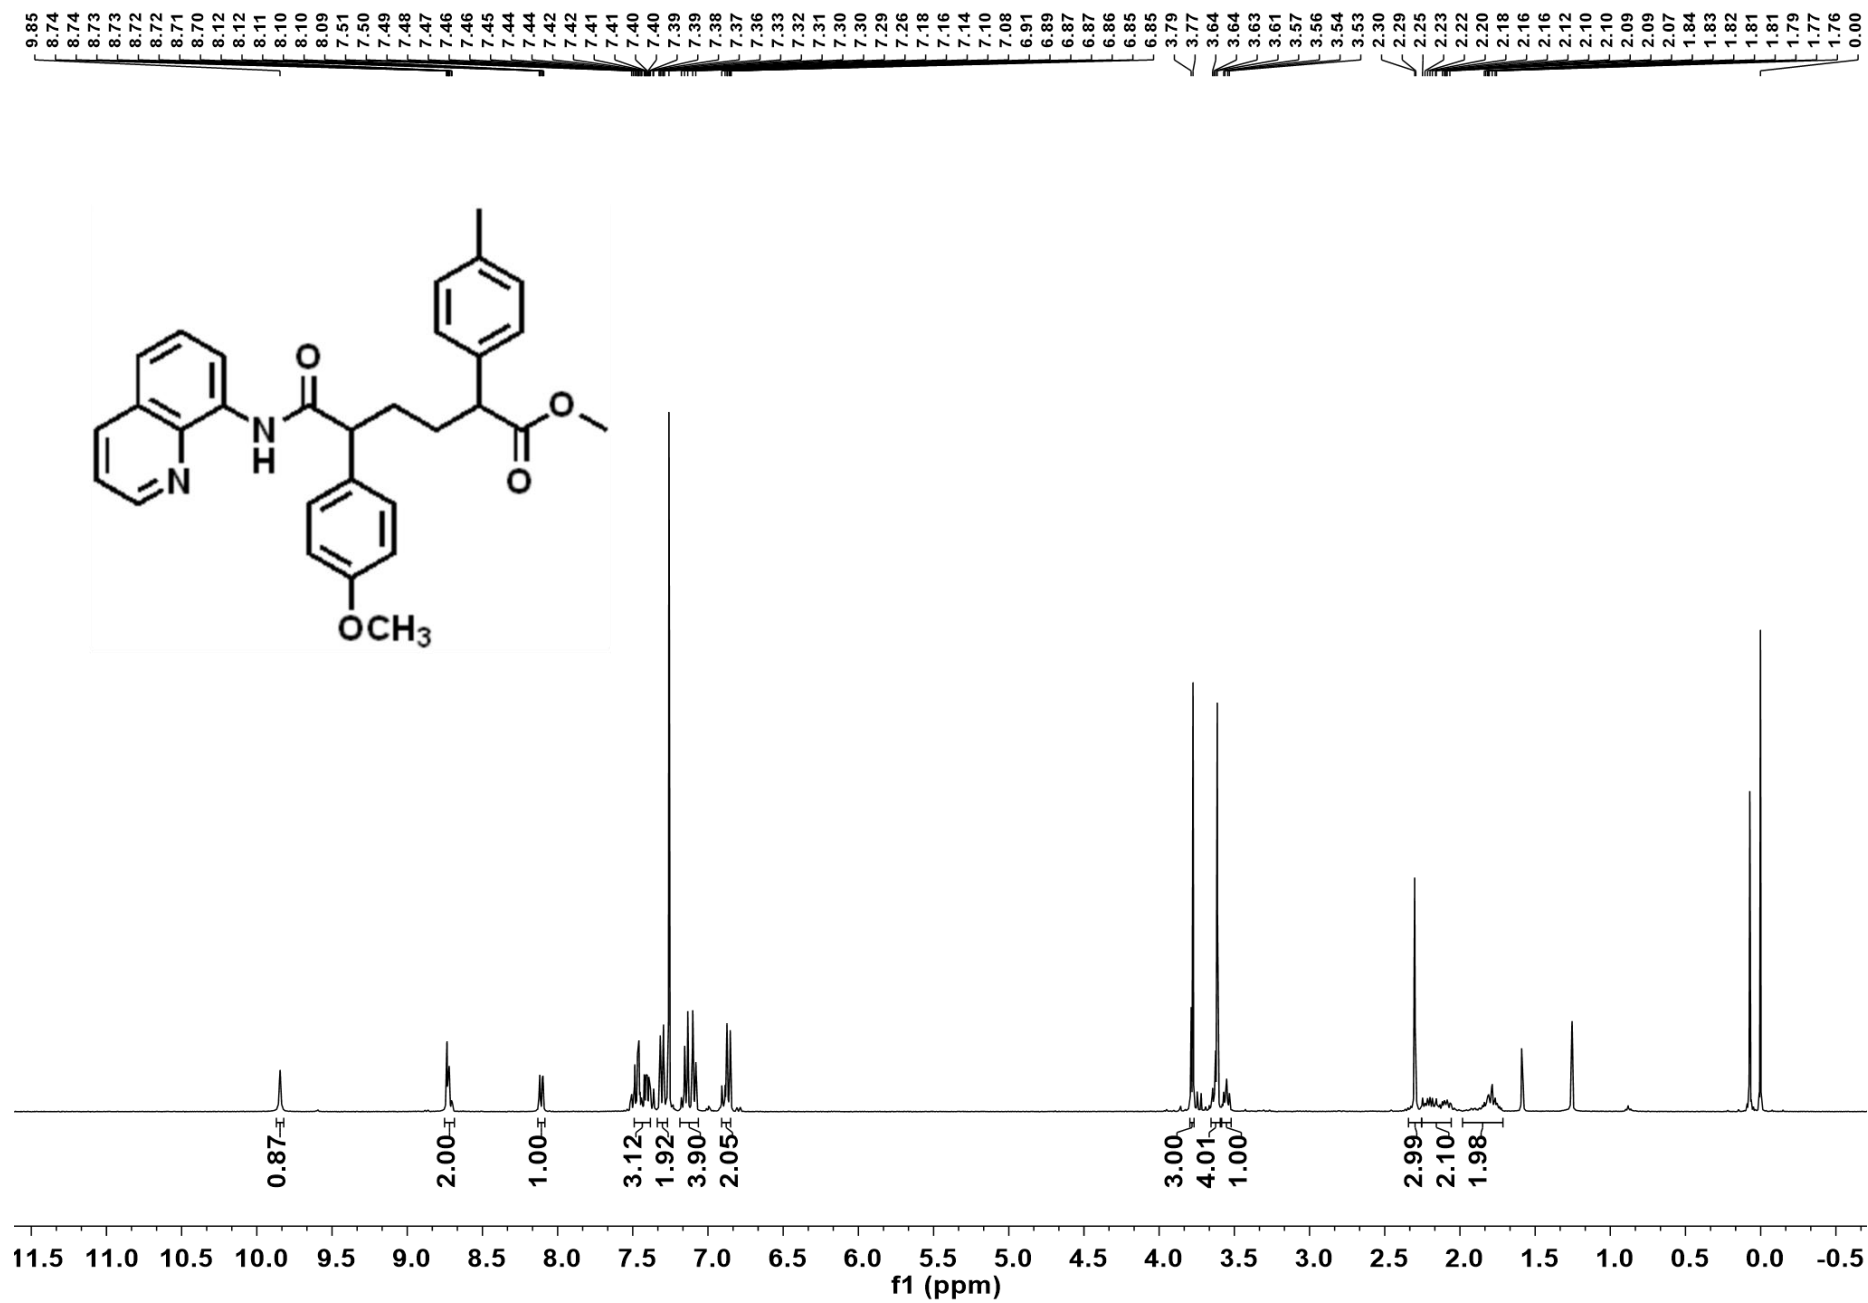

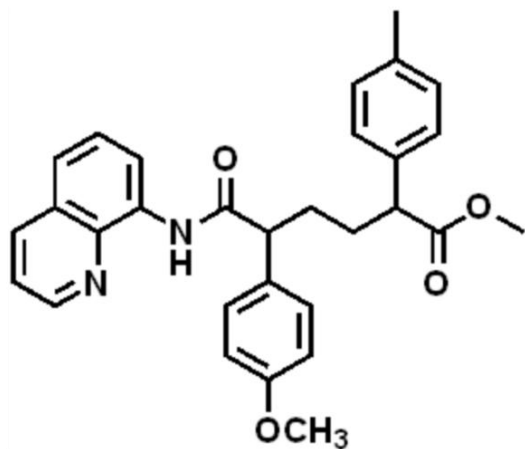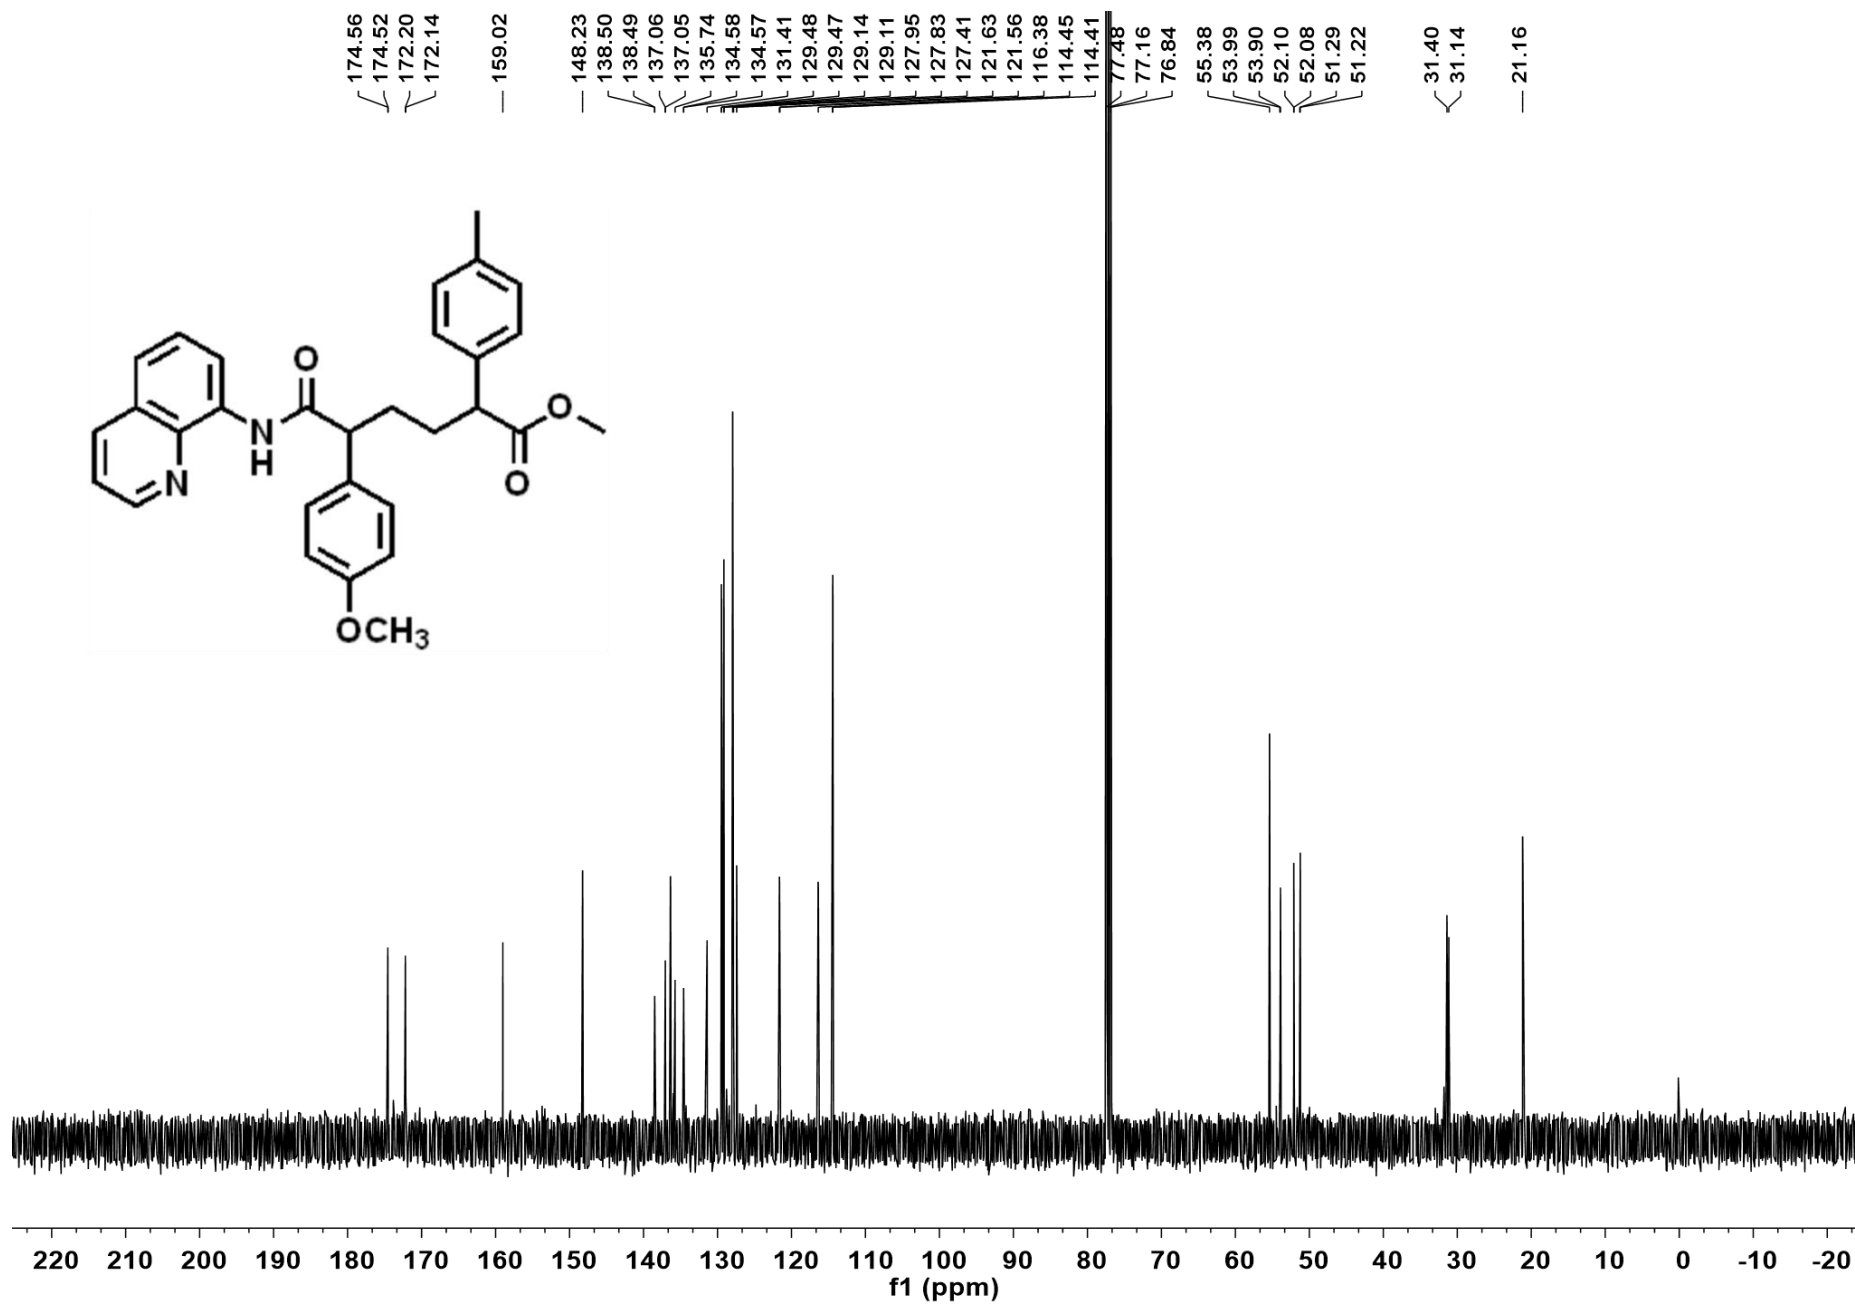



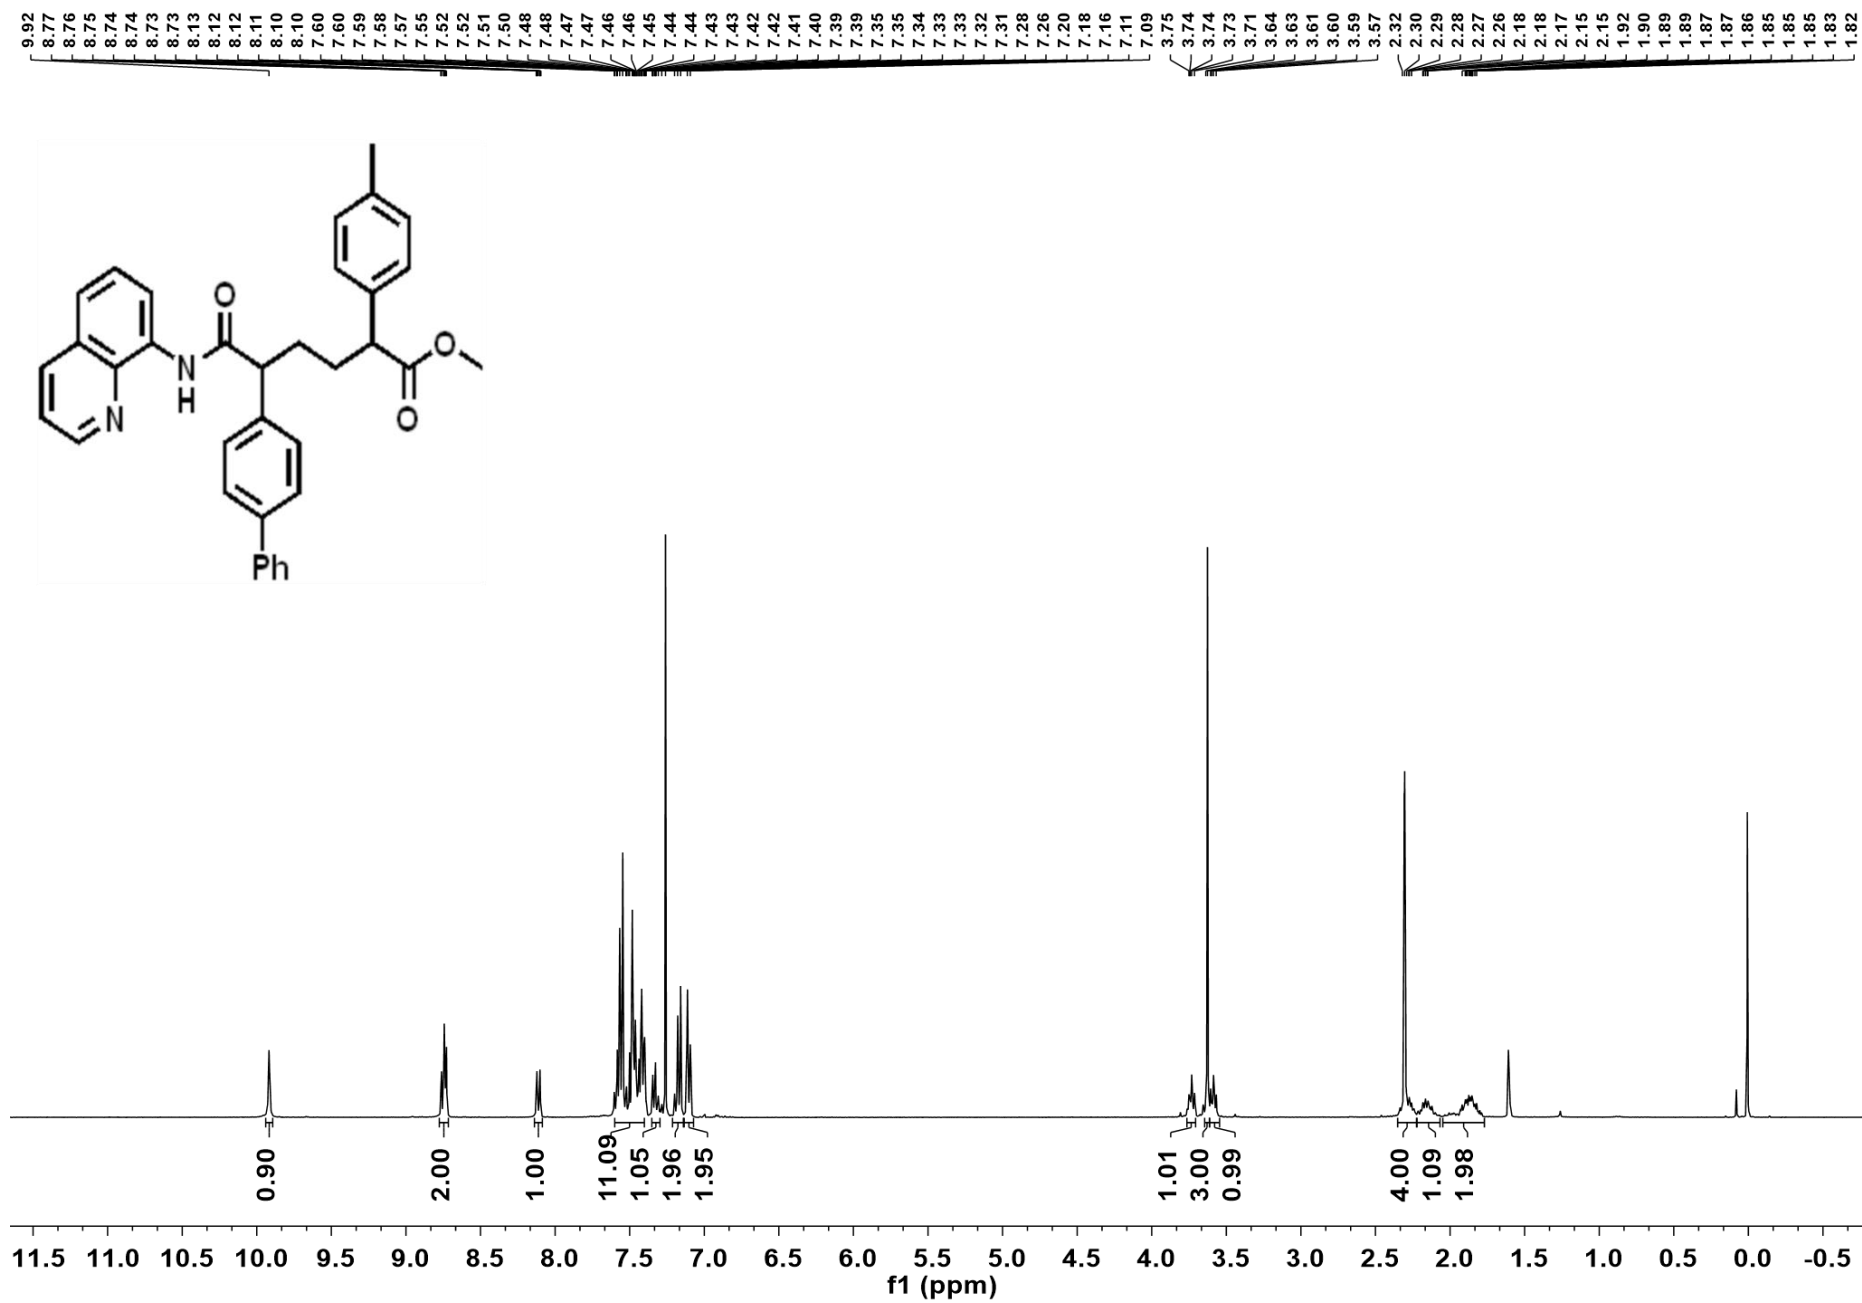

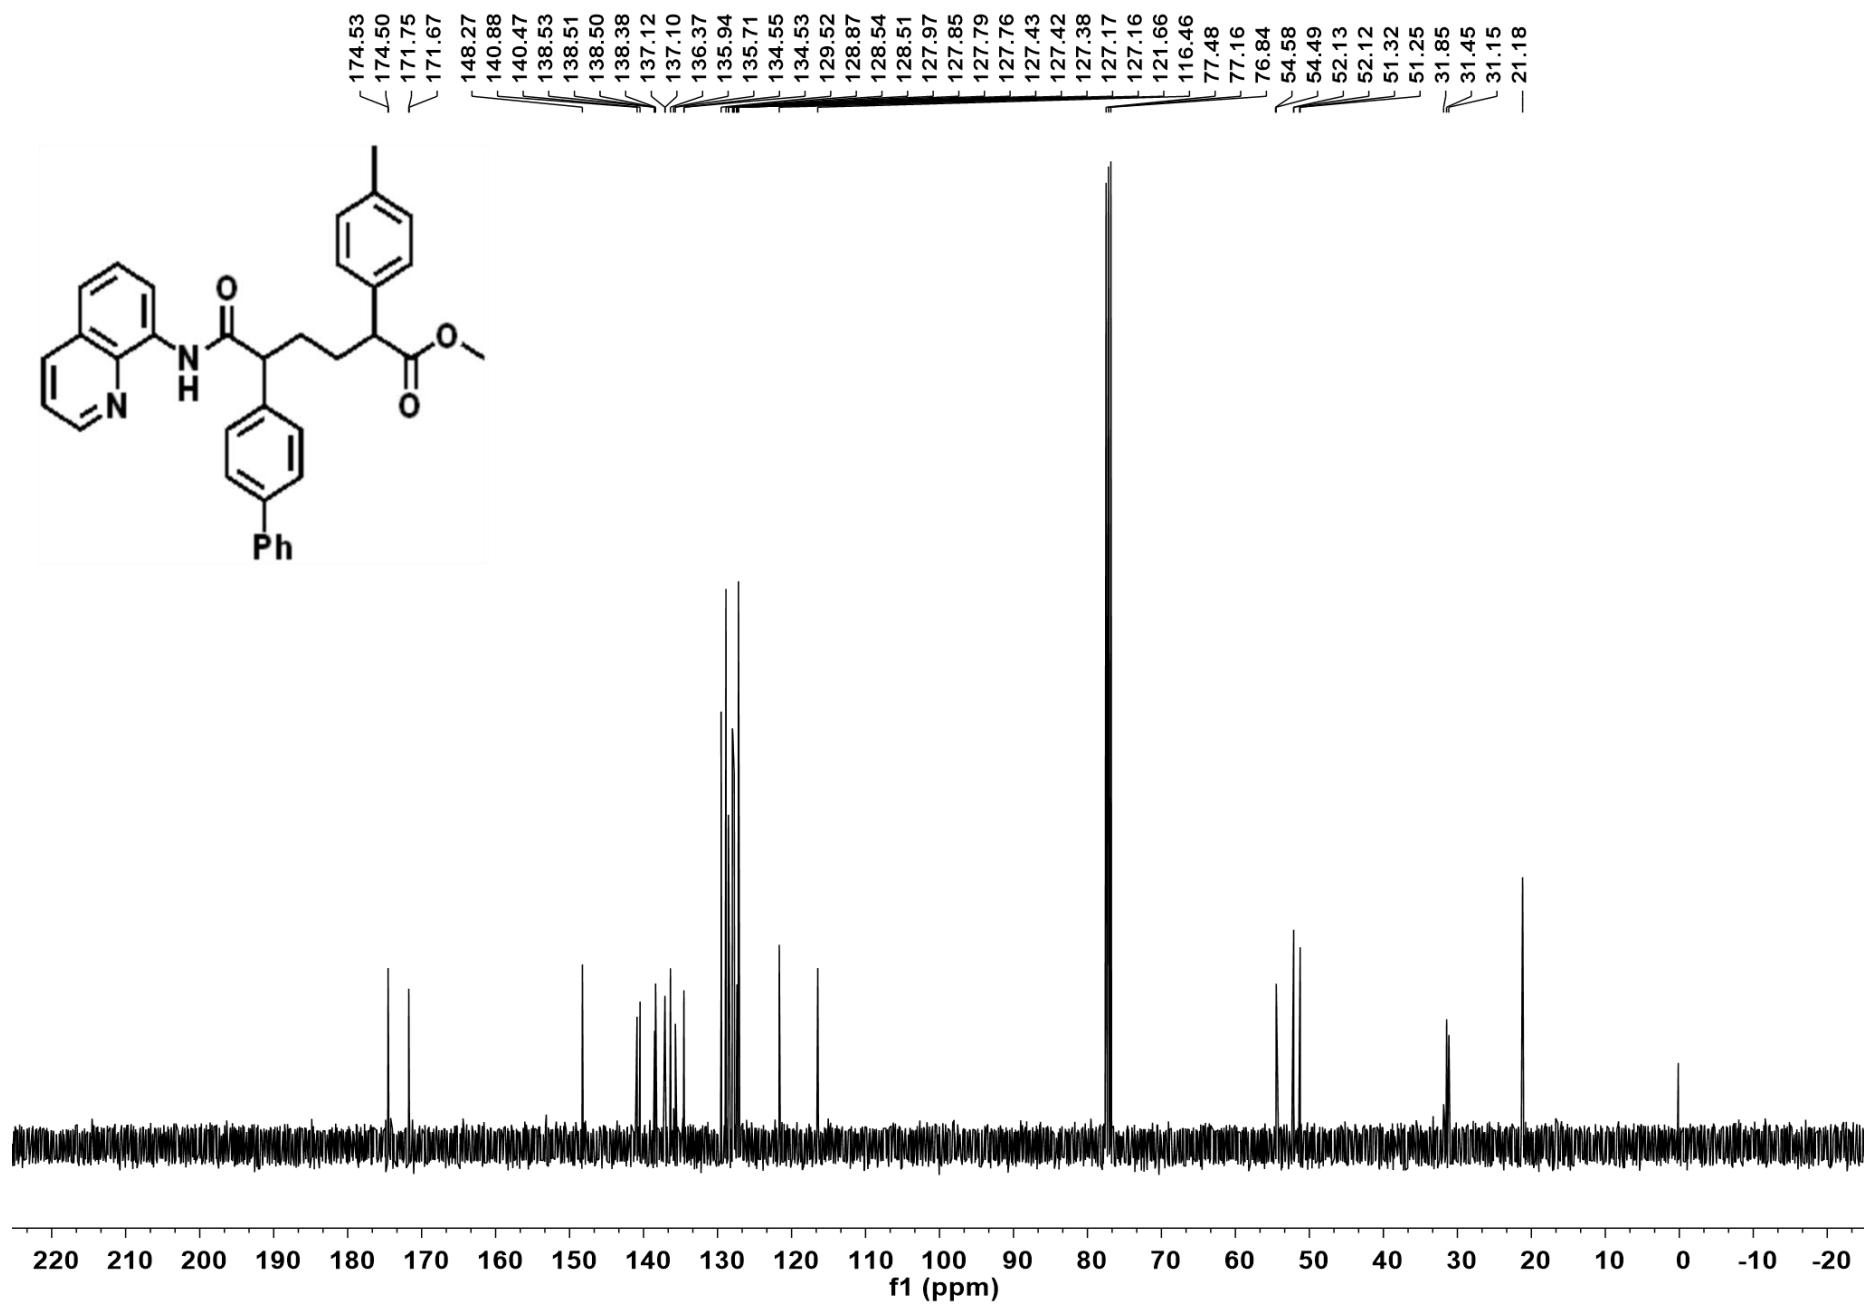

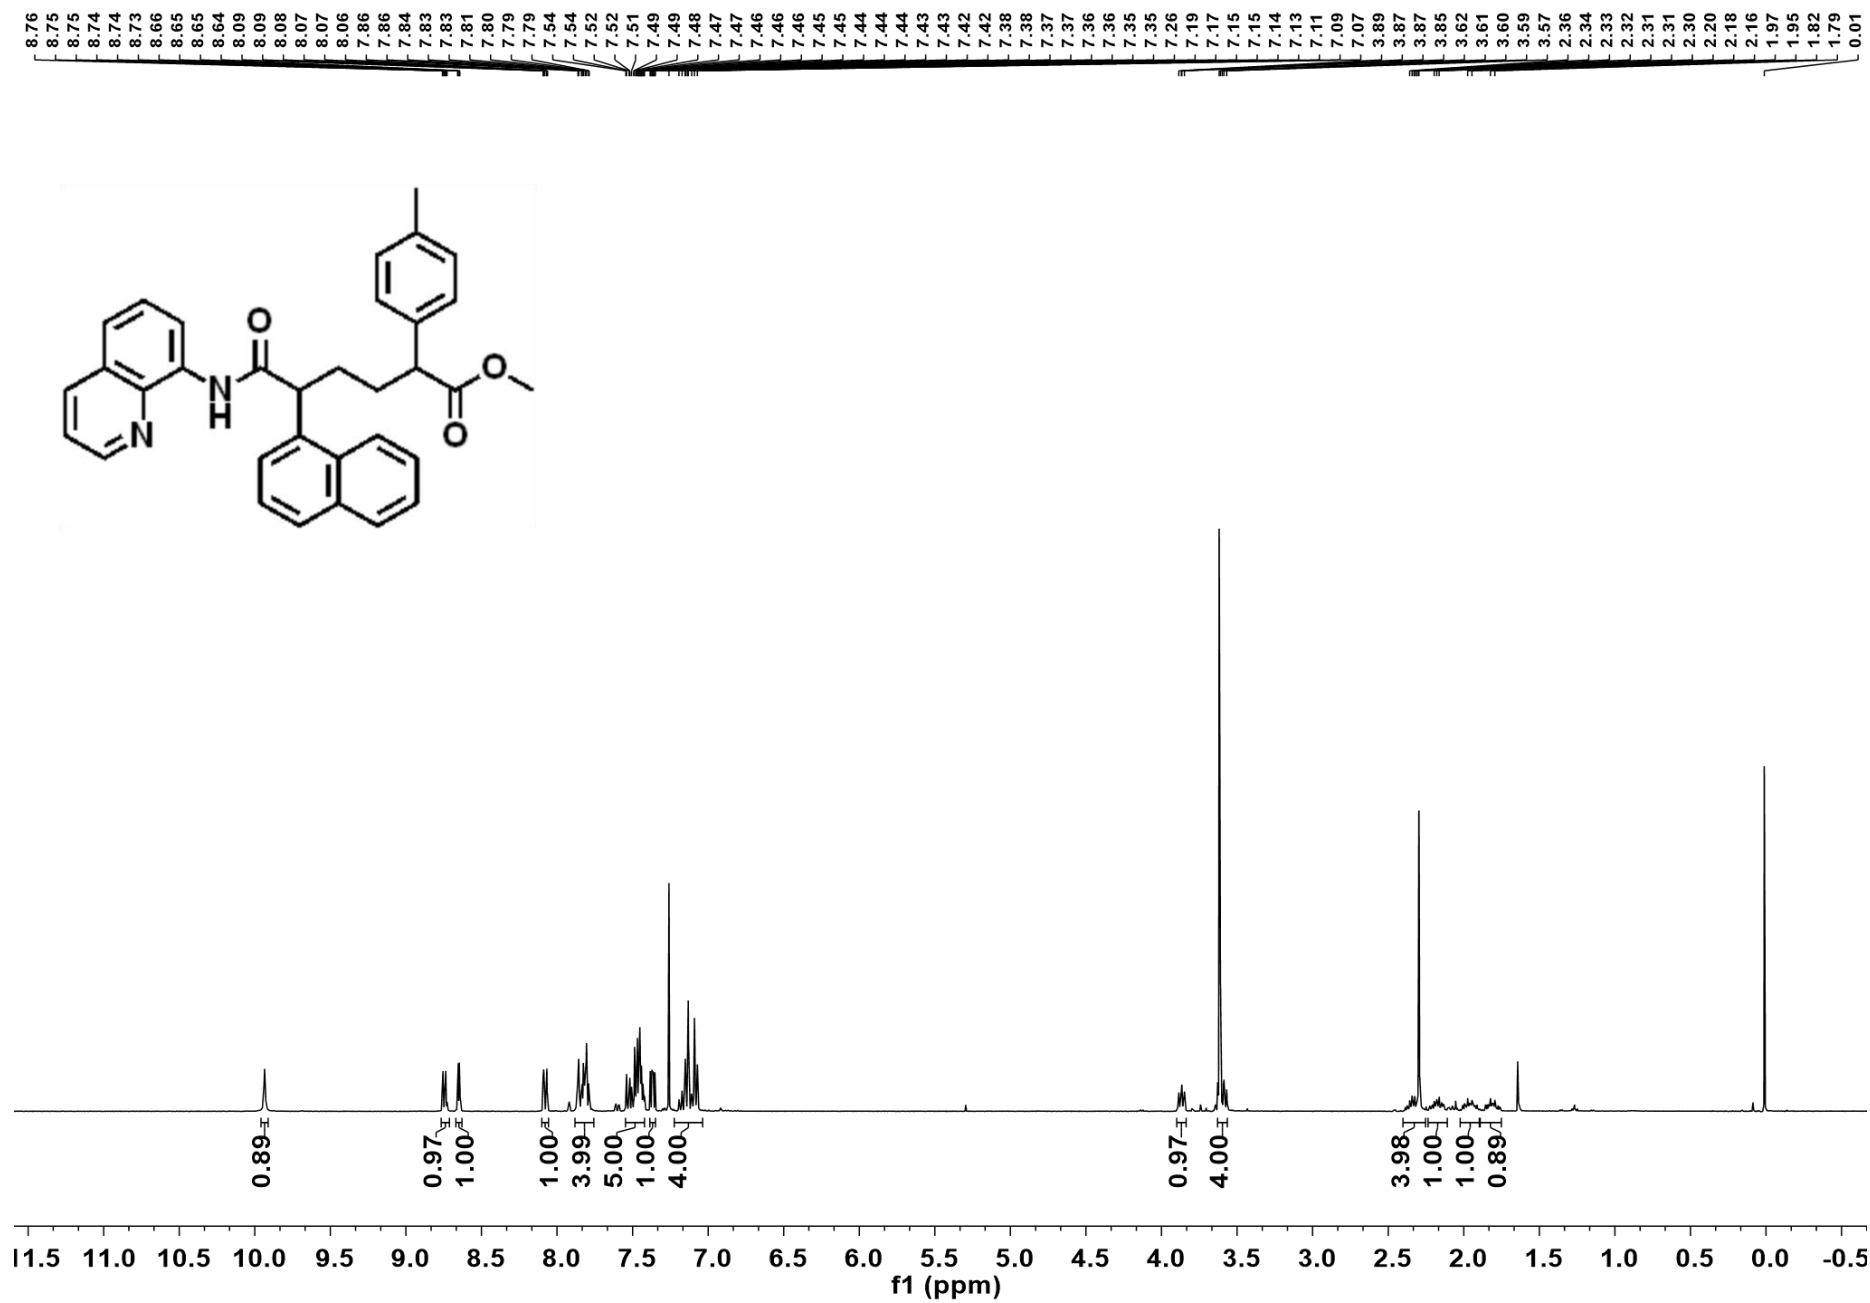

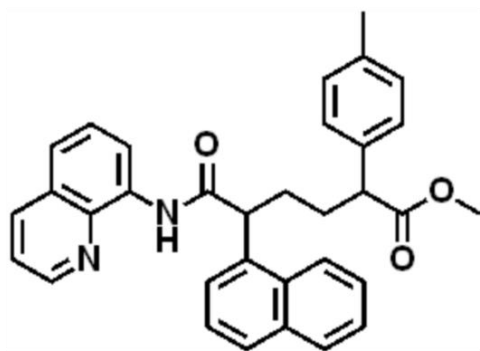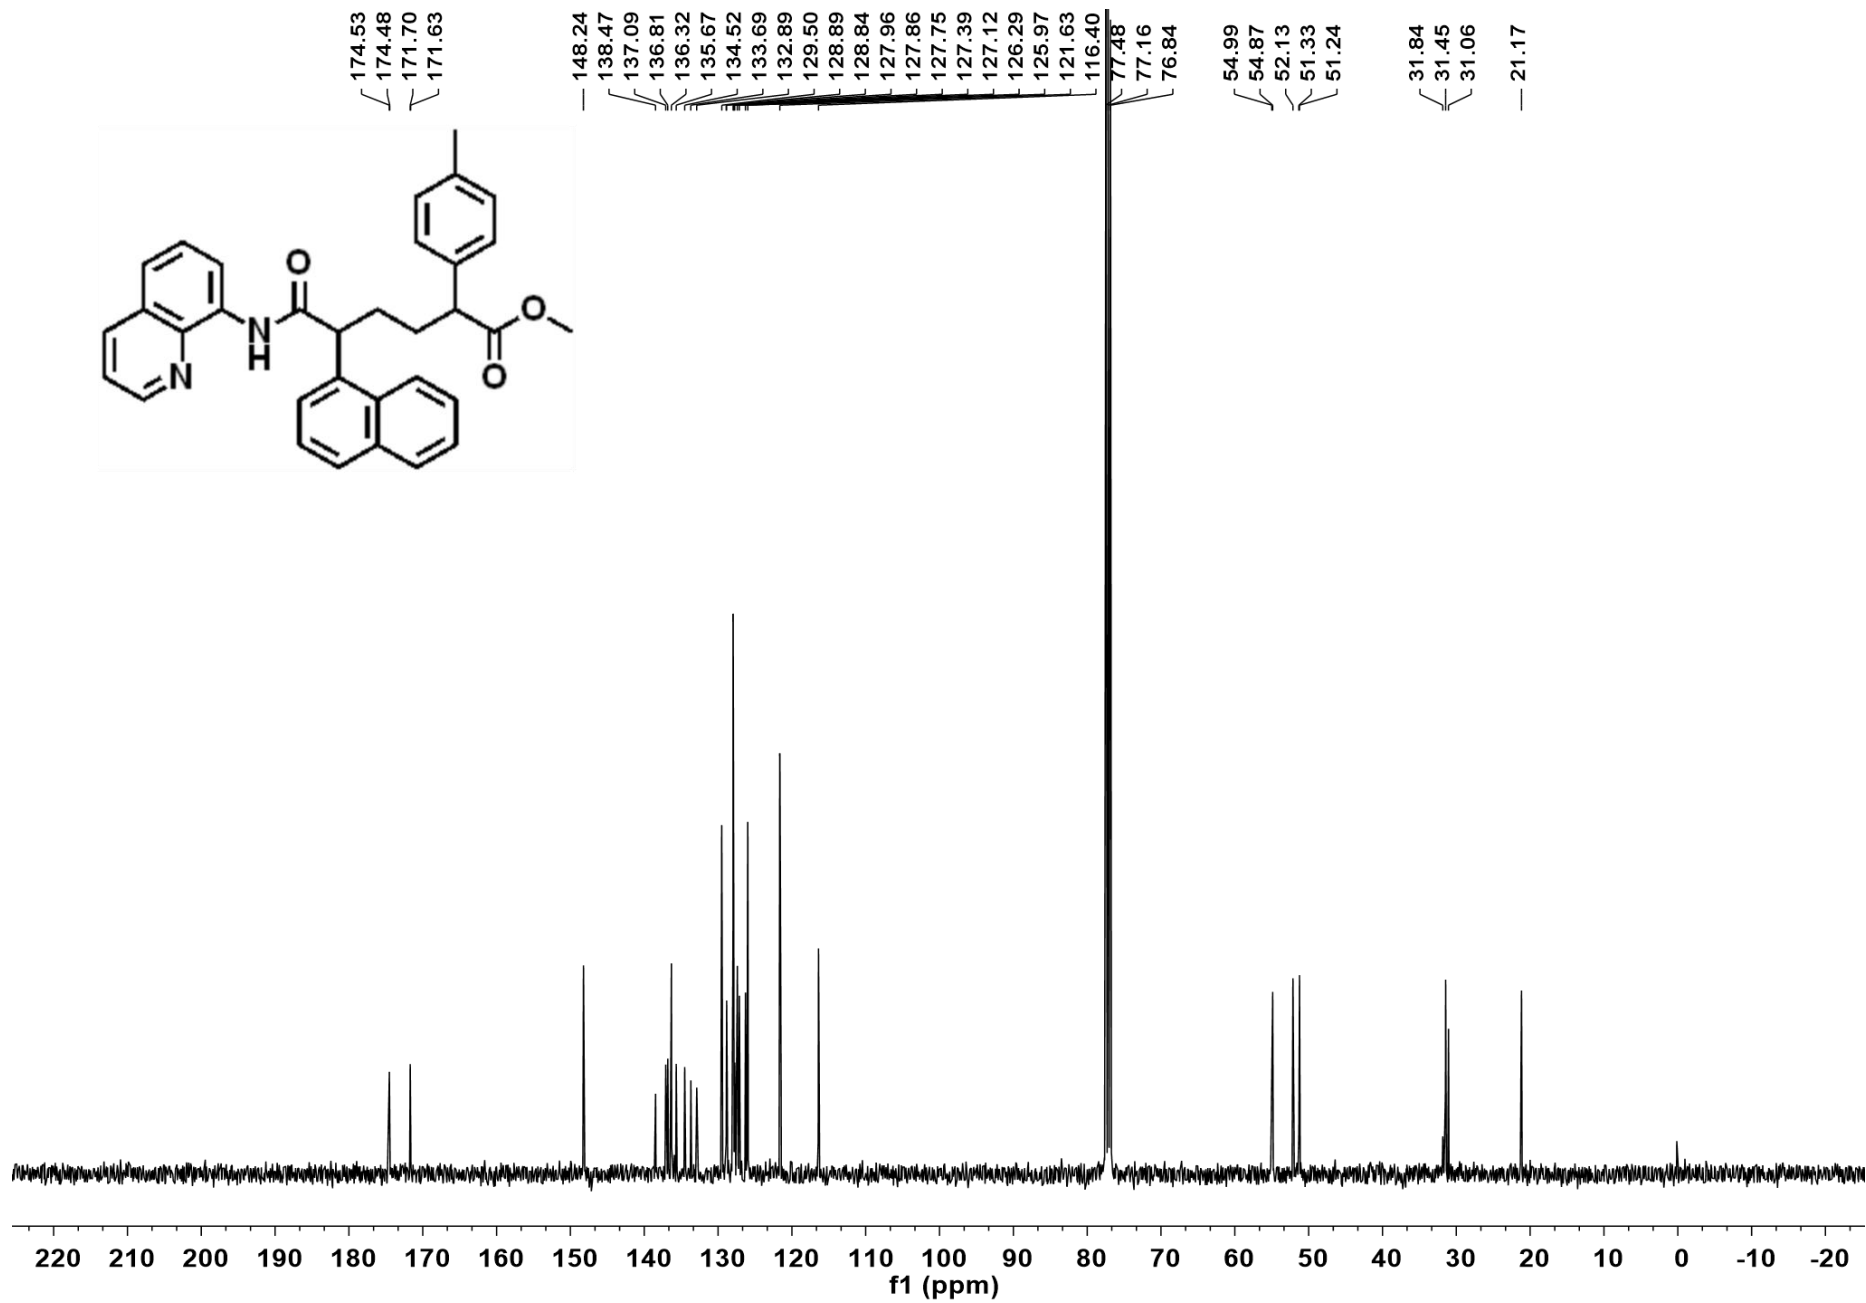

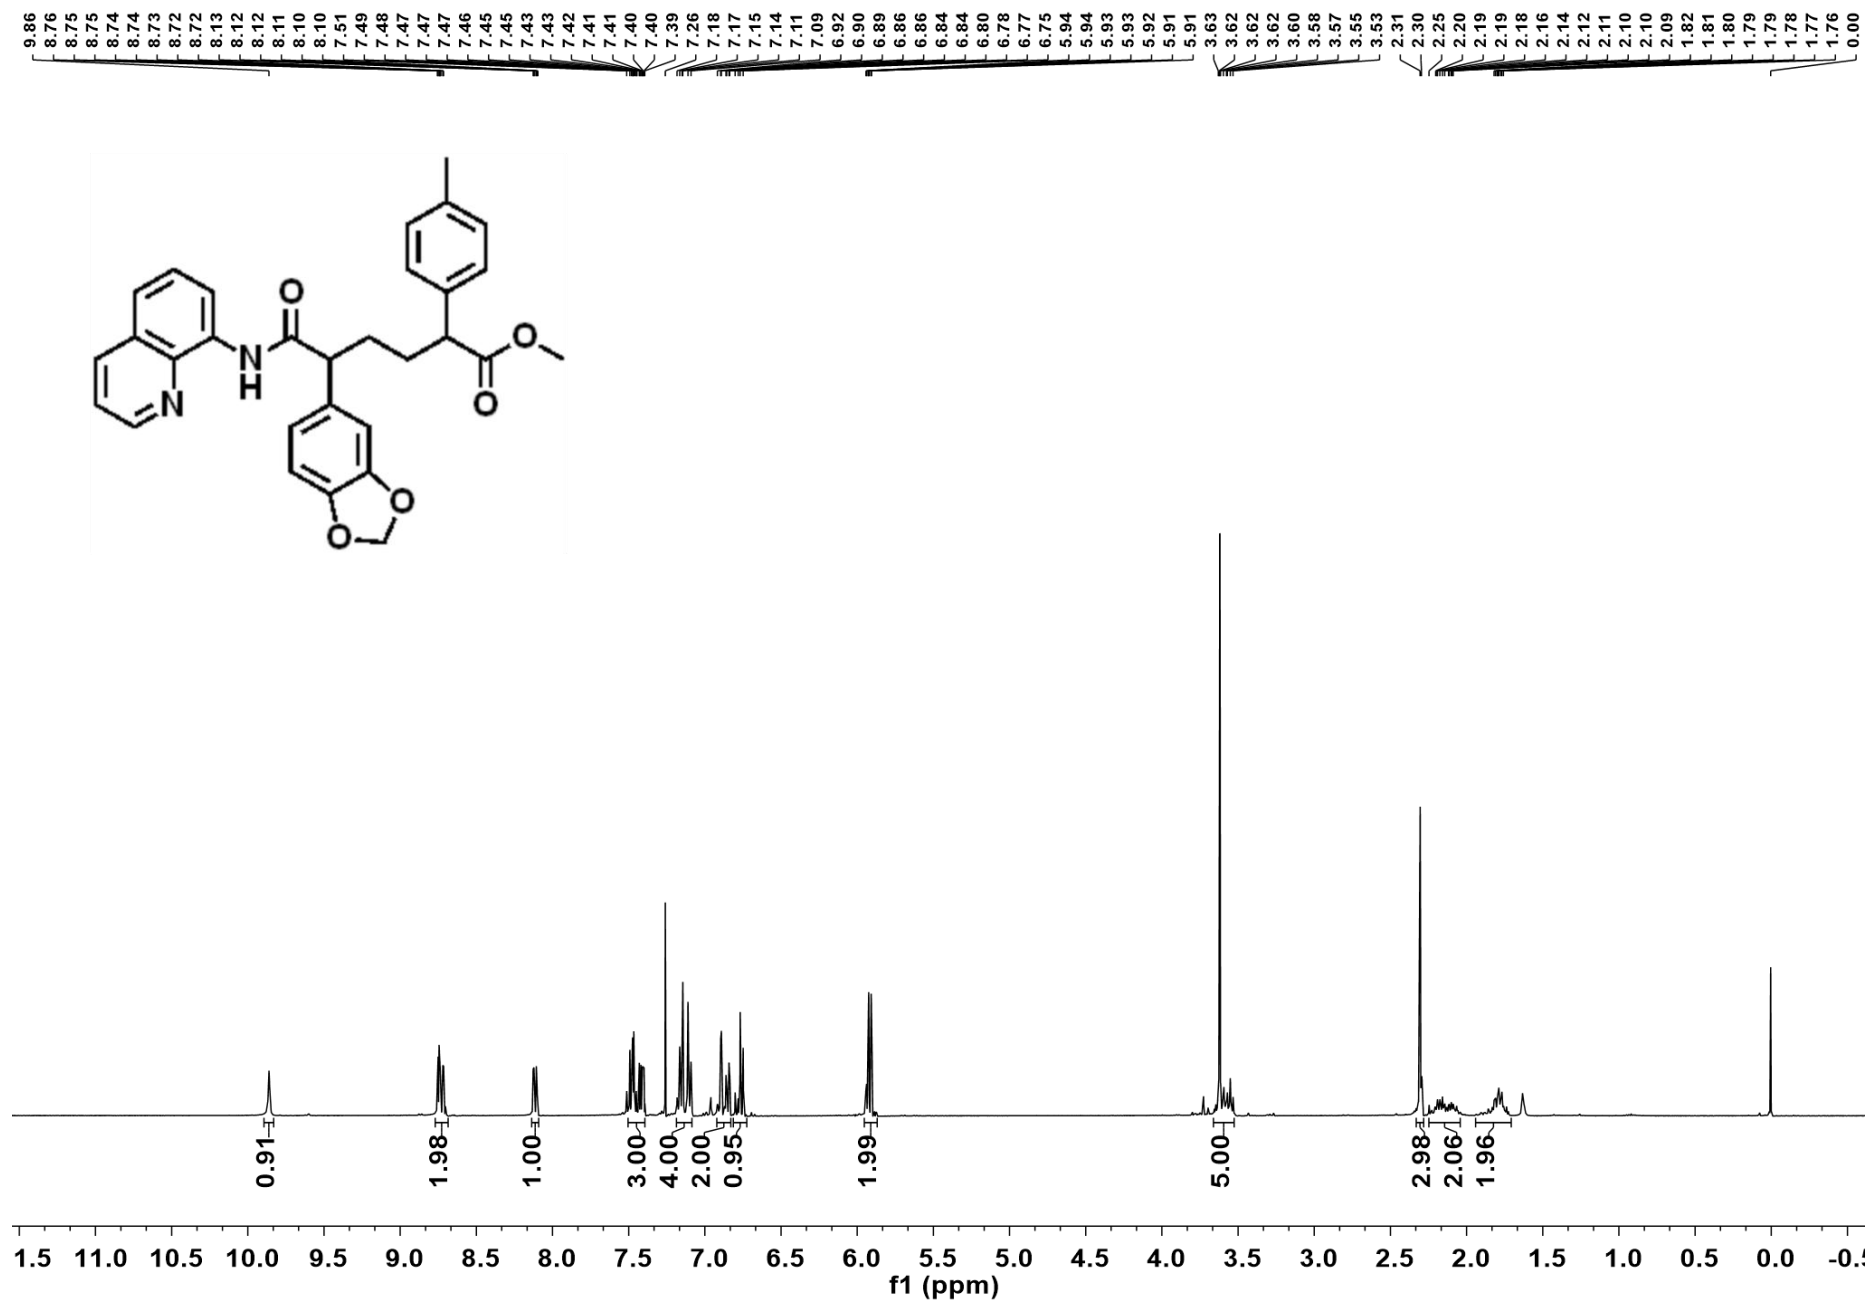

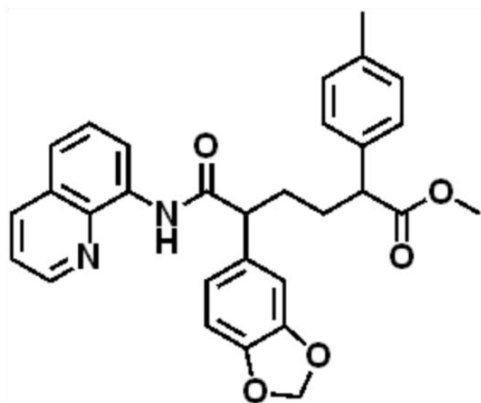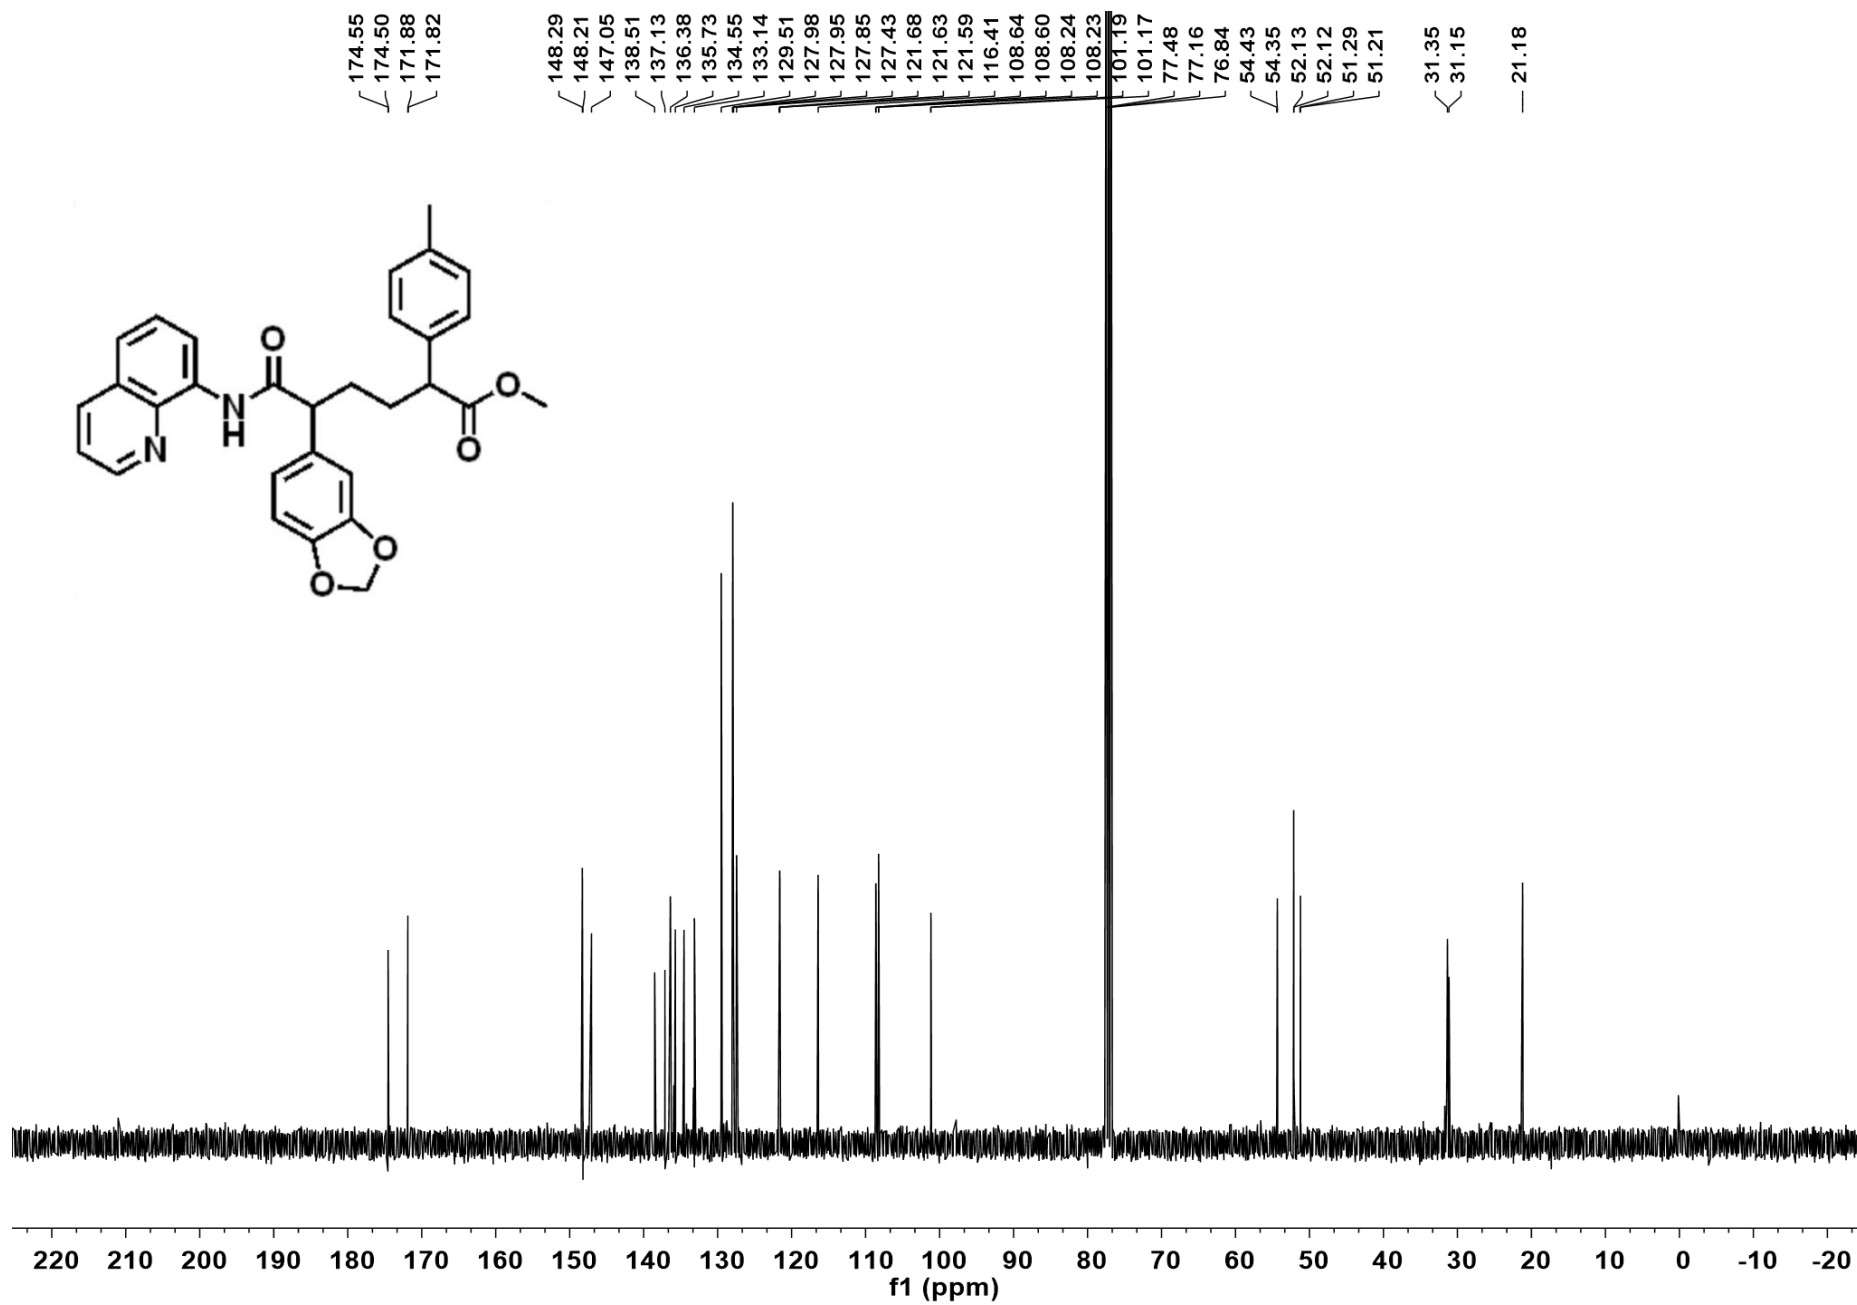

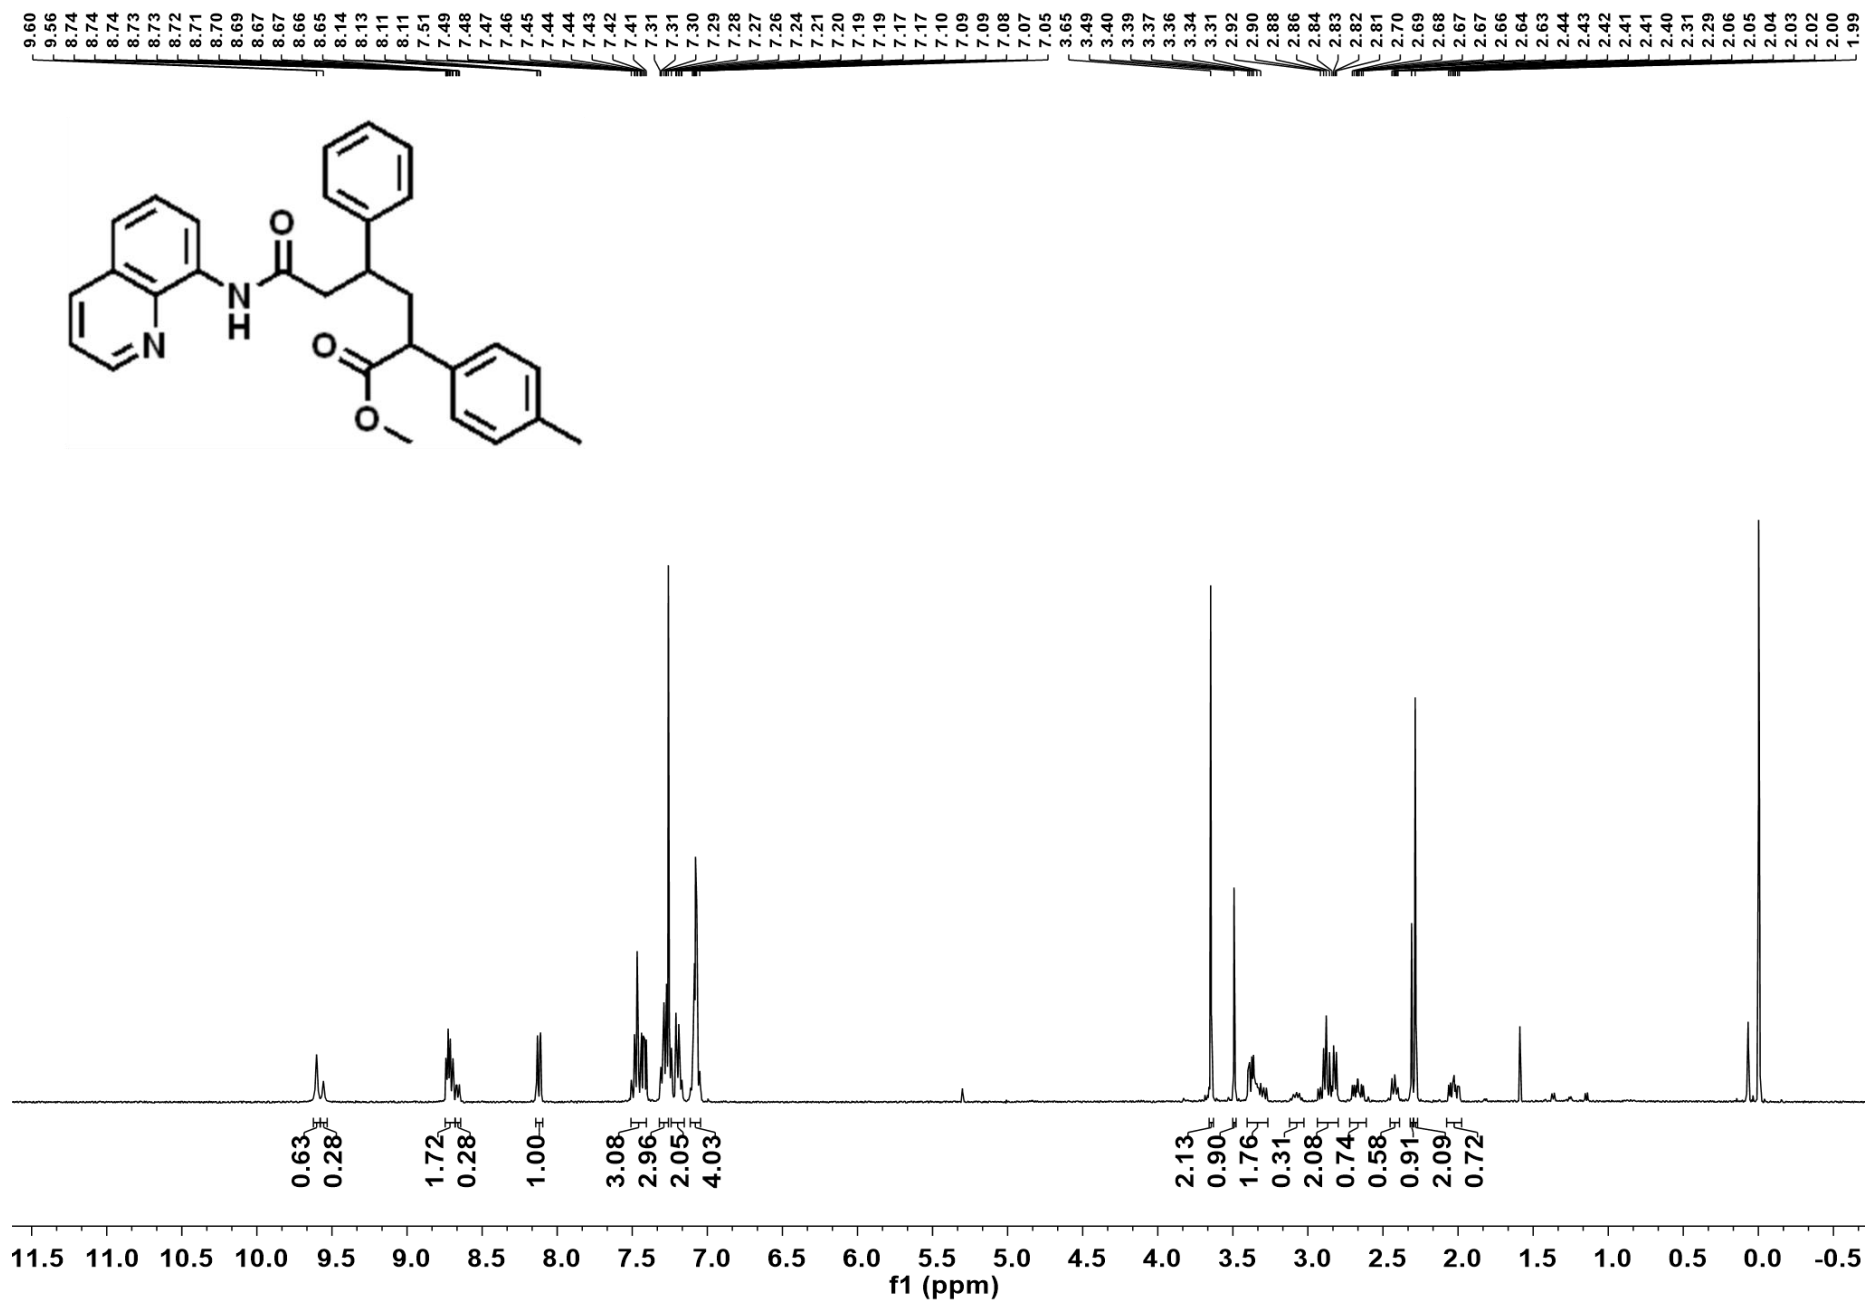

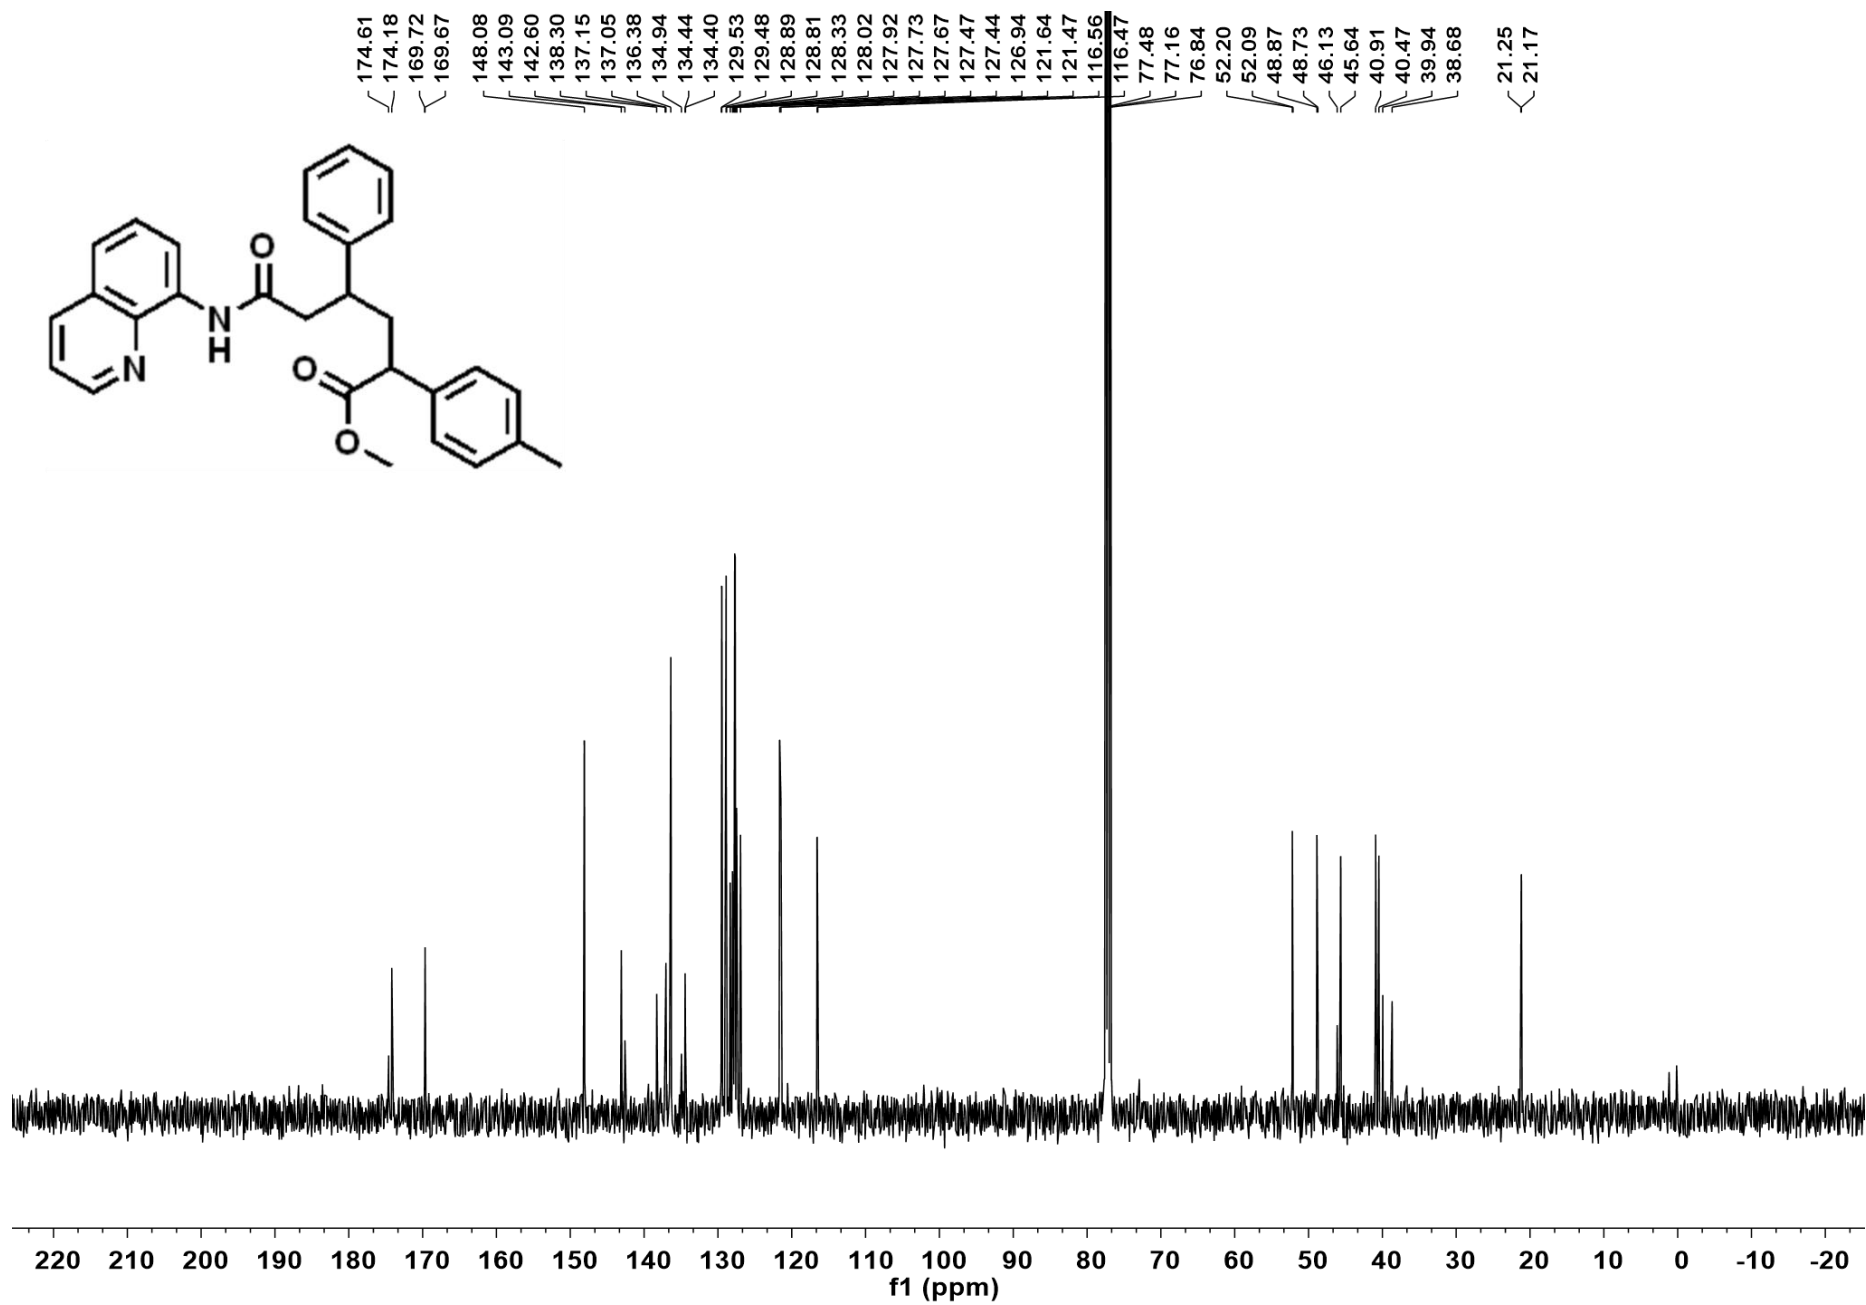



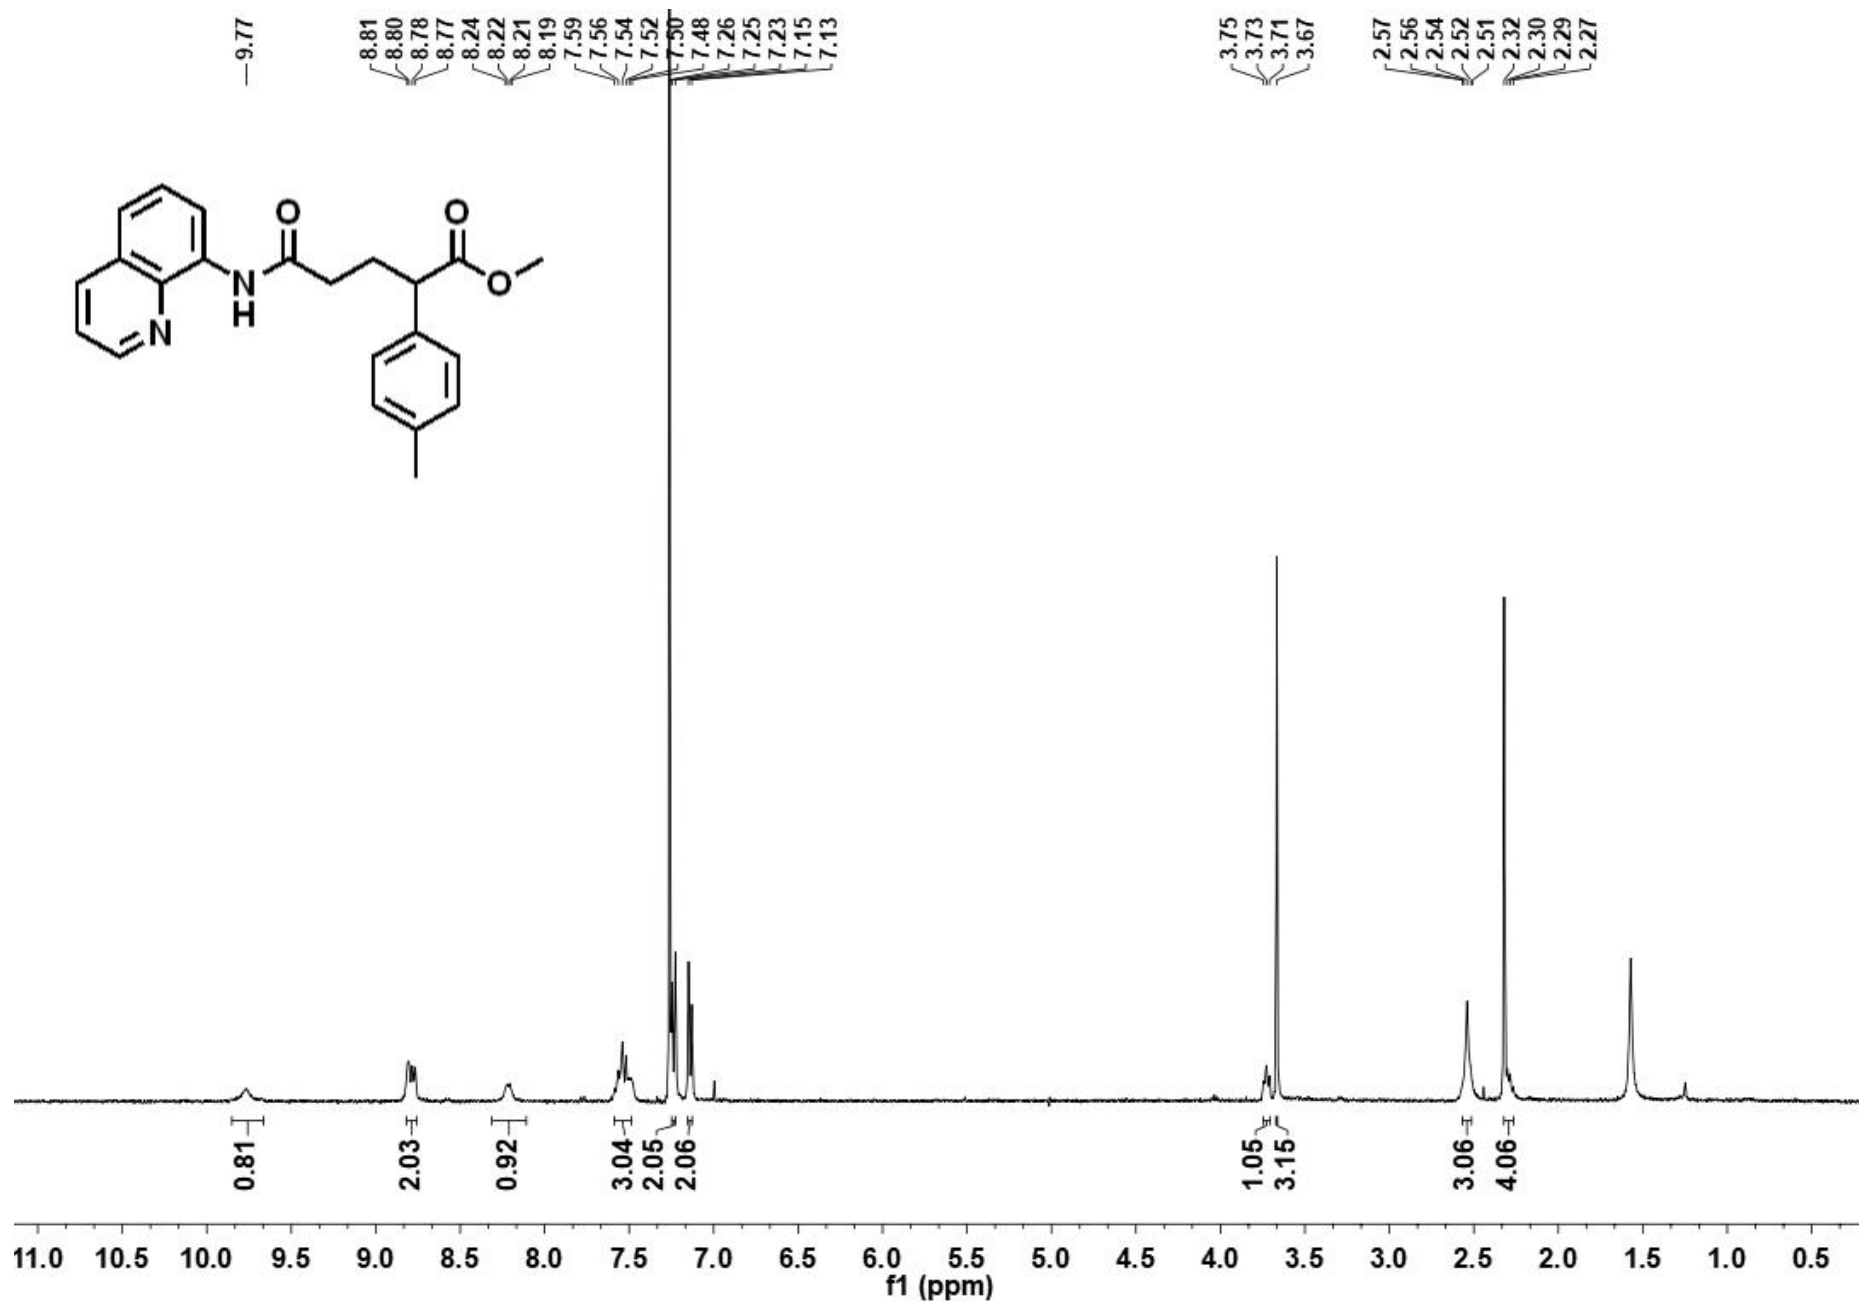

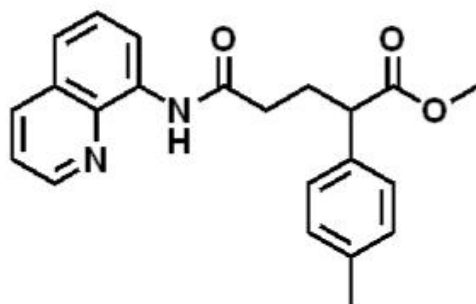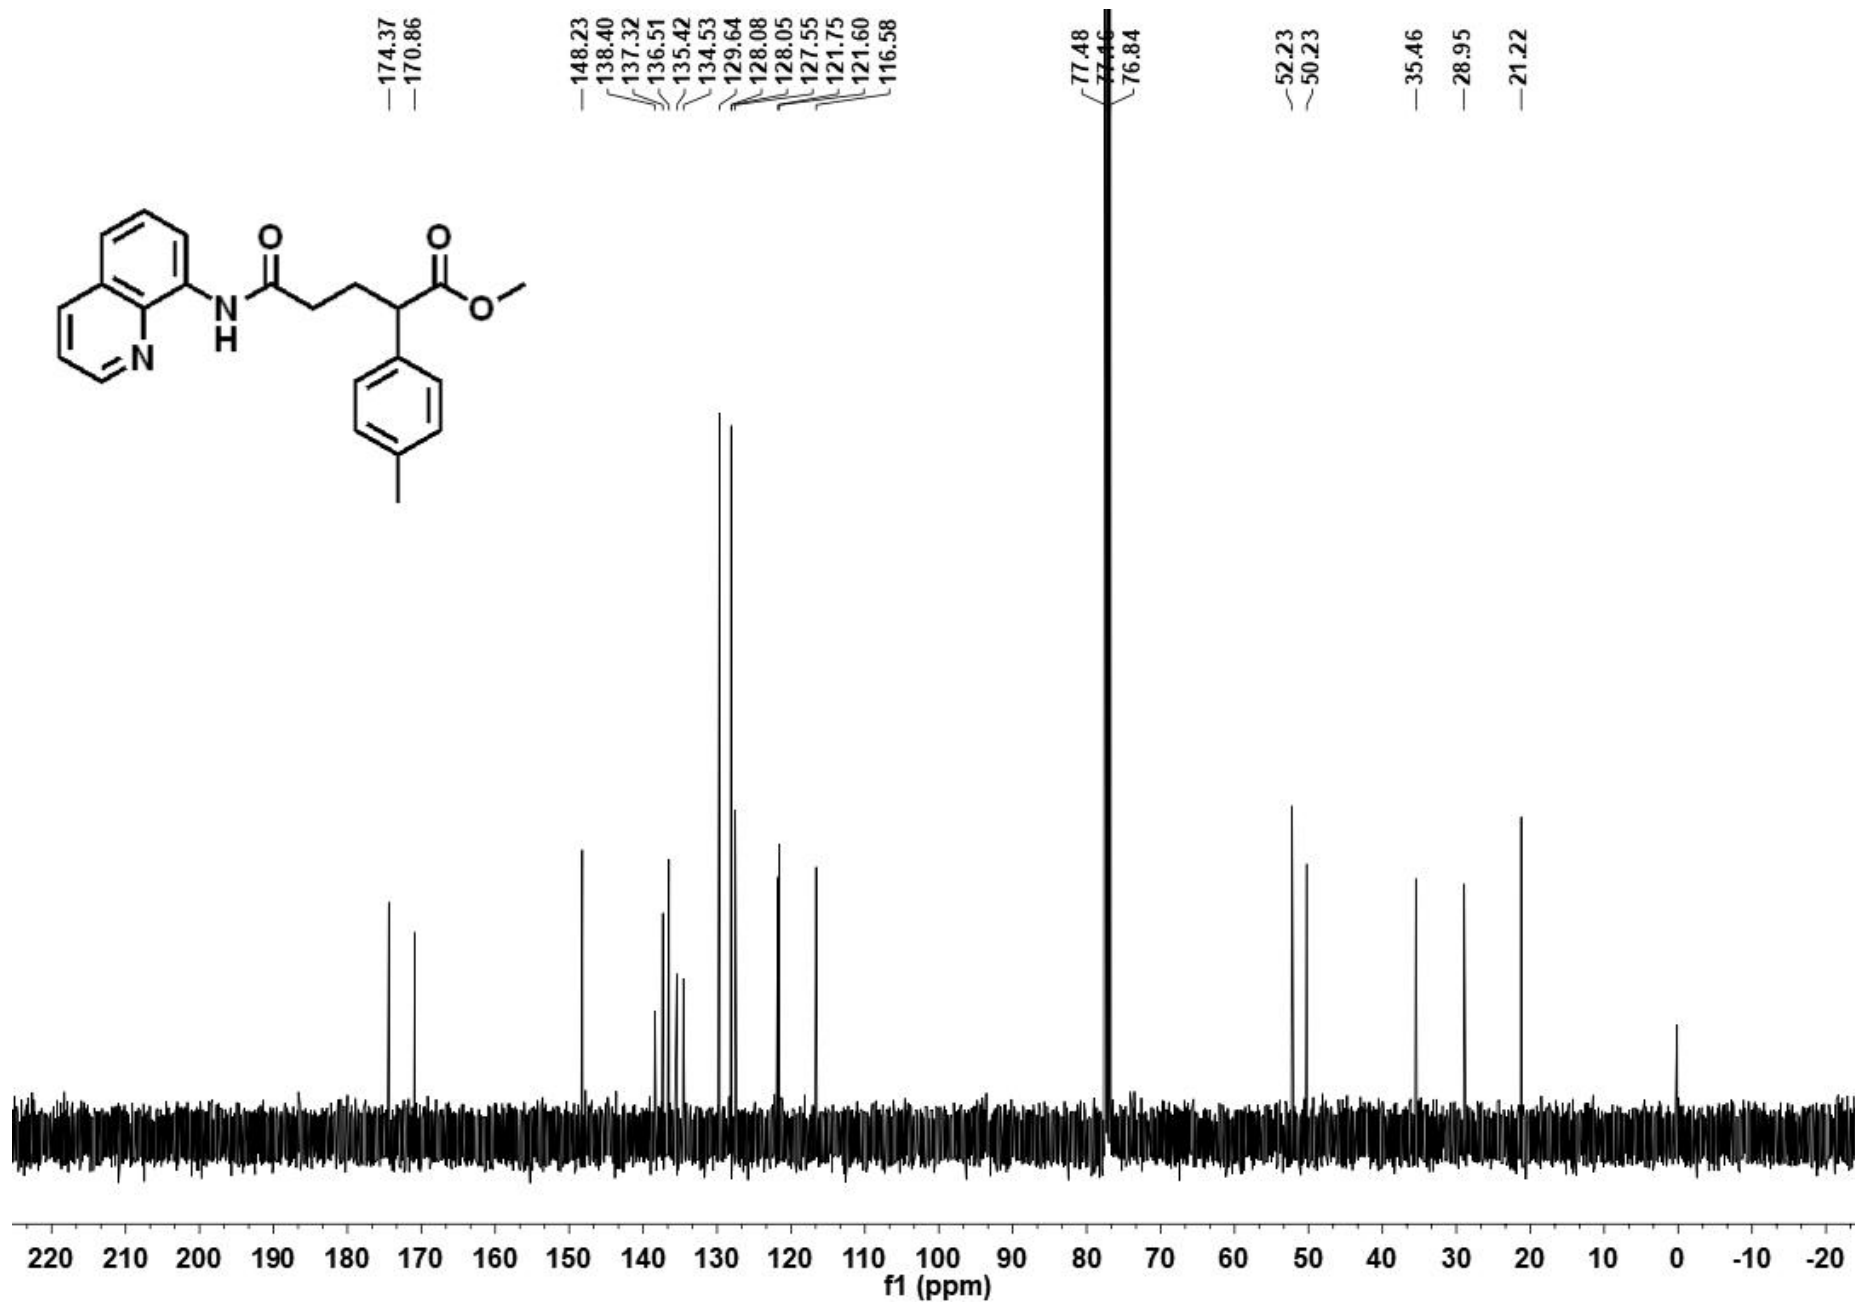

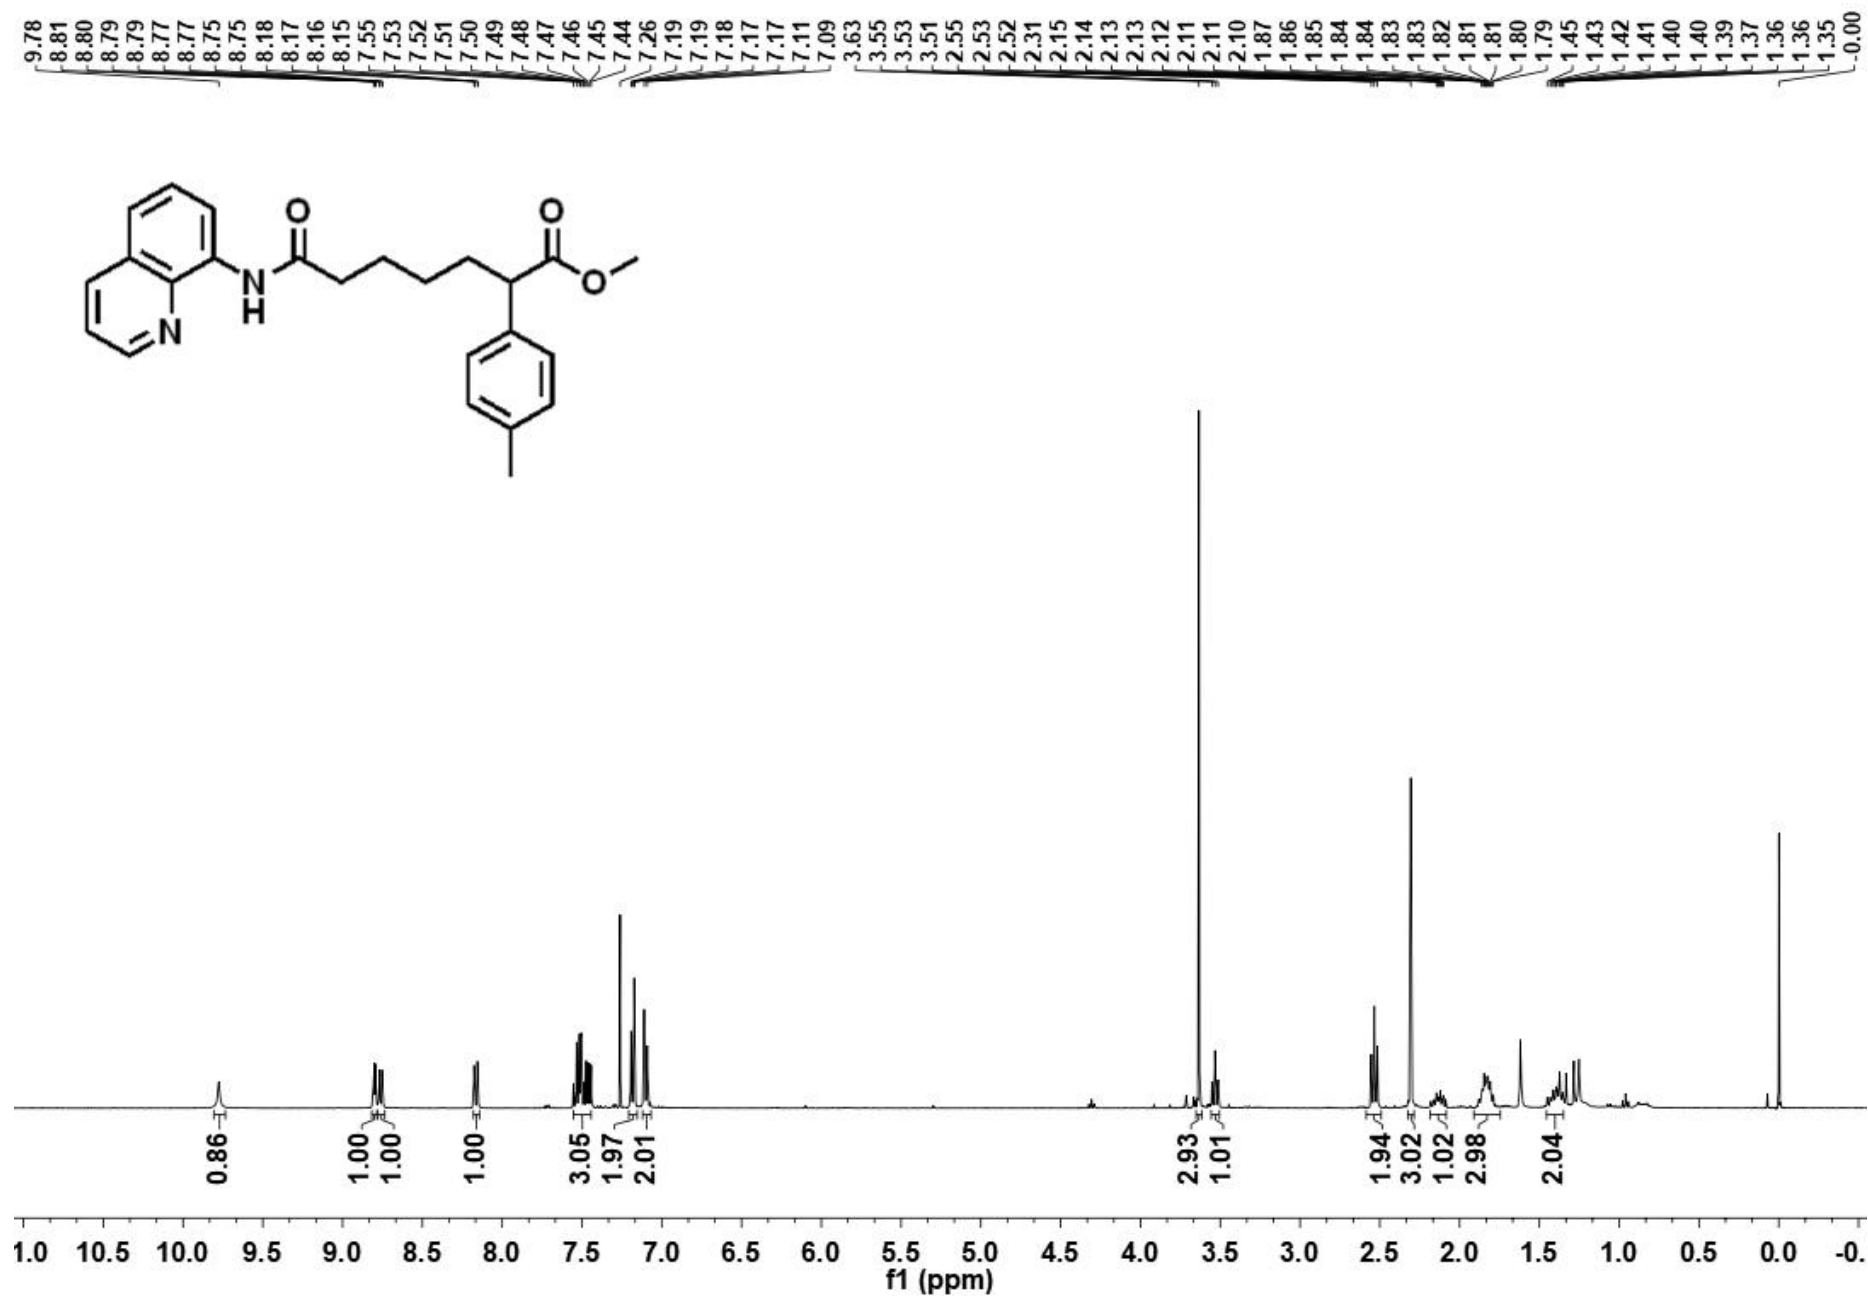

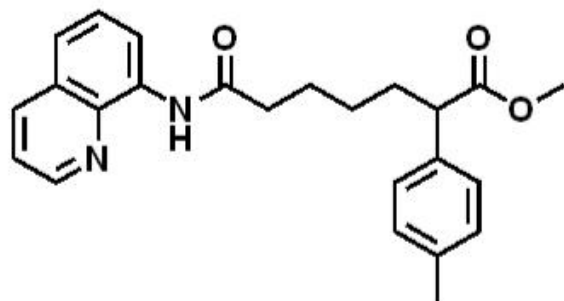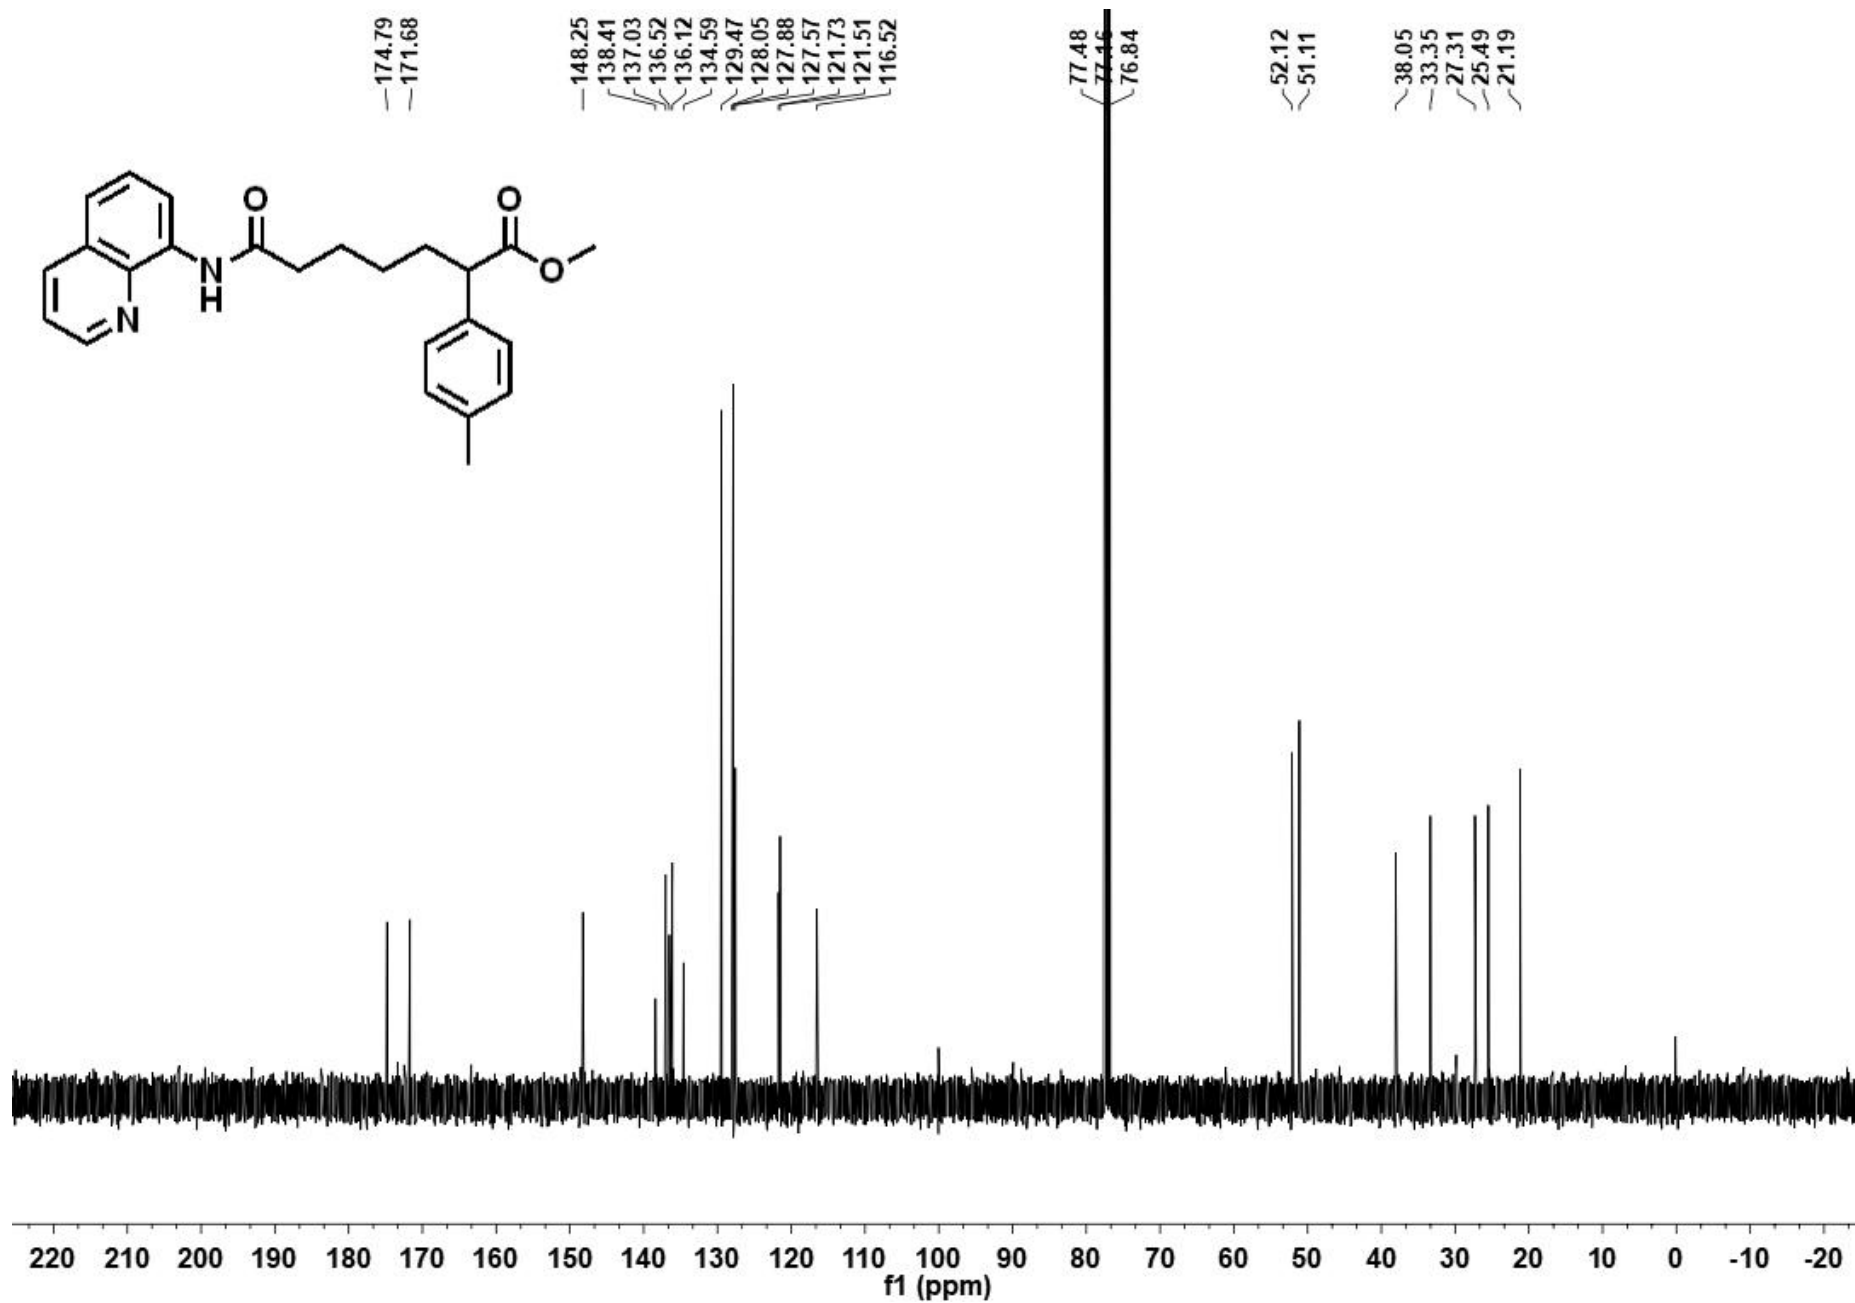

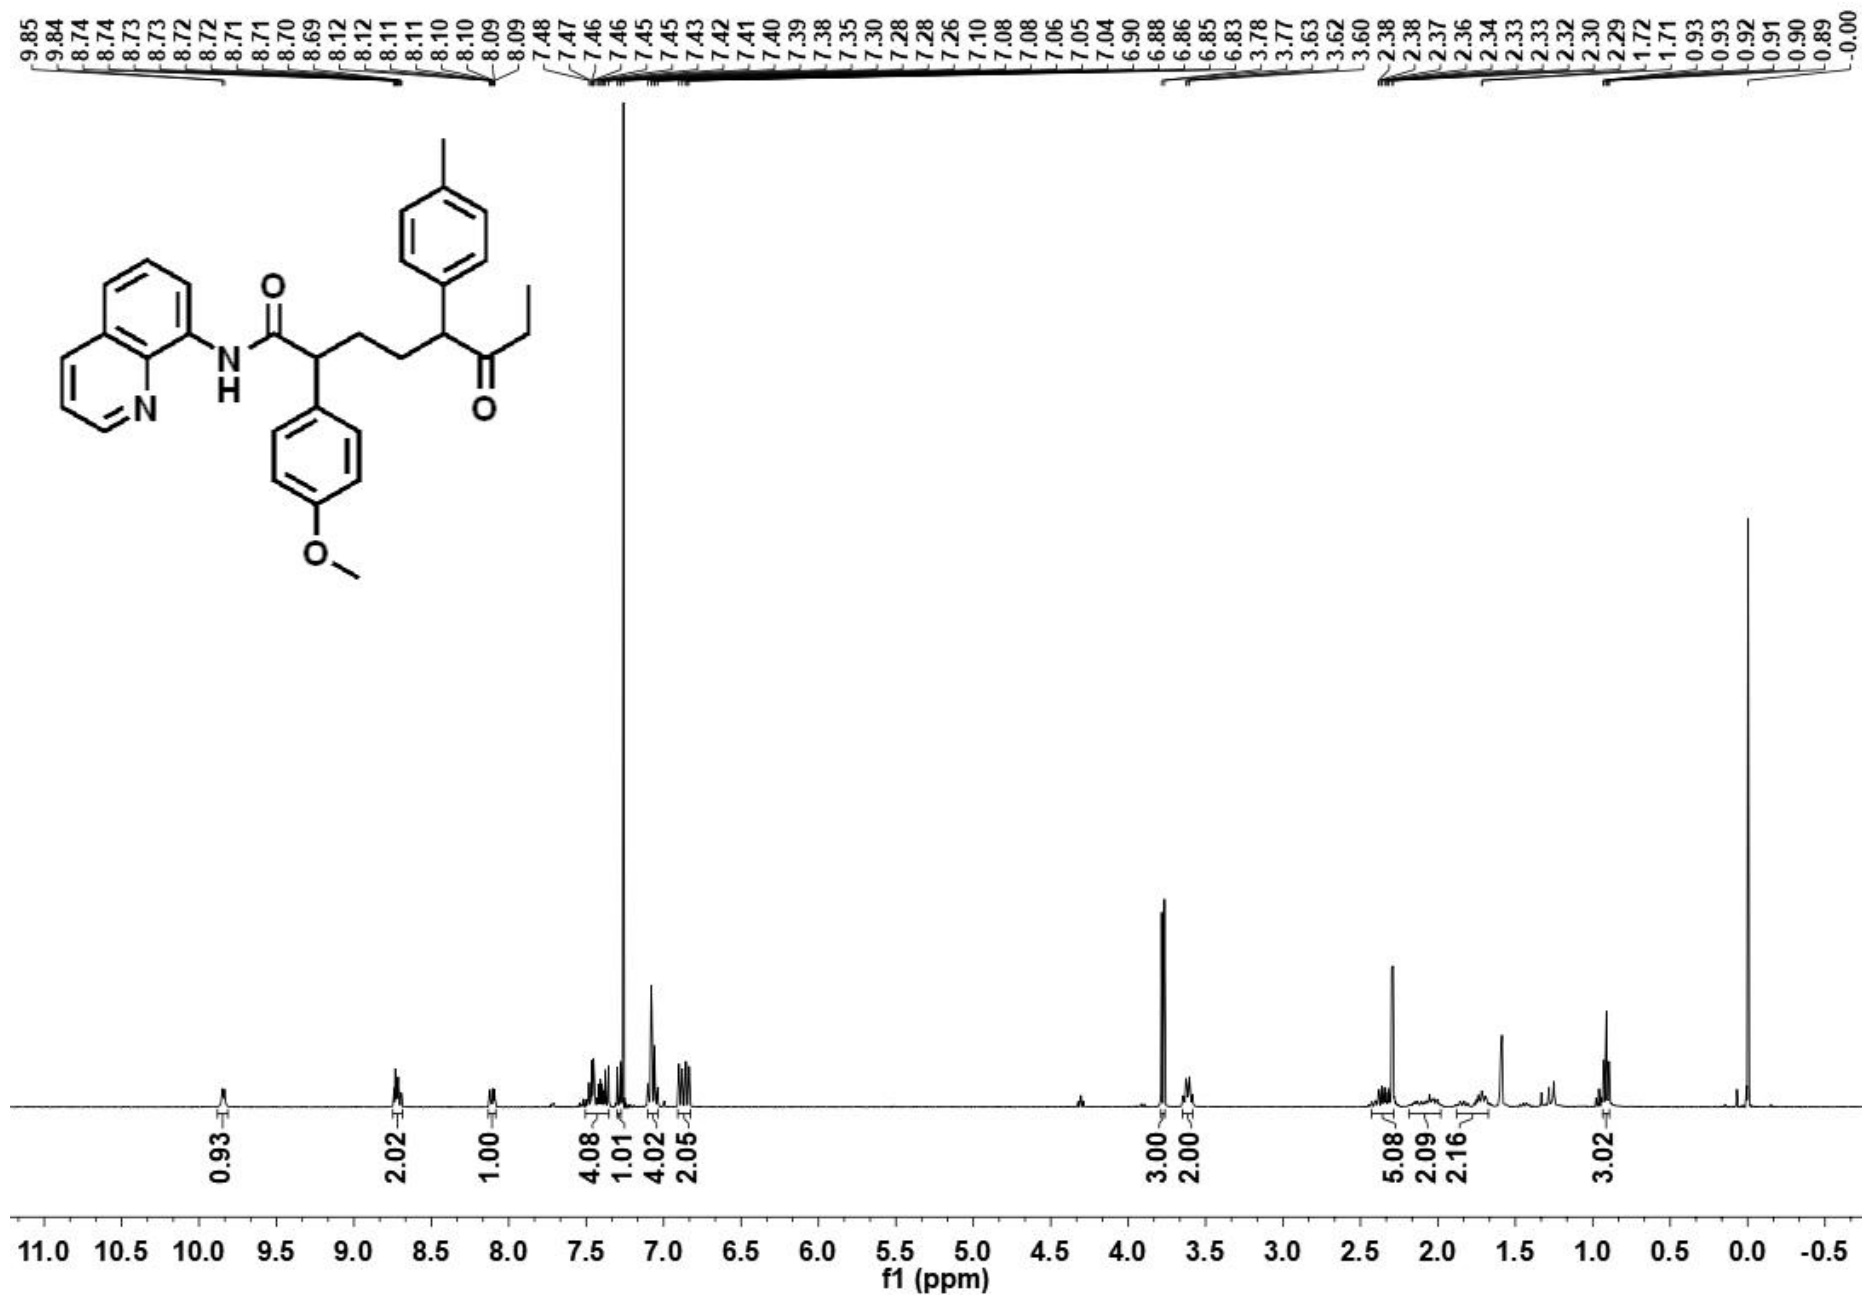

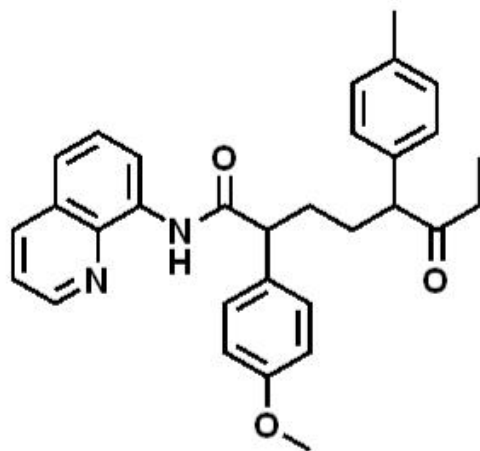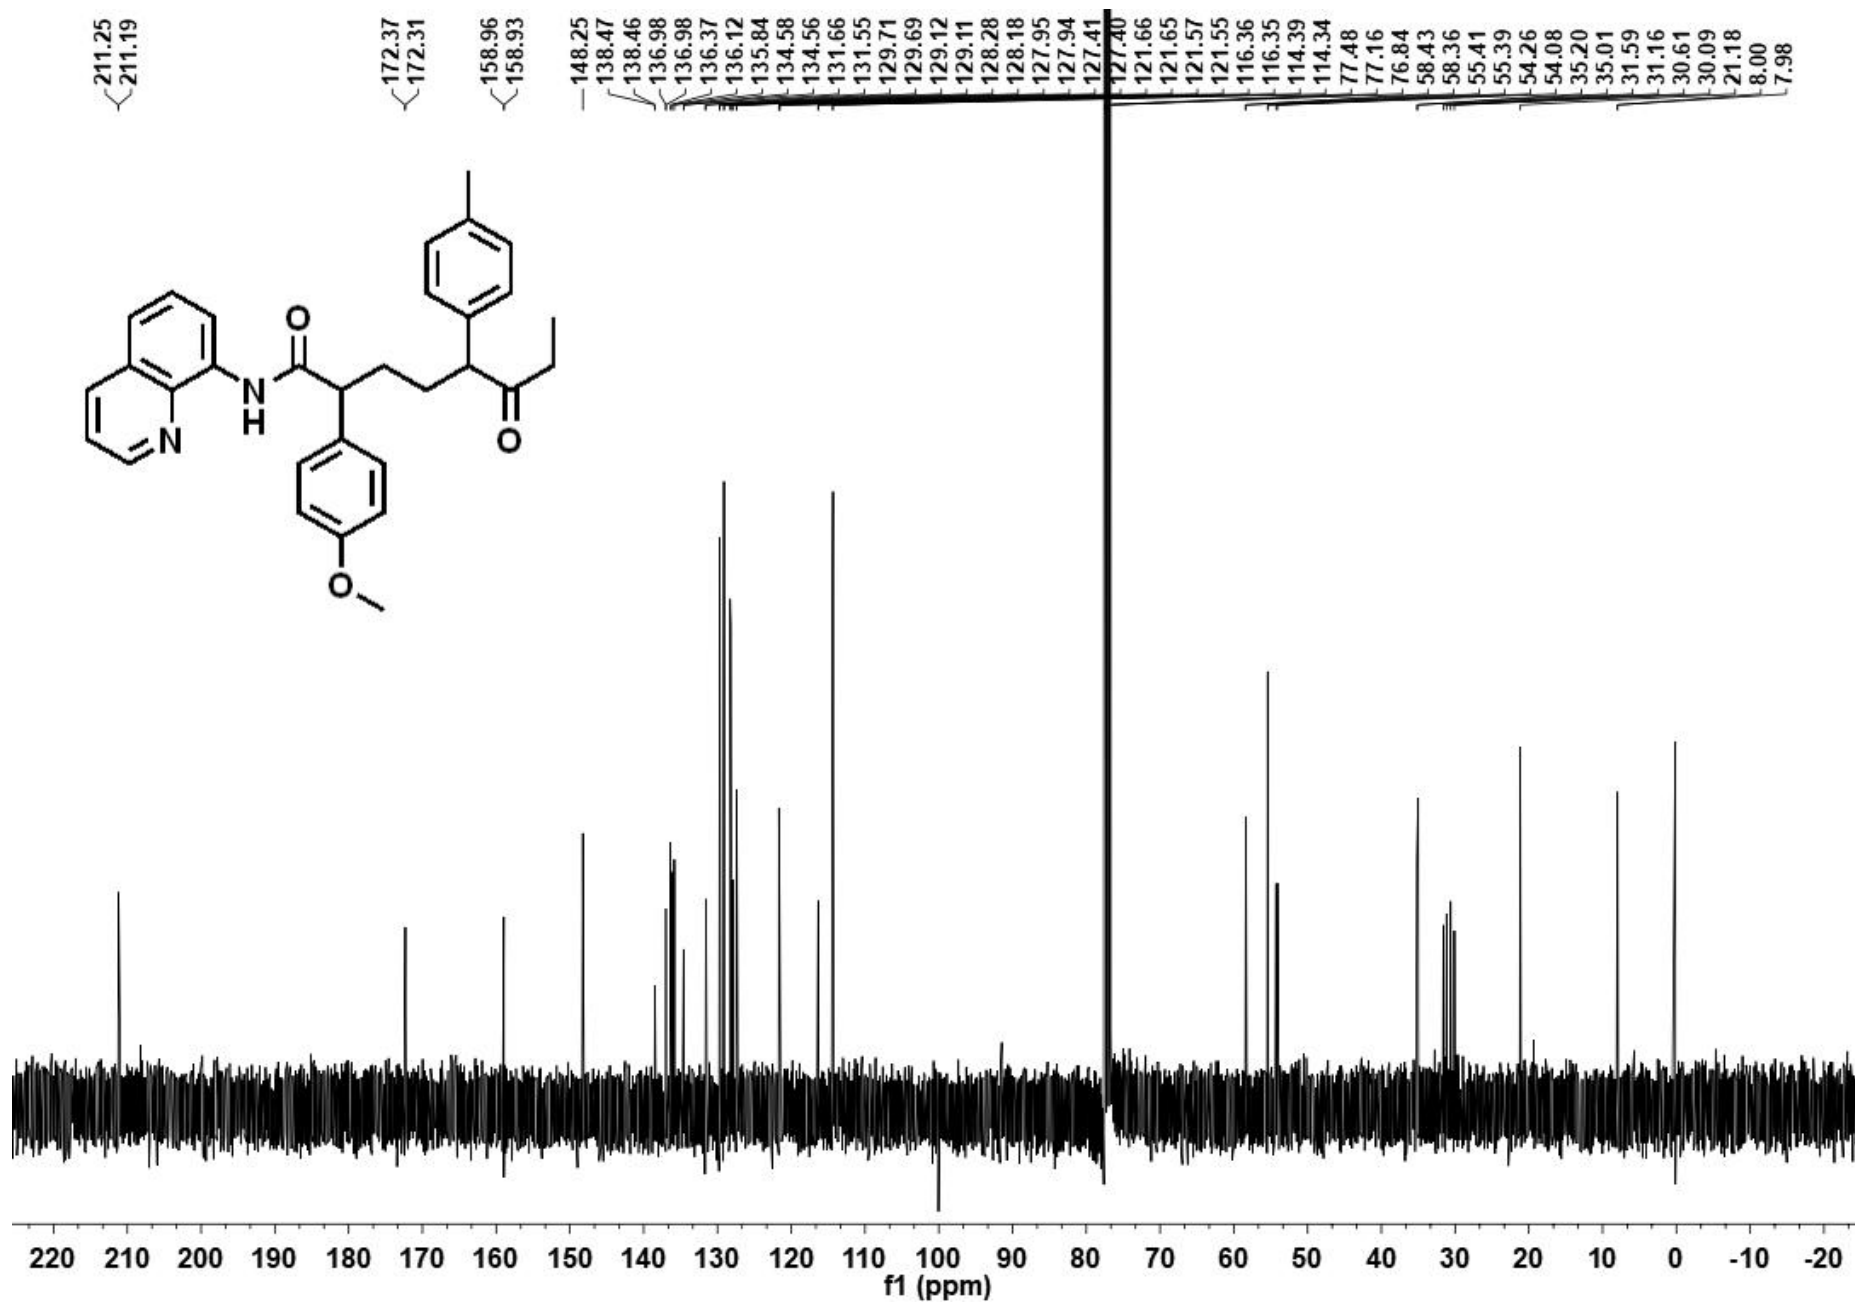

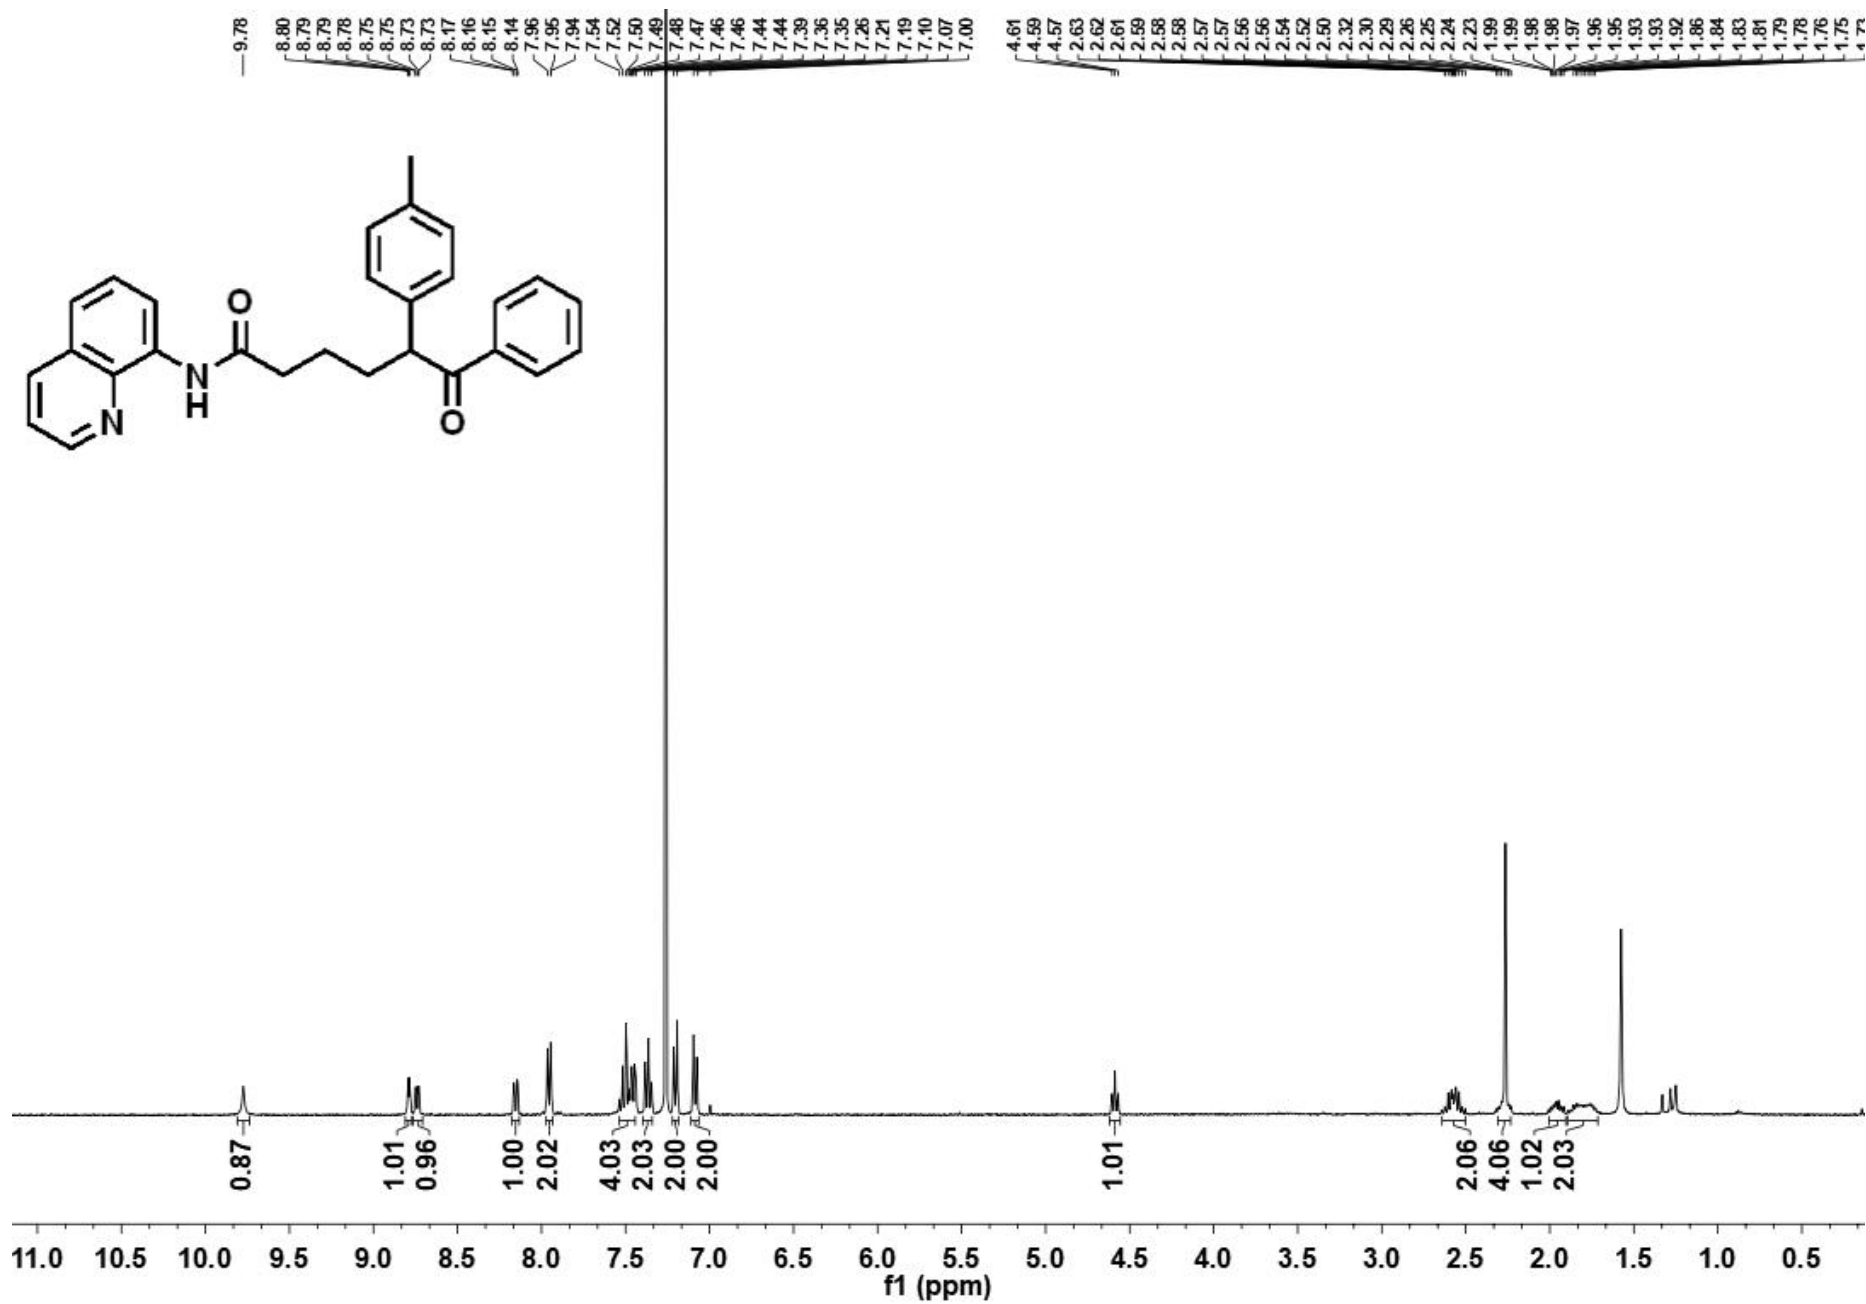

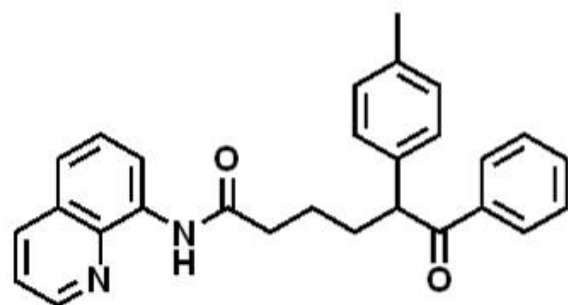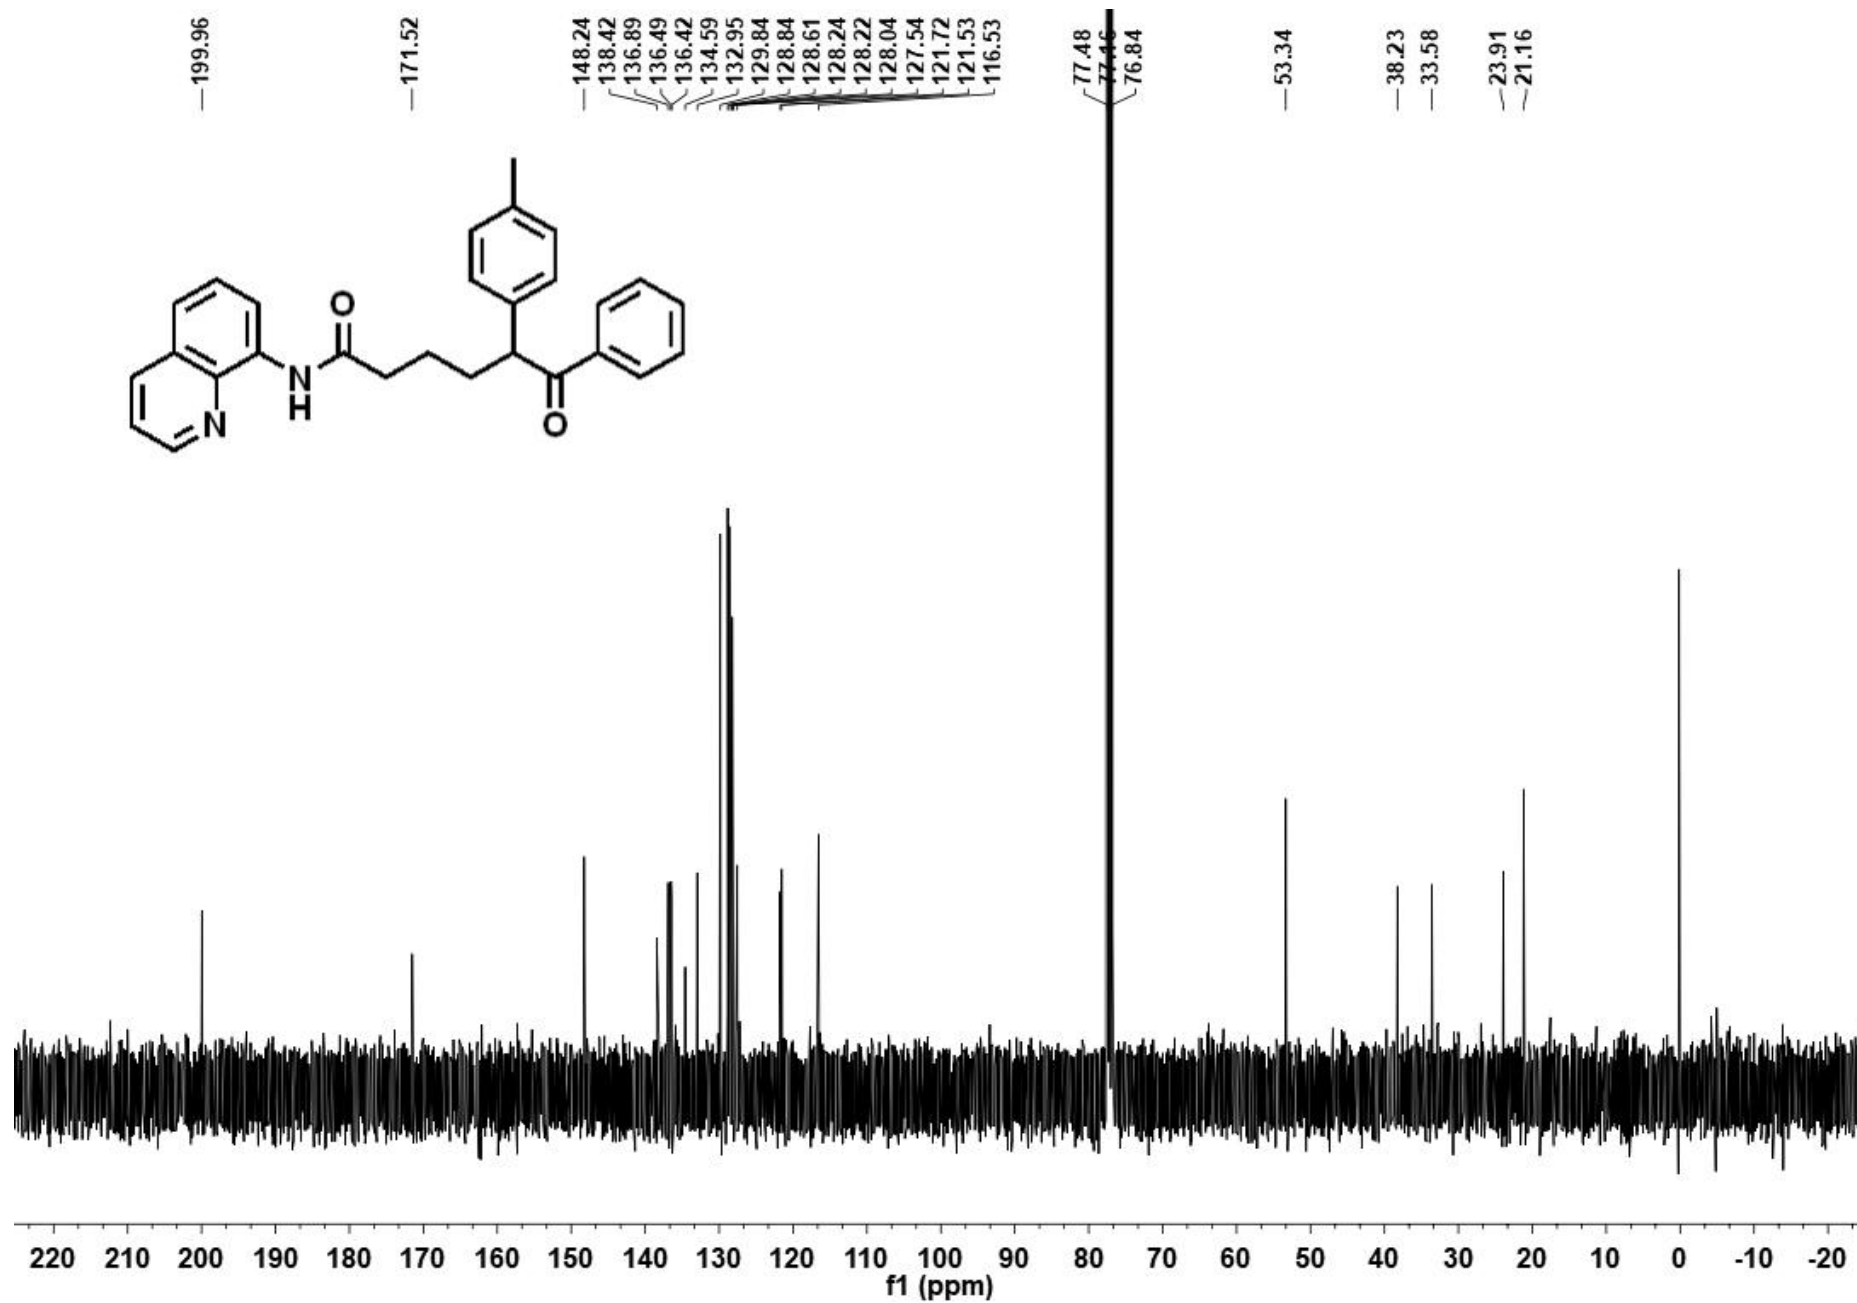



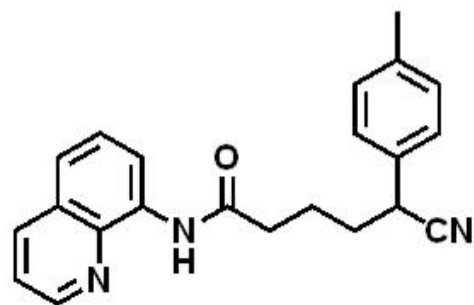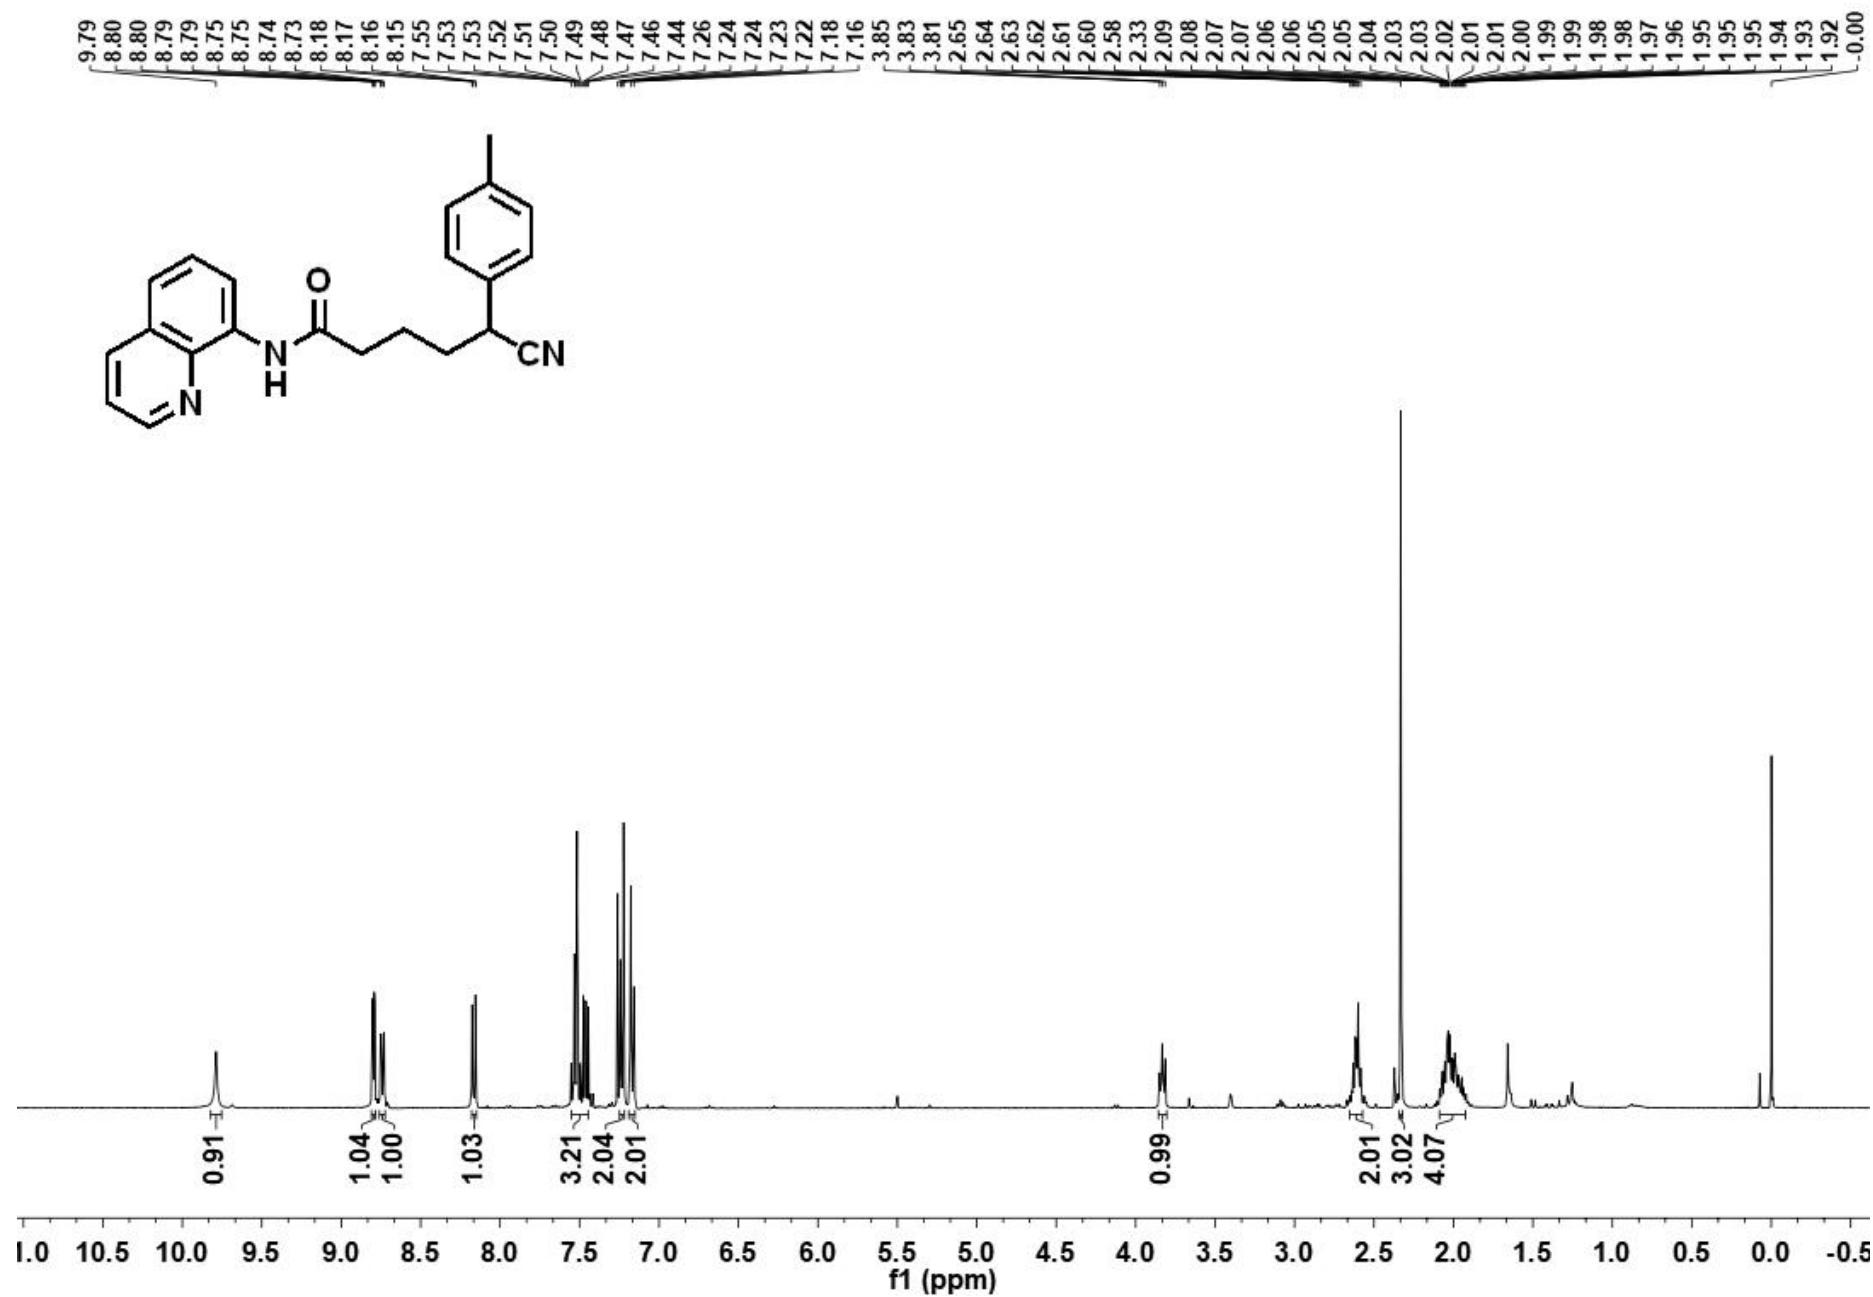

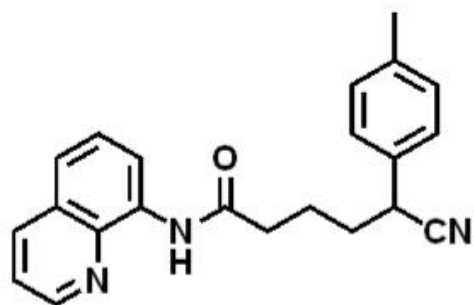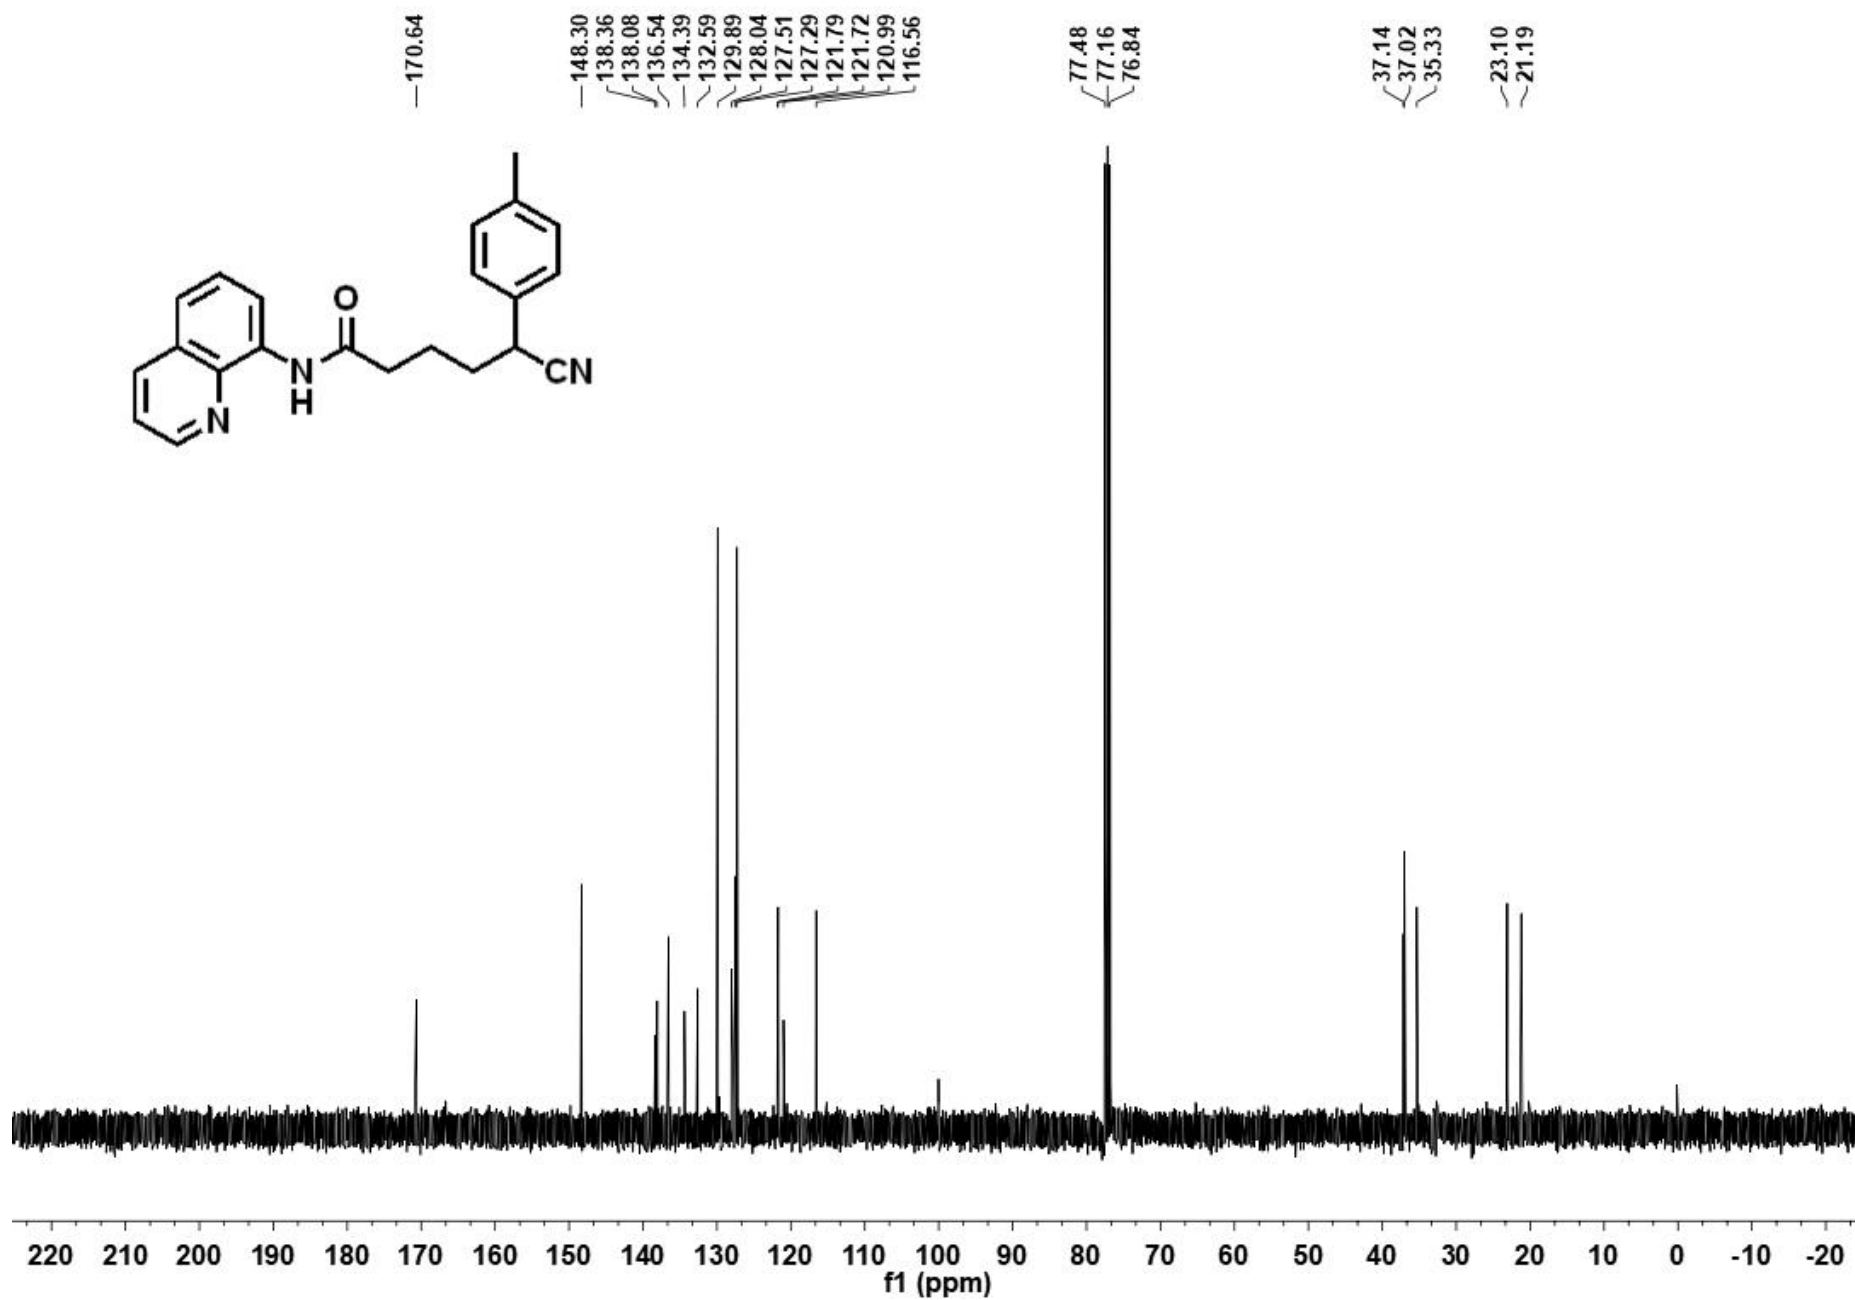

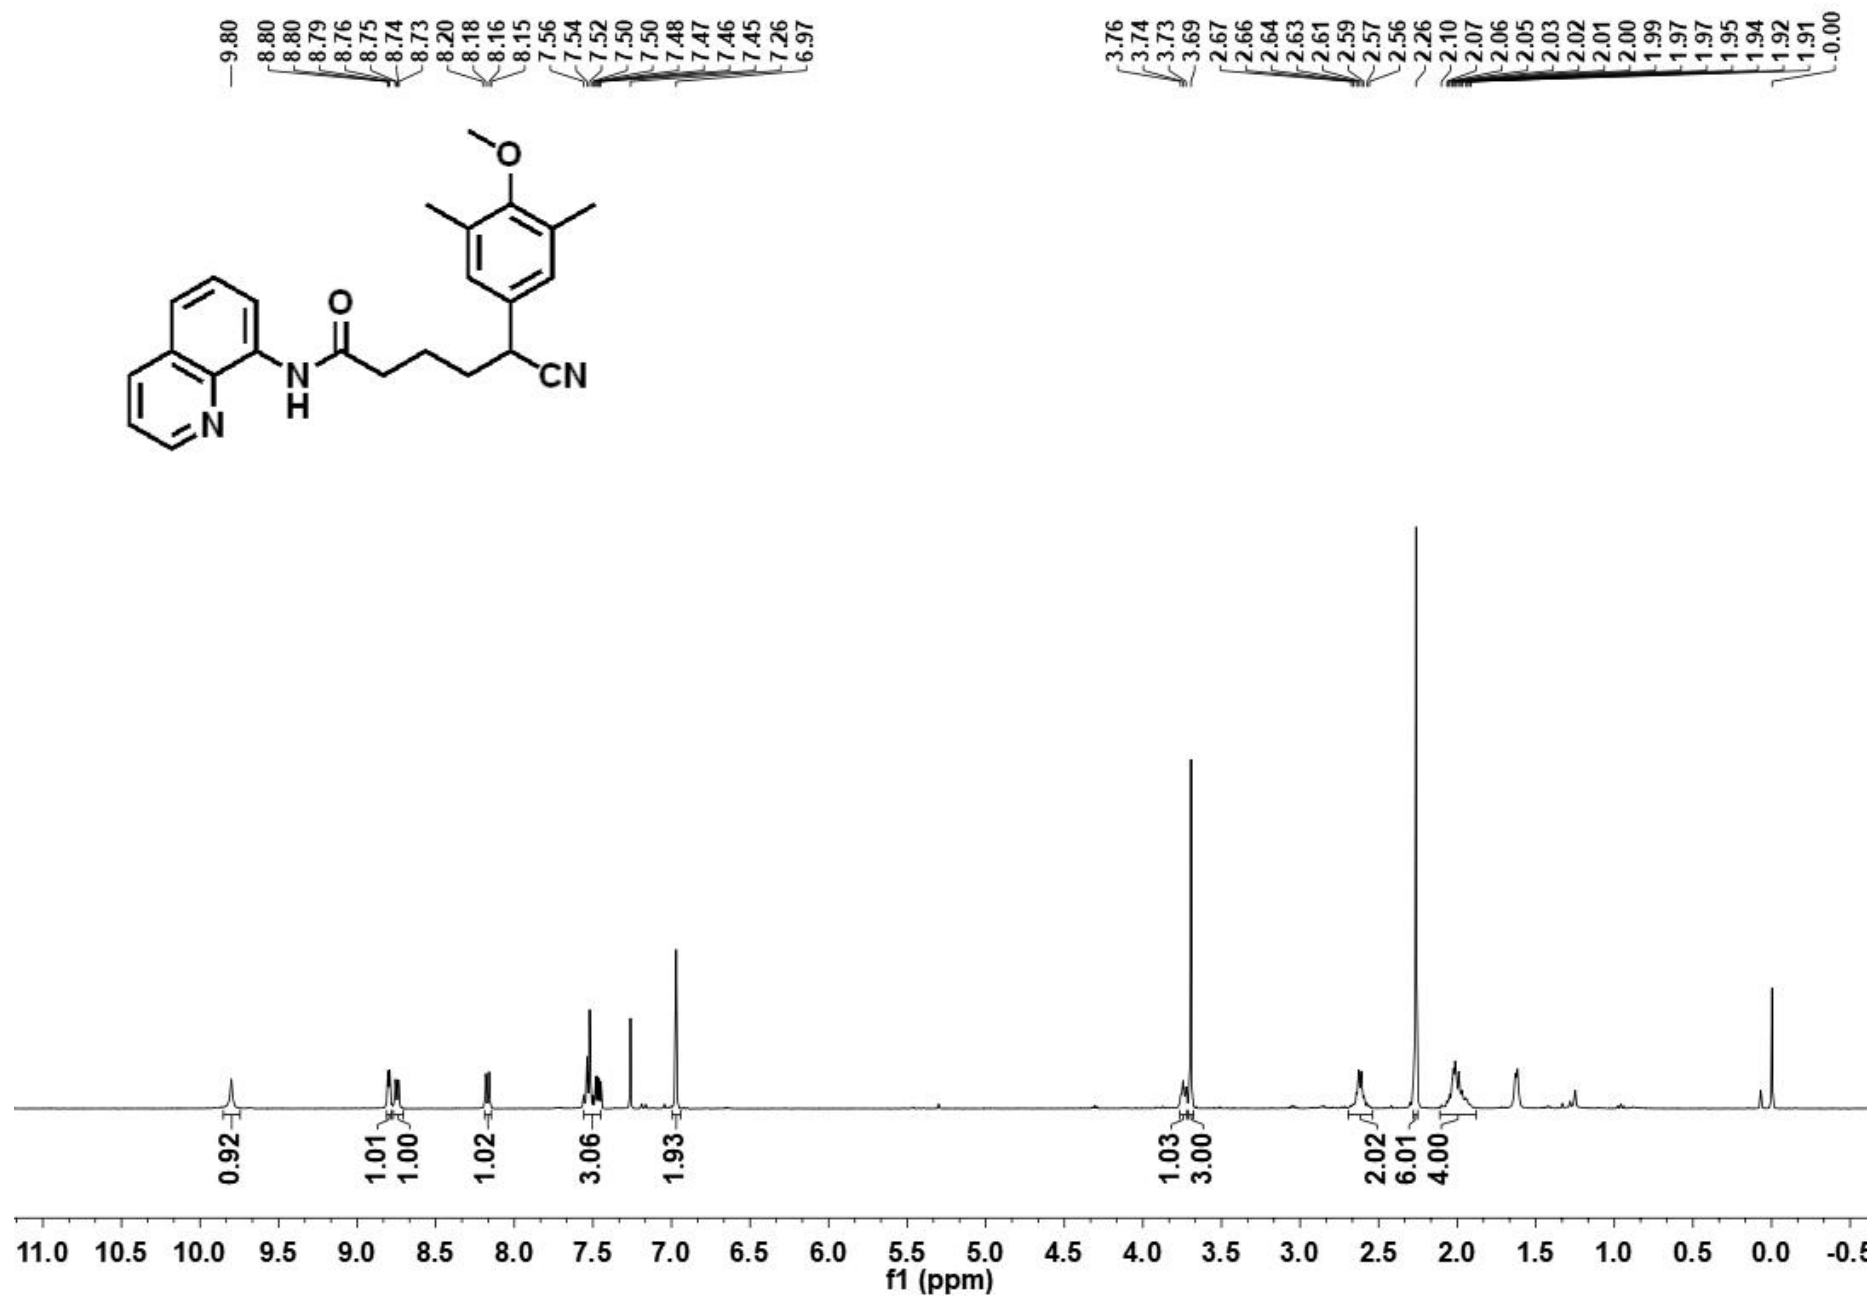

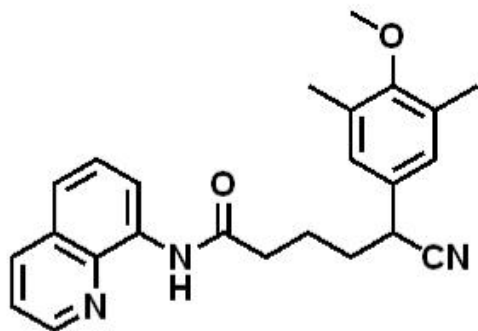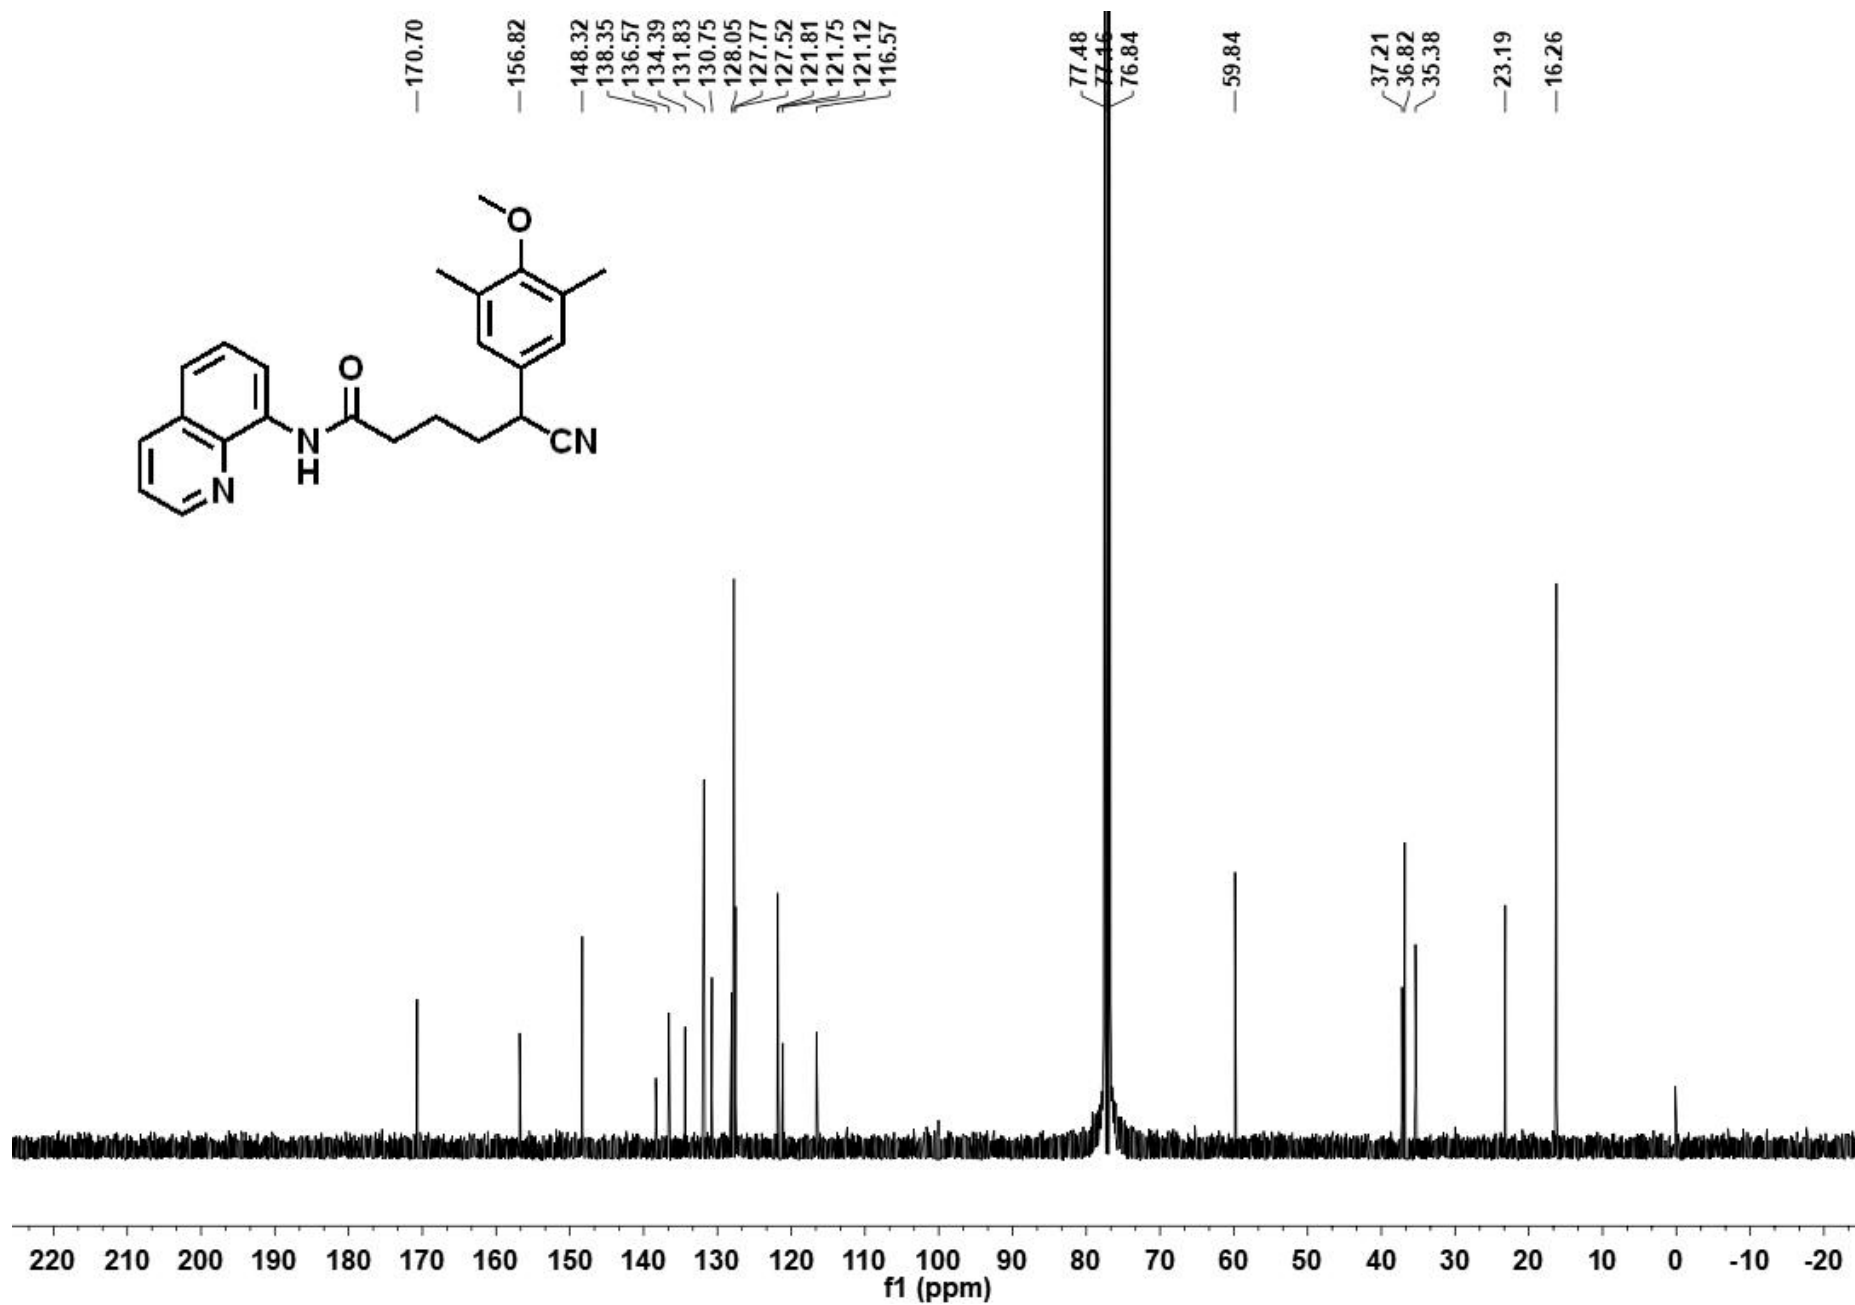

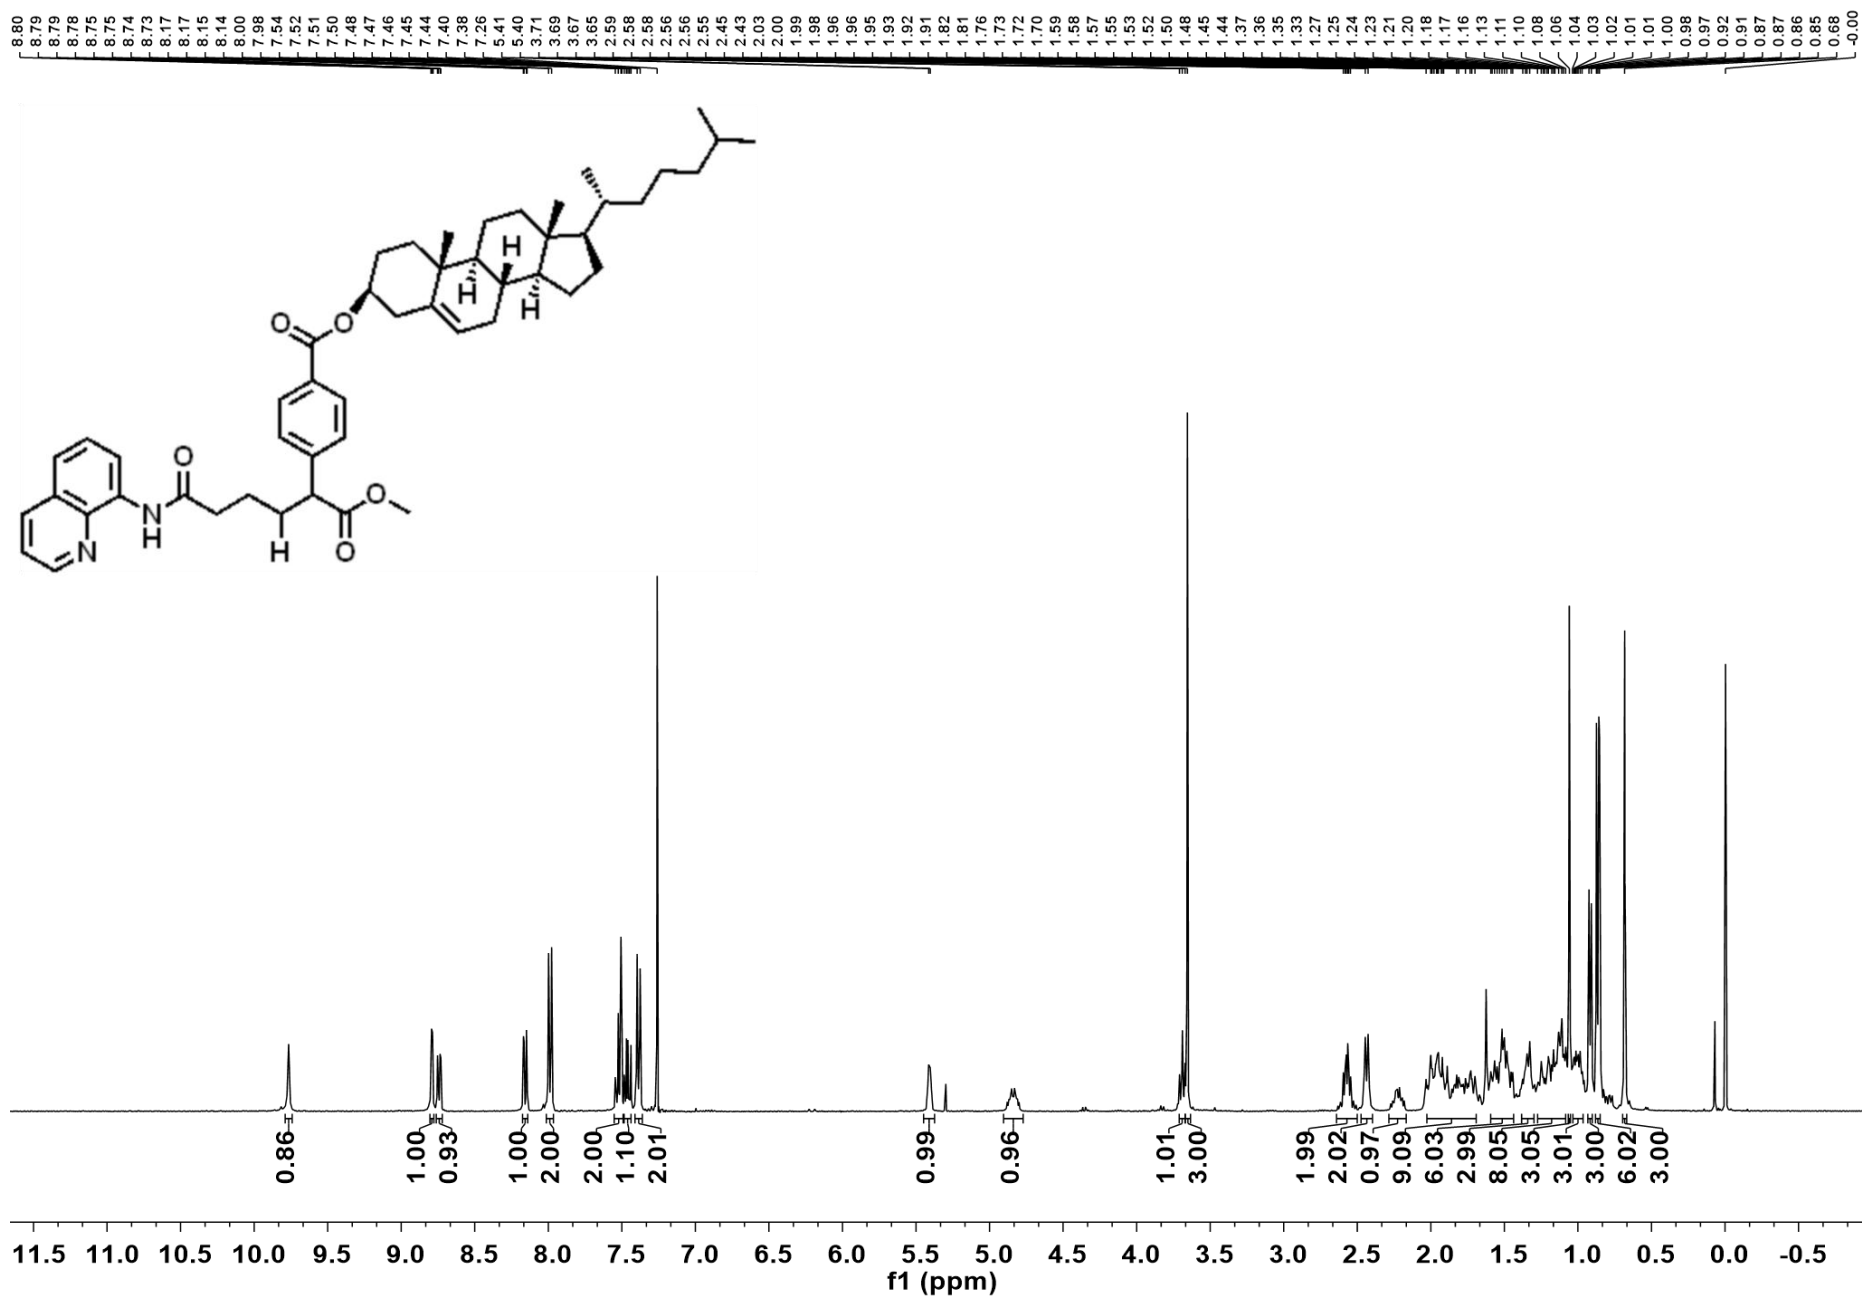

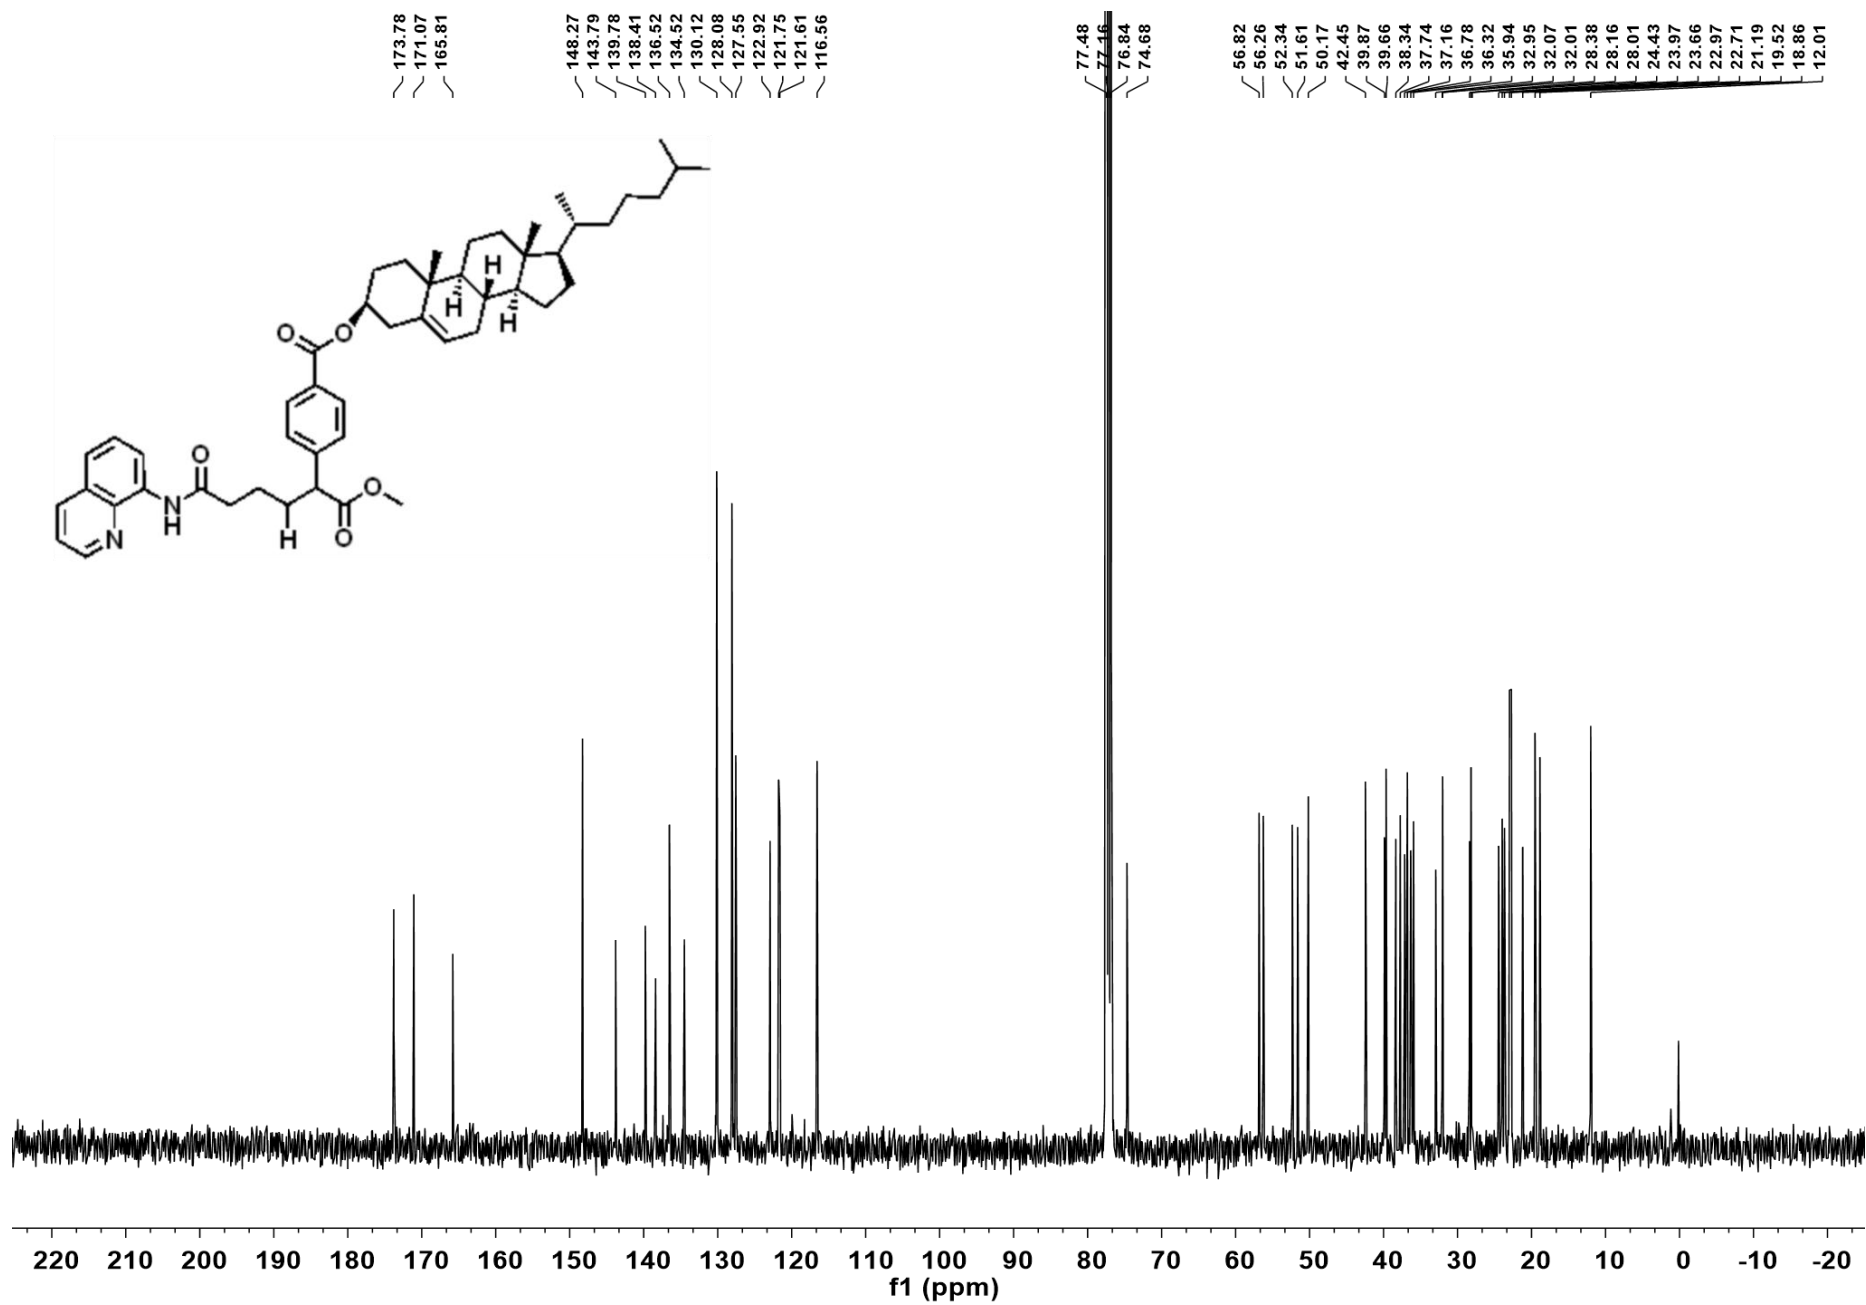

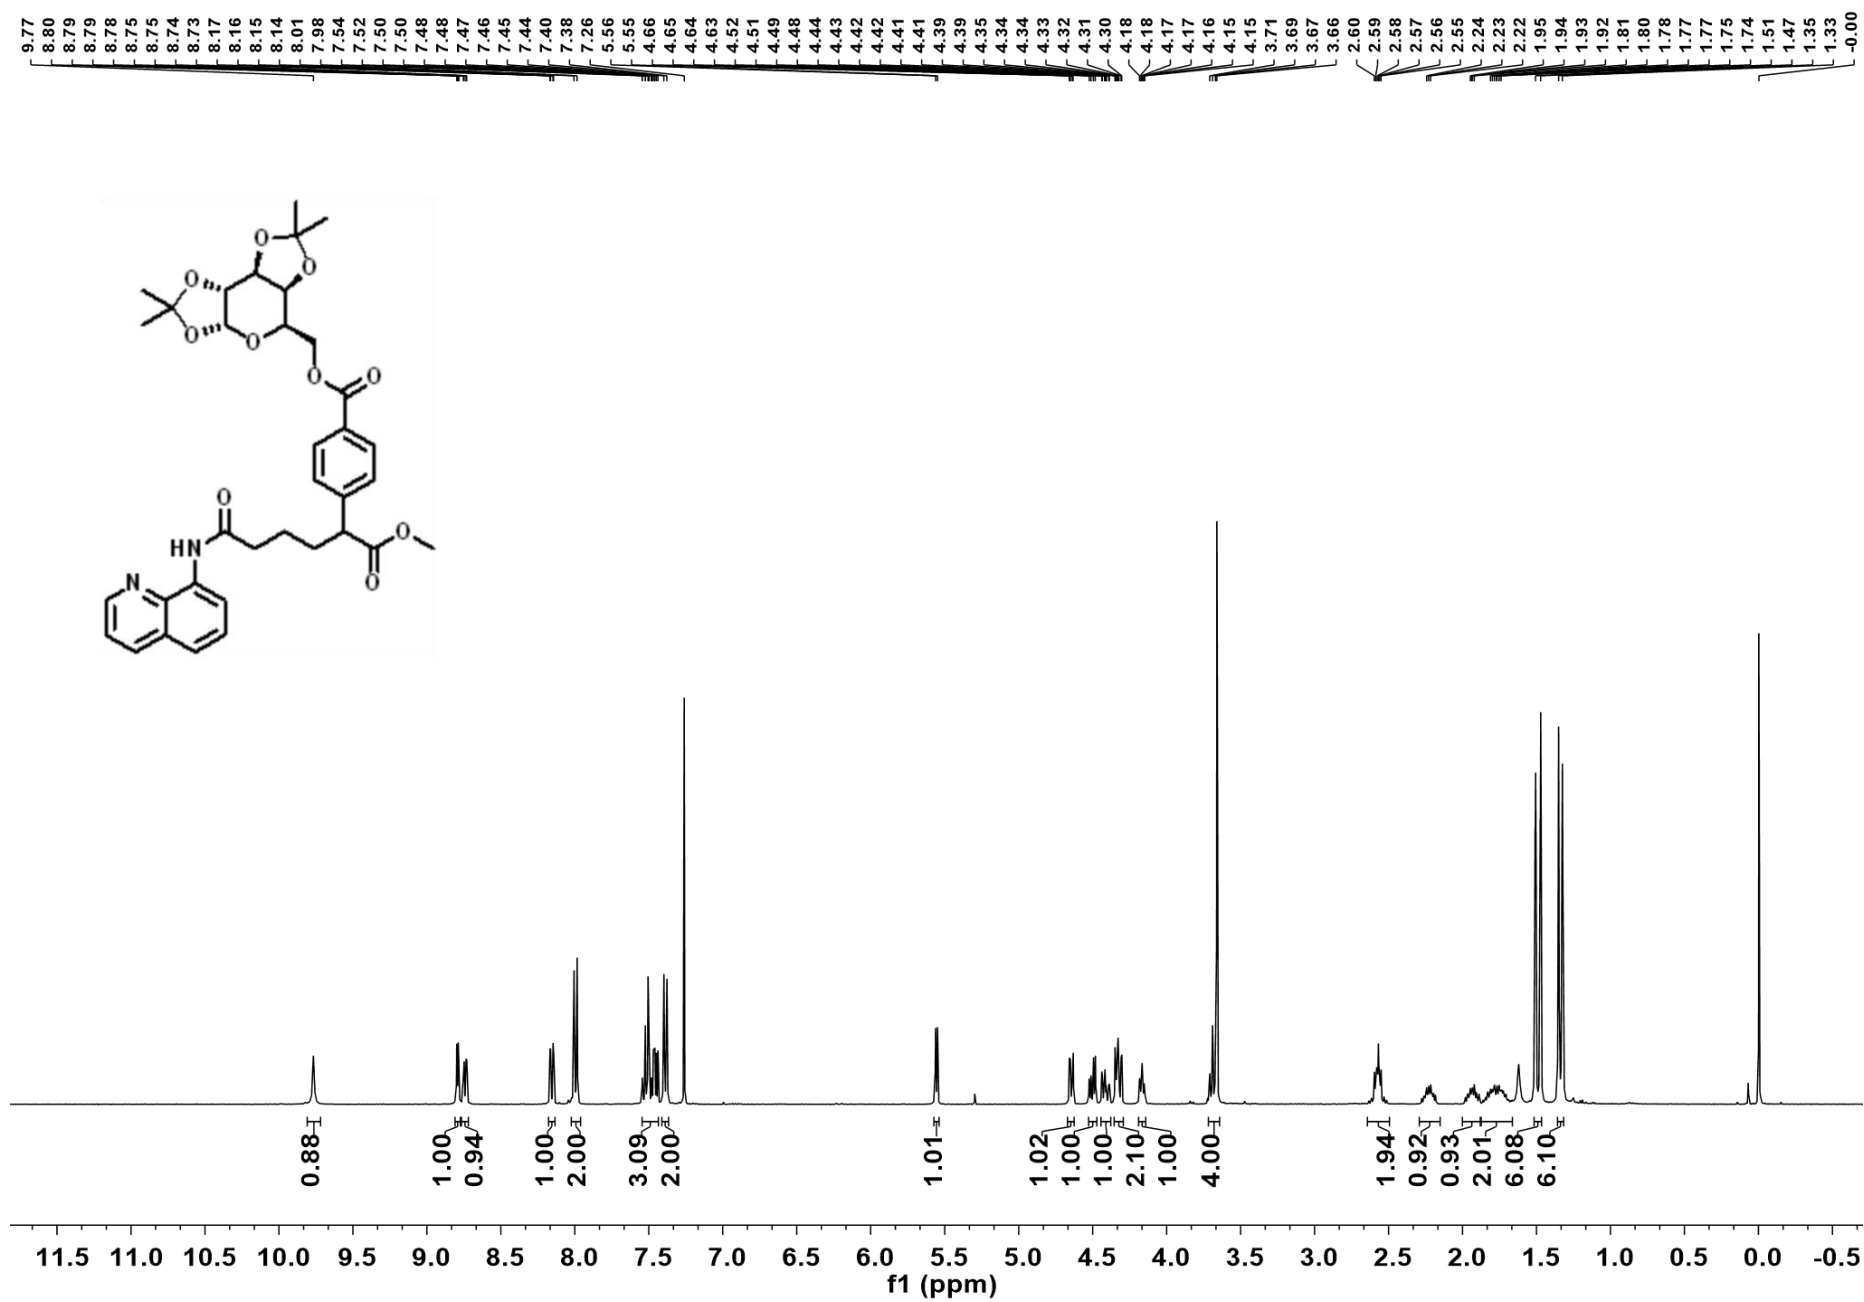

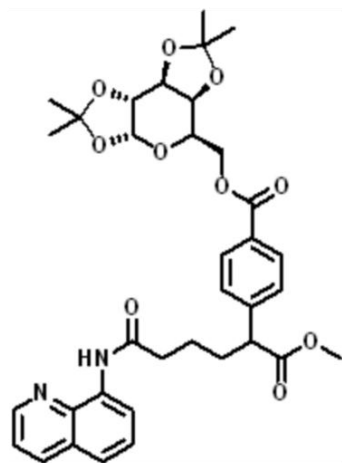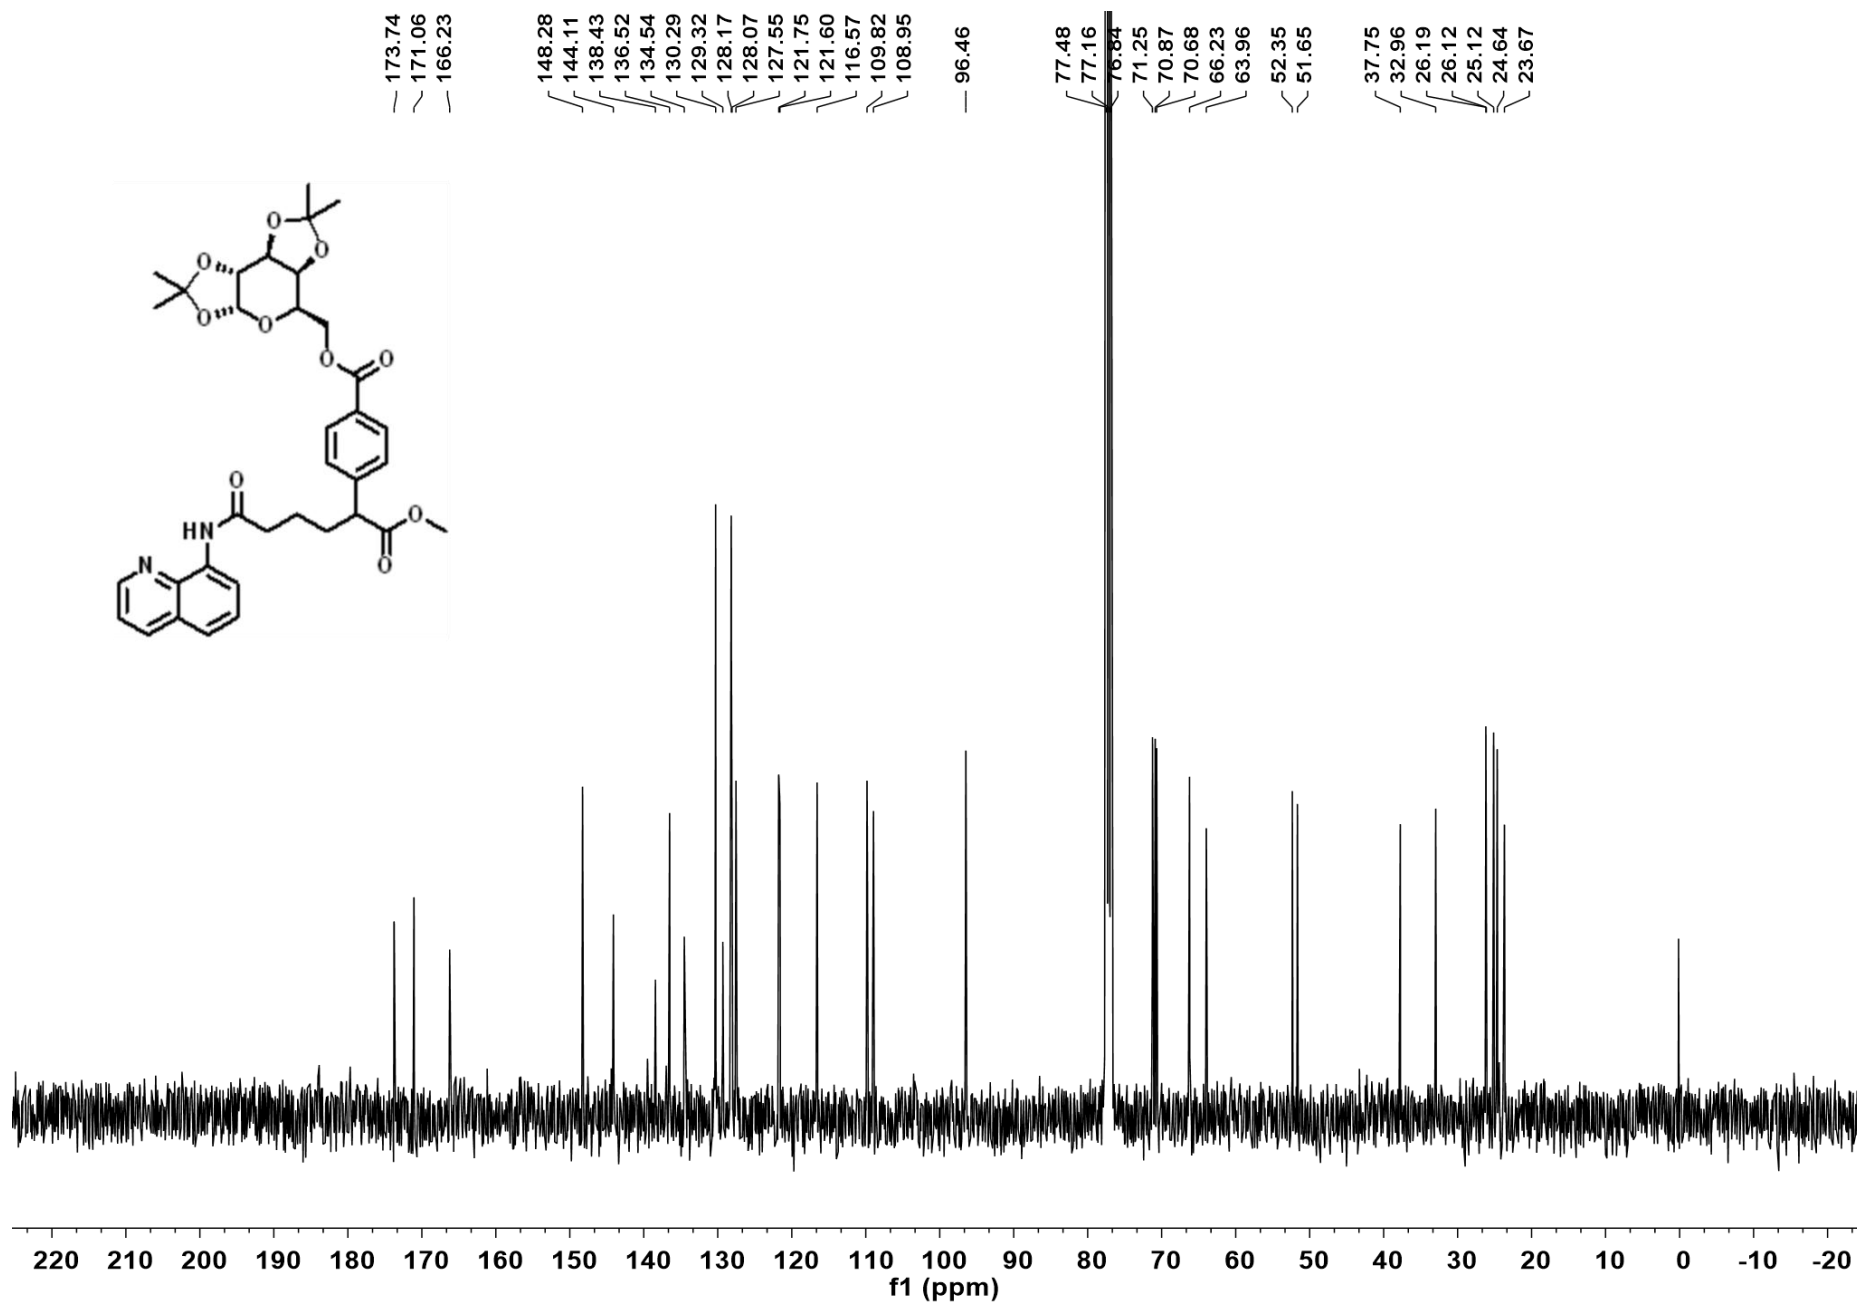



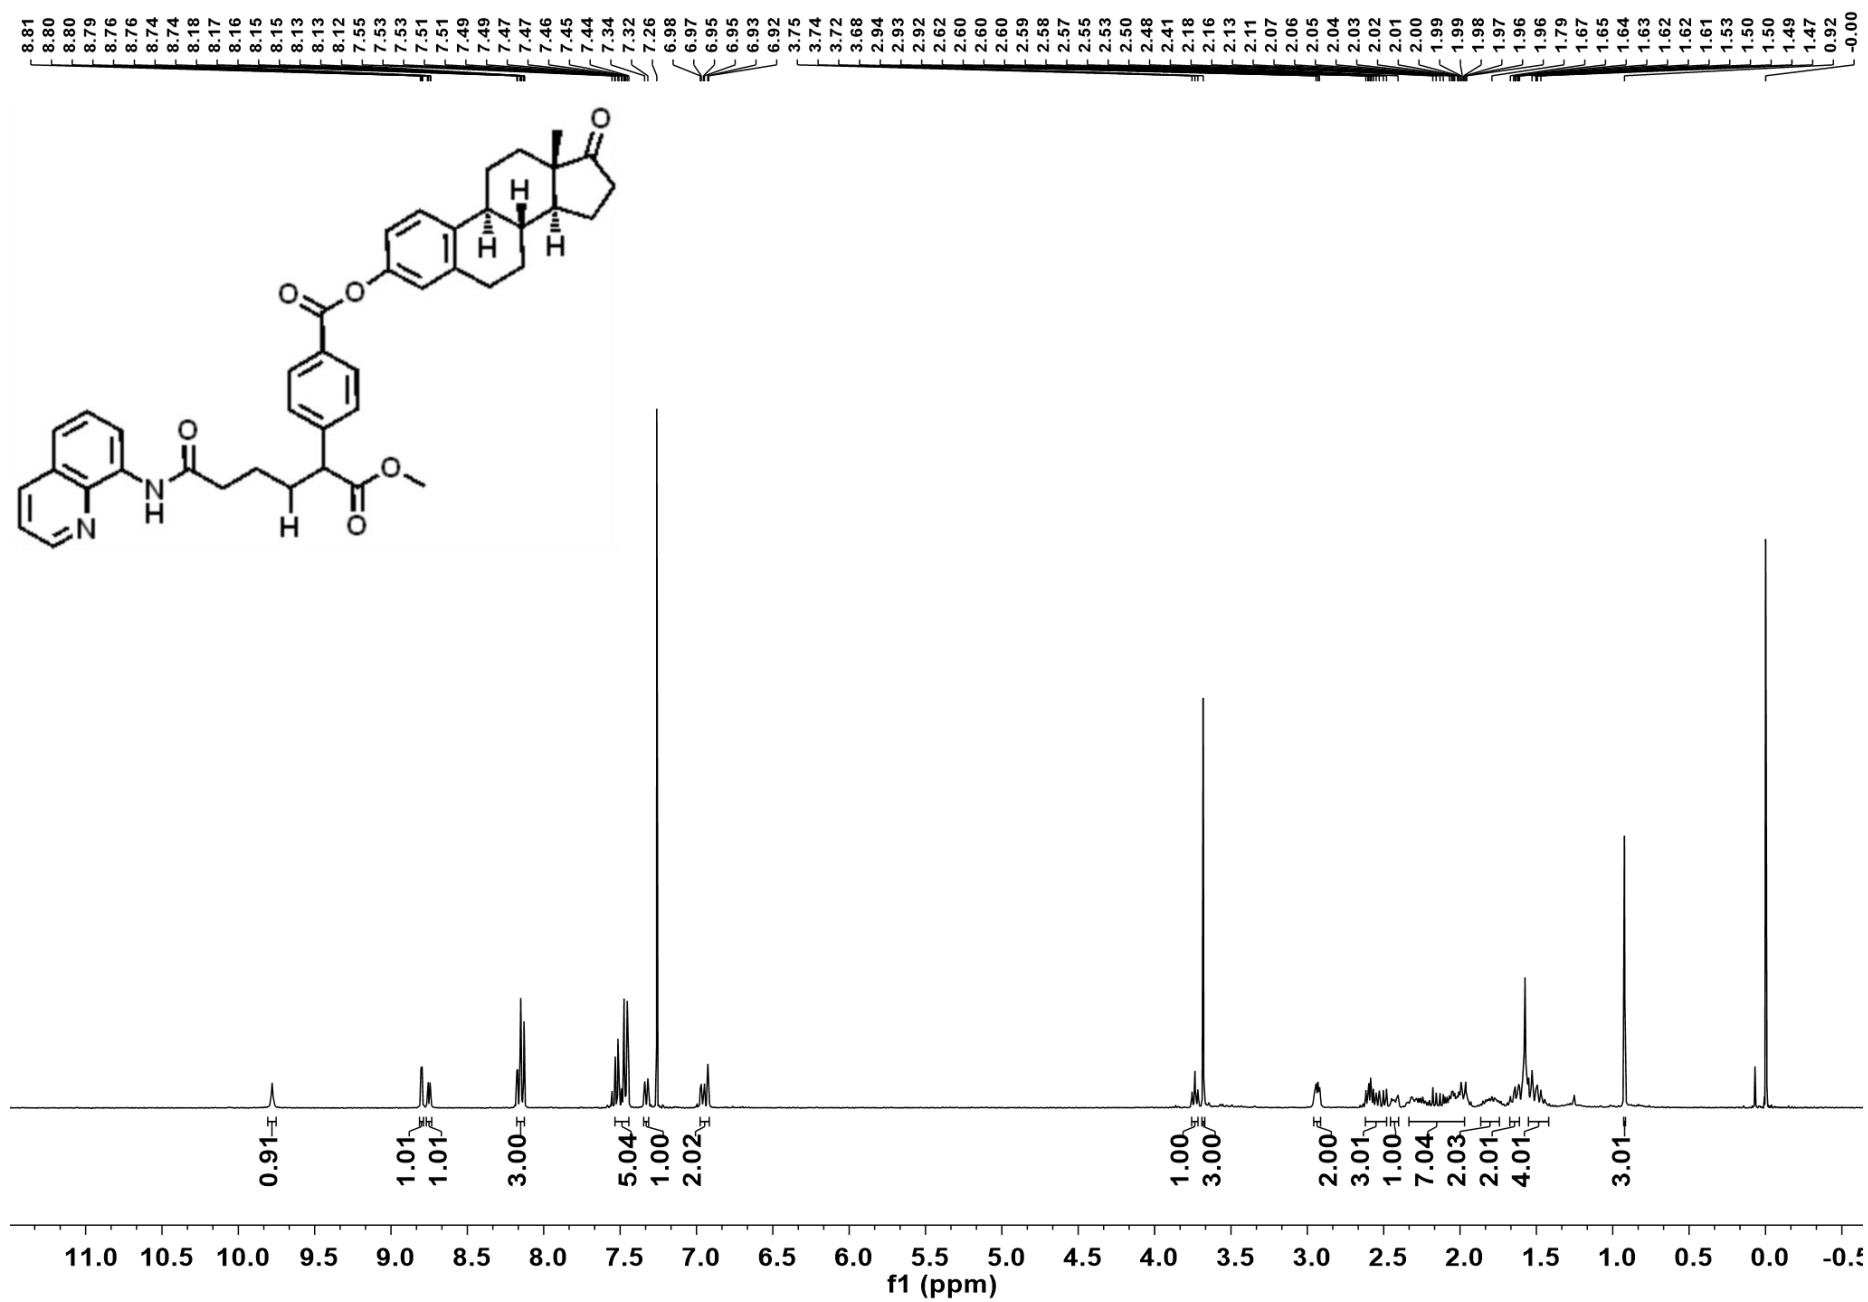

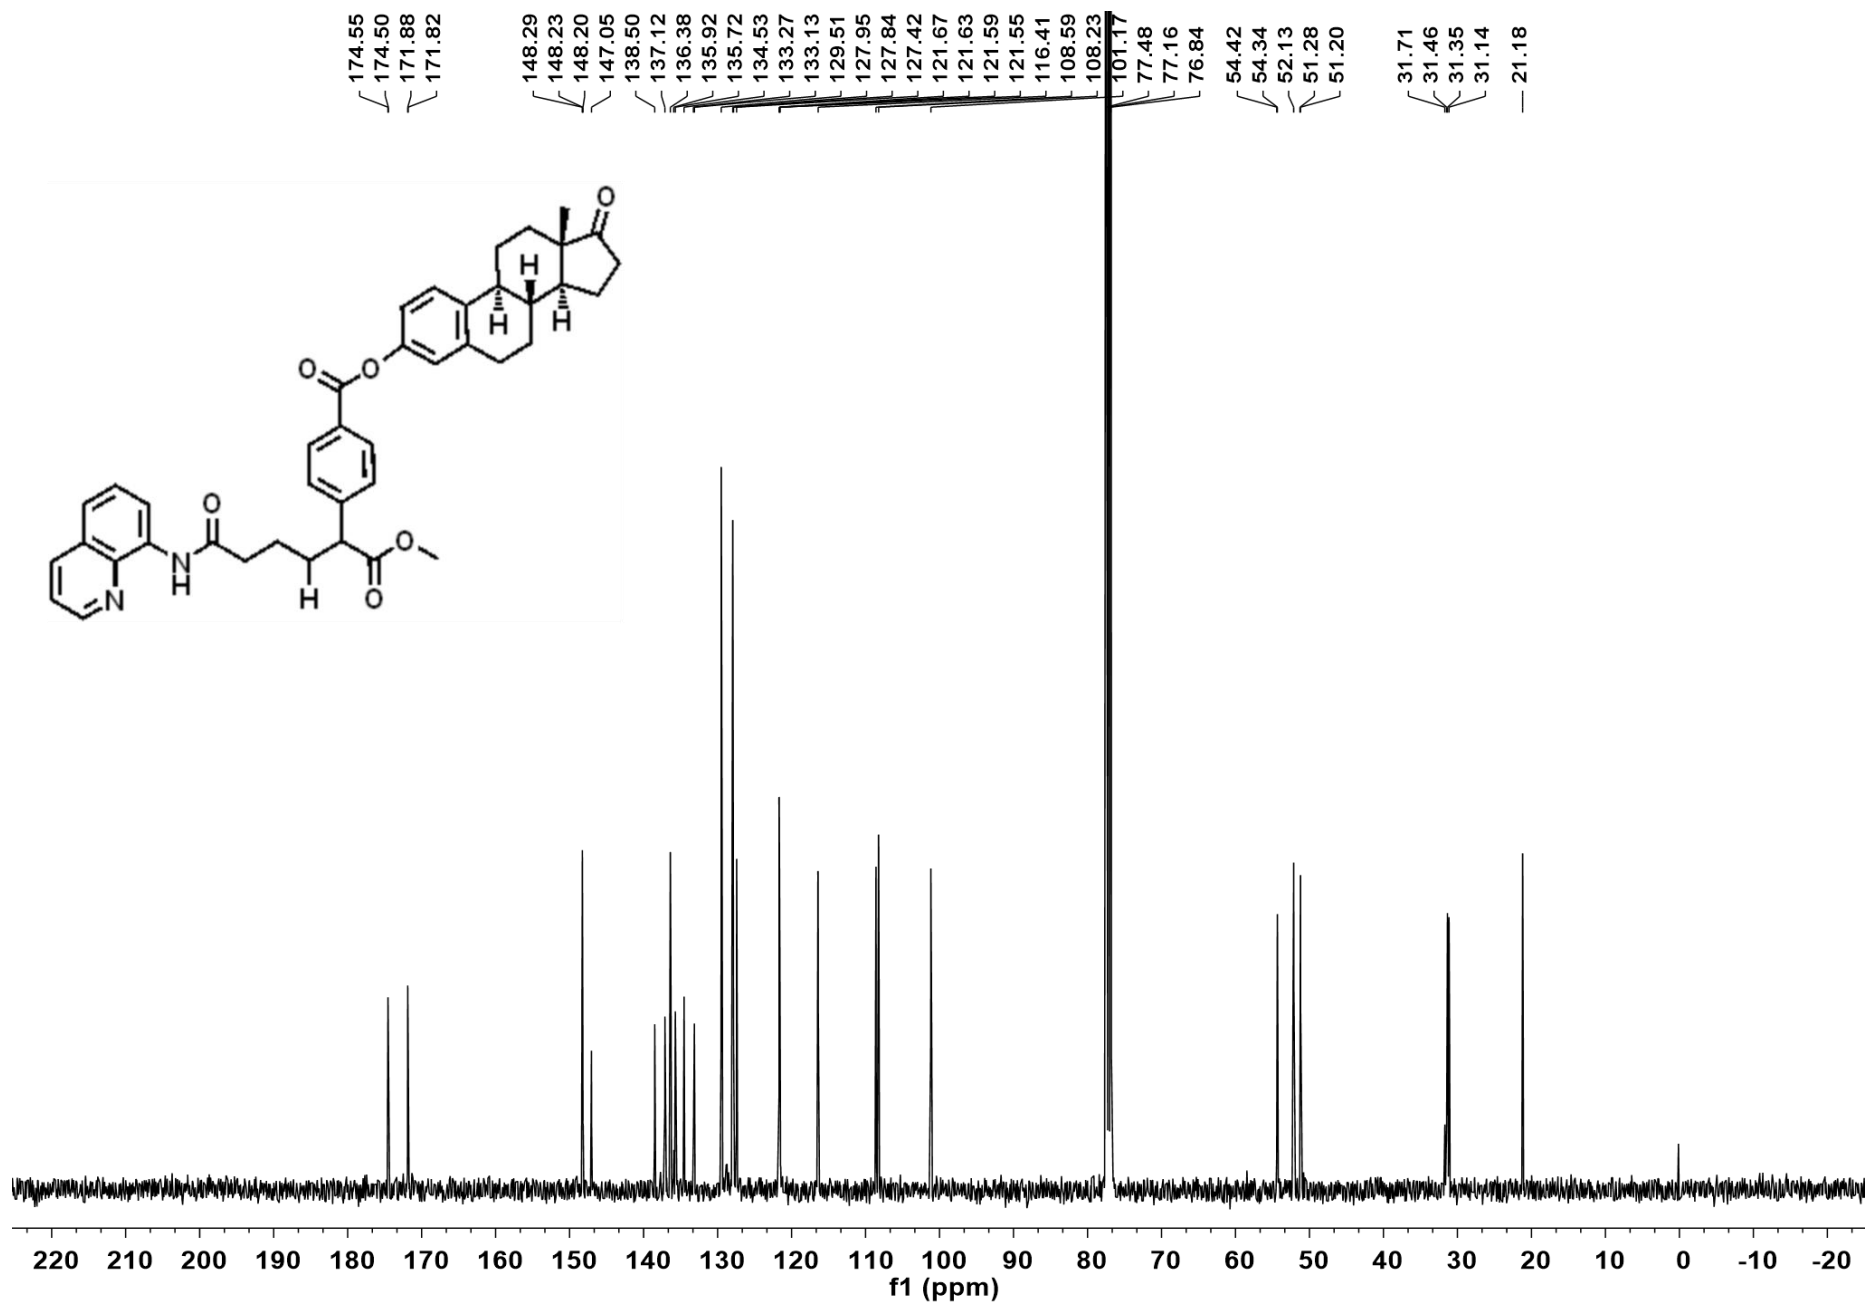

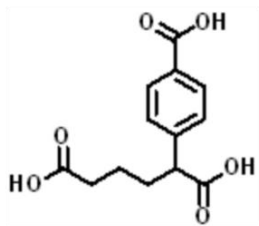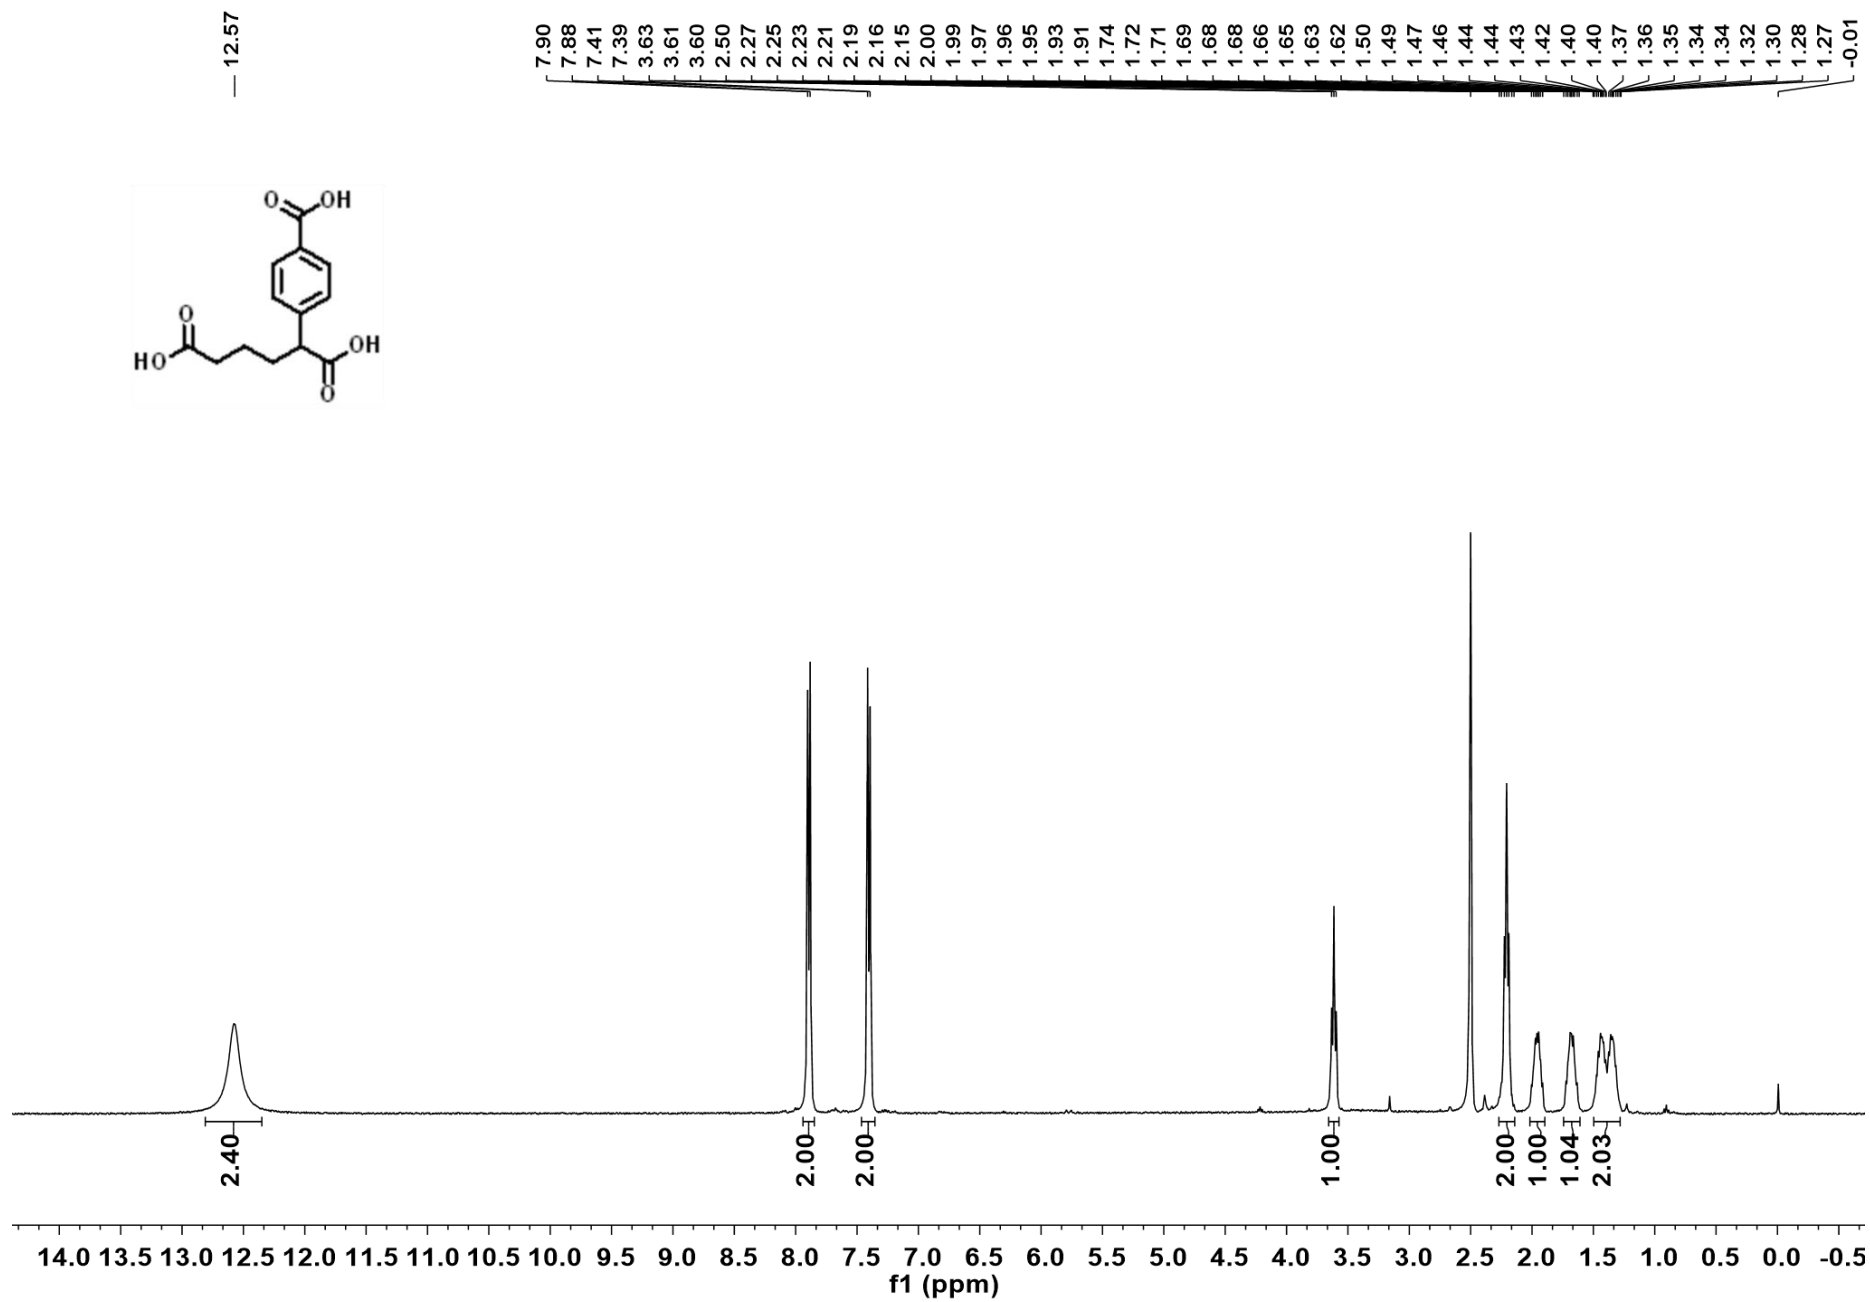

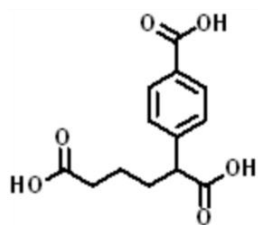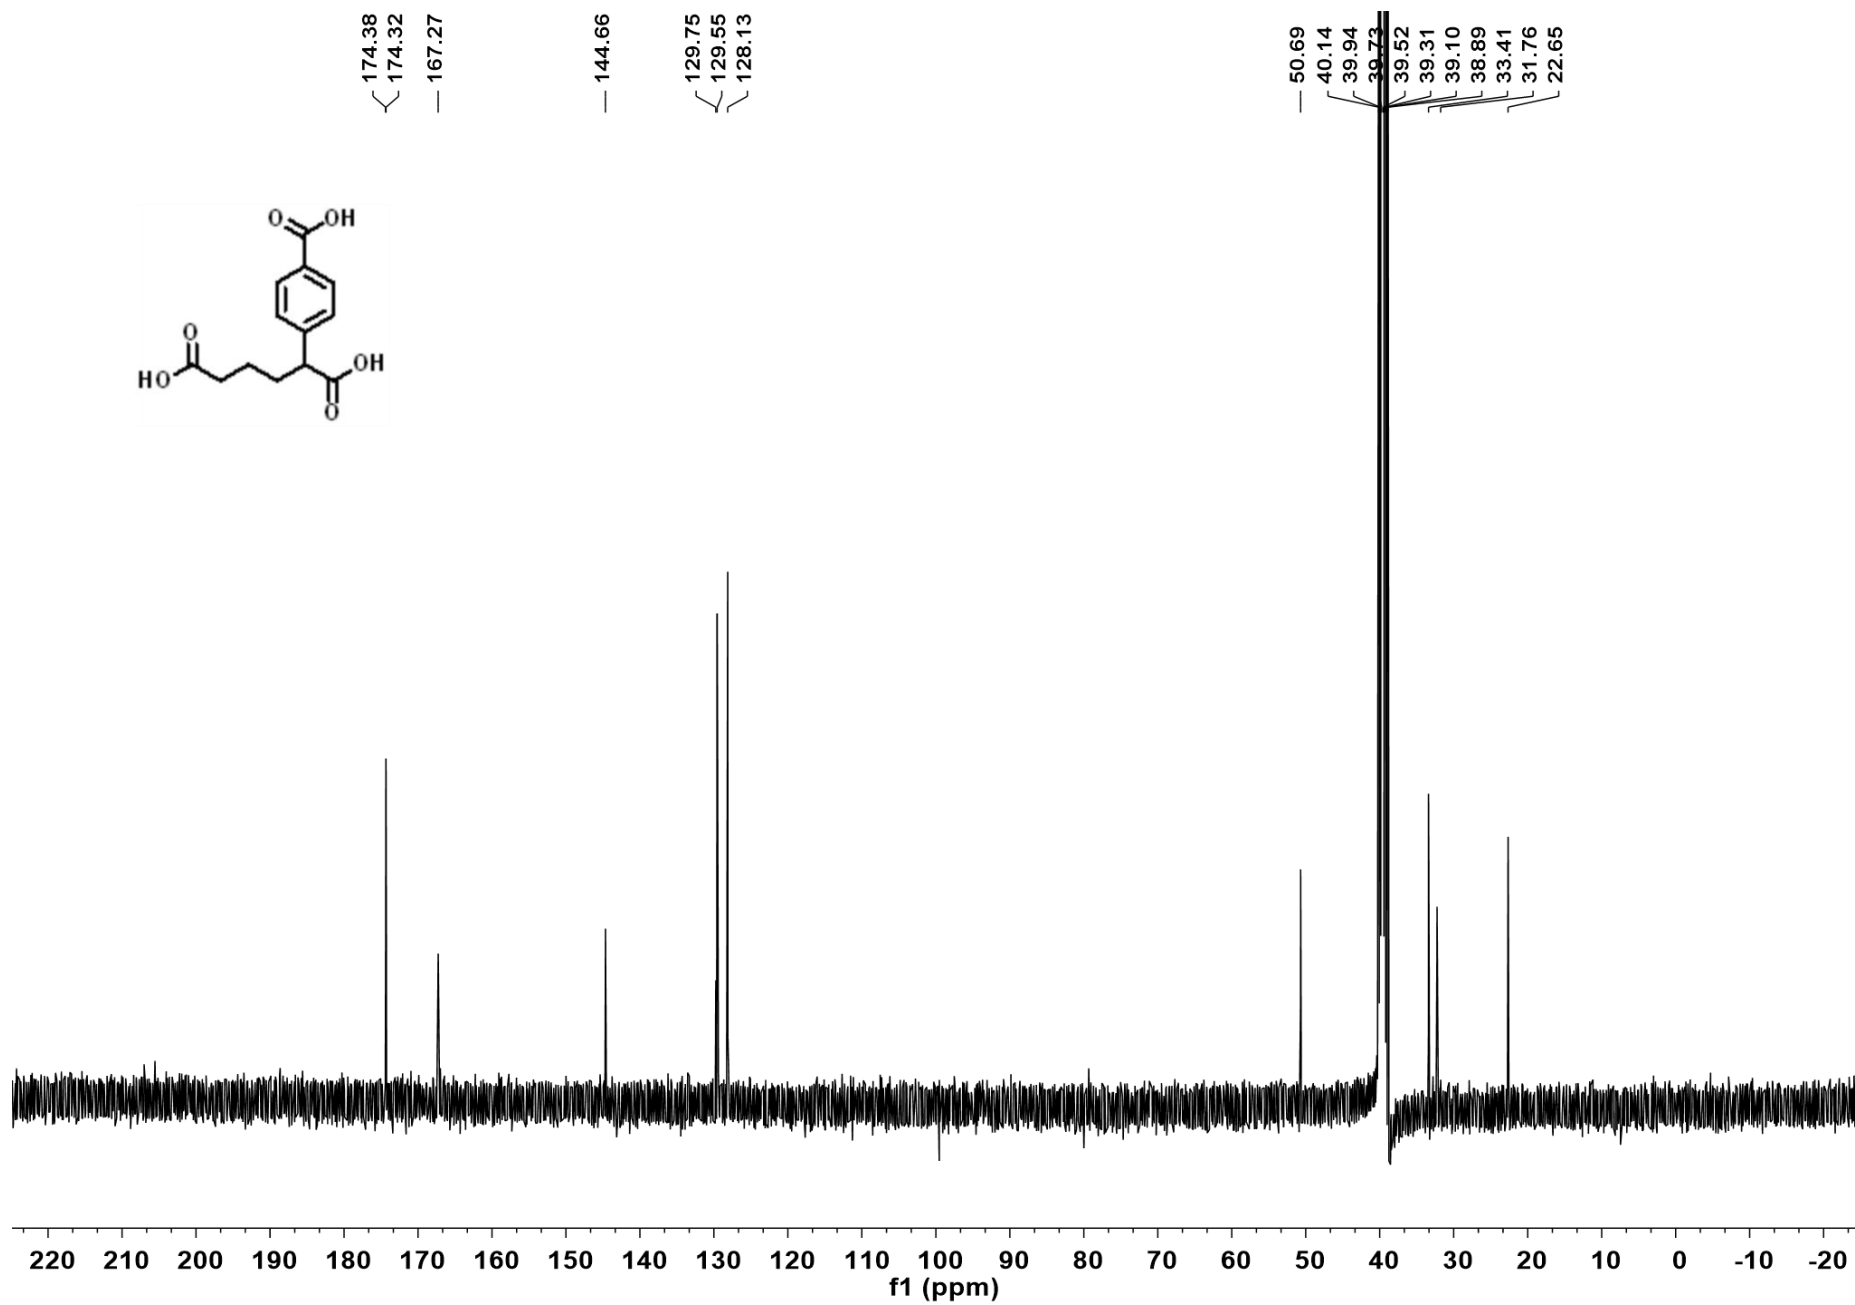

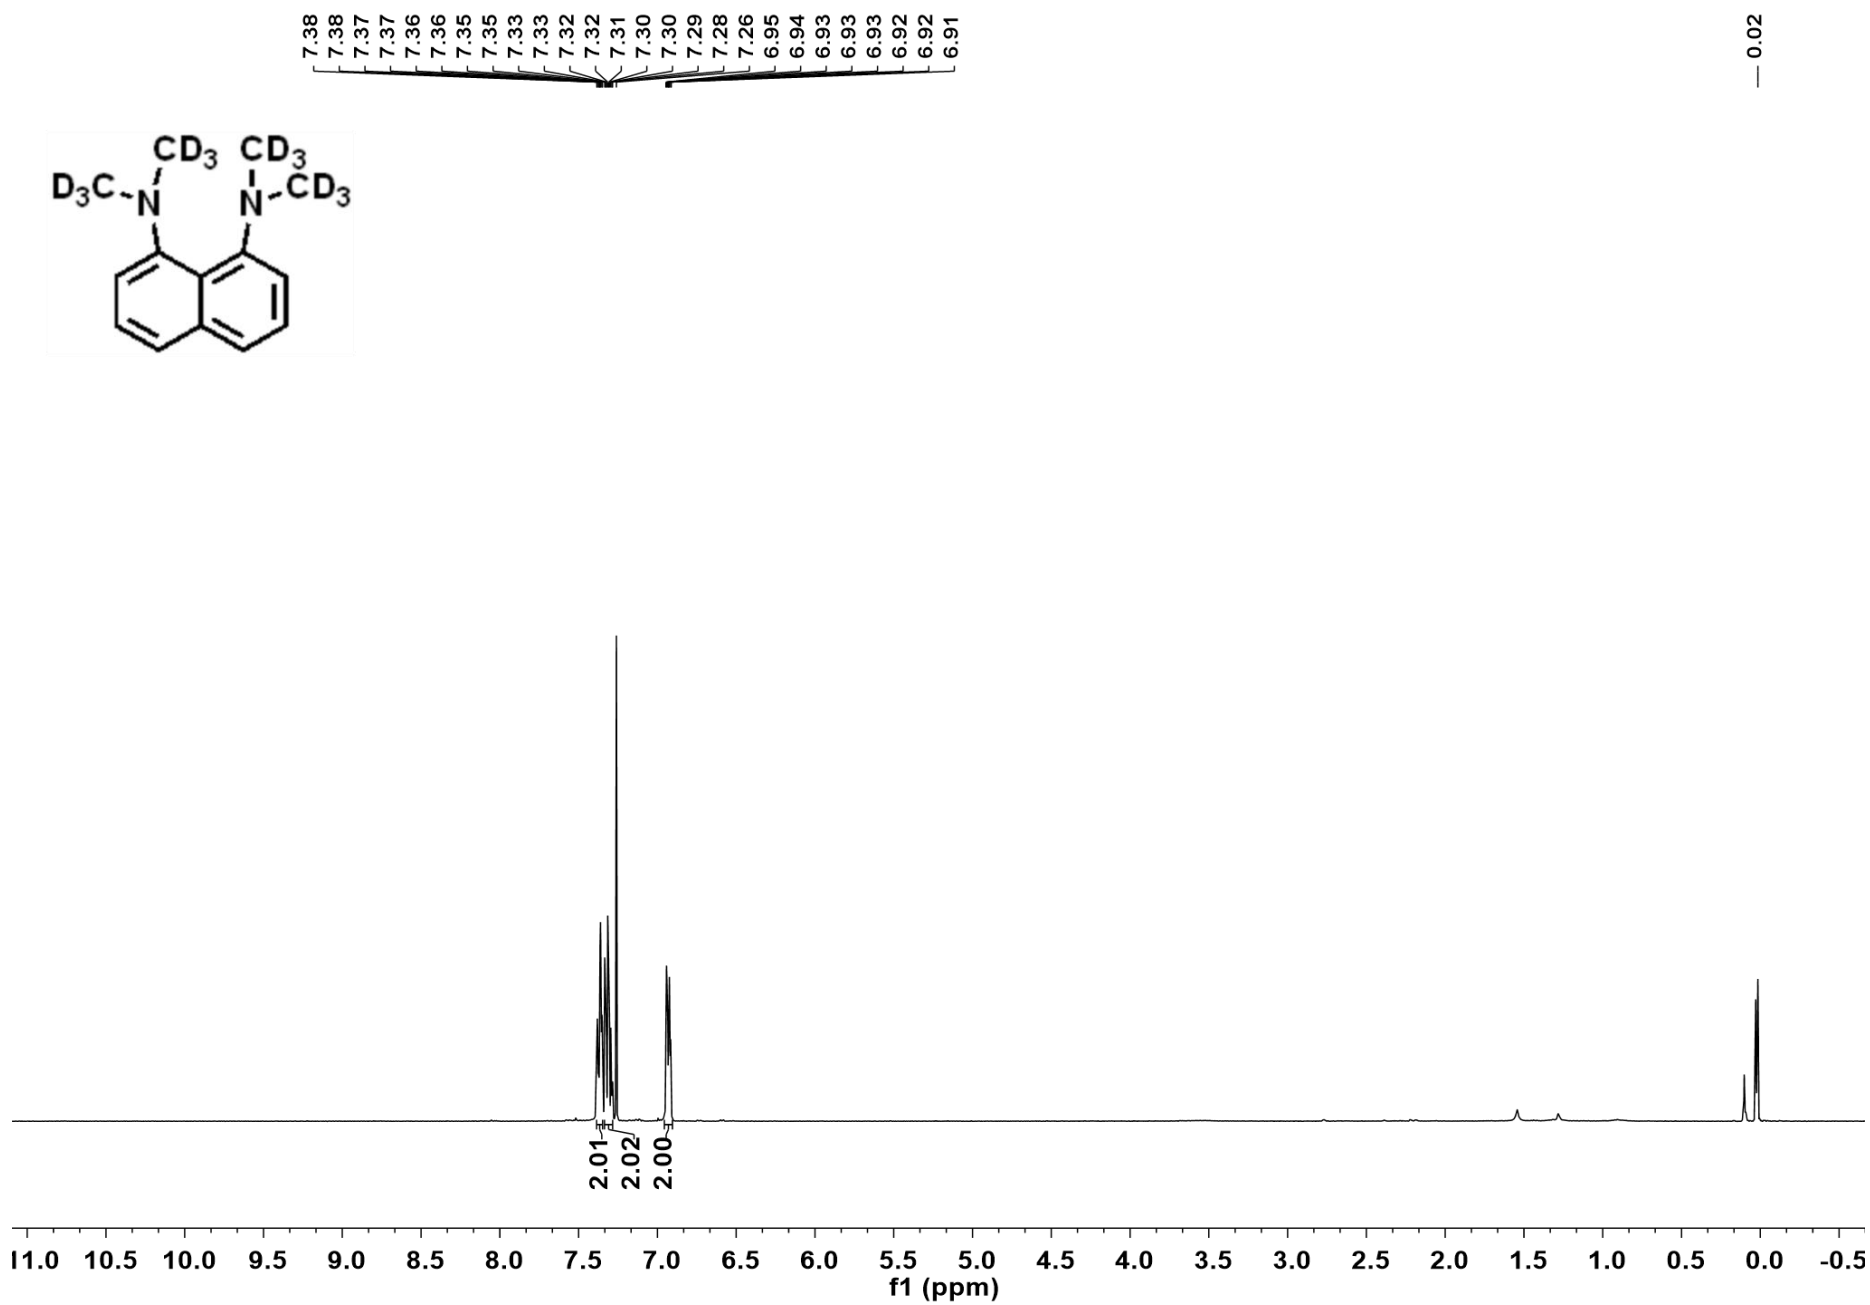

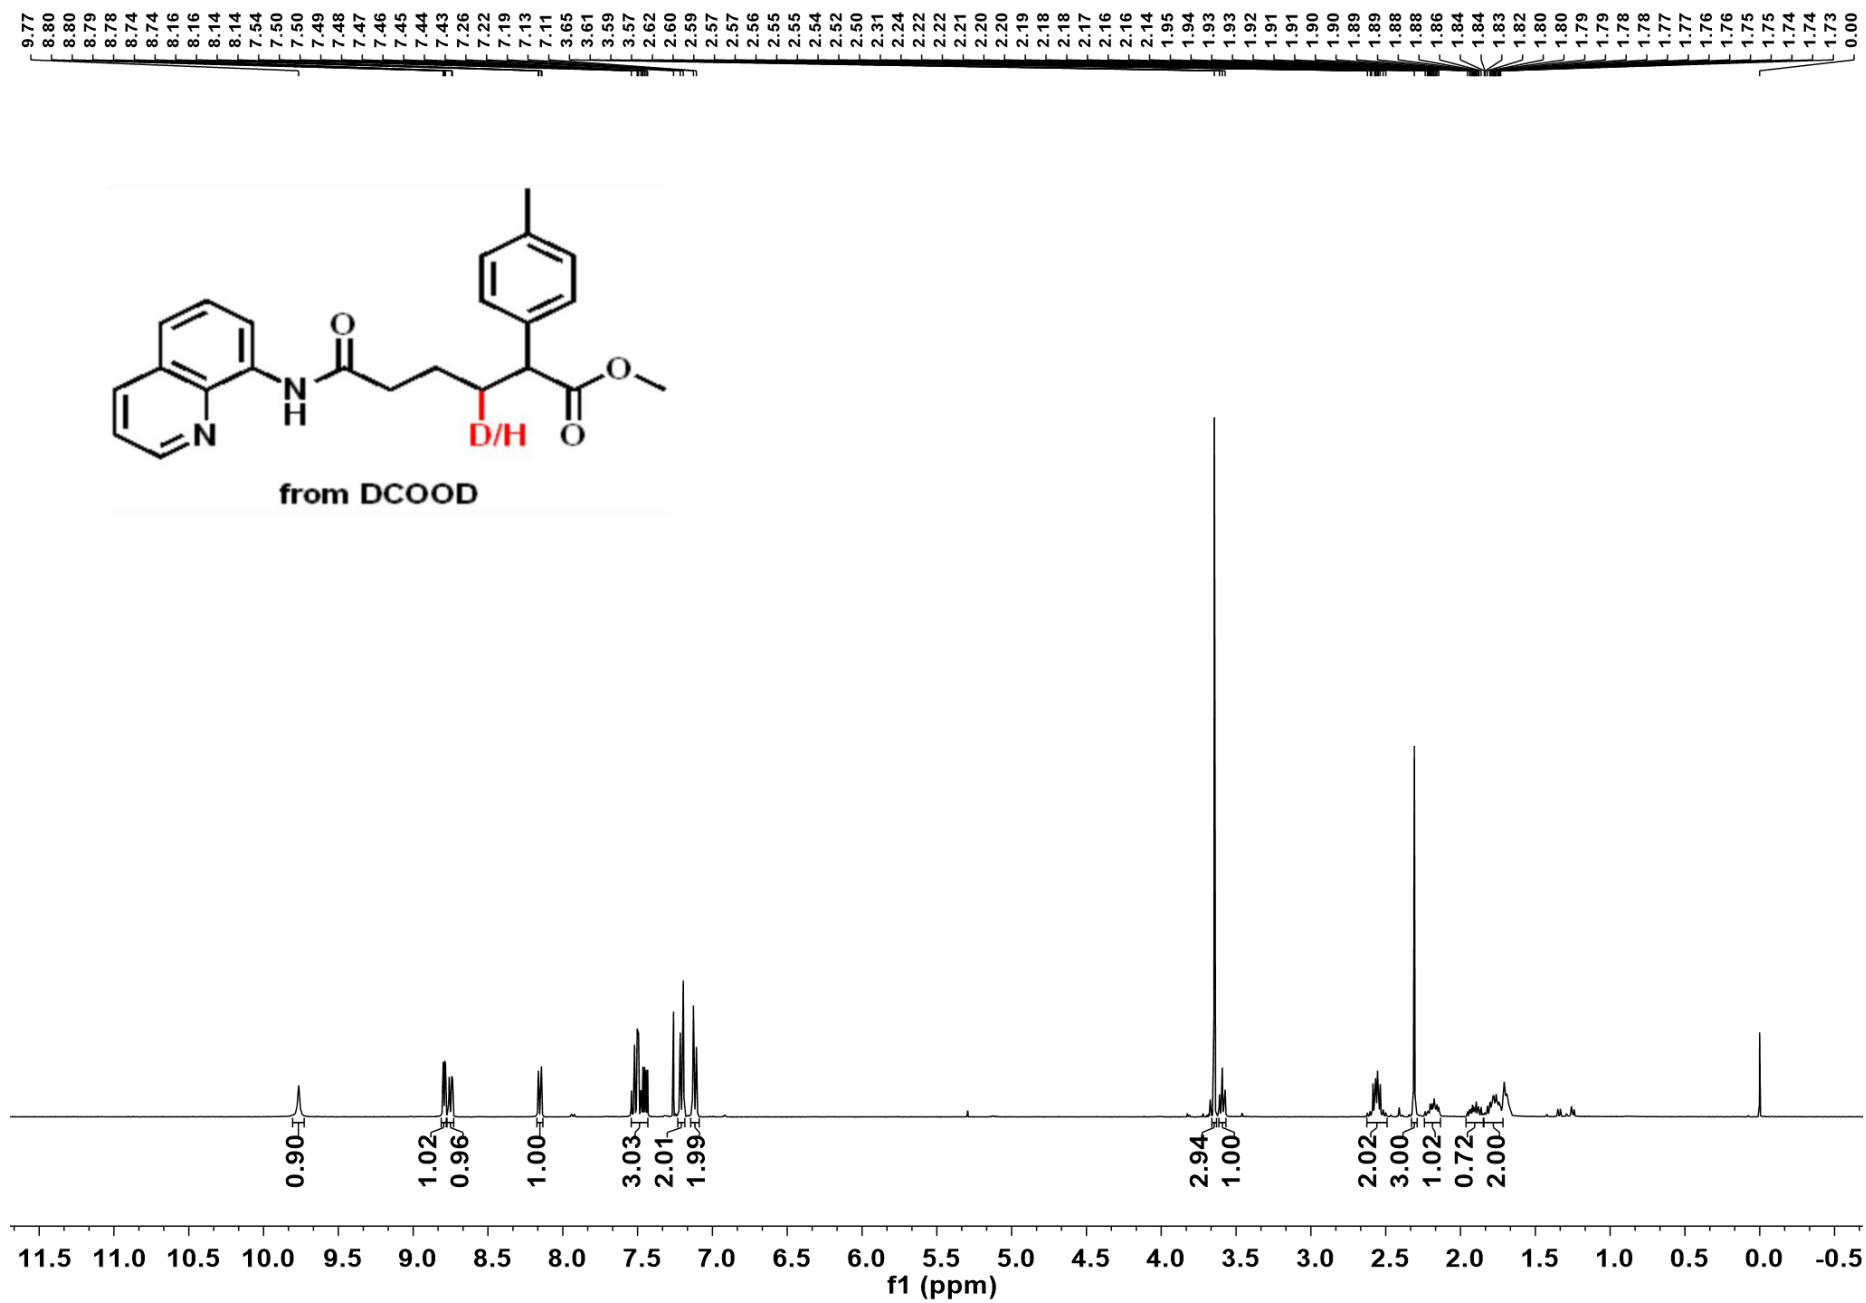

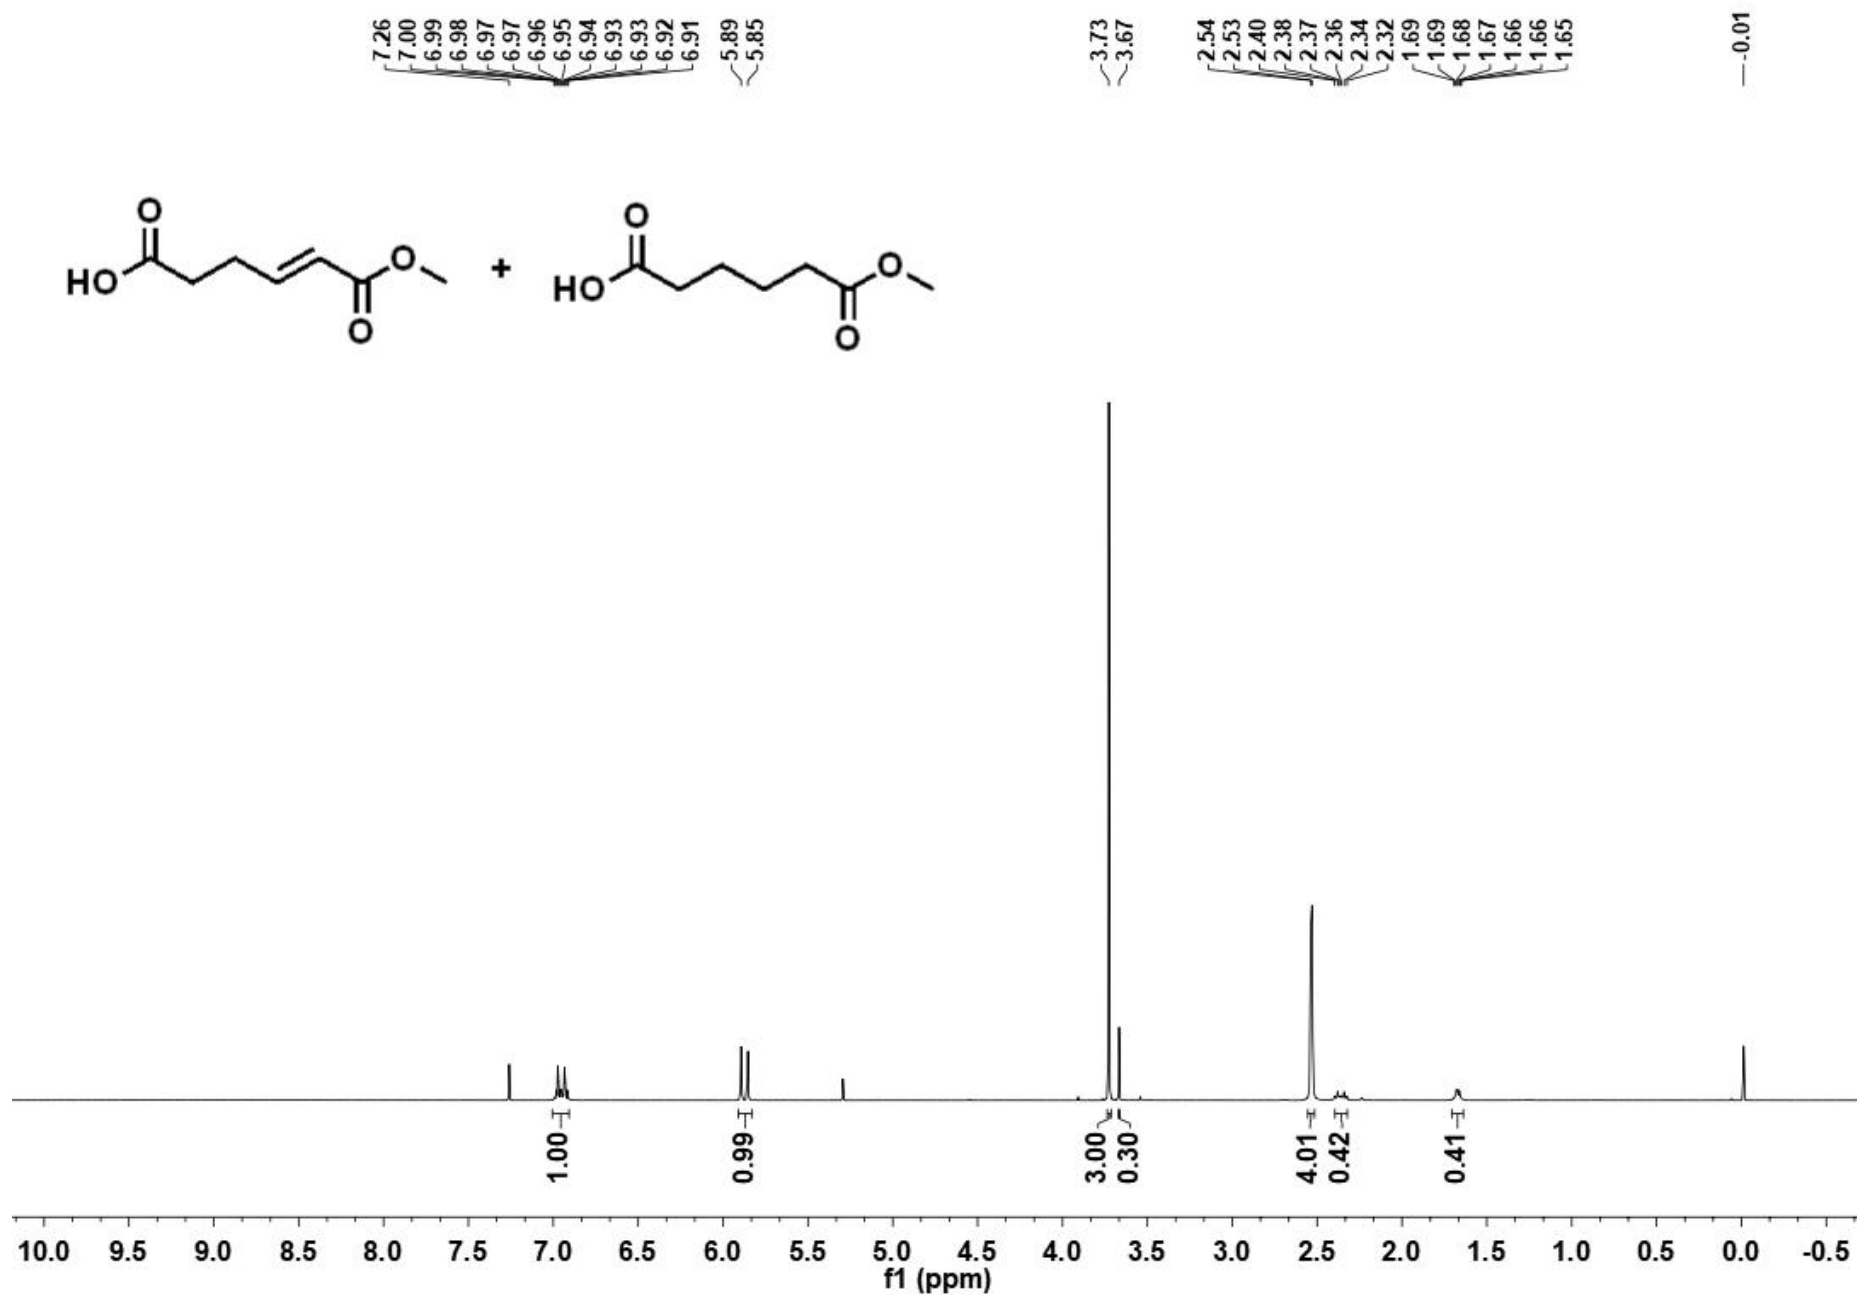

Supplement: Supplementary file 1 [file 23235545]
